# Supplementary material for: The interferon-rich skin environment regulates Langerhans cell ADAM17 to promote photosensitivity in lupus
Source: eLife. 2024 Jun 11;13:e85914. doi: 10.7554/eLife.85914 (PMC11213570; doi:10.7554/eLife.85914)
Supplement: Figure 5—source data 1. [file elife-85914-fig5-data1.xlsx]

## Sheet: 5A
WT v LCAD17 mice LC AD17 activity	WT	LC-AD17
112020	-25.4879	3.8765
112020	-92.405	-8.7622
112020	-66.667	-2.4314
	WT	LC-AD17
112020	1	-0.15209
112020	1	0.343779
112020	1	0.095394

## Sheet: 5B 
Histogram only

## Sheet: 5C
IFNk LC ADAM17
07122019 M1		PBS	IFN-k
	%TNFr1 change	-39.53	-22.934
	Normalized to PBS	1	0.580167
07122019 M2		PBS	IFN-k
	%TNFr1 change	-48.476	-28.149
	Normalized to PBS	1	0.580679
7242019		PBS	IFN-k
	%TNFr1 change	-37.386	-25.811
	Normalized to PBS	1	0.690392
06242020 007		PBS	IFN-k
	%TNFr1 change	-52.048	-23.235
	Normalized to PBS	1	0.446415
06242020 008		PBS	IFN-k
	%TNFr1 change	-56.813	-40.84
	Normalized to PBS	1	0.71885

## Sheet: 5D
AD17 MFI Levels
6.23.2020 001
No IFN		IFNk		IFNk ratio
ISO	945	ISO	945
Sample I	10956	Sample I	9667
Sample II	10951	Sample II	9694
Sample III	10583	Sample III	9595
Avg	10830	Avg	9652	0.88083
Avg ISO	9885	Avg ISO	8707
6.23.2020 002
No IFN		IFNk
ISO	933	ISO	933
Sample I	11109	Sample I	9941
Sample II	10713	Sample II	9825
Sample III	10540	Sample III	10123
Avg	10787.3	Avg	9963	0.916348
Avg ISO	9854.33	Avg ISO	9030
6.23.2020 003
No IFN		IFNk
ISO	927	ISO	927
Sample I	9653	Sample I	7904
Sample II	10043	Sample II	7952
Sample III	9135	Sample III	8556
Avg	9610.33	Avg	8137.33	0.830365
Avg ISO	8683.33	Avg ISO	7210.33
6.24.2020 004
No IFN		IFNk
ISO	864	ISO	864
Sample I	10841	Sample I	10474
Sample II	10815	Sample II	9894
Sample III	10219	Sample III	10507
Avg	10625	Avg	10291.7	0.96585
Avg ISO	9761	Avg ISO	9427.67
6.24.2020 005
No IFN		IFNk
ISO	806	ISO	806
Sample I	9752	Sample I	9204
Sample II	9393	Sample II	9516
Sample III	9368	Sample III	9078
Avg	9504.33	Avg	9266	0.9726
Avg ISO	8698.33	Avg ISO	8460
6.24.2020 006
No IFN		IFNk
ISO	755	ISO	755
Sample I	8999	Sample I	9149
Sample II	8803	Sample II	8670
Sample III	9167	Sample III	8810
Avg	8989.67	Avg	8876.33	0.986237
Avg ISO	8234.67	Avg ISO	8121.33
6.26.2020 007
No IFN		IFNk
ISO	827	ISO	827
Sample I	11122	Sample I	9543
Sample II	10521	Sample II	9142
Sample III	9693	Sample III	9151
Avg	10445.3	Avg	9278.67	0.878704
Avg ISO	9618.33	Avg ISO	8451.67
6.26.2020 008
No IFN		IFNk
ISO	776	ISO	776
Sample I	9372	Sample I	8241
Sample II	8866	Sample II	8656
Sample III	8755	Sample III	7931
Avg	8997.67	Avg	8276	0.912224
Avg ISO	8221.67	Avg ISO	7500

## Sheet: 5E
LC viability	PBS	IFNk
06232020 I	1	0.974895
06232020 II	1	1
06232020 III	1	1.01775
06242020 IV	1	1.00229
06242020 V	1	1.09293
06242020 VI	1	1.05226
06262020 VII	1	0.962606
06262020 VIII	1	1.0026

## Sheet: 5F
Tofa LC ADAM17 activity	PBS	IFNk	IFNk+tofa
%TNFR1 MFI change	-92.453	-69.34	-94.35
	-53.125	17.3913	-92.982
	-63.147	-41.441	-56.338
	-89.028	-85.436	-92.725
	-46.662	-38.184	-52.609
	-59.817	-20.039	-70.913
	-35.124	-20.015	-22.834
	PBS	IFNk	IFNk+tofa
relative change	1	0.75	1.02052
	1	-0.327366	1.75025
	1	0.656262	0.892172
	1	0.959653	1.04526
	1	0.81831	1.12745
	1	0.335005	1.1855
	1	0.569838	0.650097

## Sheet: 5G
Tofa LC AD17 exp	PBS	IFNk	IFNk+tofa
	1	0.953693	0.984925
	1	0.935378	0.947646
	1	0.988118	0.951864
	1	0.99342	0.968204
	1	0.983287	0.937992
	1	0.851632	0.900099
	1	0.906415	0.879936
	1	0.979897	0.912869

## Sheet: 5H
Tofa Live LCs	PBS	IFNk	IFNk+tofa
	1	1.01318	1.00732
	1	0.924145	0.98183
	1	0.868974	0.766378
	1	1.11268	1.26761
	1	0.919298	0.85614
	1	1.06182	1.11091
	1	1.07759	1.03233
	1	1.092	0.977333
	1	0.93943	0.902613
	1	1.00137	0.898491

## Sheet: 5I
LC ADAM17 activity	PBS	IFNb
2023-11-25	-8.69296	-2.42718
2023-11-25	-24.8054	-12.3413
2023-12-01	-35.996	-11.6958
2023-12-01	-24.9683	-21.0375
2023-12-02	-25.3394	-4.38367
2023-12-02	-8.67876	-2.53095
	PBS	IFNb
2023-11-25	1	0.279212
2023-11-25	1	0.497524
2023-12-01	1	0.324918
2023-12-01	1	0.84257
2023-12-02	1	0.172998
2023-12-02	1	0.291626

## Sheet: 5J
LC ADAM17 viability	PBS	IFNb
2023-11-25	1	1.11656
2023-11-25	1	0.913043
2023-12-01	1	1.06897
2023-12-01	1	0.95082
2023-12-02	1	1.1746
2023-12-02	1	1.03226

[truncated: 6 more sheets: 5K, 5L, 5M, 5N, 5O, 5P]
