# Supplementary material for: The interferon-rich skin environment regulates Langerhans cell ADAM17 to promote photosensitivity in lupus
Source: eLife. 2024 Jun 11;13:e85914. doi: 10.7554/eLife.85914 (PMC11213570; doi:10.7554/eLife.85914)
Supplement: Figure 6—source data 1. [file elife-85914-fig6-data1.xlsx]

## Sheet: 6A
500 LPR LC AD17 activity	MRL IgG	MRL anti-IFNAR	LPR IgG	LPR anti-IFNAR
9032019	-43.766	-43.686	-27.741	-41.129
9032019	-38.851	-31.825	-29.545	-29.68
9072019	-60.274	-45.946	-47.576	-54.933
9102019	-75	-65.517	-68.269	-90.517
7102020	-38.803	-13.856	-34.725	-55.444
7102020	-76.713	-32.118	-8.988	-81.613
7112020	-75.835	-96.986	-6.452	-86.778
7102020	-54.762	-47.295	-44.689	-57.183
	MRL IgG	MRL anti-IFNAR	LPR IgG	LPR anti-IFNAR
9032019	1	1.05755	0.671557	0.995655
9032019	1	0.770423	0.715228	0.718496
9072019	1	0.762286	0.789329	0.911388
9102019	1	0.87356	0.91025	1.20689
7102020	1	0.239898	0.601215	0.959936
7102020	1	0.556079	0.155615	1.41302
7112020	1	1.48527	0.0988078	1.32894
7102020	1	0.724289	0.684381	0.875717

## Sheet: 6B
500 LPR LC AD17 expression	MRL IgG	MRL anti-IFNAR	LPR IgG	LPR anti-IFNAR
7102020	1	0.68872	0.64586	0.7017
7102020	1	0.600001	0.69432	0.68612
7112020	1	1.05551	0.94623	0.76533
7112020	1	0.77308	0.8644	0.83404

## Sheet: 6C
125 LPR LC AD17 activity	MRL IgG	MRL anti-IFNAR	LPR IgG	LPR anti-IFNAR
3032021	-79.811	-70	-54.687	-62.162
			-56.25	-71.574
3042021	-96.25	-74.877	-59.926	-88.542
		50
3132021	-60.882	-70.303	-20.963	-45.752
	-39.8
3142021	-35.385	-38.504	-25.761	-37.216
	MRL IgG	MRL anti-IFNAR	LPR IgG	LPR anti-IFNAR
32021	1	0.877072	0.685206	0.778865
32021	1	0.777943	0.70479	0.896794
32021	1	-0.51948	0.622608	0.919917
32021	1	1.39654	0.41642	0.908842
32021	1	1.08814	0.72802	1.05174

## Sheet: 6D
500 LPR LC AD17 expression	MRL IgG	MRL anti-IFNAR	LPR IgG	LPR anti-IFNAR
32021	1	0.9797	0.84674	0.906319
32021	1	0.927878	0.973588	0.91779
32021	1.0175	0.98414	0.91667	0.91366
32021	0.98249	1.08508	0.959	0.92767
32021	1	0.85547	0.98829	0.851505

## Sheet: 6E
Sle1 LC AD17 activity	B6 IgG	B6 anti-IFNAR	Sle1 IgG	Sle1 anti-IFNAR
7112018	-39.538		-10.936	-59.605
7312018	-53.739		-28.571	-49.488
9202019	-40.569		-5.263	-21.053
7062020	-64.422	-47.787	-28.17	-63.77
7082020	-28.629	-31.2185	-25.152	-34.273
7082020	-27.577	-23.438	-12.162	-31.913
10042019		-55.303
10042019		-10.367
	B6 IgG	B6 anti-IFNAR	Sle1 IgG	Sle1 anti-IFNAR
7112018	1	0.741781	0.276595	1.50754
7312018	1	0.484594	0.531662	0.920895
9202019	1	0.834003	0.12973	0.518943
7062020	1		0.437273	0.989879
7082020	1.01872		0.390426	1.21955
7082020	0.981283		0.432765	1.13557

## Sheet: 6F
Sle1 LC AD17 expression	B6 IgG	B6 anti-IFNAR	Sle1 IgG	Sle1 anti-IFNAR
7/6-8/2020	1	0.916614	0.88619	0.943059
7/6-8/2020	1	0.8845	1.05398	0.627619
7/6-8/2020	1	0.829137	0.60204	0.471273

## Sheet: 6G
IMQ LC AD17 activity	WT IGG	IMQ IGG	anti-IFNAR IMQ
VZ	-7.39064	-4.77452	-13.0414
	-2.948	-0.78244	-9.63125
	-17.6919	-2.18639	-6.29843
			-6.55401
	-10.7438	-4.34189	-22.4299
			-16.3086
	-16.23	4.2081	-40.658
TML	-7.534	-2.833
TML	-15.222	-0.203
TML	-11.532	-4.225
TML	-10.523	-1.871
	WT IGG	IMQ IGG	anti-IFNAR IMQ
VZ	1	0.646023	1.76458
	1	0.265414	3.26705
	1	0.123581	0.356006
			0.370453
	1	0.40413	2.08771
	1		1.51795
TML	1	0.376057
TML	1	0.013347
TML	1	0.366387
TML	1	0.17775

## Sheet: 6H
IMQ LC AD17 expression	-IMQ+IgG	+IMQ+IgG
7122021	1	0.79069
7132021	1	0.87187
7162021	1	0.91716
8022021	1	1.1757

## Sheet: 6I
normalized live LCs	-IMQ+IgG	+IMQ+IgG	IMQ+antiIFNAR
TML 7122021	1	0.52551
TML 7132021	1	0.49353
TML 7162021	1	0.6577
TML 8022021	1	0.92
VZ 09152022	1	1.37273	0.9545
			0.409
VZ 09302022	1.019	0.897233	1.177
	0.98		1.63
VZ 10062022	1	1.518	2.096
VZ 10112022	1	1.0401	1.02679
		0.651786
