# Supplementary material for: The interferon-rich skin environment regulates Langerhans cell ADAM17 to promote photosensitivity in lupus
Source: eLife. 2024 Jun 11;13:e85914. doi: 10.7554/eLife.85914 (PMC11213570; doi:10.7554/eLife.85914)
Supplement: Figure 7—source data 1. [file elife-85914-fig7-data1.xlsx]

## Sheet: 7A
Timeline

## Sheet: 7B
500 MRL LPR ear thickness	Day 3					Day 4
	MRL MOPC	MRL anti-IFNAR	LPR MOPC	LPR anti-IFNAR		MRL MOPC	MRL anti-IFNAR	LPR MOPC	LPR anti-IFNAR
	37.5	39	43.5	36		39.5	40.5	48.5	37.5
	35.5	36.5	40.5	36		37.5	42.5	45	41
	36	42	41	41		37.5	47.5	48.5	45
	43	46.5	45.25	40.75		54.25	46.5	52.25	45.5
	39	44.6667	46.25	40.75		43.5	52.75	51.25	43
	45	58.25	46	49.75		39.5	60.5	47.6667	48
	41.5	49.75	48	42.75		40.5	50.5	52.75	47
	33.75	38.25	45	36.6667		35	46	50.5	45
	33.25	47.25	42.6666	44		38.5	58.5	46.6667	46
		43	46.5	34.5			52	48	35.5

## Sheet: 7C
500 MRL LPR epi perm	MRL MOPC	MRL anti-IFNAR	LPR MOPC	LPR anti-IFNAR
5292020	0.7615	1.8938	1.5397	1.0081
	1.2385	2.6766	1.2343	0.6803
			1.0283
6012020	0.9868	2.3628	1.5378	1.7784
	1.0132	5.0276	1.8718	1.6151
		1.7499		1.4888
7312020	1	1.1231	1.03	0.9069

## Sheet: 7D
125 MRL LPR ear thickness	Day 3					Day 4
	MRL IgG	MRL anti-IFNAR	LPR IgG	LPR anti-IFNAR		MRL IgG	MRL anti-IFNAR	LPR IgG	LPR anti-IFNAR
	33.25	37.75	49	34.5		38	37.5	44.5	38
	29.25	41.5	40.75	38.5		38.25	42	50.25	32.5
	28.75	40.5	42.25	41		33.75	46.75	47.25	47.75
	31.25	46.5	46.75	36.25		36.75	48	48.75	36
	34.75	49.5	51	46.5		43.75	58.25	53.5	49.25
	43.75	52.75	53.75	48.75		39.75	49.25	48.75	45

## Sheet: 7E
125 MRL LPR epi perm	MRL MOPC	MRL anti-IFNAR	LPR MOPC	LPR anti-IFNAR
7312020	0.708	1.264	2.1868	1.5272
	1.2992	1.5717	1.2759	1.1788
8032020	1.5206	0.8445	2.4252	0.7552
	0.4794	2.486	1.4854	0.3154
3062021	1	3.33409	1.6521	1.3808
3072021	1	1.5931	1.3769	0.8331

## Sheet: 7F
125 MRL LPR functional monocytes	MRL IgG	MRL anti-IFNAR	LPR IgG	LPR anti-IFNAR	125 MRL LPR functional neutrophils	MRL IgG	MRL anti-IFNAR	LPR IgG	LPR anti-IFNAR
2020-07-31	6950	4323	33602	16121	2020-07-31	21776	19183	44455	14520
	3710	2617	24842	8303		8121	7939	33748	5205
2020-08-03	5085	4122	14421	7832	2020-08-03	19067	9776	28198	10358
	3398	4716	15258	3511		10642	21692	31892	4158
2021-03-06	16447	6758		14989	2021-03-06	34675	56978		28948
2021-03-07	3736	9357	15297	16298	2021-03-07	8432	25486	16561	14591

## Sheet: 7G
Timeline

## Sheet: 7H
EGFRi ear thickness	Day 3					Day 4
	MOPC+DMSO	anti-IFNAR+DMSO	MOPC+PD168393	anti-IFNAR+PD168393		MOPC+DMSO	anti-IFNAR+DMSO	MOPC+PD168393	anti-IFNAR+PD168393
5192021	61.75	51	64	59.25		61.5	50	59.5	55.75
5222021	60.5	53.25	58	58.5		62	53.5	58	59
6142021	48.25	42.25	51.75	55		51	47.5	56.75	53.75
6162021	55.25	44.75	49	51.5		53	50.75	52.75	57.75

## Sheet: 7I
EGFRi epi perm	MOPC+DMSO	anti-IFNAR+DMSO	MOPC+PD168393	anti-IFNAR+PD168393
5192021	100	61.54	74.07	84.65
5222021	100	92.2	101.39	110.89
6142021	100	83.41	148.91	185.06
6162021	100	58.98	100.36	104.57

## Sheet: 7J
Timeline

[truncated: 2 more sheets: 7K, 7L]
