# Supplementary material for: The interferon-rich skin environment regulates Langerhans cell ADAM17 to promote photosensitivity in lupus
Source: eLife. 2024 Jun 11;13:e85914. doi: 10.7554/eLife.85914 (PMC11213570; doi:10.7554/eLife.85914)
Supplement: Figure 8—source data 1. [file elife-85914-fig8-data1.xlsx]

## Sheet: 8A
All cond	No UVR			Yes UVR			Fold change
	IgG	IgG	anti-IFNAR	IgG	IgG	anti-IFNAR		IgG	IgG	anti-IFNAR
	1279	1260	1160	2037	1577	1825		1	0.712154	1.00483
			2129			2810				0.732028
	1661	1924	2182	3430	1950	4771		1.12048	0.440407	0.949855
	2405		1412	6155		3571		0.879515		1.05555
	2379	1291	1998	3770	1617	2822		1	0.710812	0.75798
	2427	1766	2165	4385	2785	3451		1	0.709045	1.18557
		1919			3478				0.547623

## Sheet: 8B
LCs		No IFN
		No UVR	Yes UVR
2023-12-10	ROS/CTL	12.48	13.61
	Fold change compared to UVR-	1.09054
	Normalized	1
2023-12-11	ROS/CTL	13.16	9.758
	Fold change compared to UVR-	0.741489
	Normalized	1
2023-12-12	ROS/CTL	8.809	10.93
	Fold change compared to UVR-	1.24078
	Normalized	1
12/13/2023 Mouse 1	ROS/CTL	14.7462	17.9107
	Fold change compared to UVR-	1.2146
	Normalized	1
12/13/2023 Mouse 2	ROS/CTL	15.5877	17.2817
	Fold change compared to UVR-	1.10868
	Normalized	1

## Sheet: 8C
LCs		No IFN
		No UVR	Yes UVR
2023-12-10	ROS/CTL	5.39286	15.1426
	Fold change compared to UVR-	2.8079
	Normalized	1
2023-12-11	ROS/CTL	14.9048	30.2278
	Fold change compared to UVR-	2.02806
	Normalized	1
2023-12-12	ROS/CTL	21.8319	39.5492
	Fold change compared to UVR-	1.81153
	Normalized	1
12/13/2023 Mouse 1	ROS/CTL	8.0049	33.8164
	Fold change compared to UVR-	4.22446
	Normalized	1
12/13/2023 Mouse 2	ROS/CTL	7.90637	24.8157
	Fold change compared to UVR-	3.1387
	Normalized	1
