# Supplementary material for: The interferon-rich skin environment regulates Langerhans cell ADAM17 to promote photosensitivity in lupus
Source: eLife. 2024 Jun 11;13:e85914. doi: 10.7554/eLife.85914 (PMC11213570; doi:10.7554/eLife.85914)
Supplement: Supplementary file 1. [file elife-85914-supp1.xlsx]

## Sheet: Raw_Expression
X1NL_011911	X2rNL_011911	X3NL_011911	X4rNL_011911	X5NL_052411	X8NL_052411	X9NL_052411	GSM1267427	GSM1267428	GSM1267429	GSM1267430	GSM1267431	GSM1267432	GSM1267433	GSM1267434	GSM1267435	GSM1267436	GSM1267437	GSM1267438	GSM1267439	GSM1267440	GSM1267441	GSM1267442	GSM1267443	GSM1267444	GSM1267445	GSM1267446
10.2753	10.1928	10.3157	10.3829	11.1578	10.6526	10.8743	11.5516	11.5553	11.4818	11.6222	11.457	10.4094	11.8749	12.3584	11.2376	11.3977	10.1151	9.6744	8.61387	10.2987	10.8143	10.1178	10.7803	11.2952	10.9565	11.1718
7.5628	7.56275	7.24134	7.01024	8.33648	8.04105	8.11602	8.16831	8.31423	7.99165	8.20639	8.21782	6.52363	8.40754	7.98557	8.24757	7.90402	7.81259	7.21068	7.57411	7.93959	8.52323	7.91424	8.42479	8.49462	8.43686	8.43903
2.81179	4.17678	2.69216	2.61697	4.44052	2.70524	3.00474	3.01787	3.91343	3.10543	4.00087	2.92292	3.28548	3.3672	4.44588	3.44723	4.65113	4.25746	3.88877	4.15256	3.73362	5.93007	4.57492	3.70988	3.04806	4.86657	4.6286
2.57435	2.57435	2.57435	2.57435	2.57435	2.57435	2.57435	5.40804	5.21008	5.82699	6.4477	4.79028	5.21008	5.43321	4.7936	5.21008	5.21008	5.5888	5.5405	5.26108	6.12328	5.36947	5.93878	6.3023	4.67811	5.91703	5.3815
6.44063	5.34384	5.63554	7.42581	7.49016	7.01866	7.3474	5.33191	5.50769	7.75592	5.10462	5.26622	6.16932	6.57724	8.19185	5.57254	5.99472	5.65359	5.98004	6.33093	6.62027	7.50792	7.45781	6.47129	5.10455	4.95549	5.05964
5.372	5.35412	5.35412	5.52763	5.59398	5.3526	5.18877	2.9129	2.9129	4.59056	2.9129	2.9129	2.9129	2.9129	2.9129	2.93588	2.9129	1.74809	1.65976	1.65723	1.79372	1.83188	1.81144	1.76521	4.07209	3.54773	3.02489
6.00368	6.775	3.60656	4.848	7.42935	6.02004	6.02004	5.5644	5.26387	4.94917	6.06672	3.69097	5.46078	4.45949	3.47273	4.35603	6.13677	3.74834	3.89149	2.74913	3.52751	3.71458	3.96556	4.46676	4.77123	4.0657	6.31409
2.11019	2.06029	2.14915	5.81564	3.5647	3.28445	2.26052	3.49774	4.52626	6.73837	5.47963	4.81814	6.89685	6.00539	3.16655	4.38428	3.42109	6.51451	5.64239	7.67593	5.85273	7.43895	7.95997	6.9364	2.82145	2.55076	2.24674
3.26262	4.24654	3.05773	2.8767	2.62379	3.50151	3.50767	5.20719	4.28984	4.6676	4.00692	4.90052	6.67504	5.26961	4.16839	4.7468	5.24104	4.71125	4.99493	4.90533	4.67035	5.00414	4.55908	4.29968	4.95627	5.59131	5.3312
3.93445	4.09168	3.4468	3.50339	5.07294	4.21489	4.23085	6.17827	6.38067	4.42929	6.31418	1.39197	1.01451	6.27765	6.62621	6.39306	6.09604	4.49511	4.41725	4.41725	4.41725	4.81158	4.85701	5.8604	7.18057	4.95802	7.28858
8.4234	8.9647	8.85492	8.39686	8.74693	8.67341	9.3631	8.79071	8.90654	8.85514	8.26109	9.20607	7.17456	8.53623	9.24804	8.28399	8.31316	8.35054	8.63951	7.99277	8.40599	8.6112	7.81469	8.53043	8.16554	8.16613	8.23214
8.66274	9.1325	8.0111	8.37837	9.07692	8.2404	8.44116	10.0976	10.2347	10.3698	10.6063	9.77205	10.4838	10.4053	11.1189	10.559	10.8042	9.11402	9.46701	9.27916	8.57244	10.3761	8.27057	9.43309	9.7307	9.9948	9.50666
7.84525	7.12778	6.88835	7.86572	6.81383	6.74753	6.8897	6.04756	7.41148	5.8797	6.57608	5.0858	5.53947	5.84936	6.56047	7.27824	7.51391	7.17063	6.3153	6.97048	6.73171	6.24452	5.37914	5.89261	7.07686	5.86	6.10021
6.05871	6.10983	6.06898	6.06898	6.39174	6.06559	6.32205	8.27102	7.95486	9.62403	8.26263	8.41464	8.97217	9.05644	9.50853	8.11053	8.84318	7.88582	8.43324	8.84157	8.61261	9.43049	9.29645	8.26066	8.07402	8.2935	8.38083
8.1739	8.11033	6.02036	7.46251	8.47761	6.91161	7.51621	6.69169	6.91555	6.20157	7.72308	6.436	8.39823	7.65309	6.53092	7.3271	7.99033	7.23661	7.15996	6.00591	7.56785	7.74766	7.50031	7.4166	8.11706	8.06483	8.43855
2.05099	2.05099	2.05099	2.05099	2.05099	2.05099	2.05099	2.08912	2.06993	2.06993	2.06993	2.06993	2.06993	2.06993	2.15556	2.06993	2.06993	2.11276	2.11276	2.11276	2.11276	2.11276	2.11276	2.11276	2.11276	2.11276	2.11276
3.99358	4.00427	3.41074	3.43326	4.52068	3.96757	4.1382	3.24987	3.47781	4.11958	4.16299	2.87034	2.12782	3.44132	3.41375	4.04249	3.56971	2.60829	3.09832	2.7694	2.6977	3.42241	3.42241	3.42241	3.10942	2.65674	3.41925
8.48715	8.68857	8.34556	8.16211	9.86237	9.72935	9.70081	10.736	11.0588	11.0325	11.5992	11.375	9.16798	11.2457	11.4491	11.1574	11.0393	9.67408	9.90165	9.84685	9.76805	11.0393	10.3344	10.647	11.017	10.8522	10.9989
9.64409	9.72958	9.6614	9.93744	10.6722	10.9836	10.9134	11.002	11.5275	11.6609	11.3511	10.8216	10.5242	11.1491	11.5271	11.5486	11.3674	10.5368	11.1235	10.4581	10.227	10.8549	11.2618	10.9939	11.1342	11.1829	10.5136
12.6904	13.4338	12.7183	12.4444	13.6022	13.0581	13.428	13.8753	13.8474	14.2642	13.9356	13.9896	14.0856	13.9159	13.7991	13.9251	13.8833	13.2001	13.3883	13.1388	13.4149	14.2113	13.5174	13.7265	13.7274	13.6964	13.9873
13.793	14.2697	13.9131	13.8307	14.443	14.1621	14.1649	14.4707	14.4939	14.6338	14.4905	14.6005	14.2999	14.6385	14.3538	14.2881	14.3917	13.8466	14.2654	14.14	14.0359	14.5404	14.2806	14.3416	14.3482	14.3611	14.3905
13.4012	13.1971	13.309	13.2205	12.4916	13.1971	12.9194	13.4454	13.4369	13.4803	13.5769	13.3977	13.6191	13.4693	12.9792	13.4324	13.5241	13.6423	13.6465	13.3037	13.4765	13.2212	13.3211	13.4386	13.3451	13.4311	13.3305
11.6081	11.7805	11.3629	11.5905	12.5777	12.4549	12.3707	11.9228	11.9128	12.1448	12.4814	11.8292	12.3788	12.4435	12.5839	12.113	12.1749	11.7324	11.7103	11.6294	11.7314	12.2502	12.0118	12.053	12.1665	12.1134	12.2514
11.938	11.9406	12.1796	12.4077	12.7914	12.5979	12.7231	12.1671	12.1936	12.2955	12.0992	12.4295	12.0749	12.3222	12.6445	12.251	12.2782	12.043	12.3884	12.1211	12.404	12.7408	12.4802	12.6682	12.1789	12.4266	12.4678
10.6709	10.1959	9.96458	10.3272	10.5928	10.471	11.0048	10.7309	11.1356	8.14418	11.2116	9.95576	10.8637	11.0588	10.2205	10.9923	11.2083	11.5429	10.9424	11.2292	11.1875	9.43036	11.1176	10.9188	11.3072	11.1674	11.4394
14.2474	14.093	14.1183	14.1603	14.0001	14.0062	13.9628	13.009	13.0873	13.2819	13.3021	12.9018	13.2086	13.1399	12.7669	13.0734	13.4207	13.5398	13.2359	13.3371	13.3594	13.236	13.3125	13.2016	13.2699	13.3214	13.2874
13.4892	13.594	13.4022	12.8867	14.0446	14.0333	14.0329	14.3429	14.3943	14.2889	14.5198	14.3413	14.3803	14.3665	14.3002	14.2806	14.3189	13.9697	13.8104	13.7017	13.6147	14.1086	14.2132	14.2901	14.4214	14.4063	14.4383
11.7819	11.7689	11.9296	11.8164	11.2077	11.411	11.2598	11.3458	11.3168	11.2553	11.911	11.9908	11.7495	11.6571	10.8327	11.5056	11.4269	11.7567	11.4965	11.5765	11.5599	11.1887	11.5587	11.6222	11.5001	11.4895	11.5463
14.5565	14.5588	14.5476	14.4752	14.4584	14.4903	14.4903	14.2501	14.24	13.9279	14.4549	14.3059	14.484	14.2934	14.3335	14.1754	14.2188	13.9846	14.0794	14.1403	14.1175	14.1514	14.1209	14.1168	14.2357	14.1334	14.2987
12.4056	12.464	12.4971	12.3183	12.0624	12.2644	11.9565	11.8705	11.6914	11.7541	11.8761	11.9032	12.129	11.8642	11.8051	11.7164	11.9752	12.0748	12.0236	12.2417	12.205	12.3511	12.1145	12.1027	12.0969	11.9674	11.9176
12.9261	12.6698	12.6612	12.8456	12.4216	12.6612	12.4641	12.331	12.3816	12.5883	12.583	12.6878	13.0319	12.5352	12.5087	12.7198	12.5949	12.668	12.7573	12.6744	12.5905	12.0493	12.4621	12.451	12.5598	12.6011	12.603
14.5587	14.6498	14.6173	14.4396	14.4752	14.569	14.518	14.3628	14.3291	14.3441	14.2934	14.3532	14.2211	14.1698	14.2254	14.2503	14.2968	14.2123	14.0783	14.2331	14.1061	13.8482	14.1993	14.0837	14.4547	13.834	14.3419
13.0046	13.3597	12.8196	12.8028	13.9083	13.6869	13.7922	13.642	13.9204	14.1351	14.018	13.9429	14.1048	13.8949	13.7724	13.6561	13.7462	13.1881	13.0826	13.0479	13.0722	13.7911	13.6011	13.8741	14.0029	14.0057	13.9912
13.2608	13.3837	13.3093	13.5411	13.151	13.0933	13.1156	11.5691	11.7511	11.7898	11.7406	11.5991	12.1287	11.6701	11.3659	11.4438	11.9355	11.8614	11.9542	12.0936	12.0732	11.5542	11.8345	11.8396	11.8204	11.7405	11.8638
13.5517	13.6491	13.655	13.7842	13.6491	13.6491	13.5672	13.3313	13.3195	13.2581	13.3561	13.2874	13.252	13.2291	13.0892	13.1806	13.1798	13.1378	13.2506	13.3739	13.5576	13.6056	13.4941	13.5799	13.4344	13.2413	13.2653
13.6569	14.1002	13.3941	13.1437	14.1112	13.9153	14.1702	14.5855	14.6079	14.378	14.7226	14.3287	13.946	14.7101	14.4409	14.4957	14.5959	13.7378	13.8755	13.5058	13.5593	14.1259	13.8862	14.0634	14.4677	14.5097	14.5865
13.509	13.8042	13.1432	12.9535	13.8153	13.6696	13.7418	13.2505	13.3271	13.0174	13.7828	13.518	13.9845	13.2673	12.9916	13.2831	13.3113	12.943	13.163	12.73	12.7473	12.9092	12.865	13.1026	13.4531	13.4798	13.7265
12.4566	12.8912	12.157	11.6996	13.5425	13.055	12.8629	13.8902	13.597	14.1106	13.721	13.4726	13.496	13.7787	13.6655	13.7079	13.7102	12.9609	12.8226	12.567	12.8988	13.5679	13.0598	13.4631	13.7167	13.8179	13.9964
14.3488	14.4703	14.5837	14.3607	14.3607	14.2785	14.3502	14.8308	14.8122	14.8932	14.6781	14.7881	14.7178	14.7429	14.6086	14.6956	14.6452	14.4965	14.4635	14.6408	14.5328	14.3305	14.4723	14.504	14.716	14.7513	14.8036
12.3043	12.1063	12.223	12.1063	11.6042	12.0827	11.8922	11.9521	11.8485	12.5111	11.635	12.2773	12.1698	12.0914	12.2434	12.0034	11.8905	12.5979	12.4703	12.0399	12.2752	11.9687	11.9454	12.4164	12.1249	12.207	12.1104
13.7991	13.9367	13.941	13.9727	13.5582	13.7813	13.8413	11.8449	11.8703	11.7932	12.2682	12.3671	12.0518	12.1299	11.9443	11.7543	12.1581	12.1879	12.2014	12.6102	12.0891	12.2784	11.9124	12.0649	11.8835	12.1664	12.0594
13.9429	14.1426	13.7891	13.7481	14.4658	14.3652	14.3769	14.6725	14.7345	14.5966	14.7587	14.8589	14.8685	14.5954	14.5236	14.3722	14.4604	13.9946	14.1752	14.0013	13.9999	14.6116	14.364	14.5301	14.6555	14.5655	14.7649
13.1048	13.2058	13.1438	13.006	13.2402	13.2986	13.3634	13.0665	13.3985	13.082	13.132	13.4948	13.4226	13.1507	13.1687	12.9112	12.9385	12.9286	13.0466	12.7966	12.8262	13.072	12.6532	12.9758	13.2511	13.0929	13.1226
14.6104	14.6514	14.6807	14.5134	14.5521	14.6096	14.6096	14.7109	14.6452	14.7066	14.7515	14.5821	14.4811	14.7885	14.7703	14.6734	14.731	14.5197	14.4723	14.4084	14.5249	14.5903	14.4627	14.607	14.9214	14.8669	14.962
13.6849	13.5894	13.7427	13.9554	13.1686	13.5803	13.5851	14.1089	14.0764	13.25	13.7477	14.2381	14.5161	13.9819	14.2666	13.7997	13.7562	14.3565	14.1592	14.3973	14.2723	13.8309	14.2487	14.0823	13.8766	14.052	14.0495
13.9717	13.9771	13.8886	13.5246	14.2749	14.4737	14.3617	14.7359	14.7979	14.3964	14.6339	14.775	14.7807	14.6823	14.5514	14.5639	14.5529	14.2832	14.3075	14.0928	14.0635	14.2236	14.3323	14.3637	14.7298	14.775	14.7534
8.93052	9.06444	8.39797	8.93052	9.27034	8.77219	8.93052	9.90001	9.89653	10.6042	10.5496	10.152	10.6572	9.45764	10.0075	9.82625	9.70274	9.40611	9.45358	9.45358	9.45358	10.0119	9.42858	9.45358	9.59235	9.45358	9.41712
13.5668	13.819	13.436	13.0322	14.1298	13.7625	13.9485	13.9117	14.0964	13.9461	14.4032	14.0972	14.238	14.1545	13.8533	13.9067	13.9978	13.3252	13.4576	12.8987	13.2148	13.847	13.2829	13.5629	13.8187	14.2876	13.993
11.1869	11.4996	11.5144	11.3813	10.5013	10.7213	11.1208	11.4096	11.4851	12.0376	11.1679	11.8548	11.6765	11.6899	11.9725	11.5305	11.3976	12.0562	11.6242	11.7168	11.7301	11.4331	11.1421	11.7763	11.6251	11.7769	11.4549
14.7617	14.6074	14.5676	14.3893	15.1815	15.1662	15.136	14.9441	14.9255	14.8133	14.8893	14.8829	15.0835	14.9071	14.6565	14.7507	14.8256	14.4817	14.4458	14.19	14.3201	14.7746	14.7661	14.8892	14.9291	14.9005	15.0137
10.5182	10.3382	10.6808	10.7808	10.9625	10.8696	11.0561	10.5745	10.3961	10.1318	10.2449	10.6499	10.4731	10.5349	9.95134	10.4385	10.3893	10.6757	10.3554	10.5894	10.8785	11.1626	11.1418	10.7705	10.0921	10.2553	10.5658
12.7026	12.7566	12.6436	12.7793	12.5325	12.6496	12.6522	11.4659	11.8022	12.0514	11.9373	11.8836	12.2866	12.1313	12.1862	12.0996	12.0033	12.0413	12.0516	12.1368	12.1326	11.9113	11.8975	12.0227	12.1964	12.0616	12.0979
13.7622	13.7663	13.7102	13.8105	13.7663	13.7407	13.833	13.1806	12.9471	12.8927	12.6968	13.0515	12.4556	13.0278	13.4336	12.7582	12.7021	12.6838	12.8948	12.6442	12.9982	12.3123	12.7741	13.022	13.0565	13.0387	12.891
9.9361	10.4284	10.2376	10.5893	11.3728	11.1759	11.3149	10.2993	10.3485	10.9025	10.7622	10.5782	10.8074	10.8354	9.81088	10.6921	10.6435	10.1003	10.5646	10.6153	10.6933	11.0886	11.1002	11.0721	10.9673	10.6326	11.1411
9.79135	9.52652	9.77383	9.66893	9.45592	9.57955	9.56635	11.9591	12.322	11.7534	12.3277	12.1592	12.2128	11.913	12.3	12.0096	11.9565	12.3394	11.3422	12.2775	12.1826	12.3722	12.0749	12.0844	12.1889	12.0949	12.0115
11.8937	12.0585	12.2804	12.0006	11.5679	11.8873	11.4275	11.9995	11.9875	11.2669	12.1235	11.8255	12.2615	12.0126	11.9052	12.0503	11.9106	12.0629	11.9287	11.7899	12.021	11.6961	11.8803	11.8577	12.0059	11.7293	12.0312
9.46939	9.46755	9.22871	9.50754	10.0289	9.57045	9.75914	9.37362	9.27277	10.2083	9.74402	9.2281	9.55519	9.39315	9.16872	9.48455	9.38118	9.42405	9.46143	9.15782	9.33658	10.0094	9.3348	9.631	9.43872	9.12818	9.605
10.0438	9.90233	10.1274	9.62772	10.5921	10.4652	10.7035	11.5457	12.0614	10.8459	12.3556	12.108	12.1786	11.6814	11.8471	11.9255	12.4721	11.3671	11.1344	11.1687	11.0259	11.4475	11.6228	11.6861	11.6012	11.7584	11.638
12.1773	12.1773	12.4554	12.2662	11.2904	12.1773	11.6019	12.3037	12.2583	12.6409	12.5354	12.268	12.5163	12.2469	12.0616	12.1579	12.3471	12.3747	12.1627	12.5117	12.3416	12.0292	12.1986	11.9955	12.2502	12.2749	12.1117
10.9048	10.6086	10.4759	10.5753	11.625	11.1313	11.3484	11.286	11.702	11.7334	11.8525	11.6887	11.9043	11.8851	11.7361	12.0573	12.0757	11.225	11.2984	11.2861	11.2214	11.6988	11.5376	11.6374	11.6042	11.665	11.8782
9.91783	10.1091	9.75695	9.62288	9.09519	9.62288	9.21406	7.424	7.92518	8.12263	8.44487	8.20063	9.0871	8.20689	7.55147	8.37327	8.20689	7.96157	7.74339	8.03481	7.72439	7.53425	7.76022	7.48519	8.0436	7.99505	7.92954
10.1587	9.97369	10.2331	10.1636	9.42763	9.72446	9.53209	11.2842	11.4476	11.4782	11.3251	11.5769	11.6568	11.6011	11.6309	11.4217	11.4768	11.422	11.3511	11.7523	11.4148	11.0862	11.1368	11.071	11.316	11.3173	11.0222
7.93797	7.93797	7.65258	7.66299	8.20324	7.93797	8.03	8.68895	9.25187	9.15448	9.26617	8.68415	8.72803	9.37305	9.80714	9.42711	9.26517	8.1601	8.53782	8.42691	8.09766	8.99939	8.55658	8.56681	8.70842	8.05708	8.05708
10.1137	9.90573	10.3363	10.3702	10.2346	10.5612	10.73	10.734	10.5536	9.49053	10.9008	10.4545	10.7857	10.8298	10.0716	10.6081	10.5301	10.9369	10.3526	10.3246	10.6371	10.8641	10.5355	10.6863	10.4454	10.6596	10.9872
7.93878	7.95779	7.23042	7.73501	8.70016	7.88798	7.93878	8.83774	9.10077	9.31688	8.91017	8.84652	8.9002	9.16456	9.48311	9.0123	8.96663	8.01709	8.51764	8.35244	8.43253	8.84391	8.78985	8.83825	8.96	9.03108	8.66989
7.94717	8.56766	8.72262	8.56766	8.99593	8.76078	8.31777	7.50324	7.47718	8.16869	7.3365	7.97723	8.1958	7.54936	7.60576	7.22925	7.60576	8.64879	8.37541	7.88479	8.35816	9.15802	9.16367	8.62574	7.30834	7.50345	7.76243
8.23552	9.02428	8.85625	9.05112	9.38005	9.37946	9.82075	10.2449	10.2973	11.4155	10.5284	11.2617	10.3834	10.318	10.3809	10.3988	9.90701	9.93368	10.3854	9.99248	10.0251	11.017	10.4809	10.4845	10.0102	10.0612	9.82347
8.95494	8.67373	9.63818	8.5811	7.84804	8.20026	8.43452	9.6356	9.87882	9.63012	9.35238	9.74971	10.3106	9.61666	9.23488	10.0233	9.532	9.80059	9.12492	9.75516	9.40952	9.08374	9.11029	9.13965	9.10327	9.43097	8.94648
13.4496	13.3947	13.4534	13.3953	12.974	13.1167	13.1798	12.8117	12.934	11.9832	13.0369	12.9369	12.7531	13.1317	13.1553	12.8847	12.946	13.1053	12.689	13.1689	12.8611	12.4526	12.5393	12.5631	12.8993	12.8747	12.8275
9.64077	9.71247	9.22344	9.48613	10.4115	10.1428	10.2614	12.0434	11.9855	12.361	12.0963	12.4436	11.0661	12.3162	12.6381	11.8752	12.0606	11.4198	11.279	11.3035	10.9885	11.6839	11.8178	12.0143	12.0288	11.7634	11.9276
12.631	12.2831	12.4374	12.379	11.9736	12.3752	12.1699	12.6303	12.8365	11.8877	12.9587	12.4192	12.8195	12.6609	12.4733	12.8743	13.0312	12.9829	12.7916	12.923	12.7357	12.5372	12.7789	12.562	12.5586	12.6849	12.5244
11.2583	11.3379	11.1596	10.9998	11.1051	10.778	11.1046	11.1468	11.2905	10.9766	11.5251	11.0711	11.2741	11.3	11.2715	11.1047	11.1627	11.0056	10.8942	11.153	10.8439	10.976	10.6201	10.879	10.8372	10.8952	10.7367
14.5944	14.5299	14.5469	14.4901	14.4416	14.4781	14.4965	14.9507	14.9581	15.082	14.8672	14.9696	14.9365	14.891	14.9049	14.8254	14.8199	14.9892	14.9084	14.8436	14.7966	14.7713	14.7019	14.8013	14.9054	14.7959	14.8225
12.355	12.1706	12.0329	12.4111	13.0053	12.6018	12.9325	12.8722	12.9197	11.6449	13.0848	12.9042	13.162	13.1763	12.9982	12.8155	13.1941	12.7375	12.7259	12.5394	12.786	13.0228	12.7581	12.826	12.9425	13.0353	12.8956
12.9787	13.0231	12.6356	12.9226	12.7446	12.6857	12.7641	12.7511	12.9778	12.5028	13.0089	12.6913	11.7816	12.9045	12.8194	12.9332	12.9976	12.8633	12.8805	12.7961	13.0719	12.8038	12.6332	12.6719	12.7064	12.4565	12.9116
11.1171	11.1171	10.5695	10.9696	11.4567	11.1835	11.2286	10.4013	10.6888	10.2692	11.0757	10.6976	11.2027	10.7133	10.9015	10.7846	10.562	10.5715	10.9696	10.5288	10.4947	10.9366	10.6991	10.7131	10.6942	10.6655	10.9223
12.3902	12.3628	12.4777	12.2645	12.1545	12.1631	11.9984	12.247	12.3035	12.0288	12.3224	12.3504	12.6834	12.4199	12.0963	12.5047	12.4533	12.413	12.8014	12.2144	12.6251	12.638	12.1813	12.5186	12.4014	12.2124	12.1627
13.756	13.7766	14.0368	13.7585	13.4028	13.679	13.5952	12.8901	12.9248	13.0939	12.8463	13.2552	12.9686	12.9079	12.7836	12.646	12.7529	13.1388	12.8801	13.2905	13.2349	12.694	13.0483	12.9919	13.0567	13.127	12.925
8.73031	8.11012	8.26225	8.49096	7.44968	8.20439	7.9254	7.46099	7.21123	7.58197	7.74484	8.00357	8.5611	7.64888	8.23876	8.31775	8.24813	7.72922	8.06693	8.3048	7.85891	8.01342	7.87147	7.65683	7.76999	7.33304	7.52902
11.079	11.5419	11.2849	11.1265	11.4123	11.1861	10.9343	9.95602	10.2636	10.8676	10.4987	10.418	10.3624	10.0843	10.4245	10.1026	10.3805	9.49971	9.9024	10.1796	9.6963	9.81873	9.54459	10.0542	10.0563	10.288	9.11859
11.4928	11.6953	11.5147	11.6515	10.5062	11.0898	10.8609	10.6981	10.8671	11.0248	10.859	11.0872	11.3732	10.7049	10.7891	10.7721	10.9142	11.5589	11.004	11.6725	11.3828	10.741	10.8089	10.6302	10.8558	10.8785	10.4637
11.0216	11.1764	10.962	11.1872	11.0413	10.6469	11.0034	11.4301	11.6442	10.6566	12.0055	11.5583	11.7733	11.6752	11.463	11.3682	11.5176	11.5495	11.3281	11.8109	11.8231	11.7627	11.2793	11.3374	11.7531	11.2575	11.6489
12.2381	12.0848	12.2601	12.0328	11.2139	11.5569	11.4034	12.6474	12.8733	12.5671	12.6147	12.6163	12.5115	13.0055	13.184	13.0652	12.7655	13.2031	12.7758	13.1144	12.7793	12.5468	12.3309	12.5361	12.893	12.867	12.2615
14.123	14.2302	13.9791	13.8446	14.3296	14.2645	14.2405	14.083	13.9992	13.875	14.213	14.0522	14.3163	14.0623	14.0297	14.0183	14.0761	13.6086	13.7913	13.503	13.7158	13.9632	13.8297	14.066	14.1417	14.1499	14.1132
10.7171	10.8454	10.0591	10.3066	11.4343	10.7171	11.0277	12.3413	12.2952	12.4928	12.5088	11.5072	9.28376	11.8733	12.2244	12.1275	12.0702	10.9912	11.0262	10.577	10.9	11.4002	11.2186	11.3454	11.6341	11.7486	11.9911
9.03832	9.18248	8.99242	9.14565	9.80609	9.44571	9.43319	9.24417	9.03828	9.75734	9.3906	9.3084	9.0729	9.42335	9.67475	9.14302	9.44079	8.8742	8.97796	8.93637	8.95957	9.03443	8.98426	8.83007	8.98368	9.00946	9.12198
12.9385	13.0017	13.2258	13.1381	13.1131	13.1435	13.401	13.9976	14.0373	13.8793	13.8917	13.9459	13.4295	14.1757	13.8458	13.8239	14.0658	13.7222	13.7634	13.5051	13.8383	13.8243	13.8505	13.8152	13.6878	13.3935	13.814
8.9882	9.25071	9.83344	9.696	10.6623	10.0046	10.8111	11.3397	11.2602	11.3578	10.78	11.4528	9.33712	11.3229	10.7435	10.6443	10.8203	10.5608	9.78035	10.4287	10.7052	11.5391	11.3733	11.0773	10.5675	10.7712	10.8898
10.4942	10.6696	9.76453	10.1611	11.3613	10.8877	11.0275	10.7954	10.9358	10.2594	11.2869	11.0734	11.0964	10.9087	10.5246	10.9441	10.9562	11.3486	11.1072	10.848	11.0378	11.4673	11.2885	11.2557	11.1497	11.0004	11.1291
14.1079	14.0076	14.1992	13.9721	13.8717	13.9501	13.7181	14.552	14.3529	14.2483	14.2687	14.287	14.2916	14.1884	14.4325	14.3399	14.2889	14.2042	13.7771	14.2204	14.0091	14.0898	14.0405	13.9987	14.2389	14.1036	14.1223
14.551	14.5447	14.5447	14.0429	14.5105	14.632	14.6171	14.9376	14.9059	14.4392	14.7579	14.6971	14.8074	14.8785	14.5721	14.7832	14.826	14.3996	14.371	14.1855	14.2405	14.4766	14.4332	14.6369	14.7936	14.8538	14.9125
13.0414	13.2083	13.0061	12.4022	13.5903	13.3132	13.3089	14.5898	14.4741	13.8204	14.5661	14.1122	14.438	14.2178	13.9918	13.9451	13.9472	13.6113	13.6085	13.3129	13.4572	13.6619	13.5336	13.8381	14.0207	14.1937	14.3892
11.236	11.1835	11.1079	11.1509	11.163	11.3345	11.1857	11.4631	11.541	11.0629	11.9197	11.4298	11.0797	11.4136	11.3828	11.4782	11.496	11.0864	11.1093	10.9389	10.8484	10.526	10.8658	11.1695	11.3581	11.3255	11.2312
10.5124	10.2813	10.3598	10.1901	9.0895	9.75203	9.3982	11.0512	11.4984	10.5123	11.1811	10.8701	11.7468	11.6642	11.4422	11.7989	11.7095	11.9042	11.3632	11.5441	11.4196	11.0806	11.0421	11.0462	11.138	11.1721	11.0729
9.85564	10.3205	10.2619	10.0038	10.8967	10.2527	10.4114	11.7591	12.0155	12.2725	12.0468	12.1686	11.4919	11.6224	12.1142	11.4147	11.6308	11.0854	11.0713	11.0957	11.4071	12.2729	11.4445	11.3738	11.4118	11.3297	11.4738
11.3891	11.7178	11.6993	11.2698	12.394	12.0642	12.3227	13.1234	13.3037	13.3397	13.1386	13.6151	12.9578	13.2245	12.9876	12.8442	12.8761	12.7618	12.3677	12.1643	12.4229	13.3684	12.761	13.0612	12.7557	13.1636	12.921
13.2743	13.3986	13.5051	13.1179	12.7755	13.087	13.0223	13.2472	13.3047	12.5258	13.2872	13.3838	13.3674	13.1323	12.9935	13.1118	13.2289	13.1945	12.98	13.0891	13.1178	12.9536	13.0667	13.1066	13.3054	13.4577	13.173
14.0923	14.1047	13.9945	13.6241	14.1475	14.1443	14.2158	14.715	14.5438	14.9332	14.793	14.9932	14.8202	14.6634	14.8374	14.6009	14.488	14.1387	14.308	14.3295	14.1309	14.3207	14.3747	14.4451	14.6479	14.6069	14.75
14.4326	14.5331	14.2479	14.0469	14.6617	14.6947	14.6152	14.638	14.6727	14.4925	14.9019	14.7307	14.6536	14.6852	14.6915	14.5832	14.6303	14.3755	14.3173	13.8659	14.0059	14.3895	14.3064	14.4305	14.6591	14.6091	14.5765
12.5098	12.5734	12.4268	12.3589	12.5005	12.5507	12.5268	12.5375	12.4659	12.7433	12.4221	12.6553	12.7116	12.5085	12.3529	12.5088	12.408	12.3893	12.6421	12.206	12.404	12.4991	12.4871	12.5603	12.7295	12.5425	12.5371
14.7355	14.5482	14.6358	14.5482	14.4343	14.5482	14.3607	14.8465	14.9168	14.6089	14.8511	14.943	15.0006	14.9464	14.9626	14.8511	14.863	14.9938	14.6674	14.8375	14.5983	14.443	14.6438	14.5791	14.6428	14.9269	14.6263
12.4075	12.5601	12.6089	12.1279	12.6494	12.8227	12.8661	12.8453	12.9657	12.8974	13.0674	13.3783	12.9327	12.8139	12.537	12.6248	12.4751	12.2232	12.1289	12.0691	12.2628	12.8061	12.3719	12.6026	12.782	12.7756	12.8181
13.5262	13.6237	13.6284	13.2897	13.6496	13.6237	13.7733	13.9208	14.0724	13.8286	14.0395	13.7869	13.5201	14.1127	13.9962	13.9303	13.854	13.4973	13.3367	13.0485	13.1603	13.5439	13.2312	13.374	13.6606	13.6695	13.6332
12.433	12.2148	12.5433	12.6866	12.2883	12.4695	12.4521	11.5382	11.9324	11.0325	11.9406	11.3466	11.6577	11.6708	11.6368	11.9486	11.9165	11.9732	11.9291	12.1721	12.1008	11.8455	11.9707	12.001	11.7858	11.7421	11.6958
13.3807	13.3287	13.4041	13.2463	12.5839	13.0567	12.9591	13.1085	13.2655	12.6533	13.6683	13.321	13.6506	13.1203	12.989	13.3749	13.1051	13.4232	13.2831	13.4116	13.4566	12.6584	13.0613	13.1939	13.365	13.2629	13.3509
11.7061	11.815	11.2445	11.5315	11.6682	12.0614	11.7061	12.1786	11.748	12.4047	11.6172	12.4216	12.2371	12.2167	12.5186	11.6128	11.9834	11.3857	11.6966	11.67	11.3678	11.8496	11.8234	11.9034	12.2004	11.937	12.1931
14.9294	14.9925	14.9925	14.6529	15.0108	15.0341	15.0707	15.1397	15.1649	14.9951	15.186	15.1316	15.1858	15.09	15.0289	15.0801	15.1304	14.7492	14.8506	14.6835	14.5676	14.7772	14.6407	14.8452	15.0718	15.0648	15.17
11.1255	10.6721	10.8113	10.9999	11.1874	10.9232	11.4087	11.2186	11.2027	9.46585	11.2181	10.8195	11.2304	11.2027	10.8928	10.9311	11.1288	11.7194	11.1325	11.4382	10.9345	10.9315	11.0771	11.1608	11.2079	11.0187	11.2126
13.3594	13.1276	13.4204	13.3219	12.4445	12.987	12.8868	12.4127	12.6169	12.4446	12.6875	12.6828	12.7717	13.0458	12.5686	12.4616	12.7776	13.2731	12.5093	13.218	12.9627	12.133	12.5377	12.7808	12.5934	12.6141	12.4871
13.3486	13.4479	13.6022	13.2841	12.6924	13.1999	12.8389	13.2039	13.3142	12.6758	13.0243	12.9516	13.3779	12.9614	12.4777	12.9164	12.9605	13.154	12.9991	12.951	13.0802	12.7557	12.9568	13.0153	13.0146	12.7853	12.9422
9.6473	9.81478	9.28665	9.54042	10.5251	9.74757	9.89608	10.6144	10.7684	7.56814	10.9734	10.74	11.11	10.7778	10.2373	10.3193	10.7428	10.2918	10.3443	9.73739	10.5392	11.1095	10.4396	10.4741	11.0359	10.6951	11.5048
10.777	11.2468	10.7314	10.8215	10.0156	10.8242	10.93	9.16868	9.52798	9.31223	9.82705	9.8139	10.4703	9.92251	9.38561	9.86337	9.5076	9.2988	8.83234	9.46701	9.50317	8.453	9.13135	9.12979	10.0809	10.2362	9.57472
10.981	10.9549	11.2181	11.2365	10.6437	10.6133	10.629	10.9914	11.3088	7.84274	10.632	9.50891	10.6389	10.4868	10.0891	10.4774	10.717	10.6299	11.0662	11.6086	11.5409	11.0849	10.8613	10.5445	10.1674	10.2197	10.6661
12.0694	11.8758	12.4197	12.3051	11.6855	11.9714	12.147	12.4736	12.543	11.4458	12.0488	12.5295	12.7771	12.2875	12.1961	11.9909	12.1733	12.5878	12.3414	12.9365	12.6431	12.4204	12.2434	12.2447	12.1196	12.0699	12.0852
12.185	11.9441	12.217	12.1824	11.3901	11.863	11.5713	12.5922	12.636	12.7513	12.8294	12.6475	12.8319	12.6412	12.7941	12.9202	12.9117	13.3242	12.8596	13.4598	13.0509	12.4977	12.9163	12.7128	12.7013	12.9174	12.5077
10.2701	10.5475	10.2036	10.2009	10.8864	10.5222	10.4392	12.2022	11.9917	12.6397	12.6656	11.9017	9.47326	12.0927	12.2102	12.045	11.8731	11.0129	11.2347	10.3757	11.4191	11.5522	11.5028	11.7131	12.0483	11.8651	11.5228
13.4521	13.2548	13.5393	13.3098	12.6643	13.1298	13.044	12.9883	13.1855	13.0099	13.192	13.1007	13.1903	13.0528	13.1913	13.2775	13.28	12.9136	12.9489	13.0521	13.0812	12.5891	12.8541	12.9383	12.9163	12.9361	12.7271
11.5744	11.3021	11.9445	11.0497	9.71213	10.8595	10.5153	13.2635	13.7168	12.9618	13.5248	13.2664	13.3912	12.9943	12.9594	13.5241	13.1906	13.4815	12.937	13.3221	12.6549	12.2907	12.4096	12.4232	12.7347	13.3141	12.5784
9.96222	8.97704	9.58716	9.75327	8.99118	8.37793	8.64459	9.39691	10.6508	4.58602	10.5737	6.92519	8.49548	9.36169	8.71161	9.77428	10.0284	10.6968	10.6503	10.7132	10.6512	9.82458	9.88526	9.79939	8.92783	9.45264	9.12782
11.4704	10.8203	11.4989	11.2206	9.19501	10.2012	9.58575	11.7501	12.0237	9.53936	12.3466	11.0841	12.189	11.9704	11.9097	12.1425	11.9165	11.9434	11.6732	12.1988	11.7367	10.3037	11.1172	10.9656	11.4923	11.7637	11.0262
13.9397	13.8431	13.8886	13.7548	13.3798	13.6235	13.297	13.9999	14.0685	13.9498	13.9717	13.6907	13.9879	13.9734	13.4186	14.2251	14.0813	13.9785	13.7566	13.0492	13.9443	13.7947	13.9542	13.8102	14.2784	14.3432	14.2129
7.82924	8.17243	7.84417	7.45788	8.34247	7.82924	7.59329	8.34877	8.85465	4.46677	8.35853	7.70223	8.99604	8.62857	8.01552	8.59194	8.57269	9.55384	8.39087	9.09349	8.75065	7.58349	8.42699	8.02682	9.62405	8.02826	8.96205
10.6704	10.7326	10.9343	10.5387	9.15174	10.2172	10.2232	12.2489	12.4245	11.9456	12.0784	12.3767	12.3947	12.2301	12.0757	12.4227	12.2466	12.2278	11.6655	12.0035	11.9174	11.5135	11.7471	11.9134	12.1397	12.2487	11.9512
9.87661	9.93559	9.87661	9.91942	9.87661	9.80623	9.87661	11.0084	11.1491	10.5831	11.5103	11.1537	11.5365	11.1542	11.0498	11.0245	11.3033	11.5011	11.1227	11.3384	11.4426	11.4196	11.3924	11.1604	11.2664	11.2467	11.0379
11.2286	11.2416	11.1278	11.0763	10.922	11.0705	11.0321	12.6987	12.9721	12.192	12.9857	12.9113	13.0531	12.8041	12.5545	12.7931	12.7869	13.0241	12.6139	12.6259	12.6859	12.7709	12.5869	12.685	12.9586	12.9031	12.7633
7.94273	8.38453	8.78787	8.75333	9.5846	9.28364	9.51811	10.9892	10.9692	9.98719	11.313	10.5523	9.92499	10.7196	10.6293	10.79	10.7617	10.9141	11.411	10.9905	11.3477	11.9579	11.5529	11.3968	10.7182	10.7275	10.5729
9.04517	8.85944	8.09149	8.71299	9.21683	8.85944	8.83016	8.36	10.0235	9.61588	9.4594	7.87737	5.89231	8.82361	9.38399	9.78892	10.1404	8.97353	8.53956	8.90845	8.16122	8.58003	8.5665	8.96499	9.44328	9.13407	8.87706
8.80975	8.71459	8.14513	8.66926	10.4799	9.98362	9.71535	10.9534	10.9053	11.4373	11.3372	9.88511	8.02457	10.9699	10.5681	11.0072	10.9692	10.1263	9.73284	9.75421	9.97716	10.8802	10.8923	10.8516	10.9688	10.4913	10.7597
13.4367	13.4839	13.4506	13.5415	13.3108	13.4506	13.3865	12.7415	12.7397	12.6362	12.821	12.8252	13.1568	12.833	12.4501	12.799	12.9815	12.9214	12.8869	12.6853	13.0236	12.5839	12.7975	12.696	13.0021	13.0201	12.857
6.16138	5.07715	5.48695	6.39302	6.75874	6.01282	5.36979	4.80822	6.32598	5.08206	5.61381	5.08206	5.41047	5.08206	5.08206	6.16814	7.56803	5.86337	5.95461	6.35105	6.46254	6.4955	6.10582	5.78671	5.28346	4.91087	5.56542
9.27217	9.27217	8.95266	9.2105	9.66655	9.27217	9.5766	9.22053	8.82987	8.4204	8.0521	8.35745	7.56668	8.5701	9.07663	8.30853	9.07297	8.41025	8.5904	8.48701	9.06053	9.01233	8.48533	9.42484	8.59539	8.25614	8.75059
11.2091	10.6756	10.8524	11.0603	11.1527	11.0603	11.2733	10.1598	9.89244	9.58035	9.95639	10.8144	9.63564	10.2115	10.4132	9.60837	10.2829	9.97826	10.2501	9.74166	10.2156	9.40351	9.84095	10.0178	9.58232	10.0099	10.1046
10.6916	10.8019	10.1812	10.7258	11.2751	11.0303	10.6517	10.3921	10.8176	10.9372	11.2161	10.9075	11.1798	11.1513	11.38	11.2857	11.5672	10.9432	10.9642	11.2316	10.6622	11.1325	11.0625	11.1	10.772	11.0963	10.7277
9.98584	9.90443	9.24336	9.71684	11.282	10.9166	11.0481	10.3072	10.6391	10.5652	11.0389	10.686	10.6885	10.6237	11.0055	10.6587	10.594	9.99568	10.0251	10.0113	9.87438	10.82	10.4138	10.4369	10.7083	10.432	10.342
12.5783	12.3248	12.3459	12.3505	11.8325	12.039	12.1885	11.6371	12.1007	11.0046	12.137	11.8818	12.3539	12.0862	11.9539	12.2657	12.3419	12.384	12.093	12.0533	11.8945	12.1228	11.8813	11.9105	11.7785	11.9644	11.6527
11.1815	10.7575	11.4255	10.9506	11.9082	11.8727	11.6116	12.1055	11.7978	11.724	12.6495	11.9109	11.7063	11.8211	12.5011	11.2543	11.4782	10.261	9.92794	9.61678	10.5321	11.0023	10.8552	11.8151	11.7253	12.0804	11.3221
8.05647	7.34757	8.12766	9.14193	8.88163	8.75889	8.72932	7.97895	7.96792	7.72865	8.27533	7.82034	7.95308	7.35265	8.07066	8.07032	8.17924	8.54844	7.65396	8.78126	8.45128	8.95239	8.76217	8.18534	7.60545	7.7057	7.41562
13.4155	13.3164	13.4155	13.727	13.4725	13.3873	13.4009	10.2332	10.3835	10.3548	10.3279	10.2848	10.863	9.60173	9.70753	9.88585	9.90087	9.92353	9.826	10.0879	10.0022	9.48008	9.71154	9.71857	9.50259	9.61774	9.45385
11.5266	11.1852	11.355	11.213	10.2756	11.1526	10.7708	11.3481	11.5163	9.9305	11.5549	10.9855	12.031	11.5903	11.4956	11.4725	11.5334	11.7495	11.3751	11.8586	11.3785	10.5579	11.2117	10.9665	11.5762	11.6663	11.2791
12.6549	12.7329	13.0647	13.0846	12.8814	13.0073	12.8503	12.3396	12.3053	12.4653	12.7216	12.7618	12.9945	12.4801	12.3272	12.7381	12.7381	12.7675	12.7044	12.8848	12.9086	12.7823	12.8445	12.7737	12.5053	12.579	12.3955
12.5252	12.5513	12.6711	12.5961	11.5405	12.1917	12.0156	12.2867	12.4514	11.7891	12.0864	12.1923	12.5278	12.2835	12.0743	12.373	12.1015	12.292	12.0476	12.4458	11.9706	11.272	11.7783	11.4944	12.0069	12.2287	11.8594
12.9675	12.6258	12.8291	12.6604	12.2401	12.3542	12.5749	12.4057	12.4625	11.6927	12.6037	12.1831	12.7116	12.5812	12.3475	12.601	12.6963	12.7253	12.3677	12.529	12.4953	12.2474	12.2319	12.3313	12.3388	12.4058	12.1874
6.27264	5.70095	5.24545	7.01739	6.34049	6.68933	6.18983	6.32405	7.26552	5.57163	7.94903	6.8423	5.9293	7.34314	6.76496	7.38523	6.58868	9.90344	8.02782	9.13047	9.08411	8.71737	10.5478	8.1959	6.48301	6.56953	6.6299
9.2693	8.87124	8.62113	10.0146	10.3207	10.2753	9.88578	8.93	8.93	10.8527	9.72436	9.74461	8.93	9.09915	9.0907	9.51491	8.09222	11.011	9.76641	10.1456	10.3775	10.659	11.6904	10.0042	8.8235	8.53988	8.6715
11.9413	11.5667	12.2858	11.6276	10.4751	10.9	10.9959	10.3658	10.2035	9.70736	10.241	10.1919	10.0384	10.5332	10.4994	10.2951	10.3127	11.5127	10.5651	11.8408	10.9826	10.2569	10.4603	10.5535	11.0449	11.2126	10.7482
12.9353	12.8209	12.5595	12.698	12.7626	12.8421	12.9463	12.6555	12.5631	12.6365	13.0494	12.8273	12.9778	12.6391	12.4204	12.408	12.5375	12.4753	12.3082	12.355	12.5023	12.1252	12.0997	12.4529	12.7463	12.5851	12.8781
13.3502	13.2162	12.4936	13.0629	13.1937	13.2081	12.7745	12.0828	12.5037	12.2665	12.5683	12.1926	12.4526	12.294	12.9128	12.969	12.4081	12.1902	12.1232	11.8578	12.1477	12.4043	12.1493	12.423	12.5573	12.4456	12.5487
12.8535	12.4061	12.8109	12.8026	13.464	13.3366	13.633	13.3243	13.461	13.7498	13.7802	13.6014	13.6458	13.5168	13.9138	13.9631	13.7896	13.2865	13.2634	13.3884	13.4264	13.9517	13.8307	13.8629	13.7803	13.6956	13.5516
11.6776	11.7047	11.9804	12.0006	12.137	12.1373	11.9804	12.949	13.0246	12.0418	13.0164	13.1973	13.0815	12.7779	12.2783	12.7699	12.6229	12.5008	12.1642	12.8987	12.5098	13.0598	12.943	12.5056	12.2251	12.4015	12.4093
12.6127	12.9735	12.722	12.7442	12.7442	12.6527	12.7442	11.4746	11.5581	10.2946	11.2464	10.5952	9.47278	12.0135	11.4403	11.5258	11.8437	10.4865	10.3659	9.21721	11.1212	10.9142	10.2802	11.3129	11.5228	11.4541	11.5898
11.0434	11.4526	11.2358	11.4979	11.6445	11.5419	11.6924	12.6319	12.3894	12.2567	12.5906	12.7747	12.3705	12.8991	12.4719	12.2246	12.442	10.6261	9.95371	9.7078	11.0725	11.2534	10.7462	11.6	11.9108	11.9819	12.3131
5.83794	4.46703	4.61971	4.9482	4.60739	5.06968	5.30606	8.22029	8.7122	4.97931	8.22421	6.33337	1.716	8.88249	7.35883	8.65605	8.49815	6.69848	5.77594	5.22236	6.33063	6.70106	6.28374	6.51244	7.53837	7.64781	6.98344
11.9027	11.6765	12.0552	11.3922	10.809	11.3399	10.8934	12.5542	12.5571	9.73589	12.8021	12.1596	12.7297	12.4446	11.4679	12.6653	12.6822	13.6399	12.7113	12.6136	12.7141	11.5292	12.7073	11.9872	12.2749	12.4589	11.7575
13.3133	13.0687	13.3838	12.9808	12.4695	12.8971	12.5584	13.2951	13.2924	13.5039	13.7558	13.555	13.7631	13.6411	13.4152	13.8098	13.5985	13.9947	13.5339	13.5299	13.7406	13.4008	13.5541	13.3551	13.7702	13.7653	13.5463
13.7484	13.7152	13.7318	13.6951	13.2588	13.5738	13.2876	12.8792	12.932	12.5372	13.2831	12.8292	13.2325	13.1155	12.5567	13.1955	13.1593	13.6001	13.3274	13.3112	13.6122	12.9528	13.3716	13.2122	13.5206	13.3712	13.4073
8.94015	8.7374	8.49405	8.04837	8.56548	8.4708	8.02364	10.5466	10.643	5.33068	10.8639	9.3297	10.4903	10.4635	8.83791	10.5859	10.7215	12.7495	10.694	10.5855	10.8684	8.13134	10.804	9.50043	10.5527	9.84201	9.47201
12.4118	12.3497	11.9314	12.056	12.9462	12.7988	12.6695	12.7091	12.737	12.6707	12.8631	12.6845	12.774	12.7235	13.1464	12.8403	12.8186	11.8165	11.9568	11.8568	11.9432	12.5413	12.2729	12.3638	12.559	12.5081	12.7346
8.9108	8.91606	8.72639	8.09229	9.74219	9.30583	9.24428	9.93106	9.94375	10.887	10.3397	10.8971	9.92888	10.2053	9.53625	10.8125	10.9375	9.48608	9.53132	9.01156	9.16952	10.1446	9.58918	9.6629	9.89245	10.0386	10.2899
9.073	8.61391	10.9024	10.4019	8.15177	9.63364	9.43748	10.5638	9.90707	8.93645	10.3734	10.4112	8.82304	9.78328	9.98215	9.33576	8.86535	9.74858	9.38555	10.0748	9.57895	9.53656	9.974	9.20651	7.8463	8.2326	8.18076
13.1682	13.6875	13.498	13.5024	13.512	13.5024	13.5024	12.7411	12.9049	13.1987	12.922	12.8312	12.7886	12.8259	12.457	12.9741	12.9883	12.6586	12.781	12.9159	12.8434	12.815	12.7615	12.8569	12.9321	12.8669	13.0695
6.1128	6.32823	4.80135	6.04566	7.15253	6.90773	7.11011	7.48186	7.88352	5.38992	7.36489	4.55118	3.13371	7.35388	6.58509	8.40495	7.62114	6.09987	6.6535	7.15551	6.84432	7.82871	8.37577	7.62305	8.01973	7.92104	7.45639
10.6655	10.12	10.4281	10.1185	10.9988	11.0129	11.206	11.9771	11.7788	12.5209	12.6137	10.6161	11.9792	12.0472	12.3795	11.9934	12.1753	11.8992	11.3761	11.7296	11.726	12.5055	11.8874	12.2944	12.2211	12.0541	12.3505
7.94248	6.8288	7.34139	8.37804	8.58639	7.96377	8.34277	9.04202	9.2579	6.66129	9.45419	6.75341	5.04257	9.75219	9.65002	9.69666	9.43423	10.0076	8.78301	10.1979	10.1263	10.1933	10.8783	10.5421	8.09384	8.59581	6.59594
8.98446	9.23653	8.37304	9.02819	9.89153	9.49968	9.45936	9.71419	9.97579	10.8396	10.2699	9.61455	7.58959	9.94287	9.79038	10.7606	10.3103	8.89652	9.08478	8.78135	8.859	10.0122	9.48543	9.31874	9.63495	9.91977	9.33142
13.9741	13.8037	13.7765	13.8424	13.4974	13.8143	13.5911	13.7942	13.9296	13.7996	13.803	13.8639	13.7702	13.802	13.8155	13.8365	13.5243	14.0154	13.9281	13.8307	14.1418	13.7582	13.9936	14.1653	14.06	13.825	13.9827
13.5612	13.7636	13.1729	13.0363	14.1526	14.0953	14.1138	14.2505	14.7519	14.1499	14.7208	14.6977	14.7018	14.5324	14.3888	14.4115	14.3339	13.7495	14.0098	13.2805	13.5929	14.3894	14.0248	14.2722	14.4585	14.4596	14.5523
10.9897	11.3274	10.8125	10.7602	12.5854	12.3743	12.4585	11.8345	11.9713	12.2687	12.5085	11.7347	11.3297	11.9863	11.9661	12.0682	12.2129	11.0789	11.1596	11.2731	11.0812	11.725	11.7147	11.7943	11.8472	11.9383	12.0689
13.3377	12.9819	12.8146	12.9996	13.0938	13.0713	12.7797	12.3212	11.9663	12.4835	12.7328	11.9994	12.3287	12.3353	12.6755	12.4404	12.4972	13.0084	12.8291	12.6557	12.8171	11.8951	12.5584	12.5507	12.5436	12.7545	12.7962
12.8515	12.9928	12.9606	12.8033	13.1314	12.9821	12.9606	12.6835	12.7009	12.629	12.6902	12.588	11.5507	12.629	12.5783	12.629	12.629	12.5481	12.784	12.3452	12.784	12.784	12.611	12.784	12.784	12.784	12.784
12.8889	12.7765	12.4136	12.5801	12.9647	12.6523	12.3525	12.5233	12.4866	11.5271	12.6349	12.6601	12.9828	12.4484	12.6797	12.5687	12.4484	13.1701	12.7577	12.6189	12.6759	12.6449	12.4702	12.294	12.4513	12.7353	12.5832
10.1009	10.2	10.0431	9.71864	10.8551	10.1671	10.603	12.0644	12.1337	10.5633	12.0273	11.0833	7.22318	11.9642	11.5624	11.9	11.9211	11.9029	11.2114	10.7541	11.2088	11.1419	11.9663	12.0323	12.2253	12.1808	12.5365
12.8631	12.9735	12.7408	12.758	13.3324	13.5385	13.5111	13.7139	13.6907	13.1882	13.4356	13.8418	13.4349	13.6385	13.2456	13.141	13.1018	13.4375	13.0735	12.8964	13.3436	13.8392	13.5003	13.8134	13.8293	13.6378	13.7396
8.04505	8.30326	8.28721	8.08023	9.80185	9.18816	9.50032	9.71838	9.7894	8.49211	9.6623	9.06497	7.3387	9.62167	9.80087	9.13853	9.58547	9.03031	9.05784	8.63881	9.35191	10.2938	9.80172	10.0229	9.3712	9.35972	9.34425
8.60664	8.06988	7.9836	7.97349	10.0832	9.4252	9.9907	9.32524	9.27052	9.63452	9.99862	10.1182	7.50636	9.5336	9.24063	8.49704	9.04345	7.86769	8.24004	7.42463	8.41448	9.41237	8.58997	9.44813	9.46444	9.43174	9.17537
10.8121	10.538	10.9906	10.9312	11.9569	12.1087	11.9333	12.4399	12.3184	12.5134	12.3589	12.5876	12.5652	12.2938	12.3899	12.4399	12.4204	12.6615	12.4381	12.1192	12.7079	13.158	13.352	13.0361	12.1461	12.6724	12.8324
10.6197	10.9653	9.98702	10.6285	11.8481	11.2586	11.3395	10.3132	11.0423	11.1093	10.9839	10.6642	10.4239	10.5462	10.1496	10.6188	10.9538	10.825	10.7414	10.5061	10.8115	11.4011	11.3959	11.0611	11.0163	10.9951	11.006
13.694	13.7503	13.3995	13.3318	13.5336	13.595	13.6805	13.2919	13.2582	13.0129	13.7166	13.521	13.574	13.3963	13.2633	13.1405	13.2216	12.796	12.7987	12.3873	12.6504	12.2916	12.4589	12.8466	13.2743	13.3044	13.3512
13.0029	13.0179	12.9712	13.1409	13.1386	13.1931	12.924	12.8848	13.0872	13.3108	13.1125	12.8213	13.1731	13.0719	13.4647	13.3699	13.4796	13.032	13.167	13.3983	13.0269	12.8897	13.0391	12.8439	12.7853	13.0991	12.7244
8.86087	8.96099	8.83782	8.58793	8.70313	8.63144	8.71695	8.84042	9.1558	7.62203	9.41515	8.25466	7.66582	9.10266	8.41537	9.52901	9.20859	9.46358	8.68982	8.70035	10.056	10.1649	8.91655	9.40195	8.89871	9.12284	9.2906
13.2871	13.3338	13.2731	13.9353	13.9109	14.2001	13.568	13.7961	13.8689	14.3549	14.2692	13.8045	14.4422	14.0604	13.6839	14.7553	14.6158	13.8866	14.0847	14.0198	13.8322	13.8156	14.0949	13.9263	13.6297	14.4787	14.2062
12.0454	12.2521	12.0644	12.0454	12.0454	11.8751	11.9354	11.4557	11.4284	11.8915	11.7555	11.4821	11.354	11.541	10.8453	11.7376	11.4295	11.694	11.4083	11.2923	11.9166	11.3007	11.4961	11.5437	11.3267	11.715	11.9803
12.814	12.9099	12.7024	12.8206	12.8031	12.8523	12.9202	11.5527	11.7723	11.5038	11.8449	11.7947	12.0501	11.8447	11.7564	11.7056	11.9712	12.1132	11.9322	12.038	11.8782	12.0205	11.9537	11.9483	11.8478	11.847	12.0548
12.8403	12.7846	12.6578	12.6945	11.9002	12.2383	12.1126	12.3712	12.5764	12.2697	12.4926	12.4183	12.8326	12.5859	12.15	12.5518	12.6851	13.1718	12.8625	13.1105	12.9708	12.5002	12.8397	12.774	12.4409	12.6097	12.4054
11.2838	11.433	11.338	11.2693	10.8788	11.0333	11.2838	11.3828	11.6959	10.7974	11.6492	11.3049	11.7439	11.5124	10.6178	11.5915	11.6694	12.6212	11.9852	11.5755	11.9638	12.1045	11.9098	11.8123	11.1601	11.0998	11.2197
8.34476	8.4776	8.83779	7.87592	7.87592	8.34476	8.36819	10.6194	11.0174	10.2644	11.0786	10.9637	10.1508	10.7276	11.1278	10.2548	10.4249	10.5594	10.9074	11.5476	10.0874	11.1606	10.6253	10.1725	10.3669	10.5053	9.98642
6.4265	5.77579	5.49598	5.78465	8.85213	8.06431	7.02044	6.72386	6.99465	5.63229	7.16007	4.51466	4.14789	7.17396	6.41238	8.16151	7.41477	4.83862	4.69946	4.97188	5.42532	5.42532	5.45274	5.93301	6.84355	6.79483	6.59654
7.58243	6.75198	6.6538	6.77434	7.13583	6.66157	6.75103	8.49741	9.0609	5.40106	8.46778	7.82186	7.82186	8.77896	9.00061	9.56379	8.94014	7.67092	7.67092	7.76861	7.67911	7.67092	7.67092	7.67092	7.67092	8.33784	7.67092
13.771	13.4915	13.825	13.4961	12.8321	13.3501	13.4272	13.4665	13.748	13.4852	13.6177	13.5706	13.9073	13.5859	13.5268	13.6998	13.9233	13.7662	13.3239	13.4103	13.497	13.0655	13.183	13.5914	13.7248	13.8075	13.6239
13.0002	12.9961	12.5997	13.0977	13.0016	12.9961	12.7816	12.8809	13.2961	13.3314	13.3071	12.6383	12.3425	12.7687	13.0223	13.3333	13.2795	12.6366	12.6147	13.1665	12.8153	12.496	12.588	12.6934	12.9909	13.1346	11.8548
9.48041	8.77626	8.49751	9.07235	9.49972	9.03322	9.23709	6.93376	7.30288	7.62349	7.19874	7.68469	6.67312	7.39214	8.02947	7.6787	8.08925	6.95577	7.09975	6.40911	7.37428	6.89854	6.94248	7.72551	6.92204	7.26607	7.85884
11.3032	11.2544	10.9413	11.348	11.4703	11.5425	11.4873	11.9259	11.6171	11.7475	11.9128	11.9833	12.0504	11.7431	12.2812	12.2123	12.1005	11.2271	11.5861	11.3027	11.4476	11.5001	11.7644	11.6732	11.7893	11.7503	11.7245
7.48943	7.90419	6.48785	8.09445	9.17466	8.49485	8.84287	10.3649	10.4938	11.021	10.7358	10.0402	7.90004	10.6481	10.2191	10.8209	10.8365	10.5312	10.1603	10.7913	10.5808	10.9981	11.4021	10.7287	10.3305	10.3486	10.17
12.6057	12.7055	12.3524	12.4649	12.5347	12.3665	12.4549	12.4887	12.7552	10.0004	12.3044	11.9047	11.8397	12.4342	12.4476	12.3921	12.3381	12.8001	12.6283	12.5542	12.3315	11.8092	12.3057	12.4701	13.0325	12.9988	12.7936
13.7368	13.7435	13.7703	13.8067	13.5102	13.6554	13.6015	13.7691	13.8445	12.7729	13.4976	13.2746	13.5426	13.6921	13.6159	13.4377	13.3848	13.6945	13.4185	13.9872	13.6632	13.4905	13.477	13.8688	13.9285	13.8236	13.8631
12.5693	12.4543	12.3383	11.9206	12.3918	12.1157	12.1171	11.5143	11.971	11.6916	12.2772	11.874	12.2937	11.9522	11.0176	11.8075	12.1084	12.2327	12.0746	11.3988	12.1111	12.1643	11.5888	11.9042	12.1145	12.2338	12.2482
10.1465	10.5186	11.1113	10.6996	10.9719	11.5124	11.5681	11.2261	11.332	10.5643	11.4192	11.3901	11.1258	11.2766	10.8422	11.1669	11.015	11.4534	11.3307	11.4656	11.8526	11.4459	11.9877	12.1516	11.4173	11.7465	11.3121
8.96866	9.15324	8.9563	9.28241	10.0049	9.80264	9.5854	9.6325	9.61316	9.05913	9.782	9.47793	9.60074	10.1742	9.40076	9.96904	10.2299	9.61976	9.4557	9.42708	9.94672	10.0354	10.2893	10.2422	9.84739	10.2168	10.3546
10.7322	10.6462	10.5226	10.8916	10.8303	10.4497	10.6054	8.6447	8.32693	8.1781	9.03177	8.90327	8.32693	9.10207	8.32693	8.80828	9.50607	9.05204	8.92709	8.96671	9.37231	8.92316	8.92586	9.13996	8.63149	8.76758	9.02637
11.388	11.5176	11.4741	11.2026	9.87195	10.7074	10.329	9.63231	9.35239	10.2859	9.0637	10.0441	10.5458	10.2781	11.4072	10.0939	9.78003	10.1825	9.6109	10.1499	9.2237	8.48295	9.47397	9.40688	10.9147	10.9058	9.76352
11.2096	11.4484	11.7759	11.1217	10.0811	10.917	10.769	12.2591	11.9701	12.1534	11.361	12.3868	12.4363	12.4517	13.1137	12.1318	11.9158	12.2163	11.805	12.2112	11.7716	11.8756	11.818	12.0299	12.3872	12.3128	12.3213
9.88542	9.38059	9.90535	9.77593	9.07236	9.23705	9.60925	9.94506	10.0261	10.3377	10.1145	10.4898	10.1221	9.98112	9.33208	9.84113	9.83614	10.1734	9.50013	10.1696	10.2175	10.6514	10.0503	9.87994	9.64325	9.53197	9.83477
3.77215	2.66206	3.77215	2.92264	4.84418	3.77215	4.69257	3.02723	3.19752	3.62944	3.79917	4.84565	4.44436	3.22104	3.0067	2.93688	3.02781	2.26127	2.26127	2.26127	2.32591	3.97677	2.50013	3.22974	3.19072	2.68635	2.75873
14.3252	14.4051	14.1513	13.9373	14.4621	14.4555	14.53	14.1172	14.0829	14.24	14.1885	13.9824	13.7867	14.1758	14.0731	14.1262	14.1565	13.6627	13.7097	13.5914	13.6496	13.8628	13.7939	13.9802	14.396	14.3107	14.5507
9.92672	10.1234	10.4781	9.87593	9.507	9.92672	9.79066	8.03412	7.95802	8.87718	7.74635	9.09986	8.70567	8.35309	7.71899	7.75392	7.63005	8.05841	8.30013	7.99731	8.19096	7.95131	7.61238	7.81728	8.20621	7.78644	8.08716
12.4699	12.416	12.5931	12.4021	11.9219	12.2523	12.299	12.3643	12.221	10.9111	11.9813	12.4955	12.132	12.0126	11.7699	11.7232	11.6022	12.2725	11.9637	12.0414	12.2956	11.8486	11.9197	12.2522	12.1788	12.0711	11.8547
11.5408	11.2855	11.5779	11.423	11.0096	11.3467	11.8722	11.1587	11.14	9.12752	10.8684	11.0688	10.7881	10.688	10.5093	10.4751	10.104	11.0227	10.8247	10.1375	10.4469	10.144	10.066	10.433	10.7528	10.6397	10.154
11.7977	11.8024	12.6439	12.1865	11.4526	12.2622	12.0824	12.5074	12.5152	12.0803	12.5032	12.6087	12.506	12.513	12.0432	12.3033	12.3395	12.6218	12.7288	12.0411	12.7794	12.4201	12.6741	12.5861	12.2436	12.362	12.2211
10.7837	10.8065	10.4289	10.7364	10.8615	10.7546	10.773	10.7743	10.9225	10.7335	11.2371	10.9195	11.3281	11.0959	11.2879	11.0941	11.0383	10.833	10.9115	11.0954	10.9806	11.1744	10.9413	11.0017	10.8906	10.8246	10.6738
7.6836	7.72054	6.94185	7.70911	8.40087	7.72054	8.00361	8.84391	9.03592	7.02594	9.57844	7.40825	4.00029	8.88176	8.65463	9.17178	9.00877	8.39075	8.16714	7.92949	8.17476	9.13056	8.10251	8.05879	8.37913	8.32722	8.48793
11.6546	11.0189	10.9931	11.2191	12.2083	11.7605	11.66	13.0302	13.5984	12.9869	13.3549	13.0954	13.3633	13.0087	13.6242	13.7938	13.5466	12.0661	11.3261	11.5117	11.7164	12.4104	12.1104	13.0935	12.8759	13.286	12.7553
10.9611	11.2925	10.3479	10.4916	11.6791	10.6884	10.8707	11.3023	11.6536	11.7133	11.8824	11.4923	11.2225	11.6141	11.629	11.5933	11.4584	10.8289	10.9557	10.3796	11.0569	11.4497	10.8315	11.1851	11.5906	11.2668	11.5845
12.0355	11.8875	11.9904	11.6709	10.929	11.3196	11.1902	11.1545	11.5377	9.87565	11.5099	10.8148	11.8171	11.3996	10.643	11.7457	11.8054	11.9654	11.2995	11.8259	11.4294	10.8199	11.0881	11.4412	11.5403	11.0496	11.2766
12.6141	12.6007	12.3166	12.4401	12.7374	12.6223	12.3296	11.0904	11.5109	11.5495	11.3932	11.2653	12.0361	11.2494	11.232	11.5513	12.0977	11.3494	11.112	11.1716	11.1837	10.8116	11.098	11.3746	11.4956	11.7654	11.566
7.83817	8.76589	9.0513	9.18692	8.15078	8.76589	8.48846	10.11	10.4049	9.45	10.898	10.0378	10.2477	10.384	9.6684	10.8043	10.6885	10.5682	10.7607	10.959	11.0952	11.1369	10.9045	10.835	9.1933	10.1326	10.4374
13.0177	12.9681	12.8317	12.9763	13.2487	13.1997	13.042	12.5939	12.3993	12.3632	12.6799	12.3904	12.6542	12.3905	12.3774	12.6268	12.5652	12.4033	12.5737	12.709	12.4344	12.7251	12.5655	12.2775	12.281	12.4073	12.3123
9.81124	9.55111	8.97654	9.50311	10.4498	9.50411	8.89173	8.79765	8.93201	6.66474	8.93201	7.53877	5.69363	8.25553	8.93201	8.68055	8.82293	8.98839	9.22852	9.42455	8.72435	8.40522	8.56125	8.41519	8.55073	7.93305	8.76247
12.6664	12.674	12.8693	12.6664	12.4935	12.6498	12.5045	13.0854	13.1838	13.0549	13.2976	13.3555	13.5363	13.2309	12.8402	13.2354	13.3164	13.8706	13.6186	13.137	13.4974	13.4346	13.3695	13.576	13.0601	13.2359	13.5572
13.1762	13.2338	13.2423	13.5211	13.4136	13.2423	13.1738	11.5412	11.579	11.753	11.9788	11.6107	11.9204	11.6693	11.2494	11.6034	11.6367	11.791	11.127	11.7603	11.7578	11.6742	11.7291	11.5687	11.3163	11.4767	11.4387
14.6124	14.7087	14.4544	14.1913	14.7047	14.6316	14.634	14.2345	14.1614	14.002	14.2178	14.1878	14.3512	14.271	14.0356	14.1208	14.1556	14.0923	14.2069	13.935	14.0173	14.0173	13.9106	14.1856	14.3125	14.3702	14.3407
11.0189	11.1314	11.3584	11.3791	10.588	10.7195	10.8138	9.9307	10.1093	9.58821	10.2826	9.13526	8.84233	10.3488	10.1093	10.3275	10.4294	10.4087	9.7241	10.8899	10.08	9.64696	10.1423	9.52936	9.67044	10.3241	9.76925
9.64105	10.2355	9.01124	9.3983	11.0126	10.4096	10.8297	10.5545	10.5063	11.118	10.8335	9.25939	7.44147	10.4429	10.2237	10.7117	10.4597	9.10588	9.96418	8.93658	9.53499	10.5081	9.75217	10.0894	10.5505	10.0894	10.5282
10.9228	10.9744	10.7903	10.7329	11.0342	11.015	11.1434	9.24966	9.04007	9.76803	9.48999	9.50449	9.62497	9.5443	9.6215	9.21147	9.2866	9.80761	10.1737	8.90223	9.68935	9.76564	9.4411	9.46767	10.1171	9.76807	9.58581
13.3282	13.1145	13.5376	13.5371	12.7966	13.2073	12.9506	12.6884	12.6228	12.3792	12.3304	12.8205	12.5051	11.695	11.25	11.9032	11.8414	12.4416	12.0406	12.473	12.0931	12.0547	12.0505	11.5267	11.4178	12.1184	11.5903
8.7903	9.15338	10.8091	9.81549	10.2155	10.447	10.6942	12.2192	11.9314	11.7037	10.2655	12.2141	10.9027	11.7261	11.8209	10.9766	10.343	10.0811	10.5867	9.74568	10.4825	11.5655	10.8073	11.0228	10.8671	11.1624	11.0219
12.067	11.9681	11.831	11.4762	10.9522	11.4503	11.2635	11.5772	11.7373	11.5805	11.807	11.5388	11.6496	11.6837	11.3394	11.7079	11.6629	11.7719	11.4352	11.1531	11.1972	11.022	11.0241	11.0882	11.3553	11.4664	11.438
6.33205	6.17663	6.06545	6.00995	6.38328	5.81622	5.37658	7.47704	7.34539	3.98455	8.28844	6.72527	7.35813	7.63835	6.63333	7.23901	7.42887	9.1408	8.97251	9.18405	8.98238	8.23182	8.89327	8.24823	7.04747	8.27743	7.62302
12.3242	12.4368	12.3788	12.5671	12.2512	12.127	11.8112	10.707	10.5566	10.7046	11.1702	10.9584	11.4964	11.1657	10.5336	10.7634	10.908	11.8435	11.4417	11.7289	11.6045	10.9528	11.446	11.3536	10.9708	11.2349	11.0775
11.3933	11.2473	11.2968	11.1405	11.9988	11.7461	11.7504	11.1978	11.4299	12.1494	11.5627	11.6418	11.5195	11.2105	11.3574	11.5065	11.3077	10.7245	11.04	10.9294	10.8295	11.6536	11.1631	11.2679	11.3451	11.3418	11.3084
13.5781	13.6781	13.405	13.0903	13.8748	13.9639	13.8598	13.3456	13.6522	13.608	13.6464	13.6713	13.506	13.8242	13.469	13.4529	13.3972	13.1259	13.111	12.972	12.9107	13.1743	13.2069	13.3013	13.6957	13.8004	13.8607
14.8878	14.9327	14.6273	14.6735	14.9703	14.8878	14.9403	14.8239	14.7817	14.7997	14.8232	14.6642	14.6598	14.9209	14.8452	14.7394	14.8152	14.5755	14.7626	14.5584	14.6364	14.9393	14.746	14.969	15.0276	14.9367	15.0254
14.6518	14.6911	14.6523	14.3287	14.6407	14.683	14.7081	14.7204	14.7997	14.81	14.7164	14.7214	14.8467	14.8136	14.7043	14.7363	14.8021	14.601	14.6867	14.2755	14.4889	14.5665	14.3826	14.6505	14.8536	14.9042	14.9
12.4344	12.1548	12.8836	12.3691	12.2663	12.2635	12.2351	13.5356	13.4111	13.5353	13.5485	13.2208	13.2584	13.4454	13.4138	13.2054	13.242	13.3134	13.1701	13.0739	13.2909	13.1367	13.0125	13.0841	13.0346	13.1621	13.0325
11.0126	11.5884	10.9869	10.6547	10.4841	10.878	10.798	9.19061	9.97429	9.866	9.91717	9.77549	9.70177	9.73148	9.67944	9.86046	9.93936	9.58488	9.74269	9.27276	9.16701	9.13594	9.17024	9.6179	10.3448	10.1467	10.2298
7.3112	7.77946	7.52455	7.4676	8.59614	7.71803	8.24444	9.20819	9.19339	8.76308	9.29389	8.8399	8.83946	8.80706	7.78592	8.92322	9.0385	9.06471	9.68479	8.5408	9.29984	9.74307	8.84538	9.4529	9.18863	9.33185	9.07397
12.8258	13.1126	12.46	12.8547	12.9237	12.9124	12.6755	10.0728	10.3812	10.6998	10.4976	10.5877	10.1509	10.1221	9.77147	10.4897	10.6395	10.6416	10.889	10.4535	10.7137	10.5148	10.6264	10.6643	10.3948	10.6492	10.6763
5.28618	5.66285	5.40718	5.40718	5.53678	5.23929	5.43483	8.35917	8.56827	6.03692	8.93424	7.85839	8.05994	8.47301	7.82279	8.54382	8.65753	8.74605	7.98924	8.46596	8.32993	8.20974	8.70872	7.99075	8.5863	8.33303	8.70872
10.0259	10.0259	10.0259	10.3797	10.0259	9.9499	9.98967	10.9649	11.1272	8.86852	11.5139	10.7988	11.5069	11.3923	10.7149	11.3159	11.4485	11.4686	11.0518	11.3071	11.5837	10.0698	10.8962	10.7783	11.002	11.203	11.0322
7.68617	7.78218	7.84997	7.34413	7.99366	8.50954	8.44567	3.81734	3.81156	3.81734	3.81734	3.81156	3.81734	3.81734	3.81734	3.81734	3.81734	4.04263	4.22189	4.08434	3.79329	4.39279	4.48616	4.65373	3.81393	3.86346	3.44371
13.8726	14.0875	13.8588	13.8051	14.5817	14.5801	14.4185	14.0088	14.0097	14.1608	14.1454	13.8489	12.9208	14.1895	14.2442	14.1553	14.2379	13.2549	13.6173	13.5859	13.3897	13.9078	14.0371	14.1496	14.3056	14.2796	14.4126
12.8497	12.4006	12.5999	12.4566	11.8781	12.5347	12.3864	11.7641	11.9533	11.9233	11.9075	12.0127	12.2751	12.2628	11.9592	12.1753	12.1372	12.5157	12.349	12.5245	12.2311	11.9799	12.3297	11.9601	12.2749	12.1173	12.3016
10.503	10.9084	10.503	10.5254	10.5222	10.3577	9.62276	6.49094	8.69362	6.98352	8.92597	5.50312	4.36285	8.05822	4.45602	7.76377	7.82582	8.16849	8.54479	8.54634	8.75434	8.66876	7.4324	7.73187	7.35516	8.0471	7.59176
11.6201	11.7395	11.7683	11.8945	10.6764	11.395	11.3597	11.9245	12.0612	9.64124	12.353	12.0503	12.4777	11.9884	11.4303	12.0702	12.1705	12.8989	12.1986	12.9907	12.459	11.0505	11.895	11.9367	11.8557	12.0154	11.8322
10.2525	10.2464	11.1263	10.4583	9.09678	10.0159	10.0903	10.4039	10.9252	8.82395	11.1146	10.116	11.0781	10.7341	9.85161	10.7847	10.9589	11.8114	11.3179	12.1399	11.5314	10.7505	11.2134	10.7367	10.4482	10.4757	10.2535
7.59248	6.32503	7.00112	6.36606	5.20551	5.78885	6.13114	8.02931	8.22846	2.44977	8.84045	7.54803	7.68103	6.38568	3.81559	7.34426	7.41357	10.2731	9.23449	9.7425	9.35884	6.34985	8.15383	7.79114	5.27147	6.91456	7.1985
8.38034	8.5831	8.46457	7.97344	7.6511	7.7987	7.89758	7.91599	8.03259	6.064	9.20361	7.45876	9.26535	7.92094	7.11946	8.26519	8.4195	9.86151	9.33689	9.92883	9.36537	8.03504	9.67066	8.46212	8.56994	9.26049	9.23582
12.3509	12.4002	11.8403	11.7482	11.6169	11.9048	11.7279	9.81626	9.73193	9.53128	10.5953	9.95915	11.0707	10.2732	9.28788	10.0244	10.2296	10.7583	10.9533	10.5878	10.7104	9.95554	10.0661	10.1583	10.1253	10.8468	10.8222
11.1738	10.929	11.4165	10.9717	9.8877	10.5156	10.3192	11.0719	10.797	10.9244	11.5989	10.8961	11.5844	10.5126	10.0973	10.3609	10.7763	11.8274	11.7708	11.7411	11.7657	10.8142	11.0745	10.8046	10.0162	10.8039	10.9202
9.2764	9.58244	10.2717	9.8561	9.24652	9.518	9.9267	8.7403	9.5013	9.60105	9.39143	9.18775	8.70735	8.12706	7.96008	8.98296	8.489	9.9509	9.77736	9.57356	10.6108	10.0873	10.1054	10.0945	8.24187	9.09901	8.89321
15.1635	15.123	15.0804	15.0744	15.0206	15.0308	15.0705	14.8458	14.9608	14.8797	15.0055	14.989	15.1406	15.0433	14.8864	14.9301	14.8839	14.9118	14.9638	14.7742	14.9099	14.8051	14.7589	14.8907	14.9841	14.9326	15.0594
9.42667	9.52165	9.28474	10.0623	10.8971	10.735	10.235	10.8037	10.902	10.6599	10.4987	10.2237	9.60821	10.4322	11.1727	10.9637	10.6808	10.4232	10.4766	10.9597	10.7797	10.7653	11.0787	10.5936	10.209	9.71292	10.1029
9.70747	9.6972	9.80666	9.71351	10.2391	10.0577	10.2583	10.9342	11.1479	10.5581	11.2353	11.0688	10.4338	10.7884	10.5719	10.7283	10.736	10.9091	10.7035	10.5767	11.041	11.6242	10.9465	11.1833	10.9742	10.7543	10.9225
12.4448	12.3877	12.4598	12.4314	12.4314	12.5405	12.6529	12.6153	12.8179	12.6457	12.8173	12.8991	12.7461	12.8039	12.5991	12.8307	12.449	13.032	12.8242	12.7533	12.871	13.2544	12.8039	12.914	12.5874	12.6508	12.7883
5.69176	5.69176	5.69176	5.33604	6.04674	5.50874	5.69176	8.09871	8.71364	6.6183	8.555	7.08544	7.54851	7.95181	7.55432	7.84986	7.68745	7.2135	6.72496	7.50727	7.85771	8.69614	8.13017	6.86247	6.97875	7.3784	7.09097
10.2305	10.3127	10.176	10.1861	10.2654	10.469	10.0552	11.3429	11.3825	11.0676	11.7627	11.3755	11.4625	11.5351	11.6335	11.5404	11.3757	11.2009	11.4558	11.3213	11.3588	11.6833	11.1003	11.0989	11.1383	11.1753	10.7923
14.1237	14.134	14.0253	13.8522	14.223	14.3555	14.2891	14.7698	14.8302	15.0571	14.7907	14.8613	14.8203	14.9043	14.8362	14.8478	14.9173	14.18	14.2783	14.3054	14.5838	14.8047	14.4624	14.6399	14.8063	14.7411	14.8736
10.067	9.84279	9.2421	10.2741	9.94243	10.4327	9.69963	7.85813	8.64683	8.53223	8.65292	8.36791	9.96839	9.10766	9.87802	10.4634	10.1559	9.62263	9.84595	9.95644	9.54651	9.38577	10.192	9.6621	9.30118	9.38392	8.7905
10.8483	10.3306	10.0733	11.1593	10.6294	11.0018	10.7992	10.602	10.6067	11.1034	10.8195	10.7575	11.4907	10.9912	12.0293	11.351	11.4761	11.0032	11.3005	11.6394	11.2928	10.9718	11.3132	10.9151	11.0904	10.9718	10.482
7.85507	7.56468	8.58644	8.83662	8.06466	8.56985	8.29406	9.65866	9.92174	7.09473	10.1614	8.35369	8.41189	9.49408	8.54025	9.65312	9.76324	9.48412	9.6286	10.2983	10.1412	10.2977	9.86511	9.45559	8.80538	8.63717	9.35449
11.0322	10.8002	10.7888	11.0857	10.0727	10.8379	10.2129	11.4907	11.805	10.0051	11.9798	10.0885	9.74756	11.251	10.7263	11.8119	11.843	11.8381	11.1538	11.8948	11.7037	9.43503	11.3962	11.1498	11.4279	11.7007	11.5839
12.0789	12.1304	11.6634	12.0977	12.2019	12.1779	12.0711	12.1114	12.3066	12.313	12.7222	12.0485	12.0252	12.1604	12.0897	12.5253	12.5583	11.9992	11.9039	12.1619	12.1002	11.7272	12.1258	11.9696	12.1128	12.1425	12.2991
9.53867	9.5595	9.5333	9.21543	9.88437	9.63452	9.83996	10.5193	10.5508	10.7293	10.8626	10.4762	9.63674	10.8061	10.894	10.9169	10.6848	9.10303	9.24335	9.06469	9.07772	10.1314	9.42047	9.61128	10.6082	10.197	10.2106
14.1021	13.7389	13.4798	14.1999	14.5462	14.5696	14.4388	13.7795	14.05	13.9801	14.1567	13.6118	13.8352	13.8788	14.4287	14.3885	14.3397	13.9974	14.0709	14.1934	13.9307	13.9576	14.0421	14.347	13.903	13.8988	13.8292
12.132	12.1801	12.1966	11.9316	11.2667	11.9316	11.5373	11.3492	11.0665	11.8892	11.6711	11.6824	11.948	11.7823	11.2998	11.3961	11.643	11.8815	11.5785	11.5496	11.8778	11.1609	11.3826	11.623	11.7641	11.9154	11.7387
11.725	11.6783	11.9621	11.9621	12.0801	12.2209	12.3802	12.4343	12.2396	11.6022	12.3392	12.5146	12.5424	12.0781	11.9053	11.6601	11.9935	12.5627	12.5027	12.0983	12.718	12.6911	12.5824	12.914	12.1374	12.2509	12.5131
11.0928	10.8234	10.6327	10.9302	10.4919	10.5115	10.8234	11.641	11.4672	7.50176	11.5569	9.57299	9.0856	11.5866	11.0526	11.3941	11.3856	11.9533	11.5256	12.104	11.9615	9.94084	11.6448	11.3007	11.4753	11.4691	11.6116
8.54875	8.83878	7.82097	8.00939	8.88536	8.65103	9.1567	9.45228	9.46528	10.0196	9.7786	8.67069	5.41347	9.5849	9.91482	9.65129	9.65231	9.15093	9.35828	8.44014	9.36555	9.50356	9.15093	9.18595	9.59649	9.35234	9.38561
9.26473	9.16359	9.22773	9.53753	8.27359	8.46187	8.57952	10.6839	10.6713	8.08466	10.7029	10.0597	9.8465	10.4817	10.07	10.1436	10.3583	10.8275	10.184	10.4784	10.6013	10.3762	9.86251	9.4731	9.88047	9.99801	9.79947
13.7836	13.8966	13.6989	13.894	13.5398	13.5925	13.4917	12.7795	12.709	12.3526	12.9432	12.9384	13.2235	12.7989	12.8092	12.4369	12.3638	12.8061	12.8151	12.9221	12.8402	12.6294	12.6621	12.7027	12.7206	12.6807	12.6735
11.0155	10.925	10.9329	11.0615	10.7467	10.925	10.5055	8.78339	9.27506	7.07305	9.27556	8.46796	8.98064	8.65304	8.37513	9.56374	10.0339	10.1325	9.33777	10.123	9.845	8.92716	9.18777	9.37003	9.70088	9.9902	8.89466
7.20725	6.4194	6.87876	6.98622	6.87876	7.02929	6.04992	6.47328	6.34006	5.33757	6.73244	5.47791	5.99566	6.34006	5.77672	6.56913	6.87071	7.93519	6.74138	7.20199	7.43668	6.31401	7.16003	6.50767	6.25527	6.80713	6.37013
10.9938	10.6396	10.5963	11.1708	10.7005	10.7721	10.6163	10.0316	10.3916	9.99859	10.4391	10.0454	11.0465	9.98347	10.1382	10.4285	10.9064	10.8078	10.2588	10.3962	10.423	10.0128	10.0354	10.0059	9.70933	10.4489	9.37634
9.9594	9.75533	9.12125	9.59631	10.9923	10.1829	10.2651	10.5873	10.5702	10.4039	11.0626	10.4705	10.2876	10.6914	10.9381	11.0036	10.7957	9.91803	10.6487	9.67866	10.2966	10.5685	10.7487	10.5145	10.6561	10.1548	10.562
13.4968	13.38	13.3532	13.5998	13.1926	13.2135	13.1944	11.4853	11.3174	11.6016	11.5727	11.4613	11.6406	11.4743	11.8593	11.7069	11.6074	11.6149	11.5006	11.349	11.4985	10.8036	11.2278	11.1619	11.0662	11.1802	11.3767
11.4722	11.7046	11.0226	11.4674	12.259	11.8905	11.6634	10.9572	11.0531	8.31621	11.1682	10.3778	11.1332	11.0412	11.1056	11.2953	11.3626	10.2115	10.8169	10.9702	10.2021	9.93282	10.8894	10.6285	11.0471	10.9169	10.5964
12.2573	12.1897	12.3008	12.1107	11.5917	12.4844	12.2278	12.563	12.4569	12.8573	12.5182	12.5864	12.7941	12.6344	12.7862	12.899	12.9463	12.6526	12.6703	12.9113	11.9889	12.5241	12.4935	12.6147	12.6225	12.5024	11.9523
13.276	12.8609	12.8588	12.9627	12.3816	12.8262	12.3971	12.285	12.7808	12.6236	12.9314	12.3381	13.1801	12.5596	13.0774	13.2058	13.1586	12.9471	12.8213	13.2153	12.341	11.7432	12.5073	12.1642	12.8331	12.9642	12.0912
14.2817	14.6062	14.0312	13.7105	14.61	14.4592	14.4278	15.141	15.056	15.2063	15.1341	14.9672	15.0666	15.1965	15.1723	15.0513	15.1645	14.6229	14.8549	14.5259	14.5202	14.9425	14.8368	15.0259	15.2667	15.2618	15.2565
9.87153	9.85706	9.12099	9.58656	10.1188	9.8704	9.96767	10.9508	11.1806	9.51687	11.3807	10.5887	11.0247	11.4063	10.8806	11.2048	11.3295	10.9684	10.5846	9.85337	10.7978	11.2135	10.8878	10.7397	11.4896	10.9442	11.3408
12.5793	12.809	12.2685	12.4884	12.825	12.553	12.4846	11.7049	11.9196	11.6594	12.0523	11.9119	12.4319	11.9706	11.9724	11.9557	11.9873	11.8727	11.73	11.2156	11.8336	11.8814	11.7703	11.8268	12.0511	11.7589	11.902
8.47626	9.08728	8.95628	9.02485	9.69706	9.38203	9.82075	10.3716	10.538	9.60934	10.3322	9.17796	5.65965	9.57512	9.28737	9.9078	9.8113	9.54193	9.56142	9.87022	9.98182	10.4678	10.6374	10.1162	9.87816	9.42704	9.66361
6.81486	6.24378	6.24378	6.33037	6.20158	6.20665	5.96079	6.88718	7.32093	3.58852	6.94286	5.49038	6.29854	6.32449	6.29854	6.29854	6.3727	5.94219	6.4078	7.03798	6.70214	5.24268	6.32659	7.03798	6.09117	5.38757	6.71049
13.7304	13.6785	13.9163	13.9042	13.4227	13.5596	13.6706	12.4511	12.179	12.6364	12.5959	12.6091	12.3632	12.8108	12.8853	12.0819	12.5885	12.6306	12.2986	12.7636	12.6406	12.514	12.3807	12.5855	12.3583	12.4263	12.412
2.92385	3.20326	3.06205	3.24299	2.84933	2.95649	3.76502	7.03813	7.10495	2.89527	6.97089	5.01663	3.32544	7.13784	5.9834	6.18797	7.0449	7.77404	6.32076	7.75841	6.22363	5.56298	6.22363	6.22363	5.92517	6.3305	6.2249
7.70218	6.74192	6.98744	7.49192	8.19747	8.33125	7.95467	7.77743	9.0052	8.47503	8.84964	8.09557	8.886	8.38554	9.05195	9.66821	9.4876	8.37011	8.78802	7.75373	8.62586	8.653	8.91672	9.01452	8.60586	8.85043	8.20179
11.4889	11.3359	11.1168	11.3033	10.4076	10.8464	10.2325	10.7273	11.3294	11.0097	11.4213	10.7957	11.9746	11.2838	11.6733	11.8108	11.7124	11.4612	11.0618	11.768	11.2653	9.87644	10.672	10.7235	11.2396	11.5238	10.2689
14.4366	14.4404	14.1325	14.1775	14.3593	14.2291	14.1423	13.9462	14.0456	13.2738	14.0122	13.5043	13.4694	13.7706	14.2522	13.9435	13.9652	13.8388	13.753	13.6649	13.8067	13.4482	13.6396	14.0043	14.2277	13.9067	14.1273
13.3456	13.2171	13.1979	13.134	12.7469	12.898	12.9294	13.7237	13.8315	13.2299	13.8619	13.6898	13.8484	13.5431	13.6142	13.817	13.7903	13.8053	13.3822	13.7129	13.5196	13.6077	13.2644	13.2483	13.7116	13.5171	13.5007
11.6711	11.6403	11.5824	11.5165	11.1759	11.3013	11.1735	11.8757	11.9616	10.974	11.9182	12.0948	12.3804	12.1355	12.1627	11.9616	12.2842	11.8009	12.1644	12.1441	11.9754	11.0857	11.9159	11.9571	11.7959	12.0907	12.1899
14.4738	14.4948	14.545	14.6262	14.0706	14.1926	14.1381	13.1425	13.474	12.5085	13.5346	12.9825	12.9573	13.2176	13.0888	13.3627	13.2441	13.2316	13.1578	13.5317	13.4607	13.194	13.1544	13.1985	13.1752	13.145	13.0943
8.19282	8.50899	9.76088	8.49076	7.51002	8.55085	9.53837	10.4985	10.7484	8.99849	10.3918	10.8895	10.6115	10.274	9.29125	9.97071	10.0304	11.8201	11.3059	10.3319	11.2834	11.0659	10.6133	10.1572	9.73261	9.84936	9.79823
12.8998	12.8428	13.3452	13.0001	12.423	12.7714	12.7991	11.855	11.8027	10.8486	11.6361	12.1846	11.6891	11.7206	11.3611	11.4409	11.4794	12.7981	12.2138	12.2001	12.5223	11.9237	11.9387	11.9379	11.3185	11.5585	11.4647
7.01048	6.98177	7.89531	7.72049	4.86213	6.24958	6.98121	9.75929	10.1615	6.41132	10.2592	8.79169	10.462	9.95798	8.8316	10.4384	10.2669	10.6859	11.0822	11.0312	10.4338	9.84635	9.58522	9.63202	9.21253	9.68966	8.85016
12.6977	12.3861	12.3443	12.6127	13.5417	13.2477	13.2909	13.2713	13.45	12.8758	13.4911	13.3895	13.6651	13.3316	13.7365	13.4502	13.4756	12.9936	13.0945	12.8807	12.7207	13.4463	13.1002	13.1103	13.2497	13.1672	12.9709
10.6493	9.92432	10.1387	10.6929	10.3189	11.0016	10.0651	11.8218	12.3761	12.2561	12.1022	12.2141	12.3696	11.9837	12.4985	12.9537	13.0349	12.2733	11.3476	12.1502	12.0116	11.4607	12.1238	11.4882	11.7907	12.1468	11.5137
9.22918	9.91666	10.4518	10.3371	8.92307	9.62678	9.36582	6.89888	8.00733	8.11885	7.42386	8.81976	8.4625	7.31998	7.87095	6.85835	6.41906	8.3881	7.56729	8.36664	8.16002	8.35431	7.11503	8.18172	7.96297	7.76291	7.68215
5.36762	4.96529	4.96529	5.90255	6.55867	5.91105	5.36762	7.37196	7.91149	6.62124	7.26434	4.02444	4.64754	7.26356	7.19689	8.89553	8.34962	5.54985	5.57603	5.35754	5.86589	6.06787	6.06772	5.22759	6.88347	6.79744	6.20665
10.1111	10.015	9.69791	10.4351	11.2793	10.6937	10.2141	10.2667	10.6283	9.47447	10.7061	10.2259	10.7597	10.1681	10.2608	11.4076	11.0215	9.45125	9.86849	9.41048	9.39435	10.2233	9.31364	9.96099	10.3704	10.744	10.0388
12.5505	12.9405	12.7228	12.703	13.1077	13.1507	13.2144	12.0478	12.1799	12.2896	12.2518	12.3844	12.4363	12.0618	11.6081	11.8803	11.9469	12.1167	11.9984	11.5287	12.294	12.0827	12.3261	12.2684	12.3446	12.2383	12.4859
8.65438	8.65438	8.00485	7.8527	9.3925	8.75928	8.89859	8.80947	9.87356	7.96679	9.75788	8.40598	7.53941	9.57742	8.90984	9.31374	9.66222	9.63862	9.18905	9.07817	8.90466	9.31805	10.0907	9.19169	9.40739	9.6803	9.98975
11.2891	11.2891	10.955	10.9007	11.6316	11.6615	11.2525	11.8682	11.7433	12.1392	12.3561	11.7025	11.7757	11.9674	12.0386	12.2446	12.2541	11.7807	12.0044	11.8144	11.3952	11.9388	12.2962	11.6492	11.9751	12.1221	11.9061
8.56181	8.44447	9.65044	8.84462	10.1867	10.0682	11.079	11.1892	11.1157	10.8049	10.3277	11.9882	9.66362	10.6578	10.5211	9.95459	10.2561	8.70267	9.33143	8.93033	9.24185	10.2353	10.0935	10.1001	10.1456	9.92592	10.1625
7.53185	6.65647	8.95731	8.90709	7.59806	8.22727	8.22727	8.4013	8.05702	8.46471	9.27622	8.57509	9.01355	8.40533	8.60888	8.59448	8.68483	10.3017	9.54845	9.3786	9.79969	10.2761	8.93587	8.66504	7.63564	8.46953	7.43665
14.1663	14.0725	13.9017	14.0592	13.7763	13.8912	13.8305	12.7082	12.8391	12.9896	12.874	12.8273	13.2457	13.0884	13.0742	13.3155	13.3328	12.9359	12.8314	12.684	13.1883	12.4926	12.8581	12.9708	13.2504	13.1546	13.1906
11.482	11.5535	11.072	11.4378	12.0398	11.8272	11.8316	12.2348	12.3615	12.5936	12.5707	12.1483	12.3189	12.2798	12.145	12.2789	12.2133	12.1843	12.0007	11.9886	12.1883	11.9904	12.2076	12.3212	12.338	12.3663	12.4039
7.04272	6.34789	7.21422	7.40258	7.86709	7.65154	8.23589	10.179	10.0039	9.10895	10.0926	9.61169	9.18536	9.99337	10.1193	9.59455	10.0479	9.0197	9.60397	8.86659	9.28887	10.4133	9.40052	9.75676	9.38087	9.10282	9.34364
11.8203	11.9546	11.7897	11.7543	11.6499	11.7897	11.8474	12.4805	12.7135	11.8863	12.8588	12.4315	12.5426	12.7006	12.632	12.8027	12.619	12.5281	12.4977	12.843	12.1562	12.6968	12.3302	12.2404	12.5872	12.3843	12.1915
12.6555	11.3127	11.7002	12.1248	11.9476	12.2818	11.9499	12.193	12.6161	12.2644	12.6162	12.4643	12.8355	12.4562	13.1255	12.8403	12.3025	12.7348	13.0597	12.2381	12.2419	11.818	12.4965	12.3297	12.0694	11.9284	11.8517
2.05099	2.05099	2.05099	2.05099	2.05099	2.05099	2.05099	3.36774	5.07323	1.40468	5.43781	1.40468	1.40468	3.09863	1.40468	3.21583	4.63354	4.35025	4.35025	5.16774	6.50354	4.3605	4.3605	4.3605	4.38596	4.35025	4.35025
12.0111	11.8961	11.6853	11.9512	11.8961	11.633	11.7565	12.1106	11.8123	11.6584	12.2481	11.5803	12.3678	12.1979	12.1767	12.0026	12.4721	12.5615	12.6264	12.7194	12.6866	13.0388	12.8978	12.2541	12.1403	12.0182	12.3137
9.44521	9.55684	9.81465	10.0207	8.23164	8.89333	8.49472	9.3754	9.48028	7.63594	9.60001	8.21962	8.87401	9.53986	8.17944	9.43566	9.65858	11.3532	10.5431	11.7385	11.1909	10.3645	11.1659	9.82647	8.89371	9.59371	9.12313
13.554	13.6145	13.4737	13.4175	13.3161	13.0677	13.135	13.249	13.1316	12.9676	13.3109	12.8825	13.3972	13.279	13.0861	13.2928	13.5608	12.594	12.7655	13.072	12.8973	12.8412	12.8786	12.769	13.2558	13.6671	13.2808
11.2775	10.6785	9.76021	10.5217	10.8747	10.053	10.7878	12.5261	12.3483	10.6708	12.5737	10.9336	11.3971	12.223	12.048	12.5086	12.6802	11.4458	11.0238	11.4219	11.7634	11.0988	11.1054	11.0874	11.4893	11.769	11.9806
15.14	15.1622	15.3196	15.335	15.0344	15.14	14.9362	14.8717	14.8568	14.5919	14.983	14.8788	15.0599	14.8523	14.964	14.8435	14.894	15.0271	15.011	15.2112	15.1725	15.0045	15.0654	14.9766	15.0392	15.0452	14.9364
10.4107	10.5051	10.2431	10.4566	11.7294	11.4959	11.5358	10.2738	10.3979	11.6807	10.9751	10.6413	10.9619	10.4907	10.4596	10.5617	10.6091	10.5323	10.1979	10.0684	10.5051	11.09	10.7091	10.9858	10.8817	10.8981	10.8642
10.416	9.50484	11.3375	10.8106	10.4339	10.6685	11.3122	12.0455	12.3634	10.182	11.8095	10.8664	9.77969	11.8997	10.8165	11.4976	11.6934	12.3105	11.88	12.4541	12.5652	12.5798	12.4814	12.0679	10.577	10.3415	11.3256
13.6317	13.5499	13.7889	13.651	13.4592	13.6057	13.7303	13.1318	13.0153	12.3567	12.837	12.9948	12.0131	13.057	12.7174	12.6264	12.7742	12.7173	12.5618	12.4867	12.4888	12.0891	12.4437	12.4445	12.6065	12.6497	12.8523
11.2931	11.5573	11.3589	11.3589	11.572	11.1422	11.4207	9.49044	9.53046	9.26505	9.77388	9.26533	9.36929	9.75365	9.70719	9.55889	9.81641	9.61714	9.48216	10.1676	9.92151	10.1123	9.71241	9.64171	9.11657	9.26565	9.60487
10.8952	10.1818	11.1777	10.6967	10.8671	10.6625	11.1374	11.3078	11.3242	7.15036	10.5876	10.5042	9.62152	10.7805	10.0571	10.4451	10.9443	11.0245	11.1426	10.7043	11.3929	10.2717	10.6298	10.7616	9.64977	9.80855	11.0194
11.3895	10.6676	11.9756	11.2914	11.1323	11.086	11.6617	12.3169	12.0483	11.7889	11.4956	12.5444	11.8692	12.0646	12.0512	11.6808	12.0614	12.1914	11.9383	11.9707	12.4908	12.2229	11.8249	11.9433	11.4351	11.8391	11.9129
7.26758	7.54453	6.79934	7.46752	8.3274	7.76688	7.45211	8.69111	8.38621	9.40493	9.4368	8.92953	7.16389	8.11542	8.41716	8.52952	8.66171	8.1307	7.37751	8.58556	7.97107	9.40052	8.86758	8.4633	8.44257	8.04633	7.46209
14.0385	14.0961	13.9489	13.6218	14.1668	14.1248	14.2283	14.4933	14.1638	14.5518	14.5047	14.5708	14.384	14.4494	14.6187	14.3351	14.1234	14.0789	14.0321	14.0133	13.7411	14.1422	14.0429	14.2666	14.2095	14.2187	14.4189
14.357	14.5076	14.4223	14.3318	14.1557	14.2822	14.1944	13.5456	13.9203	14.0421	14.2526	13.8666	14.0589	13.9066	13.9657	14.0263	13.6264	13.5117	13.6072	13.9397	13.3226	13.5696	13.3537	13.3923	14.0194	13.8123	13.7978
14.2913	14.5044	14.3426	14.2681	14.0694	14.0997	14.1059	12.2909	12.7043	12.3952	13.0727	12.4331	12.6742	12.7207	12.5882	13.0991	12.5475	12.5218	12.3489	12.7198	12.4202	12.3146	12.3044	12.3325	12.79	12.6538	12.5542
10.4894	10.6445	10.3372	10.3575	11.435	10.9266	11.1918	10.614	10.5022	10.7504	10.7325	10.7108	10.21	10.5564	10.374	10.4085	10.5834	10.5392	10.6393	10.6538	10.7391	10.6686	10.5214	11.2198	10.5815	10.8265	10.7255
13.4403	13.4252	13.2972	13.4151	13.1926	13.3292	13.388	10.4604	10.891	9.09995	11.0273	9.83813	9.54655	11.1598	10.3786	10.7753	11.2117	10.7301	10.6921	10.7979	11.0203	9.17287	10.8087	11.0956	11.2962	11.1939	11.4451
12.3623	11.9445	11.5708	12.3577	12.8205	12.5962	12.8178	11.3437	11.5501	11.8596	12.035	11.5596	11.7902	11.6658	11.7753	11.7015	11.5127	12.1553	12.1776	12.0287	11.8793	11.8208	12.2074	12.0097	11.545	11.8556	11.3845
9.14801	9.26137	9.34898	9.34898	9.50037	9.35772	9.55544	9.1107	9.48315	9.63633	9.6712	9.77582	10.1389	9.08628	8.77121	9.30678	9.0878	10.1909	9.93627	9.76685	10.3053	10.9777	10.6567	10.2009	10.2977	9.03958	9.69885
11.9289	12.1479	11.9044	11.9235	11.7179	11.7853	11.6389	11.6856	11.8744	11.4207	11.9823	11.7586	12.22	12.0264	12.0065	12.0096	12.1176	11.4014	11.5485	11.5078	11.2538	11.382	11.1607	11.3649	11.6536	11.9491	11.9365
13.6786	14.076	13.8666	13.7043	14.3668	14.2804	14.3206	14.5417	14.4947	14.6257	14.5749	14.7323	14.5669	14.6671	14.6031	14.4279	14.4517	14.2578	14.4403	14.2908	14.3507	14.5823	14.5051	14.6347	14.652	14.675	14.8228
12.5733	12.6915	12.7208	12.4187	13.1458	13.0553	13.1561	13.1358	13.3325	13.1801	13.2748	13.5189	13.4509	13.0487	13.0284	12.7225	12.7626	12.5123	12.9388	12.2064	12.8273	13.1696	12.7087	12.9563	13.0682	12.9096	13.1055
13.6809	14.0117	13.6168	13.4842	13.8387	13.7531	14.2842	14.2021	14.2232	14.5192	14.3936	14.3413	14.4212	14.455	14.5051	14.3841	14.4476	13.6875	14.1106	13.8749	13.8873	14.4322	13.723	14.0176	14.1849	14.2509	14.2707
10.3775	10.672	10.448	10.3173	12.3203	11.8296	11.9593	11.6606	11.7652	12.3041	12.0147	12.1574	11.3539	11.4704	10.8357	11.1765	11.2036	10.8794	10.799	10.3892	11.0022	12.1487	11.7612	11.9693	11.666	11.6982	11.8357
10.4239	10.2445	10.722	10.1224	8.15751	9.81783	9.22224	11.754	11.6135	11.5818	12.0782	11.8485	11.9475	11.7533	11.1861	12.0688	11.9138	11.3896	11.5761	11.0731	11.9223	11.5836	11.7598	11.2436	12.0255	12.0587	11.8945
10.5297	10.0673	10.715	10.7954	11.0776	11.5248	11.0295	11.491	11.8216	12.208	11.7465	11.8552	11.3388	11.5359	11.684	11.5409	11.0969	11.5399	11.5498	11.1953	11.9056	11.8773	11.8819	12.1228	11.5681	11.9166	11.5447
11.97	12.724	12.1911	11.6415	13.5585	13.2155	13.3622	13.867	13.8591	13.9686	14.2223	13.8738	12.4524	13.9591	13.8055	13.6285	13.9465	12.7542	12.8738	12.4205	12.7284	13.6235	13.3854	13.4541	13.7588	13.7982	14.0095
12.2746	12.1338	12.2014	12.2197	13.0071	13.0465	12.8357	11.9994	11.93	12.3516	12.3316	11.8829	11.1434	12.0255	12.0424	12.2269	12.1792	12.0844	11.9653	11.1112	12.2969	12.2553	12.6381	12.6974	12.3989	12.3572	12.5489
6.69983	6.48059	7.09439	6.90687	7.06143	7.18132	7.69426	9.25711	9.54907	8.99551	9.48842	10.1177	9.08525	9.28219	9.08525	8.86426	9.37482	9.33156	9.14755	9.63122	9.23385	10.0033	9.67012	9.45239	8.79807	9.21627	8.42857
11.0174	11.4786	10.8425	10.7389	12.2437	12.0211	12.2128	12.5273	12.5845	12.519	12.7556	13.2194	12.9206	12.8833	13.1279	12.7132	12.5891	12.3881	12.2011	11.8939	12.2592	12.9661	12.7237	12.9602	12.9002	12.8248	12.9404
7.49563	7.60553	7.2249	7.62195	8.75256	8.19729	7.94658	7.87607	8.32743	8.38081	8.41589	7.94289	7.78171	8.04845	8.60925	8.3982	8.41391	7.48347	7.27635	7.6464	7.85119	8.16814	7.825	7.8795	7.44202	8.11611	8.0498
9.77185	9.91692	9.25976	9.90285	9.91663	9.94928	10.0211	11.0093	11.176	10.0942	11.2993	10.5499	9.93267	11.1771	10.4371	11.2344	11.1639	11.4405	10.8767	11.0027	10.999	11.1099	11.3401	11.1633	11.4128	11.0756	11.6016
10.7434	11.094	10.6748	10.7332	10.881	11.0386	10.881	10.2993	10.5935	11.0691	10.846	10.7637	10.4051	10.7752	10.4284	10.5974	10.6222	10.9697	10.7714	10.7872	10.8457	10.9845	10.9205	10.8024	11.1803	10.7563	10.9375
10.4539	10.7953	10.4555	10.4636	11.3975	11.2465	11.3105	10.7383	10.6438	11.2942	11.0415	11.0267	11.0275	10.783	10.6281	10.7392	10.7411	10.8698	11.0325	10.3706	10.8975	11.445	11.3024	11.4629	11.2237	11.0793	11.3027
12.7134	9.73639	12.961	14.2805	13.1393	12.7919	11.7748	11.0275	11.7689	10.0745	10.1114	10.0707	8.38772	9.09992	9.65129	11.168	8.93972	10.7644	10.1426	10.9085	11.6082	10.9426	10.7293	10.4828	9.4807	9.75759	10.2382
12.6437	10.8958	13.201	13.6276	12.4107	12.5389	11.8788	11.9797	12.5	12.0146	12.0798	12.255	11.7868	11.5777	11.3128	12.2434	10.8661	12.4431	11.7451	12.3324	12.8849	12.0098	12.3287	12.4656	11.4841	11.2763	11.5766
13.1731	13.052	12.8402	13.1779	12.5173	12.9187	12.7183	11.833	11.9048	12.2562	12.3312	11.5634	12.4943	11.9735	12.014	12.3837	12.3477	12.38	12.0952	12.6039	12.3554	11.8472	12.3217	12.0394	12.1182	12.1391	12.1318
13.8313	14.224	13.8383	13.295	14.1678	14.0406	14.0659	14.4679	14.5719	14.3568	14.2869	14.2798	14.2935	14.1279	14.4114	13.949	14.0184	14.1248	13.9574	13.9513	13.995	14.4117	14.0256	14.1548	14.3783	14.3332	14.6248
12.4653	12.1038	12.0551	11.9633	12.8101	12.2208	12.1853	5.19532	5.19532	5.19532	5.15017	5.19532	5.15017	5.15017	5.15017	5.15017	5.15017	5.67523	5.99562	4.99384	5.3169	4.8329	5.42661	5.12017	5.42799	5.52982	5.32496
11.5787	11.8642	11.4852	11.8239	12.015	11.8304	11.6628	9.67944	10.3848	9.64391	10.4304	8.88013	9.51648	9.71129	9.08479	9.99656	9.99137	10.1882	10.4665	10.0672	10.45	9.999	10.4066	10.2706	10.2849	10.2021	10.2332
11.0649	11.3716	11.2253	11.0718	11.798	11.4864	12.0356	12.1865	11.8826	12.0567	11.6851	11.9686	10.5113	11.6864	11.4249	11.3925	11.443	11.1494	11.2771	11.0006	11.4039	11.9351	11.7127	11.8546	11.7394	11.7372	11.7935
12.045	11.9169	13.1024	12.9181	12.3263	12.6928	12.9459	11.6698	11.9667	11.5004	12.2208	11.8167	11.7758	11.6494	11.8461	12.1465	11.7805	12.4352	12.2521	12.9694	12.7429	12.1464	12.8119	12.4935	11.4549	11.7427	10.859
13.5132	13.2842	14.253	14.0458	13.3932	13.73	13.7561	12.3571	12.7276	12.4782	12.7433	12.4821	12.6532	12.3296	12.5905	12.804	12.5335	13.1014	12.9404	13.4906	13.1524	12.8836	13.1379	13.1139	12.7786	12.9086	12.2374
11.9528	12.0184	11.7096	11.6634	12.4844	12.2951	12.2707	12.174	12.2249	12.6195	12.6069	12.7093	12.5575	12.4304	12.2673	12.273	12.413	12.3905	12.3508	12.3304	12.119	12.586	12.462	12.2778	12.4298	12.5153	12.3059
7.14065	6.98226	6.73411	7.0198	7.90977	6.91933	7.0198	3.6573	4.2791	2.89008	3.8973	2.87468	2.93495	3.577	2.89008	3.69355	4.56625	5.75632	5.77317	5.29266	4.18361	3.21565	4.25591	4.4547	5.06727	5.15775	4.78989
10.2662	10.069	9.58191	9.83845	10.7292	10.026	10.243	9.05021	9.08201	7.52675	8.4242	7.84162	7.06014	9.23324	8.75969	9.07152	9.43724	9.48309	9.90377	8.77421	9.29936	9.62368	9.10802	9.70697	9.7315	8.98322	9.86944
10.5845	10.4616	10.308	10.577	10.8124	10.5772	10.6312	10.2152	9.91186	10.2857	10.393	10.8265	10.9194	10.3734	9.99355	10.4099	10.5595	10.31	10.3069	9.94565	10.241	10.6043	10.0088	10.077	10.1647	10.1982	10.422
12.5427	12.7674	12.3023	12.4367	12.8165	12.6236	12.6124	12.3342	12.4801	12.0207	12.5624	12.3982	12.4037	12.3107	12.1083	12.2498	12.2594	12.5883	12.8336	12.0776	12.5491	12.6704	12.448	12.7803	12.4867	12.4956	12.8241
12.7144	12.5498	12.4922	12.4407	12.0376	12.2742	12.1073	11.9662	12.0018	11.9719	12.1429	12.1354	12.4847	11.9878	11.8069	12.0977	12.0338	12.4568	12.4122	11.8103	12.2133	11.9387	11.9311	12.2503	12.0286	11.9417	12.2888
10.5618	11.0435	10.5315	10.7244	11.0833	10.7634	11.3579	11.4241	11.4452	11.4931	11.3976	11.0647	9.18598	11.3269	11.0753	11.3088	11.3654	11.177	11.3366	11.3296	11.319	11.7493	11.279	11.5878	11.1471	10.891	11.1514
13.0098	12.9489	13.037	12.8969	12.6272	12.7389	12.8037	12.8093	12.8513	12.792	12.7295	13.0466	13.0252	12.9322	12.9364	12.8659	12.829	12.7346	12.6366	13.0896	12.6576	12.6827	12.5618	12.5823	12.6752	12.7351	12.5959
9.63714	9.25493	9.79289	9.58334	9.09826	9.3423	9.99237	9.91778	9.64459	7.2539	8.4516	10.1771	8.45075	9.32212	8.88598	9.54531	9.24519	9.45108	9.10732	8.85171	8.78089	8.00947	8.44737	8.65051	9.09857	9.4441	9.07285
10.4741	10.7797	11.1906	10.7389	10.3087	10.7893	10.8062	10.6147	10.3564	10.0519	10.0719	11.0376	10.0353	10.1864	9.97429	10.0747	9.89956	9.47542	9.9863	9.5483	9.60592	9.89709	9.51863	9.71762	9.94611	9.74271	10.0024
13.1338	13.1797	13.5421	13.2194	12.7417	12.9115	13.1243	11.8545	11.6014	11.6565	11.7133	12.5523	11.7556	11.9872	11.6372	11.7892	11.8352	12.0601	11.8554	11.9036	12.1169	11.2127	11.7054	12.0668	12.1065	12.0801	12.227
10.2363	10.0148	9.94291	10.069	9.97005	10.1224	10.2681	10.7878	10.9337	11.1809	11.1806	10.9962	11.2121	11.1675	11.3339	10.9592	11.1833	10.8535	10.9298	11.0992	10.986	10.9368	11.056	10.9521	11.3159	11.0564	11.2526
5.65933	6.4452	5.65933	5.49508	5.65933	5.65933	5.65933	9.77244	10.0137	9.22811	10.0304	7.45952	3.29273	9.55139	9.22811	9.72631	9.58061	8.88338	8.65271	9.17679	8.06211	9.87187	7.97986	8.26057	8.90514	8.27182	7.42584
10.3172	10.3968	10.3094	10.2243	10.15	10.3794	10.3094	11.5681	11.5506	11.2635	11.4367	12.0483	11.9203	11.5687	11.4199	11.3585	11.3808	11.4268	11.0656	11.2949	11.8737	11.5906	11.4367	11.8068	11.8631	11.5457	11.7844
10.9047	10.7155	10.5566	10.7241	10.0421	10.3157	10.4342	9.45129	9.50146	9.46747	9.77579	9.79103	10.0931	10.0551	9.86711	9.76476	9.93724	9.92873	9.6778	10.0037	9.76871	9.53072	9.48105	9.35651	9.64512	9.44738	9.43902
9.11546	8.66536	8.54434	8.87811	8.31167	7.98015	8.14915	5.67761	5.69726	5.21312	5.69396	5.67761	7.55479	6.69684	5.75867	5.97597	7.14853	6.19256	6.2787	6.33841	5.60109	4.29549	6.00608	6.52534	5.5784	6.21651	5.54958
8.93978	8.71121	8.54869	8.63022	8.12631	8.33469	8.46867	7.217	7.23255	6.98764	7.03923	7.43246	8.03629	7.56079	6.62595	7.38712	7.56412	7.44947	6.89113	7.77359	7.2075	5.99653	6.84007	6.81935	6.81255	6.9958	7.29993
8.80443	8.63466	8.15235	8.47772	8.84947	8.66775	8.65903	8.33581	8.81079	7.70672	9.20569	9.07885	9.09408	9.36406	8.47779	8.81079	8.9881	8.41797	8.41797	8.41797	8.41797	8.41797	8.60703	8.41797	9.19206	8.7035	9.40388
13.1765	13.4814	13.2391	12.5149	13.4109	13.4296	13.7309	15.1216	15.0391	14.6225	14.9386	15.0189	15.0683	14.9841	14.7451	14.8845	14.7371	13.7649	13.8963	13.5118	13.5234	14.2324	13.6288	14.0004	14.422	14.6307	14.4404
9.44103	9.27994	9.78637	9.74397	9.85501	9.31303	8.99586	12.1155	11.937	11.3305	12.6515	10.9199	8.6055	11.622	12.1057	11.6408	11.7683	11.2939	10.157	11.0399	11.4832	12.0039	11.2273	10.8995	10.9167	10.9951	10.6808
11.481	10.9313	11.0808	11.5334	11.5858	11.4286	11.6141	10.3735	10.5797	10.1416	10.7896	10.7885	11.211	10.8835	10.6678	10.8798	11.0946	10.8381	11.1245	10.8502	11.0882	10.9115	11.086	11.0194	10.7011	10.9748	11.5354
10.8683	11.1751	10.6853	10.7536	10.8669	10.7206	10.6171	9.03448	9.59556	9.65202	9.66189	10.0177	10.0529	9.03448	9.03448	9.12609	8.87961	8.94688	8.97042	9.08565	8.76817	8.91079	8.6231	9.07757	9.80152	9.49495	8.81268
13.3759	13.1976	14.0258	13.2818	13.3759	13.2616	13.6049	13.7883	13.6242	13.3349	12.793	14.0853	12.6786	13.5331	11.3411	12.7808	12.9029	12.4543	12.3577	10.842	12.7708	13.294	12.0903	12.9007	12.8645	12.9933	13.2408
12.9784	13.0981	12.6761	12.8156	12.7458	12.8019	12.9707	12.3942	12.4393	12.3973	12.4314	12.3346	12.5472	12.159	11.3153	12.1781	12.3745	12.9479	12.7969	12.0196	12.774	12.8333	12.8316	12.7169	12.4332	12.1351	12.5799
10.649	10.4422	10.3377	9.97658	8.36391	8.78445	9.20007	11.76	11.9988	11.1442	11.7755	12.1373	12.6596	12.1129	9.96967	11.8047	11.524	12.1803	11.5758	11.4612	11.6666	10.5368	11.0275	11.109	11.4757	11.4784	11.2112
12.3824	12.5137	12.1104	12.7495	12.6621	12.7014	12.5137	12.0977	12.4778	10.0875	12.4171	11.0057	8.86303	12.1632	11.9282	12.6491	12.6536	12.134	12.1189	12.9827	12.2262	11.4028	12.4871	12.2098	12.195	12.2001	11.8954
10.4784	10.4456	9.55604	10.4456	10.733	10.4456	10.5197	10.3282	10.0605	9.71073	10.5634	10.4564	10.5784	10.0154	10.5442	10.4693	10.5053	10.324	10.1495	10.5585	10.5208	10.2012	10.7732	10.347	9.80341	9.61013	9.68179
7.21045	7.5122	6.80224	7.56239	7.5122	7.51478	7.70898	7.61924	7.71075	6.61128	8.71576	7.363	7.44997	7.96909	7.89798	8.16137	7.63708	8.13469	7.82475	8.22693	8.12299	8.16904	8.50103	7.86157	7.6871	7.45622	7.37497
14.1584	14.6366	13.7886	13.9099	14.4417	14.2422	14.2075	14.1932	14.2584	13.873	14.3715	13.8158	12.5732	14.255	14.065	14.1959	14.266	13.7772	13.5994	13.5747	13.8758	13.9587	13.6715	13.885	14.1975	14.2124	14.3326
11.394	11.4446	11.6219	11.4752	11.0042	11.4446	11.4023	11.7926	11.6878	11.916	11.9872	11.9642	12.0763	11.8872	11.2729	11.5549	12.0028	12.0888	12.2128	11.5373	12.1049	11.9125	11.7115	11.8541	11.7535	11.947	11.9707
13.6782	13.7107	13.4209	13.8423	13.7786	13.7913	13.5631	13.159	13.4338	13.1173	13.4333	13.0884	12.8225	13.4212	13.4663	13.8464	13.7231	13.3565	13.4317	13.9214	13.3595	13.3832	13.493	13.3331	13.2789	13.2088	13.1743
13.4646	13.065	13.1388	13.3725	13.4837	13.5037	13.0856	13.2014	13.6482	13.7725	13.3303	13.4792	13.7651	13.337	13.4969	13.9176	13.9098	13.7286	13.4853	13.1025	13.672	13.2892	13.6812	13.4819	13.5465	13.6987	13.528
12.0694	12.0134	12.0497	11.7622	11.6339	11.783	12.0109	12.0866	12.5104	12.3763	12.3252	12.9785	12.7359	12.1511	12.2033	12.0418	12.2279	12.5642	12.5137	12.412	12.3928	12.266	12.2445	12.2555	12.2941	12.193	12.1459
5.61743	5.63992	4.48344	4.96212	7.55485	6.55873	6.77493	6.44617	5.79673	3.01482	5.81875	5.8008	5.80154	6.48724	6.42627	5.33659	6.41883	6.59348	5.63958	6.05423	6.50961	6.95511	6.94783	6.8897	7.47805	6.68673	7.29386
11.1297	11.2954	11.2092	11.3309	11.3309	11.4985	11.6017	10.7102	10.3619	11.3977	10.639	11.0145	11.0384	10.7324	11.2898	10.5005	10.6304	11.226	10.6827	10.9174	10.9192	11.3019	11.1033	11.4626	10.857	10.8906	10.8777
11.5828	11.9769	11.9145	11.8005	12.2572	12.2755	12.1246	12.3729	12.4051	12.2756	12.6544	12.5085	12.4305	12.4305	12.3064	12.3903	12.1314	12.1226	12.2058	12.3064	12.4132	12.6855	12.5009	12.5214	12.5894	12.4351	12.6409
11.575	11.4006	11.3389	11.4005	12.0014	11.7306	12.0608	11.9117	11.7794	11.6391	12.1082	12.1577	12.4627	12.3096	11.8898	12.0782	12.2118	12.1649	11.9519	11.672	12.0928	12.1681	11.7944	12.0565	12.0039	12.1446	12.2053
12.3413	12.2328	11.5172	12.0869	12.3543	12.2656	11.4939	11.4568	11.9596	11.6221	12.3287	11.7244	12.3345	11.6778	12.3275	12.2804	11.8086	11.8599	11.8934	11.6816	11.6947	11.4089	11.8521	11.4986	11.7737	11.8819	12.0612
2.05099	2.05099	2.05099	2.05099	2.05099	2.05099	2.05099	1.98217	4.25026	1.92889	3.07859	1.98112	2.0304	1.9819	2.35559	2.45472	2.67603	3.35974	3.19171	3.46584	3.46584	3.06794	3.06539	3.35974	3.46584	3.06539	3.57081
10.2928	9.9606	10.6219	10.4918	9.50921	9.95113	10.2727	10.5865	10.1855	10.9304	9.98767	10.6008	10.6791	10.3832	10.1057	9.63038	10.1997	10.5031	10.3489	10.3859	10.6763	10.1487	10.34	10.118	8.76929	9.51402	9.77626
10.7704	10.2348	11.3024	11.4059	10.362	10.9294	11.5348	11.6239	11.4053	9.98258	10.7653	12.1983	11.1969	11.1596	10.5798	10.5163	11.1279	12.0446	11.894	11.9453	12.2486	11.5864	11.9132	11.8345	10.3498	10.8886	11.1754
12.313	12.4448	12.1947	12.4436	12.8839	12.6152	12.5952	11.5142	11.4924	11.9661	11.8633	11.8577	12.0535	11.7528	12.14	11.8138	11.7203	11.4847	11.628	11.5871	11.7845	12.0504	11.8728	11.9009	11.7822	11.7207	11.9112
10.9873	10.9774	10.9899	10.8117	11.138	11.2886	11.7357	11.8343	11.9563	10.7681	11.5043	11.8396	11.5608	11.6865	11.3221	11.4251	11.3767	11.5842	11.6993	10.9304	11.281	11.2902	11.4166	11.6122	11.7548	11.7837	11.7032
8.21305	8.36266	7.89137	8.34783	9.11712	8.24965	8.24965	11.3897	10.6811	10.5151	11.0665	9.66971	9.68964	10.1694	11.375	10.6711	10.6412	9.13264	8.14596	7.31883	9.53472	10.0914	8.17999	10.1178	10.455	10.5477	10.5477
7.39165	7.38331	6.36643	7.04821	8.47114	8.19501	7.69071	8.98997	9.50884	9.21385	9.82105	7.44622	5.0346	9.47688	9.41855	9.47656	9.6241	7.95813	7.25242	7.61712	8.16251	8.04917	8.46299	8.55291	8.92142	8.94955	9.14545
12.2503	12.4182	12.4602	12.7183	12.6492	12.7412	12.6507	12.9007	12.9839	12.9131	13.1367	13.1134	13.0403	12.9709	12.7811	12.8611	12.6322	13.0543	13.2481	12.6461	13.5307	13.6131	13.2533	13.4455	12.8913	12.8316	13.1126
11.6661	11.0349	11.5543	12.2209	10.0676	10.7385	9.81914	10.1679	9.78189	10.4515	10.3454	10.132	10.7462	10.3258	10.1168	10.6576	10.5108	12.8307	12.2565	12.7546	12.431	12.2568	12.4896	12.1736	10.2688	10.5177	9.95585
14.9724	14.8974	14.9497	15.0005	14.7981	14.8721	14.8469	15.0283	15.0014	13.7347	15.0025	14.9307	15.0964	14.9592	14.9069	14.8446	14.8968	14.8535	14.7494	14.8723	14.8554	14.8859	14.5976	14.712	14.9698	14.8564	14.9562
9.01028	8.64722	9.21738	8.95793	8.97715	8.93474	9.38579	9.72924	9.79143	7.94313	9.42727	9.29105	9.25948	9.45423	8.32788	9.32208	9.56202	10.252	10.245	10.2412	10.3674	10.5286	10.6379	10.0535	8.77541	9.20431	9.1228
9.34584	9.62443	9.85843	9.56378	8.739	8.78973	8.89146	9.13823	9.55206	6.49887	9.223	8.57262	8.28486	9.17604	7.87452	9.19038	9.52177	9.83765	10.0111	10.59	10.4042	10.0285	9.63485	9.32585	8.3578	9.37933	8.7835
13.5168	13.3848	13.5738	13.4285	12.4012	13.3848	12.901	12.5792	12.6818	13.2926	12.6719	12.8889	12.9168	12.6239	12.7749	12.7334	12.8694	12.8695	12.7379	12.9725	12.8424	12.5899	12.9258	12.503	12.7961	12.7437	12.6227
10.0745	9.79063	9.94695	9.90509	8.99243	9.58274	9.84917	10.8416	10.9836	8.69836	10.7628	10.757	11.2252	10.8195	10.2308	10.4655	10.9584	10.9631	10.3422	10.8049	10.614	10.458	10.3431	10.3455	10.5194	10.6425	10.5857
12.6905	12.1665	12.5641	12.3995	12.0753	12.2207	12.2945	12.2928	12.1667	12.32	12.2247	12.4122	12.6119	12.4946	12.4811	12.167	12.6423	12.6153	12.4072	12.3742	12.49	12.2548	12.3158	12.335	12.0913	12.0874	12.3019
8.8108	8.15558	7.80059	8.0659	9.4002	8.38694	9.20689	9.01981	8.28301	7.23031	8.25449	7.93076	6.16254	8.41673	7.7178	7.95417	8.69381	8.05944	7.43017	6.94769	8.41323	8.80949	8.03996	8.64979	8.29841	8.26744	8.94435
12.1157	12.0505	12.0673	11.9355	12.4485	11.8556	12.1225	10.5732	10.3299	10.4842	9.8302	10.7302	9.64352	10.3274	10.2747	9.76723	10.1856	10.2851	9.94954	9.54442	10.5542	10.2779	9.93399	10.5601	10.0636	10.5225	10.5154
12.3366	12.7143	12.1688	12.2316	12.3011	12.366	12.3366	11.5473	11.6098	11.6784	12.0358	11.9432	11.9609	11.3549	11.3664	11.7101	11.5395	11.706	11.6137	11.1275	11.8179	11.2924	11.5668	11.8881	11.828	11.6174	12.0381
12.8817	12.3702	13.7267	13.4965	12.3735	13.0209	12.8623	12.0821	11.8324	11.2982	12.5535	12.2018	12.4178	12.2262	12.2866	11.8688	11.7792	12.3197	12.0772	11.6462	12.0561	12.0106	12.0223	12.0017	11.9118	12.146	11.9979
9.06879	8.95418	9.10952	9.17429	8.75975	8.74185	8.76086	9.66014	9.48999	7.99742	9.75488	9.10989	9.8495	9.56362	9.4316	9.54499	9.79918	9.73769	9.84265	10.247	10.0894	9.34947	9.9434	9.30746	10.1577	9.32726	9.54736
12.9748	13.0448	12.8522	12.9119	12.5233	12.6483	12.4823	11.5036	11.2421	11.1617	11.3045	11.3332	11.9565	11.8291	12.1797	11.8989	11.8507	11.6123	11.5167	11.9317	11.5255	11.4752	11.6353	11.5102	12.1342	11.7711	11.6481
7.27262	7.0892	6.99898	7.86303	7.4811	5.68832	6.75481	7.77921	8.21828	3.31587	8.26432	6.70311	5.41618	8.42252	7.70714	7.88852	8.57393	9.42496	8.98425	10.0076	8.98315	7.96704	8.23518	8.02459	8.01023	7.69427	7.69099
11.2654	11.1272	11.1971	11.4164	10.7571	10.686	10.9999	10.0978	10.384	9.20005	10.2735	10.0765	9.73096	10.2935	10.6389	9.8782	10.2881	10.4034	10.3289	11.0049	10.5324	9.91614	10.1698	10.1695	9.59969	9.99776	10.0407
11.9653	11.6576	11.7069	11.6576	11.0845	11.701	11.4584	12.1195	12.4043	11.4659	12.3358	12.1586	12.5668	12.1303	12.1383	12.3493	12.2586	12.4385	12.0715	12.2616	12.1336	11.7356	11.9242	11.9697	11.7823	11.9821	11.9032
7.87105	8.32755	8.2461	8.16587	8.56132	8.68375	8.97016	9.89897	9.79473	9.26115	9.85427	10.0406	9.36019	9.85984	9.38806	9.36107	9.31954	9.48804	9.08872	8.99739	9.45519	9.68892	9.17066	9.73878	9.21051	9.48916	9.80146
13.6802	13.3592	12.3378	13.4619	13.9125	13.9153	13.652	13.0847	13.4804	13.3233	13.7315	12.8727	12.7028	13.3938	13.5423	13.6695	13.5144	12.4536	13.1802	13.1107	12.8426	13.3631	13.588	13.4102	13.1591	12.9061	13.1432
12.6791	12.4	11.8522	12.8065	13.1503	12.977	12.5506	12.9775	13.2534	12.4166	13.287	12.2612	11.5474	13.1212	12.9915	13.329	13.1505	13.155	12.976	13.5937	13.256	13.2438	13.7339	13.3711	12.9364	12.6194	12.9649
9.99046	9.84826	11.5357	11.4724	11.6051	11.5889	11.0625	8.91781	8.97786	6.81398	10.1136	8.03175	10.051	8.87668	8.7419	8.71344	8.36724	8.23437	8.67064	7.63266	8.7755	9.36499	8.75686	9.42222	8.59227	8.89083	9.17038
12.1529	11.8632	13.2977	13.3694	12.1034	12.8133	12.606	12.0681	11.7375	9.05282	12.5818	11.7612	12.5634	11.909	11.8141	11.5235	11.4804	12.2374	11.9502	11.4254	12.2286	10.6925	11.6968	12.003	11.5823	11.9756	11.8203
13.6735	14.0697	13.6893	13.508	14.3551	14.4017	14.2022	5.43656	5.10537	8.74656	5.33357	5.10537	5.71642	7.21233	7.21233	7.21233	7.21233	7.00162	6.94902	6.90452	6.56081	7.91759	7.76187	7.85182	8.58318	8.89451	8.29559
14.164	14.4463	14.0495	13.9102	14.7486	14.6821	14.598	14.9909	15.1493	14.8077	15.3017	15.2075	15.1972	15.0653	14.9337	15.1229	15.0257	14.4618	14.5977	14.2044	14.1628	14.8586	14.7992	14.8959	14.8884	14.9804	14.909
11.7347	11.4191	11.5372	11.789	12.3945	12.1163	12.3032	12.3029	11.9139	12.5711	12.5377	12.6057	12.2358	12.1547	12.0632	11.8967	12.1548	12.2807	12.1273	11.8051	12.3853	12.8968	12.4575	12.5393	12.2381	12.2648	12.6111
11.5096	11.077	10.6195	11.291	11.5837	11.4325	11.0892	10.4253	11.1495	11.1929	11.3468	10.9365	11.824	11.2019	11.5216	11.4319	11.3845	10.9104	11.2519	11.4915	10.497	10.8249	10.6685	11.1429	11.06	11.1794	11.0503
13.0427	12.3879	12.8277	12.8097	12.1668	12.2554	12.5172	13.1494	13.0873	12.6785	12.6211	12.8636	13.1764	13.1158	13.4771	12.9531	13.2944	12.9761	12.6483	13.2289	13.1065	12.3316	12.7261	12.7016	12.6164	13.071	12.71
8.68474	8.27637	8.68387	8.56709	9.52477	9.26178	9.05804	8.0409	8.14768	7.96007	8.07075	8.07033	7.56616	8.37958	8.16034	7.96007	8.28671	7.88951	7.74368	7.91392	7.8727	8.53131	8.00357	7.9288	7.80052	7.86717	8.46583
8.77871	8.50264	8.6506	8.00987	7.2587	7.86822	7.43762	11.2431	11.2573	11.073	10.3246	10.5466	10.2556	11.4824	11.3524	11.5104	11.2327	11.4505	11.0839	10.8767	10.6636	11.1689	10.9995	10.9254	11.5172	11.1214	11.8146
11.2236	11.3726	11.7982	11.2523	10.0677	10.8875	10.6538	11.9366	11.7851	11.7015	11.0192	11.8372	12.0276	12.1658	11.7952	11.7368	11.6602	11.8585	11.7499	11.2643	11.5524	11.5714	11.4898	11.284	11.9744	12.0828	12.108
10.9029	10.7519	10.3701	10.8186	11.6353	11.1938	11.3479	11.9953	12.2936	12.2724	12.4441	11.6839	9.47849	11.8366	12.328	12.5157	12.3735	12.215	11.5453	11.212	11.8468	12.1425	12.3028	12.2283	12.1601	12.634	12.2824
3.80996	3.97604	3.82037	3.80996	4.66912	3.80996	3.82037	4.89296	5.13262	2.83285	4.84485	3.29766	3.29766	4.13343	3.70152	4.13343	4.31718	4.45939	5.44134	4.61734	3.79153	3.78421	4.32727	4.94797	3.88778	3.78421	5.44134
10.985	10.775	10.6834	10.7984	11.2857	11.5018	11.3689	10.2485	10.2242	10.2391	10.5897	10.6562	10.4501	10.2485	10.1995	10.0278	10.0602	9.85067	9.81147	9.88311	9.7038	10.0514	10.2306	10.2019	10.2075	10.0861	10.4688
6.62954	6.54513	6.25551	6.54513	7.59667	6.90737	6.62954	7.50804	8.08412	7.65783	8.60622	7.99355	6.73673	7.96562	8.61858	7.9447	8.02846	7.83154	7.13054	7.41801	8.05375	8.21511	7.83154	8.2434	7.89346	8.18279	7.44378
11.0225	10.4581	10.436	10.3056	10.9655	10.9375	10.7012	11.7978	12.1965	10.3185	12	11.17	11.2542	12.4762	11.4033	12.2008	11.9741	11.2984	10.9623	11.6211	11.4755	10.7769	11.8408	11.4097	11.8476	11.574	12.2616
13.0192	12.918	12.6458	12.634	12.5177	12.6661	12.5176	13.2679	13.4826	13.0922	13.6473	13.1957	13.477	13.4226	13.0181	13.5432	13.4807	13.1004	12.648	13.2817	12.764	12.6948	13.139	12.685	13.2014	13.1307	13.3098
8.46603	8.70604	8.1763	8.51631	8.2259	7.84989	7.96173	7.89234	8.69289	6.19826	7.73416	4.93116	3.25783	7.75125	6.71976	8.15287	8.36161	7.56973	6.74264	7.93051	7.52453	6.7296	6.86282	6.90604	7.16053	7.32334	6.81993
9.35689	7.7858	8.95014	10.7952	9.8693	9.91814	9.86614	8.651	9.50986	9.48619	9.758	9.02876	7.70307	8.83074	8.97806	9.21904	8.08159	10.374	10.301	10.6531	10.8617	11.4804	11.5077	11.2325	8.53422	8.573	8.45221
8.18727	7.96944	8.59559	8.49125	8.01425	8.41502	8.41502	8.66498	8.63744	7.98258	9.22585	8.4379	7.56235	8.94745	8.9591	8.95836	8.91572	8.78059	8.38336	8.4731	9.00062	9.52206	9.04058	8.84738	8.75881	7.84877	8.7876
11.675	11.6917	12.0719	11.3547	11.7539	12.0986	12.0045	13.0417	13.0213	13.0046	12.7621	13.3566	12.7864	12.8119	12.792	12.7268	12.5267	12.6409	12.6053	12.1141	12.6677	12.8154	12.9879	12.9245	13.0738	12.8671	13.0232
11.0859	10.6852	10.6852	10.6966	10.24	10.2739	10.7327	10.3674	10.7165	8.01837	10.6032	9.91659	10.9329	10.4117	9.62366	10.6759	10.6348	10.6811	9.78703	10.2604	10.3423	9.27597	10.0474	9.7191	10.1807	10.1259	10.0895
7.30983	7.47413	7.76175	6.78404	6.66355	6.47943	6.62869	4.08398	3.63313	4.44351	3.97014	5.88019	4.7155	5.59327	4.93218	4.11769	4.44351	5.18299	4.57468	4.85945	4.71774	3.75016	3.36644	3.77265	4.86656	4.58322	3.45234
10.1148	10.1487	10.3235	9.98768	10.0865	10.1148	10.1148	10.6027	10.9203	10.3646	11.1105	10.7847	10.9664	10.7569	10.0786	10.762	10.7623	11.1081	11.0324	11.2033	11.473	11.339	11.0187	10.9799	10.6236	10.712	10.625
2.05099	2.05099	2.05099	2.05099	2.05099	2.05099	2.05099	2.04499	2.06598	2.01852	3.86245	2.01852	2.01852	2.07717	2.98472	2.07351	2.05532	2.29214	2.29214	2.29214	2.29214	2.29214	2.29214	2.29214	2.29214	2.29214	2.29214
12.3182	12.2672	12.388	12.4312	11.588	12.1677	11.6914	10.9909	11.4913	11.8312	12.2482	11.445	11.644	11.8777	11.8197	11.8211	11.8938	11.9488	11.788	11.4378	11.986	10.7344	11.4469	11.6413	11.8806	12.0681	11.591
9.76242	9.86502	9.55541	9.27245	10.7587	10.8365	10.5696	10.189	10.6909	11.8426	11.0219	10.7839	10.5234	10.8657	10.2709	10.5672	10.6898	10.4374	10.2749	9.86472	10.4204	10.7201	10.4593	10.825	11.2674	10.9315	11.2627
12.7408	12.6036	12.6425	12.6518	11.3197	12.0206	11.907	12.0814	12.3822	12.1351	11.9705	12.2477	12.7192	12.3663	12.4241	12.3621	12.323	12.7538	12.0596	12.8444	12.496	11.5745	11.8966	12.1076	12.3516	12.2518	11.9001
6.03884	6.04227	6.04227	6.91146	5.91208	4.89506	6.04577	5.94231	6.4947	5.78273	5.71613	5.92327	3.97905	5.92327	5.46114	5.81821	5.92327	7.38296	5.9293	6.86889	6.90209	6.72912	6.51307	6.51307	4.4498	6.7479	5.04132
14.0426	14.1611	13.6397	13.4277	14.2685	14.1745	14.3037	14.2202	14.2039	14.3115	14.3893	14.01	13.6881	14.3233	14.5736	14.1165	14.2931	13.6622	13.9088	13.3099	13.7232	14.1217	13.9249	14.2729	14.3754	14.4873	14.5897
13.8512	13.9878	13.7785	13.4014	14.2219	14.335	14.2484	14.61	14.637	14.3085	14.6596	14.6269	14.6659	14.5592	14.4623	14.4486	14.4116	13.8375	13.9736	13.6183	13.787	14.005	13.9637	14.1799	14.5771	14.4597	14.6735
2.05099	2.05099	2.05099	2.05099	2.05099	2.05099	2.05099	2.06829	2.06829	2.06829	2.06829	2.06829	2.06829	2.06829	2.06829	2.06829	2.06829	2.11919	2.11919	2.11919	2.11919	2.11919	2.11919	2.11919	2.11919	2.11919	2.11919
12.835	12.7265	12.5761	12.7484	12.686	12.6031	12.5849	10.3528	11.0764	10.7189	11.2525	11.0251	11.3355	10.9099	11.526	10.9703	10.7528	10.3125	10.9465	10.9969	10.4031	9.92325	10.0522	10.236	10.8587	10.6838	10.3364
12.1528	12.1217	11.6305	12.0631	12.4839	12.2707	12.3196	10.6751	10.6709	11.4315	10.5129	10.686	11.2703	10.6638	11.1482	10.6538	11.0167	10.7605	10.761	10.401	10.7678	10.8719	10.7048	11.0998	11.0001	11.1534	11.3031
9.34993	8.96697	9.32792	9.38608	10.2522	9.67329	9.89962	10.4865	10.4935	10.3718	10.4076	10.45	11.121	10.3965	10.5924	10.4099	10.8507	11.1525	10.757	10.3734	11.0876	11.3902	11.2454	11.13	10.5823	10.6381	10.6754
12.672	12.5882	12.9362	12.659	12.0235	12.2359	12.3323	13.2676	13.1539	12.421	13.1059	13.2616	13.4363	13.2793	12.2411	12.6126	12.8614	13.1272	13.2436	13.5078	13.2753	12.7402	12.7566	13.0729	12.919	13.1728	13.052
13.3948	13.3422	13.6921	13.4349	12.764	13.2275	13.1487	13.1325	12.9721	13.11	12.7652	13.4063	13.0822	13.0379	12.6282	12.6605	12.7479	13.3535	13.084	13.4261	13.1497	12.715	13.2362	13.237	13.011	13.1969	12.9196
11.4155	11.1103	11.322	11.1126	10.7889	10.9012	10.8919	12.1089	12.1611	12.3167	12.2818	12.023	12.5503	12.4416	12.2453	12.5373	12.6227	12.4242	11.778	12.0973	11.6717	11.6944	11.7241	11.6348	12.1554	12.3015	11.946
9.94912	9.39706	8.23319	8.70698	9.33925	9.00824	8.87241	10.5875	10.6621	8.6503	10.671	9.0772	9.72891	10.607	10.2459	10.8752	10.8665	10.7888	9.59954	9.6293	9.85096	9.45932	9.41633	9.96783	10.7491	10.7155	10.6003
12.1586	11.893	11.0265	11.3813	11.8511	11.7073	11.6683	11.9918	12.3122	11.5421	12.1295	11.2995	11.1674	12.0988	12.2502	12.2511	12.1778	11.9309	10.9769	11.4408	11.3875	10.8742	11.3985	11.7671	12.3119	12.0765	12.1516
9.11003	9.4694	9.5516	9.2664	9.06136	9.15833	9.33994	11.1866	11.1188	11.1724	11.1672	11.1531	9.44133	10.8413	10.8279	10.8428	10.6213	10.87	11.0631	10.5416	10.8948	10.8397	10.8035	10.901	11.3378	10.8795	10.5992
15.0394	14.9598	14.9128	15.0168	14.8715	14.8326	14.9058	14.8711	14.8813	14.7511	14.9117	14.908	14.9511	14.946	14.8106	14.8623	14.9044	14.7256	14.7254	14.8181	14.8798	14.7563	14.5953	14.8378	14.8847	14.7598	14.9132
10.8031	10.7157	10.418	10.3445	11.4186	11.1117	11.3395	10.7743	10.9987	9.55109	10.9371	10.6195	10.6628	10.9162	9.90706	10.8844	10.79	11.071	10.3907	10.0611	11.0101	11.6778	11.0459	11.3267	11.1244	10.9546	11.4391
3.96784	3.8285	3.96913	4.05538	4.36893	3.96784	3.98985	2.54366	2.54366	2.54366	2.54366	2.54366	2.54366	2.54366	2.54366	2.54366	2.54366	2.83264	4.51978	4.25625	2.83219	3.72561	4.74771	2.99268	1.72583	1.78767	1.7513
2.34648	2.34648	2.34648	2.68318	2.34648	2.34648	2.34648	2.04894	2.04894	2.04894	2.04894	2.04894	2.04894	2.04894	2.04894	2.04894	2.04894	2.26142	2.9737	2.5974	2.17592	2.17592	2.17592	2.17592	2.17592	2.17592	2.17592
12.7457	12.602	13.1018	13.174	12.6339	12.7457	12.6926	11.2049	10.2305	11.3114	11.5406	10.8795	10.7132	11.3284	11.617	11.2756	11.418	11.3149	11.8819	12.1299	11.7474	11.6958	12.1221	11.668	11.4705	11.536	11.5607
7.35923	7.67731	7.60314	7.47881	7.88938	7.76111	8.21777	9.40935	9.40804	9.37004	9.06835	9.86806	8.44433	8.8896	8.01101	8.52384	8.66496	8.48349	8.61714	8.41981	8.61374	9.38012	9.0717	8.98247	8.66775	8.58316	8.66431
9.81805	9.40932	9.65762	10.0329	10.4508	10.3458	10.6945	10.1129	10.0668	10.0497	10.3352	10.8121	10.6082	10.1591	10.5393	10.1584	10.0147	9.95731	10.2421	9.75322	9.95435	10.4151	10.0469	10.0149	10.187	9.81134	10.2068
9.2696	9.04899	8.40742	8.75379	10.501	9.99498	10.1794	8.55136	9.15077	6.25713	9.17515	8.28105	7.76321	9.29728	8.39435	8.99251	9.13692	8.79147	8.7474	7.86116	8.28827	8.53218	8.89039	9.2528	9.64146	9.26852	9.52394
9.81703	10.0677	9.46902	9.41579	10.3437	10.1705	10.3478	8.73804	9.38133	9.99245	10.0833	9.90777	9.74375	9.72393	9.92649	9.5712	9.70198	9.52053	9.40391	8.95462	9.23091	9.72492	9.28753	9.60749	9.95002	9.83905	9.81725
13.1877	12.9316	12.4836	12.7854	12.0467	12.3119	11.83	11.9132	12.2151	11.9326	12.2719	11.8954	12.6368	12.0642	12.635	12.7672	12.7183	12.7179	12.2473	12.8787	12.5744	11.4615	12.0769	11.8347	12.196	12.2379	11.8573
12.5124	12.4898	12.4383	12.5182	12.2864	12.5156	12.6592	11.6908	11.4743	11.3733	11.6328	10.2523	10.5304	11.192	11.6298	11.2042	11.3611	11.2144	11.5438	11.6717	11.2179	10.9102	11.517	11.5203	11.4534	11.3484	11.5003
9.52685	9.60927	9.46167	9.60927	10.215	9.91036	9.64855	11.668	11.9288	11.9078	12.0132	11.8284	12.1583	11.7138	12.0466	11.8059	11.9933	11.6966	11.373	11.7864	11.9204	12.286	12.1985	11.9842	11.6375	12.0129	11.7667
12.4723	12.6935	13.1067	12.9239	12.356	12.6508	12.7534	10.2971	9.90837	9.90607	10.0252	10.4861	10.0232	10.1592	9.94826	10.0609	9.87747	10.0927	9.85811	10.4083	10.111	10.0572	9.82702	9.90028	9.95531	10.0483	9.79378
5.48873	4.88442	5.34586	4.53009	3.89512	4.53009	4.77419	4.40142	7.57811	5.25557	6.81244	5.66266	8.2021	7.24651	8.34885	8.12729	7.01606	4.72396	5.07168	6.03208	4.94498	5.17971	4.90491	5.19916	6.20028	6.07081	5.87007
11.4705	11.6664	11.2318	11.5889	12.1561	12.0747	11.7689	12.1493	11.9647	12.2674	12.0493	12.5185	12.5114	12.2868	12.394	12.2784	12.4793	11.6915	12.0419	11.4974	12.0661	12.0575	12.0351	12.057	12.1692	12.0616	12.0669
14.3539	14.2596	14.33	14.4203	14.0923	14.1954	14.1313	13.2125	13.0368	12.9974	13.389	13.2948	13.7485	13.1676	12.496	13.1459	13.1917	13.1698	13.0704	12.6413	13.2678	12.6489	12.9597	13.1767	13.4046	13.2755	13.3197
11.5548	11.4247	11.7674	11.824	12.7203	12.8373	12.7656	13.4716	13.5747	13.3417	13.1978	13.2826	12.0823	13.2782	13.2442	12.9584	12.7334	12.5443	13.2096	12.4105	12.7449	13.4889	13.1964	13.4665	13.131	13.0602	13.1238
10.137	10.3822	10.2872	10.1437	12.1212	11.8767	11.3537	12.7067	12.6017	11.4962	12.5537	12.0894	11.0234	12.0162	12.0737	12.539	12.8377	11.7796	11.7157	11.728	11.8879	12.861	12.7606	12.6872	12.4193	12.4755	12.5616
9.30209	9.66124	9.17601	9.39804	11.9882	11.3635	11.0472	11.0797	11.1731	9.84265	11.1768	10.2994	9.13876	10.5633	10.493	11.3694	11.5136	10.4725	10.372	10.5168	10.5057	11.8244	11.671	11.4638	11.1815	11.2174	11.2973
10.9211	10.3966	10.7422	10.3497	10.3655	10.7476	10.662	10.7441	10.7395	11.1524	10.917	10.8745	10.8305	10.8515	10.9046	10.7441	10.767	11.1206	10.4355	10.7256	10.5969	10.5684	10.6651	10.6509	10.626	10.7009	10.7757
9.2742	8.8582	9.30038	8.8582	8.13012	8.50952	8.8582	9.94699	10.3274	9.24771	10.1461	9.813	10.1265	9.95819	9.99096	9.99282	10.1365	10.3973	10.2178	10.3418	10.1322	9.88103	9.81443	9.61598	9.46403	10.1682	9.53887
9.80216	9.50694	9.97427	9.81481	10.3003	10.0262	9.995	9.97586	10.4821	10.0361	10.215	9.98781	10.3026	10.3907	10.319	10.3553	10.6409	10.467	10.3273	10.603	10.5415	11.092	10.8587	10.5816	9.76766	10.2903	10.289
11.5667	11.7182	11.4298	11.5614	11.5667	11.7716	11.1691	11.3922	11.5099	11.2984	11.7837	11.5481	11.683	11.4922	11.7312	11.9205	11.7364	11.5687	11.6171	11.4652	11.5155	11.3083	11.4503	11.4496	11.4145	11.4466	11.6335
8.88867	9.19173	8.33738	9.18854	10.2296	9.67666	9.30245	9.91974	10.2433	7.67119	10.7217	9.49926	10.2347	10.0473	9.79187	10.6101	10.2531	10.033	10.6783	9.44875	10.1854	9.29781	10.2056	10.3937	10.085	9.73356	10.334
13.0273	11.9272	12.2752	12.0009	13.1761	13.1809	12.6349	13.1941	13.1646	12.7675	13.8112	13.1016	13.601	12.9723	13.9059	12.8095	12.8632	12.3397	11.5469	12.1412	12.0206	12.0773	13.318	13.6429	13.4039	13.549	13.0767
10.8582	10.4851	10.0472	10.3282	10.515	10.5711	10.4851	10.5804	10.8908	11.0472	11.1462	10.4392	11.0327	11.3586	11.4825	11.4702	11.5051	11.5096	11.0173	11.107	10.7079	11.0105	11.1483	11.0408	11.2611	11.2859	11.0633
10.9566	11.1584	10.8678	10.7316	10.8161	10.8101	10.9487	11.1396	11.0584	11.0825	10.7303	11.1752	11.1987	11.4536	11.4714	11.2082	11.3271	11.0808	11.0965	10.9201	10.7274	10.7915	10.6914	10.6497	11.1578	11.1034	11.4337
10.5987	10.7651	10.8396	10.5847	10.3843	10.5788	10.5987	11.6571	11.8069	11.8181	11.4564	11.8278	11.9755	11.8614	11.4171	11.7675	11.6698	11.7939	11.5659	11.3531	11.4009	12.0154	11.5822	11.4733	11.7686	11.8184	11.816
10.7845	10.4116	11.0872	10.9898	11.1513	10.9898	11.3839	11.9078	11.7934	11.3165	11.6371	12.1697	11.6242	11.616	11.4852	11.2147	11.2342	11.4547	11.4307	11.2366	11.6417	11.4229	11.0389	11.7321	11.5752	11.65	11.3843
7.96437	8.10286	9.19149	8.57228	8.7433	8.33303	8.65423	9.00995	8.78458	8.4091	7.23787	10.4573	8.01081	8.44381	8.29181	7.11819	7.22129	7.41457	7.65228	6.73254	7.84463	8.76925	6.8807	7.44037	6.60754	7.6726	7.82564
10.2273	10.2273	11.3615	10.4981	11.0413	10.9498	11.9175	11.1329	10.8237	10.4221	9.69946	11.7832	10.4986	10.7293	10.5158	9.68154	9.76735	9.56317	9.8192	9.52097	9.48395	10.6358	9.78965	10.3974	10.3439	10.2064	10.3641
12.7675	12.4653	12.4348	12.6524	13.6252	13.3426	13.3494	13.432	13.5268	12.7304	13.6319	13.5114	13.7735	13.4018	13.8725	13.5905	13.5801	12.9108	13.2525	12.9244	12.7491	13.5421	13.1477	13.1355	13.164	13.3458	13.2036
9.0719	8.06485	8.42566	9.45336	10.2006	10.1717	9.45191	9.08311	9.97114	10.2616	10.0536	8.03282	8.82363	9.42628	10.3014	10.3865	10.3725	8.86484	9.56299	10.1634	8.9278	10.288	10.0347	9.45449	9.17066	9.33383	8.51315
11.3618	11.0139	12.0839	11.5526	11.877	12.1176	12.4753	11.8117	11.9732	10.7236	11.5246	11.7114	10.7855	11.6431	12.1759	11.846	11.7521	12.0275	11.3934	11.1704	12.2687	11.984	12.2448	11.9506	11.3402	11.1804	11.0859
12.2636	11.8455	12.2937	12.0935	11.6275	12.202	12.0855	12.3885	12.4584	11.2476	12.2925	12.1162	11.7633	12.1487	12.449	12.3677	12.2589	12.3256	11.8058	11.5504	12.3677	11.6234	12.2034	11.9048	11.9842	11.5495	11.6812
14.2295	14.1053	14.1946	14.2033	13.8738	14.0722	14.0318	13.2775	13.4548	13.0666	13.2445	13.3998	13.0011	13.074	13.5893	13.2557	13.2233	13.279	12.7542	13.0181	13.1275	12.5493	12.9135	13.0222	13.0004	13.0033	12.7809
11.5564	11.547	10.5664	11.6715	11.6531	11.7366	11.3843	11.3802	12.3018	12.2158	12.3448	11.5063	11.9226	12.0508	12.4271	12.7969	12.5402	12.2907	12.0419	12.2635	12.0818	12.1023	12.7565	12.6013	11.7167	11.7874	11.1235
7.53576	7.78754	8.07133	8.42334	8.22318	7.93529	8.27358	7.84517	8.23263	7.30113	7.95633	7.52927	7.32995	7.76861	6.69622	7.89768	8.19557	9.44339	10.1144	8.59394	10.1442	9.74337	9.44572	9.74491	7.51219	7.64546	8.59109
7.84462	7.90439	7.35164	7.83302	7.95734	7.84462	7.89782	6.93114	6.61883	7.15627	7.08902	7.20983	7.25621	5.66661	4.74769	5.94265	6.00694	6.78449	6.23015	4.87893	6.58549	6.47769	5.72239	6.82099	5.50847	6.17061	6.62781
12.6082	12.4756	12.8356	12.6553	10.9441	12.2867	12.0048	11.6967	12.1315	11.6486	12.138	11.666	11.8013	11.8099	12.4112	11.8198	11.6497	12.7848	12.2276	12.5588	11.9257	11.8236	12.5382	12.3537	12.2317	12.1672	11.974
9.31739	9.8336	8.41988	9.44263	10.2748	9.66356	9.93721	10.7114	10.7255	11.1036	10.9168	10.8155	9.98774	10.7211	11.0295	10.841	10.7395	9.92554	10.2506	9.35168	9.7984	10.5641	9.9176	10.4051	10.0855	10.1217	10.8138
7.39208	8.35303	7.22401	8.01821	9.67794	8.90315	8.86815	10.041	10.1667	10.4511	10.8831	9.71396	7.05055	10.4839	10.0514	10.3996	10.5322	8.78563	9.19263	9.10844	9.192	10.0274	9.77203	9.7736	9.74869	9.9395	9.95362
10.3296	10.3592	10.4433	10.0539	9.70374	10.0971	10.0692	10.7268	10.7046	9.79906	10.623	10.4989	10.6731	10.4457	10.0027	10.2213	10.6392	10.7807	10.9134	10.5472	11.07	9.80975	10.4319	10.6249	10.0744	10.8526	10.5426
10.1233	10.1503	10.2178	9.79888	9.71368	9.94718	9.62779	10.6603	10.7025	9.61111	10.8898	10.984	11.1944	10.4703	10.2754	10.4109	10.8103	11.1464	10.9611	10.5653	10.7421	10.4298	10.18	10.3441	10.5101	10.9697	10.8675
8.8076	9.04393	9.29606	8.63451	7.5412	8.29301	8.03848	10.3128	10.305	10.2871	10.3002	10.7516	11.0031	10.3684	10.6358	10.3452	10.6079	10.2575	10.3477	9.89757	10.0902	9.8292	9.65583	9.55266	9.93001	10.4586	9.908
11.9575	12.0381	11.8065	11.7249	10.9413	11.4276	11.3767	9.35427	9.03151	9.58524	9.05972	9.41419	9.84718	8.9577	9.32518	8.97948	9.31802	9.855	9.26563	9.47094	9.60519	8.99349	8.79277	9.13411	8.69949	9.14613	8.88068
11.8074	11.5596	11.7989	11.8228	11.1149	11.2911	11.3389	12.1213	12.119	11.1222	12.108	11.9574	12.5054	12.0389	11.1473	11.941	12.3786	13.4284	12.2532	12.9921	12.7501	12.3561	12.5735	11.8004	11.1056	11.8299	11.851
8.52816	8.77938	9.22925	9.11941	9.05877	8.91859	9.33405	9.76063	9.45056	9.27432	10.0506	9.73688	9.09963	10.0124	9.70216	9.11219	10.0043	9.76104	9.79201	10.0445	10.3999	9.87765	9.94056	10.1749	8.82885	8.90539	9.69323
7.82265	8.46741	8.051	8.40051	8.61502	8.2352	8.2352	8.34548	8.19879	7.16598	8.68116	8.20838	7.71835	8.41847	7.84448	8.5458	8.50511	9.74846	9.79066	7.68929	10.3448	9.15588	9.28511	9.12853	7.76396	8.38393	8.99234
12.9914	13.2889	13.2416	13.5022	12.9769	13.1283	12.9895	12.013	11.7763	12.4735	12.3033	11.9938	11.8599	12.2237	11.842	12.1295	12.2201	12.8502	12.3762	12.1041	13.0444	12.409	12.5931	12.4547	11.9098	12.1105	12.1266
8.88532	8.1773	8.06687	9.07857	10.3075	9.74465	9.80672	8.74207	8.85099	9.74156	9.45036	8.75363	8.74207	9.3608	9.90127	9.02589	9.58415	8.74134	8.66706	8.65577	8.80186	9.32638	9.3311	9.56698	8.56096	9.08169	8.85934
10.707	10.707	10.5949	10.621	10.8486	10.7159	10.7304	9.87326	10.114	8.84467	9.73134	9.54851	8.80041	9.35191	8.58725	9.73534	9.25592	10.4057	9.96598	9.61514	9.78751	10.109	10.3907	9.70371	9.2493	9.08185	9.36787
11.871	11.9666	11.678	11.7432	11.9873	11.9913	12.0107	11.5536	11.5984	11.9008	11.69	12.0232	11.9233	11.6608	11.1591	11.4308	11.4496	11.6185	11.4909	11.2035	11.1435	11.6753	11.4253	11.4331	11.4672	11.5257	11.9103
7.76433	7.76433	8.21815	7.76433	7.76433	7.76433	7.76433	8.8546	8.96546	7.3183	9.24111	8.9393	8.61164	9.1932	9.41032	9.40141	9.01984	8.46417	8.42791	8.20393	8.5506	9.83772	8.69058	8.90866	9.36877	8.7878	8.97144
12.7833	13.24	12.4982	12.7256	13.3626	13.0724	13.3373	12.1554	12.1639	12.4331	12.2562	11.9922	11.3475	12.1884	11.9504	12.4377	12.2657	12.0721	12.6546	12.9331	12.1452	13.1107	12.4584	12.3968	12.2094	12.2429	12.577
13.221	12.4783	12.4937	12.6576	11.7804	12.2175	12.5327	13.4886	13.7349	11.8241	13.8237	13.5438	13.7938	13.4266	13.6212	13.7939	13.6237	13.6249	12.61	12.2076	13.1996	12.1456	12.3689	12.6207	13.1039	13.1164	13.2196
2.16624	2.16624	2.16624	2.16624	2.38403	2.16624	2.77371	4.40102	3.78076	4.46875	3.56298	3.73192	3.56298	3.56298	3.56298	3.56298	3.49299	3.70462	3.74732	2.82696	3.70462	3.81158	3.70462	3.70462	3.51485	3.74732	3.7091
10.7784	10.572	11.2525	10.7194	11.1257	11.3406	11.8123	12.2483	12.2532	11.7637	11.5554	12.8332	12.2343	11.9158	11.8252	11.5447	11.577	11.5637	11.5322	11.1677	11.1742	11.8405	11.4444	11.4995	11.759	11.7105	11.7417
13.3588	13.0515	12.5831	13.1482	12.9719	12.8916	12.6864	12.2839	12.4153	9.09539	12.4611	9.47928	7.33361	12.3325	12.1018	12.6204	12.5919	11.9319	11.797	12.467	12.0569	9.93283	11.9923	11.685	12.3305	12.2754	11.7728
13.3004	12.8895	12.6478	13.0235	13.152	13.135	12.9677	12.5083	12.5388	10.3906	12.4666	11.4941	12.3401	12.7258	12.7348	12.8815	12.8028	11.925	11.6204	12.2409	12.0849	11.5055	12.3552	12.3501	12.7991	12.4418	12.064
13.6759	13.1689	13.1703	13.5866	13.4129	13.4524	13.4524	13.56	13.4433	13.0358	13.4805	13.4285	13.8484	13.648	13.8736	13.6834	13.6407	13.2827	12.6628	13.419	13.2364	13.0797	13.2961	13.1634	13.4389	13.089	13.1404
8.52331	9.1326	9.1326	8.83744	9.60249	9.3447	9.31764	10.2595	10.467	8.76055	10.2493	10.403	10.0521	10.09	9.90701	9.90922	10.0175	9.78641	9.44249	10.477	9.89252	10.6175	10.477	10.1485	10.0251	9.91858	9.58847
12.2543	11.4086	11.3566	12.0584	12.0695	12.4356	11.7897	12.2376	12.6206	12.3189	12.3586	12.3978	13.1335	12.2945	12.5959	13.0974	13.0243	13.2347	12.1818	11.985	12.4833	12.1885	12.2686	12.2892	12.208	12.4664	12.2667
10.107	10.6112	9.97423	9.69974	9.79758	9.79758	9.54063	10.1649	9.93562	10.1704	10.0858	10.2431	10.0038	10.3266	10.2961	10.1576	10.191	10.3473	9.42312	9.84669	10.2302	9.6572	9.29389	9.7346	10.1859	10.0624	10.0099
9.82691	9.90163	9.38804	9.16379	9.74439	9.42777	9.38363	9.29342	9.33004	7.66414	9.73972	8.68053	9.28638	9.42831	9.16349	9.51687	9.4445	10.1183	9.52366	9.00237	9.64205	9.85519	8.96664	9.38485	10.0569	9.79149	9.97859
12.5871	12.8472	11.9735	12.4185	12.6265	11.7809	12.0066	13.1001	13.0724	12.701	13.2117	12.0365	10.5523	12.866	11.911	13.0028	12.7547	12.8472	12.841	11.4958	13.1495	12.9098	12.4114	12.4137	12.8499	12.8373	12.9952
11.0029	10.8993	11.4248	10.347	8.80996	10.3627	9.77271	10.2121	10.0152	10.1312	10.0984	10.4236	11.1195	10.2547	10.44	11.126	11.0883	11.7673	11.3293	10.8675	11.2935	10.4217	10.799	10.6877	10.8215	11.0646	10.7497
9.51961	9.38943	9.29255	9.49787	8.07396	8.85527	8.42722	8.57551	8.83967	7.18805	9.06262	7.72709	8.50125	9.03734	8.75202	9.99256	10.2714	9.07573	8.3132	8.87008	9.04438	7.98391	7.79009	8.2055	9.32126	9.41595	8.52696
11.1566	11.1332	10.479	10.3907	9.56549	10.4881	9.82044	9.91298	10.0057	9.92206	10.2743	9.9023	11.1439	10.4078	10.9102	11.0439	10.9725	10.7046	10.007	9.77765	9.87756	7.90184	9.09583	8.95756	10.6912	10.6468	9.8831
10.3667	10.3816	10.5816	10.0186	8.64636	10.0186	8.97085	10.7678	10.7529	10.3108	10.3527	10.182	10.7486	10.876	11.2587	11.5981	11.6273	12.034	11.4798	11.1425	11.4793	10.4671	11.1429	10.9745	11.4544	11.6061	10.8095
7.0963	6.49377	6.65657	7.14251	6.93659	6.63896	6.85739	8.04441	8.7658	6.45166	9.30883	8.30072	9.6472	8.32128	8.5672	8.60756	8.91009	9.24434	6.89997	8.7611	8.55793	7.9079	8.71801	8.307	8.0119	8.38764	8.26904
12.2858	11.8506	12.3517	11.8506	11.5277	11.7028	11.7217	13.3334	13.5374	11.8687	13.64	12.9442	13.3664	13.2332	13.1669	13.3023	13.1802	13.6563	13.1139	12.3867	13.4013	12.5276	13.1404	12.9174	13.1503	13.5384	13.1645
14.1059	13.9746	13.9166	13.9183	13.6846	13.9183	13.8426	13.8222	13.996	13.7531	13.9878	13.7474	13.99	13.8005	13.9118	13.7591	13.7611	13.8832	13.7214	13.2588	13.9129	13.4892	13.8122	13.7905	13.9648	13.9763	13.8129
10.2971	9.77231	10.0457	9.77356	9.49363	9.85585	9.64928	10.3947	10.51	10.18	10.6747	10.3974	11.0222	10.7618	10.6397	10.7261	10.8681	10.3341	10.7962	10.3797	9.76903	9.9211	9.81951	9.78699	10.3241	10.7655	10.1659
10.5461	11.1634	10.8096	10.8934	10.9702	11.0555	11.1767	10.8878	10.7614	11.3512	10.2827	11.0521	10.6907	10.6148	10.9763	10.7116	10.5818	10.7058	11.2284	10.6006	10.7846	10.9691	11.0837	11.3379	11.4803	11.2604	11.4624
8.6821	9.3546	9.1495	8.6821	7.89959	8.54485	8.37964	8.82543	8.85064	8.82543	8.63312	9.08916	9.21795	8.82543	7.99087	8.82543	8.74466	8.48288	9.49813	8.88854	9.54722	9.05807	9.13349	9.31069	9.2653	9.16476	9.42043
7.57171	7.80453	7.63828	7.58419	7.57171	7.66558	7.54333	6.47438	6.47438	6.47438	5.83395	5.08997	5.09573	6.47438	6.59814	6.59814	6.03969	6.45576	6.78779	6.45576	6.45576	6.20423	6.46037	6.82491	7.60312	6.56394	6.97807
10.4293	10.402	10.1066	10.2971	10.2215	10.2024	10.219	9.65974	9.78417	9.21462	9.09136	10.2637	10.5959	10.1133	9.70767	9.78895	10.0225	10.1262	10.4719	9.73727	10.3555	9.3738	10.1213	10.2058	10.3196	10.0753	10.3783
11.5434	11.7391	10.7173	11.465	12.4313	11.9239	11.8	11.478	12.2142	10.7023	12.2492	11.0459	10.4991	11.7464	11.5375	12.2836	12.3324	11.0655	11.2528	11.1817	10.9683	11.0845	11.1672	11.3422	11.5494	11.723	11.7005
13.215	13.2006	12.762	13.1264	13.3934	13.1615	13.0851	12.8614	13.1755	13.2621	13.3011	12.9545	13.2398	13.037	13.1412	13.405	13.4729	12.5927	12.875	12.7044	12.5031	12.6027	12.3491	12.6628	13.0209	13.0313	13.0314
11.338	11.1146	11.8114	12.3281	12.3563	12.4741	12.1857	10.9537	11.2546	11.591	11.946	11.1722	11.8149	11.2064	11.7317	11.3772	11.3264	11.7872	12.0206	11.7996	11.9171	11.6327	11.6547	12.033	11.3859	11.2279	11.1987
14.0516	13.7418	14.1976	13.8808	13.0841	13.5409	13.4911	13.8346	13.2876	12.1049	13.4574	13.7092	13.617	13.2919	13.7046	13.2604	13.2036	13.6579	13.3439	13.8342	13.4413	13.1302	13.3819	13.319	13.6434	13.5058	13.4166
14.0696	14.0758	13.8808	14.1521	13.691	13.8971	13.7699	12.3947	12.1741	12.1354	12.4474	12.3279	12.4184	12.4238	12.7645	12.3684	12.2797	12.1146	12.3591	12.1261	12.1913	11.524	12.0783	12.0321	12.3206	12.3238	12.2075
13.9699	14.2091	13.8142	13.5772	14.3011	14.1958	14.2202	14.1113	14.1093	14.1186	14.1463	14.174	14.1322	14.2789	14.1131	14.2069	14.212	13.9775	14.3031	13.7796	13.8832	14.3321	13.99	14.3209	14.5776	14.5188	14.7119
12.4464	12.218	12.218	12.4197	11.9367	11.9974	12.1709	11.9636	12.1606	11.9726	11.8131	12.1372	12.7131	12.401	12.1473	12.5842	12.663	11.8037	12.0707	12.8905	11.2357	12.1645	11.2263	11.8875	11.5725	12.3993	11.7438
9.09183	9.39586	9.67123	9.30446	10.2935	9.64392	10.7469	9.30403	9.5738	8.30446	8.30446	9.62902	8.58569	8.63687	8.47987	8.30446	8.31905	8.00318	8.30915	7.76433	7.55449	8.70192	8.0244	8.83766	8.87919	9.01075	9.19206
10.8526	11.1119	12.2207	11.493	11.5167	11.5747	11.7262	10.9859	10.9756	10.4043	10.1497	11.9073	10.8135	10.6221	10.8985	10.0518	9.78573	9.03074	9.57008	10.0532	9.40678	10.0378	9.66448	10.8763	9.93277	9.97855	9.88402
9.92654	9.91079	8.57802	9.71895	10.7443	10.392	10.1312	10.1817	10.5644	9.86242	10.8664	10.3297	10.4305	10.2946	10.8142	10.458	9.98108	9.82513	9.88173	10.0206	10.281	11.0216	10.5404	10.777	10.0603	9.6787	10.0427
10.6962	11.188	11.3734	10.9334	10.3569	10.7646	10.4773	10.3938	10.553	10.5172	11.0594	10.8922	11.0262	10.7427	11.5736	11.2244	10.7399	10.2858	10.8842	11.0647	10.8943	10.4439	10.4861	10.5747	10.6028	10.9742	10.3337
6.79584	7.13381	6.13757	6.87454	8.61474	7.46987	7.29187	8.57464	8.94371	5.20579	8.19788	6.81514	3.37079	8.44435	7.99611	8.33445	8.196	6.42004	6.88639	5.76857	6.40931	7.21848	7.52147	7.3786	7.42173	7.45296	7.86146
9.46766	9.54871	8.95461	9.95557	10.2086	10.0332	9.69811	9.42076	10.0076	9.24109	9.69569	7.07673	6.14406	9.77365	9.66331	10.1204	9.89179	9.1156	9.52296	9.88599	9.24488	9.34063	9.87011	9.01076	8.59569	9.11793	8.3772
10.6639	9.00394	7.94141	9.64876	9.20623	9.78998	10.4939	10.9637	12.4144	9.55504	10.7244	9.2897	11.7707	12.3655	10.2934	12.4588	12.6001	11.8012	10.5973	12.7699	11.0514	10.7305	10.2771	9.97825	11.5738	11.8144	10.578
2.13674	2.13674	2.13674	4.13547	2.13674	3.02835	2.13674	2.71801	2.71801	2.71801	2.71801	2.71801	2.71801	2.71801	2.71801	2.71801	2.71801	3.79089	5.21766	5.41866	5.09537	5.7361	6.11556	4.95204	1.85312	2.05023	1.85114
8.3174	7.31996	8.74597	9.13658	8.14061	8.3174	8.11875	8.05225	8.345	6.03706	7.45225	6.39679	6.61814	6.98903	8.42214	7.3634	7.9703	8.6971	7.22405	8.66893	7.6984	7.27355	7.8081	7.52404	6.80294	6.70456	7.26695
2.05099	2.05099	2.05099	2.05099	2.08651	2.05099	2.05099	3.82466	5.99358	2.38747	4.34678	2.72677	2.72677	5.80862	2.9538	5.82591	6.18119	4.45041	4.45041	4.45041	4.45041	4.2379	4.45041	4.45041	4.82808	5.02807	4.45041
2.05099	2.05099	2.05099	2.05099	2.21391	2.05099	2.05099	2.47698	2.47698	2.01138	2.47698	2.10217	2.4596	2.38488	2.47698	2.47698	2.47698	2.89491	3.04813	3.04813	3.04813	3.01922	3.04813	3.04813	2.4153	2.89491	2.36739
8.83801	8.63454	8.78686	8.47189	9.28441	8.83801	9.12552	10.2178	10.278	10.6113	10.3111	10.5162	10.2519	10.1189	10.601	10.2804	10.2009	8.92707	9.17954	9.33214	8.98605	9.68743	9.23513	9.56834	9.26545	9.36896	9.43681
13.1558	13.0117	13.0706	12.9294	12.37	12.7493	12.646	11.7308	11.7715	12.1239	12.1413	11.84	12.4443	11.9962	11.6406	12.3342	12.1356	12.4824	12.0445	12.3463	12.1804	11.8051	12.0513	12.2464	12.2851	12.2554	12.0884
4.89196	4.7932	4.58316	4.11088	4.58316	4.58316	4.58316	5.25865	5.94862	1.32372	6.43826	3.55847	5.69228	4.85591	3.94128	5.30453	4.87351	3.7004	3.7004	5.25975	4.81114	4.87473	4.85624	3.7004	6.34263	3.7853	4.43441
14.0648	14.2705	14.0144	13.3921	14.8178	14.7343	14.679	14.9151	14.809	15.0038	14.8374	14.8585	14.7617	14.8448	14.9207	14.7739	14.7617	14.4676	14.4232	13.9748	14.1008	14.8711	14.8407	15.0101	15.1533	15.0968	15.2278
6.1119	6.54053	6.81798	6.9599	6.99274	7.20651	7.37016	8.98764	9.33262	8.79113	9.1634	5.72548	3.35785	9.08358	8.76576	9.46005	9.26727	7.63582	7.81908	8.8358	8.49135	9.58643	8.43916	8.71341	6.87382	7.81517	7.46841
12.3093	12.1524	12.4817	12.4568	11.5903	11.8361	11.5968	10.6408	10.8665	8.99769	11.4698	10.2269	10.6452	10.8698	11.2237	11.0819	10.9954	10.9839	10.4274	11.3353	10.8433	10.0048	10.5531	10.4217	10.6852	10.7429	10.6579
8.31563	8.57415	8.12275	8.37741	9.22982	9.23195	9.18116	9.488	10.026	9.93074	10.2353	9.69292	9.48299	9.63348	9.58648	9.55273	9.83892	9.67371	9.64526	9.57932	9.80726	9.56928	10.1277	10.0241	9.99238	10.1301	9.53453
12.016	11.9709	11.9822	11.7705	11.2918	11.4514	11.3634	10.7551	11.0326	11.6595	11.0802	10.967	11.4231	10.9451	11.4269	10.9779	10.985	11.2549	11.026	11.1819	10.7895	10.6596	10.6486	10.8233	11.0627	10.8477	10.3785
12.753	12.6033	12.8514	12.9524	12.3089	12.4847	12.6411	11.7264	11.658	11.794	12.1878	11.8037	12.0917	11.8892	11.8074	11.8118	12.1039	11.7306	11.1373	11.6671	11.5318	10.9217	11.0745	11.1963	11.3784	11.6884	11.311
10.579	10.6854	10.5107	10.4548	10.2106	10.1247	10.0236	9.13245	10.3855	9.34026	10.5213	9.26375	9.4128	10.2325	9.33984	10.3924	10.2249	9.52218	9.63865	10.3009	9.60431	9.88838	9.48006	9.55727	10.1571	9.78055	9.77325
8.26367	8.46472	7.87407	7.44987	8.46733	8.05709	8.02259	8.52897	8.82586	8.81805	9.01911	9.14057	9.05139	8.92655	9.08302	8.29231	8.33304	6.30551	7.93996	6.81563	6.42398	7.42806	7.15365	7.94327	8.75963	8.41806	9.38447
9.62784	9.29899	9.08455	9.30876	9.54664	9.11816	9.72275	9.26983	9.41054	9.95926	9.2312	9.38769	9.88549	9.89267	9.89656	9.68985	9.40682	9.10064	9.26649	9.31654	9.13347	9.84379	9.46658	9.50811	9.72035	9.5388	10.0107
9.54257	8.03408	9.86643	9.43152	11.0083	10.8033	9.73156	12.4291	12.1878	11.4742	12.9078	11.2548	9.64092	11.1231	12.1002	10.8099	10.9122	9.46502	8.8641	9.05543	9.21981	9.45956	10.6514	10.911	10.7478	11.7373	9.69298
12.6186	12.1399	12.3055	12.4557	12.0227	11.5575	11.5957	10.2737	10.9571	9.29855	11.2039	10.7435	11.2918	11.086	10.7665	11.2737	11.111	12.1196	11.4776	12.0818	11.7123	11.2493	11.4348	10.9558	10.9087	10.9087	10.0405
12.7268	12.4883	12.2895	12.4883	12.5942	12.4249	12.4195	11.8015	12.0376	12.6188	12.2766	12.4391	12.4202	12.2785	12.5327	12.5402	12.0572	12.3429	12.1849	12.5297	12.3883	12.2701	12.459	12.1664	12.2536	12.0056	11.747
12.0223	11.738	11.6213	11.9596	11.7916	12.0546	11.7949	10.4394	10.6492	11.3464	10.8477	10.7436	10.9813	10.6055	10.6987	10.9088	11.2883	11.0074	10.6918	10.9021	11.0685	10.1852	11.041	10.8789	10.6554	10.8712	10.7642
9.06107	8.86004	8.63438	8.56167	8.63014	8.3671	8.51345	9.79926	9.94775	9.0523	10.1568	9.97276	10.6338	10.5925	10.3353	10.4606	10.446	10.3163	10.432	10.4488	9.94056	10.3327	9.9155	9.83909	10.2933	10.115	9.9406
12.7288	12.5829	12.7709	12.8388	12.1276	12.4079	12.4427	12.2837	12.2863	11.1014	12.1878	11.7911	12.3132	12.1567	11.6082	12.0306	12.1986	12.2734	11.9907	11.6413	12.0198	11.7605	11.6291	11.9459	11.6502	11.6462	11.8182
7.21033	7.65212	7.76894	7.27364	9.09431	8.77597	8.72452	10.5577	10.6522	11.1886	10.526	11.086	8.61791	10.3346	10.3219	9.44113	9.57605	8.98509	9.03297	8.18666	8.77927	10.84	9.66962	9.94453	10.3814	10.0621	10.2102
9.42839	10.1287	9.3531	9.35273	8.71839	9.60497	8.40314	8.41684	8.23405	8.60809	8.73435	8.60809	8.93374	9.09136	8.7625	8.81003	8.77122	9.22533	9.14711	9.22131	8.95036	8.02296	9.21478	8.74732	9.31324	9.58737	9.4912
11.6585	11.7647	11.6868	11.8647	11.9247	11.8655	12.1626	12.2029	12.0632	12.102	12.114	12.1941	12.375	12.0692	11.3192	11.9821	12.0471	12.2687	12.2279	12.0842	12.3008	12.2318	12.4154	12.5205	12.2242	12.0035	12.3611
12.0723	12.1603	11.0988	12.3209	11.9488	12.4843	11.5858	12.3853	12.9243	13.222	12.8192	12.6649	12.9749	12.1578	12.6349	13.4673	13.529	12.586	12.1748	12.421	12.3964	12.3406	12.2643	12.5242	13.3477	13.0042	12.6957
10.9806	10.7304	10.2677	10.5876	10.9636	11.1311	10.8431	6.27572	7.68725	5.56865	7.25603	4.69025	5.51927	7.73109	7.80677	7.89304	7.75974	7.43471	8.03044	8.13495	7.4172	5.71521	8.39028	8.14027	8.79198	8.94042	8.83146
11.3697	11.2289	11.3563	11.3392	11.2178	11.3375	11.5599	12.6261	12.3483	11.7203	11.944	12.5634	12.9986	12.7425	12.8742	12.461	12.3263	12.212	12.3091	12.3426	12.1897	12.3478	12.3829	12.2328	12.5076	12.4829	12.5426
9.22772	9.00869	8.58719	8.1657	9.8496	8.86009	8.66857	5.21075	5.21075	5.12933	4.9753	4.97632	4.97632	4.89446	5.27378	4.6688	5.07521	5.46913	4.66925	5.0447	4.43329	5.31201	4.87551	5.15992	5.75697	6.24837	5.81103
5.87519	5.87519	5.87519	5.87519	6.03094	5.16587	5.87519	6.677	7.06836	4.5254	6.88521	5.85102	5.43114	6.71183	5.42234	6.67122	6.82438	6.76448	6.7311	7.33202	7.19932	6.71542	6.1286	6.71542	7.33202	7.18581	7.3374
11.234	11.233	11.1781	11.0796	10.2955	10.6396	10.3426	10.3183	10.3697	10.5281	10.6692	10.5185	10.898	10.528	10.4278	10.3127	10.4062	10.6425	10.2726	10.5509	10.3158	9.98285	10.0597	10.0974	10.5451	10.7191	10.417
10.3164	10.4617	10.2817	10.0564	9.64452	9.50502	9.64376	9.53231	9.38118	6.74432	9.96994	9.31738	9.76764	9.63745	8.77068	9.45408	9.7342	9.46	8.81166	9.59438	9.28406	6.99255	8.74808	9.22351	9.61176	9.7943	9.71366
11.8027	11.9509	11.3267	11.5479	12.2427	11.9271	11.8652	9.96958	9.99956	10.084	10.755	10.0661	10.6385	10.4852	10.4193	10.4313	10.3541	10.2862	10.312	10.1586	10.255	9.95941	10.2261	10.544	10.371	10.4273	10.4251
10.2845	10.5349	10.3273	10.4667	11.5286	11.4382	11.2175	11.273	11.3746	11.3042	11.6304	11.4854	11.4363	11.3006	11.1287	11.1395	11.1086	11.0928	11.1253	11.0836	11.2152	11.585	11.5675	11.6966	11.5635	11.5286	11.5041
11.2476	11.2846	11.0922	11.0657	10.6655	10.7695	10.7845	11.6721	11.7885	10.4028	11.6458	11.452	11.9302	11.6992	11.3423	11.8611	11.7462	11.973	11.8494	11.6109	11.6718	11.5587	11.3465	11.4909	11.307	11.598	11.3489
10.9594	11.598	10.6443	11.1722	11.99	11.8299	11.7246	11.672	11.548	11.3139	12.0101	10.6634	7.23911	11.5172	11.4921	11.5432	11.4527	11.0533	11.7938	11.7638	11.7126	11.8065	12.5055	11.7752	11.5472	11.6061	11.7811
9.34352	9.12733	8.56569	9.11559	9.09694	9.09694	9.11236	8.49188	8.96376	8.58551	8.41978	8.80787	9.04256	9.51413	9.91815	8.89301	9.54975	8.42118	8.53716	8.52327	8.31065	7.13316	8.26556	8.6941	8.74883	8.97479	8.89855
3.66486	3.76222	3.53439	3.66486	3.66486	3.79994	3.66486	4.98222	4.33542	3.52038	4.55576	3.25461	3.28728	4.81735	4.63706	4.61702	5.5264	5.24076	4.22357	4.89808	5.31105	3.99456	4.04919	4.22357	3.63896	3.92495	4.3001
7.20396	7.75713	6.88012	7.52932	9.3687	8.40063	8.50806	9.71353	9.65418	10.65	10.1433	8.97653	5.54947	9.82421	9.7369	10.0383	9.9805	8.11028	8.64805	8.03166	8.91929	10.2825	9.61263	9.44585	9.62787	9.41385	9.66836
9.38384	9.64528	9.52907	8.69585	8.08152	8.32845	7.47027	8.56575	9.14347	7.22619	8.83447	8.01319	9.58342	8.99025	8.00533	9.03996	8.891	8.82355	9.02026	9.41381	8.35815	9.04341	8.24067	8.24067	8.68386	8.86446	8.24067
10.6802	10.7903	10.8487	10.4918	9.85038	10.5046	10.555	11.7181	11.568	11.4989	11.5172	11.8492	12.3678	12.1701	11.9418	11.9587	11.8994	11.6334	11.8298	11.6959	11.397	11.4965	11.0558	11.1007	11.9411	12.1207	12.007
11.8835	11.8239	11.5344	11.5833	12.2475	11.8728	11.8978	8.53915	8.44434	7.22197	8.05139	5.74766	6.85202	8.1797	8.5487	8.35279	8.17803	8.06777	8.18222	8.30042	7.61531	6.71122	8.07945	7.9696	8.56919	8.65079	8.53877
12.5349	12.6445	12.5514	12.6613	12.2544	12.4639	12.3776	11.9778	11.8527	12.0064	12.1602	11.9903	12.6735	12.0924	12.1185	11.9837	12.2521	12.0555	12.1692	12.3317	12.011	11.851	11.8281	11.8538	11.8512	11.9815	11.9914
8.83034	8.60266	8.30842	8.6534	8.55971	8.57617	8.03771	8.58535	8.43374	8.21684	8.51536	8.46136	8.82963	7.69862	8.73448	8.37658	8.0513	7.96537	7.96537	7.85361	7.49169	6.42055	7.05028	7.60669	7.96537	7.58345	6.76324
9.57051	9.57051	10.2636	9.95216	8.07621	9.57051	9.27861	11.362	10.9219	11.722	10.6599	11.5606	11.2164	11.2097	11.4302	10.663	10.9563	11.9538	11.7315	11.8496	12.0254	12.1086	11.4617	11.8871	11.1919	11.1048	11.1931
11.4155	11.4626	11.7454	11.7443	10.8187	11.2029	11.2635	10.62	10.7666	10.1687	11.0253	10.8864	11.0298	10.9036	9.86639	10.7333	10.9872	12.1795	11.6244	11.7747	11.6703	10.8886	11.3216	11.1568	11.1029	11.2984	10.9861
12.4622	12.5194	12.6076	12.7126	12.9505	13.0048	13.0018	12.8619	12.8619	12.9565	13.098	13.0034	13.1029	12.9698	12.8619	12.8713	13.0486	13.0425	12.6966	12.8894	13.0663	12.957	12.8997	13.0431	12.9348	13.0351	13.0645
10.082	9.95055	10.858	10.2359	9.67292	10.1882	10.2703	10.9019	11.4937	9.87127	10.6717	10.8504	10.8832	10.8574	10.421	10.7704	10.7404	11.2191	11.0919	11.64	11.362	11.7094	11.2868	11.3814	10.6199	10.8512	10.7
11.1586	11.1649	11.0411	11.0411	10.8748	11.023	11.16	11.8515	11.6963	11.2501	11.4512	11.858	11.8379	11.5968	11.6055	11.4631	11.4306	11.3233	11.3276	11.0342	11.0457	11.6155	11.0147	11.1822	11.6054	11.373	11.3424
9.91415	9.69927	10.0217	10.1013	10.8019	10.951	11.0403	10.0661	10.1478	10.0711	10.1237	10.3057	9.75761	10.124	10.3351	10.0316	9.80914	8.98183	9.47838	9.52944	9.55877	9.37654	9.8823	9.98225	9.96816	9.92218	9.91245
6.71736	7.1986	6.25906	7.10154	8.39796	7.92648	7.95151	6.65408	8.07208	7.41218	7.87221	7.09363	6.41428	7.50703	7.29673	8.01545	7.74273	6.08692	6.24257	6.09006	6.11634	6.96702	5.60681	6.90865	7.68916	7.67417	7.40443
10.5401	10.218	11.0666	10.9765	9.90918	10.5411	10.5711	10.2385	10.2235	8.44847	10.3408	9.85076	10.3845	9.8119	9.28862	10.0011	10.2671	11.0767	10.3095	10.6331	10.6422	9.986	10.2879	10.0674	9.36833	9.72445	9.44948
11.7726	11.6728	12.2343	11.9799	11.3536	11.5852	11.5027	12.2146	12.3975	12.3251	12.4822	12.1773	12.8087	12.1958	11.7805	12.4689	12.9902	12.237	12.7871	12.4801	12.9134	12.4216	12.4653	12.6159	12.1265	12.2487	12.4278
10.9103	10.5999	11.0013	11.0108	11.0108	11.1791	11.0652	10.5037	10.6907	10.4093	10.9375	10.9615	11.2774	11.2076	10.7153	11.0041	10.8756	11.449	11.6609	10.5888	11.3407	11.1469	11.4226	11.4144	11.2094	10.3287	11.4095
12.4993	12.6634	12.5372	12.4715	11.9122	12.4223	12.148	10.5097	10.3044	10.4153	10.7149	10.9743	11.6597	10.7057	11.1296	11.0723	11.3381	11.015	11.4036	11.2186	11.1918	11.4578	11.156	11.1866	11.1871	11.3068	11.1383
11.7206	11.3961	11.3075	11.4919	11.458	11.7178	11.6228	11.2199	11.0423	11.5495	11.1498	11.464	11.5769	11.547	11.8321	11.6377	11.7764	11.4666	11.4918	11.4259	11.2982	11.5562	11.4108	11.2315	11.7113	11.6092	11.6726
9.77946	9.58673	9.20551	9.00805	9.55077	9.24277	9.23408	6.67267	7.73731	4.96171	7.48653	5.77471	7.84801	7.26068	6.50361	7.59487	7.77079	7.16328	7.51508	7.7092	6.51815	6.88961	6.95071	6.56078	8.80734	7.93135	7.53731
4.32928	4.57429	4.13579	4.85152	5.7934	5.31936	5.51899	8.53276	8.72221	9.33217	7.90753	6.47521	5.30403	8.61467	8.47245	7.85955	7.91323	6.41527	6.37249	7.09369	6.60427	8.79994	7.41601	7.48376	7.66116	7.53583	7.04686
11.2711	11.0445	11.6158	11.2043	10.4041	10.6592	10.6066	12.3636	11.9164	11.899	11.8825	12.3128	12.3555	12.5781	12.252	11.9788	12.1203	11.746	11.8015	11.7506	11.8343	11.6156	11.6811	11.6794	11.9104	12.0671	11.8141
8.62227	7.96995	8.05759	8.29495	7.54232	7.57004	8.08811	10.1591	9.73234	6.84153	9.52492	9.43943	7.36405	10.6399	10.0574	9.99898	10.2657	9.99087	8.58016	9.89267	9.77404	7.98266	8.88592	8.56662	9.44288	9.76094	9.66157
10.9653	11.1947	11.9694	12.2211	12.3398	12.4652	11.835	12.7587	12.8937	13.3207	13.1801	12.9992	12.9252	12.7997	13.5138	13.4163	13.6909	12.3321	12.7645	12.1592	12.7072	12.5925	12.4648	12.4097	11.741	12.2637	12.0925
9.46822	9.90289	9.90043	9.89781	11.0547	10.6516	10.5534	12.4191	12.6593	12.6515	12.1953	12.5037	9.31319	12.2382	12.4667	11.9261	11.9371	10.562	11.0633	10.9039	10.7541	11.7761	10.9266	11.2652	11.3675	11.0498	10.8063
5.83103	5.56921	5.58444	5.58444	5.6873	5.58444	5.17861	5.12199	5.57296	5.12114	5.81821	5.57296	5.57296	4.67789	5.57296	5.57296	5.57296	6.85963	4.95167	6.21843	6.35522	6.15357	5.7591	5.29415	5.25419	5.92669	4.94123
3.72984	3.72984	3.72984	3.72984	3.15435	3.76895	3.70059	5.27946	5.95893	4.41879	6.35221	5.78442	5.34715	5.05128	6.38278	5.50575	6.54444	6.61728	6.23044	6.23044	7.10788	6.23044	6.23044	5.93796	5.01837	6.23044	5.01837
7.60294	7.60889	9.14347	8.67537	5.18576	7.60294	6.99284	8.45685	9.28597	4.51326	9.33465	9.11049	7.76451	6.46863	9.1049	8.43749	9.02473	9.99336	8.20085	10.2917	9.92535	5.83115	8.16005	8.18399	7.74447	9.13675	6.6095
10.3058	10.3274	10.2211	10.1229	9.95414	9.72762	9.99164	9.83569	9.70612	9.96973	9.54168	10.0637	10.5529	9.9507	9.60475	9.59399	10.348	10.2474	10.1725	9.50391	10.5109	10.289	9.62962	9.95133	9.49061	9.76027	9.85845
11.3817	11.5265	11.2293	11.0588	11.3664	11.3294	11.6113	11.2953	11.3181	11.0281	11.5663	11.4066	11.8773	11.3952	11.1451	11.3918	11.4066	11.7018	11.7134	10.9644	11.6095	11.6397	11.1436	11.7965	11.7925	11.6166	11.7341
8.21688	8.66144	8	8.07413	10.3928	9.64082	9.92429	11.2515	11.3953	12.581	11.2806	11.7904	10.5125	11.3147	11.415	11.0369	10.5277	10.2226	10.1969	9.57302	10.0437	11.8124	10.7128	11.1213	11.005	10.959	11.0842
10.2712	10.8055	10.9054	10.9408	11.514	11.2757	11.4254	11.6323	11.5011	10.5418	11.2408	11.8225	11.4567	11.3549	11.03	11.0632	11.1101	10.96	11.2688	11.1556	11.5948	11.684	11.684	11.8311	11.2114	11.4888	11.5874
8.50823	8.44511	7.90712	7.78664	9.73045	9.09529	8.91965	8.97154	9.24055	8.56704	8.60402	8.72882	8.14212	9.11532	8.56704	8.56704	8.91677	8.5794	8.5794	7.21252	8.34207	9.40755	8.89022	8.88784	9.06051	9.02555	9.00444
8.48242	8.46902	8.25932	8.29677	7.5506	7.9349	7.65588	9.26045	9.34262	7.69653	9.95899	8.86299	10.8062	9.13768	9.40985	10.0625	9.50828	9.45045	9.98414	8.94793	8.44044	5.44761	8.00245	8.33489	8.35717	9.22753	9.10714
10.4319	10.4252	10.715	10.1419	8.79839	10.1518	9.02003	11.2557	11.1054	11.4045	10.9789	11.1826	12.1048	10.7595	11.2158	11.7195	11.0864	11.2985	11.0453	10.5028	9.84805	9.51366	10.3092	10.3133	10.4462	11.0994	10.5299
7.98745	8.56458	9.24304	8.96425	8.88086	9.13834	9.63161	9.49259	9.38885	8.19383	9.17616	9.83672	8.03313	9.19463	8.00832	8.95717	8.5194	9.56573	8.48214	9.12413	9.22387	9.08063	9.34651	9.4592	9.42649	9.1449	9.14568
13.9215	14.1149	14.2295	14.1492	14.1338	14.139	14.2491	13.2482	13.4948	13.0154	13.1168	13.6241	12.3598	13.0832	13.2643	12.8466	12.6737	13.0691	13.347	12.9329	13.2115	13.246	13.114	13.2813	13.2997	13.2393	13.1195
5.06717	5.06485	6.43159	4.87009	4.88289	5.04839	6.43155	10.3967	10.3782	4.88453	8.93696	9.9236	9.38623	9.54138	8.19546	8.67315	8.58676	9.34175	8.33212	8.27681	8.98311	8.43037	6.71415	8.78287	8.27175	9.46164	8.69399
12.0522	11.9251	13.0306	11.8847	11.2573	12.0246	12.4242	13.1909	13.1263	12.4828	12.105	13.7024	12.7024	12.7626	12.2148	12.2948	12.2828	12.3068	11.9818	11.8603	12.105	12.3261	11.731	12.2333	12.2158	12.4775	12.0183
9.85987	9.81489	9.10436	8.27842	8.27842	9.33972	8.27842	9.59099	8.04446	7.77799	9.05953	8.95284	7.95965	8.58826	9.1435	8.8502	9.36401	10.0323	9.0595	9.29731	9.54652	7.94208	9.26146	8.58773	10.0228	9.28935	9.19199
7.90336	7.64732	6.39487	3.76001	3.79094	7.0603	4.58746	10.6665	5.02481	2.4877	8.99574	6.47782	2.4877	8.68144	9.22034	9.12292	9.91358	11.4636	7.34895	8.86747	6.68178	3.86924	8.97026	5.24803	10.6922	8.59009	8.66401
10.8591	11.0192	10.2935	9.86692	10.2168	10.3307	9.6609	7.86326	8.36464	8.75253	9.25561	8.52834	9.21125	8.85765	8.8743	8.71057	8.81308	7.74854	8.01098	6.12756	6.65387	6.01347	6.23722	7.13981	8.73379	8.78347	8.5521
12.469	12.5668	12.1937	12.3275	12.9185	12.5935	12.4253	11.2531	11.4722	11.8495	11.7896	11.3262	11.4254	11.5741	10.8066	11.895	11.8763	10.8614	10.8299	10.0643	10.7782	11.2768	10.473	11.0946	11.547	11.831	11.7099
10.8026	10.9262	11.2737	11.2549	11.0268	11.5745	11.2753	10.0322	10.5842	10.1528	10.4105	10.4987	9.76591	10.0522	9.87503	10.3722	10.39	10.0248	10.001	10.4492	10.0299	9.59683	10.2555	10.0598	9.80163	10.1408	9.56733
7.70736	6.68623	9.05209	8.47086	8.33646	8.7281	9.11653	9.7307	9.49103	8.02195	8.40548	9.7755	8.56793	9.49319	8.40548	8.40548	8.34035	8.97407	7.87756	9.06193	8.79619	9.64522	9.14725	8.57619	7.75087	8.32913	8.62332
9.40888	8.80008	10.996	9.46961	7.85812	8.6066	8.99604	12.0813	11.7503	12.006	10.8656	12.3234	11.2994	11.9243	10.649	11.0804	11.1119	11.6619	10.9275	11.5707	11.5109	11.1485	11.1674	11.0055	9.72097	11.3046	10.6751
9.4637	9.23748	9.70655	9.4637	9.62819	9.09339	9.52397	8.93264	8.37967	8.55014	8.28464	8.92893	9.31897	9.00336	9.60559	8.54964	9.13334	8.32529	8.63028	9.34232	8.9897	9.04317	8.96307	9.23585	7.83715	8.69591	8.88366
3.04736	2.96559	3.46296	3.29154	3.29154	3.29154	3.35574	6.91791	7.14236	1.1889	7.2169	2.63908	1.66167	6.73652	3.26338	6.3886	6.82494	7.79989	6.34697	5.35912	8.30626	5.2897	5.28211	5.26731	5.07961	5.61091	5.65699
13.7423	13.6566	13.9912	13.9362	13.5715	13.7367	13.7473	13.3411	13.1207	12.0523	13.3008	13.2218	13.2904	13.3439	12.5307	12.8106	13.0852	13.3059	13.1099	11.843	13.297	12.3	12.8446	12.8055	13.1031	13.2205	13.3274
11.4002	11.8659	11.5229	11.2263	10.9638	11.0874	11.1785	11.9421	12.0954	11.0342	12.279	11.9054	12.2427	11.8785	11.4582	12.1375	11.9245	12.3805	11.9013	11.8901	11.8319	11.2317	11.7586	11.6218	11.9745	11.6022	11.6634
10.0261	9.84623	9.93818	9.53059	8.20126	9.05661	9.13307	9.24982	10.0407	8.23427	10.2609	9.40841	10.4819	9.93591	9.82503	10.221	10.2547	10.2307	9.24239	10.5001	9.72754	7.66007	8.83955	8.79529	9.90439	10.1883	9.70433
12.7994	12.7579	13.1684	12.6988	12.9695	13.1278	13.2351	13.3444	13.3878	13.5934	13.1449	13.9642	13.4396	13.3182	13.4692	13.0285	12.9061	12.9656	13.0258	12.6713	12.7536	13.1405	12.9346	13.2702	13.1591	13.216	13.0612
10.1754	9.92298	10.3426	10.2591	11.8632	11.6289	11.8592	11.7773	11.7373	12.5304	11.6125	12.0634	10.8465	11.3936	11.6285	10.942	11.1371	10.3749	10.581	10.208	10.7266	11.5031	11.2008	11.3662	11.4008	11.4122	11.4203
13.5501	13.6332	12.8956	13.2808	13.8212	13.7349	13.5667	12.4528	12.3539	12.3155	12.6267	12.1556	11.4728	12.687	12.2863	12.7645	12.8163	12.3789	12.5243	11.5834	12.3774	12.6618	12.6335	12.7068	12.9194	13.0227	13.0854
11.6584	12.741	11.5842	12.541	13.1377	13.1566	13.2818	11.8744	12.5169	12.5361	12.7446	12.1232	12.8505	12.7044	12.5587	12.7299	12.6977	12.5066	12.9191	13.2783	12.236	12.0938	13.257	12.5603	12.507	11.3802	11.8822
10.1625	10.3591	10.3012	10.2907	10.1294	10.4566	9.99287	9.58279	9.60171	8.16199	8.80433	9.77269	10.0528	9.59325	9.66653	9.35235	9.34501	10.3968	10.5692	10.599	10.6416	9.8783	10.3911	10.4325	10.2981	10.0861	10.3379
11.9568	11.8017	12.1984	12.0765	11.6645	12.1991	12.0849	11.1045	11.3092	10.6612	10.3339	11.5839	11.7472	11.3736	11.6212	11.0331	10.9592	11.6929	11.3838	11.4923	11.2765	11.1712	11.4421	11.4968	11.0274	11.3518	11.0939
10.2877	10.2165	9.96652	10.163	10.3089	10.2787	9.88963	9.22903	9.82216	9.75904	10.5707	9.41371	10.4765	8.61823	9.82216	9.81645	9.33561	10.6816	10.1257	10.1627	10.1497	10.5406	9.90457	9.34063	9.39797	9.31627	9.52516
14.2651	14.041	13.9651	14.1724	13.8661	14.041	13.8597	13.5804	13.6269	13.3774	13.7325	13.4953	13.813	13.8403	13.7946	14.014	14.1913	13.6729	13.3703	13.4511	13.3328	12.5744	13.366	13.357	13.8573	13.81	13.7189
10.259	10.6848	10.2946	10.5072	10.2848	10.3911	10.1912	9.89352	9.9847	9.89377	10.1995	10.1605	10.3999	9.8416	9.64974	9.96189	9.76798	10.3926	10.3175	9.92256	10.4113	9.80453	10.1433	10.2	10.3489	10.3299	10.3864
11.4239	11.217	11.4886	10.8214	9.75485	11.3779	10.5676	10.3712	10.0688	10.9507	9.86376	8.09775	8.09524	10.4971	10.052	10.2917	9.85885	10.6736	9.97662	10.5107	10.1867	8.10115	10.7288	9.97015	10.8176	10.947	10.4206
11.2539	11.0721	11.4352	11.3366	11.2029	11.0641	11.4013	10.6825	10.6466	10.4288	10.1516	10.7944	10.8013	10.6382	10.3491	10.3267	10.58	11.2303	11.3614	11.2274	11.8022	11.6208	11.3767	11.6076	10.5595	10.4572	11.125
10.0658	9.8582	9.82	9.8834	11.0733	10.7455	10.9397	10.4831	10.6828	11.1289	10.6974	11.0243	10.487	10.9029	10.7589	10.6014	10.5929	10.3422	10.3836	10.3565	10.6163	10.7693	11.1169	11.1451	10.6482	10.8519	11.0095
11.3333	11.2991	10.3495	10.6588	9.94036	9.9659	10.3426	11.6467	11.865	10.2424	11.8018	11.4979	12.7273	12.1286	10.7245	12.4985	12.0575	12.1394	11.6038	11.299	11.358	10.9708	10.9316	11.101	11.521	11.6413	12.0628
10.5641	9.94966	10.4168	9.91851	9.59022	10.3376	9.52614	10.1916	11.0874	9.7849	10.7071	9.73037	10.5449	9.92868	10.8409	11.2136	10.9426	10.0134	9.4516	9.86507	9.74191	8.62751	8.47794	10.251	10.4495	10.3822	9.23551
12.7807	12.301	12.8012	12.3576	11.8052	12.33	12.1167	9.53357	10.3627	8.92224	9.62689	8.02591	8.14265	8.89231	10.0531	10.6377	10.0977	9.41703	8.07961	9.84078	8.91753	6.35277	7.51763	9.79068	10.3501	10.101	8.96338
9.15138	8.28076	8.28076	8.41469	7.98579	8.28076	7.08987	9.18652	10.2162	5.41893	8.86334	6.28586	7.83199	7.51283	7.33279	9.77694	9.38721	8.56265	6.96876	7.60089	5.7835	6.35409	5.49104	6.61445	7.46708	7.52221	5.01885
13.157	12.4886	12.7183	12.7183	12.7004	12.8678	12.3793	12.6824	13.0946	12.7035	13.2219	12.7333	13.0585	12.7188	13.496	13.4201	13.1785	12.155	11.3857	11.8338	11.7134	11.5822	11.2827	12.7307	12.8319	12.983	12.4881
7.83689	8.32139	7.46738	7.91317	6.7554	7.16399	6.97239	7.49813	9.89702	4.72165	9.95147	8.16618	10.1778	9.06871	9.11226	9.64526	10.0846	10.2438	8.29124	10.7246	9.27413	5.52836	8.70965	7.79251	9.15249	9.76001	7.99803
11.167	11.1222	10.3884	10.8609	10.1181	10.5396	10.1096	10.8723	11.2838	9.85759	11.3023	10.7868	11.8173	11.1947	11.4178	11.3506	11.5269	11.6832	11.2345	11.7064	11.2372	10.7381	11.1744	10.8039	10.9166	11.2065	10.9819
12.1985	12.2147	11.9839	12.1406	11.4468	11.8098	11.38	12.0861	12.326	12.6873	12.2733	12.2362	12.805	12.3055	12.774	12.5111	12.4735	12.4022	12.3369	12.7276	12.1858	12.1799	12.2687	12.0417	12.3852	12.4292	11.9138
14.2541	14.3142	14.0318	13.7622	14.5288	14.4985	14.4598	14.4764	14.46	14.1826	14.6255	14.4668	14.4752	14.6585	14.5338	14.4225	14.4859	14.1387	14.4024	13.6332	14.06	14.4954	14.2705	14.5128	14.6898	14.6605	14.7466
9.67084	9.76281	9.11519	9.20728	10.6602	9.77346	10.2013	10.5336	10.5506	9.39123	10.7122	10.7587	9.587	10.374	10.4659	10.0809	9.88508	9.7792	9.47932	8.4737	9.47556	9.85015	9.5136	10.1427	10.1109	10.1109	10.1122
7.1109	7.33862	6.74235	6.8369	7.00539	6.99662	7.00539	7.79268	8.56569	6.33556	8.80851	6.74351	6.66377	7.15426	7.28332	8.34894	8.06324	8.16502	7.1601	8.53474	8.5004	7.70171	7.55433	7.50311	7.91563	7.72405	8.08365
8.28681	8.87088	8.30552	9.00261	9.64268	9.29591	9.65454	8.93015	9.14289	8.64446	9.16095	9.30024	9.49225	8.70084	9.07488	8.99259	8.78145	9.30266	9.42495	9.24385	9.83028	10.0695	9.96428	9.7027	9.19834	9.07399	9.12276
8.91457	8.36933	8.08578	8.92191	9.2044	8.98215	9.12928	8.22562	8.5183	8.72236	8.72515	8.36343	7.23735	7.97341	8.67199	8.70128	8.56538	7.85111	7.45238	7.5847	8.15783	8.09277	8.4439	8.12861	7.51819	8.02298	7.62653
6.30081	5.93795	5.3173	6.30081	6.9031	6.30081	6.67831	3.91414	4.1849	2.91508	4.10155	2.10867	3.78651	3.91414	3.91414	4.88871	4.1422	3.6915	3.83359	4.26709	4.50578	3.37078	4.35382	4.31629	3.68397	4.12301	3.621
13.4392	13.0391	12.9283	13.0075	12.8517	12.79	12.7769	13.6891	13.8804	12.9552	13.8338	13.5256	13.9157	13.811	13.1914	13.8458	13.9921	13.8142	13.7143	13.1301	13.3647	13.2748	12.7744	13.405	13.857	13.8004	13.841
12.3788	12.472	11.2757	11.8831	12.1283	11.3678	11.874	11.7089	11.9079	9.53005	12.1134	11.3542	12.3911	11.9365	10.7508	11.8942	12.0648	11.9714	12.0719	10.4792	11.3487	11.4554	10.7861	11.0756	11.6862	11.6928	11.8444
11.4749	10.2011	10.7501	11.03	11.7457	11.5907	10.8308	12.4084	13.0971	12.4206	13.3229	12.6113	13.364	12.735	13.0435	13.0586	12.4806	12.4523	12.2733	12.6476	12.0624	12.12	12.6256	11.9912	12.0864	12.4298	12.2089
11.5958	10.7444	11.5194	10.7964	9.887	10.7964	9.4608	12.6239	13.3684	13.2099	13.4239	13.0138	13.2246	13.3833	13.7468	13.6713	13.1347	13.4806	12.8651	13.1725	12.5623	12.508	12.583	12.4713	12.7818	13.1401	12.3184
8.53928	8.51158	7.50098	8.29789	9.68146	8.53904	8.33471	9.6194	9.30205	7.73395	10.302	9.40041	9.32887	10.1184	9.94193	10.0793	10.2154	8.79801	9.44123	9.10492	9.58615	9.93882	9.41431	9.57581	10.181	10.0538	10.4287
11.1069	10.9174	10.6592	10.6971	9.6137	9.96186	9.72637	10.9905	11.0379	9.19159	11.1588	10.6682	11.7876	10.6835	9.95269	10.9082	10.5386	11.0485	10.4764	10.892	10.9084	9.06408	9.66858	10.1614	10.3632	10.5526	10.684
12.5115	12.4603	12.2802	12.3369	12.0468	12.1277	12.0846	11.9232	11.7224	12.1986	12.0135	11.8739	12.2336	11.961	12.0334	12.057	11.9627	11.9519	11.7667	12.1202	12.0315	11.8317	11.9303	12.0687	12.1474	12.1549	12.1118
7.06012	7.89615	7.13464	7.49831	7.97333	8.00948	8.31383	6.45273	6.45676	5.8142	6.15008	4.97739	5.03935	6.15008	6.15008	5.93626	6.15008	6.48874	5.28092	7.08801	7.41268	5.7388	7.35871	7.01227	7.36858	7.55518	7.08316
7.32944	8.038	7.3966	7.8125	8.185	8.0325	8.47811	9.21253	9.43298	10.3687	9.67932	9.17876	7.2514	8.701	9.07487	8.98944	9.13588	8.03173	8.69233	8.46547	8.90525	9.69562	9.00625	8.9862	8.98302	8.74715	8.67689
2.12766	2.12766	2.12766	2.31193	2.12766	2.1348	2.176	4.1104	5.0211	1.9422	4.88204	1.9422	1.9422	4.85937	2.97993	4.9597	5.45772	4.81136	4.81136	5.93557	5.1603	4.81136	4.16761	4.51041	4.81136	5.16017	4.17931
9.8256	10.0171	10.1071	10.9049	9.85393	9.29222	9.64824	10.677	11.0097	9.72938	10.8191	10.6629	11.556	11.0559	10.3826	10.9035	10.939	11.3591	10.5266	11.8477	11.3792	10.7499	10.7	10.4949	11.2499	11.1197	10.5562
12.1899	12.1325	12.2895	12.3012	12.4013	12.3686	12.521	6.68716	6.93139	8.10372	6.93499	6.03514	7.31703	9.09909	8.6711	9.33582	9.26007	9.73473	9.68072	9.21138	9.73473	8.59552	10.0498	9.71688	8.67348	8.81998	9.04456
13.0328	12.7797	13.156	13.2478	12.7553	13.0725	12.9023	11.7424	12.1212	11.9273	12.3331	11.5722	12.2726	12.125	11.6692	12.1778	12.3075	12.2593	12.4147	12.4677	12.1441	12.498	12.1594	12.2154	11.5987	12.1558	12.0064
10.7644	11.1542	10.5401	10.7303	11.814	11.2606	11.1171	8.90176	8.89542	9.85125	9.5504	9.14291	9.35113	9.40017	9.95813	9.40025	9.4298	8.85126	8.93881	8.8752	9.05672	9.99607	9.29798	9.6664	9.51094	9.21684	9.61507
10.5982	10.5827	10.3505	10.6526	10.2138	9.80361	10.2027	10.7045	10.7389	10.5538	10.2904	10.7179	11.3623	10.8923	10.84	10.8991	10.8101	10.8325	10.505	11.0495	10.6806	10.9547	10.1535	10.1951	10.3105	10.2561	10.3951
11.6267	11.7452	11.7723	11.7805	11.2461	11.5155	11.4452	11.2481	11.1428	10.6966	11.0516	11.4904	11.4122	11.2004	11.2677	10.7559	11.1067	11.2909	11.1379	11.1338	11.4414	11.2923	11.1197	11.5473	10.6914	11.1043	11.0463
12.339	11.9793	11.9622	12.2164	11.8261	11.9834	12.0049	11.3873	11.8056	11.0656	12.0329	11.4808	12.1894	11.7982	11.1897	11.8412	12.0947	11.8914	11.5331	11.9627	11.7299	11.2942	11.5737	11.6419	11.6479	11.7753	11.4443
10.0305	10.0164	10.0224	9.8154	9.29081	9.65356	9.34562	11.6433	12.0285	11.8027	12.146	11.9317	12.4387	11.955	12.0013	12.186	12.0312	11.8125	11.6057	11.6437	11.535	11.4415	11.6487	11.3499	11.8267	11.7632	11.9508
11.6977	11.5845	11.6846	11.6846	11.6547	11.7127	11.6517	10.3915	10.669	10.6152	11.0568	11.0011	10.8007	10.8891	11.1358	11.0043	11.0713	10.7281	10.7251	11.0005	10.7473	10.9418	10.726	10.6265	11.2635	11.2347	10.6537
9.65154	9.50242	8.77962	9.07829	8.75527	8.81657	9.0796	9.68789	9.88653	8.40908	10.2239	9.31043	10.7063	10.0192	8.35691	10.0559	10.3431	11.3104	10.8095	9.94105	10.8195	10.3586	10.4428	10.3796	9.9857	9.07813	9.98168
12.0928	12.2234	11.919	11.818	11.5463	11.5349	11.3565	11.7082	11.5775	11.809	11.648	11.5664	11.969	11.6029	10.871	11.697	11.7965	11.975	11.6649	11.5617	11.7668	11.6126	11.7125	11.6362	11.899	11.8115	11.8971
8.66306	8.62782	8.41068	7.96634	6.94984	7.64081	6.74966	8.30482	8.26226	8.43743	8.40231	7.60283	8.70223	7.79726	7.39797	7.95209	9.34185	9.04168	8.43132	8.95974	8.88434	7.33062	8.17492	7.15346	7.68241	8.10582	7.97318
6.34153	6.22079	6.5604	6.13769	6.95233	6.09286	5.70803	6.4683	5.85966	5.49624	5.04481	5.04481	4.77977	5.45086	5.49624	5.40317	5.61107	4.77687	4.74496	5.06951	5.27348	5.14857	5.22857	5.34491	5.25649	5.18675	5.90974
8.7132	8.66721	8.0044	8.01563	9.68908	9.31807	8.91531	9.42936	8.94821	6.90936	9.2639	9.11089	7.6584	9.07484	9.27266	8.89586	8.93127	8.69487	9.04001	7.81994	8.64305	8.88617	9.12471	9.45793	9.6152	9.3857	10.0381
8.00119	8.17489	7.95237	8.00119	8.07414	7.94423	7.95112	9.35958	9.35958	9.32436	9.52886	9.40663	9.14206	9.66088	9.90844	9.63597	9.5752	9.35994	9.20807	9.53651	9.53651	9.4022	9.43786	9.34067	9.53651	9.53651	9.4147
12.2782	12.4889	12.3944	12.9075	12.8674	13.2283	12.5918	11.0157	11.3664	12.19	11.603	11.3029	11.8918	11.0705	11.6376	12.081	12.1815	10.666	12.1086	11.4016	11.0956	11.5329	11.3974	11.6347	11.6265	11.5888	11.2261
8.17734	9.09543	8.24261	8.63745	9.60773	9.38495	9.79726	9.5925	9.84946	10.2145	10.3573	10.2071	9.20162	9.26623	9.69356	10.1603	10.032	8.98903	9.43793	9.16948	9.70305	9.59831	9.67462	9.99745	9.35935	9.79476	9.32858
2.05099	2.05099	2.05099	2.05099	2.08967	2.05099	2.05099	2.06111	2.06111	2.06111	2.06111	2.06111	2.06111	2.06111	2.06111	2.06111	2.06111	2.14291	2.14291	2.14291	2.14291	2.14291	2.14291	2.14291	2.14291	2.14291	2.14291
7.1446	6.86502	6.40098	6.65135	8.2319	7.43377	7.63934	9.4275	9.40994	6.44159	9.0389	8.65644	6.40589	9.47152	9.16634	9.78477	9.55775	7.40766	7.12654	6.22057	7.5382	8.04499	8.3028	8.76471	9.09118	8.72038	9.59914
8.73669	9.3078	8.3857	8.78088	9.53175	8.87574	9.01225	10.3438	10.1914	10.1855	10.2597	9.89589	9.47196	10.4875	10.5781	10.4447	10.4295	8.92587	9.33546	8.63994	9.77286	10.5593	9.24617	9.93861	10.2765	9.74726	10.4677
10.8522	10.6172	9.91363	10.3906	10.5323	10.2916	10.1432	9.87766	9.81817	10.7015	10.6797	10.2013	10.2933	10.4536	10.0516	10.1433	10.3152	10.5377	10.163	9.72014	10.3759	10.1706	10.1297	10.0379	10.4721	10.4893	10.7004
11.2002	11.1854	9.93606	10.7563	11.1875	10.5573	10.6315	9.96856	10.0977	10.6396	11.086	10.2551	10.418	10.4837	9.51595	10.3547	10.2056	10.4062	10.197	9.61868	10.2352	10.0581	10.0569	10.0562	10.2087	10.21	10.7445
8.04022	7.75572	6.95243	7.87617	9.40324	7.96628	8.30266	8.55891	8.59867	8.06108	9.15931	8.02061	8.14679	8.59867	7.90673	8.4471	9.06568	9.35775	8.79788	8.41161	9.27602	10.61	9.76697	9.30001	8.84475	8.89448	9.07379
12.0096	11.5903	13.1004	12.3091	11.168	11.8702	12.2357	12.1317	12.142	11.4391	10.8325	13.2061	11.5772	12.0154	11.1242	11.274	10.9141	11.8052	11.1075	11.9297	11.6147	11.1339	11.1055	11.0615	10.9009	11.259	10.7732
10.6379	10.4394	9.71656	9.95369	12.0368	11.4217	11.3247	12.2164	12.1493	12.0306	12.1489	10.9668	6.92499	11.9057	12.2728	12.0327	12.0867	10.421	10.944	9.76412	10.6463	10.9379	11.239	11.5391	11.8887	12.1429	12.2591
10.8623	10.817	11.5122	10.8796	9.28119	10.5643	10.5574	9.80657	9.98581	8.03516	10.0595	10.3199	7.95244	9.39817	9.47277	7.78436	8.91426	10.6458	10.8247	9.77094	10.232	11.0725	9.69667	10.1993	8.84241	8.40218	8.78518
8.78021	8.50618	8.04851	7.97179	8.00807	7.95976	8.03109	8.77822	8.78037	7.81892	9.44796	8.18524	8.38735	8.89395	7.63185	9.11003	9.55611	11.0703	10.9486	10.081	10.6022	9.97355	10.005	10.2078	8.61213	9.20144	9.25027
8.51163	8.61954	8.41995	8.59074	9.07457	8.93107	8.97277	8.41094	8.57246	6.02358	8.85775	9.02722	8.32415	8.68464	8.12911	8.61099	8.76626	9.55658	9.53073	7.63025	9.55715	9.00583	9.25322	9.78976	9.36739	9.22961	9.95273
11.2923	11.2119	11.48	11.6025	11.9695	11.9677	12.1876	10.5264	10.449	10.9947	10.6126	10.903	11.1675	10.6022	10.1125	10.3629	10.4212	10.9173	10.9136	10.2175	10.9906	10.9503	11.1167	11.3024	11.0703	10.7848	10.8343
12.9456	12.836	13.6216	13.0859	12.6687	12.9442	13.2478	13.3526	13.4566	12.8985	12.6473	13.5744	12.9775	13.252	12.08	12.6119	12.5662	13.1182	12.7757	12.6484	13.0477	13.0579	12.7792	12.7855	12.5901	12.554	12.5877
11.8113	11.523	13.1811	12.9061	12.6481	12.7999	13.487	13.7562	13.6857	13.0263	12.6334	13.9538	12.9284	13.4693	11.86	12.5098	12.4867	13.5846	13.7011	12.5953	14.0769	14.1602	13.8981	13.6502	12.103	12.6732	12.3346
8.58984	8.41112	8.81568	8.92925	7.8486	8.26131	8.52325	10.5673	11.0024	10.1999	10.2939	11.1794	11.1963	10.5467	10.3397	10.4789	10.2331	11.1197	10.3526	10.8912	11.1283	11.135	10.5792	10.8305	10.6837	10.5126	10.0737
2.07	2.07	2.07	2.07	2.07405	2.07	2.07	3.78962	3.78962	3.27832	4.44614	3.40552	1.61076	3.78962	3.78962	4.15186	5.08009	3.90685	3.83587	3.84517	4.12889	3.85522	3.88379	4.05679	3.88052	3.57279	4.38071
8.46862	8.29336	8.80513	8.80971	7.97943	8.36599	7.97579	10.8265	10.5938	11.4422	10.7051	10.7567	9.98433	10.7607	10.9908	10.8605	11.4955	10.5965	9.68575	11.1358	11.2378	11.7114	11.1009	10.7025	10.1465	9.19303	10.6217
8.28818	8.47443	8.53327	8.47443	8.73352	8.47443	8.05448	5.00523	4.61376	5.26988	5.00523	5.05582	5.05582	5.00523	5.05582	5.14036	5.05582	5.28312	4.66395	5.19061	5.38717	5.14197	5.89976	5.41417	5.09526	5.41841	5.30685
4.99034	4.6014	4.6014	5.37879	5.61218	5.78202	4.99034	6.20655	7.17221	5.23885	6.97384	5.89328	5.11113	6.96074	6.20655	6.65133	7.58882	5.8378	5.90571	5.77951	6.33342	7.3549	6.81571	6.579	6.39577	5.92249	6.17438
10.6319	10.8218	11.061	11.2336	11.0623	10.8393	11.0935	8.95884	8.87529	8.66733	9.42011	9.30862	9.29569	9.4674	8.89042	8.98168	9.17515	9.63863	9.58983	8.58098	9.5608	9.85304	9.37054	9.55279	8.98604	8.94092	9.36864
6.03612	6.29307	6.29307	6.36579	5.9844	6.29307	6.14273	5.6544	5.79282	5.54825	5.74194	5.2102	4.34413	5.38639	3.43966	5.50525	5.79282	5.66323	4.56229	4.5536	6.69207	6.58567	6.36386	6.02115	5.55514	4.98633	5.86686
10.1669	10.2677	10.5934	10.5939	10.8721	10.8169	10.8208	11.4125	11.1253	10.9909	11.4332	11.5414	11.2334	11.4966	11.4494	11.1487	11.1327	11.044	11.4281	11.1434	11.4252	11.6801	11.7962	11.6893	11.2246	11.212	10.9773
12.9846	13.0231	12.9931	12.8452	12.3525	12.7834	12.667	13.5419	13.4244	13.2502	13.5504	13.284	14.1679	13.3894	13.6436	13.6292	13.6954	13.7442	13.6657	13.667	13.6869	13.358	13.4278	13.2868	13.5385	13.5993	13.2175
7.26	7.26	7.61798	7.26827	7.15153	7.32506	7.08739	8.11582	8.7727	4.44869	8.88368	6.42386	6.74945	7.99296	6.94913	8.58548	8.93351	10.2003	9.00675	10.0175	9.268	9.15802	9.41981	7.75263	7.21931	7.04419	7.94205
9.08713	8.79118	8.77432	9.67635	7.40504	9.09414	8.03715	9.83784	10.4462	11.1391	10.6894	9.78269	10.8329	10.2135	10.4164	11.6868	11.8508	11.6205	10.7039	12.1767	11.2653	11.2646	11.6389	11.0414	9.49543	9.72604	9.57826
4.81713	4.8165	4.68444	4.59985	5.28689	4.62613	5.1209	5.09397	5.09397	6.13657	6.62185	6.05223	5.09397	5.09397	5.09397	5.78286	5.36445	4.96911	4.64916	5.87332	4.681	6.14908	4.69635	4.64768	6.10012	5.97889	4.54041
8.27458	8.67369	8.4814	8.05145	10.019	9.2893	9.39178	8.89762	9.47873	10.2394	10.1684	10.2838	10.0356	9.67733	9.25432	9.38174	9.34265	8.43887	8.68061	8.63465	8.8995	9.87505	9.10312	9.10552	9.47861	9.10312	9.72176
12.8701	12.7294	12.622	12.4829	12.0878	12.4252	11.9102	12.6173	12.9033	12.4615	12.7389	12.5701	12.9927	12.8149	12.2244	12.8565	12.8378	12.8917	12.4628	12.3866	12.7499	12.4376	12.4813	12.6088	13.0493	13.0326	12.7829
12.2511	12.3996	11.7135	12.0561	12.8714	12.6512	12.6249	12.3926	12.2251	12.2268	12.5468	11.6654	11.7067	12.2513	11.8657	12.5881	12.6422	11.5061	11.6579	12.0694	11.5442	11.9268	12.0513	12.2999	12.3821	12.5254	12.5055
14.199	14.2406	13.9204	13.5457	14.7179	14.758	14.6714	14.293	14.4124	14.4703	14.4969	14.4973	14.3184	14.8032	14.6428	14.5027	14.5381	14.0622	14.12	13.5654	13.7463	14.4902	14.426	14.6599	14.8983	14.9474	14.9513
9.0051	8.60707	9.26282	8.73038	7.87641	8.73038	8.65942	10.2201	10.0273	9.24908	10.1195	9.93649	10.2587	10.5309	10.5171	10.3623	10.5151	10.6742	9.19049	9.65025	9.96498	8.86485	9.02737	9.60623	9.2368	9.7427	9.23878
10.6601	10.3755	10.4199	10.2705	10.6599	10.3158	10.2505	7.11407	7.48995	8.73543	7.85801	8.54708	9.14104	8.8472	8.95044	8.32403	8.15306	8.00205	8.09793	7.36879	7.87956	8.07012	7.17556	7.74369	8.40574	8.30855	8.46912
9.43666	9.38032	9.02362	9.14729	9.8269	9.45487	9.68041	9.7677	9.54538	10.1233	9.88839	9.78213	9.86669	10.0976	10.6146	10.245	10.4473	10.3539	9.88531	9.19213	10.1493	9.85405	9.55983	10.2217	10.0056	10.2651	10.5128
9.29597	9.29597	9.75178	9.37698	9.3715	9.12081	9.27259	10.2579	9.78001	9.98918	9.28348	9.83341	9.42231	9.85035	10.7369	9.06872	9.21319	8.36552	8.24724	9.33915	9.05827	9.35012	8.73781	9.14718	9.10576	9.32267	9.77143
10.9599	10.7179	11.3552	10.778	9.37192	10.4838	10.7179	12.0303	12.5172	10.2451	12.7214	12.4771	12.393	11.8605	10.7094	11.8884	11.8597	12.2008	11.5367	11.2655	11.4699	10.8363	11.199	10.7775	11.0124	11.177	11.057
12.8137	12.8202	13.0089	12.7931	12.0776	12.645	12.7349	12.5271	12.5868	12.7812	12.6881	12.8873	12.9718	12.3428	11.6966	12.5249	12.3895	12.5063	12.5043	12.2109	12.6194	12.0411	11.8519	12.2911	12.1453	12.2346	12.4049
8.40777	7.80385	7.46269	7.47877	9.31753	8.53803	8.4309	8.13189	8.24792	5.41148	7.12552	6.20571	5.56843	7.76993	7.90725	7.41893	7.6529	6.46907	6.95291	6.84304	6.01705	7.63771	7.76281	7.95822	8.67654	8.37601	8.04681
11.876	11.9514	12.0574	11.6989	10.6103	11.0734	11.098	11.2136	11.2895	9.7009	11.6399	11.4678	11.8104	11.392	11.5239	11.2526	11.2762	11.3259	10.8733	11.5492	10.7427	10.2466	10.595	10.2453	10.6934	10.9248	10.7039
9.76899	10.0584	9.94987	9.58688	11.5101	11.232	11.1406	11.2883	11.3062	10.9565	11.0993	11.5454	10.9278	11.1186	11.0932	10.7857	10.6986	10.4608	10.4365	10.2737	10.5466	11.4971	11.2226	11.3407	11.1578	11.151	11.266
11.734	11.9163	11.9691	11.6363	12.3482	12.3053	12.2152	12.0888	11.8065	12.5912	11.7686	12.2499	11.8329	12.3586	12.5694	11.9325	11.8934	11.623	11.7258	11.658	11.6236	12.2845	12.1322	12.3183	12.1791	12.2202	12.2011
5.62138	5.62138	5.62138	5.72525	4.91926	5.71717	6.42056	6.64885	5.91466	5.04252	5.58561	5.35328	4.98997	6.03653	5.45094	5.35328	5.89235	5.60776	5.38046	6.18619	5.89455	5.70323	5.69409	6.19361	4.82818	5.34694	5.48787
7.41895	6.83974	7.01996	7.85361	7.4684	7.44124	7.90993	7.27397	7.07426	5.61592	6.80823	6.37469	5.11824	7.20073	7.7422	6.66886	6.87593	7.54672	7.34889	7.66441	7.75354	7.68883	7.21239	7.32125	6.35783	6.499	7.60461
8.15958	8.426	8.16145	8.47549	9.06072	8.73247	8.93117	8.24941	8.19349	8.2258	8.6953	8.63005	8.37772	8.40924	9.06215	7.40388	7.89138	7.40751	7.39493	7.2001	7.41588	8.21211	7.57195	7.89957	7.91355	8.1742	8.57174
10.2871	10.3895	9.96844	10.2181	11.9746	11.9981	11.9689	12.5302	12.7159	12.553	12.9008	12.6931	10.8237	12.6299	12.8308	12.5479	12.3789	12.4852	12.2128	11.8346	12.45	13.302	13.0246	13.2711	12.8453	12.8263	12.603
10.6984	10.5166	10.6866	10.7433	11.4426	11.0585	11.0145	10.5658	10.6568	10.6568	10.7124	10.6568	8.97671	10.5777	10.784	10.8304	10.8315	10.5587	10.0677	10.394	10.1002	10.9166	10.9013	10.6888	10.8588	10.6319	10.799
9.75441	9.86363	9.35858	9.98697	10.4501	10.5996	10.7222	9.50785	9.41143	8.25232	9.32184	8.53569	6.58066	9.61923	8.78102	9.30509	9.23161	8.73251	8.71604	8.6294	8.87725	8.87165	9.63734	9.3428	9.3575	9.17603	9.39109
9.81181	9.47741	9.36038	9.58159	11.051	10.9425	10.9059	10.7921	10.9073	10.6189	11.062	10.1391	9.54678	10.4158	11.1183	10.3919	10.8588	9.42541	9.46081	9.26462	9.26101	10.2871	10.2696	10.3837	10.3621	10.4673	10.3566
2.05099	2.05099	2.05099	2.43486	2.05099	2.05099	2.05099	3.07922	3.44368	2.47296	2.83688	2.42768	2.3994	2.7343	2.38942	3.05847	3.25838	2.62867	2.61646	3.54483	3.24201	2.50078	3.19143	2.49785	2.49785	2.49785	2.49785
11.3718	11.6106	11.8493	12.0707	11.3271	11.483	11.7809	9.71607	9.69237	9.98144	9.81015	9.8805	10.1441	10.2356	9.6555	10.0852	9.98339	9.58573	10.1102	11.0156	10.0007	9.99384	9.84132	9.81522	9.73131	9.18442	9.65046
12.0894	12.0056	12.1954	11.7793	10.0443	10.7545	10.9457	10.8145	10.9597	8.69913	10.9619	10.8305	11.0535	10.3873	10.4504	10.766	10.3682	11.165	10.3383	11.3304	10.8425	9.76684	10.0742	9.87025	10.1328	10.2039	9.86248
10.8306	10.233	10.8165	10.1728	9.15705	9.89822	9.73439	11.662	11.7968	10.3239	11.701	11.4707	11.9928	11.3161	11.3817	11.6871	11.6929	12.0718	11.7457	12.1257	11.5304	11.3897	11.3952	11.5868	11.1451	11.0294	11.2749
9.45623	9.67044	9.57278	9.45623	9.45623	9.22123	9.38781	9.78527	10.154	9.07974	10.2172	9.80309	10.3425	10.2151	9.95772	10.1263	10.2912	10.4566	10.2679	10.8994	10.0498	10.0473	10.031	9.94014	10.3702	9.77579	9.9593
11.8333	11.4579	11.6728	11.4739	11.1424	11.0951	11.1455	11.1899	11.4831	11.057	11.4736	11.4463	12.2097	11.7329	11.7039	11.6402	12.0369	11.962	11.565	12.156	11.7688	11.4283	11.4204	11.1808	11.3394	11.4644	11.3534
12.0322	12.25	12.0249	12.2327	12.338	12.2114	12.3753	11.2657	11.3498	10.9994	11.4118	11.5946	12.272	11.5153	11.1985	11.3043	11.3001	11.3901	11.5776	11.3234	11.6679	11.3904	11.4814	11.6686	11.8174	11.6542	12.0169
10.7892	10.2391	10.5759	10.1608	8.90842	10.0072	9.9768	10.7581	11.7136	10.8423	11.2162	9.21451	6.45112	10.1482	11.8313	10.0219	10.2606	10.6288	9.49297	9.19684	10.5197	8.35306	9.25347	10.7265	10.7978	10.5158	10.4146
14.0087	13.7732	13.845	13.9174	13.1289	13.5065	13.5843	13.1528	13.1959	11.8698	13.1031	13.1207	12.3272	12.7712	13.4009	12.2916	12.726	13.1128	12.494	13.0155	13.2864	11.9789	12.3077	12.9377	13.3204	13.2004	12.6142
10.1072	10.2464	9.71394	9.69175	10.5393	10.1376	10.3669	10.7078	10.8787	9.55659	11.028	10.6406	11.231	10.9363	10.9084	10.6873	10.7823	10.5493	10.7667	10.3088	10.3624	10.995	10.6991	10.6654	10.8174	10.8611	10.6824
8.02333	7.96442	7.69734	8.08352	9.88522	9.28203	9.28055	9.96511	9.89625	9.48843	9.64075	8.61167	7.69095	9.62771	9.59284	9.80548	9.71402	9.50043	8.79901	9.23092	9.81386	10.7022	10.4889	10.2636	10.0176	9.96784	10.2479
7.12602	8.53789	7.23545	7.28475	8.57354	8.04914	8.17127	7.10987	7.23971	6.73117	7.32868	5.71584	4.14983	6.52958	6.00036	6.54501	6.05841	6.98639	7.55927	5.10387	7.22998	7.76861	6.80639	7.15971	7.50058	6.7487	7.31987
8.71144	8.69955	8.83182	8.81463	9.42564	9.18838	9.30589	10.2852	10.1046	9.64611	9.85242	10.1406	9.45263	9.65393	8.82564	9.47051	8.73057	8.5734	8.21601	8.82235	8.82404	9.43449	9.38512	9.3607	9.54324	9.42937	9.65143
6.07657	5.37306	5.44477	5.28753	4.85447	4.51024	4.67116	7.60458	7.28936	5.89867	7.11581	6.669	5.32982	6.85602	6.41517	6.76816	6.68975	7.0039	6.84441	7.0039	7.0039	6.98964	6.34389	5.97305	6.81275	7.0039	5.8641
3.7272	5.84072	5.72249	5.59772	6.32654	5.38	4.8999	2.63121	2.36825	3.41914	2.36825	2.86316	2.70005	2.41628	2.63121	2.63121	2.36825	3.84472	4.78351	2.26447	4.75429	4.91299	3.19905	5.15714	2.75667	1.99514	3.62801
9.60348	9.96983	9.97584	9.6665	9.65656	9.59008	9.06153	8.45356	8.76604	8.52664	8.9982	8.70527	8.8161	9.08709	8.09361	8.93038	8.38031	9.38276	9.54842	8.6777	9.80509	8.98667	9.19688	9.65236	9.32971	8.70734	9.25724
11.0489	10.6812	9.97952	10.9603	12.3392	12.1786	11.7877	12.3184	12.3036	12.172	12.1353	12.2644	11.2813	11.8486	11.4653	12.2158	11.7195	12.1551	12.0401	11.4079	12.0823	12.7201	12.7886	12.6426	12.3123	12.2434	12.3789
9.4168	9.67039	9.66814	9.96983	10.8608	10.559	10.6929	10.3696	10.5364	10.3979	10.3895	10.7191	10.3696	10.3291	9.52444	10.2077	10.2099	10.2183	10.3288	9.98484	10.4292	10.9601	11.0254	11.0277	10.4013	10.3032	10.6041
9.42944	9.35456	9.10654	8.92565	9.28581	9.28581	9.28928	10.7662	10.8854	11.9158	11.2568	10.9486	11.4137	11.5743	11.8818	11.8865	11.9016	10.9309	10.728	10.9609	10.8172	11.6172	11.014	11.5215	11.4874	11.7856	11.8149
14.315	14.3382	14.2836	13.9792	14.3382	14.4049	14.3792	14.4777	14.5055	14.4029	14.433	14.4195	14.4418	14.4743	14.4444	14.4934	14.4729	14.2425	14.2011	14.0902	14.0119	14.1583	14.1963	14.449	14.5435	14.571	14.5181
9.82984	10.0783	9.42553	9.61704	11.6241	10.9393	11.045	11.285	11.3334	10.8655	11.3109	10.8795	10.1284	11.2999	11.2375	10.6096	11.154	10.1531	10.1728	9.49835	9.84291	10.8492	10.6413	10.677	10.9858	10.8741	10.9548
12.4674	12.5795	12.3262	12.3262	12.2458	12.2958	12.1788	11.1344	11.3752	11.0864	11.4251	11.3828	11.5702	11.0366	11.34	11.014	11.1242	11.5609	10.8256	11.3618	11.5055	11.1067	11.0453	10.7397	11.4751	11.2163	11.434
13.9502	14.3474	13.7614	13.796	14.2458	14.1213	14.1037	14.7017	14.7186	14.2039	14.7339	14.5664	14.6479	14.6837	14.8323	14.5445	14.5493	14.2206	14.144	14.1757	14.2621	14.5087	14.1447	14.2973	14.4981	14.4959	14.6299
9.64885	9.47245	9.95519	9.82238	9.16292	9.46277	9.94181	10.7355	10.855	8.43917	10.8826	9.83724	10.8762	10.5988	10.0405	10.524	10.7966	10.9577	11.2063	10.2201	11.4733	10.6115	10.8164	10.9094	10.1789	10.5499	10.4323
11.0622	10.9686	10.8965	11.167	10.5592	10.8651	10.8871	11.6639	12.076	11.7476	12.2275	11.7705	12.2786	11.8954	11.4596	12.0626	11.8526	11.4204	11.8732	11.3915	12.1285	11.2103	11.566	11.8826	11.3093	11.7456	11.7498
9.40897	9.99059	9.82691	10.0407	9.99059	10.3213	10.0716	8.72619	8.43432	11.053	9.42426	9.56856	10.2927	8.84436	9.3046	9.99218	9.87808	7.88145	9.24396	7.9925	7.70572	8.75982	8.6901	8.74365	8.97748	9.37723	9.1764
5.73396	6.22778	5.57394	6.77853	6.48838	7.52233	6.7494	2.78843	2.74966	2.86068	2.65566	2.86068	2.86068	2.86068	2.86068	3.50466	2.86068	1.94671	2.70863	1.99991	1.8321	1.82518	4.12121	3.57545	3.90073	4.93002	3.99698
11.039	10.7767	11.3154	11.533	10.8688	11.1535	11.2518	10.1947	10.272	9.41787	10.6802	10.5591	10.7328	9.96581	9.68633	9.80147	10.2349	11.5044	10.8936	11.163	11.0477	10.6652	10.9858	10.8611	10.0878	10.3204	10.1839
7.84812	8.21556	7.5107	7.70748	8.85076	8.34396	8.52581	10.3183	10.4626	10.332	10.2437	9.38446	5.95231	9.86872	9.83763	10.1216	9.95788	9.35105	9.41355	9.07758	9.45704	10.8515	9.24625	10.5064	9.11452	9.28534	10.5989
10.5682	10.8098	11.1289	11.3654	9.99475	10.7481	10.3955	8.56218	8.61676	7.56467	9.36387	8.83897	9.33105	8.56431	8.72276	9.1775	8.63026	9.98882	9.61738	10.0181	9.72633	9.0675	9.35743	9.56712	8.88839	8.91132	8.82554
8.18611	8.70403	7.90567	8.25909	10.2708	9.97679	9.93659	9.88878	10.3978	8.46521	10.4727	9.20336	7.02996	10.2858	9.66977	10.1928	10.1822	9.65809	9.64461	8.53103	9.73163	10.9092	10.6641	10.9962	10.5527	10.815	10.9144
12.0622	12.2881	11.6945	11.739	13.4552	13.2642	13.0209	12.6743	12.2451	12.7372	13.0782	12.8794	12.4005	12.2521	12.3814	12.2935	12.3802	12.0973	12.1944	11.5618	12.0194	12.689	12.5765	12.7454	12.6057	12.8354	12.6893
2.05099	2.05099	2.05099	2.05099	2.09043	2.05099	2.2492	2.13909	2.14675	2.26047	2.15821	2.13909	2.13909	2.13909	2.13909	2.13909	2.13909	2.15812	2.33038	2.33481	2.15812	2.3442	2.32537	2.32537	2.32537	2.33481	2.33481
12.3075	12.2882	12.1704	12.4488	12.4071	12.1163	12.3023	9.71033	9.73059	10.6048	9.97476	9.89367	9.06353	10.034	10.2339	9.98576	9.98413	9.79885	9.79929	10.1688	10.1763	9.74214	9.9667	9.96993	10.0895	9.87936	9.62698
9.17748	9.48628	8.63824	9.1188	10.8034	10.3148	10.3662	10.1472	10.2902	10.9553	10.2071	9.39315	6.14303	9.8918	9.52286	9.93415	10.0625	8.90349	8.47337	8.78064	8.42501	9.68331	9.42489	9.46288	9.87275	9.66821	9.63042
9.95855	9.7191	9.32309	10.5446	10.4431	10.4039	10.1903	9.71797	10.3064	10.6642	10.3327	9.92971	10.9173	10.0608	10.4774	10.5133	10.6521	10.352	10.8783	10.8206	10.2207	10.4586	10.4813	10.4569	9.66052	10.2026	9.56933
12.1616	12.0012	12.2924	11.9914	11.0581	11.8283	11.7962	12.6974	12.8032	12.3167	12.6312	12.7447	13.2575	12.7811	12.5236	12.596	12.5745	12.9447	12.437	12.7287	12.5188	11.9949	12.267	12.4354	12.6621	12.7093	12.397
9.81957	9.65491	10.3119	10.0885	10.0885	10.1012	10.7881	10.1333	9.80875	9.37696	9.89754	10.5489	9.67821	9.77084	8.88539	9.26336	9.16228	10.389	10.0412	10.159	10.858	10.8524	10.9011	10.4747	9.41899	9.06045	9.7646
11.8306	11.8667	14.2724	12.4155	12.9993	13.1871	14.1467	13.3809	13.4357	12.6914	11.9549	13.7759	12.0809	12.8808	11.604	11.6737	10.9364	11.2231	10.618	10.8274	11.2174	13.1927	11.6738	12.0313	11.602	11.8553	11.6529
11.4343	11.131	11.1937	11.0871	10.6552	11.0029	11.0605	11.3983	11.3219	10.7644	11.4984	10.6164	9.29538	10.674	9.73788	11.0062	10.8749	10.2044	9.43983	9.73306	10.1908	9.49818	9.84527	10.0873	11.1009	10.8363	11.0143
10.2178	10.3445	9.87174	10.0643	10.555	10.3633	10.4199	11.4197	11.4261	11.1606	11.999	11.8635	12.0574	11.9789	11.0261	11.4487	11.7537	11.7952	11.4701	11.1246	11.5908	12.3831	11.3456	11.7624	11.8555	11.6817	12.0187
12.2794	12.4557	12.0385	12.733	11.5237	12.4257	11.4748	8.99665	10.3153	10.9205	10.3318	9.45209	11.1912	10.1645	10.2137	11.1314	11.1962	11.3215	11.1689	11.3736	10.5777	10.3754	10.2853	10.0296	9.73167	10.4711	9.25907
7.00374	6.38124	6.64379	8.02105	6.34274	7.52907	7.00374	6.51143	7.71433	7.24518	7.74762	5.57221	8.58978	8.03469	7.35587	8.99597	9.19585	9.51827	8.72939	9.76941	9.07718	8.36541	8.93689	8.65963	6.15526	8.04741	6.98003
8.66418	8.35901	8.34163	8.93685	7.65307	8.57319	7.83739	7.01872	8.20111	9.19084	8.83321	6.7491	8.34809	8.7816	8.12608	9.7742	9.88295	9.87695	9.11762	10.0115	9.31441	6.80609	8.9923	8.96313	9.01515	9.40131	7.95566
7.30331	7.59402	7.48598	7.57043	8.31257	7.74969	8.25637	9.52708	9.40315	9.65435	9.97521	9.81085	7.64372	9.29189	9.18656	9.03557	9.00267	8.78111	8.89306	8.54186	8.87395	9.89568	9.04829	9.01784	8.73297	8.6156	8.87429
7.10837	6.85579	6.70663	6.74495	8.09126	6.87252	7.34464	8.47756	8.6503	5.69641	8.2802	5.28921	3.52546	7.53197	7.04573	8.00542	8.38883	7.69014	8.23091	7.32178	7.52335	9.2336	8.65339	7.78478	7.19781	6.99384	7.54501
2.05099	2.05099	2.05099	2.05099	2.99397	2.05099	2.05099	4.52523	5.26976	2.7959	5.17228	1.38697	1.66494	4.84642	4.72851	5.38691	6.09767	4.61864	4.6473	4.44615	4.6473	4.6473	5.39625	4.6473	5.45859	5.6382	6.43675
6.56946	7.17373	7.38623	7.46497	9.10224	8.54927	9.266	9.56066	9.3176	10.2422	9.44118	9.6387	5.9611	9.30941	8.82322	8.54399	8.79589	8.57601	8.62306	7.7925	8.39226	9.75202	9.11279	9.34615	9.12558	9.13219	9.41346
12.4762	12.6027	12.2567	12.3378	12.1166	12.2937	12.0026	11.6457	11.8314	11.6609	12.0175	11.7535	12.0421	12.105	12.0852	12.1157	11.8499	11.6474	11.5558	12.075	11.854	11.7239	11.6705	11.6445	12.1054	11.8046	11.7988
14.6887	14.776	14.8922	14.927	14.4038	14.6311	14.5674	13.6463	13.429	13.478	13.6721	13.4373	13.3634	13.6846	12.7337	13.172	12.9846	13.106	13.1127	12.8073	13.2168	13.0368	13.1175	13.2593	13.5268	13.3018	13.4821
13.0979	13.382	13.8784	13.688	13.0132	13.4007	13.4409	13.1246	12.9624	11.7009	12.7885	12.3275	11.2608	12.8114	10.8737	12.2919	12.2058	12.3864	12.4301	11.6588	12.9593	12.6922	12.8624	12.8922	12.7904	12.6277	13.0976
11.043	10.8449	10.6005	11.3561	11.7284	11.6002	11.3443	10.7013	11.3894	12.0465	11.6901	10.9821	11.6227	11.559	11.7138	11.8606	11.5817	11.9546	12.1113	12.5101	11.7399	12.1485	12.3446	11.9688	11.448	11.6059	11.4091
10.1077	9.49787	7.67934	8.32842	9.78173	8.82354	8.17053	8.75331	9.85156	8.77089	10.0017	8.39377	12.2896	9.55229	9.54625	9.33798	10.315	10.1363	9.56364	11.0352	9.64822	8.80343	9.75805	8.20356	9.10328	11.3632	8.65659
12.9215	12.9648	13.1014	12.9233	12.8182	13.0259	12.9233	12.5707	12.7084	12.9374	12.457	12.7881	12.9199	12.6446	12.8361	12.8921	12.8999	12.5371	12.565	12.8903	12.6748	12.8146	12.7675	12.6841	12.7768	12.664	12.7265
9.19969	9.38622	9.22164	9.17661	8.54699	9.13744	9.16499	7.18973	7.30013	3.80829	5.38697	8.01352	7.37491	5.38697	5.13479	5.49915	5.50876	9.10054	7.2324	7.91207	8.07626	8.62637	5.77677	9.07177	9.19197	6.45071	8.23362
8.27632	8.90246	8.60949	8.77284	7.44012	7.98528	7.76271	8.63022	9.16587	8.62123	8.0217	10.2096	9.53072	8.80964	8.39869	7.88606	7.92318	9.9197	8.10564	9.48728	10.2489	9.33999	7.42743	9.62695	9.92232	7.9651	8.70824
13.9844	14.0222	13.7604	13.7268	13.9813	13.8845	14.0084	14.2096	14.0495	13.972	14.1641	14.1323	14.2255	14.114	14.164	13.9124	14.0629	14.3212	14.1209	13.8981	14.2805	14.3759	14.2326	14.391	14.3334	14.3041	14.3833
8.00058	8.00058	8.27119	8.85718	6.47632	7.90067	7.97678	7.3803	7.95164	5.52311	5.67905	5.09781	4.11876	6.17431	7.00416	6.93975	7.36575	7.05512	6.85828	7.70904	8.37616	5.79917	7.79829	6.8111	7.58483	6.27228	7.89946
3.44116	2.49484	5.3732	4.07407	2.30366	2.24559	2.05099	6.48751	7.47445	2.0302	5.05372	5.11226	4.32296	5.56877	5.54957	6.31615	6.49515	8.57476	6.09818	8.61463	7.33133	4.6595	7.2695	4.65568	5.66734	5.67828	6.06803
10.6058	10.615	11.1511	10.8712	9.63609	10.4942	10.034	11.8025	10.9555	11.1249	10.7318	11.2393	11.4191	10.9612	11.6988	11.2294	10.9609	11.244	10.5445	11.6436	11.4719	10.8235	11.2655	11.0561	11.0987	11.0562	10.7492
8.15418	8.4793	8.83842	7.82134	6.47662	6.94459	7.15951	7.72301	9.02503	6.76507	8.66948	7.38781	7.88589	7.54743	6.09227	8.54216	8.64236	10.3733	8.70183	10.2597	9.15638	9.34493	8.87015	8.1159	7.39513	7.63436	7.77983
9.47786	9.71367	9.29868	9.26237	8.21902	8.22329	8.50587	9.10016	9.52294	7.98115	9.30357	8.69931	9.3246	8.81133	7.3221	8.71448	9.25031	10.8623	10.4046	10.9524	10.3167	10.0759	10.122	9.31898	7.9238	8.18111	8.70182
9.08509	8.94626	8.40807	8.17623	7.31157	7.6819	6.74468	6.59842	8.23101	4.27017	8.01081	4.66099	5.29367	7.41173	5.45132	7.84354	7.63922	9.05253	7.8273	9.38542	7.66235	6.25826	6.58392	5.59739	6.88096	7.35144	5.24375
12.4231	12.0326	12.3719	12.1311	11.4918	12.1311	11.9557	12.9365	13.05	13.1221	13.2105	13.0006	13.3669	12.9522	12.8506	13.0623	13.0016	12.7831	12.7522	12.7233	12.8735	12.4911	12.8989	12.4785	12.6248	12.8609	12.7997
10.8176	10.142	9.98899	10.3803	10.1739	9.88057	10.1739	10.9165	11.3346	10.3461	10.9422	10.7193	11.747	11.3404	11.2074	11.6146	11.8473	11.2767	10.6021	10.9497	11.1853	10.8505	10.988	10.805	11.0934	11.2422	10.9793
12.08	11.8079	11.6326	11.5753	10.8682	11.0433	10.8871	11.4562	11.4736	11.4862	11.6491	11.2633	12.0637	11.6515	11.443	12.0619	11.9999	11.4823	11.3567	11.3015	11.8189	11.0737	11.2176	11.2204	11.6494	11.9885	11.5493
11.2968	11.235	10.7661	11.3121	11.6316	11.4273	11.3799	10.7772	10.9402	10.012	11.1971	10.7451	11.0994	11.3259	10.6223	11.3596	11.1424	11.4299	11.232	10.8311	11.4519	11.5446	11.512	11.3926	11.2711	10.7959	11.4251
10.0415	9.84454	10.2926	9.63267	8.50204	9.45464	9.12069	11.2755	11.4458	11.1139	10.7297	11.4094	11.2436	10.9987	11.3094	10.9113	10.8378	11.0559	10.8601	10.7785	10.445	10.2759	10.5504	10.4793	11.0311	11.0619	10.8951
13.2945	13.1112	13.1129	12.909	13.1921	13.2283	13.4232	12.648	12.6533	11.7257	12.403	12.711	12.9342	12.7619	12.761	12.5468	12.5504	12.1453	12.3819	12.21	12.2254	12.1093	12.231	12.4326	13.1182	12.8948	12.9953
12.7927	13.1118	12.9698	12.89	13.3436	13.1118	13.4217	12.5572	12.8418	12.6642	12.6314	12.8762	13.0959	12.9335	13.0101	12.7293	12.7974	12.4803	12.5329	12.5921	12.4523	12.6869	12.5067	12.5867	13.0385	12.9287	13.0106
9.06267	8.4311	10.7233	10.109	9.1727	9.98698	10.2123	10.2589	10.1286	9.84404	9.74199	10.9489	10.2439	9.68396	9.37512	9.70694	9.61352	9.41481	8.97561	10.0477	9.72994	9.52758	8.42632	8.55511	8.50104	9.73099	8.63333
2.05099	2.05099	2.33041	2.05099	2.05099	2.05099	2.05099	4.90346	5.17823	1.84426	3.30219	2.37643	1.84426	2.57285	1.87824	3.7209	4.5438	2.89791	2.89791	2.89791	2.89791	2.89791	2.89791	2.89791	2.89791	2.89791	2.89791
4.80583	4.30096	5.00818	4.62515	4.21872	4.21915	4.21872	5.53685	5.62026	5.53685	5.98623	5.53685	5.62026	5.79938	5.62026	5.62026	5.84307	5.87448	5.79148	5.79148	5.79148	4.32811	5.79148	5.79148	5.79148	5.79148	5.79148
10.2919	10.4251	10.7676	11.2017	10.5458	10.4535	10.3887	9.66961	9.62164	10.8248	10.5285	9.72343	10.6749	10.7462	10.7626	10.4446	11.2417	10.6286	10.917	10.7083	10.5773	10.1802	10.5449	10.0648	10.2894	10.691	10.0464
9.60245	9.38782	9.7305	9.69778	9.37297	9.55163	9.55757	9.16449	9.47266	8.5754	9.51836	9.16004	10.3651	9.27204	9.4911	9.5239	9.50531	9.90217	9.39376	10.2602	9.69746	8.98258	9.8801	9.48402	9.39496	9.5712	9.44268
11.3927	11.3996	11.5304	11.3391	10.2751	11.1762	11.2506	12.4047	12.6762	12.4467	12.7184	12.6335	13.109	12.5906	12.8546	12.9017	12.7897	12.6486	12.6843	12.901	12.3238	12.308	12.4609	12.3459	12.4795	12.7785	12.1684
9.16166	8.5978	8.07453	8.57637	8.37286	9.24173	8.55994	5.33154	5.33154	7.91401	5.33154	6.21263	8.56419	6.21877	9.26755	7.40702	6.81633	5.6494	6.38459	5.14593	5.69182	5.52472	6.69384	6.25678	6.575	6.40406	5.97346
6.97131	7.37541	6.97131	6.97336	6.97297	6.83959	6.31842	8.77046	8.50834	8.51246	8.26965	8.20831	7.48409	8.37534	9.23719	8.15699	8.34143	7.56558	8.77263	7.70101	8.30475	8.81019	7.57601	8.16185	8.5365	8.02131	8.84326
11.7723	11.1998	10.5677	11.8506	11.9301	11.8232	11.6972	11.2836	12.1643	12.1563	12.1759	11.8007	12.1221	12.282	12.6727	12.6026	12.232	12.4194	12.3813	12.6723	12.7499	12.8968	12.9869	12.9437	11.874	11.9099	11.7502
9.68499	9.56531	9.21612	9.44842	10.0119	9.88853	10.1473	9.03004	8.91191	9.06735	8.82817	9.18513	9.28144	8.57105	8.24393	8.65179	8.91219	9.18574	8.59756	8.40771	9.06189	8.80001	8.52549	8.84888	8.5877	8.98069	8.93572
12.0012	12.0012	12.24	12.1522	11.5679	11.8591	11.9428	12.3083	12.3061	11.807	12.0804	12.3647	12.0194	12.0211	11.6953	11.9172	11.7192	12.5503	12.3665	12.3401	12.5599	12.1959	12.2287	11.8794	11.7536	11.7066	11.8831
13.4875	13.2846	13.5952	13.4758	13.4524	13.5702	13.5577	14.0907	14.112	13.6735	14.166	14.2438	14.2533	14.093	13.8253	14.0162	13.8676	14.0672	14.0657	13.8573	14.1373	13.9588	14.0774	14.0222	13.7818	13.7678	13.8648
9.52274	9.52274	9.77025	9.52274	9.37473	9.52274	9.52274	11.2068	11.3416	11.4102	11.4084	11.67	11.5937	11.407	11.2061	11.5296	11.3003	11.1248	11.1305	11.7378	11.3737	11.1248	11.1248	11.1248	11.1248	11.1248	11.125
9.97433	9.87073	9.57051	9.32236	9.24099	8.54639	8.60333	9.77124	9.25405	8.21812	8.88418	9.58241	9.85576	8.68657	9.20019	8.62403	8.83763	8.57629	8.18514	8.71168	7.09168	7.0383	6.79415	6.52284	7.68037	8.00778	7.05021
8.13044	8.35056	8.04018	7.90238	8.46051	8.13044	8.19725	9.3256	9.44212	10.5791	10.2298	10.1049	9.09984	9.90296	10.9866	10.1582	9.83752	8.84266	9.67219	9.16325	9.3492	9.53573	9.63199	9.56048	10.0762	10.3016	10.0229
12.6208	12.5073	12.4444	12.4797	12.9974	12.8923	13.2192	13.001	12.9939	12.8189	12.8166	13.0544	12.1273	12.9218	13.0295	12.7062	12.5632	12.5749	12.8155	12.2012	12.6181	13.0532	12.5871	12.9946	13.0297	12.8109	12.9579
10.6213	10.7862	10.9569	10.6983	11.288	11.3921	11.307	9.20483	9.0244	9.4308	9.02717	9.88528	9.72793	9.32418	9.44187	8.9556	8.69303	9.36059	9.52105	8.82738	9.37541	9.67023	9.70162	10.0541	9.61855	9.29342	9.95566
13.4839	13.3764	13.1363	13.0165	13.0184	13.0406	12.7049	12.9143	13.1045	13.6455	13.4038	12.7576	13.6646	13.1882	13.1443	13.5907	13.8967	13.2979	13.0056	13.1359	13.2688	12.7814	13.0625	12.7956	13.6175	13.6445	13.7335
12.1825	12.1609	11.729	11.4808	10.9634	11.2193	10.8157	11.5944	12.0229	11.6797	12.3328	11.4547	12.8376	11.7374	11.2928	12.5496	12.8793	12.779	11.8708	11.7872	11.8196	10.7263	11.2532	11.3163	12.1889	12.4121	11.724
11.0591	11.2548	10.9988	11.0978	11.4015	11.4656	11.4077	10.9214	10.7885	11.1996	11.1552	11.3274	11.1961	10.6867	10.9312	10.6409	10.5432	10.7588	11.0293	9.97064	10.7637	11.0249	10.5535	10.8837	10.8306	10.7916	11.0766
11.863	11.918	11.8196	11.7472	11.9173	11.9897	12.0901	11.9259	11.9547	11.2699	12.2118	12.1073	12.1741	11.6786	11.1965	11.6143	11.67	12.1009	12.0567	11.5553	11.666	12.2058	11.7542	12.1997	12.1638	12.1422	12.1883
13.5852	12.9643	12.2371	12.7746	13.0296	12.4674	12.686	10.5187	10.3287	9.60041	10.811	10.5507	12.0082	10.9918	10.8419	11.1873	11.6518	11.5504	11.3494	10.4731	11.353	10.6725	11.083	11.1241	11.613	11.7303	11.6725
6.3485	5.40844	5.24347	5.40844	6.23577	5.09531	5.40844	8.31692	8.63309	6.52152	9.18811	8.22226	9.21976	9.24965	8.51788	9.2877	9.56504	8.98662	8.59408	8.22309	8.76973	8.74199	8.64782	8.15936	8.79412	8.76973	8.76281
11.3704	10.8653	10.9898	11.1061	12.0825	11.2443	11.7437	11.5595	11.6059	11.6099	12.0703	12.0881	11.9675	12.1469	12.6147	11.5595	12.1778	11.3306	11.1172	11.2388	11.543	11.552	11.6133	11.7444	11.9206	11.7062	11.9667
6.78199	7.32568	5.787	6.74686	6.67343	7.60409	7.43409	7.40983	6.5906	3.97446	6.14601	5.31012	3.03235	6.36638	6.14601	7.31816	6.7813	6.00309	6.60894	5.97058	6.38305	4.88852	7.06655	6.71224	6.89819	6.48688	7.07398
5.72338	4.92278	4.92278	4.99182	4.92278	4.76451	3.86321	3.08783	3.08783	3.08783	2.44841	3.08783	3.08783	2.50271	3.08783	3.08783	2.63683	3.14593	2.35223	2.00299	2.26202	2.28514	1.9147	1.92709	3.62943	3.38379	4.30025
12.9017	12.8423	12.5034	12.5034	12.008	12.5034	12.1169	11.3537	11.4017	11.5741	11.5583	11.6066	11.7974	11.6736	11.5339	11.7146	11.6902	11.3687	11.0288	10.7288	10.8131	10.3389	10.6771	10.7737	11.7601	11.6946	11.2942
8.33999	8.74391	7.65146	7.60055	7.22941	7.11931	7.22941	3.51343	3.51343	4.38803	4.5317	3.86559	6.57111	5.71877	3.51343	5.07766	5.63095	4.87688	3.96903	3.20032	3.59961	2.61019	3.36915	3.13726	5.11618	4.78622	4.81122
12.0621	11.9482	11.5318	11.8547	12.0299	12.081	12.1014	11.6444	11.8264	12.4378	12.1633	12.0061	12.5094	12.095	12.0569	12.1712	12.2001	12.2444	12.1287	11.4706	12.1664	12.247	12.3399	12.3861	12.3812	12.1526	12.3513
8.54812	7.28584	7.07223	7.28584	7.28584	6.82359	7.38543	9.19737	9.50687	5.05639	9.83262	8.34564	9.21653	9.41526	8.53294	9.49207	9.65417	10.9069	10.3809	8.89945	10.0719	9.71037	9.97439	10.0007	8.04602	9.23353	8.71679
10.7823	10.7762	10.6927	10.4067	11.3609	10.9472	11.0566	11.0941	11.2598	11.976	11.1203	12.038	11.6583	11.2912	11.3676	11.3227	11.4499	10.7369	11.3493	11.1363	10.6689	11.5513	11.0686	11.2912	10.9243	11.2048	11.1732
11.2571	11.1169	11.5439	11.1304	10.0855	10.4933	11.1169	12.598	12.7509	10.4338	11.955	12.7434	12.5667	12.1533	11.3467	11.9643	12.0028	12.069	11.7628	11.9337	11.9873	11.1504	11.1064	11.373	11.7122	11.7075	11.6971
2.8463	2.65123	4.40852	3.14408	2.60593	3.36215	2.95841	3.16097	2.22005	2.09409	2.09409	2.09409	2.09409	2.09409	2.09409	2.09409	2.09409	2.05824	2.05824	2.05824	2.79975	2.05824	2.17004	2.1166	2.05824	2.08811	2.05824
8.86685	8.42434	10.8587	10.7869	7.60454	10.0407	9.90075	9.84218	8.96779	8.36864	9.22029	10.1458	7.87749	8.94887	9.27319	7.25294	8.2177	8.9931	8.88128	8.7991	9.77566	7.93054	9.08374	8.4549	7.23747	8.01813	7.82281
7.23293	7.42445	7.69169	7.55796	7.66335	7.55796	7.55796	7.67177	8.1839	8.41709	8.10341	8.39563	8.00261	8.15356	8.6607	7.90471	8.06418	8.14635	7.18039	8.45292	8.38731	8.48766	8.16277	8.55611	8.12746	8.20313	7.92015
10.4719	10.6898	10.3349	10.2748	10.5333	10.439	10.439	10.3997	10.6438	10.6801	10.9608	10.6606	10.9698	10.4225	10.0868	10.6183	10.4685	10.7039	10.6359	10.4005	10.1899	10.6491	10.4068	10.4998	10.5785	10.4535	10.357
7.49716	7.61904	7.02364	7.44713	7.17588	6.86943	6.83999	5.74692	5.24107	6.89858	6.32394	6.72034	7.34861	6.27458	6.34795	6.5959	6.88329	6.62383	6.59691	7.0508	6.60893	6.10874	6.2551	6.36384	5.74411	6.78204	6.55664
10.3797	10.4523	10.4221	10.3488	10.4758	10.4523	10.5249	10.4029	10.4091	10.2714	10.7895	10.3742	10.7738	10.4423	10.2016	10.628	10.4278	10.5108	10.6539	10.3698	10.4552	11.1485	10.5336	10.7146	10.4874	10.5226	10.6029
11.1962	11.4772	11.2889	11.4111	11.3019	11.1139	11.2888	9.92941	9.98664	10.105	10.18	10.2348	10.4223	10.2642	10.1866	9.91045	10.0164	10.2602	10.0731	9.95346	10.4311	10.1893	9.75243	10.2798	10.2852	10.2757	10.2329
9.71643	9.86386	9.32502	9.49988	11.119	10.4137	10.614	9.57984	9.74472	9.72728	10.1633	9.36303	10.6817	9.85605	9.97748	9.91991	9.93992	9.17987	8.99586	9.00272	9.08727	9.90554	9.27772	9.70411	10.0258	10.0009	10.055
9.23951	6.91305	10.0147	8.19566	8.99858	9.32047	10.4743	11.1486	11.6933	11.5677	10.3567	11.3709	6.34698	11.4879	11.6394	11.8846	11.6442	10.5888	9.86625	10.0117	11.0417	11.2194	11.1608	13.1865	10.6173	10.9071	10.0858
9.11325	9.64497	9.14119	8.77829	10.0972	9.9285	9.60025	9.5839	9.23996	10.2195	9.62404	9.40442	8.88781	9.20039	8.69387	9.05189	9.49594	8.89479	9.6308	9.30518	9.39095	10.4952	10.1129	9.81811	9.45115	9.31732	9.62284
8.43777	8.44692	8.39464	8.75199	9.27289	8.85598	9.37401	8.9226	8.96148	9.90926	9.15243	8.60708	6.19251	9.14773	8.78446	9.05695	8.53375	8.47196	9.26316	8.87858	8.49369	9.42053	8.83936	8.74948	8.36677	8.45358	8.78993
9.28681	9.10009	9.21007	9.30795	8.3575	8.73282	8.74801	10.6473	10.8568	9.94977	11.0047	10.6413	10.3922	10.8293	10.3254	10.8406	10.9392	11.2937	11.7928	10.9133	11.7342	10.2901	11.285	11.0802	10.7554	10.8048	11.1263
11.9938	12.1269	12.2787	11.8915	11.1323	11.7083	11.3876	11.8157	12.034	12.2274	12.1759	12.1896	12.4488	12.1635	11.8889	12.0955	12.1308	12.3678	12.3597	12.1	11.8827	12.0459	11.8466	11.8946	12.0966	12.2643	11.8242
2.65551	2.65551	2.8248	2.65551	2.65551	2.65551	2.65551	3.70678	3.22104	3.76329	3.20522	3.20522	3.20522	3.70714	3.28371	3.47408	4.07442	2.97503	2.70139	3.80242	3.30286	3.80242	3.80242	3.39479	3.48454	3.25268	3.80242
10.5467	10.9803	10.5913	10.7385	9.68068	10.1112	10.3259	7.15805	7.15805	7.15805	7.20074	7.33717	7.35705	7.15805	7.31628	7.32676	6.99936	7.13785	6.97433	7.69077	7.25871	6.20577	6.67521	6.49206	6.99601	6.72741	6.53455
9.88906	10.217	9.14016	9.88698	9.56163	9.18733	9.17426	3.05065	3.01197	3.05065	3.05065	3.05065	3.05065	2.98694	3.05065	3.05065	3.05065	3.43607	3.57175	3.44799	3.92347	2.76369	3.11697	3.39963	3.36489	3.20538	3.19838
9.8519	10.7211	9.34955	9.72987	10.3158	9.80294	9.68151	10.0728	10.6621	10.8449	11.3734	10.6285	11.0415	10.9708	10.6285	10.971	10.7846	10.4064	10.9585	10.7131	10.7036	11.0003	10.6841	10.6987	11.1345	10.8263	10.6663
6.93889	5.97674	5.1267	6.55516	7.36806	6.74336	7.33384	7.01258	7.04542	7.78954	7.19933	8.02446	8.36954	7.26249	6.81412	7.54166	7.23076	7.2023	7.04632	7.03974	7.25597	7.55048	7.34576	7.55618	7.23682	6.95381	7.03629
11.1028	11.0099	11.3883	10.9839	10.5442	11.0845	10.9711	11.5371	11.3998	12.272	11.7275	11.9458	12.4111	11.9324	12.1968	12.0701	12.1034	12.1478	12.1467	11.8963	11.6986	12.006	11.6863	11.861	11.9119	11.8871	11.5747
10.1895	9.84213	10.0167	9.93332	9.43217	9.69683	9.96191	10.4206	10.6844	10.0835	10.9902	10.775	11.5564	10.7438	10.4498	11.0794	11.006	11.0999	10.7715	10.9278	10.8871	10.4113	10.5159	10.492	10.5186	10.626	10.4878
10.7098	11.1746	10.4108	11.3393	12.2749	12.1056	11.9285	11.8956	12.5523	12.7248	12.4463	11.8869	12.1041	11.9559	11.8669	12.7294	12.5686	11.4586	11.6047	11.7792	11.5941	12.4403	12.0966	12.1226	11.3476	11.7774	11.1337
8.3151	8.21712	7.55885	8.14592	8.71988	8.16032	8.16894	8.60904	9.10557	9.07388	9.54653	8.01262	6.15354	8.66332	9.11776	9.27023	9.15871	8.21735	7.80168	8.56784	8.03225	8.45083	8.01881	8.16975	8.66735	8.74319	8.73213
12.0322	11.781	11.6848	11.6388	11.075	11.3619	11.4175	11.0097	10.9426	10.5124	10.6422	10.4814	10.9011	10.9891	11.3122	10.3425	11.2059	11.0747	10.5311	10.7042	10.8371	9.81548	10.8175	10.8377	10.5848	10.9357	10.6464
11.0934	10.4616	10.2761	10.3277	10.176	10.1909	10.1857	10.9037	10.8451	9.78753	10.4216	10.0642	10.5695	10.4716	10.7208	9.96381	10.5342	10.1979	9.81474	9.92955	10.226	9.63882	10.7284	10.2169	10.0743	10.2609	10.4608
7.19513	7.20159	6.52691	7.19513	7.70764	7.15547	7.32932	9.16128	9.68138	7.60185	9.69746	7.42991	5.70527	9.04904	7.8644	9.30239	9.22482	8.06851	8.94957	8.33064	8.65711	9.53138	10.1059	8.94833	8.6689	8.74433	9.20959
13.4236	13.3431	13.1418	13.2966	13.2145	13.1764	13.0669	10.6997	10.7402	11.1284	11.564	10.0308	9.35424	10.3383	10.1047	10.5523	10.479	10.5751	10.662	10.3811	10.4376	9.60378	10.31	10.2846	10.4795	10.4169	10.641
11.5207	11.6985	11.0395	10.9944	10.5223	10.859	10.3445	11.3093	11.5769	11.3366	11.4797	11.4861	11.6897	11.1225	11.4122	11.961	11.7091	12.0123	11.685	11.7194	11.5466	11.2004	11.3674	11.0388	11.4584	11.5779	11.3007
2.05099	2.05099	2.05099	2.05099	2.05099	2.05099	2.05099	5.3313	5.3321	2.34505	4.34199	1.42375	1.42375	4.23372	3.9218	4.90862	4.96421	4.35182	4.33742	4.33742	4.33742	4.33742	4.33742	4.33742	4.35807	4.33742	4.33742
12.9278	12.8182	12.6734	12.9486	12.5253	12.8182	12.6738	12.9482	12.9929	12.4707	12.9756	12.9635	13.3781	13.1628	12.9084	13.1952	13.3838	13.079	12.8751	13.4187	13.1122	12.827	13.0331	12.798	13.1696	13.1051	12.9887
4.61572	4.72594	4.61572	4.61572	4.61572	4.61572	4.61572	9.21257	8.73888	7.95645	8.91945	6.8066	3.91498	7.97375	9.66972	8.68569	9.1747	7.56862	6.76399	7.53232	6.91955	8.24342	6.38848	7.15892	8.146	7.02951	8.24342
9.96709	9.79383	9.77871	9.67268	8.55784	8.86601	8.65049	8.49866	8.4435	8.35772	9.07533	8.25136	9.69784	8.71617	8.05225	8.69464	9.15449	8.68884	8.07325	8.58453	8.41501	7.27078	7.65115	8.01662	8.35487	8.42009	8.47552
11.3556	11.3556	11.2647	11.2848	11.2923	11.3586	11.7991	11.7482	11.9062	11.5648	11.7568	11.8541	12.3409	11.8908	11.1186	11.8832	11.8882	11.7948	11.9857	11.2167	11.6271	11.8954	11.7698	11.7942	12.2388	11.8864	12.4688
5.12441	4.2998	4.17656	4.04828	4.8389	4.2998	4.21224	2.4736	2.31739	3.45589	2.48152	2.44782	2.72229	2.66745	2.5424	2.44782	2.54178	2.09596	2.22369	2.15599	2.15169	2.22369	2.22369	2.24752	3.01852	3.19093	4.57755
6.87234	7.30287	6.33668	6.9674	8.02176	6.9674	6.98323	10.7673	10.7227	10.9107	10.9044	9.26697	8.20232	10.4022	10.7262	10.7182	10.6387	9.36411	10.3665	9.43308	9.87525	9.79732	9.71675	9.73265	9.71675	9.71675	9.71675
11.2774	11.0335	11.3475	11.1692	10.9478	11.1411	11.1852	12.3038	12.2623	11.844	12.6272	12.1157	12.8832	12.3611	11.9509	12.3118	12.4249	12.0058	12.0443	11.39	11.8156	11.8246	11.6963	11.7578	12.0103	12.0011	12.1531
7.53783	7.41495	6.65546	7.41495	7.72342	7.31758	7.4909	9.51637	9.83416	7.56236	10.1995	9.38459	9.51637	9.53992	8.67819	9.79765	9.76721	9.55109	9.19229	9.85508	9.508	9.6162	9.2829	9.14104	9.68618	9.28446	9.38723
9.5186	10.6688	9.52567	10.1067	10.7443	10.4632	10.1035	9.48144	9.59919	9.49482	9.94977	9.79762	10.1385	9.6382	9.0862	9.6657	9.44557	9.11486	9.78576	9.15228	9.55546	10.3694	9.69602	9.38771	10.194	9.36382	9.70562
8.72919	9.08112	8.00343	8.32715	9.78862	9.51322	9.21742	9.4337	9.5111	8.38277	9.54234	9.14058	8.98251	8.98002	8.44194	8.97512	8.92023	8.70375	8.86547	8.42459	8.93171	9.26586	9.04017	9.12747	9.50389	8.99449	9.19907
10.6649	10.7558	10.3463	10.5905	11.148	10.8115	11.2323	10.4884	10.6238	10.536	10.7969	10.3345	8.63323	10.5549	10.4294	10.5169	10.5067	10.3791	10.6276	10.2903	10.6212	10.6695	10.368	10.8785	10.5211	10.5083	11.0109
10.1181	10.3153	9.11931	9.46971	9.9492	10.3688	8.9998	8.52091	9.14766	9.18969	9.80067	7.96716	9.06263	9.25918	9.26189	9.86002	9.44755	8.6049	9.17861	8.93756	8.61477	8.17408	8.39718	8.51978	9.18591	9.59983	9.43739
10.4181	10.2119	10.03	10.039	10.1248	10.2119	10.3113	9.81668	10.1017	10.2507	9.8465	10.1942	10.6499	10.1002	10.0871	10.2575	10.325	9.75705	9.94782	9.98577	10.1584	10.1568	9.88197	9.93923	9.98187	9.85922	10.2703
7.09497	6.48044	7.02295	6.48044	6.30686	6.38178	5.97327	4.13108	4.15845	4.97444	4.30739	5.05378	4.97444	4.93836	5.19108	4.30739	4.09338	4.44577	4.21231	5.0359	5.81992	4.79725	4.10566	4.67319	4.5679	4.91321	4.55012
5.95955	6.07342	4.42607	5.5115	5.7763	5.42818	5.71162	6.81278	7.28889	5.23534	7.7022	5.52208	7.15852	7.65345	7.17608	7.52475	8.08408	6.98283	8.61944	7.07434	7.4136	7.22065	6.98283	6.98283	7.98641	6.98333	8.09037
11.9273	11.9571	11.3041	11.659	11.7174	11.6332	11.7013	11.0528	11.34	11.2038	11.5438	11.2257	11.5877	11.6182	11.5307	11.5834	11.7111	11.3359	11.3292	11.0097	10.9602	10.409	11.0511	11.1552	11.4682	11.569	11.3392
10.3712	10.5511	10.4532	10.312	9.68649	10.2789	10.2826	11.777	11.6909	12.1131	11.5343	11.935	12.3502	11.8056	12.3615	11.767	11.8354	11.9419	12.0638	11.8146	12.1027	11.9945	11.7733	11.7236	12.0767	11.9635	12.0776
11.3433	11.2592	10.7779	10.9446	11.2769	11.288	11.5481	10.9573	10.9268	9.34421	11.0259	10.9496	11.3396	11.081	11.1791	11.011	11.0555	10.8101	10.5115	10.6607	10.8949	10.0054	10.9292	11.0222	11.4713	11.2141	11.5733
3.96131	5.62485	6.84655	6.84655	9.43803	8.62761	7.01239	5.18575	4.61409	5.09626	5.58031	5.51647	8.33404	5.60602	4.5929	7.73073	7.87652	4.39772	6.33856	6.69833	6.38637	5.90619	6.45149	5.2651	6.28938	5.96336	5.31543
7.97253	8.56554	8.14333	7.6976	8.70525	8.14333	8.22812	9.84232	9.85464	8.92232	9.72591	8.35862	7.15851	9.75262	9.5322	9.67261	9.65193	8.87658	9.60349	8.48444	9.44289	9.74351	9.26209	9.91982	9.78074	9.40724	9.72617
8.62782	7.35924	7.58442	8.20984	9.809	9.64159	9.22855	8.7443	9.36717	10.0305	9.79276	9.24036	9.29858	8.39178	9.9506	9.08529	9.35629	8.76698	8.61359	8.24478	8.82038	9.35649	9.67431	9.89812	8.93669	8.93427	7.97394
13.3173	13.5543	12.4349	12.8322	13.5526	13.2709	13.3163	12.4707	12.5983	12.7439	12.8551	12.5957	13.0154	12.4153	12.0307	12.3923	12.3813	12.6437	12.631	12.046	12.5725	12.7151	12.872	12.9462	12.8907	12.6285	13.1513
8.58882	9.00935	8.25285	8.88168	9.70332	9.35637	9.86339	9.09903	9.58306	10.435	9.17458	10.1138	8.12734	9.88601	10.1347	8.93416	8.88857	8.50089	8.65995	7.92871	8.76375	8.68059	8.53726	9.3473	9.41296	9.10517	9.36275
7.07001	6.91471	6.32861	5.96184	7.72333	6.91471	6.91471	7.12808	7.52103	3.8928	6.98749	4.27421	3.04339	6.89204	6.28027	7.49085	7.73685	6.36212	5.08706	5.79516	5.57142	5.54232	6.85119	6.82522	6.66697	6.49904	7.39464
9.30005	9.3199	8.82047	8.93085	8.24273	8.41031	8.12681	9.64634	9.76039	7.80145	9.7437	9.15099	8.63608	9.57893	9.69582	9.76691	10.0143	10.2173	10.1224	10.023	9.45485	8.17426	9.02888	8.43257	9.11235	9.74597	8.31882
9.60459	9.53343	9.1711	10.1549	10.4501	10.3367	10.7511	10.6131	10.3839	8.53518	9.91198	10.4416	9.91625	10.8741	11.6076	9.86932	10.502	9.66825	10.1714	9.74266	9.85161	9.94112	10.4196	10.3303	10.1561	10.2181	10.6591
10.1913	9.91661	10.0984	10.2232	10.1635	10.5159	10.4885	11.5722	11.1627	11.2957	10.9387	11.5858	11.4505	11.4424	12.0713	10.9011	11.1066	10.4039	10.6304	10.7635	10.5581	11.1204	11.1472	11.0403	11.1445	10.9098	11.413
7.44546	7.95244	7.40895	7.71651	8.28028	7.93356	8.86286	6.24494	6.09641	8.02806	6.55368	5.73121	5.17568	5.7904	5.73121	5.73121	5.73121	6.04169	5.65332	5.50859	5.97715	6.43486	6.18506	6.06645	5.9592	5.54998	6.33937
9.20548	9.38686	9.70915	9.24163	10.3141	10.5365	10.2998	9.82032	9.95028	10.091	10.7972	9.81929	9.63371	10.0265	9.6431	9.78172	9.7119	8.94476	8.77454	7.39911	8.7697	9.04204	8.78836	9.67527	10.0335	9.98331	10.4616
12.0708	12.0878	12.1002	11.9915	11.5634	11.9915	11.8876	11.9162	12.187	12.1878	11.9968	12.1988	12.6043	11.9785	11.7149	12.2195	12.2386	12.0291	11.7009	12.5993	12.1771	11.8048	12.2343	12.0986	12.1602	11.9189	11.9409
9.60319	9.60693	10.1892	9.74331	8.94486	9.30256	9.15628	10.167	10.5775	6.68158	10.3924	9.23633	10.6719	9.92169	9.30544	9.94256	10.2691	10.7652	10.5943	11.3105	10.9118	10.7246	10.972	10.2928	9.64841	9.76067	9.55965
10.1682	10.631	10.6225	10.5684	11.3858	11.2243	11.52	11.469	11.5421	10.8161	11.3626	12.0513	10.9602	11.3144	11.0695	11.1365	10.8353	10.9852	10.6729	10.9172	11.1461	11.6191	11.3608	11.3288	11.2391	11.1668	11.3459
3.81636	4.971	3.49999	3.99106	4.00996	3.99106	3.99106	5.88977	5.61057	3.73776	5.06771	4.20507	3.93001	5.42226	4.55913	5.25256	4.90806	5.62555	5.62555	7.1674	5.66048	5.62555	5.62555	5.13822	6.41685	5.62555	6.38314
12.7326	12.93	12.6373	12.6959	13.148	12.9633	12.7213	12.5196	12.6926	12.5141	12.6079	12.5508	12.5511	12.436	12.9034	12.7192	12.668	11.4735	12.1075	12.0167	11.7674	12.0024	11.816	12.0061	12.7463	12.5384	12.3797
6.88671	6.9088	7.16906	6.88671	6.70368	6.88671	6.66318	7.12852	7.14697	5.89466	6.58753	6.58959	5.78932	6.72442	5.71216	6.57248	6.2983	7.38472	6.37839	7.61654	6.74223	6.74223	6.74223	6.44394	6.74223	6.55041	6.77894
9.95253	10.1914	9.92811	9.92454	11.1133	11.0553	10.9801	9.89202	10.3158	10.9839	10.3921	10.1714	10.1243	10.4657	10.5714	10.0878	10.427	10.1721	10.049	9.71579	9.95932	10.7068	10.4737	10.6387	10.5192	10.5043	10.5098
14.1103	14.4612	14.1399	14.022	14.2226	14.1573	14.1093	14.3587	14.4109	14.2928	14.4568	14.6721	14.8423	14.5397	14.4666	14.3863	14.3225	14.2771	14.2536	14.1167	14.1897	14.422	14.2103	14.3353	14.596	14.5065	14.6065
12.6806	12.476	13.0094	12.5369	11.0599	12.2419	11.9276	11.8239	12.163	10.2715	11.1714	11.7842	11.1346	11.3969	11.4645	11.349	11.4824	12.132	11.5263	11.867	11.8405	10.919	11.3983	11.5304	11.6087	12.0075	11.204
12.1449	11.9162	12.1599	11.8258	11.0852	11.3731	11.8014	11.5214	11.5743	10.7436	11.5051	11.7143	11.4008	11.5282	11.5417	11.3568	11.1084	11.2491	10.6791	10.51	10.7501	10.2246	10.0395	10.5876	11.4713	11.0619	10.9237
12.9462	12.684	13.0727	12.8149	11.6512	12.1989	12.3349	12.1472	12.0224	10.5618	11.8464	12.4306	11.9503	11.9747	11.9978	11.7757	12.0183	12.6069	11.9217	12.0914	12.2773	11.5143	11.569	12.1793	12.1332	12.0442	11.5506
12.0404	11.8408	12.1299	11.8562	11.4859	11.7747	11.6774	10.0511	10.3089	10.2037	10.6025	10.6999	10.4292	10.4999	10.45	10.5041	10.4729	10.8464	10.5027	10.7788	10.3217	10.5329	10.5396	10.3483	10.5013	10.3274	10.1388
9.85911	9.87405	9.86188	9.83962	10.0569	9.96426	9.87405	8.38962	8.41551	8.41551	8.21712	6.11761	3.8538	8.11469	7.6636	8.41551	9.19317	8.89427	8.77568	9.23724	9.08082	7.50278	9.2911	9.27947	9.33229	9.33612	9.29069
9.70172	9.7484	9.70172	9.70172	9.64934	9.70172	9.97705	11.5747	12.1519	12.0542	12.037	11.5915	11.7526	11.4511	10.6953	11.5359	11.8068	11.2353	11.0027	11.1559	11.5035	12.303	11.919	12.2032	12.0405	11.5017	12.0877
11.7015	11.4837	11.7752	11.7158	11.5924	11.7698	12.1982	11.7755	11.6006	11.2471	11.4056	11.9457	11.8664	11.7948	11.21	11.3226	11.2179	11.3619	11.1714	11.2899	11.0576	11.7545	11.3024	11.6601	11.593	11.7259	11.8722
9.56861	10.2758	9.63072	10.171	10.128	9.7664	9.81837	9.79774	9.68229	10.5248	10.0438	10.3812	9.06228	9.74248	10.4547	9.89894	9.86551	10.0216	9.87838	10.1937	10.3549	10.1411	10.1876	10.1737	9.8431	10.1287	10.17
9.0038	8.74145	9.66153	9.15548	10.3795	9.79946	10.3213	10.6386	10.3714	11.8459	10.1917	11.4416	10.2899	10.4528	10.0944	9.53658	9.63407	9.02094	9.08811	9.11539	9.2302	10.0082	9.40893	9.63216	9.73539	9.72157	10.0653
7.62579	8.13177	8.11621	8.44168	8.11621	8.13177	8.28036	7.17782	7.2305	8.62971	7.15193	7.12512	6.7771	7.54795	8.47018	8.17421	7.15193	6.57522	6.92676	6.22425	7.03972	7.82162	7.04968	7.03972	7.60313	6.93911	7.81249
9.6162	9.61716	10.2186	10.6148	8.71807	9.75402	9.75402	10.0389	10.1423	9.06333	10.6067	10.0592	10.0942	10.4686	10.4186	10.9279	10.4185	10.4625	9.89648	10.2176	10.915	8.89557	9.95086	9.71149	10.5016	9.93176	10.4744
9.64328	10.8248	10.7835	11.249	10.7457	10.727	10.74	7.90009	7.90009	8.77587	8.62656	7.30723	6.18833	7.94693	8.88934	8.74861	7.83529	6.33352	7.11596	6.89545	7.99959	6.69217	7.5466	7.75305	8.22116	7.84878	8.17854
8.63672	9.12144	8.41544	8.76496	9.34231	8.9742	9.16547	9.95787	10.0765	11.1323	10.6417	9.95247	8.1069	10.3155	10.2051	10.0185	9.84234	8.70382	8.97081	8.32604	8.81558	9.37025	9.1707	9.36591	9.71221	9.65485	9.97767
6.79078	6.94899	7.86788	7.4516	6.95817	7.2776	7.62044	8.38641	8.26687	7.66236	7.8631	8.27581	7.75953	8.20845	7.75953	7.6784	7.72272	8.67287	9.10489	8.48935	9.28889	9.34246	9.1764	8.99682	7.8187	7.69765	8.34073
9.6283	9.82365	10.2955	10.2609	9.40781	9.82365	9.7517	8.9523	8.4202	8.40367	8.10674	9.34695	8.56653	8.9608	8.40133	7.6538	8.10698	9.13995	9.29486	9.04298	9.25009	8.92941	8.95013	9.09269	8.11224	8.59916	8.57613
10.3223	10.5147	8.63435	11.3765	10.9089	10.516	10.1131	8.85275	8.89462	9.98666	10.0194	8.71608	9.78359	9.24318	8.11927	9.68299	9.84187	11.0601	10.4735	11.5715	11.1858	10.7788	11.7549	10.8459	9.54762	9.14634	9.56174
9.4278	9.75049	8.79048	9.10757	9.20333	9.12309	8.92273	9.95585	9.94454	9.69308	10.7224	10.4954	10.9815	10.3632	10.4034	10.1858	10.3556	10.2393	10.2086	9.83869	10.0123	10.0449	9.87424	9.70869	10.1557	10.1031	10.5573
11.3971	11.3002	11.1379	10.6755	9.22092	10.0423	9.77835	10.756	10.8438	10.9557	11.1607	11.1687	11.457	10.9267	11.3587	11.2147	11.2011	11.1153	10.6426	10.8896	10.7044	10.1794	10.2222	10.0531	10.6021	10.588	10.3878
11.6334	12.0619	11.471	12.0399	12.4965	12.5457	12.613	12.5115	12.7913	12.51	12.7442	12.3996	13.1413	12.5067	12.2523	12.9613	12.6724	12.2737	12.3033	11.5911	12.4417	12.6494	12.7768	13.1082	13.2163	12.9276	13.1392
13.2633	13.11	12.4932	13.2224	13.5232	13.5935	13.1562	13.7914	14.1571	13.4903	14.115	13.6982	14.3693	13.9547	14.3217	14.3029	14.3157	13.5667	13.7943	13.8872	13.3449	13.0033	13.8307	13.5397	14.3984	14.3555	13.6992
13.1357	12.8407	13.682	13.4639	11.9709	13.1357	12.9152	13.3518	13.4462	13.4994	13.2942	13.465	13.5063	13.3855	13.4231	13.8804	13.5438	13.1129	12.6972	13.3099	12.9119	13.0158	12.8971	12.7573	13.1579	13.3752	12.9334
7.64833	8.38161	8.22853	7.02673	7.83665	7.14436	7.64833	9.16211	8.93477	8.38203	9.25461	8.19935	7.27978	8.75779	7.23821	9.04235	9.41773	7.83568	7.09453	6.98218	8.57191	8.91808	8.57541	7.98262	8.38039	7.8088	8.65299
7.76384	8.05367	8.72748	8.25362	7.91456	8.04632	8.10277	5.96247	7.54101	6.91834	6.70707	5.1938	4.63168	6.52613	5.58087	6.46914	7.23219	6.9768	6.20526	6.76507	6.84185	7.2408	6.68754	6.48697	6.12368	7.35486	5.01952
8.77882	8.61111	8.06114	8.43965	9.256	8.92151	8.61111	9.15971	9.82118	10.1133	10.1204	9.69645	10.5844	9.65358	10.0345	10.1147	10.8219	9.1154	8.92599	8.11581	8.27898	8.43022	8.29187	9.32877	9.75891	10.6817	9.71195
11.3289	11.4728	11.3289	11.3289	11.2741	11.0027	11.3289	12.0613	12.1474	11.057	12.1286	12.126	12.7132	12.2174	11.8675	12.2075	12.3493	11.996	11.243	11.113	11.3503	11.2641	10.3833	11.373	11.645	11.95	12.0041
12.775	13.0676	12.8935	12.6073	12.6631	12.7615	12.6459	10.681	11.5642	12.2302	11.7856	11.929	11.9907	11.6263	10.8884	11.3092	11.4637	11.414	11.417	11.4102	11.2756	11.2578	11.2016	11.3898	11.5426	11.3917	11.403
9.62732	9.7381	9.5931	9.84024	10.3942	10.0483	10.3245	9.14216	9.30924	9.97888	9.50617	9.70213	10.1603	9.94075	9.52761	9.58507	9.62973	9.85279	9.69046	9.67261	9.84823	10.0986	10.15	10.0489	9.85347	9.76168	10.2147
9.78366	9.78441	10.8183	10.165	7.52072	9.38531	9.28246	9.88633	9.8279	7.45292	10.0805	9.45501	9.97614	9.18127	8.38997	9.4619	9.46047	10.9645	10.1789	10.1093	10.7017	8.84548	9.98203	9.99415	9.44732	8.9282	9.48471
9.25436	9.19774	10.1175	9.33762	8.11216	9.19774	8.58966	8.71368	8.46663	8.8145	9.21408	9.0319	9.01378	8.44812	8.53118	8.46663	8.73288	9.52212	8.55366	8.44713	9.21926	7.99728	8.47338	8.55577	8.87318	8.59653	8.59671
12.6689	12.7089	13.0167	12.6806	11.5695	12.4206	12.2037	11.6074	11.5724	11.9999	12.0553	11.8291	11.8461	11.3059	11.2853	11.4659	11.3452	12.6414	11.7132	12.0406	12.4891	11.3036	11.5889	11.6539	11.5197	11.5951	11.2804
12.4476	11.6486	12.1155	12.5344	12.0104	12.1268	11.4384	11.8927	12.5219	12.073	12.4382	12.3081	13.1077	12.4306	12.8737	13.3761	13.6048	13.2294	13.0476	13.2301	12.492	12.4829	12.7111	12.7814	12.7103	12.9853	12.1277
6.63424	6.55239	6.4252	6.77309	7.29153	6.77309	7.32592	7.17184	7.19327	7.24804	6.86734	7.78669	7.24759	6.19456	5.95629	6.77735	6.40501	7.00611	6.87276	6.6064	6.88747	8.00098	7.00611	7.00611	7.00611	7.08107	7.01319
7.74236	8.04957	7.13079	7.55281	8.49435	8.14524	8.30936	7.71466	8.10641	7.93411	8.81042	7.71963	6.7171	8.72503	9.03243	8.51385	8.73045	7.54436	8.10749	8.17838	8.33543	8.57725	8.06594	8.44929	8.36815	8.0495	8.1823
11.6385	11.9715	11.8383	11.5334	13.2604	13.0005	12.9811	12.5152	12.4759	13.1368	12.364	13.2278	12.2307	12.0649	12.2501	12.0014	11.9482	11.8446	12.11	11.5561	11.8617	12.819	12.6315	12.7757	12.5842	12.6518	12.6538
4.3387	4.27384	3.77664	4.27384	4.2977	4.27384	4.27384	2.32111	2.32111	2.48065	2.32111	2.32111	2.32111	2.32111	2.32111	2.32111	2.32111	3.4411	2.33987	2.39136	1.94841	1.86524	2.29075	2.03017	2.09138	2.90953	3.12202
12.3152	12.2453	12.3467	12.0099	12.0147	12.0967	12.0742	13.1775	13.1711	13.2824	13.088	13.2991	13.4913	13.0606	12.9738	13.1677	13.1614	12.863	13.2317	13.033	13.0321	13.1642	13.0889	13.1601	13.2665	13.4122	13.2435
8.79101	8.77008	8.70113	8.81552	8.37554	8.25846	8.88482	10.6127	10.7649	8.80998	10.7459	10.4005	11.1798	10.7013	9.9571	10.6977	10.8168	11.0757	10.5154	11.0435	10.94	9.50234	10.5936	10.6923	10.8662	10.2974	10.8024
7.5	6.34498	7.72547	7.98152	6.23935	6.84377	7.46497	8.89349	10.3622	5.89117	10.0955	7.46401	9.33775	9.60564	9.84739	8.84436	9.32517	9.99669	9.18349	9.35386	9.63531	9.34306	7.26109	9.34306	8.64766	6.50022	6.63461
7.72617	6.70554	7.05824	6.99022	5.07325	6.3405	6.52381	7.48789	7.85684	5.66741	7.48375	7.69173	8.75813	7.9995	8.1249	7.67725	8.09337	8.8755	7.72573	8.78247	7.84963	7.97984	7.96744	7.62343	7.48958	7.33823	7.52199
8.18702	7.85183	7.80371	7.88002	6.05995	7.68096	6.68826	8.43343	8.42439	7.76945	7.99134	8.50247	9.08713	8.63121	9.20813	8.04623	8.5603	8.28129	8.68806	8.29314	8.61317	6.97718	8.21028	8.53227	8.85101	7.67933	8.64443
9.18536	8.58179	9.64922	9.56567	7.17399	8.20231	8.01497	10.2192	9.96992	9.84673	9.36949	10.1626	10.1932	10.3264	10.8367	9.7411	10.169	10.1735	9.50074	10.5612	10.3448	9.24475	9.80695	9.60612	8.22411	9.41555	9.63152
10.7403	10.5645	10.7304	10.5418	9.3363	10.0344	9.68106	8.72279	8.55653	9.30259	8.33317	9.10107	9.61065	9.28889	9.89832	8.9748	8.63972	8.89426	8.76304	8.96677	8.46207	8.67253	8.45756	8.26369	8.84643	8.92939	8.50223
9.12513	9.12513	9.89113	9.52055	7.35318	8.68396	8.29352	9.65219	9.79239	8.61274	9.00984	9.45523	9.96292	9.63576	9.90641	9.12147	9.62826	9.69963	9.19875	9.97065	9.78487	9.85031	9.74049	9.28174	8.74396	9.15259	8.98717
8.25187	8.25187	8.36733	8.25187	8.04918	8.25187	8.25323	4.14204	3.87087	4.28157	3.87087	3.87087	4.15869	3.87087	4.14204	4.14204	4.14204	4.89928	3.95253	4.27157	4.42307	3.08551	4.17395	3.95969	4.35802	4.29478	4.29631
2.05099	2.05099	2.05099	2.05099	2.05099	2.05099	2.05099	2.28089	2.69556	2.05372	2.35768	2.01586	2.05372	2.18157	2.05372	2.17653	2.1262	2.37073	2.37073	2.35754	2.37073	2.37073	2.37073	2.29422	2.2928	2.37073	2.37073
11.7809	11.7809	12.056	11.9272	11.5584	11.5624	11.6273	11.7098	11.719	11.3998	11.5019	12.0636	12.063	11.6684	11.4344	11.4737	11.5889	11.7999	11.343	11.6485	11.6936	11.1543	11.3724	11.4987	11.3822	11.1921	11.2539
10.4877	10.919	10.0185	9.71153	11.2049	10.4557	10.3331	9.18359	9.16812	8.07401	9.03919	8.66978	8.66746	9.09383	8.66978	9.06998	9.24666	9.27016	9.36846	8.65519	9.06662	9.53437	9.30737	9.35516	9.84856	9.45156	9.8216
11.5193	11.574	11.6061	11.6039	11.0623	11.3989	11.281	11.2456	11.435	10.4907	11.4729	11.5757	12.0705	11.5839	11.452	11.4783	11.3508	11.6683	11.1782	11.5126	11.7436	10.9655	11.415	11.5219	11.7395	11.6412	11.7403
10.5597	10.9698	10.2758	10.1441	9.22642	9.2872	9.31232	9.61621	9.86565	7.46129	9.2663	9.32352	10.089	9.9433	9.61108	9.63388	9.64485	10.1988	9.82268	10.3957	9.95071	8.73793	9.31833	8.83661	9.46328	9.69045	9.42471
8.84861	8.75582	8.53644	8.35265	8.85701	8.92488	9.1486	9.47547	9.78331	8.56127	9.56388	9.41924	9.91066	9.75561	8.75783	9.70987	9.8121	10.1074	9.79248	9.78928	9.68718	10.5593	9.73305	10.1704	9.4075	9.528	9.86876
12.2249	12.2379	12.365	12.1385	11.7492	11.8418	11.9485	11.1409	11.5626	11.3979	11.2046	11.6659	11.7431	11.1579	11.0447	11.2879	11.1965	11.4209	11.3153	11.6449	11.2556	11.2048	11.132	11.2387	11.2289	11.4609	11.2114
8.42085	8.78784	8.17543	8.55998	10.4389	9.72655	9.7093	9.62272	9.66673	10.8861	10.4388	10.6101	9.69166	9.42033	9.91294	9.42033	9.42033	9.38251	9.18841	8.79288	9.57363	10.2206	9.5099	10.2415	10.1094	9.94461	10.0454
11.8186	12.4627	11.9502	12.4589	12.341	12.2467	11.8351	10.0264	10.2129	10.6783	11.112	9.57778	8.93447	10.0766	9.57778	10.111	9.92434	10.2238	10.6269	10.6613	10.4829	10.3521	10.3126	10.3162	10.1242	10.2913	10.2119
2.2842	2.34354	2.07149	2.51364	2.2842	2.2842	2.16184	2.6613	3.06683	1.97176	2.55157	1.86306	1.83509	2.86901	1.90821	2.80502	2.71998	2.85598	2.85598	2.85598	2.85598	2.85598	2.85598	2.85598	2.85598	2.85598	2.85598
8.42304	7.48609	7.75547	8.76624	8.51673	8.49948	8.46505	7.05674	6.83328	7.4121	7.7603	6.95276	7.74066	7.4121	8.51013	8.32743	9.05152	7.94593	8.04531	7.60907	7.87478	7.66725	7.75927	7.97901	8.35494	8.35283	7.82691
10.6944	10.6867	11.0574	10.7602	12.0121	11.7939	12.0798	12.6647	12.2742	11.993	11.9961	13.2086	12.2279	12.1936	11.6093	11.7127	11.7988	11.5979	11.5948	11.2857	11.6622	12.6824	12.3972	12.5094	12.0765	12.1717	11.6017
9.26285	9.26285	9.52531	9.31609	9.26285	9.26285	9.25999	10.6298	11.0986	10.8474	11.2703	10.6577	11.117	11.056	10.6988	10.8473	11.365	10.8943	10.881	10.881	10.881	10.881	10.881	10.881	10.881	10.881	10.881
7.30513	7.02431	7.22262	7.72384	8.93232	8.26063	8.55494	6.77772	8.71614	7.12015	8.25195	6.09601	6.09601	7.35306	6.77772	7.53666	8.23646	6.89708	5.83086	6.81537	7.12252	7.3337	7.17207	6.94985	7.01825	7.47428	7.27453
9.10303	8.34398	9.65442	9.20289	8.0279	8.95985	8.95985	8.21428	8.79147	10.1237	9.53936	8.73317	10.5502	9.437	7.89093	9.04575	9.40162	9.89442	8.75905	10.1754	9.81773	6.7436	9.17657	7.72912	7.48079	9.4984	7.47661
3.1222	5.73864	5.73606	5.70793	5.94696	5.79761	6.443	2.73146	2.85843	2.59	2.88642	2.59	3.87257	2.59	2.59	2.59	2.59	3.68772	3.62095	2.14879	3.86213	3.93447	2.3159	3.29656	1.80507	1.83817	1.74529
7.89307	8.98936	9.99467	9.70429	9.70429	10.2388	9.95466	8.08527	8.48539	7.80302	7.51655	8.21736	8.62751	6.92244	6.96362	8.07707	6.99394	8.09335	7.37391	6.85628	7.64013	7.61961	6.85831	7.7291	6.61393	6.26582	5.78678
6.68759	6.97879	6.83359	7.11728	7.31337	6.50879	7.26388	7.32025	7.34801	5.54326	6.89677	4.90693	4.25543	6.95592	5.59485	7.01564	7.05544	6.90416	6.84267	7.50852	8.51213	7.53182	7.64214	7.52723	6.83745	8.08502	6.91432
10.8285	10.6003	10.3146	10.7615	11.5014	11.4763	11.1084	9.96167	10.2151	11.0257	10.4541	10.4174	10.334	9.9503	10.4978	10.462	10.1209	11.1031	10.549	10.5714	11.0529	11.0048	11.2251	10.9406	10.2901	10.3576	10.2426
9.161	9.161	9.00817	9.161	9.161	9.161	9.2605	10.2125	10.4882	10.1718	10.655	10.2644	10.2571	10.1889	10.1883	10.6268	10.578	9.56313	9.37547	9.82316	9.52894	9.83127	9.52129	9.82348	9.58272	9.58899	9.19002
12.0422	11.9527	12.2433	11.9131	11.365	11.9038	11.7889	10.6585	10.8731	10.9905	10.7519	11.158	11.4191	10.8039	10.4423	10.7444	10.8146	11.4739	11.3057	11.1542	11.1994	10.813	10.9435	11.0194	11.1071	11.1873	10.9225
10.3943	10.6832	10.5778	10.8595	10.3973	10.4271	10.5719	8.43522	8.74482	8.11048	9.24389	7.63546	5.86358	8.73518	7.36094	8.6905	8.76592	7.20699	8.83085	10.2325	9.66678	9.17378	9.31573	9.32635	9.07006	6.8594	8.90264
3.6207	3.6207	3.61355	3.61355	3.6207	3.90714	4.34907	8.87574	7.77072	8.60558	8.118	8.181	6.41784	7.63332	8.62784	6.72629	7.62364	6.43784	6.97242	4.86919	7.75311	7.75311	7.36264	7.75311	7.75311	7.13236	7.75311
8.77985	8.86524	8.803	9.32968	9.93933	9.63027	9.47244	9.2379	9.17803	9.55795	9.45042	9.46578	9.59152	9.59566	9.35677	8.79743	9.48897	9.52868	10.1611	9.87948	9.96898	10.4765	10.4326	10.3827	9.47466	9.79156	9.78101
7.72779	7.8978	7.39104	6.86184	7.89572	7.39104	7.27649	7.19861	7.58715	1.95023	7.4819	5.81318	7.04494	7.27592	5.23863	7.08618	7.12024	7.27745	6.61167	6.10455	7.54778	5.555	7.02253	7.45441	8.61078	8.43612	7.68368
10.307	10.4927	10.3901	10.2165	10.5864	10.368	10.4272	11.0684	11.4748	10.5685	11.3281	11.6829	11.288	11.5997	11.1729	10.993	11.1943	11.2965	10.528	10.8995	11.1497	11.4072	10.7181	11.3609	11.6861	11.699	11.4261
9.16284	9.13039	8.52725	8.57235	8.55572	8.31419	8.41792	9.73779	9.41523	8.07661	10.0588	9.71907	10.2956	9.81702	9.37837	9.43832	9.62126	10.0369	9.5543	9.65882	9.86985	9.72072	9.19916	9.53785	9.68372	9.33489	9.88216
9.49529	9.8138	9.30919	9.37388	9.29824	8.93333	8.86557	10.3032	10.0798	9.91659	10.511	10.645	10.8751	10.6257	10.4084	10.1745	10.1116	10.5155	10.3063	10.4124	10.3803	10.9153	9.82377	10.1235	10.4183	10.2684	10.5347
7.99085	8.44309	7.7245	8.26478	8.96931	8.24006	8.36993	9.66289	9.28223	10.1568	9.78776	9.44947	9.27714	9.74117	9.32293	9.36684	9.45956	8.80294	8.92905	9.02471	9.06456	10.1298	9.37964	8.97744	9.54436	9.25141	9.40367
9.80848	9.88278	9.3871	9.36735	10.6763	9.74067	10.1493	10.3489	10.8525	9.82488	11.0826	9.54545	3.96353	10.2173	10.5254	9.96379	9.72659	7.83488	8.05543	7.27147	9.23059	9.63762	8.79242	9.13555	10.1054	9.59413	9.37258
9.71965	10.15	10.1424	10.6986	10.286	10.137	10.2113	9.6186	10.0268	10.1379	9.94707	9.19726	8.76106	9.88326	9.25215	9.97175	9.87534	10.1957	10.3838	9.71808	10.4805	11.0776	10.3249	10.1829	9.04934	9.81068	9.57738
10.6089	10.516	10.4585	10.5386	10.7882	10.5939	11.0175	9.27884	10.1185	10.3258	10.4499	9.69944	10.4985	10.0809	9.96808	10.2404	10.353	10.4244	10.2622	10.4411	10.5986	10.6996	10.6752	10.7074	10.5445	10.3918	10.5239
9.56339	9.57806	9.4894	9.55136	9.93841	10.1195	9.57806	8.28582	8.55393	8.6287	9.26577	9.08472	9.47219	9.04415	8.6295	8.73368	8.90891	8.64136	8.71904	8.52585	8.41151	8.87948	9.19567	8.79175	8.73405	8.75835	9.01059
7.9964	8.79143	8.28288	8.74204	7.14005	7.96728	7.85286	9.40027	9.87135	7.79557	9.83702	9.58129	10.443	9.63456	9.38607	9.28262	9.38607	9.80002	8.95871	9.70999	9.48062	7.59779	9.24473	9.07749	9.5653	9.82884	9.87981
10.0145	10.3506	10.5915	10.1173	8.85084	9.91704	9.50908	10.9877	11.1954	10.7847	10.7945	11.1223	11.3735	10.9946	10.9408	10.7732	10.745	10.9936	10.7911	10.6701	10.6618	10.6771	10.4315	10.5917	10.7922	10.9893	10.3274
8.11899	8.39194	9.19034	10.1215	7.49474	8.87854	8.60986	9.3215	9.86326	8.75518	10.2745	10.2679	9.91855	10.2602	10.1937	10.4641	9.42556	11.6654	10.5046	11.6563	11.4285	10.8553	10.9981	10.1441	8.64053	9.20274	8.8039
9.83509	9.82362	10.0734	10.1064	9.73214	9.64256	9.89018	9.76155	9.89844	8.12395	9.8508	8.95744	9.64931	10.0061	9.74528	10.0608	10.0345	9.7556	9.93006	10.465	10.3259	10.1098	10.2034	9.70092	10.6598	10.3775	10.2105
10.3436	10.1943	11.0837	10.5059	11.102	11.1838	11.5539	10.9515	10.8106	10.4657	10.2883	11.2049	10.499	10.4229	8.89409	9.38343	9.77876	11.6549	11.1658	10.3898	11.0513	12.0896	12.2562	11.7445	10.1012	9.78103	10.8106
7.99674	8.13896	9.19172	8.99392	9.07386	9.12906	9.95634	8.69413	8.85892	3.63044	7.88612	8.2236	5.35888	8.10049	4.48569	7.03064	7.33506	9.93127	8.58007	8.10062	9.09384	8.14686	10.6146	9.83865	7.64861	7.08308	9.00223
9.76797	9.12001	9.26849	9.78025	10.7609	10.1626	10.7893	10.1263	10.1215	9.60605	9.73474	9.82149	10.2671	10.4149	9.29244	10.0507	10.5973	9.76669	9.97071	9.94117	10.0926	10.4937	10.3891	10.4149	9.94346	10.2708	10.2418
14.9306	14.9564	15.0512	14.9605	14.8719	14.9564	14.9248	15.2399	15.1441	15.2587	15.1039	15.1409	15.0472	15.2171	15.162	15.1949	15.2161	14.9736	15.0033	15.088	15.028	15.0771	15.0532	15.0778	15.0859	15.0812	15.1304
12.4941	12.4452	12.3695	12.4176	11.6904	11.866	11.9755	11.582	11.6273	10.7006	11.733	11.3509	12.1406	11.9332	11.7208	11.7603	11.9985	11.7625	11.5271	11.78	11.636	11.3001	11.5289	11.6532	11.8219	11.682	11.6839
12.2422	12.0863	11.5823	11.9968	11.9691	12.1322	11.7969	10.4573	11.1551	11.2205	11.4176	10.5327	11.7398	11.344	11.3233	11.8065	11.7464	11.8117	11.7641	11.6505	11.7047	11.5987	11.8213	11.3432	11.5382	11.484	11.2726
3.95042	3.90785	3.91994	3.75947	5.56317	4.10282	4.19607	3.34809	2.65925	2.13713	4.91959	2.13713	2.13713	2.13713	3.00821	2.13713	2.13713	1.98525	1.98525	1.98525	1.98525	1.98525	2.32952	2.54283	3.10858	2.36442	2.39761
8.46433	6.90677	8.46433	7.33048	9.52746	8.64921	8.46433	10.3366	9.81439	7.81335	11.2694	9.96581	9.23818	9.59607	10.8415	7.71465	8.64691	6.49626	4.59082	5.63357	6.7264	5.67541	8.54242	9.3681	9.44991	9.45504	7.60778
11.2104	9.57394	11.6615	10.6762	11.434	11.4522	10.9403	12.3874	12.0791	11.8382	12.7743	12.1623	12.4067	11.836	12.7887	10.6229	11.3822	10.0091	8.53797	8.98597	10.0749	9.03685	11.2854	11.9904	12.2554	12.6045	10.9522
11.6205	11.7776	11.1811	10.8816	11.3717	11.2454	11.2223	10.3499	10.3427	9.71286	10.3528	10.1365	10.5073	10.646	10.5579	10.5129	10.5198	10.1955	10.1497	9.95406	9.86929	9.72159	9.90562	10.1497	10.6051	10.5072	10.8622
11.3977	11.626	11.0166	11.2843	11.3818	11.2532	11.3959	11.0578	10.8555	10.3448	11.2437	10.5661	10.6673	11.2641	10.9802	11.1738	11.3253	11.1904	11.2404	11.0182	10.9955	11.5817	10.9959	11.3201	11.5498	11.0613	11.3185
9.72599	9.95155	9.64447	9.3759	9.15574	9.08308	8.82722	9.85092	10.2082	10.9039	11.2478	10.4362	11.1946	10.8633	10.7866	10.8485	11.0228	10.5729	11.0983	10.8994	10.8354	9.24881	9.99873	10.002	10.3945	10.405	10.4181
11.912	11.7746	12.2381	11.8396	11.2051	11.7546	11.69	10.5771	10.512	11.2048	10.5312	11.471	11.0814	10.7629	10.6402	10.8022	10.7452	11.0334	10.8446	10.9528	11.1917	10.645	11.0398	10.9547	11.0098	11.1043	10.9692
11.1982	10.3919	9.33686	9.86905	11.1063	10.1667	10.7781	10.8497	10.8134	9.59928	11.4211	10.4909	11.067	11.7862	11.8126	11.2531	12.0893	11.1614	11.1034	11.4467	10.9061	11.194	11.0377	10.9983	11.0332	11.2771	11.1544
12.1639	11.5365	11.8749	12.0642	11.1258	11.0673	11.1815	11.1399	10.8441	10.651	11.3279	11.083	11.5753	11.0428	10.8738	11.1843	11.4748	12.3248	11.5415	12.4683	11.6769	11.4482	11.3171	11.0883	10.6962	11.1714	11.1091
7.24853	7.5264	7.24853	7.24853	6.49273	7.45261	7.21169	7.64868	8.03356	4.93847	8.66799	6.89591	8.10641	7.72596	7.08211	7.70278	7.81547	8.55498	7.46129	7.3617	7.68802	9.40862	8.30537	7.54222	7.74358	7.47844	8.21559
10.3628	9.63282	10.4432	10.2036	10.1491	10.4065	10.4057	11.6834	11.2574	11.2577	11.248	12.3198	11.7177	11.705	11.9533	11.5988	11.1796	11.0961	11.5137	10.4666	10.675	11.0118	10.79	10.8105	11.2431	10.4782	11.736
13.3503	13.1684	11.2934	11.9008	13.536	13.1437	12.8644	12.574	13.0536	12.8505	13.6604	12.1312	13.0224	13.3226	13.5914	13.5589	13.585	12.3854	12.6987	12.0341	12.4181	12.9223	12.5738	12.3427	13.1267	12.9472	13.2497
10.1153	10.0813	9.58432	10.7608	11.299	11.4615	10.8158	11.0246	11.153	10.015	11.0695	10.6159	10.1721	10.4738	10.1782	11.2559	10.9428	11.2462	12.511	10.7595	10.6516	11.7217	11.2455	11.5741	10.6876	10.518	10.6117
11.988	12.651	12.2513	11.7531	12.1073	11.9141	12.1762	10.4493	10.4642	11.0493	10.1211	11.0328	10.5883	10.1534	10.2333	9.74779	9.77051	9.86225	10.4189	9.97107	10.1702	10.6213	9.96308	10.3696	10.2192	10.1395	10.3114
6.77611	7.39648	6.32108	5.28176	7.34891	6.52481	6.72068	2.33448	2.33448	2.33448	2.33448	2.33448	2.08764	2.33448	2.93907	2.33448	2.33448	2.1911	2.13553	2.20041	2.26762	3.14238	2.05143	2.99378	2.34384	3.88184	2.1911
7.46091	7.67038	7.10911	7.43075	8.6576	7.6711	8.32575	9.58927	9.75497	8.94686	10.1074	8.23256	7.4135	9.22652	8.59041	9.00349	8.96261	7.97334	8.11093	7.47068	8.81	9.89928	8.77325	8.68226	8.72038	8.83963	9.20707
8.18311	8.7007	9.01372	8.59341	8.78917	8.46832	8.94438	8.94015	9.08373	7.96575	8.80398	8.84194	8.87432	8.78756	7.42281	8.41982	8.8379	8.7967	8.30602	8.4725	8.46984	10.0314	8.0811	8.51951	8.32207	8.55267	8.71109
11.1276	11.2173	11.1582	10.6624	10.5243	10.8806	10.8143	9.07097	8.8932	9.67271	9.6446	9.14869	9.7438	9.25262	9.67996	9.39119	9.35746	9.29754	9.14811	8.89391	8.82619	8.76137	8.30683	8.88473	9.16211	9.29453	9.345
8.65122	9.41685	8.92091	8.72643	8.97621	8.91866	8.42111	8.64931	8.32117	6.87876	8.64931	7.96207	8.8639	8.57678	7.83398	8.56541	8.5409	9.18505	9.14463	10.0028	8.96689	8.88019	9.59821	9.09297	9.07009	10.1479	9.15641
11.6904	11.6372	11.5542	11.6124	11.612	11.6372	11.6372	11.1561	11.1107	10.5029	11.215	11.2527	11.6525	11.2167	11.0483	11.2008	11.2549	11.1073	11.0254	10.6146	10.895	10.8241	10.7422	10.8064	10.9353	11.219	11.0923
5.33181	6.36346	6.27806	6.25198	8.18088	7.61878	7.48928	8.65494	8.14919	8.80064	8.26051	8.84395	7.40668	7.57305	7.7073	7.40487	8.02454	7.67633	8.04207	7.51707	7.88895	9.0971	8.52196	8.80436	7.79057	7.60059	8.30877
12.031	12.1371	12.1664	12.2889	11.1307	11.889	11.5898	10.053	9.69278	9.79764	10.1312	9.98393	10.7142	10.0153	10.3669	10.0276	9.85058	10.198	9.61346	10.1494	10.1216	9.78818	9.79443	9.74997	9.83124	9.97689	9.69551
10.9642	10.7883	11.0219	11.068	10.9064	11.1294	11.1167	10.4728	10.5929	10.1483	10.7498	10.9918	10.9591	10.8398	10.9261	10.5773	10.8392	10.2579	10.2388	10.0692	10.7464	9.77313	10.3427	10.2874	9.93628	10.8336	10.4062
11.6241	11.7447	12.0052	11.6296	11.1587	11.48	11.4601	10.6623	10.6152	10.6209	10.5535	11.0559	11.0016	10.7145	10.3112	10.6232	10.4256	10.816	10.6921	10.7843	10.7133	10.622	10.4881	10.7996	10.7969	10.2891	10.5929
10.5628	11.1487	10.8768	10.7676	10.9665	10.7211	11.0781	10.4038	10.7382	9.36178	10.5976	10.8489	10.7703	10.547	9.99772	10.345	10.2275	10.5084	10.7414	10.7276	10.7078	10.9219	10.6188	10.6474	10.3699	10.4564	10.4665
6.10443	6.4131	6.4131	6.90259	6.43442	6.28826	6.00855	6.41175	6.315	4.55386	6.58801	5.27288	6.93665	6.42875	5.83209	5.85919	6.15273	7.16321	5.88737	6.67797	6.60289	6.79644	7.91467	6.73195	5.72918	6.09998	6.18392
8.72279	8.3947	8.34709	8.70809	9.47275	9.15505	9.23214	9.26178	9.20622	9.3708	9.55452	8.98658	9.6032	9.39647	9.83636	9.40187	9.54615	7.76414	9.1189	9.44095	7.90681	9.33848	9.03963	9.26408	8.9018	9.37154	9.5837
8.16629	8.19031	8.19031	8.16629	8.19031	8.19879	8.21264	7.97886	7.91451	5.31821	8.15569	7.58321	7.54478	7.96572	7.17654	7.97662	7.93192	9.51778	9.0116	8.98276	9.25499	8.79273	9.20217	8.21777	7.63383	7.6719	7.86683
11.1103	11.1007	11.2508	11.0164	10.9323	11.0164	10.8118	11.1221	11.0455	10.5413	11.2583	10.962	11.1516	11.1205	10.3693	11.0683	11.191	11.5696	11.2226	11.3614	12.0725	11.8154	11.7726	11.5447	11.0383	10.9953	11.5038
13.7823	13.0961	13.9607	13.9707	14.0075	14.3412	14.0341	13.2884	13.8245	13.0784	13.8893	13.3427	13.5448	11.9666	12.9328	12.9482	12.5534	11.4354	11.1711	12.2344	11.4992	12.0538	11.9523	13.5931	12.768	12.6591	12.4561
10.4175	10.7587	10.4963	10.2489	10.5767	10.1829	10.5422	10.9284	10.7206	10.6979	10.732	10.0702	8.29592	10.0721	9.52508	10.1722	10.2271	10.3875	9.85514	9.84315	9.87563	10.2083	10.068	9.78224	10.3901	10.4546	10.4058
9.02583	9.24211	8.86761	8.99814	9.66356	9.02583	9.19033	10.518	10.3224	10.9355	10.6281	9.97314	9.29882	10.7173	10.4357	10.704	10.9469	10.6951	10.5761	10.3896	10.8339	10.8357	11.0303	10.7473	10.1615	10.379	10.453
10.2355	10.3297	10.0428	10.1662	10.1662	9.99401	10.1248	10.8245	10.96	10.2187	11.54	11.1828	11.4154	11.2086	10.8611	11.2052	11.3022	10.7519	10.6646	10.9196	10.7782	11.1684	9.91591	10.3758	11.0882	11.0419	10.7698
8.38715	8.60916	7.72227	8.1234	8.62899	8.32111	8.32111	9.31363	9.72534	7.27843	10.0144	9.08313	8.91103	9.88114	8.88155	9.69864	9.8403	9.29416	8.40683	9.65965	8.85516	9.45524	8.45558	8.45813	9.66259	9.60278	10.0549
11.6681	11.6681	11.5173	11.5945	11.7632	11.525	11.954	12.6379	12.5656	12.192	12.5555	12.1951	11.3144	12.5578	12.2175	12.4649	12.455	12.7781	12.6278	12.2903	13.0262	13.0475	12.6238	12.7294	12.3825	12.2775	12.5477
9.86261	8.78923	8.76431	9.19371	8.4249	8.45131	8.78923	8.95619	9.05478	9.14831	9.29925	9.48678	10.7292	9.42044	9.2674	9.4125	10.195	10.555	9.97116	11.3863	9.9915	9.78596	9.62577	8.90711	9.13314	9.74314	8.77261
11.0737	11.0504	11.2563	11.2814	11.2856	11.3327	11.5153	11.6646	11.4974	10.6312	11.3246	11.822	11.5721	11.3809	11.2975	11.2104	11.0948	12.0013	11.7299	11.7466	12.0085	11.5213	12.0243	11.7866	11.3075	11.1019	11.5219
12.3104	12.3534	12.6852	12.4553	11.4078	12.3104	11.4965	12.3676	12.4888	10.3192	12.563	12.3605	12.1752	12.3556	11.7025	11.6617	11.7654	12.6729	12.3294	12.5142	12.4669	11.62	11.9215	11.6482	12.0201	12.9358	11.8579
11.9132	12.1441	10.3769	10.9599	10.9316	10.6618	10.3984	10.5952	11.4705	11.0356	11.3621	10.861	12.3764	11.1487	10.5267	11.7437	11.779	12.2263	11.7091	10.8076	11.1963	11.0213	10.9911	11.1162	11.3875	11.4837	11.4404
10.9819	11.1229	10.0234	10.4318	10.2978	10.4318	9.95296	9.71131	9.96435	10.0629	10.0102	9.71869	10.6552	10.04	9.73198	10.4198	10.4348	9.95791	9.71381	9.16622	9.75824	9.53264	9.25929	9.64111	10.5245	10.6406	10.5288
7.40954	7.33751	6.70583	7.28213	8.1352	7.89374	7.61667	8.83633	8.95175	8.78908	9.94632	8.56539	9.27803	9.32964	9.76979	9.30761	9.76059	8.44654	9.07359	8.66615	8.43122	9.06131	9.14263	9.278	9.7628	9.61594	10.0146
10.1835	10.3941	10.2743	10.6225	10.5925	9.89095	9.53653	5.88921	5.9484	5.80778	7.36451	4.71741	5.88921	5.88921	4.23618	5.88921	6.37253	7.28584	7.44361	7.95598	7.53025	6.75075	7.11749	6.60132	6.41739	6.59697	5.74113
2.10519	2.10519	2.05099	2.10519	2.10519	2.10519	2.10519	1.9156	3.38151	1.9156	2.22937	1.89143	1.89143	1.9156	1.89143	1.94859	1.91766	2.88441	2.88441	2.88441	2.88441	2.82868	2.90948	2.82469	2.93861	2.88441	2.88441
5.12581	2.77715	3.04115	6.13017	6.84953	6.821	4.61345	8.1331	9.60516	4.64159	9.54552	6.69744	8.0765	8.24591	9.76622	9.80313	9.97663	7.50773	11.6028	6.91395	7.27786	5.04037	8.67432	8.46806	8.82092	9.14051	7.90183
12.5337	12.2554	12.554	13.0291	12.5001	13.021	12.0285	12.474	12.8849	13.147	12.8785	12.3959	13.4552	12.5225	13.3126	13.174	13.2596	12.5197	13.8378	12.4439	12.5991	10.7454	12.576	12.351	12.8312	13.1956	12.2011
10.3575	10.1931	10.1886	9.95935	11.7009	11.7453	11.7373	9.89078	9.71239	10.3716	9.94519	10.0494	8.47349	9.46282	9.82015	9.84576	9.90194	9.21253	9.1204	9.01757	9.21995	9.927	9.99793	10.1235	10.0554	9.96149	9.60873
13.2207	13.026	13.0797	13.1043	12.3997	13.0006	12.721	11.5229	11.2861	11.4548	11.9749	11.6922	12.0814	12.0327	12.1428	11.7519	12.1715	12.1682	11.6865	12.1139	11.7179	11.3242	11.8309	11.6972	11.967	11.9438	11.631
9.09851	9.30865	9.42539	9.24746	10.3442	9.91593	10.0429	7.5237	7.40006	7.17151	7.4979	7.42975	8.01963	7.82692	8.05075	7.36572	7.96134	8.31893	8.32009	8.29017	8.62082	9.70227	9.42776	9.10372	7.89473	7.73467	8.46269
9.81134	9.89999	9.92498	9.87673	10.2602	10.0613	9.97822	11.0477	10.835	11.3821	10.8309	10.3305	9.50813	11.1696	11.7375	10.4927	10.5655	10.8404	10.432	10.6014	10.8049	9.79102	11.2048	10.9188	11.2788	11.2111	11.2294
7.48171	7.77043	8.23222	7.52508	6.58264	6.35204	6.77279	9.68091	9.40373	7.87407	8.55263	8.39624	7.36275	9.0492	9.54459	8.94269	8.77034	9.79888	8.10155	9.90544	9.17744	8.97983	8.95778	8.41084	9.30562	9.36777	8.36364
11.6084	11.5238	11.5264	11.7771	11.2878	11.7175	11.7607	10.9764	10.9138	10.0129	11.0902	11.0753	11.1917	11.0559	10.7036	10.8868	10.8756	11.5979	11.4023	11.5185	11.3996	11.4066	11.4749	11.3458	11.2145	10.7365	11.0729
8.79327	9.28073	9.50004	9.28132	8.48367	8.54021	8.57832	8.42582	8.59895	7.59169	8.73642	8.08115	7.66743	8.51044	7.40356	8.74467	8.96673	9.49306	7.63922	7.82121	8.45366	7.58906	7.95903	8.39384	9.27956	8.52297	8.58704
10.4191	10.6663	10.7674	10.3994	9.53851	10.1259	9.7195	9.31695	9.40823	9.26948	9.83976	9.83976	10.1198	9.87406	9.29637	9.91144	10.048	10.0461	9.38658	9.31566	10.0141	8.90967	9.47723	9.66611	10.2779	10.0876	10.0475
13.8016	13.7992	14.0071	13.9264	13.314	13.6974	13.7607	13.9772	14.1351	14.2761	14.1405	13.9858	13.8634	14.1948	14.1459	14.1621	14.2684	14.2736	13.9282	14.0748	14.1358	14.2279	13.7683	13.9039	13.9534	13.9345	13.9328
4.79949	4.15096	3.29533	3.95404	3.95566	3.79849	3.95404	8.60219	9.00691	2.29434	8.63852	4.01778	1.32072	6.13338	2.65306	8.51477	8.27463	8.21624	7.31281	7.29454	7.29454	5.23665	7.30341	6.92085	8.18827	8.40927	7.97063
12.1114	11.9386	11.5634	11.5549	11.5993	11.5664	11.5113	12.7941	12.8141	11.721	12.9633	12.6497	12.8471	12.6779	12.2456	12.9544	12.9217	13.0906	12.7076	12.5987	12.7367	12.5537	12.5342	12.7658	12.9806	12.9806	12.578
14.979	15.0727	14.9938	15.0178	14.785	14.761	14.7483	14.3638	14.3765	14.6082	14.5033	14.5666	14.6976	14.3248	14.5329	14.5649	14.5889	14.5823	14.6009	14.6629	14.6896	14.6131	14.528	14.6246	14.5688	14.5835	14.4908
7.16712	7.44836	7.5293	7.23953	7.00735	7.36885	6.732	8.6251	8.74491	8.14939	9.52235	8.90527	9.74149	8.67814	8.97878	8.63879	9.12164	9.82639	10.2605	9.53504	9.86938	9.18512	9.55994	8.67673	8.99049	9.19102	8.87678
7.93887	7.64688	7.61852	8.00105	8.03217	7.85202	8.14321	8.74751	9.07304	8.44881	8.94411	9.45605	9.60124	9.1941	9.39961	8.99603	8.74751	9.20618	8.52203	9.16712	9.05082	9.38609	8.09668	9.0264	9.20776	8.96938	8.87896
8.25025	8.44876	7.54546	7.88752	8.68301	7.96871	8.07609	7.76628	8.41088	8.38721	8.08999	7.82466	8.26384	7.33226	7.37117	7.94538	7.01659	6.95009	6.42101	7.1171	6.42101	6.42101	6.42101	6.42101	7.89127	8.24901	6.42101
11.3369	11.6221	10.747	11.2261	11.6694	11.3626	11.5141	9.06372	9.49863	9.69584	9.75303	9.10881	7.89707	9.46003	9.54791	8.89138	9.02617	7.86001	7.66071	8.44596	7.79601	6.67263	8.6045	8.39918	9.15434	9.42899	8.74271
10.1029	10.3009	10.0285	10.1627	10.9774	10.4713	10.4202	10.2243	10.1234	10.8746	10.2243	10.561	10.5164	10.2243	10.2946	10.2243	10.0382	9.94162	10.1872	9.87461	10.3153	10.8935	10.4546	10.5237	10.5315	10.2326	10.5789
7.43301	6.18271	8.13217	8.18279	6.18271	6.82623	6.18271	7.2025	7.81671	3.15893	8.64231	5.91181	8.19975	7.04367	7.5819	7.43652	7.9873	7.66519	5.6934	9.45706	8.21738	5.71309	7.3507	6.18152	7.36892	7.35743	4.89063
12.1801	11.692	12.6091	12.431	10.8895	12.0613	11.8109	11.4939	11.822	11.3617	11.9604	11.9414	12.1168	11.4421	12.2834	11.8563	11.9501	12.2017	11.7894	12.2132	11.9402	11.4674	11.4862	11.629	11.5071	11.8177	11.0371
12.4814	12.3343	11.701	12.4131	12.5157	12.1197	12.3738	11.6249	11.8273	11.983	12.237	11.3394	10.9269	11.9655	12.3576	12.2117	12.0331	11.3275	11.3406	11.0851	11.8381	10.7132	11.1558	11.5205	11.911	11.7648	11.9958
8.69476	8.62416	10.4591	8.44028	10.8197	10.0787	10.3951	8.71132	9.31719	7.36285	9.18676	9.22578	8.18285	8.44457	4.66575	9.23646	7.89338	7.26257	7.91124	5.26224	7.2978	8.91817	9.02937	7.31001	7.44095	7.18552	8.052
11.7649	11.2875	12.8442	11.5965	12.1452	12.1452	12.5358	11.5974	11.9851	12.5417	12.0762	12.4031	11.0657	11.7824	9.46699	12.1225	10.6273	11.099	11.6708	9.97608	11.0686	12.2229	12.1777	11.1492	11.0748	10.8415	11.0582
10.1727	10.6926	10.6926	11.188	10.7049	10.7269	10.2354	9.36377	8.99558	9.3245	9.225	8.3155	5.2819	8.52544	8.99303	8.43816	9.39155	9.72015	9.95384	8.92636	10.3498	9.83035	9.97328	9.73979	8.31358	8.53701	8.60386
8.79939	8.72086	8.42428	8.59684	8.57643	7.93162	7.46168	10.883	11.2913	10.3308	11.6985	10.5487	11.9268	11.112	11.0004	11.6464	11.7475	11.1215	10.3712	11.2407	11.0104	10.2032	10.894	10.3038	10.7163	10.9069	11.0565
8.69477	8.55591	8.34796	8.15959	7.55128	7.65551	7.12317	9.12846	9.21585	8.91841	9.30872	8.97877	10.0807	9.13237	8.9349	9.63511	9.67292	9.68373	9.07932	9.68373	9.52948	8.05934	9.30486	8.82056	8.75913	9.46687	8.63794
9.98328	9.68487	9.60323	9.32842	8.71054	9.01226	8.67719	10.9716	10.869	10.0169	10.3378	10.8169	11.5867	11.4284	10.5276	10.8679	10.9736	11.2288	10.7854	10.7822	10.7995	10.5859	10.2283	10.1591	10.9485	10.5469	11.3169
9.72892	10.1588	10.5684	9.99235	10.4722	10.5829	10.5335	12.5904	12.4402	12.5882	12.1295	13.0721	12.3138	11.9403	12.0616	11.8384	11.7165	11.8283	12.1574	11.4388	12.2883	12.5536	12.244	12.1877	12.0631	12.0197	12.101
10.2779	10.8665	10.8447	10.3287	12.0747	11.6829	12.269	11.166	11.2395	11.6775	10.7433	12.0306	11.2184	10.7984	9.7118	10.3653	10.0064	9.15114	9.89231	9.48851	9.49541	10.9637	9.9179	10.3667	10.4996	10.2713	10.3547
9.56961	9.95379	9.78705	9.19484	10.773	10.6415	11.3448	11.2831	11.2222	11.5479	10.7199	12.3292	10.7402	11.3449	10.2221	10.4502	10.0703	9.85545	10.3484	8.99378	9.67546	10.9314	9.82467	10.6319	10.7437	10.3377	10.2084
4.86544	4.78075	4.44617	4.82572	5.68808	4.82572	5.30924	6.90817	7.25178	4.5558	7.61042	6.08568	5.02693	7.35883	6.23503	7.27481	7.37464	7.53209	8.09918	7.33319	7.14099	8.7125	7.43682	6.62508	6.47916	6.47916	6.80215
5.80494	5.72076	5.72076	5.68255	5.72076	5.22169	5.72076	8.66298	8.66298	9.46026	9.54262	9.05866	9.37485	9.83238	8.73447	8.97377	9.627	9.02198	9.02198	9.13431	9.09846	9.02198	8.64249	8.72016	9.01519	9.02198	8.35675
11.467	11.7401	11.7647	11.6893	11.716	11.8354	11.7349	10.6461	10.9738	11.2512	10.972	11.1334	10.8356	11.0048	10.316	10.6462	10.9274	11.3933	11.3015	10.3685	11.5	11.3705	11.3525	11.6514	11.4754	11.4467	11.6576
11.3617	11.2036	11.2665	11.3306	10.9504	11.1902	11.1484	11.3983	11.4319	11.1132	11.8104	11.6232	11.7554	11.4561	11.0655	11.3077	11.2607	11.4474	11.1347	11.0599	11.2489	11.0393	10.8964	10.9119	11.5178	11.5107	11.4832
12.6657	12.8891	12.5527	12.6351	12.3503	12.6022	12.3611	11.5097	11.6463	12.2377	11.7839	11.9789	12.4257	11.8762	12.0712	11.9785	11.8366	11.886	11.7915	11.9785	11.8835	11.7795	11.7939	11.958	12.1846	12.0377	11.6568
8.58817	8.81912	8.18504	8.94764	9.64712	9.31941	9.15785	9.06364	9.48877	9.38842	10.044	9.7971	9.84241	9.61408	9.40596	9.58457	10.0552	9.16009	9.26523	9.41662	9.60887	9.6899	9.69703	9.75087	9.1418	9.16308	9.27445
9.62826	9.67689	9.67519	9.48556	10.3736	10.3992	10.1975	10.7387	10.4041	10.5565	10.6297	10.5228	10.4324	10.2116	10.033	9.94519	9.88569	10.7001	9.90682	9.86255	10.8148	11.4631	10.9534	11.1508	10.8773	10.7903	10.9912
12.5709	11.9315	11.9333	12.2991	12.0644	12.2405	12.0599	9.97856	10.4635	10.2398	10.7587	10.6671	10.7023	10.816	11.1406	10.5626	10.537	10.1153	10.5717	10.1141	10.487	9.93274	10.0937	10.1313	10.5359	10.5242	9.42609
11.9583	11.9158	12.2135	12.2663	11.2423	11.8922	11.4528	11.1776	10.2906	10.3561	10.5777	10.37	11.1712	10.6343	10.3007	10.7122	10.5062	11.4875	11.1359	10.9941	11.5478	10.2647	11.3162	10.7751	10.9398	10.814	10.9033
8.98532	9.52151	8.20348	9.10449	9.42233	7.51146	8.82763	8.77079	7.45735	5.81028	6.87706	7.09377	7.21057	7.07043	7.11367	7.21057	8.54826	7.96101	8.44693	7.09591	8.0014	8.09257	6.7007	7.50824	6.53437	7.22483	6.47942
9.50341	8.97489	9.04218	9.04218	8.43557	9.33855	8.77369	10.1639	10.9135	10.4164	10.8621	10.6117	10.983	10.774	10.8568	10.8112	10.7521	10.0542	10.027	10.5248	9.3622	8.786	9.71337	9.95185	10.4519	11.1291	10.5414
7.98547	7.6056	8.33667	7.49783	6.96123	7.13863	7.06937	6.39877	6.02713	6.84965	6.09962	6.97424	7.29267	6.50748	6.17607	5.62681	6.01251	6.59736	6.60283	6.69398	6.6627	6.77388	6.37189	6.40765	4.7483	6.04073	6.09601
9.392	9.05181	8.83499	9.2207	9.74554	9.59183	9.95986	8.72066	8.6268	7.78219	9.12126	9.0478	9.20722	8.70481	8.1255	8.45844	8.69482	9.30903	8.72578	8.52311	9.04617	9.55603	9.18016	9.36489	8.71821	8.73887	9.52214
6.5738	7.57182	6.85768	7.00003	8.0018	8.03008	8.15422	9.22941	9.16227	9.21002	9.15114	9.2927	7.34557	9.4633	10.2816	9.02441	9.23276	9.53823	9.32207	9.16272	9.26721	10.1958	9.82072	9.90249	9.53823	9.58161	9.56187
6.46709	6.15735	6.56919	6.26795	5.90151	5.55039	6.15735	8.76117	8.46862	5.37746	8.97425	8.33457	9.4029	8.57606	7.66365	8.31825	8.29082	9.92906	7.5737	9.75816	8.97587	7.49442	8.79483	7.38108	7.38167	7.38108	7.54405
11.8412	12.2469	12.2025	12.0606	11.2901	11.966	11.8904	11.8723	11.9615	12.1738	11.9975	12.251	12.548	12.1665	11.6798	11.7387	11.9988	12.9252	12.273	12.8056	12.648	12.0298	12.2329	12.4194	12.244	12.3229	12.2174
9.33536	9.52922	9.51562	9.59426	10.153	10.2124	10.254	10.3744	10.1944	11.3542	10.539	11.2359	10.3984	10.2944	10.4279	10.1864	10.4652	10.4636	10.698	10.4858	10.4185	10.8442	10.9947	11.1443	10.6746	10.4655	10.4892
11.8026	11.9173	12.0411	11.8927	12.048	12.1799	12.2514	11.6848	11.7724	12.1409	11.5806	12.0436	11.8672	11.7124	11.2522	11.4622	11.6173	11.8707	11.8436	11.6338	11.96	12.2274	12.087	12.0035	11.5214	11.7032	11.7202
11.4448	11.4062	11.465	11.1058	10.3984	10.8772	10.4426	10.6427	10.7046	10.6961	10.8062	10.8153	11.5882	10.8127	10.7755	10.9656	11.2493	11.3631	10.6962	11.4271	11.2079	10.2263	10.7796	10.6026	10.8851	10.9304	10.2759
10.3973	10.5745	10.4108	10.2906	10.5406	10.1878	10.3556	11.1588	11.0786	11.732	11.4129	11.3649	11.267	11.6956	12.2392	11.1479	11.3771	10.2327	10.7037	10.2227	10.3479	11.5694	10.4859	10.7425	10.9817	10.8902	11.3095
12.6596	12.8614	12.5571	12.3912	13.5919	13.3732	13.6069	12.6543	12.6516	12.4489	12.7136	13.1104	13.1632	12.7547	12.8347	12.5209	12.5316	11.8599	12.1301	11.7651	12.046	12.5135	12.3585	12.5353	12.9055	12.8423	13.0696
10.113	9.69692	9.80152	9.5476	9.8695	9.47372	9.64768	10.3861	10.3011	7.90875	9.52375	9.665	10.0568	10.0821	9.76417	10.0251	10.1632	10.7541	10.565	10.1544	9.90156	9.90542	10.4019	10.0981	10.4784	10.4393	10.4692
10.1048	10.4964	10.1048	9.98593	10.2291	10.1048	9.94804	10.601	10.3742	10.6851	10.8214	10.9419	10.8669	10.725	10.6584	10.5724	10.4704	11.2218	11.3529	10.2338	11.0613	11.5264	11.1689	10.9117	11.0855	11.1425	11.0404
10.4891	10.3973	10.3586	10.0797	9.19071	9.54175	9.96659	10.8255	10.6156	10.3047	10.3066	11.0732	11.3223	10.7104	10.4917	10.568	10.7016	11.2568	11.2796	11.0137	11.0441	11.0595	10.9247	11.0769	10.9059	10.4621	10.8242
9.42279	8.58041	8.18296	8.28186	10.747	10.2569	10.4126	9.44368	9.72708	9.72448	10.4897	9.13704	6.38531	9.50912	11.1984	9.05342	9.62181	8.49198	4.78018	5.99241	8.12235	7.26282	4.45701	9.69319	9.93247	9.77829	9.12715
12.2406	12.2625	12.5599	12.0076	11.9949	12.2608	12.1833	12.6327	12.6576	13.002	12.2617	12.8974	12.3561	12.3544	12.3808	12.2589	12.1084	12.3597	12.2359	12.0636	12.4149	12.5809	12.4044	12.5778	12.4958	12.0499	12.3378
4.22258	4.27363	5.0096	4.27363	4.27363	4.26734	5.02166	7.41825	7.27285	7.31364	6.89971	6.46817	5.67292	7.31651	6.90271	5.95924	6.05209	6.1082	6.1082	6.1082	6.1082	6.1082	6.1082	6.1082	6.1082	6.1082	6.1082
12.4567	12.4494	12.544	12.2206	11.6431	11.6769	11.6367	12.1241	12.4447	11.6972	12.041	12.3747	12.7154	12.6134	11.8901	12.3936	12.6164	12.2955	12.0353	11.9913	12.178	11.9405	11.3412	11.6339	12.2919	12.5551	12.299
10.9443	11.2183	11.2594	10.7271	11.4843	11.567	11.6412	12.6829	12.6674	12.6001	12.6813	12.9671	11.2241	12.8993	12.6683	12.3927	12.199	12.0228	11.7962	11.9298	11.9027	12.0316	12.0043	12.0683	12.3016	12.4356	12.4033
11.4603	10.0142	10.0502	11.8266	11.0874	11.3871	10.8467	9.8548	10.3866	10.8557	10.7407	10.1805	10.5561	10.8568	11.4243	11.3491	10.6172	11.9259	11.8353	11.9662	12.0954	12.2748	12.3911	12.2671	10.4656	10.5787	10.1576
9.61167	9.24882	8.74463	8.64073	9.5032	9.32605	8.88759	7.40135	7.32589	6.79467	6.65862	7.08756	7.57153	7.4013	7.71375	7.19525	7.82055	7.50989	7.06088	7.70755	7.65959	5.54334	8.19603	7.96569	8.50203	8.64217	8.93476
11.6786	11.5116	11.2295	11.2279	10.0389	10.6447	10.4398	11.3552	11.2827	11.1697	11.1228	11.2052	12.0447	10.9227	11.3599	11.2171	11.073	11.196	10.9324	11.5085	11.1411	10.0597	10.7569	10.258	10.8585	10.4169	10.732
10.7514	10.3694	10.0131	10.1784	8.7135	9.48807	9.60774	10.2807	10.0192	7.12404	9.8031	9.41143	10.9444	9.47484	10.0678	10.0426	9.75266	10.8229	9.61136	10.713	10.1249	8.4719	9.45722	9.13618	9.90852	10.2455	9.40094
13.0375	13.1613	13.4012	13.6968	13.1977	13.2396	13.2396	10.2891	10.6474	10.5187	11.1411	10.4178	9.90995	10.4216	10.2225	10.2066	10.2754	11.0077	10.7852	10.8224	10.9801	10.7791	10.7065	10.9001	9.96666	10.3735	10.6075
7.92515	8.59911	7.92515	7.55124	8.50314	7.92515	7.50922	8.81281	9.00663	7.97111	9.0956	8.26557	9.02129	9.20491	9.25275	8.96695	9.15717	9.27171	9.71194	8.82721	9.27887	8.87323	8.97785	9.30254	9.92122	9.6918	9.38681
8.36868	8.56337	8.33515	8.53003	8.58277	8.67812	8.70092	7.01045	7.39254	7.19621	7.57176	7.72617	8.48704	7.68004	7.29151	7.34921	7.53906	6.91523	6.9405	6.9405	6.9405	6.94224	6.9405	7.31666	7.63249	7.41056	7.70983
9.9524	10.2327	10.0258	10.0298	10.2877	10.0298	10.0298	9.33511	9.72634	9.47491	10.0212	9.8437	10.5014	9.95071	9.69934	9.74755	9.93037	9.72879	9.89227	9.61234	10.0475	10.0974	9.71942	9.89322	9.9501	9.9534	9.79417
9.34897	9.89157	9.63652	9.82455	10.3507	10.0678	9.86289	8.79768	9.05959	8.94092	9.59537	9.47693	8.94092	9.07766	8.10014	8.62265	9.07327	9.56691	10.0195	8.93503	9.48513	9.48063	9.57619	9.71091	9.32241	9.07091	9.49958
8.09839	6.69656	8.34985	8.22476	7.07005	7.31643	8.09824	3.43407	3.43407	3.43407	3.43407	3.43407	3.43407	3.43407	3.43407	3.43407	3.43407	4.26684	4.41363	5.11082	4.93795	2.54612	4.84743	4.449	3.61881	4.36779	3.86206
9.88335	10.0487	10.0714	10.2346	10.0224	10.1693	10.1602	9.12721	9.26062	9.1321	9.52195	9.49191	9.88162	8.75321	7.79204	8.64659	8.83679	8.42468	8.60315	8.21633	8.45474	7.26309	7.86852	8.64284	8.45145	9.25339	8.48082
11.4421	11.4421	11.9788	11.1045	11.1441	11.4215	11.6028	11.9445	11.81	11.4006	11.5754	12.1915	11.5558	11.7359	11.2542	11.2701	10.8934	11.0982	10.8092	10.6515	10.7519	11.2767	10.5741	11.0283	11.1384	11.47	10.97
9.42089	9.42089	9.24256	9.51544	9.74244	9.64834	10.3772	10.7246	10.2746	11.0472	10.0856	10.8604	10.2068	10.5613	11.2338	9.90993	9.80427	9.69524	9.95578	10.0567	9.95578	10.4151	10.1789	10.5498	10.4237	10.2874	10.4577
7.0572	6.65172	6.83395	7.19105	7.4971	7.32458	7.21554	7.03126	7.17271	6.89704	7.11063	7.39874	6.92608	7.39638	6.89704	7.0111	7.17262	7.97337	7.43344	7.42763	7.82799	8.02522	7.6414	7.71595	6.6204	7.33683	7.42361
11.5187	10.5234	11.3676	11.1742	12.3145	12.2172	11.2504	7.90436	8.4086	6.96153	8.52362	7.60904	6.96153	6.96153	7.10386	7.91976	7.01182	7.68784	7.6433	7.14023	7.22958	6.78126	8.4354	8.29999	8.4868	8.79313	7.51235
8.63139	7.17969	8.68475	8.23264	6.57973	7.60763	6.52793	8.90828	9.27856	5.30037	9.91472	7.39342	9.63809	8.6733	9.55281	9.09279	8.79346	9.37432	9.05827	9.25927	8.72607	4.66696	8.1847	8.57938	8.65848	8.72912	8.64829
10.6759	10.2608	11.5261	10.2567	8.89782	9.94301	8.51769	11.486	11.8705	8.13624	12.0813	10.5274	11.9583	11.2556	11.6455	11.7502	11.2543	12.3933	11.3159	11.6079	11.3404	9.70792	10.3961	11.1125	10.6287	10.8273	10.3484
6.61713	6.89046	7.27614	6.49458	8.25531	7.50723	8.32943	9.1787	9.79433	9.9126	9.1181	8.73707	6.98427	8.82041	8.82542	8.72563	8.62679	7.57319	7.86557	7.72703	7.52349	9.20817	8.29977	8.45609	8.44769	8.68994	8.5485
11.9728	11.427	11.7937	11.5921	11.0177	11.3488	11.3226	11.6939	11.7527	10.4227	11.4632	11.8205	12.0796	11.5765	11.7164	11.1958	11.1388	12.1482	11.6726	11.9545	11.5456	11.117	11.0804	10.989	10.9271	10.9767	10.7992
9.06026	9.03953	8.72036	8.97371	8.97371	8.67095	8.97371	9.74571	9.78509	8.97277	10.0491	9.65832	9.8896	9.92877	9.89715	9.91525	9.86373	8.94637	9.25988	9.61344	9.08007	9.49561	8.92327	9.28	9.7211	9.65196	9.24285
11.2838	11.3735	9.90454	10.6	11.6014	11.2838	11.2737	10.0432	10.355	11.3686	10.8507	9.77704	8.93133	9.87263	9.65078	10.2908	10.6725	9.95412	9.71208	9.15949	9.38174	8.47974	9.38174	9.38174	10.7442	10.3644	10.3189
8.43836	8.53175	8.45578	8.20665	8.86806	8.45578	8.45578	7.99412	8.21092	8.56185	8.19096	8.2032	7.80467	8.41271	7.71679	8.07319	8.45679	7.85088	7.99243	8.04734	7.93994	8.76409	7.99316	7.95804	8.02544	8.27748	7.92259
11.4939	11.786	11.6971	11.2914	11.7811	11.7962	11.469	11.5216	11.5591	12.2588	11.5135	11.7008	11.9524	12.1294	12.1249	11.8898	11.6593	11.3444	11.6828	11.54	11.5897	11.727	11.7285	11.9064	12.0228	11.8767	12.4134
9.81127	10.1427	10.0536	9.63612	8.86819	9.42488	9.35244	11.2272	11.5941	11.0461	10.9993	11.7109	11.7038	11.4083	11.2781	11.2175	10.8031	10.8737	10.8737	10.8737	11.3542	10.953	11.1157	10.8737	11.2762	11.1065	11.0762
5.87885	6.62065	11.7592	8.59938	7.46377	8.48776	10.9852	10.3114	9.83401	8.60045	6.72492	10.0243	7.44728	8.61702	4.28359	6.09187	4.46403	5.41092	4.96399	5.66784	4.27618	8.76019	4.94556	5.29576	4.96066	6.45503	5.20659
11.2561	11.0288	13.9062	12.3823	10.5673	11.8964	12.6257	12.6447	12.2176	11.1341	10.7538	12.9952	10.9282	12.1451	10.3426	10.9841	9.72099	10.3254	10.3692	11.0108	10.0678	11.5852	10.0259	9.80819	10.1021	10.7041	9.77159
6.39666	6.39666	11.1807	8.61698	6.39666	7.65673	10.2133	11.7099	11.3355	8.37593	9.60542	11.662	10.0484	10.6318	8.20248	9.0167	7.6874	8.22166	7.40069	8.27881	7.87215	9.62505	7.96576	7.9232	7.98918	8.29494	7.96628
10.83	10.8305	11.0056	10.8721	10.9585	10.9251	11.0681	10.8426	10.9201	10.7785	11.3653	10.9542	11.3373	11.1096	10.9736	11.2251	11.2094	11.1329	11.0185	10.4501	10.9162	11.1752	10.7637	10.8692	10.9462	11.0662	11.0579
3.06779	2.6778	4.05605	3.15586	4.50067	4.61211	3.24609	7.13141	7.74647	4.17461	7.51698	7.30945	7.10572	7.10572	6.03765	4.78068	7.13141	7.17866	6.27566	7.35552	7.35692	8.33092	8.55618	7.03754	6.95644	6.81601	7.47867
9.8502	10.0813	9.82871	9.53162	9.12086	9.71402	9.71402	10.5841	10.8133	10.0132	10.7325	10.9115	10.9651	10.5784	10.5671	10.3783	10.1385	10.489	10.2651	10.2055	9.69192	10.2406	9.942	10.1042	10.4189	10.4103	10.293
10.4431	11.911	13.2521	12.6394	11.7756	12.2218	12.9199	10.1333	11.8656	11.3539	10.7271	11.1529	10.3651	11.5937	10.4076	10.2221	10.6033	10.2237	10.2801	10.8425	11.2595	10.8205	10.3353	11.1828	10.8442	10.3068	10.4747
9.76343	9.76291	9.3284	9.6398	10.7002	9.88453	9.862	10.1651	10.1396	9.72959	10.4387	10.3069	10.4569	10.9476	10.3568	10.2276	10.4706	10.153	10.1805	10.2354	10.1816	10.8457	10.385	10.5082	10.5082	10.5082	10.8388
8.18702	7.68659	7.96428	7.91076	6.92233	7.20174	7.59858	7.86652	8.52438	5.11829	8.42639	7.49421	7.62402	7.84204	7.97126	8.12823	8.29392	8.86796	7.49042	8.50491	7.92447	7.40209	7.54722	7.40209	8.28589	7.92176	7.78387
9.12309	9.3892	9.49023	9.04687	8.08988	8.6478	7.93355	9.80013	10.1762	8.99609	10.253	9.95871	10.1123	9.47234	9.76891	10.2106	9.84315	10.3738	8.41804	10.0709	9.65944	8.23728	9.00578	8.94495	9.7082	9.7427	9.22148
8.19197	8.57605	7.80907	7.71118	8.36326	7.92562	7.92562	7.77938	8.68775	5.14988	8.15513	5.72909	6.48229	8.3841	6.96724	8.16717	8.69311	8.27605	8.3958	7.86718	8.31837	6.28206	7.86217	7.9178	8.87136	8.88636	9.40226
8.32305	8.50947	7.93918	7.93492	7.68197	7.68398	7.63697	9.00393	8.76498	8.71987	9.12379	9.37006	9.41169	9.0133	9.2649	8.92521	9.20956	8.93505	9.54098	8.93786	8.62083	7.70854	8.51614	8.7391	8.51614	8.95572	8.70731
10.6682	10.3531	10.5023	10.3555	10.1846	10.5112	10.6955	10.7153	11.0221	10.9988	10.7722	11.0189	11.1145	11.374	11.1866	11.1271	11.2427	10.1277	10.9857	10.5019	10.7583	10.3528	10.7045	10.9979	11.412	10.8618	11.3547
5.20901	5.25433	5.57786	5.57786	5.95834	5.57786	6.04739	9.46711	9.36395	9.00368	9.26022	10.6905	8.42183	8.49337	9.77037	8.87342	8.61716	8.1959	7.5614	8.64532	8.03334	9.45393	8.43387	8.79276	8.31191	9.0146	9.0567
7.28954	7.74041	7.46627	7.40295	7.90781	7.7106	8.19255	9.10918	8.94725	8.92236	9.31879	7.08237	7.53963	7.64496	8.11062	8.11062	8.23457	7.89049	8.35067	7.91737	8.50328	8.78116	8.04327	8.58064	8.58109	8.50514	9.11501
7.76401	7.3099	6.42971	10.7673	7.15491	7.54568	7.29864	4.20613	7.20059	6.27847	7.01824	3.93421	3.38499	6.66763	8.06735	7.50594	6.3437	9.07931	8.36255	9.15005	9.55164	9.76867	9.63387	9.55144	3.222	5.25332	4.35565
10.7238	11.0404	10.8478	11.1663	10.4738	10.296	10.7695	10.6668	10.3423	9.75183	10.0562	10.2393	10.3592	10.2643	10.4457	10.1074	10.2438	10.8825	10.4509	10.8319	10.7825	10.2646	10.2992	10.1674	10.1548	9.91432	10.0591
10.5995	10.9513	10.4746	10.4193	10.105	9.61917	10.0848	9.28107	9.52718	8.64123	9.98515	9.61121	10.097	9.75521	10.1035	10.3963	9.59939	9.37984	9.47592	9.88031	8.77845	8.81613	8.56518	8.49722	9.53247	9.68466	9.07028
5.11405	5.74848	4.53326	4.91279	7.12364	5.91891	6.39363	8.91052	8.77757	9.40562	8.93524	7.75128	4.05321	9.11734	8.5383	8.76249	8.91052	8.28253	8.16969	7.92361	7.9264	9.42461	8.31997	8.51153	9.03709	9.19777	8.8388
9.90052	9.25047	10.814	11.3343	9.37043	10.655	9.4572	10.4213	10.1673	8.77525	11.4776	10.8053	10.1616	10.2053	11.6504	9.28183	9.51376	11.6616	11.7381	11.0226	11.1095	11.2442	10.5588	11.0382	9.92343	10.7382	9.48787
11.0548	10.513	10.9536	10.738	9.34312	10.1695	9.97135	10.2503	10.2715	5.55923	10.6106	9.31459	8.86669	10.3405	9.41681	10.3009	10.3795	10.8592	10.4964	10.99	10.9603	8.30733	10.1385	9.85204	9.89216	9.80039	9.2938
5.92576	6.33836	6.7427	6.33836	5.35593	6.36004	6.2177	7.61334	7.75392	2.2607	7.63223	5.79103	5.53972	6.40756	5.71946	6.78002	7.13322	8.20884	7.28417	7.52524	8.19616	5.89686	7.4948	6.55477	5.56103	6.08182	4.38824
11.4857	11.0868	10.7803	11.1242	11.011	11.0109	10.8801	11.1307	11.4373	11.2851	11.8036	11.2922	11.9459	11.8422	11.5953	12.1054	12.0252	11.4904	11.6475	11.9796	11.4616	11.4753	11.4957	11.0996	11.7825	11.4247	11.8043
10.563	9.42907	9.52169	11.2836	10.1619	10.4875	10.2053	9.34027	9.53616	10.3835	10.2274	10.101	10.2464	10.0092	10.0322	10.0243	10.2445	11.6013	11.1589	11.7488	12.2467	11.9441	12.4895	11.9912	10.0475	9.63017	9.6956
9.25595	8.91143	6.47154	7.46209	11.6755	10.3259	11.1754	10.9845	10.6767	11.2121	11.1308	10.4216	5.71658	10.4829	12.7957	9.36696	10.3079	7.59713	2.36355	5.99057	7.86147	8.78647	6.11523	10.7166	10.272	10.5236	9.1152
9.13448	9.43399	9.0956	9.27637	9.82184	9.19379	9.23448	10.4507	10.4045	10.6595	10.5622	9.80244	10.1769	10.3977	10.7203	10.3423	10.4908	9.75113	9.43505	10.0529	10.2698	9.6904	9.75966	10.35	10.2302	10.2526	10.3155
9.52337	9.31241	9.61765	9.41335	9.21896	9.18869	9.60492	10.476	10.719	10.3413	10.1179	10.8613	11.3217	10.6726	10.4168	10.4651	10.7336	10.7662	11.2478	10.192	11.0141	10.5023	10.6859	10.5656	10.6	11.1945	10.9592
9.70701	9.19328	10.1019	8.9886	8.77535	9.02083	9.19328	10.6331	10.5655	10.0606	10.4772	10.8485	10.8025	10.2303	9.79727	10.1297	10.5344	10.8765	10.6089	10.7061	10.8615	10.3705	10.1888	10.1266	9.58268	10.6882	9.95275
4.1224	4.01388	3.06156	4.08713	6.23652	5.63782	5.17619	2.34351	2.34351	2.34351	2.34351	2.34351	2.20133	2.34351	2.34351	3.23622	2.34351	2.07253	1.9719	2.00638	1.9663	1.9663	2.34346	3.13417	2.33691	2.72366	3.83915
9.69166	9.14112	9.09633	9.71955	10.557	10.4196	10.1654	11.2835	11.288	11.9773	11.4649	10.6497	9.56452	10.7566	11.6628	11.2857	11.4392	9.40818	10.1899	9.61482	9.52605	10.3324	9.90985	10.4006	10.1013	10.5861	10.4271
12.9199	12.5309	12.4186	12.2395	11.6431	11.8815	11.7525	11.6237	11.6871	11.3971	11.5771	12.0135	11.9766	11.5252	12.1912	11.5875	11.5515	12.1735	11.7642	11.7698	12.0339	11.2806	11.4919	11.5676	11.5204	11.5622	11.2806
8.50279	8.33499	8.86626	8.19593	7.59215	8.02605	7.97301	8.97984	9.16306	7.73558	8.93012	8.16232	8.98407	8.73555	8.48567	9.1578	9.15998	8.7784	8.51829	8.52317	8.51829	7.85153	8.51829	8.52871	8.52996	8.62756	8.65414
10.2167	10.2387	10.2167	9.79897	10.2167	10.3564	10.3559	10.6555	10.6041	10.838	10.3278	10.7136	10.786	10.6527	10.719	10.3114	10.7348	9.77266	9.84644	9.47853	9.60658	9.97738	9.74585	9.67192	10.656	10.5977	10.6931
10.0879	9.95712	10.672	10.1543	9.84956	10.1543	10.3918	9.56914	9.78857	9.1512	9.52369	9.51197	9.79248	9.39265	9.05829	9.32281	9.56132	10.0352	9.78391	9.6741	9.91425	9.54212	9.90654	9.69022	9.17377	9.59167	9.47236
7.97944	7.09349	8.87011	7.99924	6.82383	7.6954	7.31738	8.6133	8.18381	8.55927	7.91598	9.012	8.88897	8.56306	8.95454	7.89738	8.82399	8.17732	8.07568	8.19019	8.54629	8.22824	7.42371	8.21746	7.41865	8.41557	6.99899
9.1471	8.85749	10.0576	9.37396	8.90216	9.43684	9.33829	9.14766	9.25503	9.04515	8.69927	9.44927	9.11632	9.36645	9.53496	8.7091	9.02285	8.8383	8.78689	8.82241	9.42	8.59776	8.91526	9.44584	8.83253	9.69561	9.38984
9.25585	9.03592	10.8422	9.43459	8.83673	9.67479	10.3163	10.0923	10.3998	9.84691	9.51421	11.2549	9.89368	10.2545	9.25978	9.54085	9.44381	9.91833	9.37994	9.88915	9.39058	9.70859	9.19121	9.76584	9.16515	9.31542	8.84123
5.77082	5.95146	5.64005	7.15443	4.74513	4.40462	5.13703	6.19901	6.72056	3.90996	5.7241	7.49797	7.86195	6.89207	6.07507	6.05889	6.07507	8.61854	7.61835	8.69182	8.69685	7.7023	6.47006	7.6547	7.09347	6.46975	6.46975
10.6948	10.817	11.0806	11.1939	9.07592	10.218	10.2547	9.98615	9.78333	9.61248	8.70808	10.516	10.4661	9.80794	10.1421	9.52245	9.32662	10.8964	10.1079	10.9129	10.4817	9.85298	9.87478	9.91719	9.99619	9.8477	9.95586
14.0056	14.3432	14.0294	13.8294	14.3032	14.1046	14.1511	14.6592	14.5965	14.8719	14.5691	14.748	14.7263	14.6747	14.5627	14.5845	14.6202	14.5372	14.5329	14.162	14.4148	14.6856	14.3008	14.4412	14.5932	14.7569	14.7891
9.572	9.29294	9.22148	9.95385	10.9522	11.4666	10.8812	10.5162	11.1446	12.0052	11.2419	10.8345	11.7601	11.0242	11.2867	12.1231	11.9934	11.0699	10.765	11.3842	11.0216	11.8661	12.1725	11.8229	11.0698	11.6241	11.0311
13.9257	13.954	14.4904	14.3398	13.3503	13.954	13.7056	14.4774	14.2426	14.1726	14.4468	14.2625	14.5199	14.1341	13.4292	14.4267	14.2126	14.5007	14.3815	13.9685	14.4963	14.0336	14.2124	14.0479	14.0485	14.1797	14.1732
6.81115	7.59174	8.04295	7.68452	6.54149	7.01957	6.63673	5.18005	4.862	2.78904	4.23008	2.78904	2.78904	4.23008	4.14394	4.37257	4.37257	5.35395	4.57542	6.58215	6.11199	3.87605	5.31122	3.38296	4.31085	5.1023	3.2103
11.7992	11.6167	12.3349	12.1087	10.3309	11.5372	11.4758	12.4373	12.6135	11.2506	12.8271	12.4023	13.0565	12.5565	11.5644	12.7863	12.7177	12.7023	12.1603	12.9688	12.7187	11.8117	12.6138	11.8401	11.7602	12.1925	11.9164
12.3689	12.3689	12.7087	12.7111	11.5103	12.2036	12.3689	10.8397	10.9651	9.58649	10.6839	10.6516	11.3756	11.0019	10.5947	11.4468	11.2395	11.6817	11.0905	12.019	11.7373	10.4857	11.5164	10.9612	10.873	11.1224	10.4948
7.57531	7.74251	7.78076	7.60903	7.558	7.07655	7.23107	8.66111	8.14447	8.69169	8.23948	7.79229	7.55574	8.41197	8.10411	8.32663	8.18409	8.43339	8.38012	8.9634	8.60223	8.11886	8.57494	8.52637	8.63412	8.37912	8.59632
10.1604	10.5233	10.5185	10.4278	10.247	10.3791	10.1311	10.5082	10.1916	10.4866	10.2229	10.2327	10.065	10.1949	10.1722	9.98382	10.4115	11.0849	10.7415	10.8069	11.1037	11.2942	10.8009	10.8532	10.6172	10.2643	10.6967
6.13346	5.88906	6.38058	6.50797	7.18423	6.42967	6.38058	7.37519	7.09684	7.6649	7.4162	7.91882	6.99186	6.73207	6.94133	6.74457	6.10782	6.32571	7.41821	6.49211	6.919	7.70006	7.12768	7.30518	6.2756	6.39265	6.74553
6.36699	5.81908	6.80475	6.36699	7.91825	6.12856	6.13454	7.71943	8.14477	7.42056	7.44848	8.0625	7.14	8.68819	8.45878	7.42056	7.49646	7.07318	7.07312	6.78192	7.32984	8.12954	6.68411	7.53253	7.90116	7.98333	7.675
10.858	10.8126	11.734	10.9102	10.8831	10.5651	11.1275	11.4655	11.292	10.2834	11.1334	11.6306	11.3022	11.3562	11.2834	10.8027	10.7217	9.60383	10.0732	9.32361	10.1247	10.0228	9.56773	10.4112	10.7975	10.8388	10.4249
12.5017	12.6564	12.5591	12.7483	13.0623	12.951	13.2533	12.5568	12.4302	12.0149	12.332	12.6602	12.5919	12.3752	12.1221	12.1165	12.0376	12.4681	12.5834	12.2675	12.7304	12.6342	12.6837	12.6948	12.4446	12.4846	12.6964
10.1332	10.7584	10.0671	10.0639	10.5049	10.2789	10.2374	7.80463	8.88239	9.45286	9.87659	8.58138	8.78524	9.48801	9.39957	9.27301	8.90974	8.92007	8.58659	9.01621	8.58849	8.6294	7.90067	8.31018	9.73554	9.37898	9.1354
8.39675	8.75961	8.58263	8.58263	8.82269	8.52048	8.62435	8.26048	8.91657	8.24632	9.10674	8.90099	8.68818	9.24254	9.01046	8.4166	9.27696	9.18569	9.24252	9.51335	9.22103	9.45451	9.0607	9.3481	9.12478	9.02165	9.03363
6.494	6.31714	5.34705	5.83447	7.07635	5.92295	6.62659	4.6851	4.65793	2.59092	3.87358	3.02127	2.8161	5.39397	4.6851	4.6851	4.73626	5.22828	4.83972	5.25589	4.59263	3.74784	4.67369	5.30865	5.85464	5.88648	6.61719
11.175	11.175	11.0369	11.1187	11.4744	11.175	11.2314	11.2145	10.8621	11.4834	10.8989	11.4436	11.2527	11.7625	12.1482	10.8807	11.1747	10.9319	11.1872	11.1755	11.0491	11.8888	11.0544	11.651	11.412	11.2188	11.7916
12.733	12.8788	12.7391	12.7623	12.4964	12.3799	12.5413	11.4364	11.1328	11.7335	11.7749	11.4802	11.4651	11.9562	11.6394	11.483	11.8008	11.2899	11.2009	10.7232	11.4563	10.7085	11.0175	11.0363	11.7056	11.7353	11.5217
11.8815	11.8815	11.8815	11.666	11.8823	12.0641	12.3359	11.3449	11.3973	11.6451	11.3858	11.7301	11.7623	11.4792	11.4617	11.2225	11.2407	11.1923	10.7013	10.9048	10.8267	11.3964	10.9998	11.1591	11.7419	11.2984	11.814
7.45827	7.91493	7.51245	7.13046	7.88368	7.45827	6.91015	5.92127	6.39691	5.30568	6.10949	2.93149	2.93149	5.78909	5.50573	5.77078	5.52736	6.11344	6.51738	6.25235	6.25235	6.97549	6.25235	6.25235	6.23805	6.19555	6.67724
9.19522	9.14729	8.90689	9.23085	9.58629	9.23937	9.40991	9.55137	9.61068	9.7172	10.0024	9.71013	9.68236	9.77263	9.19826	9.55616	9.54449	9.92871	9.95245	9.56455	9.99323	10.2051	9.932	9.52686	9.40698	9.67046	9.73123
10.0205	10.316	9.63052	9.66029	9.81267	10.1428	9.96149	9.74442	9.7551	10.3166	10.709	9.88556	10.4591	10.3437	9.71394	10.2259	10.1671	10.2821	10.0111	9.83569	9.35434	9.44359	9.50258	9.71508	10.4737	9.99414	10.62
2.88348	2.72586	2.72586	2.72586	2.71289	2.72586	2.72586	5.57814	5.93562	4.12039	6.48781	5.05006	6.22683	5.95273	4.77887	5.41389	5.47134	5.85286	6.06565	5.65011	5.62487	5.54176	5.61458	4.76945	5.61458	5.99031	5.61776
12.476	12.4654	12.0934	12.3618	12.2084	12.3525	12.3851	11.4988	11.6196	10.9587	11.82	11.738	11.8931	11.5784	11.7682	11.6022	11.477	11.3133	11.2431	11.0724	11.3521	11.7678	11.2083	11.362	11.4568	11.5883	11.5894
5.12748	5.60929	4.9799	5.03498	4.49991	4.04108	4.89778	7.82848	8.44558	4.05382	8.65463	6.82434	8.24468	8.32346	7.00897	8.40133	8.14905	7.56642	6.99448	8.21561	7.76214	7.10338	7.34186	6.96453	7.7995	7.4438	9.08489
10.1943	9.93778	10.0564	9.63201	8.60915	9.21532	8.9693	10.4056	10.8035	9.23435	11.0134	10.3685	10.9059	10.7735	9.46964	10.9707	10.5681	10.8319	10.116	10.5851	10.6815	8.94811	10.0404	10.1906	10.6412	10.8752	10.8476
10.7196	10.4355	10.5832	10.0663	9.88364	10.2801	10.04	10.7703	11.1513	11.425	11.3836	11.1698	11.4774	11.1219	10.5313	11.4575	10.8153	10.9134	10.861	10.4456	10.552	10.1412	10.266	10.3485	11.211	11.3827	11.0781
8.7305	8.66446	8.12736	7.69608	8.05479	8.12736	8.02956	7.67261	8.03542	7.42758	8.11376	7.48451	8.3786	7.84997	7.04794	7.97133	7.8914	7.12376	6.63303	6.11519	5.84498	5.05147	5.8763	6.11925	8.02308	8.39777	8.44332
7.60016	7.75353	7.36223	6.85775	8.65148	8.18915	8.64365	9.43131	8.87292	10.3268	10.1421	10.5284	9.12437	9.40279	8.98102	9.14779	9.12154	8.62909	8.17589	7.70737	8.79564	9.23927	8.77017	9.23299	9.20676	9.19614	9.23927
2.10891	2.10891	2.75827	2.16303	2.05099	2.10891	2.10891	2.34061	2.74123	2.70714	2.23704	1.54397	1.54397	3.76384	2.79052	4.52134	3.51071	3.5565	3.5565	5.68834	3.5565	3.5565	3.5565	3.5565	3.5565	3.5565	3.5565
13.2193	13.7546	14.0492	13.9727	12.8849	13.7749	13.8105	11.0843	10.8331	11.5611	11.4895	10.3202	11.3672	11.1089	10.3894	11.1693	11.0527	10.9991	10.9739	12.2389	11.7338	11.3351	10.9878	11.215	11.2637	11.6078	11.5592
8.81203	8.65103	9.19999	9.09119	8.77757	9.39717	9.53983	7.73773	7.52346	7.61625	6.784	8.36583	7.72528	8.51321	7.4425	6.44886	7.8258	10.0332	9.40182	9.10305	9.74126	9.44448	10.0854	9.92558	7.35613	7.5857	8.08117
8.79894	8.44499	8.34251	8.44499	8.67987	8.08575	8.07346	10.0977	9.97356	9.14276	9.79727	9.98089	10.4657	10.2581	10.5565	10.1452	10.2403	9.94626	9.87933	10.1191	9.74439	9.57179	9.74661	9.477	10.2313	9.72676	9.98885
6.19765	5.92101	5.89813	6.46779	6.19765	6.19765	6.27906	8.69489	8.63184	8.58478	8.59601	9.20448	9.14531	8.78781	9.0311	8.40549	8.705	8.91062	8.81634	9.24904	9.08441	9.43268	9.23057	9.03921	8.34545	8.56152	8.55425
11.9394	11.9394	12.0695	11.9529	11.918	11.9305	11.8372	11.6559	11.6368	9.79569	11.6694	11.4816	11.8274	11.7675	11.4735	11.6855	11.4588	11.7798	11.4961	11.8019	11.7759	11.6473	11.6193	11.4715	11.3892	11.5156	11.5263
11.5188	11.4882	11.5579	11.5536	11.5089	11.5264	11.8574	12.1197	12.1413	11.5353	11.8467	12.0184	12.2438	11.7296	11.5081	11.8429	11.7343	11.7713	11.6657	11.5105	11.7882	12.1424	11.7411	11.7696	11.7403	11.5497	11.9359
8.55031	8.76416	7.8826	9.10799	9.59173	8.59861	9.05608	9.12945	9.83163	10.0358	9.7816	9.21384	7.26239	9.35285	9.87366	9.33551	9.24122	9.27611	9.10355	9.80372	9.53594	10.4457	9.74135	9.87872	9.20726	9.14554	8.89542
12.6564	12.4013	12.5716	12.0583	11.6017	12.1616	12.0901	11.9915	12.1492	11.8675	12.1786	11.9335	12.2313	11.8286	11.5565	12.2062	11.9476	11.3263	11.3874	10.56	11.1118	10.5215	11.0955	11.1901	12.0404	11.9884	12.1927
10.1273	10.0024	9.22052	9.53397	9.7935	9.29279	9.30314	4.29621	4.29621	4.49514	4.29621	3.75038	4.29621	4.29621	4.37971	4.29621	4.35209	4.6608	4.67823	5.02964	5.2291	3.80397	4.70305	4.94529	4.28076	4.50684	5.40074
7.3597	6.87485	6.13523	7.1056	7.60992	7.1056	7.15403	7.98928	7.82395	7.08426	8.21855	7.38706	5.69498	7.77814	7.9889	7.44648	7.65613	7.10342	5.83761	6.96781	6.97263	6.86073	7.72151	7.58958	6.09964	6.47285	7.99882
6.84403	6.07267	6.24246	6.80143	7.73423	7.69628	7.97108	7.55728	7.4237	8.84406	7.60787	7.44811	7.20572	8.06836	8.56076	7.20572	8.06392	6.66768	6.07963	6.93624	6.911	7.61666	7.4671	7.79624	7.35957	7.56746	7.20661
9.03359	9.03359	9.59979	9.03359	8.51282	9.03359	9.03359	10.7504	10.7862	10.6419	10.8459	10.9117	11.0806	11.0295	10.5291	10.6834	10.6484	11.0731	10.8191	10.6136	10.7617	10.9779	10.5945	10.9891	10.6553	10.6809	10.8282
6.77192	6.40612	7.64883	6.62985	6.77192	6.77192	6.77192	8.04433	7.88101	8.18778	7.61791	8.45637	7.26043	7.54126	7.34736	7.57294	7.34026	6.88217	7.59437	6.87227	7.63472	7.78475	6.99322	8.05381	7.63915	7.63766	7.09619
10.1195	10.556	10.5479	10.4528	9.9296	10.0449	10.0859	9.36208	9.79116	9.76475	9.53856	10.4974	10.0421	9.68349	9.66588	8.94368	8.97703	8.47541	8.78036	9.15306	9.52555	9.11736	9.03581	9.29485	9.21994	9.21271	9.21611
6.15011	7.47427	6.93745	6.43593	6.71099	6.46015	7.36527	7.20485	6.90741	4.52854	6.06448	5.82349	4.75757	6.16247	5.81615	6.00782	6.19997	5.14175	5.81261	5.23687	6.27426	6.64773	5.71139	6.83158	6.18029	6.4256	6.35966
8.17122	8.35076	8.51003	8.42137	8.79924	8.51003	9.36792	9.22071	9.03667	9.49923	9.07829	9.45281	9.10622	9.31743	9.12652	9.29471	9.03667	9.14836	8.91178	8.67939	9.07477	9.3934	9.20265	9.25364	9.11996	8.90126	9.2228
2.20304	2.20304	2.20304	2.20304	2.20304	2.4921	2.20304	2.29782	2.43211	2.42956	2.29782	2.34913	2.29782	2.29782	2.29782	2.29782	2.29782	2.4752	2.42533	2.73571	2.4775	2.73571	2.4752	2.73571	2.28044	2.44589	2.61664
8.91315	8.86354	8.45665	8.58956	8.87422	8.71869	8.27528	9.34378	9.10967	6.506	9.165	8.1323	9.47192	9.36665	9.06056	9.19658	9.65483	8.95244	9.27646	9.24103	8.97525	8.41767	8.72437	8.74289	9.20744	9.16936	9.85502
6.96624	7.37099	7.13174	6.61523	5.23289	6.52014	6.43121	7.20929	7.01201	7.00932	7.9816	7.69143	8.65646	8.07832	7.13248	7.40544	7.87741	8.16592	7.95414	7.77971	7.91611	7.31929	6.83244	6.64524	7.48057	7.7195	7.7011
11.6731	11.8099	11.5839	11.7243	11.3873	11.5012	11.4439	11.5261	11.4963	11.2236	11.5994	11.8028	12.1454	11.6053	11.4484	11.5905	11.5629	11.8979	11.8905	11.4813	11.3775	11.1734	11.4316	11.6167	11.4751	11.6231	11.7083
5.65718	6.2248	5.86783	5.61569	6.9419	6.96613	7.14328	8.87458	8.75183	9.44843	9.36499	9.42547	8.61523	8.52442	8.1802	7.96913	8.05755	8.15736	8.38275	7.42023	9.02471	9.97592	9.50236	9.53028	8.65008	8.44815	9.28088
6.62214	5.97071	6.61981	6.17192	5.72204	5.43101	6.17192	8.04011	7.86737	5.48009	7.85599	8.42356	4.84885	8.47163	8.82634	8.106	8.51498	8.05289	7.26217	8.37862	6.74524	7.3201	7.2971	6.35784	7.18022	7.31831	7.81979
8.36571	8.3434	7.83855	8.49096	8.77212	8.36571	8.41633	8.80782	9.12321	8.57161	8.90701	9.00647	9.10151	9.16231	8.98965	9.36251	9.20853	9.38549	9.09131	9.03296	9.34928	9.62482	9.5266	9.27955	9.36698	8.90244	9.48598
11.9515	11.976	11.9515	11.7551	12.0176	11.8242	12.3162	10.9379	10.9531	10.8563	11.0975	11.221	10.6555	10.8088	10.366	10.5715	10.463	10.6752	10.6891	10.5451	10.8848	10.2898	10.7469	10.8416	10.7355	10.6596	10.8435
5.91613	4.3786	5.31925	6.91615	5.53677	4.84373	4.50213	5.45881	7.11066	2.14783	6.51499	4.49552	6.98983	6.73227	6.25519	7.54604	7.38269	7.16931	6.23753	8.48565	6.74963	6.14959	5.43889	6.04488	5.71543	6.94559	5.35409
12.8241	12.5982	12.6777	13.0072	12.1825	12.4573	11.967	9.75512	10.1489	10.8576	10.3915	10.2396	11.0657	10.2759	10.6273	10.772	10.5022	10.5128	10.2527	11.3336	10.2877	9.40363	9.64525	9.6306	10.0117	10.5081	9.6598
7.8268	8.68118	7.10606	10.083	9.1341	9.38294	8.71424	7.20043	8.85682	7.77066	9.28653	6.69288	5.85407	8.97412	7.80376	9.75333	9.54103	10.3204	10.3384	11.1851	10.5007	10.5522	11.0885	10.0243	8.46029	8.57419	7.44861
8.26163	8.24226	7.8553	9.32095	9.82412	10.0562	9.22982	8.90427	9.76632	11.0879	10.3082	9.26206	8.18932	10.6646	10.5103	11.0499	11.2358	10.6919	10.5929	11.8974	10.471	11.9242	12.323	10.9985	9.71671	9.81213	9.24569
13.3797	13.3288	12.9294	12.8183	12.7422	12.6247	12.6546	11.414	11.4006	11.0323	11.6157	11.3634	12.223	11.3651	10.4096	11.4236	11.9276	11.5556	11.7171	10.8491	11.3935	11.3438	11.0618	11.5563	11.3365	11.4972	11.3603
11.5101	11.3168	10.3503	10.2798	11.105	10.6733	10.8039	10.1185	10.307	8.62504	10.2416	9.26304	10.6608	10.2659	9.18168	10.1806	10.6235	9.99734	10.2488	9.67123	10.094	9.58178	9.81839	10.0761	10.8607	10.7334	11.1086
12.3809	12.3824	11.677	11.6314	11.6526	11.3992	11.4918	10.6321	10.5282	11.0732	10.6604	10.6154	11.5397	10.9607	9.8915	10.7766	11.441	11.0394	10.9391	10.7665	10.894	10.707	10.6193	10.6758	11.2407	11.3787	11.2036
9.78234	9.6273	9.59996	9.77372	10.4327	10.3121	10.2597	9.46994	9.9629	9.78321	10.1161	9.85373	10.1718	10.1472	9.839	9.91429	10.1051	10.171	9.7722	10.2345	10.2313	10.1002	10.2244	10.3739	10.431	10.3079	10.5974
10.4692	10.2517	10.1013	10.4809	9.51252	9.06674	9.47398	10.3068	10.6017	9.17341	10.6372	10.8711	11.4428	10.5348	10.2045	10.1707	10.7883	11.1038	10.5519	10.8942	10.8408	10.148	9.61934	10.2072	9.84443	10.0654	9.77629
3.47869	3.65843	3.43614	3.61371	3.84618	3.63402	3.54321	5.94355	6.5328	5.03055	6.63206	5.63451	5.33615	5.93378	5.45735	6.11073	6.40954	6.72997	5.64985	6.63296	5.91641	7.42888	6.04151	6.29851	7.40302	6.58401	6.79487
9.51722	9.78454	9.25867	9.48496	10.3156	9.51722	9.25818	4.32602	4.29197	4.32602	4.13236	4.13236	4.29197	4.32602	4.32602	4.29197	4.32897	4.17727	4.52386	4.42513	4.43609	3.85035	4.14372	4.49052	4.49559	4.41161	5.13086
8.31994	8.52142	7.69777	8.2967	9.72339	9.0181	9.05687	10.1834	10.0023	9.1047	10.3204	9.09845	7.71546	9.90085	9.41384	9.86231	10.1231	9.29907	9.45907	9.26118	9.06406	9.97842	9.90715	9.59556	9.94491	9.84417	10.2363
9.97485	10.1487	9.52698	9.49609	9.97323	9.81993	9.54975	8.32421	7.80235	6.79634	7.72741	8.37985	8.00873	8.25584	8.97994	8.23744	8.33995	8.41746	8.92733	8.46109	8.32821	8.89632	7.63925	8.12745	9.15706	8.53951	9.30419
11.8687	11.8372	11.5998	11.9401	11.5528	11.6077	11.4997	10.3177	10.2739	10.1746	10.1224	10.8762	10.8531	10.7957	10.9185	10.589	10.1161	10.6807	11.0537	10.6084	10.8763	10.3922	10.6807	10.5709	11.1083	10.9005	11.0121
8.35438	9.30139	8.09325	8.03715	9.06127	8.37711	7.95984	6.91981	7.04657	5.68804	7.03511	5.85983	6.49893	6.68475	5.27234	6.99926	6.9813	7.8534	8.24545	5.70467	8.37505	6.93862	7.80017	8.60577	7.86867	7.21357	7.93226
8.75848	8.73023	8.76026	8.03312	7.22754	6.9979	5.94015	6.9142	7.6231	4.59461	7.60111	6.65076	7.11844	7.16887	6.43291	7.29078	7.45834	8.6784	7.8577	7.24099	8.15252	7.24716	6.72836	6.62433	6.81925	6.70793	6.67423
12.6029	12.4588	12.5862	12.3764	11.4091	11.9553	11.8369	11.4345	11.4005	11.1726	11.3653	11.4014	11.7742	11.3321	10.6248	11.2835	11.1394	11.9346	11.5926	11.4321	11.8517	11.1904	11.5583	11.6532	11.5526	11.7683	11.5163
10.6528	10.5025	10.5654	10.6288	9.58185	9.72614	9.52425	9.54213	10.0424	8.70969	9.82093	9.28164	10.069	9.67358	8.67471	9.47441	9.85855	11.3043	10.45	10.0804	11.1149	10.2829	10.2296	9.95311	9.35511	9.35087	9.86638
9.74107	10.1355	10.3041	10.0349	9.52029	9.81951	9.96904	8.99505	9.41044	8.92082	9.11616	9.52306	9.9527	9.4229	9.75572	9.18885	9.12604	9.41376	9.61809	9.93287	9.67141	10.4304	9.65535	9.60962	9.96101	9.40459	9.59611
9.74134	9.18618	9.25037	8.94201	8.52006	9.13598	8.69551	9.87317	10.2839	9.52648	8.88074	8.80309	7.48384	10.5822	10.6835	10.771	11.2344	8.89185	7.46282	9.48502	8.83067	4.47713	9.32529	9.42935	10.4291	10.5121	10.2395
11.0253	10.6539	10.5082	10.685	10.0442	10.2269	10.005	10.6849	10.9097	10.6131	11.0507	10.7049	10.9921	11.0507	11.1435	11.3196	11.1969	10.9685	10.7834	11.3498	10.7723	10.125	10.2412	10.4089	10.6974	10.476	10.5995
13.2829	12.9531	12.7014	13.1211	12.5544	12.8173	12.7222	11.6541	11.5544	11.2001	11.8123	11.8595	11.7183	11.9665	12.121	11.4835	12.6398	12.851	11.9418	12.6538	12.7683	11.6708	12.09	11.5828	11.9279	12.1552	11.3342
10.5462	10.772	10.6917	10.6055	11.956	11.659	11.9674	10.8436	10.9629	10.9985	11.0866	11.4592	10.0598	10.6521	10.7121	10.3688	10.2429	10.0423	10.1889	9.97599	10.2229	10.6631	10.605	10.9384	10.8902	10.7723	11.1119
2.35615	2.07771	2.12954	2.07771	2.07771	2.05099	2.07771	2.16873	2.12041	2.11985	2.12041	2.12041	2.54093	2.1494	2.12041	2.12041	2.17672	2.26534	2.26421	2.28102	2.26534	2.14223	2.14223	2.26421	2.26534	2.26534	2.1505
8.23639	7.67522	8.58285	7.9469	6.47847	7.48359	7.67479	9.60899	9.81338	4.12479	9.46117	8.72979	8.59602	9.63562	9.5823	9.09167	9.47294	10.1525	9.42152	10.3696	9.58724	7.13059	9.20762	9.166	9.78181	9.256	9.781
6.12381	6.2752	4.64104	6.55146	5.98149	6.97666	6.2752	5.91751	8.65852	9.01172	8.70082	6.98066	6.25597	8.12828	8.30699	10.0547	9.49216	9.33457	9.03833	10.1985	8.91337	9.66962	9.32015	8.85157	6.2841	7.85517	5.49404
12.8162	12.4586	12.7815	12.6939	11.4463	11.8723	11.0412	10.8825	13.1684	12.6433	12.6643	12.003	13.5061	12.6827	11.8594	13.7995	13.7114	13.3806	12.8489	13.7292	13.0063	12.9143	13.1764	12.543	13.0551	12.4384	12.3835
10.5052	10.8898	10.1472	10.2126	10.5008	10.7572	10.4388	10.8356	10.8543	10.1039	10.6308	10.8896	10.8976	10.8593	10.4625	10.497	10.8907	11.0828	11.1411	10.2322	11.1914	10.929	11.3298	10.9674	10.8719	10.9695	11.2446
12.7807	12.9966	12.7506	12.8497	12.6273	12.5799	12.6059	8.92658	8.92071	8.32971	9.61693	10.1195	9.77067	8.96979	8.22712	8.65648	8.84779	8.60143	8.57172	8.99285	8.8507	8.62047	8.55071	8.50248	8.73883	8.78789	8.64392
4.22737	4.22737	4.22737	4.22737	4.22737	4.22737	4.35891	3.80045	4.27825	2.52279	4.03505	2.58068	1.89252	3.81156	3.2744	4.30462	4.08906	3.52075	3.52075	3.52075	3.52075	3.52075	3.52075	3.52075	3.52075	3.52075	3.52075
7.84713	7.91758	7.72392	7.77313	7.72392	6.70222	7.33723	9.50108	9.2511	8.85773	9.91031	9.50476	9.31428	9.81927	10.0661	9.7681	9.54776	8.67689	9.49752	9.34247	9.78447	9.63524	8.97297	9.18629	8.55452	8.30793	9.1796
6.80353	6.64614	6.76892	7.22299	6.76892	6.80353	6.8706	7.32625	8.03142	8.42678	7.79344	7.06212	5.74309	7.45342	8.76368	7.90239	7.63765	7.87982	6.78387	8.0947	7.77873	8.27696	8.47695	8.06297	7.74712	7.07006	6.30242
10.3523	10.8092	10.1628	10.5037	10.4122	10.1562	10.425	8.86268	9.32525	9.13414	10.1912	9.29768	10.0021	9.72514	9.77162	9.69829	10.1489	9.55987	9.66813	10.0418	9.73105	9.48818	9.68504	9.61077	9.88284	9.65428	9.69473
10.3234	10.1791	10.0361	9.89214	10.566	10.1396	10.0684	9.50344	10.0719	7.97787	9.79566	9.38495	9.9809	10.4958	10.2091	10.7449	10.9292	9.48917	9.94702	10.5355	9.63587	9.5513	9.96505	10.117	11.1292	11.0452	10.3982
9.23166	9.0236	9.17643	8.94318	8.33172	9.00646	9.00646	10.2085	10.4438	10.249	10.0176	10.6496	10.5547	10.9866	10.3923	11.1505	11.2611	10.327	10.4268	11.2023	10.1724	9.4727	10.5532	10.9239	10.9192	11.6882	10.872
12.0807	12.5243	12.5611	12.2413	12.7162	12.7633	12.6525	13.4431	13.4685	13.3987	13.1117	13.7334	13.292	13.1752	13.1298	12.8208	12.754	12.7496	12.8348	12.5236	12.7656	13.2157	12.8623	13.1067	13.1283	13.2056	13.1447
2.32304	2.32304	2.2796	2.32304	2.33192	2.57812	2.32304	4.94536	4.94536	5.53492	4.94536	5.22892	3.61936	5.24194	5.14637	5.04726	4.94536	4.79183	4.27824	5.089	5.07654	5.76482	4.78496	4.86989	5.29029	5.3996	4.72235
8.4893	8.47697	8.53984	8.62817	8.23282	8.28064	8.12317	10.1876	9.69226	9.94422	9.75208	9.58708	10.1035	9.98002	9.42743	9.75154	9.87064	9.59819	9.19723	10.6787	9.73921	10.002	9.34196	9.34857	9.5882	9.90746	9.77538
12.4907	12.7395	12.86	12.8688	13.1761	13.1915	13.2857	12.8702	12.8983	13.1458	12.829	13.1602	12.8548	12.6332	12.6939	12.2821	12.6266	12.4352	12.3179	11.6378	12.3918	12.5298	12.3899	12.6315	12.6456	12.7325	12.6988
10.996	10.8559	10.7654	10.8016	11.2347	10.9271	11.2429	10.0085	10.2899	10.0306	10.3484	10.3953	10.7043	10.2587	9.64559	10.2458	10.3818	10.2836	9.99799	9.76806	10.198	10.3598	10.1566	10.1071	10.4584	9.86232	10.3671
2.25751	2.05099	2.25751	2.25751	2.49861	2.25751	2.25751	2.53642	2.3366	2.56084	2.3366	2.94827	2.86305	2.3366	2.3366	2.3366	2.36115	2.42825	2.05909	2.42825	2.42825	2.42825	2.42825	2.42825	2.42825	2.42825	2.42825
10.9411	10.8339	11.0893	10.8101	10.4198	10.731	10.7805	10.8958	11.0311	10.5662	11.162	10.9225	10.9203	10.9366	10.3319	10.6558	11.1766	11.3926	11.1584	10.9961	11.0609	10.4958	10.8127	10.686	10.9724	11.1566	10.7572
8.77791	9.4898	8.71143	8.83043	8.24023	7.93336	7.80322	8.42055	8.36859	8.97412	8.7995	8.78508	9.64289	8.58583	8.53893	8.51914	8.64733	10.1836	9.69872	10.1838	9.85178	9.50734	9.43754	8.92946	8.46342	8.52754	8.3353
11.3123	10.7643	11.0312	11.8101	11.6455	11.6965	11.6704	11.7622	11.6837	12.3354	11.688	12.0301	11.5591	11.2769	12.0237	11.0338	10.8959	12.5581	11.9888	12.718	12.7925	12.9592	13.1515	12.7655	11.4433	11.4364	11.5973
7.30807	7.69208	7.25202	7.36819	8.80507	8.1693	8.4526	7.17306	7.75955	7.56366	7.54887	8.20151	7.56366	7.25818	7.99063	7.3727	7.28943	6.82425	7.38046	7.95593	7.58464	8.17286	7.94525	8.06976	7.22851	7.30749	7.10535
9.10171	9.20928	8.98047	9.2197	8.78621	9.48578	9.51077	7.01655	7.51274	6.72054	7.04921	8.21155	7.82202	8.1867	8.2642	7.34598	7.83543	6.66634	6.07689	6.11451	7.28058	8.04605	7.28635	6.82181	6.07689	6.60879	7.89242
7.24542	6.83994	7.24432	7.49678	8.51818	8.87608	8.50471	9.5066	9.23797	9.73766	9.708	9.19933	8.82081	9.12964	9.69958	10.5436	10.1572	8.67136	8.23536	9.37751	8.54149	9.24896	9.38634	9.55005	9.28866	9.41124	8.89454
8.32583	8.66349	8.63539	8.48425	9.03159	8.6265	9.12817	9.23405	8.89854	9.6481	9.63725	9.6736	9.16023	9.15978	9.30328	9.09958	8.12149	9.04775	8.98734	8.59991	9.23791	9.4922	9.02997	9.38506	9.58172	9.55346	9.30076
7.95441	8.04757	8.01456	7.86411	8.01456	8.0917	8.16324	8.88213	8.79006	5.51754	8.79739	8.19264	9.18152	8.59331	7.34851	8.03449	8.20869	8.45522	8.03559	8.79789	8.4446	7.23515	8.0478	7.74599	9.35219	9.34902	9.93825
12.1331	12.0133	12.5758	12.051	10.6964	11.5303	11.6219	11.8903	11.7021	11.0642	11.5547	12.2222	12.1005	11.604	11.1201	11.3515	11.1247	11.922	11.817	11.7655	11.6025	11.089	11.1944	10.9693	11.1198	11.7067	11.2594
7.58202	8.31865	8.07611	8.67339	8.328	8.25088	8.65253	9.04359	9.26956	9.63549	9.57739	9.66708	7.95725	9.58253	10.2747	9.43457	9.21415	8.87817	8.59388	9.9001	9.44478	9.89851	9.29979	9.44011	9.44602	9.30278	8.78009
9.8389	10.2227	9.6976	9.93382	10.9249	10.4166	10.519	10.0536	10.0536	10.9686	10.4791	10.195	9.14801	10.1278	10.1669	10.0649	10.0536	9.61539	10.0884	9.58038	9.95456	10.2583	10.3589	10.3156	10.2163	10.1803	10.4514
7.66654	7.53663	7.40064	7.22512	6.47513	6.57462	6.58716	8.92377	9.58561	8.18363	9.7613	8.31648	9.23753	9.4464	8.54529	9.75584	9.94013	9.91589	9.18343	10.2178	9.38375	9.19706	9.50775	9.04001	8.56159	9.56062	9.42373
12.4103	12.3278	12.2516	12.6451	11.2327	11.8115	11.5708	11.1902	11.1403	10.8389	11.4778	10.9913	11.8049	11.6208	10.9527	11.4916	11.7173	11.8373	10.9091	11.779	11.4879	10.4686	10.9959	11.0829	11.2713	11.2759	11.0061
9.1163	8.82882	9.08701	9.1395	9.17919	9.08727	8.7993	7.80432	8.06905	6.88896	8.20032	8.19979	8.25219	8.41739	7.48079	8.15346	8.20032	8.56352	7.84111	8.65644	8.50236	8.10764	8.42249	8.72211	8.37929	8.58084	8.68869
9.48669	9.57226	9.37084	9.60665	9.14617	8.90857	8.5026	8.61109	9.05515	5.79056	8.87134	7.09728	8.63472	8.84105	7.42185	8.98196	9.08484	9.93133	9.19874	9.42491	9.03005	7.20866	9.07551	8.87663	8.3312	9.16609	9.05351
9.66588	9.81699	9.88372	9.73962	9.15349	8.87679	8.89588	9.79899	9.96979	9.15477	10.1397	9.43624	9.90673	9.76719	9.17082	9.94341	10.068	10.0541	10.2677	10.2854	10.4378	10.2082	9.79327	9.65954	9.53305	9.90497	9.25158
9.84946	9.80082	9.67041	9.5408	9.99422	9.5042	9.17468	6.37328	7.1935	5.98805	7.14408	6.16102	6.24722	6.87325	5.79532	6.80063	7.35762	6.68902	7.08035	6.37145	6.90285	6.38653	6.72985	6.49118	6.68983	6.60127	7.46028
13.109	12.8983	12.9896	12.9673	12.2749	12.7114	12.4643	11.9496	11.836	11.0409	12.4722	12.0843	12.3952	12.1243	11.5767	11.9934	12.3351	12.0382	11.9535	12.2079	12.1678	11.4718	12.0042	11.8525	12.1319	12.1056	12.0099
10.7208	10.7671	9.77228	10.1903	10.5161	9.75701	10.0373	9.90444	10.3255	7.96378	10.2239	9.53724	10.3805	10.6007	10.1938	10.4551	10.5602	10.5245	10.2209	10.2188	9.79338	9.20646	9.6234	9.24238	10.4483	10.3704	10.2826
11.7249	11.7071	11.4778	11.2647	10.6902	11.0013	11.0049	11.0661	11.6698	11.2397	11.5548	11.4092	11.5925	11.6334	11.593	11.7128	11.7395	11.696	10.9212	11.7917	11.3443	10.8272	11.0466	10.906	11.5123	11.6774	11.1665
2.73439	3.49162	2.30194	2.45003	5.39823	3.76567	3.76638	5.70233	6.7969	4.95882	6.30013	5.17831	3.85885	6.05561	7.28086	7.30574	7.25748	5.61757	5.17161	6.46923	6.05326	6.95749	6.50254	6.17684	5.4551	6.55325	6.70962
5.82398	6.14211	4.32464	5.64283	7.41327	7.12654	6.81044	8.84478	9.41167	10.0678	9.06843	7.88542	8.97923	8.80588	10.1234	9.61936	9.8139	7.62812	8.32215	8.24569	8.18923	9.47108	9.00617	9.07308	8.4107	8.80337	8.03475
11.3154	11.2599	11.0298	11.0492	10.7775	11.0284	10.8713	10.3289	10.5878	11.1384	11.1382	10.2352	9.9033	10.6359	10.6102	11.0036	10.3597	10.5704	10.6797	10.8908	10.7599	10.6176	10.4157	10.0925	10.3191	10.6367	10.2634
10.046	10.0688	10.0963	9.80132	8.96728	9.67205	9.40122	11.2305	11.504	10.5242	11.4216	11.405	11.7978	11.7073	11.2956	11.5703	11.6204	11.8583	11.5726	11.3211	11.5484	11.1722	11.324	11.1775	11.2976	11.3994	11.2643
11.2442	10.9902	9.3047	12.2282	12.2877	13.0313	11.8081	9.48058	11.5155	11.3431	11.3581	9.87962	12.242	11.359	11.3067	12.5059	12.542	11.3441	11.3932	10.7257	11.3875	11.977	12.1276	12.2259	10.6171	11.4318	9.99182
13.4024	13.0119	12.9547	13.6435	12.8087	12.8601	13.0119	11.3232	11.3159	11.3368	11.9926	11.4001	11.7756	11.8917	12.0659	11.8118	11.8469	12.3268	12.1409	12.523	12.3499	12.2912	12.3766	12.252	11.411	11.4226	11.163
8.82268	9.46106	7.42737	7.99387	9.39323	9.64996	9.94675	10.3734	11.6227	11.9755	11.3114	10.4307	9.72696	10.904	10.9596	12.253	11.957	9.13059	10.048	9.21094	8.32218	9.46023	8.90437	10.0986	11.558	11.6217	11.092
12.5756	12.8352	12.6139	12.4232	12.3852	12.1103	12.0386	11.2535	11.1358	11.1289	11.4411	11.4169	11.8201	11.3909	11.6882	11.0768	11.0991	11.1251	11.2559	11.2964	11.1167	10.8953	10.9935	11.1092	11.5138	11.4109	11.0029
6.497	4.96956	9.39253	7.66839	7.57406	9.02479	10.2012	11.4083	10.8256	9.59026	9.02855	10.2584	6.3105	10.1709	6.42186	8.17449	7.5367	8.10279	7.13963	5.70729	7.75428	9.0891	9.2913	9.03452	8.90044	8.66935	8.88964
6.6946	6.41627	8.44849	7.13574	6.54328	7.73482	9.18991	10.7278	10.0282	10.4393	9.20629	10.663	8.3618	9.76203	6.91605	8.3618	7.71586	7.38369	7.57331	6.74726	8.29184	9.75129	8.19636	8.74853	8.86539	8.13174	8.2324
11.6038	10.8379	10.4804	11.4152	12.3615	12.2745	11.3271	10.7892	11.7383	12.5617	11.4841	10.7467	10.9446	10.7129	11.502	12.3346	12.2578	11.0417	11.1227	10.6654	10.5007	11.8348	11.1413	11.0994	11.4155	11.4696	11.4507
8.60367	8.88433	8.14269	8.7466	9.90239	8.96472	8.65353	4.36786	4.36786	4.36786	4.36786	4.36786	4.36786	4.36786	4.36786	4.36786	4.36786	4.54656	4.85283	4.62794	4.3604	4.67568	4.72524	4.42784	4.63204	4.16499	4.53555
13.1091	13.1738	12.9595	13.0913	12.3102	12.0974	12.3354	10.4139	10.6251	10.4125	11.1298	11.3065	11.4492	10.615	9.26651	9.30816	9.94718	10.7537	10.8169	11.0772	10.4451	9.75478	9.59922	9.81154	9.43632	9.64366	9.54234
11.8626	11.877	12.2467	12.1915	11.1372	11.5865	11.3998	10.6187	10.6569	10.8694	10.7457	11.0981	11.2614	10.4345	11.3962	10.7681	10.405	11.0198	11.0536	11.5115	11.1932	10.3989	10.5535	10.7585	10.3017	10.6604	10.8155
2.05099	2.05099	2.05099	2.05099	2.05099	2.05099	2.07439	3.52791	2.85339	2.46544	3.27337	2.46544	2.46544	2.60129	2.46544	2.46544	2.46544	3.05992	3.05992	3.05992	3.05992	3.05992	3.08564	3.06118	2.80997	3.05992	3.05992
4.46823	5.11131	3.39735	4.85427	6.39964	5.11131	5.68062	7.56857	7.58999	8.37613	7.7334	6.43016	5.1894	7.22153	6.87678	6.44051	6.46333	6.29477	6.64597	6.11093	6.2538	7.88038	6.90213	7.4809	7.29943	6.90213	6.90213
10.8692	10.4261	10.2402	10.377	10.6955	10.4997	10.523	11.6279	11.8589	11.0568	11.9806	11.8453	12.2174	12.4681	12.1189	11.9964	12.5072	11.9077	11.4406	11.3116	11.7997	11.8036	11.7168	11.8986	12.1414	11.8134	12.1226
7.32177	7.2415	6.69075	7.18207	7.39955	7.01684	7.33761	7.91928	8.12115	5.64373	7.85971	7.28811	6.80887	7.82824	7.14804	7.46884	7.98832	7.30131	7.06149	7.67333	7.72691	7.92784	7.72136	7.57495	7.13344	7.22495	7.07209
12.7581	12.8711	12.6356	12.6747	12.4402	12.457	12.3611	10.9206	10.694	10.3072	11.3398	11.083	11.1652	11.2137	10.4723	11.0184	11.1215	10.9709	10.6725	10.9255	11.0555	10.0374	10.6825	10.5873	10.8413	10.753	10.7273
6.13136	6.13136	5.04388	6.13136	6.13148	6.79178	6.13136	6.71449	7.76653	3.66397	6.77789	4.93513	3.1905	6.85637	6.48079	8.48751	7.88711	5.97456	5.04048	5.64972	5.45042	4.7983	5.10212	5.61722	7.33415	6.78362	7.56387
11.6405	11.7495	10.4744	11.6988	12.0222	11.7831	11.4012	8.22364	8.98503	8.55203	7.45807	8.37891	8.72905	7.48017	8.17977	9.36569	9.07968	6.86958	7.41956	7.5014	7.34866	6.213	6.18616	7.24983	8.0174	7.96603	7.67202
11.7216	11.6656	11.3527	11.7015	11.767	11.8148	11.7015	10.5207	10.8102	10.2362	11.0018	11.0354	11.3575	11.0753	10.9647	11.0143	10.743	10.9862	11.0339	10.6436	10.4686	11.0705	10.645	10.6968	11.2882	11.2214	11.2277
7.81838	8.49959	7.97979	8.49959	8.99322	8.52245	8.68888	10.0622	9.95115	10.1707	10.0538	9.8115	10.8093	10.1406	10.6862	10.1134	10.2574	9.70173	9.99811	9.86202	9.51746	10.4913	9.95709	9.59166	9.42324	9.92175	9.43428
9.77148	9.96711	9.49055	9.42095	9.83654	10.284	10.0595	9.33144	9.51087	9.37748	9.68093	9.34951	9.33144	9.56677	9.11044	9.45799	9.33144	9.55419	9.63	9.24685	9.56439	9.01771	9.8239	9.89624	9.98774	9.83987	9.95596
3.00744	3.03838	2.89211	3.19455	3.00744	3.00744	3.06346	3.62115	3.55088	3.55088	3.55088	3.83003	2.83572	3.5811	3.55088	3.78246	3.55088	2.61442	2.91008	3.60728	4.00537	4.27392	3.76312	3.60728	3.54452	3.00661	3.60728
11.6467	11.9277	11.5992	11.5353	10.8135	11.3224	11.4691	11.8216	11.9987	12.2007	12.216	12.086	12.4038	12.2299	11.8549	12.2123	12.3322	12.3062	11.9789	11.9986	12.3062	11.6378	11.6863	12.1769	12.3065	12.2159	12.3062
2.05099	2.05099	2.05099	2.05099	2.05099	2.05099	2.05099	2.26155	2.641	2.04332	2.04332	2.04332	2.04332	2.04332	2.2863	2.04332	2.04332	2.51059	2.43529	2.57404	2.43529	2.43529	2.57404	2.43529	2.44415	2.57404	2.43529
7.95336	7.86323	7.29503	7.69065	8.99984	8.55604	8.13633	8.64843	9.34526	10.5106	10.1286	8.14864	7.58019	8.16322	10.2615	9.8455	8.72951	8.74976	9.10875	9.13571	9.2379	10.409	9.73409	9.51604	7.71471	7.82801	8.13788
7.68563	7.86859	8.25518	8.08559	8.2346	8.46169	7.57466	8.60626	9.04199	6.84435	8.1779	7.91304	7.91304	7.98424	8.18177	9.11052	8.65431	7.84414	8.87731	8.59795	7.14914	9.0333	8.65498	8.27617	8.28873	8.27026	8.06085
10.5872	10.2358	11.0464	10.5872	10.2413	10.8083	10.0744	11.0295	11.4861	11.4924	11.1189	11.1503	11.4998	11.0702	11.4331	11.6388	11.3399	11.3535	11.5775	11.5226	10.728	11.2536	11.2045	10.8773	10.8615	11.0556	10.7213
13.2575	13.5734	13.3731	13.1628	13.9198	13.6437	13.6265	12.9798	13.2765	13.4381	13.291	13.3311	13.5981	13.4516	13.2311	13.3368	13.4128	12.5299	12.4741	12.4249	12.5182	13.0023	12.6126	12.9	13.1662	12.9898	13.136
7.56583	7.13935	6.7247	6.84901	7.54332	6.63013	6.90726	5.98742	5.9408	6.5332	5.84929	3.66622	3.31625	6.60191	6.3243	6.45822	6.92295	5.38228	5.56001	5.81882	5.67152	4.87526	5.65108	5.78726	6.50658	6.95738	7.25616
12.0852	12.1367	11.8146	12.0571	11.8715	11.6313	11.7021	9.81627	9.8178	10.3564	10.107	9.92134	10.6634	10.1391	9.84562	10.048	10.3034	9.36342	9.635	10.0682	9.47503	9.18431	9.38897	9.61052	10.1511	10.1344	9.91797
2.05099	2.05099	2.05099	2.05099	2.05099	2.05099	2.05099	4.9985	4.65178	4.31967	4.86252	4.25257	4.02063	4.96232	4.48751	4.91657	4.67533	5.25801	5.01253	5.25801	5.02901	4.60836	4.61115	4.61542	4.66495	4.60734	5.25801
10.6597	10.5881	10.759	10.3192	10.4341	10.5881	10.5881	11.8091	11.822	10.7284	11.5588	12.1499	11.613	11.6752	11.9272	11.5077	11.234	11.2357	12.2591	11.0728	11.3852	11.1168	10.8712	11.1453	11.3831	11.5079	11.3103
11.0455	10.9464	10.6747	10.9334	10.5342	10.4196	10.5471	10.6321	10.2771	9.11452	10.5842	10.6828	11.5922	10.1726	9.79246	9.91066	10.2707	10.9989	10.8745	10.5131	10.873	9.71996	10.4823	10.2225	10.2602	10.5115	10.4054
10.7792	10.6775	10.1794	11.1252	11.2286	10.8195	10.6465	8.74078	8.16856	8.74078	9.12689	9.044	8.99856	8.20215	8.74078	8.72748	9.06645	9.62928	9.36986	9.8216	9.96116	9.1474	9.88461	9.72199	8.7575	8.91929	9.0305
5.30099	5.80699	5.80699	5.80699	6.60265	5.80699	5.92381	6.42645	6.47385	6.74179	6.20302	6.61908	4.62532	5.10641	6.75278	6.20852	5.58548	3.94467	3.85653	3.81808	4.49118	4.75064	4.64425	4.42084	5.88211	4.88071	5.2888
14.6784	14.5128	14.4041	14.6309	14.6309	14.7155	14.516	14.5815	14.3793	13.9382	14.3166	14.3811	13.8856	14.5423	14.7463	14.4258	14.4232	14.5479	14.3887	12.9239	14.3559	14.4682	14.3307	14.4889	14.7126	14.5765	14.6208
8.4272	8.64677	8.94321	8.68647	8.38686	8.73808	8.69724	9.98942	10.1337	9.06637	9.92385	9.97865	10.0883	9.65809	9.43259	9.57997	9.64643	10.6533	9.56365	9.89964	10.0978	9.63975	9.84976	9.89073	10.0329	9.84806	9.77681
5.56146	3.52251	4.86063	5.02343	4.37754	4.88463	4.88463	2.30987	2.31445	2.39768	2.36431	2.45369	2.45369	2.25523	2.37553	2.25523	2.45369	2.40485	2.64031	2.5697	2.9915	3.68673	2.04739	2.32	2.34938	2.80565	2.52427
7.60677	7.61579	7.6101	7.40366	7.61579	8.05457	7.91704	8.21536	8.665	7.53003	8.80585	8.46255	8.84248	8.46675	8.43957	8.30818	8.70141	8.41705	7.62247	7.44089	8.41858	7.88524	7.74833	7.52247	8.93399	8.5766	8.83149
9.26467	8.84971	9.48376	8.82457	7.56975	8.41921	7.96423	8.9011	9.10283	8.53857	9.00642	9.12748	8.92492	8.91118	9.36724	8.88005	9.07391	8.82171	8.90979	8.57785	8.25912	8.1995	7.65521	8.35169	8.12372	8.86006	8.01906
10.5508	11.4958	10.3077	10.6466	11.5584	10.9812	10.2951	7.97998	8.82319	9.29975	9.07927	8.36934	10.2978	8.92221	7.88138	9.23529	8.68797	8.22818	8.15093	8.64131	8.0485	8.67173	7.70028	8.38156	8.90265	9.66288	8.9714
9.07413	10.0152	8.88079	9.26373	9.95097	8.87136	9.07027	6.618	6.96813	7.37366	6.45667	6.08458	8.44102	7.04118	6.49189	7.45835	7.75821	6.56377	7.04354	6.90431	6.63421	7.1318	5.37244	6.67823	7.1288	7.77501	7.29523
12.64	12.6183	12.6567	12.5854	12.5509	12.3515	12.434	11.7469	11.6052	11.8806	11.768	11.6853	11.0768	11.5487	11.4761	11.1972	11.3897	10.9502	10.9484	11.4306	11.1602	11.2207	11.0004	11.1593	11.5013	11.2693	11.361
9.9348	9.8728	9.65523	9.97664	10.6802	10.2933	9.88274	10.6214	10.8321	10.8729	11.0483	10.6637	10.8936	10.6802	10.8238	11.1389	11.2621	10.2595	10.6294	9.5192	10.2197	10.5847	10.2096	10.4639	10.4651	10.6972	10.4755
13.586	13.2981	13.5604	13.2981	12.947	13.2981	13.2713	11.294	11.2832	10.6757	11.6589	11.686	11.4893	11.6647	11.9293	11.868	11.2764	11.5828	11.0227	10.556	11.243	10.0603	10.8686	10.6066	11.5636	11.7442	10.9226
11.6723	11.1599	11.7565	11.6349	10.005	10.4069	10.4845	11.3461	11.4953	8.74373	11.4754	10.9587	11.2466	11.3542	11.1737	11.6052	11.0775	11.6063	10.6366	11.1252	11.4237	9.76588	10.3415	10.3344	11.2186	11.0728	10.4165
9.06656	9.42978	9.42385	8.91918	8.88723	8.8943	8.94164	8.80234	9.24859	4.67059	8.38623	8.1451	8.79643	9.13274	8.37768	8.74678	9.07736	9.40831	9.65758	8.97237	9.40884	8.35196	9.01751	8.44419	7.995	9.40083	9.12331
11.1922	11.3458	11.4275	11.3315	11.3066	11.4021	11.6427	11.5241	11.3478	10.5139	10.7738	11.6961	11.6921	11.6299	10.8893	11.0854	11.3958	11.2001	11.167	10.9403	11.0749	11.1404	10.9642	11.0137	11.1184	11.2456	11.4167
12.186	11.8719	11.9022	11.9637	11.4023	11.3998	11.8719	10.7077	10.4923	9.57666	10.668	10.7306	10.9319	10.5273	10.1758	10.6291	10.3612	10.9502	10.1679	10.2511	10.404	10.1408	9.90953	10.0596	10.3161	10.0439	10.1596
8.05664	8.20731	8.18802	8.47456	8.94145	8.27159	8.31661	8.28238	8.71268	8.71627	8.92845	9.43128	9.19938	8.18595	8.37747	8.15784	8.47381	8.39796	8.29533	7.94141	8.43711	8.64186	8.35297	8.51088	8.11556	8.55607	8.00509
2.20818	2.20818	2.20818	2.20818	2.20818	2.20818	2.22597	2.56866	3.89442	1.99882	3.86629	2.56866	1.99882	3.59254	2.56866	2.89752	3.06876	2.80089	3.03151	3.03151	3.7275	2.80622	2.82677	3.12283	3.13008	2.8168	3.11543
8.92255	8.98761	9.06991	9.33597	8.44399	8.62373	8.66241	6.46204	6.59167	6.63216	5.64523	6.572	8.083	7.23652	6.7329	6.28121	7.19975	6.62625	6.96145	6.86773	7.02328	7.2527	6.80156	6.88021	6.01425	6.73152	6.5197
8.48915	7.72836	8.45165	8.70655	8.96446	8.48915	8.53378	8.78931	8.99452	9.01435	8.31223	8.78931	9.83636	9.15807	9.84327	8.85056	9.14696	9.37843	9.34422	9.31722	9.52361	9.92647	9.71197	9.52687	8.92716	9.16847	9.13728
8.13265	7.70143	7.72441	7.66269	7.38238	7.72441	8.04697	5.55037	5.47429	5.59232	5.47429	5.92873	6.89478	5.8494	6.56729	5.63491	5.63491	6.10196	6.03686	6.4406	5.63154	6.22369	6.24795	6.3653	4.68812	6.25075	6.36585
9.44847	8.37215	8.11415	8.30338	9.02185	8.87168	9.44673	9.33358	9.86982	9.57263	9.52757	8.92583	8.69905	9.26187	10.6148	9.21005	9.66112	8.55149	4.60842	5.19342	8.85354	6.40792	3.43358	9.47345	9.66812	9.92205	9.00932
10.843	10.9308	10.6501	10.5079	11.4501	11.1753	11.3083	11.8809	11.7622	11.7478	11.8461	11.6597	11.4092	11.6965	11.0945	11.6093	11.7381	11.339	11.5549	11.1576	11.3165	11.6833	11.3993	11.7253	11.4984	11.4923	11.4434
13.8992	13.8506	13.7299	14.2058	14.0781	13.853	14.1338	14.1962	14.1581	13.7708	14.345	14.0532	14.1383	14.5148	13.7641	14.1581	14.4005	13.9586	14.328	13.1534	14.4682	14.3085	14.2032	14.1433	14.0824	14.169	14.2537
11.7197	11.1988	11.0341	11.5354	11.5688	11.844	11.1036	11.5434	12.4132	12.1299	11.9946	11.6375	12.9075	11.937	12.5167	12.9774	12.7112	11.8438	12.2777	11.7862	11.3947	11.2546	11.4534	11.6523	12.122	12.86	12.0035
10.2142	9.20879	9.65182	9.60203	8.43638	9.20879	7.99772	9.44072	10.2353	9.84955	9.95882	9.38408	10.9266	9.49668	10.6899	11.1824	10.7506	9.89227	10.1306	10.2693	9.97991	7.93311	8.51028	8.65158	9.43079	9.622	9.3106
8.8542	9.94905	8.36913	8.77309	8.76478	5.68707	7.3903	7.39757	5.9734	8.57392	7.87374	9.33257	8.08014	6.65094	6.53502	7.27976	7.74227	8.59527	9.13979	8.40731	8.61112	9.06132	5.73197	8.07845	9.09012	9.13406	9.29115
10.1731	9.81707	10.0525	9.87094	9.42099	9.76354	9.81707	10.4569	10.6451	10.4635	10.9233	10.6415	11.3085	10.716	11.0597	10.8613	11.2058	9.90337	10.0523	10.475	10.5669	10.4505	9.92874	9.82722	10.4369	10.8203	10.2915
6.26651	4.44297	5.83855	5.74184	6.49174	5.74184	5.37618	6.62697	6.17323	5.17683	6.12114	4.50304	4.40988	6.32699	7.06944	6.51352	7.67821	6.70439	5.63623	7.22765	7.03122	6.63843	5.91262	5.45747	7.3662	6.12588	6.94521
11.8212	11.588	11.7627	12.0097	11.726	11.7952	11.5312	10.5193	10.3946	10.4594	10.5335	10.582	10.9137	10.6615	10.7605	11.0319	10.8001	10.9909	11.0906	12.3715	11.4976	11.1791	11.3954	11.509	10.6657	10.8797	10.2591
7.98796	7.43364	8.18246	8.17985	8.40386	8.28991	8.36897	7.86008	7.60331	6.35071	7.96365	7.61155	7.96481	8.07036	7.50235	8.44979	7.87609	7.49399	8.08909	6.41366	8.60095	8.94075	8.06503	8.79855	8.0306	7.16626	7.85201
10.6355	10.1539	11.3601	10.9149	10.1428	10.5794	10.24	10.7079	10.6758	10.9176	10.5042	10.789	10.7089	10.7576	10.5515	11.3698	10.7701	11.2348	11.1986	10.9543	11.2711	11.4703	10.6476	10.8222	10.2754	10.8961	10.3579
8.58501	8.53041	6.77583	8.84413	10.4083	10.2527	9.45354	10.6751	10.7693	11.6688	11.7498	9.613	7.84974	11.2093	10.6608	10.93	11.6376	10.2575	10.0339	9.95046	10.3589	11.1049	11.5219	10.6099	10.7277	10.8915	10.9584
8.09637	8.66118	7.63463	7.63549	9.06002	8.42525	8.23429	9.6993	9.97404	10.7314	10.6817	9.71851	9.59789	9.88287	8.50576	10.5901	10.2755	9.68932	9.13902	9.03836	9.70465	10.1815	9.40659	9.85829	10.2649	9.61979	10.1189
11.8218	12.0339	11.7463	12.822	13.1549	13.3376	12.2304	13.6751	13.7669	13.7678	14.425	13.5567	14.7224	14.1699	12.9773	15.0021	15.0131	13.9296	14.685	13.8116	12.7962	13.3521	13.6405	13.177	13.0672	14.7652	14.0711
9.40364	9.40301	8.63107	10.1789	9.88968	9.63406	9.42261	8.96558	8.74491	9.61248	8.66923	9.37963	9.06868	8.79992	9.4823	8.91776	8.97888	10.2476	10.4263	10.1682	10.6227	10.8121	10.3341	10.5318	9.65802	8.96175	9.1005
9.72082	10.4001	9.23899	9.67497	10.2353	10.0943	9.84663	8.47131	8.8275	8.54121	9.41622	8.69321	9.61101	8.81743	8.15999	8.77949	9.0399	9.00533	9.28257	8.21847	9.30395	9.3486	8.97363	9.31419	9.32208	9.24708	9.45693
11.3105	11.2479	10.9434	11.0502	10.383	10.9427	10.7024	10.2297	10.2793	9.9173	10.8042	10.6563	10.9106	10.5251	10.1559	10.7271	10.8558	10.9143	10.5499	10.2231	10.484	10.4507	10.3628	10.6263	10.2914	10.5844	10.7175
7.44348	6.60735	7.14165	7.11554	7.25507	6.85154	7.42611	5.97719	6.72242	3.01721	6.76153	5.76897	8.00782	6.23433	6.35348	6.12455	6.87609	7.07646	4.82317	7.35391	6.13738	4.47794	5.8806	5.98274	6.16662	6.80964	6.92477
11.5223	11.2767	11.4975	11.3382	10.4577	11.0423	10.7248	11.1313	10.8186	10.6146	10.9452	11.1206	11.6944	11.0548	11.4059	10.7726	11.2665	11.3857	10.8924	11.0351	10.8699	10.2136	10.2877	10.5066	11.0808	11.1934	10.5016
7.25941	6.54829	6.70418	8.79528	6.32472	7.28146	6.44671	3.73687	6.97345	3.16809	7.93674	7.14471	8.58416	7.58676	7.68871	8.68474	7.52756	10.8934	10.0932	11.7193	10.3362	9.21683	10.4785	8.78907	6.10784	6.76638	4.89494
9.06061	8.82447	9.45175	10.2255	8.7963	9.18763	8.85753	9.35071	10.4109	11.1727	10.6668	10.8835	11.568	11.0328	11.1449	11.5993	11.1242	12.9931	12.2256	13.2598	12.3877	12.6269	12.6178	11.8185	10.2624	10.8595	10.0189
5.44693	5.21267	6.19445	5.81331	5.18565	5.49145	4.92843	5.6625	6.08569	6.31473	6.09291	7.09494	6.74015	5.79232	7.95908	6.52109	5.43254	7.15649	7.96832	5.51306	6.38446	8.34802	6.38647	5.18405	6.43162	5.29541	6.16213
11.3885	11.2118	11.636	11.5939	11.8891	11.7528	11.641	10.7651	10.5599	10.8488	10.2562	10.2528	9.57578	10.4783	11.0821	10.3648	10.3719	10.1398	10.1783	10.3657	10.3853	10.1082	10.7352	10.1514	10.7405	10.3291	10.9143
11.0941	11.0563	11.0154	11.1592	10.2622	11.1046	9.94171	11.1058	11.1394	11.1139	11.366	11.3334	10.8207	11.5783	11.4873	11.5745	11.4401	11.8081	11.2629	11.5284	11.6121	10.943	11.6306	11.0868	11.3328	11.6619	10.704
9.03813	9.29852	8.95934	8.88996	10.367	9.75881	10.0316	9.94267	10.2524	10.3991	10.4711	10.0275	10.3719	10.5215	9.90443	10.4394	10.2992	9.81647	9.97332	9.78004	10.1698	10.4872	10.4239	10.4912	10.2169	10.2089	10.4882
9.48936	10.0208	9.85134	9.61304	9.57807	9.57807	9.44547	11.265	11.0145	11.1284	10.9824	10.889	10.6915	10.8965	11.2157	10.6865	10.8552	10.1183	10.7031	10.391	10.2379	11.0015	10.9293	10.6298	10.7861	10.5955	10.882
11.6357	11.8463	11.2982	11.2615	11.3565	11.2959	11.0466	10.9542	11.362	11.8885	11.8823	11.0288	12.0669	11.8345	11.7763	12.1192	12.0195	11.5735	11.3685	12.1247	11.4812	10.3187	11.7149	11.3192	12.0231	12.1235	11.5877
9.88473	10.3578	8.7841	9.5795	9.63795	9.63795	9.14763	7.92217	9.22912	7.26286	9.33434	8.01823	9.74538	8.87246	7.52713	9.39243	9.20674	8.73016	9.18768	9.03932	9.04926	7.56887	8.56853	7.79746	8.54112	8.74694	8.62583
4.44049	4.75005	3.20755	4.08727	6.65537	4.50542	4.11359	3.63322	3.54007	3.54007	3.25225	3.16351	2.99519	3.54007	3.61099	3.54007	3.67031	2.75219	3.56576	2.70418	2.70418	3.10292	3.19724	3.36995	4.17682	4.05975	4.70003
8.39093	9.29851	8.26894	8.06375	8.99201	7.47146	6.9901	3.52755	3.52755	3.52755	3.52755	3.52755	3.52755	3.52755	3.52755	3.52755	3.52755	3.17421	4.36215	3.92219	3.74893	3.68617	2.6392	2.54454	3.54608	4.0031	4.18776
2.74722	3.004	2.6169	2.2595	4.07441	2.70371	2.83216	2.04195	2.10968	2.04195	2.49796	2.10968	2.01235	2.1373	2.10968	2.10968	2.19567	2.35879	2.31655	2.28471	2.31655	2.31655	2.3192	2.31655	2.3197	3.00122	2.3773
5.51857	5.15848	5.70084	5.75622	5.83238	5.75267	6.69311	6.90494	7.10788	5.86512	6.69865	6.8346	5.85317	6.49717	6.7426	6.3575	6.92028	6.27723	5.50907	5.71273	6.63807	6.8167	6.32161	6.14629	5.8757	6.102	5.23264
8.57506	9.08738	7.98074	8.59405	10.3967	9.60219	9.77899	9.84348	10.2086	11.1335	10.5257	10.3584	9.6998	10.3784	10.6441	10.0333	10.0574	9.0782	9.03221	9.37549	9.17111	9.95596	9.97962	10.0532	10.1464	10.0648	10.3978
10.359	10.513	10.5449	10.5185	10.0259	10.1759	10.2695	9.93144	10.0587	9.03908	9.97328	9.82328	10.7106	9.96071	9.60043	9.83882	9.98474	10.863	10.4003	10.6119	10.8181	10.6003	10.3072	10.524	9.97023	10.0189	10.2396
11.5189	11.6167	11.4669	11.2286	10.5635	11.0427	10.6273	10.0744	10.1963	10.2004	10.1127	10.6025	10.8384	10.122	9.96818	10.0832	10.1857	11.0423	10.6353	10.6994	11.0032	10.076	10.4423	10.6449	10.7559	10.4395	10.4242
11.7749	11.8232	11.686	11.927	11.6383	11.7691	11.5883	9.041	9.72523	8.73319	9.7696	8.87788	8.09568	9.90346	9.64066	10.1135	9.72415	11.0904	10.5647	10.7577	10.5869	9.47429	10.216	10.4896	10.4204	10.6221	10.109
10.9504	10.8637	10.7621	11.1539	10.749	11.0812	10.7695	8.94242	9.65053	9.2384	9.71031	9.69797	9.64278	9.27085	9.22702	9.44793	9.43415	10.0303	9.44552	9.53994	9.63645	8.61256	9.22369	9.31676	9.1839	9.70708	8.91115
11.8615	11.3651	11.9159	12.0232	11.6202	11.7673	12.1253	11.6031	10.9845	11.3501	10.875	12.0534	11.7049	11.7157	11.9719	11.0467	11.1536	11.4347	11.6686	10.849	11.6392	11.9079	11.5086	11.8526	11.6546	12.0783	12.044
10.4769	10.622	10.2576	10.1049	9.76314	10.0968	9.273	10.8983	11.0757	10.9042	11.4357	10.9033	11.5511	11.0064	10.9656	11.3076	11.2818	11.0882	10.7327	11.263	10.6359	10.3972	10.5752	10.4158	11.1514	11.4077	10.6044
10.3381	10.2977	10.3679	10.3405	9.56387	9.8518	9.86573	8.35974	8.78011	7.58364	8.87086	8.51608	9.70901	8.09381	7.91654	8.26413	9.15396	8.39679	8.66948	8.96111	8.75948	8.54227	8.27543	8.8738	8.45944	8.55869	8.26625
6.86007	7.00404	6.37614	6.38121	5.2913	5.389	5.99194	6.21018	7.0224	5.20087	7.47305	5.90363	7.96649	7.0224	6.16887	6.96565	8.10905	7.52782	7.51269	7.63742	7.36203	5.57157	6.86939	7.05304	7.1847	7.43677	7.58481
10.8344	10.7266	10.6597	10.5437	10.5017	10.7266	10.9049	10.7678	10.8722	10.4586	11.1709	10.6239	11.412	10.6712	10.7323	10.7607	11.0755	10.1858	10.2005	10.4238	10.4256	9.6614	10.2704	10.5193	10.947	10.3718	11.1274
8.09977	7.56402	8.4499	8.09977	7.18823	8.21926	9.05367	6.39834	6.93731	5.63564	6.50361	5.92654	7.70942	6.40408	5.65413	6.79579	7.10156	6.59616	6.40959	6.52467	6.91978	6.72069	6.62201	7.134	6.8895	6.50764	5.69927
12.7822	12.8293	12.9604	13.0556	12.7292	12.8293	12.5633	8.94099	9.15532	8.85917	9.3638	10.5571	9.82782	8.62002	9.97171	8.56933	9.08022	10.7881	10.6208	11.1929	11.0147	10.3791	10.4204	10.5408	10.4787	10.3356	10.2257
4.60821	4.53184	2.60978	3.14677	3.40277	4.64262	4.85661	6.42339	6.43834	6.43838	6.26819	5.84016	6.01622	6.36266	7.89956	6.14188	6.97043	7.72104	6.21255	5.00936	6.85308	7.79399	8.17431	7.34478	6.77303	6.99007	5.83429
10.644	10.4796	10.1812	10.1381	10.7625	9.99932	10.5835	12.2336	12.3723	12.4553	12.7566	12.2138	12.212	12.4343	12.5617	12.7413	12.7488	11.3738	11.6052	11.1882	11.3165	11.8993	10.8349	11.5564	12.1016	12.4297	11.9933
8.28058	8.35917	8.1377	8.02635	8.1007	8.09939	8.1377	7.09604	7.26929	7.61278	7.77417	7.28789	6.16877	6.82771	6.11974	6.77203	6.9602	7.15345	7.01346	7.23125	7.31178	7.59505	7.3366	7.34122	7.29293	7.59699	7.23125
10.0702	10.3213	10.6863	10.3355	10.2384	10.4251	10.763	11.0203	11.2577	11.4443	11.2975	11.8616	11.6293	11.59	11.4844	11.6787	11.6066	11.4121	11.9079	11.5276	11.2178	11.3576	11.2132	11.0304	11.3864	11.8524	11.3351
7.74701	7.62523	8.87298	7.48694	8.21664	8.16616	8.71597	7.83006	8.3555	6.88909	7.7651	8.01448	7.31517	8.05211	6.90373	8.10265	7.67405	8.26184	8.8256	7.70556	8.46139	8.32619	8.53482	8.36018	7.88916	7.06916	7.79332
10.3004	10.177	11.3652	10.1575	9.04933	10.0176	9.89122	11.7796	11.7024	10.9079	10.9132	11.9744	11.6044	11.5364	10.8608	11.2833	11.1874	11.4171	10.7238	11.4496	11.212	10.9885	10.7898	10.5896	10.9145	11.4363	10.7444
9.08773	9.99312	10.0508	10.1904	7.88671	9.15578	8.60357	8.38431	8.93869	9.13815	8.14753	10.048	9.56172	8.14439	8.0641	7.80937	7.13088	11.389	10.1134	11.3981	10.9509	10.646	8.55181	9.84783	9.28908	8.97676	9.2298
14.6014	14.1314	14.3224	14.6	13.8516	14.1465	14.0326	14.5543	14.5463	14.4663	14.5156	14.4925	14.4	14.5275	14.684	14.7989	14.6608	14.767	14.5489	14.9285	14.8454	14.6258	14.7949	14.6699	14.4301	14.4653	14.2896
10.5904	10.7711	10.291	9.9528	12.1141	11.7796	11.6131	11.6223	12.0465	12.1403	11.905	12.1397	12.0395	12.6133	11.4006	11.254	11.8832	10.9793	11.0555	10.3354	10.7555	11.9613	11.2581	11.5866	11.9469	12.3034	12.2364
14.0233	13.4778	13.1614	13.4031	13.653	13.8857	13.5124	13.1824	14.0062	13.4522	13.867	13.203	14.0412	13.7503	13.6198	14.226	14.2486	13.6162	13.314	13.6356	12.6861	12.6589	13.1121	13.4406	14.0331	14.2658	13.7709
12.1102	11.8325	11.7728	11.9183	10.895	11.6012	11.6201	11.2401	11.3224	10.7638	11.3686	11.1657	11.5574	11.0881	10.8559	11.1329	11.3849	11.9244	11.4715	11.7777	11.2674	10.8568	11.2809	10.9021	11.0246	11.1692	11.0896
6.08511	6.87194	5.61469	6.52739	7.29767	6.85883	7.16953	8.1062	8.08375	8.55979	8.01607	8.01157	5.38873	8.32439	8.84716	8.4056	8.44264	7.48127	7.57849	7.51876	7.1794	8.66992	8.23736	8.05317	8.41322	8.14842	7.72952
6.89807	6.78602	7.02541	6.317	6.30688	6.52415	5.45091	3.83676	4.69997	3.59521	3.64525	5.0412	4.93422	3.80322	4.38791	3.74552	2.87343	5.81493	4.05619	3.65048	3.16262	4.88138	3.48954	4.10265	4.95721	3.12223	4.41229
10.8484	11.0414	10.8005	10.8484	10.9967	10.5918	10.8484	9.93273	10.0529	9.677	10.3989	10.3753	10.4165	10.2538	9.95303	10.0622	10.1162	10.1998	9.27086	9.9122	10.3144	10.217	8.8773	9.76269	10.0556	10.0285	10.1235
8.95384	9.16099	9.37678	9.4857	9.28672	9.40552	9.22086	10.0867	10.1881	9.37251	10.0861	10.3479	10.3607	10.1648	9.23954	9.87685	9.51402	10.3575	9.99343	10.0997	10.295	10.0034	9.69865	9.67156	9.73267	9.77909	9.98266
11.7152	11.6054	12.1011	11.8281	11.1583	11.086	11.1424	11.2126	11.1302	10.3371	11.0082	11.1986	11.3833	11.2515	10.8104	11.1589	11.2087	11.6129	11.388	11.5061	11.4222	11.3054	11.0872	10.8308	10.7629	10.9117	10.7121
9.78709	9.95019	11.0147	10.0418	11.2454	11.6927	12.0932	11.2944	11.1641	11.6175	9.92989	11.3619	10.3297	11.2165	10.4706	10.5347	10.6829	10.2903	9.91775	10.4336	9.89096	10.9517	10.8539	10.7084	10.658	11.0025	10.8039
8.63764	8.41212	8.16759	8.03458	9.21769	8.61386	7.94045	9.34396	9.46562	7.35146	9.18617	8.46314	9.01094	9.35969	8.75252	9.29914	9.54503	9.33946	9.47087	8.95888	8.95168	9.16589	9.08465	8.9204	9.19989	9.04626	9.36641
6.54569	7.05329	6.76989	6.76989	6.89433	6.71259	6.76989	4.58225	5.24116	3.63005	4.58225	4.58225	2.74193	5.25117	4.58225	4.58225	4.63217	4.37168	4.48143	4.78723	4.68163	4.37168	4.39579	4.39769	4.64087	4.75246	5.24741
6.19531	6.38045	6.90046	6.11577	8.08759	8.06003	7.74769	10.9275	11.292	11.008	10.6552	11.4233	9.11211	10.4114	10.5681	9.83316	9.23455	8.25836	8.34035	7.69689	8.72424	10.0256	9.34482	10.1159	10.1486	10.0375	10.0324
8.73545	9.39565	8.11922	7.62559	8.96658	8.39647	8.24795	8.89564	8.89789	9.55079	9.71391	9.43399	7.35669	9.19489	9.76486	9.10291	9.21219	7.09618	8.26268	5.45097	7.51564	7.52371	6.80101	7.97943	8.88761	8.7593	9.22196
9.94294	10.1283	9.57924	8.5998	10.2915	9.80548	9.80548	6.60411	7.22504	6.3653	7.74189	7.00056	6.60466	6.9311	6.1389	6.82194	6.91202	6.50959	6.4398	5.32483	6.21923	6.93294	5.55186	6.7836	7.5647	6.98799	7.77022
12.1577	11.8829	11.2632	11.0822	12.3449	12.1069	12.4891	11.1469	11.3144	11.8155	11.6794	11.3799	11.6707	11.1943	11.2392	11.0821	11.2815	9.9071	10.363	9.19301	9.8079	10.3777	9.76865	10.711	11.5481	11.2658	11.862
3.7256	3.7256	2.91822	3.7256	3.7256	3.7256	3.7256	2.13842	2.13842	2.13842	2.13842	2.13842	2.13842	2.13842	2.13842	2.13842	2.13842	2.01837	2.01837	2.01837	2.54211	2.55846	2.01855	2.07382	2.01837	2.01837	2.21225
9.84629	9.76499	9.97722	9.84829	9.31199	9.91906	9.45419	10.0633	9.62053	10.1216	10.2297	10.1208	8.72118	10.3181	10.5171	10.0697	9.82275	9.05673	9.20207	8.91916	9.20383	8.59428	8.65519	9.35503	9.89156	10.0631	9.97266
2.05099	2.05099	2.05099	2.05099	13.6366	2.05099	13.5673	12.2267	12.2165	11.7391	12.2979	12.1309	2.58335	12.135	1.43339	1.38228	1.82126	5.16268	5.16268	5.16268	5.16268	14.9969	7.74873	14.9996	8.78475	9.08809	15.4068
10.3102	10.2432	10.5881	10.8705	10.1856	10.5844	10.4949	8.42511	8.51975	9.13723	9.19456	8.70331	8.95752	8.70059	8.87271	8.36503	8.79564	8.48313	8.3622	8.11281	8.2444	7.10358	7.83278	8.75591	8.7083	9.31072	8.77287
4.09157	3.94525	4.63091	4.63091	6.1319	5.13314	4.45213	6.6714	7.31361	7.02549	7.15051	6.63011	6.39268	7.20541	7.6048	7.43311	7.37493	5.27283	5.67553	4.70067	4.26594	7.19173	5.08594	7.06786	7.54983	6.89656	5.81533
9.68485	9.43841	9.70154	9.67199	9.39458	9.44378	9.74244	9.60215	9.64242	8.81215	9.79779	9.84377	10.1101	9.83823	8.98181	9.58877	9.70735	10.8854	10.2712	9.53555	10.1324	10.6583	10.1113	9.93603	9.38425	9.14237	9.72792
8.48822	9.16225	8.85414	8.62245	9.7995	9.34696	9.69459	9.64393	9.73649	10.2666	9.72055	9.92489	9.47841	9.73649	10.0424	9.54495	9.47841	9.1212	9.4937	9.31587	9.67404	10.1496	9.6319	10.1244	9.98282	9.96676	10.0857
10.3905	10.5587	9.98879	10.1078	10.6846	10.5567	10.258	8.0768	8.61356	6.27516	8.6548	7.08444	7.83632	8.15768	7.89854	8.28455	8.37151	7.68563	8.73754	7.33894	7.63389	7.80926	7.41863	7.62508	8.16827	8.34445	8.47481
7.41458	7.17177	7.6131	7.16065	6.51871	7.27218	6.85647	7.61157	7.7898	6.2814	7.46469	6.84463	7.38026	7.06715	6.90182	6.90726	7.19655	7.7737	7.51171	7.08893	7.85903	6.63978	6.67451	7.06354	7.40103	8.08452	7.41226
10.891	11.1545	11.206	10.9411	9.5037	10.3762	9.9748	10.2093	10.6054	10.1559	10.7096	10.4802	10.975	10.719	10.3414	10.8057	10.6766	11.0534	10.7155	10.8227	10.4638	9.76105	10.0084	9.9655	10.5715	10.5179	10.3769
9.85456	10.0528	9.96577	9.5405	9.95354	9.89407	9.53832	7.43851	7.92883	7.17887	7.48278	5.08376	6.82942	7.46534	8.02065	7.4509	7.86097	6.55655	6.75891	7.44373	7.24871	5.59014	7.10974	7.27025	8.8779	8.25431	8.44979
10.1386	9.54158	10.0779	9.46965	8.79012	9.02164	8.47354	7.10266	8.32655	6.20398	7.8369	7.99929	8.38028	7.60877	8.0566	7.88272	8.32233	8.22099	7.03428	8.4672	7.62643	5.79779	7.14373	7.11874	8.56294	8.22665	8.31888
11.081	11.1174	11.209	10.9441	10.1301	10.641	10.4537	9.67562	9.53941	9.18854	8.9935	10.1507	10.2243	10.1022	10.3212	9.79903	9.59633	9.32588	9.42612	9.61638	9.25597	8.75003	9.01767	8.92478	10.0079	9.9112	9.49095
9.97647	10.5001	11.1476	11.306	9.81027	10.7939	10.4496	8.7457	8.89234	9.81086	9.88578	9.55764	10.0631	8.98615	10.2208	8.65351	9.98083	10.0857	10.431	11.1039	10.9076	10.5834	10.8212	10.4043	9.44528	9.31096	9.46635
11.1142	11.1526	11.5359	11.1142	10.7704	11.2699	11.0307	11.5171	11.8221	11.7363	11.6996	11.2837	11.7879	11.1261	11.8926	11.5769	11.551	11.591	11.4323	11.6344	10.5834	10.7048	11.4685	11.2313	11.5005	11.6908	10.2436
11.7348	12.0258	12.1252	11.8652	12.2824	12.798	12.4817	12.4247	12.0272	11.7453	12.1394	12.2619	12.8331	12.2252	11.7341	11.7169	11.7196	11.7091	11.8536	11.5393	11.7571	11.8411	12.1209	12.089	12.0689	12.2523	12.4962
10.2673	10.4446	9.6767	9.53883	10.9894	10.8908	10.3414	9.98216	10.749	10.9325	11.128	10.465	11.3895	10.7397	10.6926	11.6232	11.6629	10.6705	10.9038	11.0821	10.5684	11.7321	11.0468	10.6833	11.0097	11.2919	11.2491
13.6999	13.5195	13.3096	13.5994	13.1392	13.2961	13.2514	12.1505	12.177	11.9192	12.5238	12.4483	12.9925	12.6281	12.8326	12.7446	12.5387	12.5208	12.351	12.7112	12.486	11.9467	12.3376	11.8936	12.5565	12.4689	12.2057
11.2876	11.4892	9.72047	10.3248	9.92494	10.1911	9.93301	11.1197	11.1196	10.9417	11.377	10.6431	11.664	10.7742	9.84089	11.9016	11.6952	10.8864	10.1446	10.2604	10.4556	10.0591	10.1122	10.2715	11.3329	11.491	11.4486
11.458	11.7891	9.72365	10.6139	11.5163	11.089	10.6898	10.5962	10.7339	10.9132	10.9092	9.82323	11.4931	10.2063	9.1603	12.1086	11.9977	11.0046	10.3832	10.0613	10.3899	11.1342	10.4831	10.7206	11.4056	11.6851	11.7271
9.2429	9.29411	8.62068	8.28243	10.2118	9.91401	9.79075	6.77232	6.97072	4.04082	6.96447	4.51349	4.23668	6.89464	6.68179	6.50205	7.2466	6.47982	6.14469	4.75257	5.90463	5.86492	6.78842	7.24638	7.42439	8.09056	7.62413
12.4825	12.2189	12.3802	12.1222	11.9541	12.0875	12.0397	11.2169	11.0593	11.1095	11.1134	11.1101	11.2495	11.1681	11.5109	10.9431	11.1298	10.8435	11.0291	10.4075	10.6092	10.4373	10.5453	10.5452	11.4114	11.4652	11.015
9.42481	8.64202	8.59934	8.6008	7.82229	8.28544	8.70463	8.49272	8.75785	6.48768	8.54433	8.50835	9.65862	9.08748	9.25475	8.81893	8.90596	9.12596	8.48297	7.82188	8.34967	8.04742	7.60354	8.28836	9.2345	9.04036	8.99723
9.42483	9.61178	9.41809	9.41499	9.51107	9.50793	9.54814	9.24737	9.50236	9.71309	9.38939	9.62511	10.0071	9.50236	9.68703	9.47553	9.50236	9.92873	9.31106	10.0461	9.70294	10.2634	9.35011	9.64248	10.0419	9.76117	9.38341
10.3417	10.1706	10.6427	10.1169	10.7303	10.4679	11.0675	11.8738	11.5092	10.2004	10.7514	11.9082	11.407	11.2651	10.6751	10.5953	11.2234	10.9439	11.0954	10.6363	10.7551	11.5334	10.7329	10.7108	10.819	11.1335	11.2043
7.37861	7.48927	6.87489	7.17918	7.42353	6.91433	7.0289	9.26879	9.30378	9.16731	9.74332	8.80807	5.72457	9.29325	9.02689	9.13359	9.24777	8.76906	8.79158	8.26265	9.25259	9.45706	7.60863	8.40661	8.80279	8.78235	8.52647
10.4274	10.757	10.3539	10.4524	10.5164	10.3775	10.2413	9.7995	9.95586	10.3126	10.0634	9.8164	9.0424	9.52719	9.11997	9.75807	9.67209	9.75602	10.1093	9.96754	10.1862	10.1892	9.98357	10.0219	9.93165	9.72014	10.0762
10.7962	10.8944	10.6511	10.8395	10.7315	10.8395	10.8673	11.4514	11.6582	11.7117	11.9716	11.5466	12.0204	11.451	11.5909	11.6933	11.7878	11.2685	11.3437	11.6713	11.3091	10.7505	11.4968	11.5294	11.8756	11.7465	11.7295
10.4248	10.4211	9.92743	10.3665	10.6707	10.2717	10.2911	9.26497	8.45114	7.39786	7.96986	8.09523	9.90497	9.00348	8.64141	8.3566	8.99706	9.3609	9.87128	8.41715	9.54089	9.97966	9.46976	9.65335	9.35142	8.38009	8.98652
11.7524	11.6846	11.6846	12.0435	11.2103	11.4691	11.2843	9.88863	9.40638	9.14364	8.74522	9.51116	10.5379	9.80559	9.6903	9.13948	9.32615	9.93006	10.0135	10.0445	9.66858	9.59888	9.94695	9.93341	9.85836	10.1687	9.58829
7.74253	7.92064	7.22312	7.57543	8.9277	8.1645	8.17814	8.54768	8.70391	9.37383	9.09173	8.21355	7.719	8.88814	8.68697	8.14366	8.27643	7.94987	7.59078	7.98643	7.82338	8.97005	8.64486	8.79292	8.3978	8.29637	8.48102
13.6299	13.4009	13.7761	13.5846	13.0032	13.3795	13.0011	12.6634	12.6016	12.8622	12.8599	12.5213	13.0979	12.5796	12.617	12.4216	12.9891	13.1718	12.8823	12.9256	12.9313	12.6302	12.6552	12.7045	12.8465	12.8998	12.7784
10.405	9.95776	10.2662	10.2688	9.16862	9.63407	9.68552	10.1867	10.3457	9.83014	10.7888	10.4292	10.5438	10.3435	10.5084	10.2399	10.3888	11.7834	11.0746	10.449	11.5068	10.9856	10.9223	10.2978	9.87484	10.1788	10.3125
9.13938	8.98475	9.90461	9.29899	8.50388	8.70339	9.09223	8.40489	8.59466	6.9148	8.0825	8.95902	8.71284	8.3562	7.29551	8.0891	8.4879	8.1756	8.184	7.87304	8.44115	7.42722	7.31982	7.75835	7.11637	8.16278	7.70309
10.7677	10.8545	11.3357	10.6673	9.87076	10.466	10.4915	9.54922	9.65994	9.35254	9.47733	10.4239	9.90798	9.44817	9.5135	9.90639	9.51736	9.63812	9.59115	9.44419	9.2326	8.89503	9.00672	9.15664	9.10885	9.33379	9.15675
7.18093	6.52181	7.27583	6.11887	7.45994	6.80681	6.96236	3.63343	5.33813	3.70291	4.33567	3.42173	3.33146	3.77947	3.37588	4.50322	3.92968	2.78414	4.88252	2.65469	3.75265	4.37053	4.77584	4.07458	3.87575	3.38441	4.59894
6.73472	7.16729	7.3266	6.73673	5.88569	5.69453	6.52837	7.23509	7.72698	6.19758	7.14907	7.5415	7.0026	7.3396	6.62722	7.88383	7.8297	8.13675	7.84489	8.02596	7.7922	6.39829	7.09365	6.50444	6.96724	7.67893	6.32755
12.0768	11.8967	11.7614	12.2933	12.418	12.2871	12.1267	11.1225	11.692	11.1233	11.5722	11.6193	12.243	11.4041	11.6715	12.0392	12.15	12.1702	11.8101	11.8239	11.9193	11.7343	12.0323	11.8165	11.5195	11.4806	11.4035
10.1056	10.903	10.3512	10.6095	10.5691	10.3293	10.4145	8.13749	8.10672	8.10672	8.10672	7.81737	6.73846	7.50265	7.4415	7.97772	6.81985	8.22712	8.80231	7.20035	10.1529	7.69258	8.88064	9.0869	7.87709	7.58447	9.24011
10.5162	10.5234	10.4119	10.474	10.7967	10.6038	10.5162	10.2091	10.3177	5.79555	10.4691	9.04102	9.59126	10.312	9.5218	10.1103	10.1312	10.7976	10.0584	9.89061	10.79	8.86559	10.164	10.2958	10.2952	10.4057	10.7586
11.4091	11.6591	11.4778	11.6121	11.8461	11.6591	11.7667	11.6988	11.6481	11.4031	11.7432	11.9276	12.2095	11.7656	11.346	11.5305	11.5491	12.05	11.9361	11.5897	12.0278	12.0345	11.9043	11.8523	11.8391	11.8523	12.1914
10.6584	10.826	10.6571	10.7435	11.595	11.3547	11.4225	10.2796	10.1979	10.1828	10.5856	11.2163	11.3103	10.6469	10.8798	10.129	10.3671	10.9968	10.7403	10.3793	10.2475	11.1047	10.708	11.1294	10.4166	10.7409	10.5819
10.7839	10.7771	10.7771	10.7771	10.7771	10.8554	10.7771	12.506	12.671	11.8604	12.5571	11.6096	10.9176	11.7488	11.5923	12.2633	12.3404	11.6429	11.943	12.516	11.7403	12.2929	12.1059	11.7435	11.9783	12.1924	11.4828
10.9142	10.7491	10.3486	10.8538	11.9744	11.733	11.6999	11.211	11.46	9.71095	11.4767	10.1202	9.91308	10.8756	10.3334	11.4006	11.4226	10.9233	10.8791	10.9178	10.8932	11.2069	11.5087	11.4247	11.5611	11.4858	11.5408
9.18731	10.1336	11.0267	9.50082	8.44285	9.79789	10.0456	9.60018	9.26647	7.22016	8.99105	9.30917	9.43541	9.12754	8.87012	8.53973	8.42204	8.41838	6.96451	8.32447	6.30316	6.14923	7.03451	7.14058	8.26112	9.23382	8.17932
11.6305	12.2806	13.1494	11.7821	11.8799	12.4052	12.8204	11.6582	11.5948	12.2096	11.0299	12.2436	11.7513	11.7857	11.671	11.2133	11.1992	10.2613	10.3765	10.4016	10.2344	11.4648	10.4328	10.9003	10.9896	11.1792	10.9033
6.98899	7.31561	6.81927	7.74274	8.37837	8.72501	9.46218	8.63993	9.05034	8.75543	8.09118	8.77581	5.49028	8.41415	9.19142	8.50031	7.93323	7.12691	7.86334	7.5738	8.1069	8.56841	9.1508	9.16659	8.7633	8.94679	8.02394
7.50061	7.21284	7.42437	8.58601	7.85585	7.97751	7.85585	9.22401	9.49573	9.37837	9.73898	9.37325	9.35799	9.52937	9.94325	9.93059	10.0572	10.4869	9.89897	10.8543	10.0802	10.1459	10.1283	9.69771	8.66769	9.24628	8.60674
11.0734	11.2147	11.2386	10.7239	10.8268	11.1398	11.2678	11.6798	11.5385	11.6348	11.2372	11.9304	11.4916	11.4989	11.2064	11.1348	11.2456	11.6785	11.4545	11.3352	11.4452	11.3661	11.2812	11.5291	11.6457	11.5885	11.8694
10.6694	10.4694	12.2439	10.4172	10.7165	10.8463	12.0861	11.1321	11.0593	10.7851	9.78073	11.8082	11.013	11.1825	10.4432	10.2965	10.5061	9.71639	10.0708	9.66503	9.59403	11.1368	9.69715	9.92283	10.1425	10.2883	10.4362
8.83191	7.9737	7.99442	8.62293	9.34196	8.79096	8.32575	8.84842	8.83328	8.13051	10.1578	9.11271	10.2809	8.5524	9.66734	8.37584	8.42363	7.8723	8.10603	6.71052	8.04156	6.81539	8.17239	8.58836	9.19182	9.72247	8.16451
11.4024	11.3086	9.96088	10.5999	11.4585	10.8343	10.5275	11.215	10.9995	10.8459	11.4053	10.9418	11.2056	11.4672	11.3968	11.4201	11.6616	11.3726	11.9331	11.2556	11.461	11.5097	11.5232	11.7262	12.0682	11.7026	12.3021
12.6209	12.7803	11.7801	12.2791	12.3655	12.307	12.0068	11.5208	11.4906	11.3654	11.5999	11.51	12.3153	11.89	11.601	11.7304	12.0435	11.5739	12.0557	12.0097	11.9916	12.2405	12.1514	12.3095	12.4089	11.9369	12.4216
7.20373	8.57909	7.07631	7.25352	7.42882	7.49049	7.49049	5.97096	5.36573	5.97096	6.23409	6.03936	5.10064	6.0277	5.97096	6.60481	5.97096	6.4456	6.88992	6.72867	6.46449	5.4663	6.03411	6.27004	6.77092	6.82597	5.75247
11.0162	11.0313	12.7783	11.5225	10.7198	11.3851	11.7547	13.4958	13.5079	12.7856	12.1162	13.84	12.9245	13.1691	12.0904	12.3606	12.0217	12.0761	11.5746	11.5701	12.0971	12.5018	11.8062	11.8732	11.9679	12.55	12.0746
7.72988	6.65353	7.02995	7.67058	7.43308	7.34345	7.69706	8.72489	8.15886	8.11671	8.58798	8.67255	9.3345	8.61495	8.9594	8.39743	8.89653	8.58176	8.4265	9.51515	8.651	8.67326	9.22967	8.89172	7.57645	8.09817	8.54512
7.76796	7.86984	7.4402	7.63503	8.09403	7.76796	7.72102	6.28764	5.62493	5.30582	6.1238	5.62493	5.62493	6.46091	6.6648	6.66335	6.32852	6.27312	6.76375	7.07229	6.33647	6.56979	6.73757	6.25609	6.11811	5.9398	5.91783
9.83275	9.4477	9.57315	9.53378	10.9966	10.6756	11.137	11.3093	11.5052	11.5039	11.2013	11.889	11.1904	11.3807	10.9806	10.8541	11.0264	10.6089	10.9832	10.4359	10.7956	11.452	11.0702	11.2861	11.3816	11.0799	11.4739
9.69355	9.46393	9.51305	9.36294	9.5191	9.55481	9.6606	10.7267	9.2468	9.61783	8.98977	10.6166	10.4985	10.93	11.155	8.98426	9.90637	10.0868	10.4328	10.6137	9.36258	9.83204	10.6328	10.0049	10.0835	10.2905	9.3602
10.2229	9.80508	10.6041	10.5977	11.1198	11.1955	11.179	11.8975	11.5676	11.0517	11.4526	12.2898	10.9451	11.6779	11.1565	11.1243	10.7571	10.4426	11.776	9.74001	10.373	11.3842	10.4173	11.1296	10.7443	11.127	10.7458
10.397	10.7212	9.98722	10.3899	10.2863	10.075	10.0335	8.17373	8.19256	8.15433	8.24685	8.67962	9.18628	8.73112	9.12784	8.81817	7.90469	8.43979	8.52367	8.23707	8.65043	8.35814	8.08703	8.30852	8.54995	8.42774	8.47748
9.11135	8.69918	8.77569	9.26005	8.48203	8.57001	9.13918	9.44583	9.60998	8.72815	9.4194	10.0318	10.365	10.1679	10.6778	9.6019	9.48603	10.1941	10.3273	10.2839	10.2767	10.5415	9.92914	9.89457	9.67854	9.40663	9.65885
3.49337	3.99573	3.4323	3.30337	3.40501	3.39892	3.86386	5.73581	6.44342	2.36371	5.67438	4.83099	1.83412	6.30271	4.42218	5.78926	6.60393	8.21851	6.67272	4.78958	8.34468	4.72723	5.82288	5.9992	4.23095	3.64725	4.87301
12.4284	12.516	12.6251	12.4759	11.6893	12.0665	12.0332	11.2454	11.3018	11.2233	11.3235	11.5799	11.2981	11.2934	11.0461	11.1307	11.0421	11.6161	10.8666	11.4497	11.4184	11.2173	11.3408	11.3479	11.2014	11.0297	11.1589
11.3532	11.3599	11.2318	11.258	11.5376	11.4039	11.4651	12.4965	12.4235	12.0017	12.2841	12.6167	12.7033	12.6764	12.4336	12.5939	12.3815	12.1339	12.307	12.2205	12.1298	12.3859	12.2545	12.4588	12.5423	12.5505	12.8775
12.0665	11.6997	12.2682	11.9122	10.8468	11.4047	11.0696	11.851	11.5944	11.9731	11.7181	11.8037	12.5796	12.0464	11.0928	11.8925	11.7621	12.293	11.7446	12.0258	12.3759	11.5898	11.6952	11.5604	12.2175	12.0381	11.6423
11.1624	11.1624	11.6607	11.3679	10.7476	11.1221	11.0273	10.3387	10.082	10.104	10.8976	10.9633	11.092	10.9046	11.4002	10.6685	10.9524	10.7016	10.7685	9.87011	11.1027	10.5601	10.5913	10.8783	10.9383	10.7647	10.9232
4.49373	4.49373	4.37902	3.86084	4.78033	4.85152	4.49373	5.5983	4.92803	4.32972	4.23969	5.02197	4.65911	5.22302	5.61056	4.23969	5.78575	4.39903	5.0769	5.14717	3.38725	4.27938	5.29646	4.73891	4.6866	5.25799	4.65718
8.4561	8.30813	8.3925	8.76265	9.34032	9.14678	9.1638	8.38248	8.67491	9.42917	8.26534	8.87079	8.90541	8.41883	8.92518	8.24832	8.47324	7.86181	7.84839	7.86181	8.33349	8.16366	8.23271	8.36488	8.74178	8.69084	9.05239
2.05551	2.05551	2.05551	2.05551	2.4374	2.05551	2.05551	4.56175	4.5943	2.166	4.47378	2.05016	1.65824	4.3482	3.90702	4.1316	3.90702	3.94553	3.78099	3.93042	3.85581	4.01511	3.97088	4.01609	4.07853	4.02892	4.01511
10.3834	10.3574	10.4042	10.3174	9.42866	9.52766	9.48196	9.96235	10.0589	9.81499	10.2978	10.2625	10.4429	10.2417	9.93167	10.7166	10.3285	11.1895	10.1761	10.8683	10.3886	10.0418	10.367	9.86022	9.84949	10.1238	9.9497
6.35564	7.19951	7.98414	7.83141	6.44913	6.44468	6.89784	4.39641	4.39641	6.51016	4.39641	4.39641	4.39641	4.39641	4.39641	4.39641	4.39641	5.40795	6.1025	4.42902	5.15467	5.19768	4.45797	5.87186	4.23664	4.60507	2.94249
11.1772	10.6129	9.6392	9.93775	11.1304	10.8949	10.4543	10.4357	10.2604	8.76769	9.95523	7.26509	7.66119	11.3462	10.5409	10.4179	10.7902	9.42448	8.91903	7.4899	9.16983	7.77082	8.83189	10.0508	11.038	10.3301	11.2231
10.2979	10.3444	9.27664	9.11787	9.99211	9.55281	9.34437	8.81992	9.89158	8.83277	9.86609	9.01616	10.3247	9.43856	9.13905	9.55682	10.0153	8.67079	8.7222	7.5306	8.40688	8.87214	8.09374	8.70988	9.9793	9.42443	9.66385
8.31066	8.62463	8.04007	8.20601	8.13238	8.30377	7.70789	8.8288	9.74608	9.40607	10.1986	9.71034	10.3617	9.50739	9.4649	10.0526	10.0683	9.82948	9.42098	9.62076	9.32359	9.28407	9.09611	9.07067	9.49831	9.4322	9.34632
11.2261	11.1455	11.1003	11.0205	9.66762	10.3995	10.3305	8.51921	8.66563	8.38236	8.68008	8.38236	9.30236	9.00395	8.41752	9.15814	9.59996	10.2827	9.62433	10.5122	9.89109	7.92594	9.50467	9.68223	9.62511	10.2031	9.76696
12.7801	12.8088	12.7103	12.6373	12.1108	12.3848	12.2537	11.4684	11.2973	11.6059	11.3315	11.6173	11.8341	11.5038	11.6632	11.4314	11.6375	11.5367	11.5724	11.824	11.6727	11.0874	11.3794	11.4069	11.6148	11.5739	11.4527
8.3256	8.29221	7.462	7.74128	8.14162	8.51551	8.14292	7.15343	7.56318	5.16413	8.55421	6.87072	7.8296	8.44187	6.54939	8.27907	8.11091	7.16065	6.75982	8.1824	7.01179	6.75777	7.40851	7.15153	7.60714	8.12629	8.01572
12.0349	12.0047	12.2081	11.8987	11.7492	12.1351	12.0047	11.3235	11.5465	11.6443	11.8712	11.6581	11.6553	11.7257	11.3366	11.5932	11.6203	11.0391	11.0633	12.0189	11.0397	10.9645	11.1229	10.8021	10.9553	11.5555	10.9895
10.2902	10.6913	10.1418	10.1922	9.57135	10.1316	9.86169	9.81995	10.2108	10.2478	10.3669	10.4425	10.2956	10.3857	10.1516	10.2636	10.4015	9.74642	9.73878	10.5714	9.2644	9.18695	9.27399	9.04785	10.2456	9.46926	9.97545
11.5366	11.5976	11.3761	11.328	11.3895	11.415	10.9902	11.6718	11.5891	11.3044	11.8197	12.3308	12.3954	11.8056	11.7199	11.8422	11.8009	12.648	12.413	11.6952	12.3058	11.8522	11.943	11.8368	12.1538	12.5399	12.5231
3.33782	3.85886	3.44913	3.33782	3.32971	3.33782	3.33782	3.99161	5.61646	2.20969	5.28137	3.96342	5.81921	4.94847	4.05804	5.39413	5.09202	7.10685	5.07798	5.46326	6.93755	6.65722	5.96338	5.09691	4.18788	4.40052	4.47532
11.8224	11.8955	11.8224	12.0002	11.5824	11.7464	11.6386	12.1886	12.2489	11.4133	12.0001	12.2772	12.459	12.3211	12.5879	12.2429	11.8569	12.3653	12.3498	12.4616	12.3114	12.2259	12.2295	12.1726	12.6212	12.3492	12.3253
12.8771	12.918	13.1203	12.7196	12.3164	12.3952	12.3073	12.7771	12.7284	12.8899	12.6446	12.9049	13.1058	12.7411	12.9276	12.759	12.9393	13.2017	12.9427	13.0274	12.9946	13.0095	12.8712	12.5924	12.6464	13.032	12.8864
10.0726	9.37988	8.96779	10.0726	10.5831	10.1121	10.1615	9.94405	9.6058	9.80877	9.72701	9.08311	10.3435	9.93512	9.74761	10.051	10.298	10.0234	9.7247	9.27881	9.96812	10.2022	10.1156	10.1936	10.1153	10.1955	10.2341
10.4261	10.0437	9.92164	9.39383	9.43629	9.53697	9.32118	7.93988	7.45457	5.59111	5.50171	4.62908	4.71131	6.31979	7.5746	7.00082	7.2229	6.40893	6.0298	6.82465	6.14877	4.57423	6.11327	6.49992	6.9089	6.30874	6.58636
12.3568	12.5478	12.2423	12.5145	12.171	12.1632	12.0574	10.2816	10.2263	9.88634	10.9712	10.6603	11.0127	10.694	11.1354	10.539	10.5162	10.0346	10.3488	10.7216	10.5569	10.3148	10.2266	10.434	10.3414	10.249	10.4838
9.69262	8.7163	9.08209	9.92447	9.33349	9.43289	9.57565	8.81671	9.14238	8.31847	9.52926	9.08542	9.33924	9.07644	9.74118	9.03004	9.09552	8.8028	9.07705	10.4854	8.82137	9.37692	9.44926	8.79338	7.75979	8.66609	8.18162
9.81736	9.75365	10.1147	10.31	10.1643	9.97852	9.98311	11.4385	10.9445	11.1199	10.9842	11.3353	11.3881	11.1358	10.7659	10.3273	10.7343	11.7181	11.5525	12.0643	12.005	11.4704	12.0489	11.3475	10.5353	10.6385	10.6043
10.1709	10.3829	10.3966	9.94038	10.2585	10.0594	10.8603	8.24086	8.45615	8.73825	8.58409	8.67908	8.84501	8.57103	9.52755	8.2819	8.54652	8.06	8.27873	8.28349	8.32857	8.32502	7.96489	8.99167	8.50648	8.38476	8.38499
10.8086	10.9414	11.2481	10.6657	11.4759	11.2598	12.103	11.843	11.8801	12.0703	11.6252	12.4708	11.9455	11.6713	12.0246	11.3017	11.4696	11.4585	11.3747	11.2944	11.4865	12.0358	11.5551	12.3552	11.9606	11.6593	11.9404
2.09945	2.4281	2.09945	2.09945	2.19496	2.09945	2.09945	2.06894	2.05769	2.05769	2.05769	2.05769	2.05769	2.05769	2.05769	2.05769	2.05769	2.15291	2.15291	2.15291	2.20923	2.41047	2.15633	2.15291	2.15291	2.15291	2.15291
8.6665	9.35175	11.743	9.92834	10.7772	11.3007	12.6272	11.6056	11.3407	10.6287	9.36271	12.4801	11.1513	9.84561	8.3259	8.77927	8.77927	9.67268	9.51349	8.8505	9.5306	10.926	9.49491	10.0059	8.81087	9.25674	8.73404
11.3244	11.4232	11.6715	11.5688	11.6437	11.5688	11.9209	10.963	11.0014	9.88358	10.8952	10.232	9.11315	10.5548	9.89787	10.4198	10.5178	11.0794	10.8681	10.5856	10.9942	11.0018	10.7876	10.7305	10.3477	10.2982	10.84
6.37823	7.27317	7.22693	7.2962	7.83649	7.8033	8.03025	9.3077	9.28925	8.97498	10.1383	9.38619	6.86841	8.49855	8.55995	8.96515	8.18422	8.15136	8.88825	6.65443	9.73458	10.2979	9.2281	9.40493	9.96893	9.75777	9.61534
10.4788	10.5357	11.0787	10.6618	9.26673	9.78218	9.8575	11.1286	10.9207	9.81283	11.0154	11.0949	11.8644	10.8682	10.9636	11.1028	10.9365	11.6674	10.9644	11.2446	11.4445	10.0112	10.8895	10.7187	10.9174	10.4996	10.8899
7.34393	6.56205	7.45405	7.5077	5.77261	6.80461	5.84891	8.45104	9.20871	8.12888	9.14675	8.54272	9.7634	9.14164	10.0657	10.3228	10.2037	9.99564	9.63017	10.1454	9.85064	7.31205	8.77481	9.12601	8.41114	9.1139	7.59612
7.02246	5.89295	6.18158	6.77739	5.71875	6.18158	5.0819	3.69595	4.98694	3.4575	5.33949	4.11437	7.00001	5.17154	5.29553	6.37249	6.15432	6.78057	6.63748	6.83752	6.78139	3.01939	5.86106	6.289	5.40482	5.56232	5.13909
2.47725	2.58263	2.2102	2.85397	4.30304	3.69141	4.15876	5.95492	6.38235	7.42867	6.70926	6.09605	5.68933	5.95492	6.95011	6.85823	7.48225	6.4451	6.2578	6.35457	5.78714	7.3222	6.12456	5.96848	6.80615	5.20829	6.16939
9.7718	10.1038	9.66632	9.7718	9.75572	9.7718	9.93887	9.12281	9.43178	9.32699	9.84293	9.48178	9.76983	9.76452	9.2988	9.09668	9.71277	9.91415	9.55268	9.30246	9.52989	9.92296	9.44855	9.7473	9.42854	9.38675	9.80383
13.0324	12.8524	13.0216	12.8616	12.1375	12.4371	12.1888	11.8525	11.8088	11.4114	12.0611	11.8353	12.5399	11.8129	11.7828	12.1604	12.1148	12.1802	12.2489	11.9748	12.3795	11.5656	11.8823	11.8072	12.0732	12.0004	11.9205
8.45627	8.02845	7.4374	8.02845	8.77476	8.20835	7.86936	7.95991	8.28958	7.91234	8.84	8.21419	9.29376	8.43886	8.4935	9.09536	9.26146	8.91919	8.58279	8.44155	7.94064	8.45417	8.296	7.90337	8.5049	8.96919	8.11624
10.3927	10.1493	10.0307	10.3347	10.1489	10.1493	9.42524	7.53216	7.79604	7.88507	6.91373	6.51483	9.02301	7.90171	8.27684	8.88104	8.76948	8.52743	7.88141	8.45058	8.90871	7.7055	8.39817	8.04738	8.22313	8.5916	8.21642
5.29206	6.0197	5.23672	5.40602	6.31723	5.64218	5.29148	4.16278	4.94683	4.32023	4.54042	3.63196	3.63196	4.61851	4.57801	5.20908	5.27507	3.26027	4.23226	5.55049	3.91868	4.63581	4.36996	4.36996	4.45541	4.36996	4.37734
4.08778	3.935	4.13955	3.3067	3.96576	4.2632	3.96576	2.17771	2.17771	2.17771	2.17771	2.17771	2.17771	2.17771	2.31413	2.17771	2.17771	2.07996	1.99549	2.04033	2.03005	1.99549	2.78606	1.99549	2.35701	2.21822	2.12213
7.80753	7.0835	10.9896	10.4976	8.11714	9.65465	9.23912	8.85135	8.61493	8.56092	8.87699	9.29448	8.74734	8.07909	8.74904	8.32477	8.89857	8.39805	8.2706	9.25203	9.02071	7.75271	8.70471	8.59771	6.30375	8.333	8.87644
9.24639	9.09009	8.82533	9.78622	10.5957	10.6568	10.4339	9.71809	10.1859	10.6162	9.95628	10.1963	9.95138	9.54797	10.2006	10.3257	9.49043	7.64146	8.48476	7.79973	8.93222	9.94181	9.31237	9.7124	8.99423	9.45132	9.3578
3.57384	5.31168	7.54676	9.91969	10.479	9.65957	9.41703	2.67355	5.86072	8.3566	3.78716	6.16788	3.26281	3.63874	2.64177	2.53645	2.67355	2.60463	2.70938	8.84043	10.736	10.6805	8.20245	12.4433	3.10303	3.35648	2.60463
3.41569	3.41569	3.41034	3.41569	4.64622	3.15163	2.9265	3.02663	4.29046	2.43961	4.84157	3.02663	3.1647	4.11997	2.98506	3.95375	4.78896	4.24057	3.12793	4.28151	3.62368	4.44633	4.26108	2.81117	3.28433	3.50272	4.19559
11.3288	11.1856	10.9661	10.8239	10.5305	10.4002	10.0804	11.0455	11.0917	11.1384	11.3939	11.0334	11.4133	11.4156	10.9949	11.3402	11.4435	10.7952	10.7012	10.2905	10.4849	9.94911	9.68999	10.1169	11.0786	11.4494	11.307
13.112	13.2817	12.42	12.9016	13.4085	12.8709	13.2177	13.2673	13.3782	12.9256	13.5761	13.0998	13.818	13.4975	13.5568	13.517	13.5416	13.3249	13.3439	13.3112	13.0566	12.8343	12.9782	12.9844	13.4648	13.5127	13.4061
8.63258	8.64435	6.87132	7.6451	10.5449	9.9905	8.30411	8.6886	9.27842	8.94216	9.3134	7.43342	8.42526	9.33618	8.89832	9.36808	9.37179	7.29667	7.12892	6.67974	7.83957	8.90985	9.28668	8.94401	9.20113	9.52333	10.1818
7.99857	8.12344	8.72406	8.17611	9.49042	9.09953	8.84749	10.2458	10.1804	10.7434	10.3576	10.5461	10.2663	10.6874	11.1079	10.7931	10.4974	8.61057	8.52444	8.20846	9.20964	9.54621	9.43784	9.431	10.7366	10.0085	10.7078
6.59447	7.50519	6.32343	6.59804	7.48197	6.97405	7.46677	8.72885	8.84373	8.91554	8.70537	6.83762	1.94633	8.40281	7.75375	8.53549	8.48607	7.79315	7.00884	6.46062	7.32532	9.37753	8.52425	8.4341	7.83926	7.46274	8.16103
5.88316	6.71135	8.11334	6.8024	7.82974	7.82415	8.4792	9.1863	8.64652	8.01808	7.08561	9.03366	6.30367	7.53774	7.31037	6.87515	6.64066	7.00635	6.47559	7.15948	7.02176	8.08812	7.4385	7.46386	7.15948	7.09025	7.16018
10.2564	10.2627	10.9613	10.2564	9.65918	9.95501	10.3411	11.7804	11.833	10.7749	11.2721	12.2219	11.8927	11.3599	11.7284	11.6679	11.5072	11.3116	11.1047	11.2782	11.1484	10.8753	10.9877	11.1219	11.2297	11.5338	11.1324
7.86592	7.95278	7.91903	8.20523	7.86592	7.73912	7.37617	7.98615	8.43179	9.03351	8.71462	8.68217	8.43179	8.43179	8.87271	8.43179	8.8804	8.11331	8.72484	8.63729	8.7457	9.20336	8.11452	8.60081	8.40838	8.01453	8.19141
14.2553	14.358	14.3213	14.2372	14.3812	14.3213	14.3213	10.8302	10.4471	12.8607	10.7088	10.4877	10.8912	12.1794	12.0912	12.0913	12.0769	12.1064	12.0044	12.6202	12.1957	12.6265	12.4076	12.7483	12.7697	12.752	12.6576
6.45124	6.19679	6.48279	6.4402	6.39322	6.0512	7.04184	7.60483	7.49476	9.56006	7.46819	8.17698	6.25172	7.4354	5.93732	7.00725	7.04191	6.98227	6.88393	7.07076	7.49028	8.49463	6.30468	7.05023	6.65063	6.82784	6.8408
13.5667	13.6694	13.4465	13.3037	13.4335	13.5546	13.2875	11.3794	11.7627	12.4469	11.8194	12.1503	12.0825	11.7379	11.4813	11.4098	11.5745	11.8072	11.8521	11.4095	11.7584	11.8541	11.8366	11.6078	11.5799	11.3755	11.6341
9.34476	8.84437	8.43455	8.63268	9.63144	9.16063	9.50844	9.04071	8.75818	9.37592	8.43289	9.31866	9.61072	9.26643	9.96141	8.43669	8.83908	7.47267	8.4876	8.65221	7.91005	8.43966	8.43805	8.86513	9.14023	9.08341	9.40025
10.1323	10.3237	10.6311	10.4171	9.00366	9.76989	9.89351	10.5175	10.6858	9.7433	10.1099	10.4015	11.2324	10.6795	10.0404	10.6201	10.6853	10.8664	10.3074	10.4439	10.8311	9.63038	10.272	10.5388	10.8979	11.0953	11.0207
9.49202	9.8337	9.39522	9.32321	8.44011	8.9889	9.09695	9.93436	10.1019	10.2076	9.30227	10.3134	10.6782	9.6567	9.80877	9.98754	9.72714	9.62698	9.20925	9.28186	9.28186	8.60154	8.77026	9.28186	9.71057	9.56946	9.47346
5.49666	5.17058	4.56949	4.66981	6.8253	5.17058	5.17058	5.0174	5.41568	3.21639	4.47775	3.31886	2.19685	4.33385	6.06764	4.84001	4.065	3.08324	3.21267	2.82554	3.78479	3.66187	3.14096	4.97045	3.70454	4.66145	3.6879
8.26724	7.53373	7.29453	7.34707	9.06669	7.97339	7.62195	8.01385	8.4926	5.24293	8.58496	6.1937	2.67484	8.68606	9.26052	8.17403	7.85098	7.70291	7.24605	4.71703	7.77178	7.09176	5.34872	8.61725	7.34709	7.76204	7.70308
12.2339	11.5305	12.0274	12.1987	11.5702	11.7917	12.0805	11.5671	11.6989	11.06	12.1952	11.4101	10.9253	12.0144	12.9516	11.7518	11.4626	11.2635	10.399	10.3414	11.3692	10.1012	9.26515	11.63	11.0906	11.6071	10.7361
13.2931	13.3635	13.3752	13.2995	12.8385	13.1998	13.1445	11.811	11.7507	12.4134	11.9184	12.3749	12.4528	12.289	12.3592	12.2773	12.5167	12.3252	12.239	12.561	12.3656	11.9848	12.2763	12.2391	12.2665	12.2585	12.2538
8.8255	9.34163	8.7014	8.99421	10.2524	9.51087	9.49194	9.9499	9.83172	10.3843	9.98474	10.3582	9.81374	9.99003	9.74963	9.73469	9.40292	8.71813	9.52354	8.55173	9.09453	10.0047	9.53928	9.55444	9.47553	9.45512	9.90099
9.06956	9.09305	8.45288	8.69412	9.47149	8.44071	9.06734	7.77361	8.04007	8.77322	8.29337	8.15701	8.91044	8.4356	8.89813	8.40392	8.92084	8.34699	8.35401	8.37454	8.13816	8.94696	8.19567	8.36514	8.94957	8.74812	7.63202
7.72355	7.8658	7.44139	7.93475	9.73158	9.31217	9.13204	10.3772	10.2378	10.9915	10.3666	10.6186	10.3494	9.70597	9.24434	9.79073	9.89837	9.08334	9.14481	9.2489	9.24524	10.4537	9.90028	10.2022	9.8902	9.94932	10.1308
10.157	10.3591	10.0248	10.0336	10.5502	10.2289	10.6082	10.8885	10.7335	11.4365	10.8981	11.3039	10.7606	11.0564	10.9352	10.5388	10.7111	10.8113	10.6096	10.2791	10.6841	11.1073	10.8464	10.8671	11.0409	10.8499	10.9383
11.4214	11.1227	11.8556	11.475	10.6436	11.261	11.6776	10.7963	11.1837	9.85585	10.8175	11.1843	11.0979	10.6303	10.7265	10.8691	11.0257	11.0114	10.6286	11.0621	10.7704	10.3735	9.73511	10.3354	10.5223	9.98762	10.1825
2.38156	2.38156	2.38156	2.38156	2.90739	2.38156	2.40377	3.39915	3.96105	3.20951	4.17089	3.20951	1.94035	3.48632	3.20951	3.20951	3.20951	2.87181	2.86265	3.60138	2.87144	2.67921	2.87934	2.87173	2.77812	3.23598	3.60138
4.09902	2.69822	3.29924	3.82101	5.44363	4.02082	3.82101	2.21431	2.41268	2.21431	2.21431	2.21431	2.13341	2.22948	2.21431	2.21431	2.21431	2.12432	2.63181	2.04944	2.03252	2.00034	2.05352	2.03252	3.20893	2.63286	2.03252
5.47916	5.81175	5.40402	6.2229	6.54279	5.71856	5.81175	8.02485	8.32146	8.20052	9.041	7.6089	6.41257	8.83468	9.01135	8.76803	8.79349	6.92677	7.74512	7.79163	7.22553	7.78295	7.18379	7.82283	8.06433	7.65108	7.36963
12.7663	12.9075	12.9078	13.2291	12.6866	12.7425	12.7933	9.96683	9.7162	11.0257	10.1906	10.8531	9.71365	9.7162	10.849	10.455	10.7269	10.1886	10.1523	10.6679	10.0858	9.51076	9.99068	10.1478	10.5451	10.3562	9.96354
8.59882	8.65766	8.50268	8.59882	8.59882	8.53087	8.7531	7.37138	7.71627	7.84724	7.94953	7.62594	8.36988	7.96858	8.65248	8.06103	8.42519	8.27442	8.08159	8.4789	8.20843	8.74337	7.85814	7.36711	8.40226	7.68554	8.65651
10.204	10.0813	10.1643	10.4629	9.15691	10.0343	9.65205	9.16739	8.96387	8.66277	9.17154	9.10047	9.61442	9.14589	8.94655	9.08429	9.0007	9.2094	9.06257	9.56234	9.44737	8.67447	9.00735	8.95171	8.84429	8.80737	8.90217
10.2044	9.89469	9.9593	10.0464	8.86165	9.40614	9.259	9.04318	8.97726	8.92293	9.06685	9.45816	9.86702	9.4329	9.81398	9.38926	9.44673	9.5381	9.31253	9.58138	9.23213	7.87212	8.64183	8.82636	8.67566	8.98744	9.15082
11.1184	11.0231	11.3591	11.038	10.5641	10.4548	10.9876	10.8885	10.8633	10.8914	10.931	10.7313	11.4434	10.7313	10.3558	10.7117	10.7313	10.0598	9.62058	9.8406	9.58658	9.38799	9.05079	9.97736	11.104	10.8017	11.6
12.5038	12.4038	11.8664	11.8359	12.4807	12.2039	12.0473	11.6723	11.9528	10.574	11.8362	11.2003	11.687	12.2186	10.9863	12.1914	12.0491	11.5589	11.4062	10.0542	11.0594	11.5001	11.006	11.2678	12.3658	11.9667	12.1042
11.6636	11.6636	10.9107	11.109	12.4537	11.9601	12.2584	12.1577	11.9284	12.0702	12.1285	12.4777	13.0138	12.6736	12.5644	12.4624	12.4989	10.3967	10.0641	8.59102	9.90779	10.5615	10.0774	10.6413	12.3689	11.9811	12.5355
9.70587	9.80375	9.52303	9.90524	9.13937	9.34522	9.36401	8.64698	8.7646	8.53988	9.11323	8.71279	9.48263	9.09441	8.68824	8.90217	9.07593	9.21645	9.60339	9.39527	9.56415	8.67773	8.88936	8.9824	8.22292	8.62912	8.79717
8.82488	8.69668	8.63456	8.53157	8.36763	8.23648	8.36763	6.75658	6.7138	6.63709	7.56418	6.55518	7.56851	7.26445	7.53222	7.48733	7.75616	7.50676	7.50102	7.45658	7.20023	7.3993	7.34882	8.00197	7.00103	7.17802	7.5024
10.0801	9.48668	9.43496	8.76959	9.14898	9.29941	9.51214	6.77819	6.77819	10.132	7.3269	7.22585	7.82775	7.93695	7.8107	7.79572	8.22668	7.54371	7.45018	7.03705	6.33379	6.51028	7.73966	7.61143	8.25618	7.15092	7.9366
10.0587	9.96807	10.0878	9.99722	9.96384	10.2727	10.3685	7.009	7.32097	4.64	7.78401	6.87364	7.56472	7.47155	5.85371	7.24627	7.42116	7.0659	7.48708	7.98907	7.60371	5.59689	7.91713	8.01465	8.39868	7.79853	8.34477
5.52004	5.74949	5.75078	5.43401	5.32247	5.6968	5.54418	8.97478	8.97478	9.27991	9.35426	9.39862	9.12605	8.97478	8.20819	8.97478	8.79621	8.65981	9.90959	8.68751	8.6856	8.63993	8.63918	9.59392	8.63935	8.98683	8.6736
8.86985	8.49421	9.01972	8.72434	7.6848	8.66871	8.63521	10.229	10.2831	9.75222	10.4066	10.3036	10.9582	10.4625	10.2218	10.571	10.675	10.5155	10.7208	10.4956	10.3925	10.1914	10.4825	10.5178	10.6783	10.2657	10.5019
12.1889	11.8728	11.8728	11.954	11.3321	11.9602	11.7459	10.5749	10.8275	10.7401	11.293	10.9917	11.4307	10.7336	11.1714	11.2257	11.1265	11.2422	11.5371	11.672	11.2165	10.792	11.1478	11.2376	11.8279	11.4647	11.4587
5.7361	5.6011	5.67131	5.27631	5.67131	5.75469	5.67131	4.07943	4.98816	3.06648	3.90805	2.53199	3.06648	4.56404	3.8611	4.98816	6.36234	4.02306	3.91405	6.60238	3.84992	3.01668	5.11584	4.58214	5.61455	5.19001	5.19696
5.90908	6.95295	8.10663	5.90908	5.37406	5.60296	5.52608	3.3457	3.5939	3.54221	4.31404	3.53994	3.60586	3.54221	3.42787	3.84594	3.57716	5.02176	5.22513	7.53629	4.784	6.50261	5.58429	4.84544	3.68198	4.46682	2.77074
2.31181	2.31181	2.31181	3.14888	2.31181	2.31181	2.28199	3.47825	2.515	2.4582	2.48096	2.48096	2.13138	2.48096	2.48096	2.48096	2.63566	2.85725	2.28277	2.44008	2.85725	2.34081	2.15281	2.28277	2.73513	2.28277	2.51211
8.99134	8.77119	10.1526	9.64525	7.99837	8.99134	8.52058	10.5229	10.4915	10.6356	10.2269	10.8349	10.8345	10.3439	10.7818	10.2391	9.99898	10.6611	9.79481	10.3999	10.2106	9.72315	9.69956	9.77252	10.1397	9.99197	9.78267
3.45868	3.76814	4.98288	3.97178	4.41324	3.97178	4.31501	4.91018	5.54627	4.08765	4.23109	4.18289	3.74057	5.32122	4.7237	4.91018	4.91018	6.73789	5.42284	3.0596	7.20027	5.60384	7.48123	6.71984	5.61533	5.85283	5.92259
4.28003	4.5665	6.29593	4.66771	4.50184	4.51165	4.92536	8.2319	8.3982	7.37063	8.27512	9.09582	9.2483	9.33304	7.20982	6.25094	7.11012	9.55777	7.60347	7.63412	9.48931	10.3934	9.45369	8.41247	8.23201	8.45436	7.90408
9.11613	9.40995	10.8549	9.96726	8.65422	9.34191	9.69444	9.85264	9.81412	7.91193	9.92959	9.42105	9.36359	9.63862	9.61505	9.55452	9.59916	10.4739	10.3784	10.8953	11.1175	10.8248	11.0053	10.3133	9.23674	9.45801	9.22122
9.3738	10.0333	10.736	9.90546	9.66902	10.0903	10.7419	8.85363	8.54481	8.12685	8.75983	8.97289	8.81562	8.6593	9.0513	8.70576	8.69492	9.57071	9.65987	9.93162	9.90502	9.62834	9.25923	9.59566	9.38885	9.23913	8.68299
13.3156	13.2601	12.7002	12.6235	13.0641	13.0462	13.1061	11.9601	12.4874	11.4333	12.5126	11.3748	8.92532	12.1319	12.666	12.5466	12.3748	11.5609	10.8059	10.5961	11.6002	10.3903	10.929	11.8356	12.8848	13.1603	12.3815
6.52627	5.58807	5.79008	5.58807	5.58807	5.48033	5.36028	5.40356	5.40356	5.40356	5.38604	6.01841	5.40356	5.40356	5.1952	5.36947	5.37997	7.34072	5.45023	6.68365	5.42688	6.1423	5.45658	5.99688	5.91311	6.08319	5.85919
11.4422	10.7497	10.3265	11.2196	9.96399	10.3981	10.1274	10.3902	10.3596	10.0438	10.4094	9.19061	10.6224	10.0106	9.71268	10.8382	10.5189	10.1723	10.0032	10.2726	10.2169	8.48895	9.86159	9.40616	9.84951	9.95219	9.88969
11.9274	11.974	11.4164	12.0882	12.5652	12.3213	12.0882	10.5315	10.7955	11.2253	10.97	10.8218	11.0037	10.7509	11.0532	11.3167	11.0054	10.7198	10.6694	10.7186	10.8843	11.2205	11.3099	10.9074	11.0245	10.4908	10.9106
8.59327	9.19558	8.08167	9.59669	9.43875	10.2105	9.07476	9.41759	10.8754	10.7269	10.9017	9.93106	9.29896	10.0941	10.4105	11.3725	11.0098	9.85637	10.4993	10.0837	10.4975	10.0975	10.2157	10.6356	10.3432	10.5201	10.3241
9.97726	9.35455	9.525	9.97164	8.04549	9.08296	9.57476	10.7497	10.5193	10.8138	10.1155	10.4737	10.82	10.6358	11.0546	10.568	10.8154	11.1786	10.7338	11.1068	11.0095	10.6929	10.7724	10.8834	10.4537	10.4173	10.6046
10.5686	10.5926	10.8403	10.559	11.1835	10.9206	11.1855	11.9169	11.6779	11.8759	11.6057	12.3403	11.5945	11.3739	11.4697	10.9908	11.0384	11.2064	11.2921	10.9153	11.3528	11.3394	11.1933	11.4372	11.3597	11.3293	11.3639
11.0693	11.2017	10.8937	10.88	11.5429	11.4194	11.59	9.78891	9.95867	9.11495	9.92066	10.0198	10.2566	9.63062	9.18174	9.75261	10.0131	9.65066	10.1952	9.14799	9.85943	10.2891	9.86137	10.0274	10.2102	9.67847	10.4299
12.522	12.4391	11.999	12.3414	12.1463	12.0161	11.9123	9.17751	9.08209	7.64346	9.68208	9.51754	10.5909	9.13424	9.98408	9.07374	9.6476	9.62294	9.75652	9.40102	9.79766	8.67498	9.49063	9.38735	9.62318	9.70228	9.53168
11.5506	11.3971	10.9693	11.405	11.3523	11.4573	11.2705	10.6192	10.6421	10.3015	10.9903	10.8264	11.5658	10.5761	11.5861	10.518	10.9269	10.286	10.5298	10.1403	10.5309	9.57831	10.433	10.2377	10.8211	11.0486	10.7511
12.9087	13.5377	13.1218	13.3847	12.816	13.1014	13.1014	11.7072	11.6837	12.2848	12.1185	11.616	10.6038	12.0132	11.4129	11.7384	11.9215	12.5456	12.686	13.3077	13.0519	12.6111	12.7331	12.3657	12.3162	12.3871	12.4859
9.45278	8.95113	8.6117	8.6776	8.51769	8.08974	7.85852	5.66414	5.66414	5.73642	5.61051	3.96518	4.21052	5.66414	5.61051	5.83833	5.5818	6.8997	6.52568	7.38474	6.88311	4.1566	5.8909	5.79832	6.27552	5.88887	5.90544
5.35862	5.41327	5.35862	5.35862	5.31285	5.35862	5.35862	4.96301	5.92637	6.70276	5.81391	5.97205	5.81391	5.80931	5.77732	5.81203	5.81391	6.48703	5.95916	6.56646	5.95271	7.98669	6.4609	5.88921	5.87038	5.55834	5.94332
10.1898	9.69897	9.42323	10.1958	10.188	9.73957	9.60917	9.20135	9.75309	9.66271	9.93419	9.83402	10.459	9.87527	10.0476	10.2115	9.98831	10.3533	10.3496	10.464	10.0085	10.0439	9.97422	9.92798	9.68474	9.53265	9.6453
10.5692	10.9182	10.6721	11.0935	10.4656	10.4161	10.3298	9.89107	10.2391	9.85286	10.1708	10.2885	10.4809	10.1243	10.2582	10.4811	10.3374	10.6478	10.638	9.51641	10.8091	10.4749	10.5615	10.4963	10.3542	9.92024	10.1911
11.3346	9.56434	10.2017	12.1132	8.82232	9.37836	10.1361	7.31804	7.83616	9.6626	8.17199	8.29131	8.75469	8.17199	8.85451	8.41631	7.89506	11.4662	11.3249	12.1962	12.0808	12.0232	12.2494	11.9755	7.17834	7.51533	7.83173
8.60808	8.60808	8.66283	9.38683	8.35329	8.6254	8.09542	10.0311	10.6145	10.048	9.76702	10.4603	11.014	10.2613	10.502	10.6626	11.0304	12.1835	11.0395	11.7325	12.005	10.9172	11.7395	10.7461	10.2114	10.31	9.56368
12.6205	12.218	12.3262	12.309	11.3101	12.2266	12.1098	12.574	12.1304	12.4647	12.2566	12.5925	12.7632	12.4252	11.6612	12.0217	12.1557	12.8029	12.9417	11.5189	12.7495	12.4654	12.8334	12.7785	12.5852	12.3456	12.4658
10.4324	9.98933	10.0219	10.0315	8.75444	9.31353	9.2356	10.7973	10.5941	8.72667	10.8183	10.4697	11.222	10.8054	9.73478	10.3089	10.5626	12.0424	11.2387	10.7454	11.2276	10.7374	11.0372	10.8349	11.0489	10.6207	10.8943
11.0652	11.3004	11.8353	11.2351	11.8082	12.002	12.1894	12.6014	12.4851	12.7435	12.2798	13.0531	12.2087	12.0464	12.3232	11.998	11.68	11.5739	11.6811	11.4216	11.6444	12.2059	11.9024	12.1889	11.819	11.9353	11.8396
4.19412	2.61551	2.61551	2.61551	2.66424	2.54654	2.61551	2.13402	2.05861	2.18372	2.3022	2.05861	2.05861	2.32511	2.20557	2.33552	2.40548	2.58323	2.5503	2.27419	2.36581	2.32549	2.36581	2.38204	2.37028	2.5503	2.5503
7.05544	6.61539	6.00364	7.01829	6.53993	6.20944	6.49805	7.32785	8.21293	6.28484	8.87149	7.3155	8.95483	8.14856	7.15522	8.4985	9.0237	8.85476	8.48396	8.11679	7.61741	6.6612	7.77345	7.3739	8.20764	8.24731	8.05801
9.40167	9.05229	9.01077	9.55821	10.5952	10.1876	10.0807	8.2789	8.07443	9.38263	8.23824	8.40469	9.227	8.48235	9.16363	8.83528	9.09561	8.71603	8.44585	8.34183	8.50253	8.84578	8.9632	8.89383	8.80206	8.75788	9.00797
6.38902	6.74999	6.10046	7.40587	4.06953	5.27136	4.77696	3.0147	3.0147	3.0147	2.96201	3.00851	3.0147	2.96201	3.0147	3.0147	2.96201	5.01839	2.95441	4.07366	4.6859	3.05043	2.81369	4.30466	3.70368	3.47406	1.93435
9.52377	10.6474	10.259	9.6523	9.39704	9.53882	9.45352	4.65907	4.85244	5.28922	4.99545	6.55351	6.31531	4.77437	5.3455	4.70945	4.65907	7.98497	5.85927	7.31701	6.84763	6.1916	5.08546	6.80896	8.08204	5.2962	6.2306
10.1873	10.7885	9.50462	10.1981	11.7253	10.923	10.5856	11.8818	11.6691	12.0742	12.5911	10.5872	9.11656	12.0703	11.7499	11.7494	11.9632	11.0012	11.2597	9.95467	11.1031	11.8652	11.3536	11.3661	11.6416	11.6189	11.8845
8.4194	8.33603	8.63078	8.52736	7.53255	8.05092	7.78282	10.5024	10.4443	9.40332	10.4515	10.5053	11.308	10.5719	10.1144	10.646	10.543	10.7905	11.0302	11.3808	10.219	10.5618	10.235	9.4818	10.0523	10.3211	10.1375
5.9299	5.88763	4.67315	5.56241	6.5478	6.06141	5.88763	8.10394	7.74769	8.128	8.08451	7.33957	7.5219	7.97611	8.86966	7.64581	7.9226	6.53193	6.92062	7.1327	6.59841	6.43043	7.79713	7.04848	7.2524	7.74475	7.87741
2.05099	2.16781	2.16781	2.16781	2.16781	2.16781	2.16781	4.22277	4.4512	2.7854	3.90753	2.76184	2.38975	2.79394	2.42301	3.2529	3.1378	2.75859	2.77295	3.51904	3.59149	3.19435	3.3198	3.19029	3.59149	3.1648	3.59149
9.4502	9.86979	9.59834	9.99739	9.12593	9.28116	9.60353	9.46509	9.77616	9.21225	9.96996	9.94049	10.1941	9.80142	9.50152	9.66793	9.75664	10.6223	10.5611	10.4335	10.5619	9.97578	10.2474	10.4989	9.7164	10.2564	9.12414
3.73347	3.73347	4.64664	4.02048	3.45011	2.95592	4.01993	6.30893	6.57596	3.73274	6.84747	6.06633	6.48548	6.79256	6.24693	7.03626	6.79396	7.87215	6.6406	7.32321	7.53957	6.11081	7.53957	6.21031	6.11081	6.11081	6.15775
8.55029	8.55458	7.78806	7.59154	10.1785	9.32179	9.26686	10.9716	10.7894	9.96331	10.1185	9.17315	6.39932	9.8091	10.5386	9.97083	9.79804	7.97926	8.22981	8.3088	7.97177	8.36641	8.91002	8.82233	9.65141	9.11126	9.29843
7.0873	7.06452	7.0311	7.02337	5.93956	6.1284	6.61346	6.85811	6.86468	6.3281	7.51551	6.61697	4.46514	6.65815	5.47607	6.50501	6.58561	6.73021	7.3662	6.60158	7.11818	5.34416	6.40151	6.69846	5.8649	6.78332	6.64343
6.32038	6.51299	6.77921	4.5429	6.22331	6.32068	6.32038	9.79356	9.82798	9.8047	9.5355	9.82595	7.98377	9.80119	10.3635	8.87458	8.9239	8.55563	8.44925	8.68944	6.63009	8.26014	8.41794	8.87301	9.35776	9.06022	9.39443
10.934	10.8533	10.5232	10.2777	11.7972	11.4274	11.8725	10.4446	10.5911	10.5659	10.7732	10.8841	10.9939	10.9136	10.4124	10.6385	10.6196	10.1609	9.96856	9.42737	9.33749	9.95697	10.1074	10.1444	10.9637	11.2796	10.8599
12.5094	12.4809	12.0272	12.4106	12.1291	12.0399	11.9575	10.6099	10.0761	10.7541	11.1668	11.1225	11.5349	10.5235	10.6645	10.1797	10.9481	10.8054	10.4176	10.6045	10.4712	9.87887	10.2629	10.4054	10.5662	10.5169	10.5805
6.63249	7.29293	7.29293	7.44854	8.05796	7.20723	7.4408	8.32641	8.51236	7.92823	8.36013	8.99931	8.62049	8.42951	8.54476	7.68499	7.50533	8.32773	7.22795	8.52297	8.25553	8.93101	7.08163	8.35704	8.83664	8.44106	8.04211
6.81919	6.91329	5.48006	6.51165	7.93615	7.37725	7.35102	8.5956	8.54073	8.6371	8.90881	8.70022	8.88145	8.54238	7.98147	9.19324	9.32016	7.88036	7.71895	8.09932	8.47671	8.60175	7.72164	8.19131	8.23273	8.24817	8.59487
7.73324	7.8286	7.32266	7.17446	9.28218	8.82152	8.57482	9.5296	9.74941	9.9599	10.0329	9.40561	9.0365	9.11607	9.66782	9.40361	8.86815	7.66593	8.89991	8.00004	8.00432	10.4154	9.56274	9.86145	9.74679	9.84657	10.0047
13.3387	13.3714	13.7474	13.3531	13.3186	13.3984	13.561	13.3842	13.3032	13.1153	12.897	13.6076	13.0737	12.7919	12.8469	12.4641	12.3944	13.2184	13.2107	12.7697	13.3053	13.5399	13.0836	13.2511	13.0851	13.0128	13.0498
5.69218	6.166	5.55589	6.1976	6.58888	6.1976	6.44117	7.65576	7.30618	8.24727	7.16486	8.42282	7.4544	7.23202	7.49083	7.36658	7.25856	6.68935	6.15588	6.32801	6.87519	6.71488	7.02746	7.36587	7.12414	7.00506	6.86759
9.14796	8.13982	7.01045	8.01939	10.5072	9.57935	8.7862	9.71378	10.5852	10.8031	10.9022	9.53193	10.314	9.97096	11.4489	11.3504	10.7481	10.1561	11.0211	9.9384	10.0816	11.1548	11.0409	11.0363	10.301	10.1789	9.76262
9.62466	9.55826	8.48466	9.28431	9.25408	9.28431	8.89538	10.1015	10.4809	9.05166	10.6826	9.82461	11.2069	10.2357	9.97303	10.4826	10.8181	10.6277	10.412	10.9407	10.5846	10.225	10.5092	9.79693	10.3237	10.4749	10.3744
9.17981	9.05576	8.81934	8.77654	8.25991	8.81934	8.42944	8.52901	9.08802	9.4405	9.4098	9.01849	9.73437	9.18485	9.09557	9.61569	9.52548	9.51471	9.27997	9.33515	9.15795	9.11889	9.27375	8.57445	9.20551	9.27065	9.08665
6.10136	7.22663	6.16615	6.16615	6.2946	5.36416	6.16615	8.93628	8.59472	8.12448	8.43252	8.78524	7.61129	8.3333	8.10406	8.19742	8.73322	8.34011	8.13857	8.19149	8.5434	9.05348	7.56623	7.86119	8.02916	8.93217	9.07558
7.32585	6.37402	7.70166	7.03552	7.20753	7.35085	7.53792	8.03923	8.16036	8.10596	8.90684	8.57663	8.11553	8.04601	8.7774	8.46458	9.01668	8.58137	8.51855	8.97734	8.33235	8.51389	8.82601	8.65619	8.16343	8.61312	8.20241
12.4323	12.4323	12.4343	12.626	12.4323	12.4026	12.3691	11.6095	11.8515	11.9645	12.0465	11.4787	11.355	12.0282	11.7913	12.1788	11.9791	12.0418	11.8832	11.6571	11.9632	11.2731	11.7607	11.6745	11.894	11.9107	11.8291
10.0077	10.3768	9.5424	9.64951	9.16331	9.67951	8.49305	8.579	9.96614	7.68939	10.1652	7.72221	9.34382	9.90134	8.9669	10.1514	10.4961	8.5497	8.8156	9.23117	9.36554	7.08072	8.85583	8.57244	10.2294	10.5976	9.74237
11.9622	11.768	11.5753	11.5484	11.2744	11.6438	11.7824	11.3737	11.5211	10.6804	11.814	11.4419	12.0062	11.551	11.4679	11.6279	11.7208	11.3416	11.1009	10.9819	10.8739	10.591	10.7707	10.8673	11.6035	11.6679	11.5116
7.14869	7.60265	7.60265	7.46348	7.89344	8.1408	7.88265	10.6691	10.5083	10.6803	10.1001	10.1299	7.099	10.3119	9.66541	10.1001	9.95281	9.97193	9.64785	9.22013	9.98108	10.8592	10.5936	10.3112	9.7774	10.1596	9.98213
9.69635	9.88659	9.52217	9.59255	11.1057	10.6041	10.7767	11.2701	11.3928	11.1026	11.6209	11.5289	11.5457	11.6968	11.3584	11.426	11.3664	10.7018	10.7226	10.5722	10.5596	11.5533	11.1761	11.4289	11.4702	11.3517	11.5761
7.71584	8.25496	8.25496	7.92357	8.97767	8.25496	9.03862	10.083	10.0329	9.23588	9.74156	10.1672	8.62552	9.65835	8.76637	9.72207	9.35725	10.041	9.87214	9.42361	9.60392	10.1788	9.6178	9.46687	9.56505	9.47446	9.72477
10.0164	9.94638	8.9764	10.0698	8.86974	9.3102	9.10747	9.4771	10.179	9.83409	10.3095	8.89629	7.97566	10.122	10.0079	10.4883	10.557	10.4373	9.72602	9.90053	10.1558	9.43922	8.9412	9.73853	9.69826	9.84232	9.57088
7.52736	6.76934	6.49295	6.76934	6.86402	6.45559	6.47194	3.93961	4.47414	4.16572	5.05219	4.16572	4.27328	3.98293	4.48912	4.6459	5.2043	4.47149	4.50088	4.98022	3.71334	2.93788	4.49474	3.21972	5.40822	4.97043	5.20909
11.0572	10.8487	10.4799	10.6166	10.3876	10.6166	10.2666	9.8031	10.0572	10.5064	10.2329	9.92978	10.4312	9.80911	10.7904	10.3613	10.9597	10.1238	10.1779	10.8963	9.59024	8.87411	9.48688	9.5997	10.7392	9.94631	10.2816
10.4681	10.71	10.5017	10.5684	8.88412	9.92897	9.46817	10.1457	10.2409	10.0834	10.0328	10.359	10.6444	10.4571	10.0429	10.1814	10.1596	10.6725	10.3785	11.0486	10.8116	10.168	10.3993	10.4244	10.5875	10.4919	10.5474
9.3881	9.09025	9.53904	9.12287	7.56048	8.20841	8.22035	10.4773	9.86578	10.7137	9.32445	10.5746	10.8597	10.3782	10.9283	9.83076	10.1467	10.3786	9.57234	10.357	10.2134	9.40795	9.6787	9.59715	9.8695	10.1049	10.0959
9.27109	9.27109	9.69112	9.69393	8.68253	9.14054	9.27109	8.07169	8.03862	8.18157	8.63434	9.026	9.22511	8.68355	8.63029	8.12949	8.36939	9.35732	8.52982	9.08915	9.7193	8.62	8.49941	8.50579	8.65888	7.94892	8.24576
7.97997	7.51398	8.0277	7.81488	7.77365	7.75534	8.12836	9.08983	9.43066	5.87043	9.36965	7.83147	8.5848	8.85959	7.64871	9.25907	9.16731	9.01434	8.54758	8.26347	9.20808	9.05123	8.52919	9.02416	9.42465	8.77512	9.4981
10.8763	10.5661	10.6782	10.5711	9.80008	10.2788	10.3129	10.9742	10.9645	10.4522	10.9628	11.0861	11.3516	10.8643	10.7396	11.1532	10.8604	11.1913	10.8891	10.6977	10.9368	10.5898	10.8604	10.637	11.0636	11.14	11.0242
5.82014	5.57418	5.72772	5.37272	5.35412	5.95997	5.57418	8.85335	9.17206	6.32498	9.16504	8.52562	9.59955	8.62751	7.77132	9.49945	8.99925	8.89057	8.54774	8.25074	8.05149	7.64456	8.41662	8.34061	9.55565	9.09763	9.18891
10.3601	10.4596	10.0015	10.2307	9.98468	10.1214	9.70451	8.44808	9.04182	7.44164	8.95866	7.8039	9.33233	8.73596	8.9332	8.82304	9.02928	8.95306	8.91521	8.23675	8.52621	7.52125	7.99005	8.22279	8.62542	9.41421	8.92836
11.2071	11.3526	11.0401	11.283	10.6613	10.6937	10.5898	11.4981	11.8811	11.1347	11.8359	11.2916	12.3159	11.4541	11.4651	11.702	11.7046	11.4968	11.4826	11.1974	11.1487	10.3371	10.6844	10.3016	10.6275	11.4145	10.7769
5.50248	6.32838	5.84852	5.50248	5.26977	5.50248	5.09161	3.82082	3.82082	4.0363	3.6413	3.82082	4.35681	3.7763	3.06659	3.6413	3.82082	6.75113	5.31555	2.99213	5.47126	6.43747	5.27276	5.81983	3.75517	2.94806	3.90654
6.80381	6.80381	6.72881	6.32621	7.21285	6.80381	7.21588	9.50798	9.48825	9.06688	9.07334	8.80753	6.21896	9.26756	9.47871	8.91453	9.06559	7.48412	8.26928	7.45008	7.28694	8.8438	8.34444	8.21463	8.76353	8.86322	8.88053
11.9892	11.502	11.3891	11.5866	11.3933	11.429	11.3675	11.3148	11.2613	10.5464	11.346	11.0283	11.7067	11.5654	11.6579	11.3998	11.6218	11.3593	11.2191	10.9734	10.9414	10.5952	10.6838	10.9729	11.5512	11.7137	11.5437
9.12004	7.81687	8.63719	8.07239	7.0138	7.43052	7.05259	8.41499	8.61158	4.79662	9.04993	7.38349	9.26931	8.50281	7.88463	8.57161	8.90937	8.40123	6.8411	9.08589	8.06608	6.35159	6.27613	7.91153	8.25255	8.18053	8.07891
9.37067	9.60451	9.33848	9.4753	10.2587	10.0727	9.99999	9.68636	9.72226	9.8885	10.1017	10.2411	10.1841	9.71507	9.80712	9.37528	9.64563	10.1495	10.2908	9.33536	10.1004	10.2547	10.0488	10.2249	10.0176	10.1545	10.3916
7.51815	7.29828	7.44868	8.08402	8.99302	8.6121	8.5958	9.67428	10.4468	10.0183	9.74777	9.17001	7.63475	9.72504	9.03241	9.65211	10.2558	8.26284	7.74132	7.36676	8.56736	9.58958	9.05079	9.26613	9.25594	9.41966	9.55294
7.64097	7.66378	7.49197	7.46424	8.72539	8.01294	8.25454	8.72493	8.69538	8.57725	8.23253	8.44421	8.40733	8.51842	9.4106	8.28674	8.18203	7.0155	8.02094	7.69918	7.61262	8.27186	8.02094	8.10279	8.45449	7.99443	9.04073
10.6894	10.7561	10.799	10.7276	10.3239	10.5549	10.1972	10.5203	10.5668	11.2435	10.5952	11.0904	11.2082	10.598	11.027	10.7855	10.9629	10.9196	11.1611	10.59	10.5398	10.8195	10.4974	10.733	10.4068	10.8826	10.7645
9.69898	9.72871	9.68683	9.77336	8.95033	9.64476	9.52289	8.97875	9.08535	8.75291	8.99721	9.14188	9.3086	8.84497	9.03654	8.95229	8.94362	9.0516	8.9326	8.80117	8.97372	8.75508	8.62826	8.93687	8.63761	8.18471	8.47107
5.67353	5.62855	5.70806	5.62855	5.63915	5.16876	5.62855	7.89671	7.99274	4.55483	8.11134	7.26716	7.33879	7.65917	7.58817	7.85831	7.88355	7.63732	7.66699	8.16245	8.31773	6.28231	7.61085	7.79667	7.47338	7.43373	6.91946
9.77662	9.33181	9.33422	9.36924	10.1693	9.76257	10.0717	8.85813	9.09974	10.1618	9.50299	9.84699	9.62269	9.44761	10.1929	8.99054	9.84084	9.18536	9.0719	9.13642	9.38641	9.57364	9.22558	9.3541	9.58835	9.34983	9.35219
8.68651	7.89447	8.37667	9.67088	7.26543	7.76707	8.76625	9.91488	9.72483	8.72587	8.60452	10.3003	6.68646	8.50214	7.97128	8.77774	8.27268	9.08586	8.40214	9.92971	9.86217	9.90913	9.76861	9.41991	6.45701	6.68664	6.48614
10.3044	10.4005	11.6607	10.5706	8.91162	10.1953	10.1856	10.735	10.295	10.5882	9.8532	11.0078	10.4405	10.3403	10.5459	9.72242	10.4038	11.0377	10.3058	10.2489	10.6685	9.7336	10.2222	10.515	9.56577	10.117	9.87477
8.32679	8.93045	10.6336	10.2561	7.31816	8.78788	8.92901	9.72306	9.12323	6.68183	8.31718	9.87426	9.18966	8.78348	8.9566	7.89499	8.99598	9.44478	8.75256	9.54652	9.23157	8.52211	8.84016	8.9303	7.60347	8.36201	8.15555
2.05099	2.05099	2.73909	2.18743	2.44623	2.19179	2.05099	6.41473	5.90743	6.93732	5.57067	5.94538	6.44622	5.68968	5.89371	5.90743	6.13766	6.31635	6.25175	6.31635	5.55405	6.27338	5.45265	6.1861	5.17247	6.38757	6.32328
8.43333	7.26229	7.54091	7.49833	7.47182	7.49833	7.48117	7.16555	7.76495	7.02716	7.75841	7.50905	8.31985	7.59794	7.83956	7.28407	7.26408	8.32525	7.89108	7.8005	6.36781	6.75296	7.40868	7.13576	6.24976	7.12427	6.24976
8.21266	7.5564	6.61302	6.37131	8.76284	8.85954	8.81915	5.1593	6.64626	5.38817	5.73946	5.38817	8.87561	5.59191	5.55782	5.38817	5.38817	5.84137	6.16348	5.36852	5.13388	6.20769	6.89363	6.6145	5.92407	6.06988	6.26749
9.27376	9.40899	8.81122	9.22769	10.4032	9.47025	9.40139	10.1869	10.324	10.1368	10.6622	10.175	10.2333	10.6747	10.3938	10.3356	10.3279	9.12013	9.75901	9.01916	9.49806	9.86538	9.58132	10.0051	10.0811	10.1201	10.4002
9.77387	10.2991	9.89482	10.1575	10.398	9.79738	9.71688	8.93784	9.18621	9.24232	9.45303	9.36559	7.59809	8.82799	9.24232	9.00969	8.81272	8.67266	9.01139	9.12653	9.08592	8.89867	8.67266	8.67266	8.94534	9.11647	9.33987
8.97243	9.17253	8.61349	9.20084	9.81346	9.17253	9.33397	8.97715	9.09579	9.67606	9.94192	9.69171	9.97416	9.54287	9.81333	9.48861	9.65392	9.20657	9.38132	9.90107	9.47691	9.01868	9.7794	9.54117	9.44797	9.29388	9.24272
11.8436	12.2682	12.2583	12.0051	12.4678	12.436	12.2925	12.4083	12.338	12.3967	12.7495	12.2059	12.3538	12.338	12.0084	12.1689	12.3986	12.4387	12.3584	11.6516	12.5352	12.3584	12.3584	12.4243	12.1668	12.3584	12.3589
8.91722	8.81122	8.62411	8.9444	10.1271	9.61876	9.70773	8.30955	8.38709	9.14333	8.86141	8.62408	8.72298	8.82831	8.7495	8.61207	8.67908	7.29783	7.77865	7.98169	7.926	8.66726	8.3509	8.45293	8.92052	8.13668	8.59864
7.76638	7.30899	7.14562	7.3365	7.1718	7.30899	6.47497	6.05232	7.55949	5.92666	7.24267	6.77136	7.99518	7.43372	8.78451	8.5752	8.6704	7.2087	8.52999	9.00998	8.03	6.96177	8.05681	7.41197	7.72338	7.45274	5.33479
12.3331	11.9279	11.6446	12.4144	11.6681	12.1064	11.2641	10.5711	10.9688	11.2475	11.1847	10.8645	11.3083	10.9665	11.6438	11.8339	11.6822	11.9427	11.8462	12.7451	11.7499	10.6577	11.7581	11.6816	11.8052	11.9781	10.8007
10.1351	9.84127	9.69049	9.9819	8.63981	9.34511	8.34841	8.75367	9.36343	9.275	8.90809	8.93686	9.73613	8.36825	9.41776	9.84468	9.81108	9.08551	9.4854	10.3672	9.00035	8.86947	8.49926	8.71461	9.18554	9.44007	7.02427
5.39258	5.84493	6.23204	5.62029	6.73342	6.44178	6.95515	7.82185	7.70367	9.19655	7.86397	8.07864	7.07694	7.58092	7.84868	7.17915	7.32911	7.19258	6.8096	7.19258	7.28424	8.02608	7.58829	7.86172	7.35266	6.73995	7.60246
11.764	11.5917	11.6647	11.3954	10.9447	11.2098	10.9139	10.2794	10.5898	10.6808	11.1875	10.6384	11.0358	11.0538	10.9579	11.1657	11.1997	11.0833	10.6736	11.297	10.8879	10.3707	10.6756	10.5136	11.0866	11.0223	10.47
4.35937	4.05137	3.42678	4.35937	4.85407	4.72064	4.35937	3.40358	4.08518	5.03005	4.31143	3.40358	2.46527	3.40358	3.50393	5.43719	5.80303	2.93489	4.13106	4.60612	3.07303	5.33794	3.50366	4.13714	3.32345	3.50783	2.88317
8.4068	8.19172	7.99984	8.53786	8.63527	8.2743	8.52023	8.27926	8.88859	6.28564	9.13228	8.01365	9.25367	8.81146	8.25423	9.08371	8.89275	9.04456	8.42189	9.69812	8.58546	8.67081	8.84573	8.68538	8.76993	8.7418	8.42938
10.6594	10.5299	10.2738	10.321	9.71399	9.83795	9.79833	9.88187	10.2601	9.62021	9.88185	10.1884	10.5643	9.8904	9.45848	10.226	9.92713	9.96966	9.67261	10.1367	9.59419	9.39884	9.47634	9.4538	9.76719	9.91299	9.54785
9.7997	9.72102	9.27418	9.50844	9.15928	8.65075	8.6506	9.69841	10.3578	7.49803	10.1255	9.62599	11.1192	10.2915	9.79914	10.589	10.3134	10.3164	10.0243	10.2989	10.1342	9.26166	9.68758	9.89288	10.1644	10.0866	9.97536
10.584	11.0808	10.965	10.584	9.71071	10.482	10.2291	8.97555	9.48813	9.35112	10.0623	9.39945	10.0762	9.25964	8.82193	9.65906	9.46828	9.85452	9.77095	9.63229	9.22305	9.00027	9.42802	9.09603	9.46748	9.17022	9.26913
5.02613	3.76034	7.94872	6.42208	2.67339	4.97584	4.66647	7.24314	8.10519	5.06428	7.97777	6.92079	8.36712	7.86583	7.03257	8.16188	8.5154	9.36707	8.47981	9.63283	8.70449	6.35522	7.72693	8.08177	5.91514	6.63564	7.3658
9.41042	9.29656	8.66312	9.15865	10.2275	9.76608	9.87285	9.65464	9.62976	9.53379	9.39198	9.8619	8.92815	9.95909	10.6091	9.51975	9.73043	8.91734	8.95932	8.65082	8.83874	9.50552	9.30379	9.61618	9.69882	9.81499	9.95997
10.2574	10.2007	10.2928	9.91738	10.445	10.3139	10.3344	10.1479	10.4263	10.1579	10.5468	10.4637	10.9527	10.5741	10.2763	10.49	10.2531	10.9163	10.8032	10.4025	10.295	10.328	10.6302	10.6519	11.0393	10.6435	10.7935
10.9163	11.0556	11.0781	10.7545	10.1675	10.5198	10.4348	10.3009	10.2952	9.04534	10.2011	10.6259	10.7757	10.2435	10.1868	10.2798	10.3131	11.0192	10.6	10.5835	10.583	10.3356	9.81622	10.0625	10.1015	10.0206	10.3091
7.97167	7.63587	7.36709	7.10271	6.9949	7.0678	7.32068	6.91014	7.75524	4.9203	7.44459	7.04954	8.07394	6.9638	6.94297	7.3788	6.98099	8.47322	7.84081	8.02944	7.23273	7.49962	6.69261	6.45972	6.56832	6.05641	6.84829
11.4974	11.4232	10.9211	11.2711	10.4124	10.912	10.8766	9.51601	10.1037	9.08196	10.4444	9.51293	10.37	9.9612	10.2506	10.5771	10.5942	10.5244	9.72314	10.5982	10.3876	9.2495	9.78062	9.65703	10.101	10.1903	9.75323
9.8332	9.75388	9.10414	9.45145	9.43545	9.59656	9.62565	9.11826	9.44861	9.37869	9.38922	9.04081	9.5025	9.42107	10.1136	9.54398	9.71855	8.7799	8.99057	9.01797	8.95911	9.17157	8.64732	9.2602	9.35592	9.30209	9.62429
8.69011	8.3794	7.39884	7.50908	7.50908	7.14789	6.1333	8.23912	8.77046	8.62692	8.83346	8.08463	8.67177	9.06616	9.6326	9.16307	9.44373	8.87123	9.27977	8.86593	8.95752	7.70328	8.71862	8.72499	8.52231	8.23915	9.06656
11.2031	11.3295	11.2858	11.4265	11.0961	11.3397	11.4453	11.0658	10.9835	10.2056	10.9288	11.0673	11.3635	11.3424	11.4597	11.3245	11.072	11.146	11.3907	11.392	11.1302	10.7536	11.2458	11.3911	11.341	11.3134	11.411
2.88634	2.88634	2.88634	2.88634	2.88634	2.88634	2.88634	3.62362	3.48837	4.1797	3.09845	3.09705	2.82535	2.82535	2.82535	3.65688	2.97421	2.56122	3.24279	2.56451	3.36883	3.32094	2.52149	2.71185	2.68921	2.52149	3.21914
8.93729	9.06982	8.56961	9.05232	9.72646	9.27134	9.56131	8.62226	8.32497	7.98247	8.33216	8.78116	8.9802	8.89771	8.446	8.55764	8.32497	7.16057	7.84558	7.54529	7.62587	8.21903	8.01566	8.19679	8.68739	8.08127	8.61577
6.94226	7.10626	6.66024	6.71299	7.5685	6.94226	6.94226	9.39428	9.63413	9.29001	9.8305	8.54062	7.98128	9.42572	10.012	9.85029	10.0533	8.03689	8.39619	8.36562	8.42357	8.75323	8.42357	8.43636	8.86148	8.71076	9.0113
5.60346	6.06049	6.29586	6.15551	7.32692	6.29586	6.89114	6.83025	6.60056	8.28963	6.8709	7.49257	7.7823	7.97769	8.13608	6.82969	7.40031	5.33952	6.49529	5.56737	5.72815	7.01128	6.7977	6.93134	6.92244	7.22321	7.71044
12.206	12.3718	9.95888	10.9182	11.4129	11.4758	11.6287	11.6637	10.9238	10.9078	11.2561	11.0131	12.0665	10.7115	8.38703	10.3023	10.9936	11.387	12.282	9.314	10.758	11.1915	10.748	11.5399	11.7743	11.0489	11.888
4.14441	4.14441	3.36362	4.20378	4.29798	4.14441	4.14441	7.9156	8.52578	9.73564	9.14394	7.94663	3.97297	8.6535	9.23621	9.04599	8.90095	8.12086	8.38569	8.979	8.54753	9.65763	9.26715	8.434	8.13568	8.15625	7.674
12.0406	11.8065	11.2166	12.018	11.2895	11.1838	11.4633	10.7888	10.756	9.73996	11.6154	11.0773	10.9892	11.0626	11.1187	10.9547	10.964	11.4976	10.9583	11.5123	11.3433	10.5871	11.0863	10.5467	10.8281	10.7331	10.7304
4.67455	4.54606	4.54606	4.36464	4.98633	4.4927	5.01375	8.60572	7.76801	7.80108	6.6111	7.40912	6.27656	8.46141	9.49197	6.88254	6.83897	6.12358	6.6625	6.3308	6.1203	7.38227	6.14753	6.90377	7.81531	7.32621	7.97298
5.81242	6.21168	4.96665	5.31505	6.70484	5.83233	6.83091	7.20156	6.93082	7.05612	6.73891	6.93534	5.73203	7.3408	8.15683	7.35761	6.75528	5.99226	6.19407	6.32139	5.36286	7.77374	6.61622	6.43158	7.4676	6.79252	7.32386
10.4521	10.4659	10.41	10.41	10.41	10.304	10.5174	9.99147	9.63036	10.4252	10.1454	9.94516	10.7074	10.2492	10.3533	10.1949	10.3304	9.79303	10.1314	9.78281	9.92907	10.0527	9.58172	9.98378	10.2364	10.2694	10.4386
3.16779	2.77758	2.77983	2.76857	4.27149	4.0423	3.38852	7.22103	7.44172	8.18829	7.63955	6.925	7.29534	7.27316	8.90635	7.93952	8.54111	6.74522	7.11153	7.36615	7.27808	7.89066	8.05059	8.01286	7.92953	7.62299	7.04345
10.5315	10.6252	9.7506	10.2957	11.0709	10.7736	10.6848	10.009	10.1818	10.6151	10.2104	10.3779	10.1319	10.057	10.0188	10.1717	9.99807	9.56947	10.2598	9.29248	9.76848	10.3573	10.0614	10.4056	10.4588	10.2421	10.2587
9.06979	9.51752	8.94087	9.11053	9.73375	9.19326	8.54243	7.6069	8.26147	7.98525	8.46882	8.5766	8.18735	8.4511	8.60178	8.22811	8.63594	8.72212	8.73668	8.66799	8.54174	8.45756	8.28458	8.2947	8.7148	8.2561	8.07591
11.6412	12.039	11.6781	11.775	11.7599	11.646	11.4805	11.3681	11.9702	12.3493	12.3738	11.6595	11.8497	11.901	12.049	11.7762	11.7881	11.8924	12.2152	12.2424	12.3997	12.5395	11.8773	11.9962	12.2529	12.0349	11.9759
6.38764	6.98984	6.67585	7.4193	7.58759	6.93422	6.93422	5.61769	5.83363	5.8139	6.34248	5.78261	6.2449	5.87874	5.85163	6.09116	5.90821	5.98921	5.85549	6.21356	6.10667	6.12856	6.41746	6.357	6.32127	6.12874	6.5244
10.3595	10.4779	9.56598	9.98744	10.6995	10.4628	9.50652	9.40653	9.49079	10.0162	8.67913	8.8955	8.64032	9.47297	9.58842	10.062	10.0598	8.85764	9.10475	8.16477	8.89404	9.60663	8.21724	9.27039	9.60395	9.90763	10.605
11.3129	11.1945	10.3744	10.9812	11.6598	11.4902	11.1945	10.4861	10.4846	11.3649	10.6519	11.1889	11.6117	10.2874	10.4945	10.8618	10.9572	9.37018	9.67605	9.10203	9.21629	10.182	8.84727	10.204	10.7112	10.4046	10.5644
9.4359	9.56781	9.56698	9.29806	10.2199	9.63065	10.1749	10.9253	10.7209	11.3722	11.1676	10.866	10.7992	11.0309	10.7968	10.584	10.6438	9.79656	9.87838	8.98108	10.2769	11.2497	10.4329	10.6599	10.7644	10.254	11.0274
9.52322	9.66153	11.0074	10.1257	8.80105	9.68009	10.0721	10.1674	10.1383	9.72568	8.80926	11.2122	10.4086	9.86112	9.46845	9.32716	9.14988	10.3245	10.4131	11.0308	10.8286	10.6211	10.4801	10.4574	9.38037	9.64073	9.6561
6.72128	6.41548	8.193	6.47788	7.09816	7.31101	8.47439	7.46758	7.74405	6.19035	6.11406	8.1659	7.28384	7.03634	5.49338	6.66164	6.56164	7.32583	7.13795	6.98637	7.20857	7.8319	7.32583	7.32583	7.32583	7.15046	6.7307
9.79863	9.74547	9.27675	9.89445	9.68041	9.88023	9.91153	8.98803	9.10689	8.33871	9.71911	9.02856	9.54288	9.07053	9.96522	8.83565	8.8332	9.17522	9.38967	8.36151	9.16589	8.31998	9.13943	8.92245	9.11681	8.78474	8.21171
9.43266	9.68257	9.07443	9.59886	9.32824	9.16668	9.49977	9.30197	9.21567	8.97841	9.37914	9.44975	9.74182	9.13785	9.55642	9.13377	9.24403	9.21044	9.1041	9.11549	9.05106	8.71538	8.86354	9.11346	9.73792	9.29364	9.36005
3.47501	3.47501	2.97016	3.47501	3.40328	3.87656	3.56977	3.01495	2.95811	2.18617	2.69542	2.75944	2.92154	2.69542	2.51346	2.74277	2.74232	3.63426	4.43799	2.62985	3.12589	5.89536	4.38232	3.47297	3.71334	2.70342	3.26401
4.90811	5.09076	4.94429	4.90811	4.60396	4.55505	4.90811	6.41191	6.36377	6.41191	5.61565	6.06088	6.41191	6.41191	5.49691	6.20136	6.41191	7.5433	7.23368	7.19801	7.55297	8.86854	7.20061	7.08484	6.26875	6.26518	6.79635
12.1928	12.2686	11.9186	11.8164	10.7396	11.2808	11.279	10.3436	9.91639	10.3111	9.90239	10.674	10.8784	10.3294	9.36811	9.95133	10.4126	11.5283	10.8189	10.1359	10.8752	9.78475	10.2686	10.5283	10.4503	10.3647	10.627
8.28284	8.69904	8.70579	8.8004	9.79815	9.64529	10.0596	10.2336	9.88346	10.632	9.63984	10.7984	9.5211	9.52361	9.68712	9.53674	9.81641	8.37636	8.13448	8.50694	8.74236	9.5572	8.71927	9.11645	9.35974	9.14273	9.22907
10.2619	9.48358	9.73481	10.0999	10.4797	10.6467	9.80931	10.3263	10.5547	11.3485	10.8195	10.5385	11.6051	11.0141	11.4305	11.5188	11.6131	10.7792	11.5617	10.3075	10.5637	10.41	10.5073	10.2169	10.1806	10.9199	9.91192
2.06012	2.06012	2.10161	2.06012	2.06012	2.06058	2.05099	1.54425	2.05617	1.6237	1.6237	1.6237	5.7422	5.51554	1.64872	6.9146	7.44428	4.12376	3.90956	3.90956	3.90956	3.90956	3.90956	3.90956	3.90956	3.90956	4.1907
4.07196	4.07196	4.01448	4.10587	4.38836	4.01448	4.07196	4.39098	5.06105	5.16391	5.52674	4.52263	4.39098	4.78855	4.47495	5.78333	5.53889	4.45733	4.85152	3.74385	4.66693	5.05868	4.37819	5.1757	5.09793	4.273	4.273
2.19564	2.19564	2.19564	2.19564	2.85478	2.19564	2.17146	7.08903	7.48219	6.16815	7.5196	3.40893	3.07392	6.77216	7.29644	7.56709	7.29367	6.62605	6.55704	7.70164	7.02972	7.70164	6.75007	6.11909	6.07823	5.68092	5.58157
8.64057	7.90551	8.93402	9.44375	7.4252	8.02408	7.33055	7.03971	8.18266	3.43167	9.13082	6.38246	6.61918	8.05652	6.69059	7.49252	7.24137	8.44185	7.95161	8.37522	8.33951	6.29604	7.63419	7.16545	6.39554	5.83736	6.39531
11.9888	11.5889	12.5067	12.5682	11.0362	11.695	11.5763	10.1302	10.3922	10.1698	11.3742	10.5485	9.46066	11.0791	10.4907	10.4809	10.7288	11.2928	11.0936	11.4846	10.945	10.5958	11.0545	10.7383	9.70009	9.65105	9.75356
6.58344	6.66689	7.45419	7.23404	7.22218	6.85735	7.23468	8.48619	8.61082	8.52436	9.5504	7.97541	7.53974	8.15949	8.44503	8.20722	8.06659	8.39395	8.53621	8.85055	8.65148	8.96085	9.04494	9.07443	6.66852	7.24171	7.72846
11.0667	11.0953	11.23	11.1965	11.5084	11.3795	11.3814	11.1125	11.2123	11.5253	11.1781	11.394	11.7934	11.2452	10.8808	11.1682	11.1719	11.0065	11.0258	10.8811	11.1833	11.1758	10.9422	11.2518	11.3026	11.2646	11.4848
2.65744	3.00153	2.40663	2.43816	2.64974	2.43816	2.4902	2.80111	2.32537	2.32537	2.33637	2.284	2.32982	2.3402	2.3072	2.3654	2.32537	2.56137	2.56137	2.55053	2.66937	2.75511	2.8153	2.59446	2.54715	2.63576	2.62468
10.2449	9.91463	9.44776	9.55318	9.29583	9.57961	9.37118	10.5542	10.4043	10.2736	10.7322	10.6418	11.3695	10.6243	10.993	10.7968	11.0722	10.8498	10.3119	11.2067	10.1218	9.92235	10.3216	10.1304	10.9945	11.2941	10.6122
7.01817	7.18305	7.18305	6.80498	7.96133	7.15116	7.7776	7.64546	7.81587	8.32311	8.18198	6.82801	5.87721	7.85247	7.27847	7.45485	7.62795	7.0992	6.80468	7.13123	7.6122	7.7078	7.34878	7.56869	7.22251	7.34935	7.618
7.0215	7.10504	7.10398	7.06735	6.61624	6.92274	6.65634	7.92928	8.27335	6.54774	8.1424	7.24114	7.98349	8.19815	7.86609	8.45721	8.53555	8.29095	8.2786	8.41611	8.10899	7.28993	7.91167	7.77837	8.37251	8.03389	7.07356
11.7246	11.6405	11.8942	11.9169	10.9171	11.3799	11.2266	9.52394	9.48192	8.6966	9.71713	9.72892	10.255	10.2727	10.117	10.2232	10.4481	10.1092	9.88344	10.6064	10.196	9.2944	9.90675	9.75064	9.72029	10.1614	9.99418
13.0686	13.1725	13.066	13.127	12.7047	12.797	12.8119	11.0794	11.1711	11.2306	11.2867	11.1352	11.5531	11.1411	11.0187	11.1353	11.1907	10.6237	10.649	11.0289	11.0026	10.5166	10.5848	10.5546	10.8787	10.9345	10.5556
7.51226	7.99188	7.31673	6.99609	8.34709	7.59132	7.85861	7.67986	8.16354	5.20779	8.24271	7.84454	6.10271	8.15556	7.63173	7.9334	8.07351	7.59762	6.50338	7.34784	7.19406	7.17841	7.22427	7.30306	8.33343	7.73539	7.99533
11.4978	11.5633	12.382	11.7581	12.1081	11.9893	12.4292	12.0642	11.7473	11.8637	10.938	12.3567	10.6338	11.7474	11.6275	11.1034	11.2195	10.8107	11.1812	11.2279	10.9812	11.4759	11.0143	11.5559	11.2094	11.2862	11.2775
3.21808	3.27547	11.5462	7.9591	8.64994	9.40322	11.6735	8.52986	8.22146	6.99948	4.62045	9.11747	2.5195	7.51241	1.84641	4.88301	1.84641	2.473	2.47306	2.47306	2.473	7.91526	2.47306	2.47306	2.473	4.98783	2.473
7.35814	7.38845	6.28123	6.36352	8.7094	7.966	7.35814	9.73078	10.2338	10.1616	10.6671	9.63848	8.38815	8.83217	10.8165	8.47571	7.88775	6.8033	8.33584	6.13442	5.70086	7.62779	6.14624	8.96639	9.34913	8.62093	9.34913
12.0737	11.9767	12.4052	12.1391	11.0774	11.5926	11.5664	10.9779	10.5534	10.8473	10.1116	10.9684	11.2865	10.9753	11.4067	10.4076	10.5836	10.8704	10.6049	10.862	10.7122	10.3847	10.5425	10.4362	10.3328	10.4008	10.5101
11.3828	11.3754	11.2018	11.0932	10.7207	10.9367	10.9418	11.0811	10.9944	10.8987	11.1414	11.2598	11.4308	10.473	10.8695	11.0737	10.8504	10.7007	10.0455	11.2669	10.2198	9.46442	10.1635	9.81057	10.5408	10.3493	10.3
3.5835	4.65569	5.67437	4.89152	5.36922	5.30784	4.76614	9.57108	8.84364	7.7283	10.7395	7.59294	4.16441	7.63631	9.32321	4.32014	7.31918	4.75574	9.67874	5.10437	6.08893	4.78255	5.17763	8.47754	8.18562	9.88019	5.4082
8.20026	8.00783	8.20026	7.70388	8.44296	8.20026	8.94713	8.57769	9.0755	4.49849	8.46201	8.50104	7.31862	7.63201	8.29166	8.3816	8.04364	8.61476	7.60025	8.36592	7.69119	7.96794	7.88694	8.52746	8.1528	8.83062	8.30346
11.1864	11.1594	10.8581	11.1027	11.2342	11.4287	11.1674	9.95495	10.2859	10.6259	10.6296	9.86935	9.22443	10.411	10.3358	10.3707	10.4034	10.3424	10.2841	10.0314	10.4477	9.48711	10.1048	10.2908	10.3862	10.7622	10.7685
11.0852	11.4077	10.0233	10.8764	10.7056	10.2429	10.5811	10.2028	10.4487	9.02636	11.1303	10.5541	11.2066	10.3064	9.87709	10.8019	10.3371	10.9421	10.8732	10.0427	10.8002	10.1011	9.99478	10.4999	10.5677	10.4382	10.2685
10.2005	10.1042	10.1022	10.2735	9.86713	10.1042	9.91191	8.60359	8.97955	6.07192	9.59221	7.1784	5.71538	8.97937	8.33568	9.22138	9.21131	9.46939	8.82312	8.88416	9.43312	6.45377	8.85959	8.98956	9.32686	9.45843	9.41088
10.0838	9.89415	9.85951	10.0838	10.0838	10.0841	10.4188	10.4936	10.2305	10.4542	9.98386	10.6642	10.5258	10.0646	11.0168	9.86463	9.84778	9.5063	9.58774	9.45344	9.58769	9.99997	9.53288	9.90569	10.2475	9.6222	10.4637
12.2542	12.0861	12.4083	12.1632	11.4436	11.8938	11.6366	12.5475	12.5884	11.8022	12.48	12.5298	12.8273	12.5474	12.5464	12.4579	12.6377	12.5281	11.9431	12.2603	12.4813	11.9514	12.0729	11.9818	12.3381	12.2955	12.1066
12.7283	12.9324	12.831	12.9111	12.4241	12.4754	12.2721	11.2334	11.2536	10.7951	11.2668	11.1414	11.1831	11.1102	11.3486	11.1068	11.2625	11.3007	11.2031	11.5468	11.1615	10.8102	10.9749	10.6985	11.0903	11.1235	11.0709
12.9135	13.0305	12.777	12.6028	12.7337	12.6062	12.656	12.5139	12.5915	11.5592	12.7195	12.4954	12.5945	12.4889	12.1905	12.5139	12.4439	12.6503	12.4274	12.2079	12.3787	12.2989	12.1637	12.2263	12.5785	12.5298	12.5428
12.6778	12.5783	12.9865	12.4781	13.7121	13.459	13.5197	13.0769	13.142	12.8415	12.8685	13.4971	12.7743	12.9162	13.0634	12.5972	12.4217	12.648	12.5396	12.3489	12.5657	13.382	13.0582	13.2858	13.1058	13.1409	13.1719
8.99728	8.85956	8.09396	8.33328	6.69504	7.71061	6.69504	5.06329	3.72144	6.33242	5.06644	5.46479	6.57523	4.39101	4.9508	4.48263	5.07053	7.21155	7.00819	6.5673	7.31319	6.73598	6.61049	6.34785	3.01097	5.18175	5.31182
7.17118	7.38772	6.00209	6.42638	6.44561	7.17298	6.12901	3.72748	3.1899	3.7116	3.26303	3.7116	3.80389	3.7116	2.54965	3.35005	3.13241	4.76815	4.57621	3.57871	4.71557	4.62018	4.5275	4.49984	2.15511	3.42671	3.71867
9.42971	8.49598	8.24849	8.83641	5.94528	7.6857	7.12737	8.07435	7.84403	3.9108	8.38211	7.76524	8.73091	7.65837	7.45258	8.02083	8.27199	10.9873	10.0129	9.27998	10.4192	8.70523	9.55286	8.84188	7.49195	7.69096	7.52973
10.978	10.3591	9.63952	10.4768	11.4165	10.4768	9.79266	9.32465	10.3208	10.9151	10.4465	10.1621	11.8817	10.2261	10.7824	10.8869	11.5258	11.4884	10.4467	10.8732	10.4829	11.1113	10.8152	11.2524	10.1792	11.4641	10.0043
9.76064	9.45579	8.34716	9.27392	10.2603	9.21822	8.58997	7.64266	9.55211	9.09202	9.55602	8.74994	10.4644	8.98574	9.35327	9.97963	10.7491	11.0374	9.47527	10.2325	9.68864	9.68351	10.0281	10.5068	9.31996	11.0872	9.11086
10.1204	9.97824	10.0232	10.2631	9.15352	10.0908	9.80457	8.44437	8.91057	8.41541	8.8607	9.47641	9.00697	8.85252	9.24376	9.31186	8.81768	9.05353	9.24303	9.3872	8.98543	8.93546	9.09973	8.70185	8.50065	8.1964	8.56014
2.26326	2.26326	2.26326	2.2905	2.26326	2.26326	2.28021	2.17809	2.20934	2.17809	2.17809	2.17809	2.17809	2.19635	2.1655	2.1655	2.17809	3.29548	2.06191	2.46966	2.39506	3.04985	2.06191	2.29069	2.44307	2.06191	2.06579
9.95645	10.7199	10.5057	10.62	10.5057	10.5057	10.336	9.4774	9.36872	9.96814	10.1299	9.45907	10.2544	10.0543	9.51663	10.1737	10.1737	10.598	10.4943	11.4789	10.4989	10.2432	10.5046	9.96466	9.96174	9.97989	10.1189
8.3461	7.44038	7.96112	8.24157	7.97495	8.11571	7.81553	9.46908	10.2751	9.84368	10.688	9.91794	10.3921	9.71016	10.7335	10.6751	9.91806	8.90851	10.7407	9.36251	8.16223	8.68618	9.13687	8.07315	9.20231	9.20205	9.4817
13.7472	13.9003	13.7014	13.7176	13.8935	13.7984	13.9636	12.5112	12.5927	11.3884	12.8457	12.6516	12.8843	12.4139	12.0586	12.5179	12.2898	12.7049	12.6468	12.6276	12.839	12.3198	12.6746	12.9014	12.7867	12.7484	12.8665
13.4178	13.4417	13.4178	13.3801	13.2998	13.4364	13.5311	12.6157	12.6238	12.7867	12.8837	13.0482	12.9669	12.638	12.7387	12.547	12.4591	12.5634	12.6017	12.7654	12.731	12.361	12.6679	12.8386	12.7041	12.6565	12.8637
11.0669	11.1127	10.5293	10.535	11.0992	10.4831	10.5337	10.0468	10.0664	10.6846	10.7944	10.9952	10.7842	11.0252	11.2511	10.903	10.9031	9.91704	9.40269	9.56608	9.7993	10.3042	9.86381	9.71205	10.5677	10.6021	10.7563
9.4285	9.48815	9.35045	9.5985	10.5035	10.1745	10.1116	9.35658	9.72814	9.20711	10.3557	9.74692	9.72456	10.1585	10.1899	10.0768	10.3787	9.49973	9.36303	9.28517	9.39002	9.61942	9.71737	9.97471	9.90937	9.92989	10.0202
2.322	2.35182	2.48331	2.26167	2.60558	2.322	2.322	4.30206	3.38144	3.24213	3.24213	3.24213	3.24213	3.24213	3.74153	3.24213	3.31387	3.36532	3.36532	3.40511	3.36532	3.56495	3.36532	3.36532	3.4723	3.36532	3.36532
6.37767	7.16297	6.14701	6.5743	6.6336	6.116	6.30522	3.30404	3.30404	3.30404	3.30404	3.30404	3.30404	3.30404	3.30404	3.30404	3.30404	3.50742	3.80984	4.24414	4.27969	5.08572	3.38032	3.91236	1.93534	2.72538	3.89979
8.838	9.03427	9.27195	8.90449	7.60449	8.42585	8.39012	8.03722	7.79157	7.94622	7.41869	7.98972	7.82992	7.12523	7.11663	7.34557	7.38044	7.54063	7.40389	7.56222	7.26875	7.31291	7.31978	7.43171	7.34464	7.37058	7.27964
11.5077	11.5218	11.2429	11.2476	10.9541	11.0591	11.2392	9.82602	10.1991	10.563	10.3928	10.5259	9.72651	10.0738	10.4017	9.80246	9.73935	8.67534	9.04512	8.51198	8.56568	9.22371	8.71877	8.62427	10.1773	9.12956	9.02766
10.212	10.058	9.8826	10.2674	10.3575	10.594	10.8974	9.9229	9.45744	9.75966	9.47165	10.3205	10.4523	10.0291	10.4083	9.16942	9.53263	9.05151	9.74898	9.1616	9.39118	9.24087	9.88598	9.87428	9.83651	9.67381	10.2293
11.3675	11.4032	11.2483	11.5086	12.207	12.3226	12.2388	11.7229	11.9823	12.5231	11.6524	12.19	12.2681	12.2992	12.5808	12.2189	12.3015	11.9897	11.8532	11.8833	12.0582	11.9145	12.3969	12.2799	12.373	12.5131	12.493
3.84669	4.13327	3.477	3.84669	4.01999	3.79653	4.19221	8.20107	8.40313	8.54273	8.04769	6.17493	3.44156	7.74234	7.83687	7.71654	7.37256	6.94653	6.81243	6.86036	6.90578	8.02287	6.32871	7.24585	8.01646	7.57051	8.00007
7.8113	7.95927	8.09702	7.39221	6.3749	6.57812	6.93052	7.52527	7.19607	7.04453	7.50513	7.92641	8.29576	7.44442	7.616	6.98566	7.43087	6.7305	5.88112	7.01393	6.86647	5.11993	5.09189	6.1606	7.76888	7.35235	5.85878
8.3252	8.5014	7.82799	7.30275	9.14462	8.02909	8.47827	8.05695	7.89724	7.72263	7.21403	7.9784	7.21265	7.63685	7.55916	7.88783	7.82046	8.04752	7.92836	7.53274	7.83576	8.87865	8.32659	8.15044	7.96547	7.92653	8.4777
6.44397	6.34563	5.69622	7.04662	8.0044	7.94231	7.99006	8.40179	7.75819	9.26907	7.97599	8.7319	7.60226	8.43179	9.33615	7.62195	8.37791	7.38421	7.79979	7.29101	8.08415	8.26407	8.20793	8.66642	8.38928	8.12785	8.65576
8.02123	9.03901	8.21458	8.98816	9.59252	9.13447	9.67175	7.88454	8.08099	8.34913	8.63383	7.88454	7.26223	7.72041	7.88454	7.9324	8.1368	7.95546	7.71974	8.17919	8.58852	8.45321	8.71195	8.25626	8.64568	8.06683	8.34366
13.2401	13.0512	12.9698	13.0272	12.7592	12.7988	13.0272	12.3703	12.0803	12.4498	12.044	12.3792	12.722	12.5119	12.8034	12.2048	12.3345	11.9774	12.1185	12.5279	12.0062	12.0803	12.336	12.2998	12.3836	12.1434	12.4138
6.79612	7.00933	7.52907	6.93521	6.6952	6.56863	6.6952	9.1713	9.10259	8.67411	8.55641	9.86891	10.3628	9.83288	9.81066	9.42518	9.54779	7.34767	7.47428	9.25329	6.69797	7.68904	8.10353	6.76914	9.76515	8.1689	9.0142
6.44861	5.893	5.59929	6.49394	6.79761	6.75983	6.44861	7.66939	7.63574	8.19243	8.08915	8.17321	8.85491	8.31335	8.6196	8.37966	8.79498	6.76914	6.44244	6.1084	7.16447	7.19702	7.41126	7.40798	7.36606	7.66473	7.51755
8.48536	8.88673	7.88767	8.71558	8.40761	8.05735	8.46926	7.65696	8.26504	7.8494	8.98713	7.96713	6.92641	8.56033	8.88721	8.87873	8.87737	8.35664	8.5578	8.60714	8.30852	8.17849	8.11526	8.40243	8.53685	8.27694	8.40337
8.19398	8.2224	7.82423	8.1068	8.8033	8.2224	8.32499	8.65599	9.43051	9.34326	9.72679	8.30172	9.27186	9.44757	9.43108	9.59975	10.2495	8.08699	6.78708	8.14554	8.2847	8.62826	8.02621	8.46646	8.99065	9.08523	8.71319
10.1262	9.96702	9.53066	9.46182	10.991	10.6756	10.9264	10.3097	11.507	12.0293	11.1237	10.5344	11.2636	11.848	11.2858	11.5334	11.9488	10.7633	11.029	10.0342	10.5806	11.1825	11.2703	11.4256	11.5831	11.6678	11.9181
7.13382	7.21172	7.30486	6.93712	7.61873	7.31005	8.59107	8.49991	8.63995	7.53746	8.11824	8.19845	6.49978	8.14199	8.17981	7.69899	7.46121	7.87758	8.10795	7.45221	7.8942	8.90262	7.64402	8.34529	8.18898	7.57157	8.56955
11.6002	11.6727	11.8521	11.7708	10.9602	11.2712	11.2278	11.1793	11.2445	10.6408	11.0642	10.9225	11.2631	11.1846	11.5223	11.2142	11.4435	11.2006	11.3434	11.8121	10.8127	11.3367	10.823	11.3685	11.0518	11.2651	10.578
10.0817	10.1036	10.6947	10.3311	9.79307	10.2422	10.3951	10.513	10.6943	10.0117	10.3628	10.8751	10.9268	10.4141	10.3455	10.4349	10.1625	10.9347	11.1318	10.4777	11.3941	11.1176	10.958	10.932	10.3596	10.332	10.2168
8.46851	8.35655	8.48584	8.80627	8.23389	8.13386	8.01825	7.90268	6.79137	7.87472	8.31421	8.0594	8.55594	8.25141	8.37067	8.99939	8.0957	8.48529	8.22354	7.61788	9.0641	8.57047	8.63305	7.99359	7.0289	6.99778	7.46475
10.0862	10.0654	10.1173	10.1281	10.1272	10.1281	10.4386	10.2344	10.4098	10.7028	10.4343	10.7203	11.1847	10.7279	10.227	10.3079	10.0839	10.1909	10.2503	9.61264	10.1599	10.244	10.123	10.3098	10.562	10.279	10.3794
8.75114	7.52161	7.50959	10.2095	8.0396	7.87091	7.30452	7.12154	7.35919	6.83093	8.51886	7.12097	8.53322	7.77648	7.48239	8.34203	7.3506	11.7153	10.1597	11.4445	11.2191	9.89132	11.3126	9.75142	7.39473	7.50292	8.33915
9.11458	8.17882	9.43225	10.1484	6.88047	7.81507	7.08045	7.9042	8.74808	8.22702	9.10214	8.96314	9.31248	9.01704	9.01926	9.14952	8.82953	12.2147	11.1575	12.0542	11.6628	11.4167	12.199	10.7919	7.30832	8.20745	8.29415
11.232	11.1853	10.6321	10.9923	10.3261	10.6058	10.5316	10.3507	10.5282	10.7052	10.6406	10.5775	11.1175	10.5134	10.0994	10.7136	10.6311	10.7766	10.3303	9.6655	10.3879	9.52104	10.0037	10.4249	11.0158	10.6199	10.7352
9.21792	9.67905	9.43013	9.54448	8.16599	8.40455	8.78762	8.36747	8.05879	7.28828	9.1124	7.94414	8.80403	8.60393	6.602	8.44449	8.60273	9.38477	9.01929	9.08537	9.51534	7.81257	8.46721	8.91897	8.22709	8.45578	8.51591
10.8844	10.5514	9.86626	10.6353	10.3713	10.6622	9.99887	9.82742	10.5085	10.6978	10.5676	9.05498	8.15161	10.1424	10.5398	10.9484	11.2471	10.1977	10.9919	9.96343	9.75119	8.89392	9.63338	10.1536	10.8372	10.6338	10.183
9.13225	8.81273	10.13	8.78959	9.62184	10.3409	9.78085	12.0787	11.4929	11.5492	13.4351	12.2089	11.9668	11.1097	12.7635	8.55797	10.9756	9.39501	5.54556	7.96713	9.43893	8.84087	9.40964	12.1449	11.3211	12.4667	10.1573
2.7117	4.02444	6.74793	4.96671	4.82634	4.64532	6.54278	9.12801	8.33138	10.0223	7.06695	9.33621	6.47613	6.96312	5.07866	5.81387	5.81387	6.87272	6.49942	5.64579	5.37426	9.12345	6.78324	6.09996	5.81498	6.187	5.62496
11.5182	11.6848	11.577	11.4386	11.7688	11.6654	11.577	11.554	11.4583	11.2247	11.4276	11.8267	11.8792	11.4986	11.3012	11.4104	11.2265	11.3468	11.5463	11.1131	11.5455	11.5379	11.6243	11.5238	11.6367	11.483	11.7804
11.9102	11.8473	12.3868	11.7797	10.5858	11.4102	11.0603	11.335	11.6041	10.9502	11.4315	11.7367	12.0362	11.8982	11.3102	12.0879	11.943	12.2927	11.8088	11.8318	11.859	11.3814	11.5312	11.0212	11.6567	12.1817	11.6483
10.7492	10.7338	10.6676	10.4046	11.071	10.9564	10.8652	8.81495	9.20107	6.52117	9.3193	8.67922	9.41196	9.05357	8.46578	9.01295	9.42553	8.70713	8.46401	8.53324	9.07652	8.41528	9.49975	9.06869	9.31969	9.67116	10.3797
10.1504	10.5294	10.722	10.3554	11.1193	11.1198	11.437	10.3746	10.4681	10.9922	9.78701	11.3444	10.3201	9.79759	9.75756	9.32798	9.54223	9.28554	9.53726	9.49737	9.38077	10.1351	9.86165	10.0826	9.49518	10.0818	10.1914
7.18459	7.57428	7.18459	7.18459	7.18459	7.18459	7.20352	9.13182	9.23002	9.80005	9.52071	9.9181	9.13182	9.70043	10.0353	9.25009	9.13182	8.33006	9.44833	9.19948	9.33432	9.44692	9.44692	9.44692	9.34398	9.44692	9.44696
10.041	10.4805	9.7674	9.94541	11.1754	11.0593	11.0509	10.9101	10.7378	10.8111	10.8184	11.4462	10.2308	10.8338	10.1067	10.3309	10.3627	10.6348	10.713	9.96465	10.4976	11.2723	11.0463	11.3594	11.0345	11.0144	11.2555
11.0594	10.1441	10.8171	11.2093	12.1832	12.2235	11.4657	11.7463	12.3122	12.3521	11.9137	11.7829	11.9597	12.3279	11.9389	13.0258	12.9233	11.257	11.3661	11.6739	10.9976	11.771	11.7084	12.4826	12.1267	12.5295	12.0001
10.9297	11.0034	12.2893	12.0957	11.7931	12.1057	12.5035	11.1689	10.8378	11.1615	10.5723	11.6719	9.94565	10.8091	9.48944	10.314	9.88623	10.8561	10.6442	10.1104	11.1909	10.9593	11.4253	11.0802	10.0132	10.0219	10.2309
13.7756	13.7522	13.738	13.5759	13.6899	13.6264	13.7872	13.8165	13.7293	13.6124	13.7523	13.9629	14.0919	14.0994	12.6794	13.8153	13.9144	13.3333	13.2599	12.0968	13.3761	13.6958	13.494	13.4663	13.8606	13.6649	14.0293
12.2581	12.0327	12.0327	12.0327	12.0717	11.9898	11.7584	11.8345	11.8382	11.6986	11.8769	11.9279	12.5124	11.9849	11.9356	12.4935	12.3886	10.7783	11.2587	9.51524	11.04	10.9279	10.7794	11.2049	12.1099	11.8474	12.3159
7.48594	7.74181	6.89708	7.10448	8.28201	7.99808	7.3914	9.15504	9.23287	5.81152	9.0139	4.77666	2.98335	9.03867	8.68324	8.77937	8.87652	9.2112	8.51064	8.22717	7.73467	9.56019	8.82801	8.66636	8.89362	9.28153	8.99431
12.6289	12.2055	12.395	12.3001	13.1758	13.2598	12.8306	11.6547	12.8273	12.4358	12.6197	11.8303	13.1344	12.1542	12.8771	13.0899	12.7419	11.6276	11.0935	10.703	10.2634	12.0957	11.616	12.7861	12.352	13.0723	12.2338
7.22657	7.52128	7.25873	7.72566	7.33331	7.15623	7.18423	9.17985	8.86932	8.9709	8.9502	8.86932	7.94907	8.89237	8.86932	8.88824	8.85391	9.15521	8.22062	9.21723	8.95716	9.115	9.20057	9.19348	8.8388	8.8492	9.19348
9.19007	9.60627	8.74797	9.05633	8.93847	8.93847	8.77141	8.51196	8.91608	8.19234	9.02423	8.74223	9.57469	9.17281	8.74223	8.9835	9.13455	8.80788	8.70175	8.83024	8.86779	8.5065	8.01914	8.38452	9.54215	9.29311	9.12135
9.52673	9.56074	9.03917	9.34424	9.85658	9.60884	9.35702	9.15997	9.5826	9.43322	9.69751	9.45194	10.489	10.1145	10.1067	9.97432	10.1603	9.20478	9.38759	9.4166	9.19641	9.09509	9.28284	9.4912	10.3841	10.1818	9.98915
9.73904	9.28648	9.2077	9.53911	10.7039	10.0606	10.9681	10.3904	10.9567	11.6049	11.4954	10.8673	10.8451	10.9183	10.7929	11.7391	11.3377	10.6277	10.544	10.5895	10.2742	11.6483	11.2665	11.1921	11.0645	10.7276	11.0067
9.59725	10.434	10.6228	10.2887	10.8652	10.434	10.6988	10.549	10.6677	9.77035	10.5787	10.6667	9.82346	10.4121	9.89509	10.3688	10.3118	10.2522	10.2772	10.2563	10.6198	11.3148	11.0094	11.3146	10.684	10.4145	11.0975
11.1843	11.2547	11.4546	11.1843	11.1974	11.1155	11.1155	10.5803	10.3858	10.4874	10.189	10.8401	10.4483	10.6653	10.3793	10.3718	10.8571	11.2285	11.0903	10.7634	11.0862	11.1219	11.0906	11.0616	10.4868	10.6451	10.8022
11.4019	11.6176	11.7733	11.4637	12.1603	12.0612	12.2003	12.4688	12.7133	12.6902	12.4157	12.834	12.4116	12.0889	12.5453	12.0218	11.9499	11.595	11.8883	11.5968	11.8676	12.2894	12.0473	12.385	12.2794	12.2326	12.3254
10.0198	10.2166	10.2166	10.0384	10.4738	10.6325	10.4065	11.1051	11.1822	11.5965	11.1007	11.4649	11.5875	10.9382	11.181	10.9357	10.7665	10.8531	10.5853	10.7143	10.6876	11	11.0966	11.0129	11.367	11.3121	11.204
9.68227	10.0436	9.74902	9.68505	10.5579	10.3111	10.4911	10.5888	10.4808	10.3869	10.4904	10.7414	10.8906	10.5464	10.6365	10.321	10.2471	10.4254	10.2477	10.1556	10.1162	10.3835	10.635	10.6216	10.8298	10.7647	10.637
9.98813	9.55278	9.46884	9.60753	9.21529	9.17914	9.55278	8.8372	8.9822	7.05621	8.31382	7.95151	9.35928	9.11976	9.2302	8.62907	8.96797	8.70227	9.22703	9.31733	9.16427	8.07185	8.88061	8.88561	9.74346	9.2175	9.75812
9.87416	9.8083	9.62843	9.64331	8.96172	9.44262	9.49247	11.2567	11.0759	11.09	10.4954	11.2481	11.7955	11.5143	11.7698	11.0333	11.1902	11.5887	10.7994	11.5461	11.0887	10.8278	10.9828	10.9871	11.7372	11.2945	11.398
8.55305	8.04138	8.41354	8.75437	7.41394	7.79996	7.62252	8.53468	8.34617	6.90175	7.84334	8.28521	9.06375	8.44844	8.31991	8.28521	8.67129	9.03396	8.8962	9.17439	9.43998	9.64097	9.26504	9.03198	7.41453	7.58732	8.42454
8.71424	8.33069	8.86521	8.73632	7.03872	7.92698	8.12043	9.88798	9.86559	9.04715	9.51831	10.1979	10.2357	9.93545	10.247	10.06	9.97803	10.1012	9.6364	10.5727	9.88846	9.2888	9.83729	8.87429	9.0628	9.43922	8.95313
8.07023	8.38559	7.94608	8.12804	8.49874	8.17595	7.39157	7.49385	7.78166	6.77824	8.16416	6.87101	7.92141	7.758	7.8615	8.02826	8.51083	7.91926	9.02305	8.55668	8.7487	7.42649	8.61843	8.29675	8.04699	7.25666	7.78401
11.3379	11.3427	11.2612	11.2051	11.5724	11.5299	11.5543	11.3343	11.2905	11.6493	11.517	11.6006	11.5984	11.1268	11.3037	11.2874	11.1207	11.0052	11.1523	11.2208	11.1393	11.2887	11.3265	11.2641	11.2615	11.0919	11.2794
9.6618	9.73343	8.28307	10.4646	9.93012	9.51464	9.62582	10.5319	10.1578	10.4823	10.5	10.1177	9.51433	10.3193	9.83258	10.5726	10.1551	11.3447	11.2317	11.5689	11.7299	11.67	11.7993	11.3751	10.2754	9.79409	10.1751
4.90285	5.91105	6.03149	5.95255	6.27541	5.9208	5.87568	9.27602	9.31307	8.22005	9.12792	8.81202	6.52194	8.96705	8.16019	7.82155	7.39695	7.18422	6.95552	7.17924	6.95408	8.3696	7.45783	7.68276	8.38315	7.19804	7.66082
8.79503	9.29688	8.58689	9.09078	9.33963	9.41565	8.80267	9.40799	9.87989	10.2642	9.40643	10.1307	10.0563	10.079	10.1554	9.82578	9.85607	9.94256	9.87374	10.0857	10.18	10.5659	10.122	10.5678	10.0107	9.97252	9.64242
12.4499	13.1075	12.7234	14.2251	14.4628	14.8597	13.9237	13.7445	13.5973	14.3579	14.1578	13.7633	14.2828	14.0309	12.8898	14.5616	14.5164	13.2377	14.1944	13.697	12.7159	13.4772	13.7804	13.3378	13.3893	14.2925	14.1366
9.74471	9.35204	10.5207	11.3091	10.0009	11.5718	9.81123	12.0995	11.8049	12.0897	12.3542	11.6714	11.8862	11.9132	11.0577	12.8078	12.8112	11.7087	11.8521	11.8387	10.5579	10.6358	11.0127	10.8513	10.4527	12.9213	12.3179
10.1963	10.2983	10.2842	10.4398	9.7289	9.97938	10.2022	10.0824	9.88376	9.7146	9.79783	10.1853	10.6636	9.94472	9.25483	10.0083	9.77683	10.7473	10.2712	10.5251	10.9655	10.4564	10.5783	10.4788	10.2439	10.1187	10.157
11.906	12.035	12.6278	11.7452	10.7969	11.4139	11.5602	11.8021	11.8772	11.8622	11.0481	12.1564	11.406	11.6477	10.1854	11.2297	11.0835	11.9088	11.0584	11.692	11.3667	10.9093	11.3908	11.2088	11.4317	11.9666	10.9875
5.53444	4.61967	6.44294	6.43726	6.82721	6.23541	7.70473	8.33901	8.86077	9.1385	8.39929	8.81722	7.21257	8.57911	7.98521	8.30645	7.4416	7.66916	7.72983	6.643	7.5555	9.80494	8.555	8.88872	8.31404	7.9051	8.43571
9.00794	9.00794	8.7222	9.02118	9.19462	8.58146	9.21421	7.67776	8.41491	2.83805	8.06862	6.99462	6.73676	8.05836	5.49763	7.69649	7.96413	7.71376	7.72694	6.4067	7.85267	4.35621	6.69496	7.52063	7.63271	7.88256	7.92181
12.6994	12.9264	12.7564	12.6688	12.4505	12.4138	12.6371	10.7138	10.5471	10.8476	10.701	10.9575	11.596	10.8279	10.287	10.7745	10.8011	10.4911	10.5697	10.2931	10.5004	9.93803	10.3144	10.4888	10.8482	10.8778	10.797
10.8506	10.9891	10.8979	10.8581	10.1619	10.244	10.5518	10.4094	10.1299	9.60801	9.82286	10.5619	10.9597	10.5314	10.9296	9.90669	10.2199	10.684	10.5089	10.3662	10.2846	10.0787	9.68559	9.82072	10.2864	10.3822	10.0777
4.3525	3.17135	5.02289	3.63398	2.56319	2.66114	2.66114	6.31726	6.00142	4.78021	5.37151	6.80376	7.79012	6.39864	6.66344	5.41741	7.09083	5.56264	5.13235	6.36995	5.16506	4.12431	5.25578	4.75427	4.07413	5.13235	5.13235
7.06044	6.52475	6.17063	6.6321	7.09429	6.55037	6.71367	7.85002	8.03612	7.19192	8.48275	7.86141	6.05645	8.28947	7.96659	8.28524	8.08838	6.9187	7.36135	6.51955	6.80737	7.64405	6.94753	7.30199	7.88548	7.19009	7.96107
7.79347	7.84659	8.88612	7.79347	7.55232	7.55232	7.80858	8.52904	7.93045	8.73408	7.55638	9.41603	8.70057	7.6375	7.98291	8.02577	8.06753	8.49964	7.58977	7.03461	7.69035	6.99139	7.20446	6.64596	5.67763	7.23347	6.84527
10.2399	10.3119	10.7642	10.3531	10.0807	10.3572	10.6787	10.2046	10.4922	9.78926	10.003	11.3898	10.3084	10.0579	9.56763	9.38395	9.76054	9.87668	9.91943	9.48647	9.94877	10.3499	10.0227	9.86498	9.8173	9.66717	10.1629
2.84179	4.22052	3.49938	2.65183	2.77046	2.84179	2.85348	7.27067	7.96159	6.25003	6.8914	6.06607	6.01992	6.86206	5.61843	6.28143	8.34256	7.08464	7.71797	7.62873	7.06246	6.99252	6.8824	7.06246	8.41636	7.06246	7.06539
11.7734	12.0047	11.9782	11.743	10.6013	11.1696	10.7604	10.8571	10.8019	11.2042	11.0145	11.0078	11.8109	11.1476	10.6231	11.3616	11.306	11.5646	11.3029	11.6928	11.6605	10.9303	11.06	10.8662	11.2531	11.112	11.0838
11.5752	11.4436	11.7947	11.4911	11.9851	11.8809	11.782	12.6958	12.7748	12.601	12.4738	13.2867	12.6452	12.6239	12.7559	12.4133	12.0502	12.2868	12.461	11.9464	12.4522	12.5254	12.3952	12.5711	12.4248	12.423	12.4471
6.25919	6.25919	5.86835	6.25919	7.28387	6.48337	6.53188	7.93187	7.96214	8.44075	7.8167	6.55202	6.51072	8.08608	8.94365	7.55279	7.95226	5.98379	6.7254	6.47168	6.18671	7.84086	6.99449	7.37663	7.13753	6.99449	7.63901
6.43466	6.39393	5.9776	6.39393	6.39393	6.36678	6.55403	9.13357	8.71868	9.76493	9.22261	8.87451	6.91083	8.89322	9.77152	8.87943	8.69226	6.53752	7.42808	7.02384	7.14229	7.1796	6.37076	7.89661	8.73491	8.53699	8.85685
12.081	12.5684	12.6145	12.539	12.0538	12.0245	12.1329	9.29348	9.68199	10.8196	10.0781	9.87304	9.39157	9.78953	9.33207	9.2665	9.65453	9.89583	10.1757	10.7536	10.344	10.5327	10.2018	10.0024	9.52286	9.48889	9.80522
10.5115	10.4513	10.682	10.4156	10.2517	10.1107	10.5128	11.3272	11.0883	10.5948	10.8479	11.2508	11.0078	10.916	10.4537	10.4798	10.7996	10.6195	10.3738	9.98921	10.4461	10.7324	9.97631	10.3254	10.7455	10.9417	10.7435
4.50956	5.16489	5.02749	4.70135	5.86983	4.70135	5.46513	8.15785	8.7641	10.1448	8.01092	8.52137	6.11878	8.39454	8.32528	7.83034	7.52018	6.02383	6.5355	5.67882	6.31185	8.20362	7.11377	7.69095	7.89236	7.17048	7.72314
5.4491	5.4491	5.10323	5.4491	5.4491	5.5003	5.4491	8.215	8.0852	9.30106	9.20328	8.58782	7.72438	8.76861	9.72149	8.65874	8.49484	7.35203	7.36206	7.01219	8.18551	7.91929	8.61431	7.93213	8.61184	8.30448	8.67481
12.4342	12.4108	12.3462	12.3938	11.226	11.5418	11.6755	11.2791	11.4719	10.1125	11.2989	10.8095	11.5955	11.1933	10.6579	11.5455	11.2485	12.0338	11.46	11.7171	11.5172	10.7804	10.995	11.0658	11.0882	10.8882	11.1754
9.99484	10.2212	10.2649	10.03	8.35644	9.326	9.34385	9.58849	10.0739	9.78304	9.78462	9.55392	10.4005	9.98726	10.0091	10.2411	10.4193	10.1632	9.51445	10.1778	10.0935	10.0301	9.61828	9.57001	9.8157	10.1154	10.0864
2.78304	2.54415	2.51501	2.51501	2.51501	2.51501	2.11182	2.2582	2.31512	2.55451	2.43357	2.2582	2.37176	2.52694	2.63003	2.6146	2.72736	2.55242	2.55242	2.21133	2.55242	2.55242	2.21437	2.21133	2.31348	2.55242	2.55242
11.7602	11.3114	11.1603	11.1242	10.9792	11.0655	10.6781	11.6572	12.2549	12.1267	12.0061	11.5643	12.7015	11.9941	12.1417	12.9319	12.896	12.3978	12.4179	11.697	11.6385	11.4087	11.024	11.9999	11.5139	12.3724	11.1105
8.3679	9.07576	8.46502	7.89171	9.29763	9.08103	9.40207	9.14919	9.15715	10.1281	9.70299	9.12565	8.15366	9.27141	9.78993	9.47623	8.92441	8.19711	9.13576	8.73662	7.95774	9.01414	9.08402	9.17772	9.27846	9.45088	9.22324
3.13352	4.41199	4.17105	4.34391	4.32396	3.92654	4.17105	4.16887	4.19915	4.44702	4.16887	5.0055	4.16887	4.16887	4.16887	4.16887	3.56982	4.72414	4.1669	4.69172	4.72414	7.27953	3.64022	4.72414	4.73134	4.52791	4.69172
5.05949	5.05949	5.03239	5.34502	5.05949	4.99286	5.36031	3.46379	3.66463	3.82559	3.46379	3.01467	2.12251	3.46379	3.46379	3.46379	3.03325	3.30621	3.44302	3.74151	3.4665	4.94736	3.29782	3.28415	3.28365	2.98154	3.29374
2.33064	2.3432	2.33064	2.2559	2.33064	2.39532	2.34036	4.16192	4.03035	4.48422	4.32795	3.947	3.947	4.34278	5.36457	3.92949	6.13719	4.49743	4.26363	4.71736	4.45833	4.45833	4.55722	4.38663	4.71736	4.71736	4.71736
10.5294	10.3119	11.2433	10.8639	10.5238	10.539	10.9106	9.31066	9.60378	10.4916	8.44674	9.54814	7.96656	10.0989	10.1725	9.58759	9.69573	8.34274	8.16882	7.19996	8.68356	7.39968	8.42613	9.01389	9.01236	9.07968	8.32917
9.65252	9.3564	10.5351	9.70952	8.39109	9.3564	9.60419	10.0084	10.1892	9.33674	9.63077	9.94084	9.38857	9.89031	10.1403	9.49289	9.34362	9.20544	8.14641	7.64605	8.9015	7.83727	8.42165	8.97117	8.96866	9.42053	8.00728
11.9019	12.5012	12.1947	12.0805	12.5393	12.2975	12.4493	12.7866	12.7398	12.3472	12.5584	12.9171	12.1854	12.5562	12.4925	12.3117	12.0408	11.9995	12.3982	11.8738	12.4279	12.7796	12.2142	12.489	12.483	12.4497	12.4491
3.24312	3.40148	2.99242	3.22453	3.52123	3.24312	3.24312	6.41922	7.05378	7.43041	6.65537	5.02866	4.76688	5.17702	5.58563	5.3381	5.33113	4.68032	4.76545	4.72293	4.68265	5.78841	4.77551	4.72474	4.75539	4.72293	5.37891
12.7516	12.7389	13.5492	13.5124	12.6372	12.973	12.6148	14.1222	13.5918	13.4474	13.7343	13.8645	14.2688	13.6279	12.4639	12.9756	13.3089	15.0826	14.7157	13.5417	14.9483	14.9028	14.8859	14.7127	13.1441	13.3353	13.6742
9.87621	10.0262	10.1299	9.90258	8.77401	9.36271	9.18099	9.69427	9.82046	9.53099	9.90918	9.83806	10.0456	9.40194	8.96868	9.74549	9.49309	10.4493	10.0194	10.1286	10.3135	9.4533	9.63781	9.55447	9.19868	9.48205	9.20952
11.0545	11.2898	11.0887	11.0684	11.1596	11.0684	11.0684	10.561	10.5391	10.4688	10.4003	10.7561	10.8106	10.2709	9.87564	9.98101	10.2324	10.8519	10.7116	10.4356	10.8498	10.6794	10.7592	10.7198	10.6031	10.1681	10.6109
7.58248	8.15732	7.50686	7.81538	8.11365	7.89182	7.95415	8.65366	8.62274	7.42765	8.59284	7.89849	8.15389	8.16009	7.17459	8.14169	8.56883	8.73493	8.29228	9.21148	8.62308	8.98519	8.83533	8.19607	8.24949	7.94319	8.28269
12.1604	12.2643	12.2002	12.2289	11.8202	11.8941	12.0288	7.85192	8.18166	8.56216	8.89551	8.42513	9.91028	8.65604	8.42513	9.15257	8.55665	8.9532	8.93056	9.44844	9.327	8.76417	9.20936	9.31014	8.95534	8.93607	8.94804
10.9741	10.3741	10.0533	10.0608	10.4496	10.6194	10.9149	11.1013	11.0714	10.7806	11.6269	11.2078	11.6227	11.4592	11.8206	11.362	11.3352	10.2226	9.08695	9.277	9.4025	9.53985	8.69247	9.81011	11.0825	11.0677	10.9981
10.5639	10.6655	10.8278	10.5821	9.90782	10.7324	10.2982	11.9374	12.0113	12.3843	11.5505	12.1107	12.3528	11.7408	11.7511	11.9874	11.8552	11.2883	11.385	11.0406	11.395	11.1774	11.3683	11.2719	11.8686	12.1024	11.8761
8.90297	9.34469	9.5512	9.49376	9.17532	9.28544	9.49271	9.14478	9.50958	9.09445	9.21426	9.84148	9.91943	9.26483	8.70908	9.44468	9.24882	10.8647	9.97607	9.92375	10.4236	10.3914	9.93656	9.86146	9.81283	9.16455	9.77293
9.31316	9.62531	9.13651	8.95183	8.6961	8.81906	9.18606	9.32428	9.28015	8.527	10.0197	9.9535	10.3756	9.33787	9.18513	9.609	9.42655	9.78184	8.80834	9.21212	8.92738	8.87421	8.64199	8.48238	9.32831	9.39486	9.79501
2.05099	2.05099	2.05099	2.05099	2.27827	2.07219	2.05099	5.21889	6.12033	2.89549	5.45304	3.20628	2.32093	5.57212	5.21889	5.76896	5.7889	4.91514	4.91514	4.46915	4.99713	4.91514	5.72889	4.91964	5.64359	4.95007	5.50267
6.35955	6.29101	6.0131	6.93948	7.08515	6.46063	7.23071	8.94686	8.94779	8.95297	8.82941	8.23884	7.23518	8.71525	8.9535	8.50344	9.16395	8.37044	7.76962	8.60606	8.18729	8.99966	8.10326	8.38946	8.60239	8.35667	8.43927
6.05697	6.28993	6.24641	6.09224	6.41144	5.81966	6.17991	6.86138	7.74556	6.91158	7.5705	7.24752	5.25148	6.94714	7.11516	7.54219	6.94826	7.18193	6.97923	7.37966	7.20872	7.37966	7.14491	7.37995	7.12096	6.63519	5.96218
8.07971	8.20645	7.40493	10.23	6.60443	8.67192	7.97756	5.90285	5.93211	8.05749	6.97709	5.86142	7.24014	5.53388	6.0297	7.24014	6.84373	10.059	9.33675	10.091	10.235	9.26325	10.6436	10.0758	6.57321	6.72958	6.34963
8.3853	8.30418	8.28749	8.58235	8.40397	8.3853	8.3853	8.17867	7.62894	8.22203	7.88367	7.83587	8.81316	8.78481	7.90179	7.94902	8.66159	8.28788	8.26744	8.43094	8.28503	8.27853	8.69056	8.51883	6.96324	8.05783	8.72748
10.6574	10.1154	10.2162	10.5211	9.60905	9.90572	9.83972	10.3	9.60853	9.27781	10.2633	10.2927	10.1803	10.1989	9.86268	9.94025	10.3354	10.5558	9.92321	10.734	9.92889	9.74399	9.97889	10.0321	9.52501	9.69373	9.61749
7.86256	7.98376	7.70447	7.88547	6.92969	6.88877	6.88209	7.54782	8.2087	8.57455	8.43167	8.51824	8.8882	8.27826	8.90695	8.85778	8.47037	8.66569	7.96168	8.38209	8.4807	7.62571	8.57124	7.78288	8.17771	8.0043	8.2838
8.69024	8.57471	8.57816	8.89591	9.82502	9.51652	9.52945	9.88545	9.72248	9.90572	9.8086	9.69436	8.34437	10.1415	9.90961	9.79989	9.77258	9.56745	9.88553	9.29878	9.69926	10.4283	10.3157	10.2683	9.98675	10.0885	10.4003
7.07865	6.99425	8.02961	6.99425	6.39948	6.99425	6.96914	11.9355	11.6218	11.0867	11.2128	12.1809	11.7313	11.4656	11.45	11.4106	11.143	11.0845	11.0831	11.7741	10.8995	11.2294	11.1511	10.3288	10.8183	10.9992	10.0237
9.10273	8.61063	8.56488	8.04302	6.63718	7.31647	6.76128	6.81554	6.11386	7.63739	7.03333	6.82047	7.71839	6.24716	7.25762	8.20151	8.97617	7.80487	6.81815	5.25665	7.6844	5.01024	5.97532	6.44378	6.7582	7.31212	5.74903
12.5784	12.6674	12.3518	12.2514	11.7484	11.8539	11.4435	10.2304	10.5477	10.712	10.8646	10.5938	10.9561	11.2337	10.6164	11.1951	10.8933	11.047	11.0968	10.4152	11.1468	10.3376	10.6891	10.8603	11.1692	11.0808	11.1054
9.46345	9.46973	9.25848	9.17594	9.38228	9.0188	9.21808	10.3832	10.6201	10.7517	11.1849	10.9249	11.1573	11.0148	10.8006	10.5817	10.7544	9.87573	10.034	9.25422	9.24049	10.4883	8.99257	9.74985	10.7447	10.5532	10.8336
2.07868	2.38996	2.38996	2.38996	2.62851	2.38996	2.49061	5.13062	5.17691	5.87734	4.29443	5.38771	4.23361	4.29443	5.10206	4.45599	4.48866	4.34694	4.70148	4.70148	4.43823	4.76603	4.70183	4.70622	4.70436	4.43728	4.48178
6.03494	6.60324	5.80964	5.83675	7.01485	6.02531	6.10036	7.46796	7.46796	7.98156	8.3515	7.41778	7.60152	7.71636	7.90947	7.8216	8.50506	7.3455	7.48354	7.32078	7.12342	7.61576	7.76499	7.48349	7.58309	8.15282	8.38478
8.87983	8.22949	7.27095	7.8396	8.71449	8.17051	7.89055	6.81187	6.89034	5.69548	8.33703	5.24543	4.04018	5.64117	7.01686	7.49192	7.2497	7.20161	7.35892	6.96461	5.488	5.79418	6.06511	6.88535	7.79914	6.62896	6.38208
9.87338	9.1384	8.83535	9.55093	8.03534	8.9919	8.32832	8.918	9.4459	8.45704	9.73777	8.73709	9.45985	8.82749	9.85219	9.75375	10.054	9.89387	9.60338	10.7824	9.25639	8.24308	8.583	8.40128	8.69953	8.83264	8.32901
11.4476	11.7116	11.2954	11.7114	11.1236	11.1933	11.1932	10.1128	10.2068	10.9977	10.9419	10.2717	11.0655	10.6794	10.8461	10.5779	10.8456	11.4194	10.9068	11.6943	11.3806	10.6493	11.0262	10.7621	10.9584	10.9453	10.9933
11.3043	11.2849	10.8629	10.8006	11.1411	11.0483	11.3076	11.6019	11.5195	11.8443	11.5419	11.5233	11.8284	11.756	11.8532	11.6563	11.7421	11.0389	11.2736	10.336	10.6106	10.4427	10.6358	11.4509	11.9514	11.9887	11.756
9.11969	9.11731	8.99882	9.18222	8.92461	8.70763	8.78642	9.23513	9.28375	9.99154	9.35419	9.5332	9.91783	9.442	9.43599	9.03106	9.20029	9.23524	8.90337	9.29019	9.03877	8.67581	8.59064	8.82809	9.16643	9.07582	9.38357
11.295	11.1665	11.0243	11.15	10.8086	10.6713	10.4536	10.3902	10.4569	10.7043	10.5434	10.4292	10.9298	11.015	11.0101	10.6713	10.8519	11.1065	10.4472	10.969	10.8064	9.62384	10.5095	10.4988	10.3712	10.6191	10.6746
7.3962	7.16872	7.3382	7.96011	6.52124	7.26607	6.93507	5.29806	5.90344	2.80266	6.73143	5.86509	7.08735	6.26054	5.99273	6.02891	6.76485	7.11174	6.61205	7.15053	6.65698	4.48785	6.83968	6.10242	6.73216	6.63708	6.68872
6.04369	5.56775	6.37864	6.26435	4.22406	4.63812	3.11433	7.33242	8.23564	8.18221	8.02855	7.39196	9.07152	7.60987	7.47596	8.37799	9.41448	9.03308	8.08418	9.15376	8.02613	7.24527	7.62052	7.24527	7.24527	7.00332	6.47883
2.41886	2.65381	11.3582	10.6443	6.38542	11.5598	10.8036	7.69339	6.23549	6.49544	7.76663	7.71995	2.71123	7.60542	4.62203	3.29045	1.8278	4.36485	5.13228	2.84953	7.44857	6.92382	7.27578	8.59297	3.035	6.47627	7.81101
10.4758	10.1554	10.367	10.5077	9.8053	10.1199	9.91024	10.4073	11.2798	9.91472	11.013	10.6866	11.4598	10.7271	10.4813	11.2965	11.1456	11.0595	10.4992	10.8808	10.5522	10.1916	10.2641	10.2833	10.2623	10.8773	10.0498
11.833	11.721	11.2605	11.1905	11.9213	11.7653	10.4666	8.76827	9.52993	9.07704	8.99387	9.28885	8.57629	8.8757	8.53876	9.87862	9.93218	10.6853	10.7507	9.9413	10.2076	8.92136	10.6844	9.22609	10.4056	10.1172	10.2667
12.1805	11.8202	11.6502	11.7046	11.863	11.869	11.8261	11.5671	10.694	9.73475	10.4766	10.9416	10.5338	11.2589	12.016	11.0211	11.1775	10.7041	11.5167	11.3434	10.6671	9.9272	11.2568	11.0206	11.7737	11.1222	11.6169
9.06517	9.32989	8.92245	9.39167	7.96304	8.5434	8.84571	9.63745	9.05187	8.20893	8.26759	9.66385	9.92136	9.65871	10.4988	8.71767	9.38944	9.1952	9.2511	9.69902	8.87202	7.80516	8.63912	9.06595	9.54137	9.33494	8.8906
10.5546	10.3366	9.86685	10.0491	8.66446	9.53412	9.07946	10.3317	11.0226	10.1278	10.7536	10.4005	11.6417	10.1857	9.59018	11.4414	11.2981	11.8934	10.5595	10.6943	11.1343	10.049	10.4389	10.2764	10.3449	10.6939	10.0469
7.95508	8.26471	7.94896	8.75003	8.52556	8.46132	8.35855	8.86993	8.98449	9.40044	9.4911	9.38802	9.77626	9.45502	9.56986	8.97018	9.50827	9.29687	9.53992	9.7659	9.86536	9.47354	9.71453	9.34536	8.82124	9.20478	8.79015
9.38136	9.4549	9.13392	9.40144	8.84015	8.81055	8.50251	5.76153	6.23452	5.72024	5.39259	5.46336	5.05565	5.5822	6.01992	5.72024	5.36978	6.1254	6.18316	6.03691	6.03423	5.90311	6.10928	5.38561	6.10319	5.86391	5.31881
4.41368	4.84956	4.84956	4.49736	5.83624	5.09741	4.84956	5.50647	4.90096	6.88675	6.43322	6.43102	4.98698	5.84771	6.88754	5.26739	5.45559	4.96732	4.93855	5.12471	5.93361	5.63016	5.74104	5.55774	5.2236	5.56767	5.90208
4.43301	4.79166	4.43301	4.9031	4.45529	3.98508	4.43301	5.62231	5.68252	6.12868	5.7819	6.68704	6.24197	5.54889	6.33211	6.26715	5.50379	5.65625	5.71617	5.23683	6.30297	7.09025	6.0944	5.86656	5.39432	5.80017	5.54694
[truncated: 15,583 more rows]

## Sheet: Corrected_Expression
gene_id	gene_name	gene_type	NonLesion_NL1_Affy_Female	NonLesion_rNL2_Affy_Female	NonLesion_NL3_Affy_Female	NonLesion_rNL4_Affy_Female	NonLesion_NL5_Affy_Male	NonLesion_NL8_Affy_Female	NonLesion_NL9_Affy_Male	Normal_NLJ1_Affy_Male	Normal_NLJ2_Affy_Male	Normal_NLJ3_Affy_Male	Normal_NLJ4_Affy_Male	Normal_NLJ5_Affy_Male	Normal_NLJ6_Affy_Female	Normal_NLJ7_Affy_Male	Normal_NLJ8_Affy_Female	Normal_NLJ9_Affy_Female	Normal_NLJ10_Affy_Female	DiscoidLupus_L1_Ovation_Female	DiscoidLupus_L2_Ovation_Female	DiscoidLupus_L3_Ovation_Female	DiscoidLupus_L4_Ovation_Female	DiscoidLupus_L5_Ovation_Male	DiscoidLupus_L8_Ovation_Female	DiscoidLupus_L9_Ovation_Male
[truncated: 10,777 more rows]

[truncated: 1 more sheets: DEG_Table]
