# Supplementary material for: The interferon-rich skin environment regulates Langerhans cell ADAM17 to promote photosensitivity in lupus
Source: eLife. 2024 Jun 11;13:e85914. doi: 10.7554/eLife.85914 (PMC11213570; doi:10.7554/eLife.85914)
Supplement: Supplementary file 2. [file elife-85914-supp2.xlsx]

## Sheet: Data_selection_12_Filtered_Path
Pathway	size	logFC	lowCI	highCI	PValue	FDR	Genes
REACTOME_AMINO_ACID_AND_OLIGOPEPTIDE_SLC_TRANSPORTERS	30	0.976074	0.846267	1.1006	2.48798e-14	3.22193e-11	SLC3A2, SLC7A5, SLC7A8, SLC1A3, SLC7A6, SLC17A7, SLC43A1, SLC7A7, SLC15A2, SLC3A1, SLC6A6, SLC6A15, SLC7A1, SLC1A6, SLC15A1, SLC1A2, SLC1A5, SLC1A4, SLC7A11, SLC5A5, SLC36A1, SLC1A1, SLC38A2, SLC38A1, SLC25A10, SLC15A3, SLC6A14, SLC16A10, SLC38A4, SLC17A5
REACTOME_TRANSPORT_OF_INORGANIC_CATIONS_ANIONS_AND_AMINO_ACIDS_OLIGOPEPTIDES	52	0.695689	0.588267	0.798744	1.29616e-13	8.39264e-11	SLC3A2, SLC7A5, SLC20A1, SLC4A2, SLC20A2, SLC7A8, SLC1A3, SLC7A6, SLC4A4, SLC9A6, SLC34A2, SLC17A7, SLC43A1, SLC12A2, SLC7A7, SLC26A2, SLC15A2, SLC4A1, SLC3A1, SLC4A3, SLC6A6, SLC24A1, SLC26A3, SLC6A15, SLC26A4, SLC7A1, SLC1A6, SLC15A1, SLC4A7, SLC9A2, SLC1A2, SLC1A5, SLC12A4, SLC9A1, SLC1A4, SLC7A11, SLC5A5, SLC9A8, SLC36A1, SLC1A1, SLC38A2, SLC12A7, SLC38A1, SLC25A10, SLC24A3, SLC15A3, SLC6A14,…
REACTOME_MHC_CLASS_II_ANTIGEN_PRESENTATION	68	-0.615895	0.72678	0.509521	3.23963e-13	1.39844e-10	ARF1, CANX, AP2B1, AP2M1, CLTC, CTSA, DYNLL1, ACTR1A, CTSD, CTSB, DCTN2, SEC31A, CLTA, DCTN1, LGMN, CTSC, KIF5B, AP2S1, ACTR1B, KIF22, DNM2, CTSH, SEC24C, SEC24D, CTSK, SEC24B, CTSS, KIF2A, DCTN6, AP1S2, KIFAP3, AP1G1, KIF3C, DYNC1LI2, CTSF, CTSO, DYNC2LI1, KIF3B, DCTN3, SEC23A, KIF11, KIF23, SPTBN2, AP1S1, DYNC1I1, AP1B1, SH3GL2, SEC13, OSBPL1A, DCTN5, KIF2C, CD74, DYNC1I2, AP2A2, DYNC1H1, RAB7A…
REACTOME_GENERIC_TRANSCRIPTION_PATHWAY	193	0.396333	0.334634	0.459323	9.78747e-13	3.16869e-10	THRA, ESRRA, UBE2D3, NCOR1, TRIM28, USP9X, HDAC1, JUNB, SNW1, NR3C1, TBL1X, CCNC, WWTR1, CREBBP, KAT2A, E2F4, NR4A1, MAML1, RXRA, MYC, NOTCH2, SMAD4, MED14, SERPINE1, MEN1, SMAD2, CDK9, NOTCH3, TGIF1, MED1, MED12, ZNF263, ZKSCAN5, RARA, KAT2B, NR1H3, PPM1A, ZNF212, SMARCD3, TFDP1, RARG, VDR, SKI, TEAD4, ZNF202, MED7, ZNF140, NR4A2, CCNT2, SMAD7, CDK8, ZNF274, MAMLD1, ZNF324, ESR1, NOTCH4, NR3C2, …
REACTOME_AMINO_ACID_TRANSPORT_ACROSS_THE_PLASMA_MEMBRANE	19	1.09356	0.901464	1.28824	3.30448e-12	8.18169e-10	SLC3A2, SLC7A5, SLC7A8, SLC7A6, SLC43A1, SLC7A7, SLC3A1, SLC6A6, SLC6A15, SLC7A1, SLC1A5, SLC1A4, SLC7A11, SLC36A1, SLC38A2, SLC38A1, SLC6A14, SLC16A10, SLC38A4
BIOCARTA_RNA_PATHWAY	10	1.29098	1.15667	1.42269	3.7939e-12	8.18169e-10	EIF2S1, NFKBIA, TP53, RELA, EIF2AK2, MAP3K14, DNAJC3, EIF2S2, NFKB1, CHUK
REACTOME_RNA_POL_I_RNA_POL_III_AND_MITOCHONDRIAL_TRANSCRIPTION	74	0.62144	0.546668	0.693172	4.42254e-12	8.18169e-10	CBX3, H3F3B, H2AFZ, SSB, ERCC3, EHMT2, GTF2H1, MBD2, POLR2L, POLR2K, UBTF, HIST2H2BE, TBP, TFAM, MNAT1, GTF2H4, BRF1, POLRMT, KAT2B, TAF1C, SNAPC3, CCNH, SNAPC2, GTF3C2, POLR3F, H2AFX, SNAPC1, SNAPC4, HIST4H4, HIST1H3B, TAF1A, POU2F1, POLR1C, HIST1H4H, POLR3D, HIST1H2BI, HIST1H2BE, HIST1H2BH, HIST1H3C, HIST1H2AJ, PTRF, NFIB, POLR2H, POLR3C, POLR2F, HIST1H2BK, HIST1H2BD, HIST1H2BG, CDK7, MAPK3, SN…
REACTOME_TRANSPORT_OF_GLUCOSE_AND_OTHER_SUGARS_BILE_SALTS_AND_ORGANIC_ACIDS_METAL_IONS_AND_AMINE_COMPOUNDS	46	0.637693	0.529193	0.743325	6.35495e-12	1.02871e-09	SLC2A1, SLC39A6, SLC16A1, SLC2A3, SLC39A7, SLC16A3, HEPH, SLC31A1, SLC2A5, CP, SLC22A18, SLC22A5, SLC6A1, SLC13A3, SLC22A3, SLC14A1, SLC18A2, SLC22A4, SLC6A6, SLC6A15, SLC5A1, SLC30A3, SLC6A9, SLC6A11, SLC16A7, SLC5A2, SLC39A8, SLC6A2, SLC11A1, RHAG, SLC30A1, SLC5A3, SLC2A8, SLC30A5, SLC39A4, SLC47A1, RHCG, SLC6A14, SLC2A9, SLC2A6, SLC39A2, SLC16A8, SLC22A7, SLC2A10, SLC22A8, SLC44A1
REACTOME_TRANSCRIPTION	148	0.38328	0.321687	0.442368	8.5982e-12	1.23718e-09	CBX3, SRSF9, TAF10, RNPS1, H3F3B, TCEB2, SRSF11, SRSF2, H2AFZ, SSRP1, SRSF7, SSB, SRRM1, SUPT5H, SUPT4H1, NCBP2, PABPN1, SRSF4, SRSF1, POLR2B, TAF9, ERCC3, CSTF1, POLR2G, EHMT2, GTF2F1, GTF2H1, MBD2, SNRPD3, NFX1, POLR2L, POLR2K, GTF2A2, GTF2E2, RNMT, UBTF, NUDT21, HIST2H2BE, POLR2A, TCEB3, TCEB1, U2AF1, SRSF3, TBP, TFAM, CDK9, SNRPE, CDC40, PCF11, SRSF5, MNAT1, TAF6, GTF2H4, POLR2D, BRF1, POLRMT…
REACTOME_SEMAPHORIN_INTERACTIONS	60	0.565137	0.464093	0.662074	1.15989e-11	1.50205e-09	CFL1, RHOA, HSP90AB1, DPYSL2, RHOC, MYL9, ARHGEF12, DPYSL3, MYH11, ARHGAP35, LIMK2, CRMP1, ROCK2, ARHGEF11, RHOG, TLN1, MET, SEMA4D, PLXNA3, TYROBP, CDK5, LIMK1, FARP2, CDK5R1, SEMA5A, FES, DPYSL4, PLXNB3, PLXNC1, SEMA3A, SEMA3E, PTPRC, PLXNA2, RAC2, RAC1, CDC42, PAK2, PAK1, RND1, FYN, HSP90AA1, NRP1, ERBB2, MYH9, ITGB1, RHOB, PLXND1, MYH10, PIP5K1C, RRAS, ROCK1, MYL6, ITGA1, SEMA6A, PLXNB1, CD72…
KEGG_MTOR_SIGNALING_PATHWAY	43	0.479038	0.365339	0.593851	1.32737e-11	1.51454e-09	RPS6, HIF1A, PIK3R2, EIF4E, RHEB, PIK3R3, DDIT4, RPS6KA1, VEGFB, RPS6KB2, RPS6KA3, PIK3CD, ULK2, RPS6KB1, STK11, PIK3CA, PDPK1, RPS6KA2, BRAF, PIK3CG, FIGF, AKT1, MAPK1, ULK1, TSC1, EIF4E2, IGF1, PGF, PRKAA1, VEGFC, VEGFA, EIF4B, MAPK3, PIK3R1, AKT3, PIK3CB, TSC2, CAB39, PIK3R5, MLST8, CAB39L, EIF4EBP1, STRADA
REACTOME_VOLTAGE_GATED_POTASSIUM_CHANNELS	14	0.692136	0.566844	0.814121	1.40344e-11	1.51454e-09	KCNAB2, KCNQ1, KCNA6, KCNS3, KCNA5, KCND2, KCNA3, KCNS1, KCNC1, KCNAB1, KCNF1, KCNB1, KCND3, KCNH6
REACTOME_RECEPTOR_LIGAND_BINDING_INITIATES_THE_SECOND_PROTEOLYTIC_CLEAVAGE_OF_NOTCH_RECEPTOR	7	0.814286	0.682921	0.948395	3.97293e-11	3.95765e-09	NOTCH2, ADAM10, NOTCH3, NOTCH4, ADAM17, JAG1, JAG2
SIG_CHEMOTAXIS	39	0.379237	0.299727	0.460413	6.06115e-11	5.60656e-09	GDI2, CFL1, ACTR2, ACTR3, ITPR3, INPPL1, GDI1, ARHGAP1, MYLK, ITPR2, ROCK2, ARHGEF11, PAK4, ITPR1, PIK3CD, PTEN, WASF1, LIMK1, PIK3CA, ARHGAP4, PDPK1, BTK, WASL, PIK3CG, RHO, AKT1, PITX2, CDC42, PAK2, PAK1, PIK3R1, AKT3, ANGPTL2, ROCK1, PAK3, PPP1R13B, PAK6, PIK3R5, RACGAP1
REACTOME_ENERGY_DEPENDENT_REGULATION_OF_MTOR_BY_LKB1_AMPK	13	0.71166	0.619799	0.804756	7.32654e-11	6.32525e-09	RHEB, PRKAG1, PRKAB1, PPM1A, STK11, TSC1, PRKAA1, PRKAB2, PRKAG2, TSC2, CAB39, CAB39L, STRADA
REACTOME_PRE_NOTCH_EXPRESSION_AND_PROCESSING	30	0.386454	0.296065	0.475471	9.45978e-11	7.25775e-09	TMED2, RAB6A, JUN, SNW1, TP53, B4GALT1, FURIN, SEL1L, CREBBP, KAT2A, EP300, MAML1, NOTCH2, NOTCH3, E2F3, KAT2B, TFDP1, MFNG, MAMLD1, NOTCH4, ATP2A1, ATP2A3, RBPJ, CCND1, ATP2A2, ST3GAL6, POFUT1, RFNG, TNRC6B, POGLUT1
REACTOME_SIGNALING_BY_TGF_BETA_RECEPTOR_COMPLEX	55	0.593988	0.474555	0.715925	9.52755e-11	7.25775e-09	RHOA, UBE2D3, FKBP1A, PPP1CC, PPP1CA, NCOR1, STRAP, USP9X, HDAC1, PPP1CB, JUNB, FURIN, CCNC, PPP1R15A, WWTR1, PRKCZ, E2F4, MYC, SMAD4, SERPINE1, MEN1, SMAD2, CDK9, TGIF1, PPM1A, TFDP1, SKI, CCNT2, SMAD7, CDK8, ZFYVE9, RBL1, SMAD3, SMURF2, SKIL, TGFBR1, CCNT1, TGFBR2, CDKN2B, NCOR2, PARP1, XPO1, PARD3, TRIM33, UBE2D1, MTMR4, SMURF1, ARHGEF18, SP1, TGIF2, PMEPA1, STUB1, UCHL5, E2F5, F11R
REACTOME_OTHER_SEMAPHORIN_INTERACTIONS	13	0.97018	0.814254	1.12937	1.06996e-10	7.69775e-09	TYROBP, SEMA5A, PLXNB3, PLXNC1, SEMA3E, PLXNA2, ITGB1, PLXND1, ITGA1, SEMA6A, SEMA4A, TREM2, PLXNA1
PID_ALK2_PATHWAY	8	0.900191	0.738638	1.05864	1.15493e-10	7.87177e-09	FKBP1A, SMAD4, ACVR1, SMAD5, SMAD1, BMP7, BMPR2, TLX2
REACTOME_SEMA3A_PAK_DEPENDENT_AXON_REPULSION	14	0.890146	0.771613	1.00387	1.33136e-10	8.49742e-09	CFL1, HSP90AB1, PLXNA3, LIMK1, FES, SEMA3A, PLXNA2, RAC1, PAK2, PAK1, FYN, HSP90AA1, NRP1, PLXNA1
BIOCARTA_ECM_PATHWAY	24	-0.615054	0.749146	0.483546	1.37796e-10	8.49742e-09	RHOA, PFN1, GSN, PXN, RAF1, SHC1, MYLK, MAP2K1, TLN1, PIK3CA, PIK3CG, PTK2, MAPK1, DIAPH1, MYL2, FYN, ITGB1, MAPK3, PIK3R1, HRAS, ROCK1, SRC, ITGA1, ARHGAP5
REACTOME_INTEGRATION_OF_PROVIRUS	8	0.589643	0.472219	0.704807	1.60326e-10	9.43737e-09	XRCC6, PPIA, XRCC4, PSIP1, HMGA1, LIG4, XRCC5, BANF1
BIOCARTA_CALCINEURIN_PATHWAY	16	1.00433	0.822554	1.17872	1.81438e-10	9.80367e-09	CALM2, MARCKS, CDKN1A, PPP3CA, PPP3CB, GNAQ, PLCG1, NFATC4, PPP3CC, NFATC3, PRKCB, NFATC1, PRKCA, SP3, CALM1, SP1
REACTOME_COLLAGEN_FORMATION	40	-0.878707	1.05181	0.710185	1.8169e-10	9.80367e-09	P4HB, PLOD1, PPIB, CRTAP, COL6A3, COL3A1, PLOD3, COL1A1, COL1A2, PCOLCE, PLOD2, BMP1, COL5A1, COL15A1, COL7A1, COL11A1, COL16A1, COL17A1, COL9A3, COL10A1, SERPINH1, COL21A1, COL6A2, COL13A1, COL4A2, COL4A1, COL6A1, COL14A1, COL4A5, COL9A2, COL4A6, ADAMTS2, COL4A4, ADAMTS3, TLL2, COL11A2, COL5A3, PCOLCE2, COL5A2, COL8A2
REACTOME_RNA_POL_I_TRANSCRIPTION	45	0.695966	0.592287	0.801819	1.90699e-10	9.87819e-09	CBX3, H3F3B, H2AFZ, ERCC3, EHMT2, GTF2H1, MBD2, POLR2K, UBTF, HIST2H2BE, MNAT1, GTF2H4, KAT2B, TAF1C, CCNH, H2AFX, HIST4H4, HIST1H3B, TAF1A, POLR1C, HIST1H4H, HIST1H2BI, HIST1H2BE, HIST1H2BH, HIST1H3C, HIST1H2AJ, PTRF, POLR2H, HIST1H2BK, HIST1H2BD, HIST1H2BG, CDK7, MAPK3, H3F3A, HIST2H2AA3, HIST1H4J, HIST1H2AE, HIST1H4I, TAF1B, HIST1H2AC, GTF2H2B, POLR1D, POLR1B, GTF2H3, RRN3
REACTOME_RNA_POL_II_TRANSCRIPTION_PRE_INITIATION_AND_PROMOTER_OPENING	38	0.459793	0.385596	0.530977	2.16168e-10	1.07668e-08	TAF10, POLR2B, TAF9, ERCC3, POLR2G, GTF2F1, GTF2H1, POLR2L, POLR2K, GTF2A2, GTF2E2, POLR2A, TBP, MNAT1, TAF6, GTF2H4, POLR2D, CCNH, GTF2E1, TAF13, GTF2A1, GTF2B, POLR2C, POLR2H, TAF11, TAF12, POLR2F, GTF2F2, TAF5, CDK7, POLR2J, POLR2I, TAF4, POLR2E, GTF2H2B, TAF4B, TAF1, GTF2H3
BIOCARTA_CARM_ER_PATHWAY	30	0.574172	0.472744	0.671479	2.80034e-10	1.34313e-08	HDAC1, PHB2, HDAC2, SPEN, CREBBP, ERCC3, EP300, GTF2F1, HDAC5, NRIP1, POLR2A, TBP, MED1, HDAC4, BRCA1, ESR1, HDAC9, GTF2E1, GTF2A1, NR0B1, HDAC6, NCOR2, MEF2C, CCND1, CARM1, PELP1, HDAC3, HDAC7, PPARGC1A, HDAC11
BIOCARTA_BARRESTIN_SRC_PATHWAY	14	-0.890152	1.08694	0.70136	3.23159e-10	1.49461e-08	GNB1, GNAS, RAF1, MAP2K2, MAP2K1, HCK, MAPK1, PLCB1, MAPK3, HRAS, ADCY1, SRC, DNM1, ARRB1
REACTOME_SLC_MEDIATED_TRANSMEMBRANE_TRANSPORT	142	0.518428	0.440157	0.593526	3.43392e-10	1.53342e-08	HK1, SLC3A2, SLC7A5, SLC2A1, RAE1, RANBP2, TPR, SLC29A1, SLC20A1, SLC39A6, NUP153, SLC4A2, NUP62, NUP214, NUP133, NUP93, SLC16A1, SLC2A3, SLC39A7, SLC20A2, SLC7A8, SLC1A3, SLC37A4, SLC16A3, NUP88, HK2, SLC33A1, SLC35A1, SLCO2B1, SLC7A6, HEPH, SLC4A4, SLC9A6, SLC31A1, NUPL2, SLC5A6, SLC34A2, SLC17A7, SLCO2A1, SLC43A1, SLC12A2, SLC2A5, SLC7A7, SLC29A2, CP, SLC22A18, SLC22A5, POM121, SLC26A2, SLC6A1…
PID_S1P_S1P4_PATHWAY	14	0.817442	0.669383	0.959492	4.07959e-10	1.76102e-08	RHOA, GNAI2, GNAI3, PLCG1, GNAO1, GNAZ, S1PR4, GNA13, MAPK1, CDC42, GNAI1, MAPK3, S1PR5, GNA12
REACTOME_SIGNALING_BY_RHO_GTPASES	83	0.444679	0.375881	0.514918	4.65132e-10	1.94305e-08	GDI2, RHOA, RHOC, ARHGDIA, ARHGDIB, ARHGEF12, PIK3R2, NET1, GDI1, ARHGAP35, ARHGAP1, BCR, RALBP1, ARHGEF11, FAM13A, RHOG, ARHGEF9, OCRL, ARHGEF17, ARHGAP29, ARHGAP4, ARHGAP11A, FGD1, ARHGAP25, RHOH, ARHGAP26, ARHGEF4, ARHGAP44, ARHGAP8, ARHGAP6, VAV1, ARHGAP22, OPHN1, G3BP2, TIAM1, STARD8, RAC2, CHN2, ARHGAP12, ARHGEF2, ARHGEF16, TRIO, AKAP13, RAC1, CDC42, ITSN1, ARHGEF6, SRGAP3, RHOD, DLC1, SOS2…
REACTOME_NRAGE_SIGNALS_DEATH_THROUGH_JNK	32	0.680685	0.569886	0.786983	5.02778e-10	2.03468e-08	BAD, ARHGEF12, NET1, ARHGEF11, ARHGEF9, ARHGEF17, ARHGAP4, FGD1, ARHGEF4, NGFR, VAV1, TIAM1, ARHGEF2, ARHGEF16, TRIO, AKAP13, RAC1, MAGED1, AATF, ITSN1, ARHGEF6, SOS2, SOS1, ABR, ARHGEF18, FGD2, ARHGEF3, VAV3, ECT2, TIAM2, OBSCN, BCL2L11
REACTOME_SIGNALING_BY_NODAL	12	0.667999	0.510213	0.823395	5.37252e-10	2.05689e-08	FURIN, SMAD4, SMAD2, DRAP1, FOXO3, ACVR1B, ACVR2A, SMAD3, TDGF1, PCSK6, FOXH1, ACVR2B
KEGG_LYSINE_DEGRADATION	33	0.606503	0.507567	0.707513	5.40032e-10	2.05689e-08	PLOD1, HADH, ECHS1, OGDH, ALDH2, ALDH9A1, ALDH3A2, AASDHPPT, PLOD3, EHMT2, PLOD2, SETDB1, GCDH, EHHADH, BBOX1, ACAT1, SETMAR, HADHA, ALDH7A1, WHSC1, ACAT2, ALDH1B1, AASS, SETD2, SETD1B, SETD1A, DLST, WHSC1L1, ASH1L, SUV39H1, NSD1, EHMT1, PIPOX
NABA_COLLAGENS	28	-0.815563	0.986727	0.648923	5.90511e-10	2.18489e-08	COL6A3, COL3A1, COL1A1, COL1A2, COL5A1, COL15A1, COL7A1, COL11A1, COL16A1, COL17A1, COL9A3, COL10A1, COL21A1, COL18A1, COL6A2, COL13A1, COL4A2, COL4A1, COL6A1, COL14A1, COL4A5, COL9A2, COL4A6, COL4A4, COL11A2, COL5A3, COL5A2, COL8A2
REACTOME_SYNTHESIS_OF_PIPS_AT_THE_PLASMA_MEMBRANE	27	0.358516	0.263718	0.455301	6.27869e-10	2.25859e-08	PIP4K2B, PIK3R2, INPPL1, MTMR3, PIK3R3, INPP5K, PIK3CD, PTEN, MTM1, PIK3CA, PIK3C2B, INPP4B, PIP4K2A, PIP5K1B, PIK3CG, PI4K2A, SYNJ2, PIK3R1, PIP5K1C, PIK3CB, SYNJ1, PIK3C2A, MTMR1, MTMR6, PIK3C2G, PIK3R5, MTMR14
PID_ATM_PATHWAY	31	0.351555	0.267488	0.434502	6.74551e-10	2.30498e-08	TRIM28, UBE2N, SMC1A, ABL1, NBN, TP53BP1, MDC1, RNF8, RBBP8, CTBP1, TERF2, BID, BRCA1, CDC25A, RAD9A, TOP3A, XRCC4, CDC25C, MRE11A, H2AFX, BLM, KAT5, RAD17, RAD50, ATM, YWHAB, SMC3, CHEK2, MDM2, DCLRE1C, UIMC1
REACTOME_RNA_POL_I_TRANSCRIPTION_TERMINATION	18	0.502608	0.380098	0.621881	6.76366e-10	2.30498e-08	ERCC3, GTF2H1, POLR2K, UBTF, MNAT1, GTF2H4, TAF1C, CCNH, TAF1A, POLR1C, PTRF, POLR2H, CDK7, TAF1B, GTF2H2B, POLR1D, POLR1B, GTF2H3
PID_P38_MKK3_6PATHWAY	25	-0.523093	0.635213	0.408626	7.46978e-10	2.45115e-08	MAPK14, MAP3K3, GADD45A, MAP3K5, TAB1, MAP3K4, GADD45G, TRAF2, TAOK2, TRAF6, MAP2K6, MAP3K10, MAP3K7, GADD45B, MAP2K3, ATM, RAC1, TXN, CAMK2B, TAB2, MAPK11, MAP3K1, TAOK1, MAP3K6, TAOK3
REACTOME_SEMA4D_INDUCED_CELL_MIGRATION_AND_GROWTH_CONE_COLLAPSE	23	0.748468	0.626858	0.872622	7.57111e-10	2.45115e-08	RHOA, RHOC, MYL9, ARHGEF12, MYH11, LIMK2, ROCK2, ARHGEF11, RHOG, SEMA4D, LIMK1, RAC2, RAC1, CDC42, RND1, ERBB2, MYH9, RHOB, MYH10, ROCK1, MYL6, PLXNB1, MYH14
REACTOME_TRANSCRIPTIONAL_ACTIVITY_OF_SMAD2_SMAD3_SMAD4_HETEROTRIMER	34	0.704857	0.549433	0.853964	8.27455e-10	2.61355e-08	UBE2D3, NCOR1, USP9X, HDAC1, JUNB, CCNC, WWTR1, E2F4, MYC, SMAD4, SERPINE1, MEN1, SMAD2, CDK9, TGIF1, PPM1A, TFDP1, SKI, CCNT2, SMAD7, CDK8, RBL1, SMAD3, SMURF2, SKIL, CCNT1, CDKN2B, NCOR2, PARP1, TRIM33, UBE2D1, SP1, TGIF2, E2F5
REACTOME_RNA_POL_I_TRANSCRIPTION_INITIATION	20	0.428717	0.315462	0.538978	1.13669e-09	3.46022e-08	ERCC3, EHMT2, GTF2H1, POLR2K, UBTF, MNAT1, GTF2H4, KAT2B, TAF1C, CCNH, TAF1A, POLR1C, POLR2H, CDK7, TAF1B, GTF2H2B, POLR1D, POLR1B, GTF2H3, RRN3
REACTOME_DOWNSTREAM_SIGNALING_EVENTS_OF_B_CELL_RECEPTOR_BCR	83	0.253519	0.175699	0.332974	1.16665e-09	3.46022e-08	BAD, PSMB2, SKP1, PSMB7, PSME1, PSMD8, PSMD2, PSMB1, PSMD4, PSMF1, PSMC2, PSMA7, PSMD1, PSMD13, PSMC4, PSMC3, PSMA5, PSMA2, PSMD3, PSMB3, NFKBIA, PSMA3, PSMA1, PSMC6, PSMD7, PSME2, RELA, GSK3A, PSMB4, CDKN1A, NR4A1, PSMD12, NRAS, PSMB10, PSMA6, FOXO1, PSMD6, PSMA4, PSMD5, RPS6KB2, NFKBIE, CASP9, KRAS, PTEN, FOXO3, PSMC1, PSMB9, CREB1, PDPK1, BTRC, BCL10, FOXO4, RASGRP1, RASGRP3, REL, MAP3K7, AKT1…
REACTOME_PROCESSING_OF_INTRONLESS_PRE_MRNAS	11	0.636696	0.501191	0.770891	1.17567e-09	3.46022e-08	NCBP2, PABPN1, CSTF1, NUDT21, PCF11, CSTF3, CLP1, CSTF2, PAPOLA, NCBP1, CPSF7
REACTOME_NEURONAL_SYSTEM	150	0.319561	0.26075	0.375988	1.22979e-09	3.53907e-08	AP2B1, AP2M1, CALM2, GLUL, GNB1, GNB2, GNAI2, GNAI3, RAF1, ALDH2, VAMP2, GNG10, AP2S1, STXBP1, NSF, SNAP25, DLG1, PRKACB, SLC1A3, UNC13B, GABBR1, GLS, MYO6, ARHGEF9, STX5, RPS6KA1, KCNAB2, STX7, STX4, ALDH5A1, ADCY7, RPS6KA3, ACTN2, GNB5, PLCB2, GNG11, SLC17A7, CREB1, MAOA, KCNN4, KCNQ1, ADCY9, PDPK1, KCNK1, STX8, PANX1, PICK1, RPS6KA2, RAB3A, SLC6A1, KCNJ8, GRIA2, GLS2, KCNA6, SLC18A2, KCNN3, KC…
PID_RANBP2_PATHWAY	11	0.922941	0.756655	1.09013	1.47945e-09	4.15334e-08	RAN, HDAC1, RANBP2, HDAC4, UBE2I, SUMO1, XPO1, RANGAP1, PIAS2, MDM2, PIAS1
BIOCARTA_INTEGRIN_PATHWAY	34	-0.669047	0.823805	0.518376	1.51977e-09	4.15334e-08	CAPNS1, RHOA, CAPN1, ZYX, VCL, PXN, RAF1, JUN, SHC1, PPP1R12B, BCR, CSK, RAP1A, MAP2K2, MAP2K1, CAV1, TLN1, ACTN2, ACTA1, CRKL, ACTN3, PTK2, MAPK1, ACTN1, FYN, ITGB1, MAPK3, SOS1, HRAS, ROCK1, SRC, ITGA1, GRB2, TNS1
KEGG_BASAL_TRANSCRIPTION_FACTORS	31	0.486002	0.397836	0.576017	1.57116e-09	4.15334e-08	TAF10, TAF7, TAF9, GTF2F1, GTF2H1, GTF2A2, GTF2E2, TBP, TAF6, GTF2H4, GTF2E1, TAF6L, TAF13, GTF2A1, GTF2B, TBPL1, TAF11, TAF12, TAF2, GTF2F2, TAF5, GTF2I, TAF4, STON1, TAF5L, TAF4B, TAF1, GTF2IRD1, TAF7L, TAF9B, GTF2H3
REACTOME_TRANSMEMBRANE_TRANSPORT_OF_SMALL_MOLECULES	250	0.410923	0.340333	0.478659	1.57153e-09	4.15334e-08	ATP6V0B, ATP6V0E1, PRKAR1A, HK1, GNB1, FTH1, GNAS, GNB2, RAB11A, SLC3A2, ATP6V0C, ATP6V1B2, SLC7A5, ATP1B1, SLC2A1, ATP6V1F, RAE1, PEX19, RANBP2, TPR, SLC29A1, SLC20A1, GNG10, ATP6V1A, SLC39A6, NUP153, SLC4A2, NUP62, NUP214, NUP133, NUP93, SLC16A1, SLC2A3, SLC39A7, PRKACB, SLC20A2, SLC7A8, SLC1A3, PRKACA, ABCC1, SLC37A4, ABCD3, SLC16A3, ATP6V1C1, NUP88, HK2, SLC33A1, ABCB6, ABCC4, ARHGEF9, ATP1A2…
PID_HES_HEY_PATHWAY	36	0.582206	0.456961	0.702362	1.67688e-09	4.34311e-08	YY1, NCOR1, HIF1A, HDAC1, SPEN, CREBBP, EP300, MAML1, TCF3, GAA, RB1, TLE1, RBBP8, CTBP1, HES1, CD4, KDR, MYB, GHR, JAK2, NCOR2, RBPJ, RCAN1, PARP1, ID1, STAT3, NCOA1, CDKN1B, GATA6, ARNT, AR, KDM1A, TWIST1, HEY1, NOTCH1, HEY2
REACTOME_P53_DEPENDENT_G1_DNA_DAMAGE_RESPONSE	49	0.383491	0.275971	0.493267	2.08703e-09	5.29943e-08	PSMB2, PSMB7, PSME1, PSMD8, PSMD2, PSMB1, PSMD4, PSMF1, PSMC2, PSMA7, PSMD1, PSMD13, PSMC4, PSMC3, PSMA5, PSMA2, PSMD3, PSMB3, PSMA3, PSMA1, PSMC6, PSMD7, TP53, PSME2, PSMB4, CDKN1A, PSMD12, PSMB10, PSMA6, PSMD6, PSMA4, PSMD5, PSMC1, CDK2, PSMB9, CCNE2, PSMD9, ATM, PSMD11, PSMB5, PSMB6, PSMB8, CDKN1B, PSMC5, PSME4, PSMD14, CCNE1, MDM2, PSMD10
REACTOME_FANCONI_ANEMIA_PATHWAY	12	0.555783	0.407717	0.697832	2.51957e-09	6.2747e-08	USP1, FANCG, FANCA, BRCA1, FANCC, BRCA2, ATM, ATR, FANCL, FANCF, PALB2, FANCE
REACTOME_SYNTHESIS_OF_PIPS_AT_THE_GOLGI_MEMBRANE	15	-0.450646	0.558028	0.341816	2.87625e-09	7.02782e-08	ARF3, ARF1, SACM1L, OCRL, FIG4, PIK3C3, INPP5E, PI4KB, PI4KA, PI4K2A, PIK3R4, PIK3C2A, PIKFYVE, PIK3C2G, VAC14
REACTOME_RNA_POL_II_PRE_TRANSCRIPTION_EVENTS	52	0.381762	0.290067	0.469729	3.06628e-09	7.3534e-08	TAF10, TCEB2, SSRP1, SUPT5H, SUPT4H1, NCBP2, POLR2B, TAF9, ERCC3, POLR2G, GTF2F1, GTF2H1, POLR2L, POLR2K, GTF2A2, GTF2E2, POLR2A, TCEB3, TCEB1, TBP, CDK9, MNAT1, TAF6, GTF2H4, POLR2D, CCNH, CCNT2, CTDP1, GTF2E1, TAF13, GTF2A1, CCNT1, GTF2B, POLR2C, POLR2H, TAF11, TAF12, POLR2F, NCBP1, GTF2F2, TAF5, CDK7, POLR2J, POLR2I, TAF4, POLR2E, GTF2H2B, TAF4B, TCEA1, TAF1, SUPT16H, GTF2H3
REACTOME_ENDOGENOUS_STEROLS	8	1.43889	1.21972	1.64918	3.7619e-09	8.85757e-08	CYP51A1, CYP1B1, CYP19A1, CYP27A1, CYP7B1, CYP21A2, CYP11B2, CYP39A1
REACTOME_AKT_PHOSPHORYLATES_TARGETS_IN_THE_CYTOSOL	10	0.634611	0.52962	0.735341	3.90976e-09	8.91057e-08	BAD, GSK3A, CDKN1A, CASP9, AKT1, CDKN1B, CHUK, AKT3, TSC2, MDM2
REACTOME_CTNNB1_PHOSPHORYLATION_CASCADE	15	-0.719511	0.855108	0.582091	3.92203e-09	8.91057e-08	PPP2R1A, PPP2CB, CTNNB1, PPP2R5C, PPP2R5A, PPP2R5D, PPP2R1B, PPP2R5E, APC, PPP2R5B, CSNK1A1, PPP2CA, FRAT2, AXIN1, FRAT1
REACTOME_TRANSMISSION_ACROSS_CHEMICAL_SYNAPSES	109	0.370965	0.298022	0.445435	4.42894e-09	9.88875e-08	AP2B1, AP2M1, CALM2, GLUL, GNB1, GNB2, GNAI2, GNAI3, RAF1, ALDH2, VAMP2, GNG10, AP2S1, STXBP1, NSF, SNAP25, DLG1, PRKACB, SLC1A3, UNC13B, GABBR1, GLS, MYO6, ARHGEF9, RPS6KA1, ALDH5A1, ADCY7, RPS6KA3, ACTN2, GNB5, PLCB2, GNG11, SLC17A7, CREB1, MAOA, ADCY9, PDPK1, PICK1, RPS6KA2, RAB3A, SLC6A1, GRIA2, GLS2, SLC18A2, BRAF, GNAL, CACNA1A, CHRNA1, CHRNB2, CHRNA4, KCNJ2, GAD2, ADCY8, SLC1A6, GNG7, CACN…
REACTOME_DESTABILIZATION_OF_MRNA_BY_TRISTETRAPROLIN_TTP	13	0.341305	0.251912	0.430018	4.95071e-09	1.06837e-07	MAPKAPK2, ZFP36, EXOSC9, TNPO1, YWHAB, EXOSC2, EXOSC7, DCP2, DIS3, EXOSC8, EXOSC5, DCP1A, EXOSC4
REACTOME_RNA_POL_III_TRANSCRIPTION_INITIATION_FROM_TYPE_3_PROMOTER	23	0.620824	0.501931	0.738139	5.02814e-09	1.06837e-07	POLR2L, POLR2K, TBP, SNAPC3, SNAPC2, POLR3F, SNAPC1, SNAPC4, POU2F1, POLR1C, POLR3D, POLR2H, POLR3C, POLR2F, SNAPC5, POLR2E, POLR3E, POLR1D, POLR3K, BRF2, LZTS1, POLR3B, ZNF143
REACTOME_REGULATION_OF_RHEB_GTPASE_ACTIVITY_BY_AMPK	8	0.800337	0.672415	0.924887	5.03246e-09	1.06837e-07	RHEB, PRKAG1, PRKAB1, TSC1, PRKAA1, PRKAB2, PRKAG2, TSC2
BIOCARTA_SPPA_PATHWAY	19	-0.854177	1.08785	0.625294	6.03728e-09	1.23411e-07	GNB1, RAF1, MAP2K1, F2R, PTGS1, SYK, PTK2, PRKCB, TBXAS1, MAPK1, GNAI1, PLA2G4A, PLCB1, ITGB1, MAPK3, HRAS, PRKCA, SRC, ITGA1
REACTOME_CRMPS_IN_SEMA3A_SIGNALING	13	0.613814	0.482044	0.748341	6.05987e-09	1.23411e-07	DPYSL2, DPYSL3, CRMP1, PLXNA3, CDK5, CDK5R1, FES, DPYSL4, SEMA3A, PLXNA2, FYN, NRP1, PLXNA1
KEGG_AXON_GUIDANCE	97	0.360838	0.281085	0.442262	6.09909e-09	1.23411e-07	EPHB3, CFL1, RHOA, DPYSL2, ABLIM1, GNAI2, GNAI3, ARHGEF12, EFNA1, ABL1, LIMK2, PPP3CA, PPP3CB, NRAS, EFNB2, RASA1, EFNB1, ROCK2, EPHB4, PAK4, NCK2, EPHA2, MET, SEMA4D, PLXNA3, CXCL12, SEMA3C, SLIT3, RGS3, KRAS, CDK5, LIMK1, PPP3R1, L1CAM, EPHB6, NCK1, EFNB3, EFNA4, SEMA5A, FES, ABLIM3, NFATC4, PLXNB3, EPHA1, EPHA3, EPHA4, CHP2, PLXNC1, SEMA3A, SEMA3F, SEMA3E, PPP3CC, PLXNA2, NFATC3, RAC2, PTK2, N…
PID_AVB3_INTEGRIN_PATHWAY	64	-0.545568	0.655986	0.439639	6.75652e-09	1.32253e-07	RHOA, VCL, PXN, ILK, SDC1, COL6A3, COL3A1, COL1A1, ITGAV, COL1A2, CSF1R, PTK2B, TLN1, COL5A1, COL15A1, IGF1R, KDR, COL7A1, RPS6KB1, COL11A1, COL16A1, PIK3CA, FGF2, ITGB3, COL17A1, IRS1, COL9A3, PTPN11, COL10A1, PI4KB, PI4KA, CSF1, AKT1, TGFBR2, CASP8, PTK2, MAPK1, RAC1, CDKN1B, COL6A2, IGF1, SPP1, HSP90AA1, FN1, VEGFA, MFGE8, COL13A1, COL4A1, MAPK3, COL6A1, PIK3R1, COL14A1, ROCK1, PIK3C2A, COL4A5…
KEGG_AMINO_SUGAR_AND_NUCLEOTIDE_SUGAR_METABOLISM	34	-0.366645	0.476062	0.260119	6.80463e-09	1.32253e-07	HK1, TSTA3, HEXA, CYB5R3, HEXB, PGM1, CYB5R1, GNPDA1, MPI, GALE, GFPT1, HK2, GALT, PMM2, UGDH, PMM1, GMDS, GNE, GFPT2, FPGT, GALK2, UGP2, CHIT1, GPI, UAP1, PGM3, GMPPA, CMAS, NANS, NAGK, AMDHD2, UXS1, GMPPB, NPL
REACTOME_G_ALPHA1213_SIGNALLING_EVENTS	52	0.44248	0.324364	0.555796	6.84243e-09	1.32253e-07	RHOA, GNB1, GNB2, RHOC, ARHGEF12, PIK3R2, NET1, GNG10, PIK3R3, ROCK2, ARHGEF11, ARHGEF1, RHOG, ARHGEF9, ARHGEF17, GNB5, GNG11, PIK3CA, ARHGAP4, FGD1, ARHGEF4, VAV1, TIAM1, GNG7, GNA13, GNG5, RAC2, TBXA2R, ARHGEF2, ARHGEF16, TRIO, AKAP13, RAC1, CDC42, ITSN1, ARHGEF6, SOS2, RHOB, PIK3R1, GNG12, SOS1, ABR, ARHGEF18, ROCK1, FGD2, PLXNB1, ARHGEF3, VAV3, ECT2, TIAM2, OBSCN, GNA12
REACTOME_ANTIVIRAL_MECHANISM_BY_IFN_STIMULATED_GENES	58	0.486401	0.356414	0.611102	7.09053e-09	1.34583e-07	UBA7, EIF4G2, STAT1, KPNA2, EIF4A3, EIF4E, UBE2N, RAE1, JAK1, UBE2L6, RANBP2, TPR, ARIH1, EIF4G3, KPNA1, MX1, NUP153, NUP62, NUP214, NUP133, NUP93, IRF3, PLCG1, NUP88, PIN1, IFIT1, NUPL2, EIF2AK2, MX2, POM121, ISG15, KPNA5, NUP155, TRIM25, FLNB, EIF4G1, KPNB1, PPM1B, EIF4E2, KPNA4, MAPK3, NUP205, NUP210, UBE2E1, NUP188, NEDD4, NUP50, NUP85, AAAS, NUP54, NUP37, NUP107, DDX58, NUP43, USP18, HERC5, …
REACTOME_DOWNREGULATION_OF_SMAD2_3_SMAD4_TRANSCRIPTIONAL_ACTIVITY	17	0.705843	0.567597	0.845439	7.17082e-09	1.34583e-07	UBE2D3, NCOR1, USP9X, HDAC1, SMAD4, SMAD2, TGIF1, PPM1A, SKI, SMAD3, SMURF2, SKIL, NCOR2, PARP1, TRIM33, UBE2D1, TGIF2
REACTOME_MITOTIC_PROMETAPHASE	70	0.530204	0.376247	0.677899	7.88569e-09	1.45206e-07	RAD21, PPP2R1A, MAPRE1, PPP1CC, RPS27, PAFAH1B1, NUDC, PPP2CB, BUB3, SMC1A, RANBP2, PPP2R5C, CLIP1, BIRC5, NUP133, PPP2R5A, PLK1, STAG1, PMF1, PPP2R5D, CDC20, PPP2R1B, KIF2A, PPP2R5E, MAD2L1, BUB1B, ZWINT, NDC80, PPP2R5B, ZW10, MAD1L1, CENPA, ITGB3BP, KNTC1, SEC13, STAG2, NDEL1, PPP2CA, XPO1, SMC3, KIF2C, AURKB, NSL1, BUB1, SPC25, RANGAP1, CLASP1, CKAP5, APITD1, AHCTF1, CENPI, TAOK1, SKA1, NUP85,…
REACTOME_HIV_LIFE_CYCLE	101	0.254801	0.182765	0.328347	8.01871e-09	1.45206e-07	TAF10, TCEB2, RAN, XRCC6, SSRP1, NMT1, PPIA, SUPT5H, SUPT4H1, NCBP2, RAE1, RANBP2, TPR, TSG101, POLR2B, NUP153, NUP62, NUP214, TAF9, ERCC3, NUP133, NUP93, POLR2G, GTF2F1, GTF2H1, RANBP1, POLR2L, POLR2K, GTF2A2, GTF2E2, RNMT, POLR2A, LIG1, TCEB3, TCEB1, NUP88, TBP, CDK9, CD4, MNAT1, TAF6, GTF2H4, POLR2D, NUPL2, CCNH, RNGTT, CCNT2, FEN1, NMT2, CTDP1, XRCC4, POM121, GTF2E1, PSIP1, TAF13, HMGA1, LIG4…
REACTOME_CDC6_ASSOCIATION_WITH_THE_ORC_ORIGIN_COMPLEX	8	0.528286	0.398422	0.654726	8.07324e-09	1.45206e-07	ORC4, E2F3, CDC6, ORC2, ORC5, ORC1, ORC3, ORC6
SA_G1_AND_S_PHASES	13	0.581131	0.454485	0.710427	8.6298e-09	1.5309e-07	ARF3, CFL1, ARF1, TP53, CDK4, CDKN1A, CDK2, CDKN2A, PRB1, CCND1, CDKN1B, MDM2, NXT1
PID_LIS1_PATHWAY	24	0.543281	0.403643	0.677246	8.90824e-09	1.55894e-07	RHOA, IQGAP1, PAFAH1B1, NUDC, LRPAP1, CLIP1, DYNLT1, ABL1, PPP2R5D, PAFAH1B3, CDK5, CDK5R1, LRP8, KATNA1, RELN, CSNK2A1, PLA2G7, NDEL1, RAC1, CDC42, VLDLR, YWHAE, DYNC1H1, MAP1B
REACTOME_FORMATION_OF_TRANSCRIPTION_COUPLED_NER_TC_NER_REPAIR_COMPLEX	25	0.47558	0.375965	0.576168	1.06954e-08	1.84673e-07	POLR2B, ERCC3, POLR2G, ERCC5, GTF2H1, POLR2L, POLR2K, POLR2A, MNAT1, GTF2H4, POLR2D, ERCC1, CCNH, ERCC8, POLR2C, POLR2H, POLR2F, CDK7, POLR2J, POLR2I, POLR2E, GTF2H2B, TCEA1, XAB2, GTF2H3
REACTOME_ACTIVATED_TAK1_MEDIATES_P38_MAPK_ACTIVATION	15	0.325452	0.243748	0.408867	1.1328e-08	1.92632e-07	MAPKAPK2, IRAK1, MAPK14, MAPKAPK3, TAB1, TRAF6, MAP2K6, MAP3K7, MAP2K3, RIPK2, IKBKG, TAB2, MAPK11, NOD2, NOD1
KEGG_GLYCOSAMINOGLYCAN_BIOSYNTHESIS_HEPARAN_SULFATE	15	0.570233	0.46402	0.67867	1.14538e-08	1.92632e-07	EXT1, EXT2, NDST1, HS2ST1, B3GAT3, NDST2, EXTL1, EXTL3, EXTL2, GLCE, XYLT1, XYLT2, HS3ST2, HS3ST3A1, B4GALT7
REACTOME_CELL_EXTRACELLULAR_MATRIX_INTERACTIONS	13	-0.841935	1.0312	0.650119	1.2221e-08	2.029e-07	ILK, RSU1, VASP, TESK1, PARVB, LIMS1, FLNC, ACTN1, FERMT2, ARHGEF6, ITGB1, LIMS3, PARVA
SA_G2_AND_M_PHASES	8	1.09662	0.878289	1.30919	1.2387e-08	2.03053e-07	CDC25B, CDKN1A, CDK1, CDC25A, CHEK1, NEK1, CDK7, WEE1
KEGG_RNA_DEGRADATION	43	0.231018	0.161959	0.301527	1.25714e-08	2.035e-07	C1D, HSPA9, HSPD1, CNOT1, ENO1, ENO2, CNOT8, LSM3, PAPD7, EDC4, LSM4, LSM5, TTC37, CNOT3, CNOT4, LSM1, SKIV2L, MPHOSPH6, PARN, ENO3, LSM7, DDX6, LSM6, EXOSC9, EXOSC10, PAPOLA, LSM2, EXOSC2, EXOSC7, SKIV2L2, DCP2, DIS3, EXOSC8, WDR61, CNOT2, CNOT6, CNOT7, EXOSC5, DCP1A, EXOSC4, DCPS, PAPOLG, EDC3
BIOCARTA_ATRBRCA_PATHWAY	20	0.748541	0.618755	0.873052	1.27812e-08	2.04341e-07	TP53, NBN, FANCG, RAD1, BRCA1, RAD9A, HUS1, RAD51, FANCC, CHEK1, MRE11A, TREX1, RAD17, BRCA2, RAD50, ATM, ATR, CHEK2, FANCF, FANCE
REACTOME_SEMA4D_IN_SEMAPHORIN_SIGNALING	28	0.511929	0.382814	0.635801	1.30974e-08	2.06844e-07	RHOA, RHOC, MYL9, ARHGEF12, MYH11, ARHGAP35, LIMK2, ROCK2, ARHGEF11, RHOG, MET, SEMA4D, LIMK1, PTPRC, RAC2, RAC1, CDC42, RND1, ERBB2, MYH9, RHOB, MYH10, RRAS, ROCK1, MYL6, PLXNB1, CD72, MYH14
BIOCARTA_CTCF_PATHWAY	21	0.446721	0.338738	0.556964	1.32609e-08	2.06902e-07	TP53, MYC, SMAD4, PTEN, RPS6KB1, PIK3CA, TGFBR3, CD79A, SMAD5, CD79B, PIK3CG, TGFBR1, CDKN2A, TGFBR2, SMAD1, PPP2CA, CDKN1B, TGFB3, TGFB2, PIK3R1, MDM2
REACTOME_IONOTROPIC_ACTIVITY_OF_KAINATE_RECEPTORS	7	1.24309	0.981114	1.50859	1.47878e-08	2.27979e-07	CALM2, DLG1, DLG3, NCALD, CALM1, GRIK2, GRIK5
PID_ERA_GENOMIC_PATHWAY	48	-0.365014	0.478057	0.256568	1.51217e-08	2.30384e-07	SET, SOD1, XBP1, CTSD, NCOR1, ANP32A, PCNA, HDAC1, JUN, PHB2, SAFB, NEDD8, EP300, MTA1, ATP5J, MYC, SMAD4, NRIP1, APBB1, STAT5A, UBE2M, MED1, MPG, CD82, HDAC4, EBAG9, ABCA3, BRCA1, ESR1, AP1B1, NCOA2, GREB1, NR0B1, NCOA3, KLRC3, NCOR2, DDX17, CCND1, CALCOCO1, COL18A1, NCOA1, UBA3, LMO4, HSF2, CHUK, CEBPB, C3, DDX54
REACTOME_RNA_POL_I_PROMOTER_OPENING	24	1.05008	0.83386	1.25753	1.55953e-08	2.34837e-07	H3F3B, H2AFZ, MBD2, UBTF, HIST2H2BE, H2AFX, HIST4H4, HIST1H3B, HIST1H4H, HIST1H2BI, HIST1H2BE, HIST1H2BH, HIST1H3C, HIST1H2AJ, HIST1H2BK, HIST1H2BD, HIST1H2BG, MAPK3, H3F3A, HIST2H2AA3, HIST1H4J, HIST1H2AE, HIST1H4I, HIST1H2AC
REACTOME_AMYLOIDS	34	0.878722	0.669721	1.07924	1.60386e-08	2.38413e-07	H3F3B, APP, GSN, H2AFZ, CST3, TGFBI, HSPG2, B2M, LTF, HIST2H2BE, SNCA, H2AFX, HIST4H4, HIST1H3B, HIST1H4H, HIST1H2BI, HIST1H2BE, HIST1H2BH, HIST1H3C, HIST1H2AJ, HIST1H2BK, HIST1H2BD, NPPA, HIST1H2BG, MFGE8, H3F3A, LYZ, HIST2H2AA3, SAA1, HIST1H4J, HIST1H2AE, HIST1H4I, HIST1H2AC, ITM2B
REACTOME_SYNTHESIS_OF_SUBSTRATES_IN_N_GLYCAN_BIOSYTHESIS	13	-0.510837	0.663343	0.356276	1.63276e-08	2.38413e-07	MPI, DPM1, PMM2, PMM1, DOLK, GFPT2, DPM2, PGM3, GMPPA, ALG5, DPM3, GMPPB, DOLPP1
KEGG_ALDOSTERONE_REGULATED_SODIUM_REABSORPTION	35	0.459668	0.335035	0.586914	1.63851e-08	2.38413e-07	ATP1B1, PIK3R2, SGK1, PIK3R3, ATP1A2, SCNN1A, PIK3CD, KRAS, HSD11B2, ATP1B2, PIK3CA, PDPK1, IRS1, NR3C2, HSD11B1, SCNN1B, FXYD2, PIK3CG, IRS4, INSR, PRKCB, MAPK1, ATP1B3, IRS2, SFN, IGF1, SLC9A3R2, MAPK3, PIK3R1, NEDD4L, PIK3CB, PRKCA, ATP1B4, PIK3R5, ATP1A1
NABA_BASEMENT_MEMBRANES	26	-0.938663	1.19176	0.69225	1.705e-08	2.43313e-07	LAMC1, COL6A3, LAMB1, HSPG2, NID1, LAMA4, LAMC2, COL15A1, LAMA3, NID2, LAMA2, COLQ, COL18A1, COL6A2, LAMB3, LAMA5, COL4A2, COL4A1, COL6A1, AGRN, COL4A5, COL4A6, COL4A4, LAMB4, LAMB2, LAMC3
PID_AURORA_A_PATHWAY	30	0.711088	0.549322	0.866277	1.72535e-08	2.43313e-07	OAZ1, RAN, TACC1, NFKBIA, TP53, CDC25B, BIRC5, PPP2R5D, ARHGEF7, RASA1, PRKACA, GADD45A, DLGAP5, AURKA, BRCA1, CENPA, AKT1, NDEL1, FZR1, AURKB, PAK1, GSK3B, TPX2, CKAP5, TDRD7, MDM2, GIT1, TACC3, AURKAIP1, CPEB1
REACTOME_TETRAHYDROBIOPTERIN_BH4_SYNTHESIS_RECYCLING_SALVAGE_AND_REGULATION	10	0.605701	0.453248	0.755222	1.72856e-08	2.43313e-07	CALM2, DHFR, SPR, GCH1, GCHFR, AKT1, PRKG2, PTS, HSP90AA1, CALM1
ST_G_ALPHA_I_PATHWAY	32	0.59638	0.500744	0.688134	1.87284e-08	2.60788e-07	TERF2IP, ITPR3, RAF1, SHC1, EGFR, CFB, ITPR2, PI3, ITPR1, ITPKB, PLCB4, PLCB2, DAG1, ITPKA, BRAF, AKT1, PITX2, MAPK1, KCNJ5, STAT3, EPHB2, RGS20, ASAH1, SOS2, PLCB1, AKT3, PIK3CB, SOS1, SRC, PLCB3, GRB2, DRD2
PID_CONE_PATHWAY	6	1.59402	1.39781	1.78229	1.92812e-08	2.65629e-07	GNB5, RGS9, GUCY2D, RDH5, GUCA1B, LRAT
REACTOME_REGULATION_OF_INSULIN_SECRETION_BY_GLUCAGON_LIKE_PEPTIDE1	28	-0.363081	0.447918	0.281687	1.9548e-08	2.6647e-07	PRKAR1A, GNB1, GNAS, IQGAP1, RAP1B, GNB2, ITPR3, GNG10, RAP1A, ITPR2, PRKACB, PRKACA, PRKAR2B, GNB5, GNG11, PRKAR2A, RAPGEF4, KCNS3, ADCY8, GNG7, GNG5, PRKACG, GLP1R, ADCY6, RAPGEF3, KCNB1, GNG12, PRKAR1B
REACTOME_SIGNALING_BY_GPCR	323	0.285108	0.200793	0.371168	2.2712e-08	3.06375e-07	CCL5, RHOA, APP, PRKAR1A, CALM2, PPP2R1A, GNB1, GNAS, PPP1CA, GNB2, RHOC, ANXA1, GNAI2, GNAI3, ITPR3, RAF1, ARHGEF12, PPP2CB, PIK3R2, NET1, GNG10, CD55, EGFR, RGS2, MAP2K2, PPP3CA, PPP3CB, PPP2R5D, PRKCD, GNAQ, NRAS, ITPR2, MAP2K1, PRKACB, PIK3R3, ROCK2, PRKACA, AGT, PPP2R1B, ADM, ARHGEF11, RGS1, ARHGEF1, GABBR1, RHOG, CDK1, ARHGEF9, RPS6KA1, DGKA, CXCL12, PRKAR2B, CX3CL1, FZD7, PDE4B, ADCY7, ARH…
KEGG_PROSTATE_CANCER	78	0.427803	0.308186	0.542556	2.47452e-08	3.30361e-07	BAD, HSP90AB1, HSP90B1, GSTP1, RAF1, PIK3R2, NFKBIA, CTNNB1, TP53, RELA, ARAF, EGFR, CREBBP, EP300, PDGFRB, CDKN1A, MAP2K2, NRAS, MAP2K1, FOXO1, PIK3R3, PDGFRA, RB1, IGF1R, FGFR2, BCL2, E2F3, PIK3CD, CASP9, KRAS, PTEN, PDGFB, CDK2, CREB1, PIK3CA, PDPK1, TGFA, CCNE2, TCF7, PDGFA, CREB5, BRAF, EGF, PIK3CG, SRD5A2, AKT1, FGFR1, MAPK1, CCND1, CDKN1B, NFKB1, IKBKB, CREB3, IGF1, CHUK, IKBKG, GSK3B, HSP…
REACTOME_PRESYNAPTIC_NICOTINIC_ACETYLCHOLINE_RECEPTORS	7	-0.592474	0.711873	0.470586	2.60433e-08	3.42386e-07	CHRNA1, CHRNB2, CHRNA4, CHRNE, CHRNA2, CHRNA3, CHRNG
REACTOME_G2_M_DNA_DAMAGE_CHECKPOINT	8	0.854047	0.602713	1.10157	2.61747e-08	3.42386e-07	CDK1, CDC25C, CHEK1, ATM, ATR, CHEK2, WEE1, CCNB1
ST_JNK_MAPK_PATHWAY	38	0.378694	0.287618	0.466069	2.67936e-08	3.46977e-07	JUN, SHC1, TP53, PAPPA, IL1R1, MAPK9, MAP2K4, MAP3K3, MAP3K11, GADD45A, MAP3K5, TAB1, DUSP4, MAP3K4, MAP2K5, MAPK10, ATF2, MAP3K12, TRAF6, NR2C2, MAP3K13, MAP3K10, DUSP8, MAP3K7, GAB1, AKT1, MAPK7, NFATC3, CDC42, DLD, MAP2K7, TAB2, MAP3K9, MAP3K1, DUSP10, ZAK, MAP3K2, MYEF2
PID_INTEGRIN1_PATHWAY	56	-0.692695	0.855683	0.536333	2.78012e-08	3.56461e-07	CD81, LAMC1, TGM2, THBS1, ITGA5, COL6A3, ITGA3, LAMB1, TGFBI, TNC, ITGA6, CD14, COL3A1, NID1, LAMA4, LAMC2, COL1A1, ITGAV, COL1A2, FBN1, THBS2, F13A1, COL5A1, LAMA3, VCAM1, COL7A1, COL11A1, CSPG4, ITGA2, LAMA2, PLAU, ITGA4, ITGA10, MDK, COL18A1, COL6A2, LAMB3, ITGA7, SPP1, LAMA5, FN1, VEGFA, PLAUR, ITGB1, COL4A1, COL6A1, COL4A5, COL4A6, ITGA8, COL4A4, ITGA1, LAMB2, COL11A2, JAM2, FGG, COL5A2
REACTOME_CYCLIN_E_ASSOCIATED_EVENTS_DURING_G1_S_TRANSITION_	60	0.350102	0.236947	0.458655	2.89877e-08	3.68031e-07	PSMB2, SKP1, PSMB7, PSME1, PSMD8, PSMD2, PSMB1, PSMD4, PSMF1, PSMC2, PSMA7, PSMD1, PSMD13, PSMC4, PSMC3, PSMA5, PSMA2, PSMD3, PSMB3, PSMA3, PSMA1, PSMC6, PSMD7, PSME2, CKS1B, PSMB4, CDKN1A, PSMD12, MYC, PSMB10, PSMA6, PSMD6, RB1, PSMA4, CCNA2, PSMD5, MNAT1, SKP2, CCNH, PSMC1, CDK2, PKMYT1, PSMB9, CDC25A, CCNE2, CCNA1, CUL1, PSMD9, MAX, PSMD11, PSMB5, PSMB6, PSMB8, CDKN1B, PSMC5, CDK7, PSMD14, WEE…
PID_DNA_PK_PATHWAY	14	0.372581	0.260093	0.482902	2.97955e-08	3.74613e-07	XRCC6, CSNK2B, CSNK2A2, XRCC4, CSNK2A1, LIG4, XRCC5, PRKDC, APTX, PNKP, NHEJ1, DCLRE1C, POLL, POLM
REACTOME_DEPOSITION_OF_NEW_CENPA_CONTAINING_NUCLEOSOMES_AT_THE_CENTROMERE	33	0.919588	0.694205	1.14969	3.03633e-08	3.78081e-07	H2AFZ, RBBP7, RUVBL1, SMARCA5, HIST2H2BE, CENPA, ITGB3BP, H2AFX, HIST4H4, MIS18BP1, HIST1H4H, HIST1H2BI, HIST1H2BE, HIST1H2BH, HIST1H2AJ, HIST1H2BK, HIST1H2BD, RBBP4, HIST1H2BG, OIP5, HIST2H2AA3, HIST1H4J, HIST1H2AE, HIST1H4I, CENPI, HIST1H2AC, RSF1, HJURP, MIS18A, CENPQ, CENPO, CENPN, NPM1
PID_MYC_ACTIV_PATHWAY	71	0.324207	0.239211	0.410986	3.10065e-08	3.82413e-07	RPL11, TAF10, NCL, LDHA, PTMA, ODC1, HSPD1, CCND2, EIF2S1, ENO1, SLC2A1, NME2, EIF4E, RUVBL2, ID2, NME1, RUVBL1, PRDX3, TP53, SUPT7L, BIRC5, CREBBP, TAF9, KAT2A, EP300, CDK4, MTA1, BMI1, TK1, MYC, SMAD4, TRRAP, ACTL6A, UBTF, CAD, NBN, E2F3, MMP9, PMAIP1, FOSL1, CDC25A, SERPINI1, SMAD3, DDX18, HMGA1, RCC1, SUPT3H, KAT5, TFRC, HUWE1, POLR3D, MAX, BAX, EIF4G1, HSPA4, PIM1, TAF12, SHMT1, HSP90AA1, PD…
KEGG_SELENOAMINO_ACID_METABOLISM	20	0.430596	0.30778	0.548421	3.32844e-08	4.06635e-07	MAT2A, AHCYL1, AHCY, SEPHS2, MARS, PAPSS2, LCMT2, GGT5, MAT1A, WBSCR22, SEPHS1, PAPSS1, AHCYL2, CTH, MAT2B, HEMK1, TRMT11, METTL2B, LCMT1, SCLY
REACTOME_PECAM1_INTERACTIONS	10	-0.612716	0.778043	0.45057	3.50759e-08	4.24517e-07	ITGAV, LYN, PLCG1, YES1, ITGB3, LCK, PTPN6, PECAM1, FYN, SRC
REACTOME_RNA_POL_III_TRANSCRIPTION	30	0.434109	0.329282	0.536167	3.56415e-08	4.27367e-07	SSB, POLR2L, POLR2K, TBP, BRF1, SNAPC3, SNAPC2, GTF3C2, POLR3F, SNAPC1, SNAPC4, POU2F1, POLR1C, POLR3D, NFIB, POLR2H, POLR3C, POLR2F, SNAPC5, POLR2E, GTF3C5, POLR3E, POLR1D, GTF3C3, POLR3K, BRF2, LZTS1, GTF3C4, POLR3B, ZNF143
REACTOME_GPCR_DOWNSTREAM_SIGNALING	250	0.34477	0.241716	0.443671	3.6243e-08	4.30593e-07	CCL5, RHOA, APP, GNB1, GNAS, GNB2, RHOC, ANXA1, GNAI2, GNAI3, ITPR3, ARHGEF12, PIK3R2, NET1, GNG10, RGS2, PRKCD, GNAQ, ITPR2, PIK3R3, ROCK2, AGT, ADM, ARHGEF11, RGS1, ARHGEF1, GABBR1, RHOG, ARHGEF9, DGKA, CXCL12, PDE4B, ADCY7, ARHGEF17, PLCB4, CXCL9, F2R, GNB5, LPAR1, PLCB2, GNG11, PDE2A, GNA11, EDNRB, RGS19, RGS4, PIK3CA, GRK5, ARHGAP4, EDNRA, CXCL1, PDE4D, ADCY9, PDPK1, CXCL10, CCL21, CGA, S1PR…
PID_THROMBIN_PAR4_PATHWAY	11	-0.573488	0.692184	0.455694	3.91332e-08	4.57658e-07	RHOA, GNB1, GNAQ, ROCK2, PLCB2, GNA11, GNA15, GNA13, MYL2, ROCK1, GNA14
BIOCARTA_G2_PATHWAY	23	0.513473	0.347426	0.681759	3.92279e-08	4.57658e-07	YWHAQ, YWHAH, TP53, CDC25B, EP300, PLK1, CDKN1A, CDK1, RPS6KA1, GADD45A, BRCA1, CDC25A, CDC25C, CHEK1, ATM, PRKDC, ATR, CDKN2D, CHEK2, WEE1, CDC34, CCNB1, MDM2
REACTOME_SIGNALING_BY_BMP	19	0.621421	0.448862	0.795668	4.01539e-08	4.64279e-07	UBE2D3, SMAD4, ZFYVE16, SKI, SMAD7, BMPR1A, SMAD5, BMP2, ACVR2A, SMURF2, SMAD6, SMAD1, FSTL1, CHRDL1, BMPR2, UBE2D1, SMURF1, ACVR2B, GREM2
REACTOME_SIGNALING_BY_THE_B_CELL_RECEPTOR_BCR	107	0.237955	0.155794	0.321839	4.27085e-08	4.87801e-07	BAD, PSMB2, CALM2, SKP1, PSMB7, PSME1, PSMD8, PSMD2, PSMB1, PSMD4, PSMF1, PSMC2, PSMA7, ITPR3, PSMD1, PSMD13, PSMC4, PSMC3, PSMA5, PSMA2, PSMD3, PSMB3, SHC1, NFKBIA, PSMA3, PSMA1, PSMC6, PSMD7, PSME2, RELA, GSK3A, PSMB4, CDKN1A, NR4A1, PSMD12, LYN, NRAS, PSMB10, ITPR2, PSMA6, FOXO1, PSMD6, STIM1, PLCG1, PSMA4, PSMD5, RPS6KB2, PIK3CD, NFKBIE, CASP9, KRAS, PTEN, FOXO3, PSMC1, PSMB9, CREB1, PDPK1, P…
PID_BARD1_PATHWAY	28	0.563939	0.429548	0.692866	4.29415e-08	4.87801e-07	UBE2D3, UBE2L3, XRCC6, PCNA, TP53, CSTF1, TOPBP1, NBN, RBBP8, FANCG, FANCA, CDK2, BRCA1, RAD51, FANCC, BARD1, MRE11A, RAD50, ATM, XRCC5, PRKDC, EWSR1, ATR, CCNE1, FANCL, FANCF, FANCE, NPM1
REACTOME_MYOGENESIS	19	0.717448	0.610606	0.826527	4.64141e-08	5.22664e-07	CTNNA1, CTNNB1, ABL1, MAPK14, TCF3, MEF2D, CDH2, TCF4, NEO1, MAP2K6, MYF6, CDON, MEF2C, MEF2A, CDC42, TCF12, BNIP2, MAPK11, CDH4
BIOCARTA_ATM_PATHWAY	18	0.628734	0.492304	0.75962	4.7448e-08	5.297e-07	JUN, NFKBIA, TP53, RELA, ABL1, CDKN1A, NBN, RBBP8, GADD45A, BRCA1, RAD51, CHEK1, MRE11A, RAD50, ATM, NFKB1, CHEK2, MDM2
REACTOME_NEUROTRANSMITTER_RECEPTOR_BINDING_AND_DOWNSTREAM_TRANSMISSION_IN_THE_POSTSYNAPTIC_CELL	78	0.407042	0.303774	0.506116	5.18869e-08	5.74303e-07	AP2B1, AP2M1, CALM2, GNB1, GNB2, GNAI2, GNAI3, RAF1, GNG10, AP2S1, NSF, DLG1, PRKACB, GABBR1, MYO6, ARHGEF9, RPS6KA1, ADCY7, RPS6KA3, ACTN2, GNB5, PLCB2, GNG11, CREB1, ADCY9, PDPK1, PICK1, RPS6KA2, GRIA2, BRAF, GNAL, CHRNA1, CHRNB2, CHRNA4, KCNJ2, ADCY8, GNG7, GNG5, CHRNE, DLG3, CHRNA2, PRKCB, GABRR2, MAPK1, KCNJ5, GABRA4, ADCY6, ADCY3, GNAI1, GRIA1, CAMK2B, GABBR2, KCNJ15, CHRNA3, GRIN1, AKAP9, …
BIOCARTA_MET_PATHWAY	35	-0.463415	0.607293	0.316522	5.37146e-08	5.89495e-07	RAP1B, PXN, RAF1, JUN, CRK, RAP1A, MAP2K2, MAP2K1, RASA1, PTK2B, DOCK1, MET, ELK1, ACTA1, PTEN, PIK3CA, PTPN11, CRKL, MAP4K1, PIK3CG, GAB1, PTK2, MAPK1, STAT3, FOS, PAK1, HGF, ITGB1, MAPK3, PIK3R1, SOS1, HRAS, SRC, ITGA1, GRB2
REACTOME_ASSOCIATION_OF_LICENSING_FACTORS_WITH_THE_PRE_REPLICATIVE_COMPLEX	9	0.513954	0.402589	0.626815	6.05067e-08	6.58455e-07	ORC4, E2F3, CDC6, ORC2, ORC5, ORC1, CDT1, ORC3, GMNN
BIOCARTA_EIF2_PATHWAY	10	1.1299	0.891332	1.36548	6.31697e-08	6.81706e-07	PPP1CA, EIF2S1, EIF2AK2, EIF2S3, EIF5, EIF2S2, GSK3B, EIF2B5, EIF2AK1, EIF2AK3
ST_GA13_PATHWAY	33	0.539181	0.370672	0.711221	6.37225e-08	6.81989e-07	PLD1, PLD3, NFKBIA, CFB, SRF, ROCK2, ARHGEF11, MAP2K4, BCL2, PI3, MAP3K5, NFKBIE, PDPK1, DLG4, RDX, PRKD1, GNA13, TONSL, AKT1, NFKB2, TBXA2R, PTK2, CDC42, NFKB1, PHKA2, PLD2, IKBKG, NFKBIL1, AKT3, PIK3CB, ROCK1, NFKBIB, MAP3K1
REACTOME_REGULATION_OF_AMPK_ACTIVITY_VIA_LKB1	10	0.503288	0.377893	0.625379	6.43646e-08	6.83215e-07	PRKAG1, PRKAB1, PPM1A, STK11, PRKAA1, PRKAB2, PRKAG2, CAB39, CAB39L, STRADA
REACTOME_PURINE_RIBONUCLEOSIDE_MONOPHOSPHATE_BIOSYNTHESIS	10	0.770599	0.55185	0.983579	7.00736e-08	7.37766e-07	PAICS, IMPDH2, ADSL, IMPDH1, ATIC, PPAT, GART, PFAS, GMPS, ADSS
PID_AR_PATHWAY	51	0.324119	0.210773	0.435135	7.83407e-08	8.13378e-07	GSN, XRCC6, FKBP4, CTNNB1, CCND3, SRF, SVIL, RANBP9, NRIP1, FHL2, PIAS3, PTK2B, TGIF1, CTDSP2, MED1, ZNF318, TCF4, RPS6KA3, PAWR, BRCA1, HIP1, NCOA2, CDKN2A, AKT1, CDK11B, CASP8, XRCC5, PA2G4, PRKDC, CCND1, UBE2I, NCOA6, UBA3, PATZ1, TGFB1I1, KDM4C, AR, UBE3A, ZMIZ1, KDM1A, CARM1, KDM3A, PIAS4, TMF1, HNRNPA1, PELP1, CTDSP1, PIAS1, APPL1, VAV3, MAK
BIOCARTA_ARF_PATHWAY	15	0.480307	0.334586	0.627452	7.85114e-08	8.13378e-07	TP53, ABL1, MYC, RB1, PIK3CA, PIK3CG, CDKN2A, POLR1C, RAC1, PIK3R1, TWIST1, MDM2, POLR1D, POLR1B, TBX2
KEGG_PANCREATIC_CANCER	63	0.278061	0.191659	0.366274	8.49866e-08	8.73474e-07	PLD1, BAD, STAT1, RAF1, PIK3R2, JAK1, TP53, RELA, ARAF, EGFR, RALB, CDK4, SMAD4, MAP2K1, PIK3R3, RALBP1, SMAD2, RB1, MAPK9, VEGFB, E2F3, PIK3CD, CASP9, KRAS, PIK3CA, MAPK10, TGFA, RAD51, SMAD3, BRAF, EGF, PIK3CG, BCL2L1, FIGF, TGFBR1, CDKN2A, AKT1, TGFBR2, RAC2, MAPK1, BRCA2, RAC1, CCND1, CDC42, STAT3, RALGDS, NFKB1, IKBKB, ARHGEF6, PGF, CHUK, TGFB3, TGFB2, IKBKG, VEGFC, VEGFA, ERBB2, MAPK3, PIK3…
KEGG_HISTIDINE_METABOLISM	22	0.524358	0.370609	0.671868	8.81721e-08	8.99078e-07	ALDH2, ALDH9A1, ALDH3A2, ALDH1A3, LCMT2, MAOB, HNMT, MAOA, ALDH3B2, DDC, ALDH3A1, ALDH3B1, ASPA, HAL, HDC, WBSCR22, ALDH7A1, ALDH1B1, HEMK1, TRMT11, METTL2B, LCMT1
REACTOME_CELL_DEATH_SIGNALLING_VIA_NRAGE_NRIF_AND_NADE	43	0.407586	0.292969	0.524604	9.26424e-08	9.37281e-07	BAD, ARHGEF12, SQSTM1, NET1, CASP3, ARHGEF11, ARHGEF9, PSEN1, ARHGEF17, PSEN2, ARHGAP4, FGD1, ARHGEF4, ITGB3BP, TRAF6, NGFR, VAV1, TIAM1, ARHGEF2, ARHGEF16, TRIO, AKAP13, RAC1, NCSTN, MAGED1, AATF, ITSN1, ARHGEF6, YWHAE, SOS2, SOS1, ABR, ARHGEF18, FGD2, PSENEN, APH1A, ARHGEF3, VAV3, ECT2, TIAM2, OBSCN, APH1B, BCL2L11
BIOCARTA_G1_PATHWAY	25	0.448875	0.324798	0.575552	9.54516e-08	9.58216e-07	HDAC1, TP53, ABL1, CDK4, CDKN1A, SMAD4, DHFR, RB1, CDK1, SKP2, TFDP1, CDK2, CDC25A, SMAD3, CCNA1, CDKN2A, CDKN2B, ATM, CCND1, CDKN1B, TGFB3, ATR, TGFB2, GSK3B, CCNE1
REACTOME_DEADENYLATION_DEPENDENT_MRNA_DECAY	32	0.313925	0.21106	0.412608	9.65824e-08	9.6211e-07	EIF4A3, EIF4E, CNOT8, LSM3, EDC4, LSM4, LSM5, CNOT3, CNOT4, LSM1, PARN, DDX6, LSM6, EXOSC9, PAIP1, EIF4G1, LSM2, EXOSC2, EIF4B, EXOSC7, DCP2, DIS3, EXOSC8, PABPC1, CNOT2, CNOT6, CNOT7, EXOSC5, DCP1A, EXOSC4, DCPS, EDC3
BIOCARTA_P53HYPOXIA_PATHWAY	20	0.437669	0.316313	0.55582	9.99732e-08	9.88285e-07	HSPA1A, HIF1A, NQO1, RPA1, TP53, EP300, CDKN1A, FHL2, GADD45A, CSNK1A1, AKT1, CSNK1D, ATM, BAX, ABCB1, IGFBP3, HSP90AA1, NFKBIB, TAF1, MDM2
BIOCARTA_PTC1_PATHWAY	10	0.877205	0.640953	1.10722	1.04443e-07	1.02465e-06	CDC25B, CDK1, MNAT1, CCNH, CDC25A, CDC25C, XPO1, PTCH1, CDK7, CCNB1
REACTOME_MEIOTIC_RECOMBINATION	39	0.596956	0.434217	0.763105	1.20274e-07	1.17109e-06	H3F3B, H2AFZ, RPA1, RPA2, CDK4, MLH1, HIST2H2BE, NBN, RBBP8, CDK2, BRCA1, MLH3, TOP3A, RAD51, MRE11A, H2AFX, BLM, HIST4H4, RAD51C, HIST1H3B, HIST1H4H, BRCA2, RAD50, ATM, HIST1H2BI, HIST1H2BE, HIST1H2BH, HIST1H3C, HIST1H2AJ, RPA3, HIST1H2BK, HIST1H2BD, HIST1H2BG, H3F3A, HIST2H2AA3, HIST1H4J, HIST1H2AE, HIST1H4I, HIST1H2AC
REACTOME_SIGNALING_BY_NOTCH	74	0.237365	0.154587	0.316777	1.21986e-07	1.17889e-06	TMED2, SKP1, NCOR1, HIF1A, RAB6A, HDAC1, JUN, SNW1, TP53, HDAC2, TBL1X, B4GALT1, FURIN, CCNC, SEL1L, CREBBP, KAT2A, EP300, MAML1, MYC, NOTCH2, HDAC5, ADAM10, TLE1, NOTCH3, ARRB2, HES1, PSEN1, E2F3, KAT2B, TFDP1, MFNG, HDAC4, PSEN2, TLE2, CDK8, TLE4, MAMLD1, NOTCH4, ATP2A1, HDAC9, ADAM17, TLE3, HDAC6, ATP2A3, CUL1, NCOR2, RBPJ, CCND1, NCSTN, JAG1, ATP2A2, DLK1, JAG2, ST3GAL6, CNTN1, POFUT1, DTX4, …
PID_ERBB4_PATHWAY	34	0.527796	0.379328	0.670232	1.25639e-07	1.20521e-06	NCOR1, PIK3R2, SHC1, PIK3R3, STAT5A, HBEGF, PIK3CD, PIK3CA, DLG4, STAT5B, ADAM17, EREG, JAK2, NRG1, ERBB4, NRG2, BTC, CBFA2T3, MAPK1, ITCH, FYN, TAB2, PRLR, WWOX, ERBB2, LRIG1, MAPK3, PIK3R1, WWP1, PIK3CB, NEDD4, YAP1, GRB2, MDM2
BIOCARTA_AGPCR_PATHWAY	11	-0.578208	0.758987	0.394996	1.2698e-07	1.20912e-06	PRKAR1A, GNB1, GNAS, PRKACB, PRKAR2B, PRKAR2A, PRKACG, PRKCB, PRKAR1B, PRKCA, ARRB1
PID_P38_GAMMA_DELTA_PATHWAY	9	0.736481	0.538304	0.938804	1.34467e-07	1.27106e-06	STMN1, PKN1, SNTA1, MAPT, MAP2K6, MAP2K3, CCND1, MAPK13, ZAK
REACTOME_POTASSIUM_CHANNELS	39	0.358381	0.273124	0.445422	1.38329e-07	1.29309e-06	GNB1, GNB2, GNG10, GABBR1, KCNAB2, KCNN4, KCNQ1, KCNK1, KCNJ8, KCNA6, KCNN3, KCNS3, KCNN1, KCNA5, KCNJ2, GNG7, KCND2, GNG5, KCNA3, KCNS1, HCN2, KCNJ5, KCNC1, ABCC9, KCNMB1, GABBR2, KCNAB1, KCNJ15, KCNK2, KCNF1, KCNB1, GNG12, KCND3, KCNMB4, KCNJ16, KCNK7, KCNK10, KCNH6, KCNMB3
REACTOME_CLASS_A1_RHODOPSIN_LIKE_RECEPTORS	135	0.496045	0.343522	0.651749	1.39074e-07	1.29309e-06	CCL5, APP, ANXA1, AGT, CXCL12, CX3CL1, CXCL9, F2R, LPAR1, CCL4, EDNRB, EDNRA, CXCL1, CXCL10, CCL21, CGA, S1PR1, PTGER4, ADORA2A, CCR1, CCL3L1, FPR1, NMB, HCAR3, CXCL13, AGTR1, NPY1R, MC1R, CCL20, ADORA1, C5, HRH1, BDKRB2, ADORA2B, CX3CR1, PNOC, NMU, CXCR5, ADRB2, ADORA3, PTGIR, GPR4, P2RY2, PTAFR, NTS, GRP, CXCL6, CCR7, XCL1, NPFF, F2RL1, S1PR4, RHO, TAC1, CNR2, PTGER2, P2RY14, HTR2B, LPAR2, EDN2…
BIOCARTA_PS1_PATHWAY	12	0.278811	0.184197	0.371989	1.39794e-07	1.29309e-06	CTNNB1, DVL1, PSEN1, APC, FZD1, BTRC, ADAM17, RBPJ, GSK3B, HNF1A, AXIN1, NOTCH1
REACTOME_SYNTHESIS_OF_PIPS_AT_THE_EARLY_ENDOSOME_MEMBRANE	11	0.397683	0.276288	0.517467	1.43109e-07	1.31437e-06	MTMR2, FIG4, MTM1, PIK3C3, INPP4B, PI4K2A, MTMR4, PIK3R4, PIK3C2A, PIKFYVE, VAC14
REACTOME_GPCR_LIGAND_BINDING	180	0.346816	0.23088	0.45807	1.44345e-07	1.31639e-06	CCL5, APP, GNB1, GNAS, GNB2, ANXA1, GNG10, CD55, AGT, ADM, GABBR1, CXCL12, CX3CL1, FZD7, CXCL9, FZD6, F2R, GNB5, LPAR1, CCL4, GNG11, EDNRB, FZD1, EDNRA, CXCL1, CXCL10, CCL21, CGA, S1PR1, PTGER4, RAMP1, ADORA2A, VIPR1, CCR1, CCL3L1, FPR1, NMB, HCAR3, CXCL13, RAMP3, AGTR1, NPY1R, MC1R, CCL20, ADORA1, C5, HRH1, WNT2, RAMP2, BDKRB2, ADORA2B, CX3CR1, PNOC, PTH1R, WNT5A, NMU, CXCR5, ADRB2, ADORA3, PTGI…
REACTOME_SMAD2_SMAD3_SMAD4_HETEROTRIMER_REGULATES_TRANSCRIPTION	23	0.562435	0.37463	0.754175	1.4824e-07	1.34246e-06	HDAC1, JUNB, CCNC, WWTR1, E2F4, MYC, SMAD4, SERPINE1, MEN1, SMAD2, CDK9, TGIF1, TFDP1, CCNT2, SMAD7, CDK8, RBL1, SMAD3, CCNT1, CDKN2B, SP1, TGIF2, E2F5
PID_P38_MK2_PATHWAY	19	0.504285	0.337427	0.669528	1.61964e-07	1.45655e-06	YWHAZ, YWHAQ, YWHAH, RAF1, MAPKAPK2, HSPB1, CDC25B, SRF, MAPK14, TCF3, MAPKAPK3, LSP1, CREB1, YWHAB, SFN, YWHAE, MAPK11, TSC2, ETV1
REACTOME_APOPTOSIS_INDUCED_DNA_FRAGMENTATION	10	0.644087	0.444807	0.835283	1.63974e-07	1.46446e-06	HMGB1, KPNA1, CASP3, DFFA, DFFB, HMGB2, H1F0, KPNB1, HIST1H1C, HIST1H1D
REACTOME_MEIOSIS	63	0.314368	0.215261	0.415554	1.69807e-07	1.50616e-06	H3F3B, RAD21, H2AFZ, TERF2IP, RPA1, SMC1A, RPA2, CDK4, STAG1, MLH1, HIST2H2BE, SYNE2, NBN, LMNB1, RBBP8, LMNA, TERF1, TERF2, CDK2, POT1, BRCA1, ACD, MLH3, TOP3A, RAD51, MRE11A, H2AFX, BLM, HIST4H4, RAD51C, HIST1H3B, SYCP2, SYCP1, STAG2, HIST1H4H, BRCA2, RAD50, ATM, HIST1H2BI, HIST1H2BE, HIST1H2BH, HIST1H3C, HIST1H2AJ, UBE2I, SMC3, SYNE1, RPA3, HIST1H2BK, ATR, HIST1H2BD, HIST1H2BG, HSPA2, SUN2, DI…
REACTOME_MEMBRANE_TRAFFICKING	94	-0.299298	0.406002	0.195416	1.7986e-07	1.57756e-06	ARF1, AP2M1, CLTC, FTH1, M6PR, SEC31A, CLTA, COPB2, RAB5C, PUM1, ARCN1, COPE, DAB2, COPB1, IGF2R, GBF1, VAMP2, GJA1, TPD52, TSG101, CPD, TJP1, SNX2, CHMP2A, DNM2, GAK, SEC24C, SEC24D, AP3S1, CHMP2B, VAMP8, BLOC1S1, SEC24B, VAMP7, PICALM, AP3B1, MYO6, AP1S2, AP1G1, GJA9, OCRL, STX4, STAM, GNS, TPD52L1, TGOLN2, SEC23A, DNAJC6, GJA4, GJB1, CLTB, AP1S1, AP1B1, GJB3, SH3GL2, CLTCL1, GJB5, NAPA, TFRC, …
KEGG_AMYOTROPHIC_LATERAL_SCLEROSIS_ALS	45	0.174959	0.114916	0.23626	1.80828e-07	1.57756e-06	BAD, SOD1, GPX1, CAT, TP53, DAXX, TOMM40, PPP3CA, PPP3CB, MAPK14, CASP3, TNFRSF1B, CCS, BCL2, MAP3K5, CASP9, NEFH, BID, PPP3R1, APAF1, NEFM, GRIA2, MAP2K6, CASP1, RAB5A, CHP2, PRPH2, BCL2L1, PPP3CC, TNF, NOS1, TNFRSF1A, MAP2K3, SLC1A2, BAX, RAC1, CYCS, GRIA1, MAPK13, GRIN1, MAPK11, PRPH, GRIN2C, DERL1, NEFL
REACTOME_LATE_PHASE_OF_HIV_LIFE_CYCLE	88	0.246104	0.158889	0.329772	1.81511e-07	1.57756e-06	TAF10, TCEB2, RAN, SSRP1, NMT1, SUPT5H, SUPT4H1, NCBP2, RAE1, RANBP2, TPR, TSG101, POLR2B, NUP153, NUP62, NUP214, TAF9, ERCC3, NUP133, NUP93, POLR2G, GTF2F1, GTF2H1, RANBP1, POLR2L, POLR2K, GTF2A2, GTF2E2, RNMT, POLR2A, TCEB3, TCEB1, NUP88, TBP, CDK9, MNAT1, TAF6, GTF2H4, POLR2D, NUPL2, CCNH, RNGTT, CCNT2, NMT2, CTDP1, POM121, GTF2E1, TAF13, RCC1, GTF2A1, NUP155, CCNT1, GTF2B, XPO1, POLR2C, POLR2…
REACTOME_RAF_MAP_KINASE_CASCADE	10	-0.667646	0.886749	0.451296	1.85148e-07	1.59845e-06	RAF1, MAP2K2, NRAS, MAP2K1, CDK1, KRAS, MAPK1, YWHAB, MAPK3, HRAS
REACTOME_NUCLEOTIDE_LIKE_PURINERGIC_RECEPTORS	13	0.618409	0.49076	0.748726	1.92568e-07	1.65149e-06	ADORA2A, ADORA1, ADORA2B, ADORA3, P2RY2, P2RY14, LPAR4, P2RY1, P2RY6, P2RY11, P2RY10, LPAR6, P2RY13
REACTOME_P75_NTR_RECEPTOR_MEDIATED_SIGNALLING	62	0.271461	0.180442	0.358782	2.45867e-07	2.09472e-06	BAD, RHOA, ARHGDIA, HDAC1, ARHGEF12, SQSTM1, NFKBIA, IRAK1, RELA, NET1, HDAC2, CASP3, ARHGEF11, ARHGEF1, ARHGEF9, PSEN1, ARHGEF17, PSEN2, ARHGAP4, FGD1, ARHGEF4, ITGB3BP, TRAF6, SMPD2, ADAM17, NGFR, VAV1, TIAM1, OMG, ARHGEF2, ARHGEF16, TRIO, AKAP13, RAC1, NCSTN, MAGED1, MYD88, AATF, ITSN1, IKBKB, ARHGEF6, RIPK2, PRKCI, YWHAE, RTN4, SOS2, SOS1, ABR, ARHGEF18, FGD2, HDAC3, MAG, PSENEN, PRDM4, APH1A…
REACTOME_PI3K_CASCADE	48	0.407024	0.325451	0.485284	2.56215e-07	2.16861e-06	RPS6, PIK3R2, EIF4E, RHEB, PRKAG1, PRKAB1, FGFR2, PPM1A, RPS6KB1, STK11, PIK3C3, PIK3CA, FGFR3, FGF2, PDPK1, FGFR4, IRS1, FGF1, FGF7, KL, FGF18, GAB1, FGFR1, INSR, FGF6, PDE3B, EIF4G1, IRS2, TSC1, PRKAA1, FGF5, DOK1, EIF4B, PIK3R1, PIK3CB, PIK3R4, PRKAB2, GRB2, PRKAG2, TSC2, CAB39, TRIB3, MLST8, CAB39L, FRS2, FGF22, EIF4EBP1, STRADA
PID_S1P_META_PATHWAY	19	0.38209	0.261078	0.505635	2.59497e-07	2.17632e-06	GNAI2, GNAI3, GNAQ, ABCC1, GNA11, S1PR1, GNAO1, GNAZ, GNA15, S1PR4, GNA13, SGPL1, GNAI1, SPHK1, GNA14, SGPP1, S1PR5, GNA12, SPHK2
KEGG_NEUROACTIVE_LIGAND_RECEPTOR_INTERACTION	110	0.371981	0.266456	0.473239	2.60486e-07	2.17632e-06	THRA, NR3C1, TSPO, GABBR1, F2R, LPAR1, P2RX4, EDNRB, EDNRA, CGA, S1PR1, PTGER4, ADORA2A, VIPR1, GABRP, FPR1, GLRB, AGTR1, GRIA2, PRSS2, NPY1R, MC1R, ADORA1, GZMA, GHR, HRH1, CTSG, BDKRB2, ADORA2B, PTH1R, ADRA2C, ADRB2, ADORA3, PTGIR, P2RY2, PTAFR, CALCRL, F2RL1, S1PR4, CNR2, PTGER2, CHRNA1, CHRNB2, P2RY14, HTR2B, LPAR2, CHRNA4, HTR6, LPAR4, P2RX7, LEP, HTR2A, PTGFR, LEPR, CHRNE, NPY5R, P2RY1, PRS…
REACTOME_RNA_POL_III_TRANSCRIPTION_INITIATION_FROM_TYPE_2_PROMOTER	20	0.476669	0.349005	0.600965	2.67166e-07	2.21782e-06	POLR2L, POLR2K, TBP, BRF1, GTF3C2, POLR3F, POLR1C, POLR3D, POLR2H, POLR3C, POLR2F, POLR2E, GTF3C5, POLR3E, POLR1D, GTF3C3, POLR3K, LZTS1, GTF3C4, POLR3B
REACTOME_INWARDLY_RECTIFYING_K_CHANNELS	14	0.633715	0.497506	0.764399	2.99834e-07	2.47316e-06	GNB1, GNB2, GNG10, GABBR1, KCNJ8, KCNJ2, GNG7, GNG5, KCNJ5, ABCC9, GABBR2, KCNJ15, GNG12, KCNJ16
REACTOME_RNA_POL_II_TRANSCRIPTION	88	0.240417	0.152072	0.325168	3.09065e-07	2.52073e-06	SRSF9, TAF10, RNPS1, TCEB2, SRSF11, SRSF2, SSRP1, SRSF7, SRRM1, SUPT5H, SUPT4H1, NCBP2, PABPN1, SRSF4, SRSF1, POLR2B, TAF9, ERCC3, CSTF1, POLR2G, GTF2F1, GTF2H1, SNRPD3, NFX1, POLR2L, POLR2K, GTF2A2, GTF2E2, RNMT, NUDT21, POLR2A, TCEB3, TCEB1, U2AF1, SRSF3, TBP, CDK9, SNRPE, CDC40, PCF11, SRSF5, MNAT1, TAF6, GTF2H4, POLR2D, SNRPF, CSTF3, CCNH, RNGTT, CLP1, CSTF2, CCNT2, CTDP1, SNRPG, GTF2E1, TAF1…
PID_BMP_PATHWAY	34	0.416243	0.266301	0.563294	3.09496e-07	2.52073e-06	PPP1CA, CTDSPL, PPP1R15A, NUP214, SMAD4, BAMBI, CTDSP2, ZFYVE16, TAB1, PPM1A, SKI, SMAD7, BMPR1A, FST, SMAD5, BMP2, SMURF2, BMP6, MAP3K7, SMAD6, SMAD1, MAPK1, BMP7, CHRDL1, BMPR2, GSK3B, TAB2, AHSG, CHRD, BMP4, SMURF1, SOSTDC1, CTDSP1, GREM1
REACTOME_PKB_MEDIATED_EVENTS	21	0.41077	0.289321	0.534762	3.14171e-07	2.54282e-06	RPS6, EIF4E, RHEB, PRKAG1, PRKAB1, PPM1A, RPS6KB1, STK11, PDE3B, EIF4G1, TSC1, PRKAA1, EIF4B, PRKAB2, PRKAG2, TSC2, CAB39, MLST8, CAB39L, EIF4EBP1, STRADA
NABA_ECM_AFFILIATED	83	0.42879	0.277471	0.58328	3.36809e-07	2.70911e-06	ANXA5, ANXA6, ANXA1, ANXA2, LGALS1, SDC1, ANXA4, ANXA7, SDC4, GPC1, SDC3, C1QB, ANXA8, LGALS9, LMAN1, SEMA4D, PLXNA3, SEMA3C, PARM1, CSPG4, GPC4, CLEC11A, CLEC3B, FCN1, SEMA5A, OVGP1, PLXNB3, ANXA11, LGALS7, PLXNC1, CLEC10A, SEMA3A, SEMA3F, SEMA3E, CD209, PLXNA2, MUC1, SEMA6C, LGALS2, PLXNB2, LGALS8, LGALS3, GPC3, ANXA3, CLEC2B, REG1A, ANXA9, SEMA4F, SDC2, PLXND1, PLXDC1, MUC6, SFTPD, SFTPB, PLXD…
PID_WNT_CANONICAL_PATHWAY	18	0.334134	0.244308	0.420316	3.43027e-07	2.7421e-06	CUL3, CTNNB1, DVL3, PPP2R5A, GSK3A, RANBP3, CAV1, DVL1, APC, LRP6, PIP5K1B, PI4K2A, GSK3B, AXIN1, DVL2, KLHL12, CSNK1G1, FZD5
REACTOME_PRE_NOTCH_PROCESSING_IN_GOLGI	14	0.462718	0.308641	0.614462	3.46499e-07	2.75286e-06	TMED2, RAB6A, B4GALT1, FURIN, SEL1L, NOTCH2, NOTCH3, MFNG, NOTCH4, ATP2A1, ATP2A3, ATP2A2, ST3GAL6, RFNG
REACTOME_RAP1_SIGNALLING	15	-0.371924	0.47524	0.267218	3.56857e-07	2.81786e-06	YWHAZ, RAP1B, RAF1, RAP1A, PRKACB, PRKACA, RAP1GAP, SIPA1, RASGRP1, RAPGEF4, PRKACG, RASGRP2, YWHAB, RAPGEF3, RAP1GAP2
KEGG_HOMOLOGOUS_RECOMBINATION	25	0.398793	0.282987	0.517026	3.83447e-07	3.00948e-06	POLD2, RPA1, RPA2, SHFM1, SSBP1, NBN, POLD4, POLD1, RAD54L, TOP3A, RAD51, MRE11A, RAD52, BLM, RAD51C, XRCC2, BRCA2, RAD50, RPA3, RAD51B, POLD3, TOP3B, MUS81, RAD54B, RAD51D
REACTOME_ACTIVATION_OF_THE_AP1_FAMILY_OF_TRANSCRIPTION_FACTORS	9	-1.11396	1.38501	0.83726	4.10835e-07	3.19876e-06	JUN, MAPK14, MAPK9, MAPK10, ATF2, MAPK1, FOS, MAPK11, MAPK3
REACTOME_CREB_PHOSPHORYLATION_THROUGH_THE_ACTIVATION_OF_RAS	18	0.504454	0.335285	0.666754	4.12504e-07	3.19876e-06	CALM2, RAF1, RPS6KA1, RPS6KA3, ACTN2, CREB1, PDPK1, RPS6KA2, BRAF, MAPK1, CAMK2B, GRIN1, AKAP9, RRAS, HRAS, CALM1, GRIN2C, NEFL
KEGG_AMINOACYL_TRNA_BIOSYNTHESIS	29	0.405059	0.259574	0.552505	4.23752e-07	3.26642e-06	NARS, KARS, WARS, SARS, EPRS, AARS, TARS, MARS, DARS, VARS, HARS, FARSA, CARS, LARS2, FARS2, IARS, GARS, HARS2, YARS, LARS, QARS, IARS2, CARS2, DARS2, YARS2, SARS2, WARS2, NARS2, TARS2
SIG_PIP3_SIGNALING_IN_CARDIAC_MYOCTES	58	0.398901	0.254313	0.53761	4.3249e-07	3.31405e-06	BAD, YWHAZ, YWHAQ, YWHAH, SHC1, INPPL1, GSK3A, IFI27, MYC, PTPN1, EBP, PAK4, RPS6KA1, MET, GADD45A, RPS6KA3, PIK3CD, PTEN, FOXO3, RPS6KB1, CDK2, CREB1, PIK3CA, PDPK1, IRS1, RPS6KA2, NOLC1, CREB5, CYTH3, BCL2L1, ERBB4, CDKN2A, GAB1, AKT1, IRS4, PTK2, CDC42, YWHAB, PAK2, CDKN1B, IRS2, SFN, TSC1, CREB3, IGF1, PAK1, GSK3B, PARD3, YWHAE, SOS2, AKT3, SOS1, PAK3, GRB2, TSC2, PPP1R13B, PAK6, PIK3R5
REACTOME_AMINE_COMPOUND_SLC_TRANSPORTERS	12	0.607235	0.410984	0.799712	4.49213e-07	3.40306e-06	SLC6A1, SLC14A1, SLC18A2, SLC6A6, SLC6A15, SLC6A9, SLC6A11, SLC6A2, RHAG, RHCG, SLC6A14, SLC44A1
ST_PAC1_RECEPTOR_PATHWAY	6	0.382971	0.283628	0.47829	4.51655e-07	3.40306e-06	GNAQ, ITPKB, DAG1, ITPKA, CAMP, ASAH1
REACTOME_COPI_MEDIATED_TRANSPORT	9	-0.444529	0.569144	0.319125	4.54075e-07	3.40306e-06	ARF1, COPB2, ARCN1, COPE, COPB1, GBF1, COPA, COPZ1, ARFGAP1
REACTOME_GLUCAGON_SIGNALING_IN_METABOLIC_REGULATION	22	-0.420726	0.559346	0.287734	4.54618e-07	3.40306e-06	PRKAR1A, GNB1, GNAS, GNB2, GNG10, PRKACB, PRKACA, PRKAR2B, ADCY7, GNG11, ADCY9, PRKAR2A, ADCY8, GNG7, GNG5, PRKACG, ADCY6, ADCY3, GNG12, PRKAR1B, ADCY2, ADCY1
BIOCARTA_DREAM_PATHWAY	12	-0.841554	1.07526	0.612333	4.63015e-07	3.446e-06	PRKAR1A, JUN, POLR2A, PRKACB, PRKAR2B, CREB1, PRKAR2A, PRKACG, CREM, FOS, MAPK3, PRKAR1B
REACTOME_N_GLYCAN_TRIMMING_IN_THE_ER_AND_CALNEXIN_CALRETICULIN_CYCLE	13	0.623261	0.407095	0.84154	5.11355e-07	3.78402e-06	CANX, MLEC, PRKCSH, CALR, EDEM1, PDIA3, MOGS, GANAB, UGGT1, EDEM2, MAN1B1, UGGT2, EDEM3
REACTOME_BETA_DEFENSINS	6	1.66846	1.33214	1.99117	5.28588e-07	3.87713e-06	TLR2, CCR2, CCR6, DEFB4A, TLR1, DEFB1
REACTOME_PI3K_EVENTS_IN_ERBB4_SIGNALING	30	0.455919	0.300497	0.605024	5.29925e-07	3.87713e-06	BAD, GSK3A, CDKN1A, NR4A1, FOXO1, RPS6KB2, HBEGF, CASP9, PTEN, FOXO3, CREB1, PIK3CA, PDPK1, FOXO4, EREG, NRG1, ERBB4, NRG2, AKT1, BTC, CDKN1B, CHUK, PIK3R1, AKT3, PHLPP1, TSC2, MDM2, MAPKAP1, TRIB3, MLST8
PID_A6B1_A6B4_INTEGRIN_PATHWAY	43	-0.574379	0.778625	0.368135	5.95233e-07	4.33049e-06	YWHAZ, YWHAQ, LAMC1, CD9, YWHAH, CDH1, SHC1, LAMB1, ITGA6, EGFR, LAMA4, LAMC2, RXRA, ERBB3, MET, LAMA3, RPS6KB1, PIK3CA, COL17A1, ITGB4, LAMA2, MST1R, MST1, EGF, AKT1, CASP7, IL1A, RAC1, YWHAB, RXRB, SFN, LAMB3, PMP22, LAMA5, YWHAE, ERBB2, ITGB1, PIK3R1, HRAS, PRKCA, GRB2, LAMB2, LAMC3
REACTOME_METABOLISM_OF_MRNA	171	0.18465	0.11345	0.257343	6.01218e-07	4.33954e-06	RPL35, RPL28, RPL11, RPL24, FAU, RPL18, RPS5, RPL34, RPL19, RPL9, RPL6, RPL10A, PSMB2, RNPS1, RPS24, HNRNPD, RPL14, RPS6, RPS7, RPL12, RPS25, RPS3A, YWHAZ, PPP2R1A, RPL7, RPL10, RPS27, RPLP1, PSMB7, HSPA1B, PSME1, RPS10, RPS15, PSMD8, RPL29, PSMD2, RPS21, RPL18A, PSMB1, PSMD4, RPL23, RPLP2, RPL8, RPS20, RPL31, RPLP0, ANP32A, RPS18, PSMF1, PSMC2, PSMA7, PSMD1, PSMD13, PSMC4, RPS16, PSMC3, PSMA5, E…
BIOCARTA_PARKIN_PATHWAY	9	0.85694	0.629007	1.08793	6.04427e-07	4.33954e-06	UBE2L3, UBE2L6, SNCA, SEPT5, SUMO1, UBE2G2, UBE2G1, GPR37, SNCAIP
REACTOME_METAL_ION_SLC_TRANSPORTERS	12	0.736487	0.499824	0.968597	6.0819e-07	4.33954e-06	SLC39A6, SLC39A7, HEPH, SLC31A1, CP, SLC30A3, SLC39A8, SLC11A1, SLC30A1, SLC30A5, SLC39A4, SLC39A2
REACTOME_FACILITATIVE_NA_INDEPENDENT_GLUCOSE_TRANSPORTERS	7	0.500688	0.375673	0.624045	6.11203e-07	4.33954e-06	SLC2A1, SLC2A3, SLC2A5, SLC2A8, SLC2A9, SLC2A6, SLC2A10
REACTOME_G_PROTEIN_ACTIVATION	13	0.672983	0.471701	0.878473	6.13233e-07	4.33954e-06	GNB1, GNB2, GNAI2, GNAI3, GNG10, GNB5, GNG11, GNAO1, GNAZ, GNG7, GNG5, GNAI1, GNG12
KEGG_CIRCADIAN_RHYTHM_MAMMAL	12	-0.965012	1.25816	0.683745	6.19735e-07	4.36172e-06	BHLHE40, CSNK1E, PER1, CLOCK, PER2, NPAS2, CSNK1D, CRY1, ARNTL, CRY2, PER3, BHLHE41
PID_SYNDECAN_1_PATHWAY	40	-0.484845	0.639793	0.336196	6.55449e-07	4.58814e-06	CCL5, SDCBP, PPIB, SDC1, COL6A3, COL3A1, COL1A1, COL1A2, PRKACA, COL5A1, COL15A1, MET, MMP9, COL7A1, MMP7, COL11A1, COL16A1, MMP1, COL17A1, COL9A3, COL10A1, CASK, MAPK1, BSG, COL6A2, HGF, LAMA5, COL13A1, COL4A1, MAPK3, COL6A1, COL14A1, COL4A5, COL9A2, COL4A6, COL4A4, COL11A2, HPSE, COL5A2, COL8A2
BIOCARTA_RARRXR_PATHWAY	15	0.462172	0.321487	0.605803	7.22633e-07	5.03124e-06	ERCC3, GTF2F1, RXRA, POLR2A, TBP, RARA, KAT2B, NCOA2, GTF2E1, GTF2A1, NCOA3, NCOR2, GTF2B, NCOA1, HDAC3
REACTOME_REGULATION_OF_KIT_SIGNALING	15	-0.649427	0.834819	0.462224	7.32517e-07	5.07278e-06	LYN, YES1, SH2B3, LCK, KIT, SH2B2, SOCS6, PTPN6, KITLG, SOCS1, FYN, SOS1, PRKCA, SRC, GRB2
PID_FOXM1_PATHWAY	38	0.559818	0.349507	0.76158	7.56207e-07	5.20898e-06	MMP2, CDC25B, CKS1B, BIRC5, CREBBP, LAMA4, GSK3A, EP300, PLK1, CDK4, MYC, FOXM1, MAP2K1, CCNB2, RB1, CDK1, ETV5, CCNA2, SKP2, XRCC1, CDK2, GAS1, NEK2, CENPA, TGFA, ESR1, CDKN2A, NFATC3, CENPF, BRCA2, CCND1, FOS, AURKB, CHEK2, CENPB, CCNE1, CCNB1, SP1
REACTOME_ION_CHANNEL_TRANSPORT	31	0.887059	0.702606	1.07536	7.6248e-07	5.2244e-06	ATP1B1, ARHGEF9, ATP1A2, ATP1B2, ATP7B, ATP2B2, ATP7A, GLRB, ATP2A1, FXYD2, ATP2C2, ATP12A, ATP2A3, GABRR2, GABRA4, ATP1B3, ATP2A2, ATP2C1, ATP8A1, ATP9A, ATP11B, ATP10D, ATP11A, ATP9B, ATP10B, ATP10A, ATP8B1, HTR3A, ATP8A2, ATP8B4, ATP1A1
REACTOME_AMINE_LIGAND_BINDING_RECEPTORS	10	1.10866	0.874016	1.33382	8.05771e-07	5.49196e-06	HRH1, ADRB2, HTR2B, HTR6, HTR2A, HTR4, ADRA2A, CHRM3, DRD2, HRH2
KEGG_TGF_BETA_SIGNALING_PATHWAY	72	0.255918	0.15598	0.351793	8.13117e-07	5.51302e-06	RHOA, PPP2R1A, SKP1, THBS1, PPP2CB, ID2, DCN, CREBBP, EP300, E2F4, MYC, SMAD4, LTBP1, ROCK2, PPP2R1B, SMAD2, THBS2, ZFYVE16, RPS6KB2, ACVR1, TFDP1, RPS6KB1, THBS4, SMAD7, BMPR1A, ZFYVE9, FST, SMAD5, INHBB, BMP2, RBL1, ACVR2A, SMAD3, SMURF2, COMP, BMP6, TGFBR1, SMAD6, TNF, TGFBR2, CDKN2B, PITX2, CUL1, INHBC, ID3, SMAD1, MAPK1, PPP2CA, ID1, ID4, THBS3, BMP7, TGFB3, TGFB2, BMPR2, IFNG, INHBA, INHBE,…
REACTOME_PLC_BETA_MEDIATED_EVENTS	33	0.279713	0.175151	0.386467	8.45279e-07	5.70123e-06	PRKAR1A, CALM2, GNAI2, GNAI3, ITPR3, PRKCD, ITPR2, PRKACB, PRKACA, PRKAR2B, ADCY7, PLCB4, PLCB2, CREB1, ADCY9, GNAO1, PRKAR2A, GNAZ, ADCY8, PRKACG, MAPK1, PDE1A, ADCY6, ADCY3, GNAI1, PLA2G4A, PLCB1, PRKAR1B, PRKCA, ADCY2, ADCY1, PLCB3, CALM1
REACTOME_PI3K_EVENTS_IN_ERBB2_SIGNALING	36	0.402879	0.25477	0.544968	9.16359e-07	6.14863e-06	BAD, EGFR, GSK3A, CDKN1A, NR4A1, ERBB3, FOXO1, RPS6KB2, HBEGF, CASP9, PTEN, FOXO3, CREB1, PIK3CA, PDPK1, FOXO4, EREG, NRG1, EGF, ERBB4, NRG2, GAB1, AKT1, BTC, CDKN1B, CHUK, ERBB2, PIK3R1, AKT3, PHLPP1, GRB2, TSC2, MDM2, MAPKAP1, TRIB3, MLST8
REACTOME_P38MAPK_EVENTS	12	-0.478443	0.652043	0.307475	9.4714e-07	6.3224e-06	MAPKAPK2, RALB, MAPK14, NRAS, MAPKAPK3, KRAS, RALGDS, MAPK13, MAPK11, HRAS, SRC, RALA
REACTOME_TGF_BETA_RECEPTOR_SIGNALING_ACTIVATES_SMADS	21	0.363275	0.23144	0.494107	9.67293e-07	6.42381e-06	FKBP1A, PPP1CC, PPP1CA, STRAP, PPP1CB, FURIN, PPP1R15A, SMAD4, SMAD2, SMAD7, ZFYVE9, SMAD3, SMURF2, TGFBR1, TGFBR2, XPO1, MTMR4, SMURF1, PMEPA1, STUB1, UCHL5
REACTOME_SIGNALING_BY_FGFR1_FUSION_MUTANTS	16	-0.295811	0.402476	0.191964	9.82656e-07	6.49255e-06	STAT1, BCR, CUX1, CPSF6, ZMYM2, PLCG1, STAT5A, GAB2, PIK3CA, TRIM24, STAT5B, FGFR1OP, CNTRL, STAT3, PIK3R1, GRB2
BIOCARTA_EDG1_PATHWAY	25	-0.410025	0.563837	0.25299	1.03113e-06	6.77824e-06	RHOA, GNB1, ITGAV, PDGFRA, PIK3CA, ITGB3, S1PR1, PDGFA, SMPD2, PIK3CG, AKT1, PTK2, PRKCB, MAPK1, RAC1, SMPD1, GNAI1, ASAH1, PLCB1, MAPK3, PIK3R1, PRKCA, ADCY1, SRC, SPHK1
KEGG_INSULIN_SIGNALING_PATHWAY	116	0.264937	0.161673	0.364005	1.05288e-06	6.88626e-06	BAD, RPS6, PRKAR1A, CALM2, PTPRF, HK1, PPP1CC, PPP1CA, RAF1, FLOT2, PPP1CB, PIK3R2, EIF4E, RHEB, SHC1, PYGB, GYS1, PRKAG1, PRKAB1, ARAF, PRKCZ, CRK, SREBF1, MAP2K2, NRAS, MAP2K1, PTPN1, FOXO1, TRIP10, PHKB, PRKACB, PIK3R3, INPP5K, PRKACA, PCK2, HK2, PYGL, MAPK9, INPP5D, SOCS2, ELK1, PRKAR2B, PHKG2, RPS6KB2, PIK3CD, KRAS, PRKX, RPS6KB1, PPP1R3C, PIK3CA, PDPK1, PPP1R3D, IRS1, MAPK10, PRKAR2A, SH2B2…
REACTOME_SIGNALLING_TO_RAS	24	-0.44989	0.612042	0.290863	1.06009e-06	6.89858e-06	RAF1, MAPKAPK2, SHC1, RALB, MAP2K2, MAPK14, NRAS, MAP2K1, MAPKAPK3, CDK1, KRAS, SHC3, MAPK1, YWHAB, RALGDS, MAPK13, MAPK11, MAPK3, SOS1, HRAS, SRC, SHC2, RALA, GRB2
PID_TCR_JNK_PATHWAY	11	-0.622922	0.828883	0.415385	1.06958e-06	6.92555e-06	JUN, CRK, MAP2K4, MAP3K8, LCP2, CRKL, MAP4K1, MAP3K7, PRKCB, LAT, MAP3K1
REACTOME_ACTIVATION_OF_NMDA_RECEPTOR_UPON_GLUTAMATE_BINDING_AND_POSTSYNAPTIC_EVENTS	24	0.394394	0.24814	0.534705	1.07687e-06	6.93807e-06	CALM2, RAF1, PRKACB, RPS6KA1, RPS6KA3, ACTN2, CREB1, PDPK1, RPS6KA2, GRIA2, BRAF, ADCY8, MAPK1, ADCY3, GRIA1, CAMK2B, GRIN1, AKAP9, RRAS, HRAS, ADCY1, CALM1, GRIN2C, NEFL
REACTOME_DEFENSINS	10	1.09811	0.825748	1.35943	1.09202e-06	7.00081e-06	CD4, TLR2, DEFA3, PRSS2, CCR2, CCR6, DEFB4A, ART1, TLR1, DEFB1
KEGG_RNA_POLYMERASE	23	0.479562	0.326342	0.634279	1.09822e-06	7.00588e-06	POLR2B, POLR2G, POLR2L, POLR2K, POLR2A, POLR2D, POLR3F, POLR3G, POLR1C, POLR3D, POLR2C, POLR2H, POLR3C, POLR2F, POLR2J, POLR2I, POLR2E, POLR2J3, POLR1D, POLR3K, POLR1E, POLR3B, POLR1B
REACTOME_SYNTHESIS_OF_PC	10	0.34961	0.233021	0.463957	1.12482e-06	7.14042e-06	LPIN2, CHKB, PCYT1A, CHKA, PEMT, PCYT1B, LPIN1, CEPT1, CHPT1, SLC44A1
PID_RHODOPSIN_PATHWAY	13	0.815048	0.601157	1.0334	1.15649e-06	7.30561e-06	GNB1, GNB5, SLC24A1, CNGA1, RHO, RGS9, PDE6A, GUCY2D, RDH5, PDE6B, CNGB1, GUCA1B, LRAT
REACTOME_RNA_POL_III_CHAIN_ELONGATION	14	0.593576	0.420089	0.762491	1.1657e-06	7.32808e-06	POLR2L, POLR2K, POLR3F, POLR1C, POLR3D, POLR2H, POLR3C, POLR2F, POLR2E, POLR3E, POLR1D, POLR3K, LZTS1, POLR3B
REACTOME_ION_TRANSPORT_BY_P_TYPE_ATPASES	26	0.962184	0.752724	1.16316	1.2114e-06	7.57858e-06	ATP1B1, ATP1A2, ATP1B2, ATP7B, ATP2B2, ATP7A, ATP2A1, FXYD2, ATP2C2, ATP12A, ATP2A3, ATP1B3, ATP2A2, ATP2C1, ATP8A1, ATP9A, ATP11B, ATP10D, ATP11A, ATP9B, ATP10B, ATP10A, ATP8B1, ATP8A2, ATP8B4, ATP1A1
REACTOME_POST_CHAPERONIN_TUBULIN_FOLDING_PATHWAY	15	-0.426145	0.575956	0.274871	1.23855e-06	7.71117e-06	TUBA1B, TBCD, TBCB, TUBB3, TBCC, TBCA, TBCE, TUBB2A, TUBB4B, TUBA1A, TUBB6, TUBA1C, TUBA3C, TUBA4A, TUBB2B
PID_HEDGEHOG_2PATHWAY	14	0.453546	0.300204	0.600663	1.24507e-06	7.71466e-06	LRPAP1, ARRB2, PIK3CA, GAS1, STIL, PTHLH, GLI2, AKT1, CDON, PTCH1, TGFB2, PIK3R1, SMO, HHAT
REACTOME_RNA_POL_III_TRANSCRIPTION_TERMINATION	16	0.515853	0.36213	0.665524	1.29863e-06	8.00821e-06	SSB, POLR2L, POLR2K, POLR3F, POLR1C, POLR3D, NFIB, POLR2H, POLR3C, POLR2F, POLR2E, POLR3E, POLR1D, POLR3K, LZTS1, POLR3B
PID_INTEGRIN4_PATHWAY	10	-0.945488	1.26354	0.632252	1.44103e-06	8.84426e-06	LAMC1, LAMB1, ITGA6, LAMC2, LAMA3, ITGB4, LAMA2, LAMB3, LAMA5, LAMB2
REACTOME_BASIGIN_INTERACTIONS	22	0.707692	0.528076	0.880015	1.52101e-06	9.29111e-06	SLC3A2, SLC7A5, ATP1B1, PPIA, ITGA3, SLC16A1, SLC7A8, SLC16A3, CAV1, SLC7A6, ATP1B2, MMP1, L1CAM, SLC7A7, SPN, PPIL2, BSG, ATP1B3, SLC7A11, ITGB1, MAG, SLC16A8
PID_MYC_REPRESS_PATHWAY	57	0.255498	0.156455	0.356617	1.53484e-06	9.30858e-06	CCL5, NDRG1, FTH1, LGALS1, HDAC1, ID2, ALDH9A1, ITGA6, SFRP1, TJP2, NFYC, EP300, PDGFRB, CDKN1A, COL1A2, MYC, SMAD4, CSDE1, SMAD2, TBP, ZBTB17, BCL2, GADD45A, CEBPD, CEBPA, IRF8, NFYA, FOXO3, CREB1, BRCA1, DKK1, HMGCS2, ITGB4, RBL1, SPI1, SMAD3, S100A7, WNT5A, NDRG2, GFI1, CDKN2B, MAX, CFLAR, CCND1, CLU, CDKN1B, DDIT3, SLC11A1, MXD4, ERBB2, ITGB1, ZFP36L1, SP1, TSC2, HDAC3, SFXN3, NFYB
BIOCARTA_CDMAC_PATHWAY	16	-0.841521	1.14152	0.553692	1.53825e-06	9.30858e-06	RAF1, JUN, NFKBIA, RELA, MYC, MAP2K1, TNF, PRKCB, MAPK1, FOS, NFKB1, PLCB1, MAPK3, HRAS, PRKCA, CUZD1
REACTOME_INTERFERON_SIGNALING	116	0.488856	0.294894	0.674928	1.55028e-06	9.33771e-06	UBA7, EIF4G2, STAT1, KPNA2, EIF4A3, IFITM2, EIF4E, UBE2N, RAE1, IFITM1, IFNGR2, JAK1, UBE2L6, EGR1, RANBP2, TPR, ADAR, ARIH1, B2M, EIF4G3, KPNA1, MX1, NUP153, NUP62, NUP214, NUP133, NUP93, GBP1, IFI27, IRF1, PRKCD, IRF6, IRF3, ICAM1, PTPN1, IFNGR1, GBP2, PLCG1, SP100, OAS1, NUP88, PIN1, IFIT1, IRF2, VCAM1, IRF9, NUPL2, IRF8, IFNAR1, EIF2AK2, IFI6, CD44, IRF4, ISG20, IFIT3, IFNAR2, PTPN2, OAS2, MX…
REACTOME_THROMBIN_SIGNALLING_THROUGH_PROTEINASE_ACTIVATED_RECEPTORS_PARS	20	-0.614097	0.830565	0.406416	1.56131e-06	9.36064e-06	GNB1, GNB2, GNG10, GNAQ, ARRB2, F2R, GNB5, GNG11, GNA11, GNA15, GNG7, GNA13, GNG5, MAPK1, MAPK3, GNG12, SRC, ARRB1, GNA14, GNA12
BIOCARTA_ERYTH_PATHWAY	9	0.451573	0.308546	0.597581	1.67543e-06	9.99856e-06	IL6, FLT3, KITLG, IL1A, IGF1, TGFB3, TGFB2, CSF2, EPO
REACTOME_GLUTAMATE_NEUROTRANSMITTER_RELEASE_CYCLE	11	0.47199	0.303013	0.643241	1.68328e-06	9.99932e-06	VAMP2, STXBP1, SNAP25, UNC13B, GLS, SLC17A7, RAB3A, GLS2, SLC1A6, SLC1A1, SLC38A2
REACTOME_POST_NMDA_RECEPTOR_ACTIVATION_EVENTS	22	0.398492	0.248515	0.542379	1.75178e-06	1.03587e-05	CALM2, RAF1, PRKACB, RPS6KA1, RPS6KA3, ACTN2, CREB1, PDPK1, RPS6KA2, BRAF, ADCY8, MAPK1, ADCY3, CAMK2B, GRIN1, AKAP9, RRAS, HRAS, ADCY1, CALM1, GRIN2C, NEFL
BIOCARTA_RAC1_PATHWAY	23	0.337326	0.210904	0.464984	1.77263e-06	1.04343e-05	PLD1, CFL1, PPP1R12B, ARFIP2, MYLK, RALBP1, PDGFRA, WASF1, RPS6KB1, CDK5, LIMK1, PIK3CA, CDK5R1, VAV1, PIK3CG, TRIO, RAC1, PAK1, MYL2, NCF2, PIK3R1, CHN1, MAP3K1
KEGG_PURINE_METABOLISM	117	0.245237	0.148503	0.343999	1.80822e-06	1.04991e-05	GUK1, PAICS, POLD2, NME2, RRM1, NME1, PNP, ENTPD6, POLR2B, RRM2, IMPDH2, ADSL, POLR2G, POLR2L, AK1, POLR2K, POLR2A, HPRT1, POLD4, PAPSS2, APRT, DCK, PRPS2, POLD1, POLR2D, PDE4B, ADCY7, DGUOK, GUCY1B3, NT5E, ENTPD4, PDE6D, ADK, PDE2A, IMPDH1, GMPR, NPR2, AK4, POLA2, PDE4D, ADCY9, ADA, NPR1, PDE4A, POLA1, NME3, PRIM1, ENPP1, POLR3F, PDE10A, PDE9A, PRIM2, ENTPD5, NME6, POLE2, AK2, AMPD1, ENTPD3, NME…
REACTOME_INHIBITION_OF_VOLTAGE_GATED_CA2_CHANNELS_VIA_GBETA_GAMMA_SUBUNITS	12	0.744521	0.546072	0.934927	1.81542e-06	1.04991e-05	GNB1, GNB2, GNG10, GABBR1, KCNJ2, GNG7, GNG5, KCNJ5, GABBR2, KCNJ15, GNG12, KCNJ16
REACTOME_NCAM_SIGNALING_FOR_NEURITE_OUT_GROWTH	51	-0.358704	0.498498	0.215979	1.81664e-06	1.04991e-05	SPTBN1, RAF1, PRNP, COL6A3, COL3A1, COL1A1, COL1A2, MAP2K2, NRAS, MAP2K1, CDK1, COL5A1, KRAS, CREB1, RPS6KA5, COL9A3, SPTBN2, GFRA1, CACNA1H, CACNB1, CACNB4, CACNB2, PTK2, FGFR1, MAPK1, SPTAN1, YWHAB, COL6A2, CACNB3, FYN, ARTN, CACNA1G, NRTN, COL4A2, COL4A1, MAPK3, COL6A1, AGRN, SOS1, NCAM1, HRAS, COL4A5, SRC, COL9A2, SPTB, COL4A4, GRB2, CACNA1S, SPTBN5, GFRA4, COL5A2
KEGG_GLYCOSPHINGOLIPID_BIOSYNTHESIS_LACTO_AND_NEOLACTO_SERIES	17	0.392794	0.260822	0.52753	1.81906e-06	1.04991e-05	B4GALT1, ST3GAL4, B3GNT3, FUT1, FUT2, B4GALT2, FUT4, ST8SIA1, B4GALT3, FUT6, B4GALT4, ST3GAL6, FUT3, ABO, FUT7, B3GNT2, B3GNT4
KEGG_PYRIMIDINE_METABOLISM	76	0.255707	0.156424	0.353075	1.82417e-06	1.04991e-05	POLD2, TXNRD1, NME2, RRM1, DCTD, NME1, PNP, ENTPD6, POLR2B, RRM2, POLR2G, TK1, POLR2L, TYMS, POLR2K, UMPS, CAD, POLR2A, POLD4, UPP1, DTYMK, DCK, POLD1, POLR2D, NT5E, ENTPD4, TK2, POLA2, DPYD, POLA1, TYMP, NME3, PRIM1, POLR3F, CDA, PRIM2, ENTPD5, NME6, POLE2, ENTPD3, NME5, POLR3G, POLR1C, ENTPD1, POLR3D, POLE3, DUT, POLR2C, NT5C2, ITPA, POLR2H, POLR3C, POLR2F, UCK2, TXNRD2, NME4, POLR2J, POLD3, PO…
BIOCARTA_SARS_PATHWAY	10	-0.494887	0.673128	0.320075	1.95723e-06	1.12151e-05	NCL, LDHA, LDHB, EIF4E, MAPK14, ANPEP, CKM, GPT, LDHC, FBL
REACTOME_MITOCHONDRIAL_TRNA_AMINOACYLATION	15	0.577029	0.366652	0.784609	2.0291e-06	1.15757e-05	KARS, LARS2, FARS2, GARS, HARS2, QARS, IARS2, CARS2, DARS2, YARS2, SARS2, WARS2, NARS2, PPA2, TARS2
REACTOME_ACTIVATION_OF_KAINATE_RECEPTORS_UPON_GLUTAMATE_BINDING	18	0.442341	0.283376	0.594857	2.06984e-06	1.17563e-05	CALM2, GNB1, GNB2, GNG10, DLG1, GNB5, PLCB2, GNG11, GNG7, GNG5, DLG3, NCALD, PLCB1, GNG12, PLCB3, CALM1, GRIK2, GRIK5
BIOCARTA_BARRESTIN_PATHWAY	8	-0.558924	0.770717	0.355722	2.14265e-06	1.21168e-05	AP2M1, GNB1, GNAS, PPARA, PLCB1, ADCY1, DNM1, ARRB1
KEGG_STEROID_HORMONE_BIOSYNTHESIS	31	0.828985	0.550677	1.11312	2.58496e-06	1.45545e-05	CYP1B1, CYP19A1, STS, HSD11B2, AKR1C1, HSD3B1, UGT1A4, SRD5A1, HSD17B2, HSD11B1, HSD17B6, CYP1A1, SULT2B1, CYP3A5, HSD17B1, CYP3A4, UGT1A1, SRD5A2, CYP7B1, UGT2A1, COMT, AKR1C3, AKR1C2, UGT2B28, HSD17B8, CYP21A2, CYP11B2, HSD17B12, SRD5A3, SULT1E1, HSD17B7
REACTOME_P130CAS_LINKAGE_TO_MAPK_SIGNALING_FOR_INTEGRINS	12	-0.712546	0.888117	0.544087	2.74622e-06	1.53955e-05	RAP1B, VWF, CRK, RAP1A, TLN1, ITGB3, ITGA2B, PTK2, FN1, SRC, FGG, APBB1IP
REACTOME_ARMS_MEDIATED_ACTIVATION	14	-0.429324	0.598263	0.262948	2.85817e-06	1.59528e-05	RAF1, CRK, RAP1A, MAP2K2, NRAS, MAP2K1, CDK1, KRAS, BRAF, MAPK1, YWHAB, MAPK3, KIDINS220, HRAS
KEGG_MELANOMA	53	0.462659	0.311573	0.61691	2.87027e-06	1.59528e-05	BAD, CDH1, RAF1, PIK3R2, TP53, ARAF, EGFR, CDK4, PDGFRB, CDKN1A, MAP2K2, NRAS, MAP2K1, PIK3R3, PDGFRA, RB1, MET, IGF1R, E2F3, PIK3CD, KRAS, PTEN, PDGFB, PIK3CA, FGF2, FGF13, FGF1, PDGFA, FGF7, BRAF, EGF, PIK3CG, FGF18, CDKN2A, AKT1, MITF, FGFR1, MAPK1, FGF6, CCND1, IGF1, HGF, FGF5, MAPK3, PIK3R1, AKT3, PIK3CB, HRAS, MDM2, PDGFC, PDGFD, PIK3R5, FGF22
REACTOME_CYCLIN_A_B1_ASSOCIATED_EVENTS_DURING_G2_M_TRANSITION	15	0.783228	0.523044	1.04886	2.88985e-06	1.59929e-05	CDC25B, PLK1, CCNB2, CDK1, CCNA2, MNAT1, CCNH, PKMYT1, CDC25A, CDC25C, CCNA1, XPO1, CDK7, WEE1, CCNB1
KEGG_NEUROTROPHIN_SIGNALING_PATHWAY	107	0.28251	0.166779	0.400668	3.0025e-06	1.65457e-05	BAD, RHOA, CALM2, YWHAZ, YWHAQ, RAP1B, YWHAH, ARHGDIA, RAF1, ARHGDIB, PIK3R2, MAPKAPK2, JUN, SHC1, NFKBIA, IRAK1, TP53, RELA, ABL1, CRK, CSK, RAP1A, MAP2K2, MAPK14, PRKCD, NRAS, MAP2K1, PIK3R3, PLCG1, MAPK9, SH2B3, RPS6KA1, PSEN1, MAP3K3, BCL2, MAP3K5, RPS6KA3, PIK3CD, NFKBIE, KRAS, FOXO3, PIK3CA, PDPK1, PLCG2, RPS6KA4, RPS6KA5, IRS1, MAP2K5, MAPK10, RPS6KA2, ZNF274, SH2B2, TRAF6, NGFR, PTPN11, B…
REACTOME_GRB2_SOS_PROVIDES_LINKAGE_TO_MAPK_SIGNALING_FOR_INTERGRINS_	13	-0.710767	0.900886	0.516677	3.01867e-06	1.65643e-05	RAP1B, VWF, RAP1A, TLN1, ITGB3, ITGA2B, PTK2, FN1, SOS1, SRC, GRB2, FGG, APBB1IP
BIOCARTA_VDR_PATHWAY	12	0.304797	0.183972	0.42379	3.0459e-06	1.65996e-05	NCOR1, HDAC1, CREBBP, EP300, RXRA, MED1, KAT2B, NCOA2, NCOA3, NCOA1, CARM1, TSC2
REACTOME_MRNA_DECAY_BY_5_TO_3_EXORIBONUCLEASE	11	0.465619	0.317616	0.616714	3.05074e-06	1.65996e-05	LSM3, EDC4, LSM4, LSM5, LSM1, DDX6, LSM6, LSM2, DCP2, DCP1A, EDC3
PID_S1P_S1P1_PATHWAY	21	0.361605	0.21889	0.507311	3.34574e-06	1.81286e-05	RHOA, GNAI2, GNAI3, PDGFRB, ITGAV, PLCG1, ABCC1, KDR, PLCB2, PDGFB, ITGB3, S1PR1, PTGS2, GNAO1, GNAZ, MAPK1, RAC1, GNAI1, VEGFA, MAPK3, SPHK1
BIOCARTA_RELA_PATHWAY	16	-0.424319	0.592565	0.262906	3.45835e-06	1.86607e-05	TRADD, NFKBIA, RELA, CREBBP, EP300, FADD, TNFRSF1B, TRAF6, TNF, TNFRSF1A, NFKB1, IKBKB, CHUK, IKBKG, RIPK1, HDAC3
REACTOME_POST_TRANSLATIONAL_MODIFICATION_SYNTHESIS_OF_GPI_ANCHORED_PROTEINS	20	-0.239265	0.337295	0.143825	3.64621e-06	1.95927e-05	GPAA1, DPM1, PIGC, PIGQ, PIGF, PIGA, PIGB, PIGL, DPM2, PIGH, PIGK, PIGO, PLAUR, PGAP1, PIGT, PIGG, PIGN, PIGV, DPM3, PIGP
PID_REG_GR_PATHWAY	70	0.356931	0.235127	0.47379	3.76782e-06	2.01625e-05	STAT1, FKBP4, YWHAH, SMARCC1, HDAC1, SMARCC2, JUN, EGR1, SGK1, TP53, TSG101, RELA, KRT5, HDAC2, NR3C1, PPP5C, CREBBP, EP300, CDKN1A, NR4A1, MAPK14, IRF1, ICAM1, PRKACB, PRKACA, PCK2, STAT5A, TBP, SMARCD1, MAPK9, CDK5, CREB1, MMP1, FKBP5, CGA, MAPK10, CDK5R1, VIPR1, STAT5B, IL6, PBX1, SPI1, NCOA2, SELE, POU2F1, NR1I3, AKT1, PRKACG, IL13, CSN2, NFATC1, MAPK1, BAX, SUMO2, SMARCA4, NCOA1, FOS, NFKB1,…
SA_TRKA_RECEPTOR	14	0.67007	0.433064	0.902514	3.81663e-06	2.03396e-05	RHOA, SHC1, CDKN1A, MAP2K2, MAP2K1, ELK1, PIK3CD, PIK3CA, NGFR, AKT1, AKT3, SOS1, HRAS, GRB2
REACTOME_BILE_SALT_AND_ORGANIC_ANION_SLC_TRANSPORTERS	6	0.781147	0.481656	1.07274	4.09766e-06	2.17478e-05	SLC16A1, SLC16A3, SLC13A3, SLC16A7, SLC47A1, SLC16A8
REACTOME_SHC_MEDIATED_SIGNALLING	15	-0.542229	0.741853	0.344535	4.16843e-06	2.19944e-05	RAF1, SHC1, MAP2K2, NRAS, MAP2K1, CDK1, KRAS, SHC3, MAPK1, YWHAB, MAPK3, SOS1, HRAS, SHC2, GRB2
REACTOME_REMOVAL_OF_THE_FLAP_INTERMEDIATE_FROM_THE_C_STRAND	10	-0.400625	0.556112	0.248132	4.17809e-06	2.19944e-05	POLD2, PCNA, RPA1, RPA2, POLD4, POLD1, FEN1, RPA3, POLD3, DNA2
ST_B_CELL_ANTIGEN_RECEPTOR	37	0.453575	0.293844	0.616653	4.23222e-06	2.21892e-05	BAD, RAF1, SHC1, NFKBIA, BCR, CSK, MAP2K2, LYN, MAP2K1, PI3, ITPKB, PIK3CD, NFKBIE, PIK3CA, PLCG2, DAG1, BTK, ITPKA, VAV1, CD19, TONSL, AKT1, NFKB2, SYK, BLNK, NFAT5, MAPK1, NFKB1, EPHB2, NFKBIL1, SOS2, PIK3R1, AKT3, SOS1, NFKBIB, GRB2, PPP1R13B
REACTOME_DEVELOPMENTAL_BIOLOGY	290	0.181779	0.104525	0.255913	4.77854e-06	2.49524e-05	CFL1, RHOA, HSP90AB1, MSN, AP2B1, AP2M1, CLTC, CAP1, PFN1, SPTBN1, DPYSL2, CTNNA1, LAMC1, NCOR1, RHOC, SDCBP, CLTA, ABLIM1, MYL9, PITPNA, RAF1, PRNP, ARHGEF12, ITGA5, CSNK2B, DPYSL3, COL6A3, MYH11, LAMB1, CTNNB1, CCND3, RELA, COL3A1, TBL1X, FURIN, ALCAM, CCNC, MYO10, EGFR, ARHGAP35, AP2S1, ABL1, CREBBP, LIMK2, VASP, EP300, CDK4, DNM2, SREBF1, COL1A1, ITGAV, COL1A2, MAP2K2, RXRA, DLG1, CRMP1, SMAD…
REACTOME_MITOTIC_M_M_G1_PHASES	145	0.277762	0.160403	0.397583	5.03938e-06	2.62088e-05	PSMB2, RAD21, PPP2R1A, MAPRE1, PPP1CC, RPS27, PSMB7, PAFAH1B1, PSME1, PSMD8, PSMD2, PSMB1, PSMD4, PSMF1, PSMC2, PSMA7, NUDC, PSMD1, PSMD13, PSMC4, PSMC3, PSMA5, PSMA2, PPP2CB, PSMD3, PSMB3, BUB3, RPA1, PSMA3, MCM3, SMC1A, PSMA1, PSMC6, PSMD7, RANBP2, MCM5, RPA2, PSME2, PPP2R5C, MCM6, CLIP1, BIRC5, MCM2, NUP133, PPP2R5A, PLK1, PSMB4, STAG1, PMF1, PSMD12, PPP2R5D, PSMB10, PSMA6, PSMD6, CDC20, PPP2R…
KEGG_GLYCEROPHOSPHOLIPID_METABOLISM	48	-0.217181	0.30832	0.129747	5.16025e-06	2.67301e-05	PLD1, CDIPT, PTDSS1, LPCAT1, GNPAT, LYPLA2, PISD, LPGAT1, LPCAT3, LYPLA1, DGKA, PLA2G2A, TAZ, CHKB, PCYT1A, CHKA, LCAT, PLA2G15, PLA2G6, GPD1, CDS1, PLA2G5, DGKE, DGKZ, PEMT, DGKD, MBOAT7, PCYT2, PLD2, GPD2, PLA2G4A, PCYT1B, AGPAT2, GPD1L, CDS2, LPCAT4, MBOAT2, AGPAT1, ETNK1, PGS1, AGPAT4, AGPAT3, PLA2G2D, PLA2G3, PTDSS2, PLA2G12A, PLA2G2F, CHPT1
BIOCARTA_CACAM_PATHWAY	7	0.898499	0.574263	1.2196	5.26244e-06	2.71508e-05	CALM2, CREB1, CAMK1, CAMK2B, CAMKK2, CAMK2G, CALM1
BIOCARTA_PML_PATHWAY	15	-0.394571	0.546407	0.239556	5.38502e-06	2.7673e-05	TP53, DAXX, CREBBP, SP100, RB1, TNFRSF1B, RARA, FAS, PML, TNF, TNFRSF1A, SUMO1, FASLG, HRAS, SIRT1
REACTOME_SIGNALLING_TO_ERKS	31	-0.29629	0.41506	0.176359	5.50387e-06	2.8172e-05	RAF1, MAPKAPK2, SHC1, RALB, CRK, RAP1A, MAP2K2, MAPK14, NRAS, MAP2K1, MAPKAPK3, PLCG1, CDK1, KRAS, BRAF, SHC3, MAPK1, YWHAB, RALGDS, RIT1, MAPK13, MAPK11, MAPK3, KIDINS220, SOS1, HRAS, SRC, SHC2, RALA, GRB2, FRS2
BIOCARTA_BARR_MAPK_PATHWAY	11	-0.508045	0.706923	0.305004	5.57276e-06	2.84123e-05	GNB1, GNAS, RAF1, MAP2K2, MAP2K1, MAPK1, PLCB1, MAPK3, ADCY1, DNM1, ARRB1
REACTOME_MITOCHONDRIAL_FATTY_ACID_BETA_OXIDATION	13	-0.724582	0.993651	0.457557	5.79944e-06	2.9452e-05	ACADVL, HADHB, HADH, ECHS1, ACADS, DECR1, ACADM, MUT, PCCA, ACADL, HADHA, ECI1, PCCB
PID_UPA_UPAR_PATHWAY	33	-0.60751	0.808212	0.40261	5.91712e-06	2.99323e-05	NCL, LRP1, ITGB5, ITGA5, ITGA3, EGFR, CRK, PDGFRB, ITGAV, SERPINE1, ITGB2, DOCK1, MMP9, MMP12, ITGB3, FPR1, PLAU, CTSG, ITGAM, MMP3, MMP13, GPLD1, ELANE, RAC1, VLDLR, HGF, FN1, PLAUR, ITGB1, SRC, FPR3, PDGFD, FGG
REACTOME_SCFSKP2_MEDIATED_DEGRADATION_OF_P27_P21	51	0.2672	0.155521	0.381221	6.47575e-06	3.25953e-05	PSMB2, SKP1, PSMB7, PSME1, PSMD8, PSMD2, PSMB1, PSMD4, PSMF1, PSMC2, PSMA7, PSMD1, PSMD13, PSMC4, PSMC3, PSMA5, PSMA2, PSMD3, PSMB3, PSMA3, PSMA1, PSMC6, PSMD7, PSME2, CKS1B, PSMB4, CDKN1A, PSMD12, PSMB10, PSMA6, PSMD6, PSMA4, CCNA2, PSMD5, SKP2, PSMC1, CDK2, PSMB9, CCNE2, CCNA1, CUL1, PSMD9, PSMD11, PSMB5, PSMB6, PSMB8, CDKN1B, PSMC5, PSMD14, CCNE1, PSMD10
KEGG_CELL_ADHESION_MOLECULES_CAMS	86	0.384526	0.22034	0.542041	6.49389e-06	3.25953e-05	PTPRF, CD99, CDH1, SDC1, CLDN4, ITGA6, MPZL1, ALCAM, SDC4, ITGAV, ICAM1, CLDN7, ITGB2, SDC3, CDH3, PTPRM, CDH2, CD4, VCAM1, CLDN3, NRCAM, NEO1, CLDN5, SELL, CD22, L1CAM, VCAN, CDH5, ICAM2, ICAM3, CD40, CD58, CLDN10, CD86, ITGB7, CD8A, ITGAM, CD2, ITGA4, SELP, SPN, SELE, CD28, PTPRC, CD226, CD40LG, GLG1, CD8B, PECAM1, CADM1, CD34, SELPLG, NRXN1, OCLN, NRXN2, MPZ, ICOS, ICOSLG, CNTN1, CADM3, CD6, I…
REACTOME_CELL_SURFACE_INTERACTIONS_AT_THE_VASCULAR_WALL	74	0.308856	0.183137	0.429468	6.78028e-06	3.39014e-05	SLC3A2, SLC7A5, ATP1B1, PPIA, ITGA5, PIK3R2, SHC1, ITGA3, SLC16A1, COL1A1, ITGAV, COL1A2, LYN, NRAS, SLC7A8, PLCG1, ITGB2, SLC16A3, SIRPA, YES1, CAV1, SLC7A6, THBD, CXADR, KRAS, CD48, FCER1G, ATP1B2, PIK3CA, MMP1, SELL, L1CAM, SLC7A7, ITGB3, LCK, APOB, CD58, ANGPT2, ANGPT1, ITGAM, CD2, MERTK, SELP, SPN, PPIL2, GRB14, PTPN6, TEK, PROS1, BSG, ATP1B3, PECAM1, SLC7A11, FYN, ITGAX, FN1, GRB7, CD47, IT…
BIOCARTA_CBL_PATHWAY	11	-0.717852	0.986102	0.451641	6.84915e-06	3.4114e-05	EGFR, CSF1R, PDGFRA, MET, EGF, PRKCB, SH3GLB1, PRKCA, SRC, GRB2, SH3GLB2
REACTOME_PI3K_AKT_ACTIVATION	29	0.376919	0.217602	0.532964	6.9265e-06	3.43671e-05	BAD, RHOA, PIK3R2, GSK3A, CDKN1A, NR4A1, FOXO1, RPS6KB2, CASP9, PTEN, FOXO3, CREB1, PIK3CA, PDPK1, IRS1, FOXO4, AKT1, CDKN1B, IRS2, CHUK, PIK3R1, AKT3, PIK3CB, PHLPP1, TSC2, MDM2, MAPKAP1, TRIB3, MLST8
PID_HDAC_CLASSI_PATHWAY	57	0.160825	0.0975344	0.225441	7.10511e-06	3.51187e-05	YY1, RAN, NCOR1, RBBP7, CHD4, HDAC1, WDR77, NFKBIA, RANBP2, RELA, HDAC2, CREBBP, EP300, HDAC5, MBD3, MBD2, PRKACA, KAT2B, HDAC4, SMAD7, NR2C1, SAP30, HDAC9, HDAC6, MXD1, TNF, TFCP2, TNFRSF1A, NCOR2, GATA2, MAX, PPARG, SAP18, UBE2I, SUMO1, XPO1, CHD3, STAT3, NFKB1, SIN3B, RBBP4, RANGAP1, SMG5, SMURF1, HDAC3, PRMT5, HDAC7, FKBP3, GATAD2A, SIRT7, SIRT1, SIRT5, SIRT6, HDAC11, SIRT4, SIRT2, SIRT3
BIOCARTA_PLATELETAPP_PATHWAY	9	-0.700475	0.936026	0.46	7.16394e-06	3.5253e-05	APP, PLAT, SERPINE1, PLAU, COL4A2, COL4A1, COL4A5, COL4A6, COL4A4
REACTOME_PI_3K_CASCADE	39	0.406444	0.278733	0.53683	7.1867e-06	3.5253e-05	BAD, GSK3A, CDKN1A, NR4A1, FOXO1, FGFR2, RPS6KB2, CASP9, PTEN, FOXO3, CREB1, PIK3CA, FGFR3, FGF2, PDPK1, FGFR4, FGF1, FOXO4, FGF7, KL, FGF18, GAB1, AKT1, FGFR1, FGF6, CDKN1B, CHUK, FGF5, PIK3R1, AKT3, PHLPP1, GRB2, TSC2, MDM2, MAPKAP1, TRIB3, MLST8, FRS2, FGF22
PID_INTEGRIN_A4B1_PATHWAY	30	-0.37955	0.514632	0.248035	7.40488e-06	3.61861e-05	PRKAR1A, YWHAZ, CD81, PXN, THBS1, CD14, CRK, PRKACB, PRKACA, THBS2, PTK2B, DOCK1, TLN1, ARF6, VCAM1, MYH2, ITGA4, ADAM28, PTK2, RAC1, ABI1, MDK, SPP1, FN1, ITGB1, PRKAR1B, SRC, PTPRA, GIT1, JAM2
PID_ECADHERIN_STABILIZATION_PATHWAY	37	-0.471202	0.667301	0.277711	7.69507e-06	3.74628e-05	RHOA, CTNNA1, ZYX, VCL, CDH1, CTNNB1, EGFR, EFNA1, VASP, LPP, MYO6, ARF6, EPHA2, MET, STX4, IGF1R, AQP3, NCK1, EGF, NCKAP1, CTNND1, ACTN1, ABI1, DIAPH1, IGF1, KIFC3, MYL2, MGAT3, HGF, PIP5K1C, EXOC3, ROCK1, AQP5, CYFIP2, ENAH, LIMA1, GIT1
REACTOME_GABA_RECEPTOR_ACTIVATION	26	0.406658	0.258701	0.548608	7.74732e-06	3.7576e-05	GNB1, GNB2, GNAI2, GNAI3, GNG10, GABBR1, ARHGEF9, ADCY7, ADCY9, GNAL, KCNJ2, ADCY8, GNG7, GNG5, GABRR2, KCNJ5, GABRA4, ADCY6, ADCY3, GNAI1, GABBR2, KCNJ15, GNG12, ADCY2, ADCY1, KCNJ16
REACTOME_SHC_RELATED_EVENTS	16	-0.489797	0.684432	0.303064	7.96811e-06	3.85026e-05	RAF1, SHC1, MAP2K2, NRAS, MAP2K1, CDK1, KRAS, SHC3, INSR, MAPK1, YWHAB, MAPK3, SOS1, HRAS, SHC2, GRB2
REACTOME_CD28_DEPENDENT_VAV1_PATHWAY	10	0.780734	0.491713	1.0642	8.26744e-06	3.98005e-05	LCK, CD86, VAV1, CD28, RAC1, CDC42, PAK2, PAK1, FYN, GRB2
REACTOME_INHIBITION_OF_REPLICATION_INITIATION_OF_DAMAGED_DNA_BY_RB1_E2F1	11	-0.306139	0.419132	0.192043	9.29925e-06	4.4602e-05	PPP2R1A, PPP2CB, PPP2R1B, RB1, TFDP1, POLA2, POLA1, PRIM1, PRIM2, PPP2CA, PPP2R3B
NABA_SECRETED_FACTORS	185	0.349449	0.201917	0.500049	9.60934e-06	4.59191e-05	CCL5, S100A11, S100A10, SFRP1, IGF2, HCFC1, S100A13, TNFSF10, CXCL8, S100A8, S100A4, S100A9, FSTL3, CXCL12, VEGFB, CX3CL1, FRZB, HBEGF, CXCL9, SFRP4, CCL4, PDGFB, S100A2, S100P, FGF2, CXCL1, CXCL10, CCL21, WIF1, FST, FGFBP1, TGFA, IL1B, FGF13, FGF1, IL6, AREG, CXCL13, INHBB, LIF, BMP2, S100A1, CCL14, PDGFA, CRLF3, CCL20, ANGPT2, ANGPT1, TNFSF12, MST1, WNT2, EREG, FGF7, S100A12, S100A7, CRHBP, WNT…
REACTOME_REPAIR_SYNTHESIS_FOR_GAP_FILLING_BY_DNA_POL_IN_TC_NER	14	-0.372025	0.53014	0.216957	9.88129e-06	4.70451e-05	RFC2, POLD2, PCNA, RPA1, RPA2, POLD4, RFC5, POLD1, RFC4, RFC3, POLE2, RPA3, POLD3, POLE
KEGG_GLIOMA	54	0.321768	0.181075	0.459747	1.0207e-05	4.84178e-05	CALM2, RAF1, PIK3R2, SHC1, TP53, ARAF, EGFR, CDK4, PDGFRB, CDKN1A, MAP2K2, NRAS, MAP2K1, PIK3R3, PLCG1, PDGFRA, RB1, IGF1R, E2F3, PIK3CD, KRAS, PTEN, PDGFB, PIK3CA, PLCG2, TGFA, PDGFA, BRAF, EGF, SHC3, PIK3CG, CDKN2A, AKT1, PRKCB, MAPK1, CCND1, IGF1, CAMK2B, CALML3, SOS2, MAPK3, PIK3R1, AKT3, CAMK2G, PIK3CB, SOS1, HRAS, PRKCA, SHC2, CALM1, GRB2, MDM2, CALML5, PIK3R5
REACTOME_PACKAGING_OF_TELOMERE_ENDS	23	0.541385	0.33301	0.754122	1.13421e-05	5.3606e-05	H2AFZ, TERF2IP, HIST2H2BE, TERF1, TERF2, POT1, ACD, H2AFX, HIST4H4, HIST1H4H, HIST1H2BI, HIST1H2BE, HIST1H2BH, HIST1H2AJ, HIST1H2BK, HIST1H2BD, HIST1H2BG, HIST2H2AA3, HIST1H4J, HIST1H2AE, HIST1H4I, HIST1H2AC, TINF2
REACTOME_CREB_PHOSPHORYLATION_THROUGH_THE_ACTIVATION_OF_CAMKII	9	0.475728	0.309021	0.645911	1.14473e-05	5.39065e-05	CALM2, ACTN2, CREB1, CAMK2B, GRIN1, AKAP9, CALM1, GRIN2C, NEFL
KEGG_RIBOFLAVIN_METABOLISM	12	-0.445857	0.632085	0.264544	1.14901e-05	5.3912e-05	ACP1, ACP2, MTMR2, RFK, ACPP, ACP5, ENPP1, FLAD1, TYR, MTMR1, MTMR6, ACP6
KEGG_BASE_EXCISION_REPAIR	31	-0.260819	0.369496	0.149863	1.32894e-05	6.21293e-05	HMGB1, POLD2, PCNA, PARP4, UNG, LIG1, POLD4, POLD1, POLB, XRCC1, MPG, TDG, LIG3, APEX2, PARP2, FEN1, OGG1, POLE2, MUTYH, PARP1, POLE3, MBD4, NTHL1, PARP3, APEX1, POLD3, POLE, SMUG1, NEIL1, NEIL3, POLL
KEGG_SYSTEMIC_LUPUS_ERYTHEMATOSUS	62	0.370075	0.206515	0.526987	1.33399e-05	6.21408e-05	H3F3B, ACTN4, H2AFZ, SSB, H2AFV, SNRPD3, SNRPD1, HIST2H2BE, C1QB, C7, C2, FCGR2A, ACTN2, FCGR3A, FCGR3B, TRIM21, CD40, H2AFX, C5, CTSG, CD86, HIST4H4, HIST1H3B, CD28, ELANE, ACTN3, TNF, HIST1H2AG, H2AFY, IL10, TROVE2, CD40LG, HIST1H4H, C4B, HIST1H2BI, HIST1H2BE, HIST1H2BH, HIST1H3C, HIST1H2AJ, ACTN1, C1S, SNRPB, HIST1H2BK, HIST1H2BD, C6, IFNG, HIST1H2BG, FCGR2B, FCGR2C, C1R, H3F3A, HIST2H2AA3, HI…
KEGG_NON_SMALL_CELL_LUNG_CANCER	46	0.298663	0.166949	0.427837	1.34449e-05	6.24056e-05	BAD, RAF1, PIK3R2, TP53, ARAF, EGFR, CDK4, MAP2K2, RXRA, NRAS, MAP2K1, PIK3R3, PLCG1, RB1, E2F3, PIK3CD, CASP9, KRAS, FOXO3, PIK3CA, PDPK1, PLCG2, TGFA, RARB, STK4, BRAF, EGF, PIK3CG, FHIT, CDKN2A, AKT1, PRKCB, MAPK1, CCND1, RXRB, ERBB2, SOS2, MAPK3, PIK3R1, AKT3, PIK3CB, SOS1, HRAS, PRKCA, GRB2, PIK3R5
REACTOME_TRNA_AMINOACYLATION	34	0.3181	0.177589	0.454895	1.41597e-05	6.54885e-05	NARS, KARS, WARS, SARS, EPRS, AARS, TARS, MARS, DARS, VARS, HARS, AIMP2, FARSA, CARS, AIMP1, LARS2, FARS2, IARS, EEF1E1, GARS, HARS2, YARS, LARS, QARS, PPA1, IARS2, CARS2, DARS2, YARS2, SARS2, WARS2, NARS2, PPA2, TARS2
BIOCARTA_HDAC_PATHWAY	23	0.291662	0.168451	0.417453	1.42116e-05	6.54949e-05	CALM2, YWHAH, PPP3CA, PPP3CB, HDAC5, MAPK14, CABIN1, MEF2D, IGF1R, PIK3CA, CAMK1, MAP2K6, PIK3CG, PPP3CC, AKT1, MAPK7, INSR, MEF2C, NFATC1, MEF2A, IGF1, PIK3R1, CALM1
BIOCARTA_FIBRINOLYSIS_PATHWAY	7	-0.885932	1.13737	0.629242	1.44772e-05	6.64823e-05	PLAT, SERPINE1, F13A1, F2R, SERPINB2, PLAU, FGG
BIOCARTA_41BB_PATHWAY	14	-0.541077	0.751462	0.334735	1.46214e-05	6.69073e-05	JUN, NFKBIA, RELA, MAPK14, MAP4K5, MAP3K5, TRAF2, ATF2, TNFRSF9, NFKB1, IKBKB, CHUK, IFNG, MAP3K1
REACTOME_NOTCH1_INTRACELLULAR_DOMAIN_REGULATES_TRANSCRIPTION	36	0.225384	0.12614	0.320593	1.56525e-05	7.13733e-05	SKP1, NCOR1, HIF1A, HDAC1, SNW1, HDAC2, TBL1X, CCNC, CREBBP, KAT2A, EP300, MAML1, MYC, HDAC5, TLE1, HES1, KAT2B, HDAC4, TLE2, CDK8, TLE4, MAMLD1, HDAC9, TLE3, HDAC6, CUL1, NCOR2, RBPJ, HDAC3, HDAC7, RBX1, FBXW7, HEY1, HEY2, HDAC11, TBL1XR1
BIOCARTA_CELL2CELL_PATHWAY	11	-0.52145	0.726689	0.313451	1.60235e-05	7.28083e-05	CTNNA1, VCL, PXN, CTNNB1, CSK, ACTN2, ACTN3, PTK2, ACTN1, PECAM1, SRC
PID_TNF_PATHWAY	43	-0.26527	0.379326	0.148824	1.65476e-05	7.49269e-05	TRADD, STAT1, SQSTM1, RELA, BIRC2, PRKCZ, FADD, TNFAIP3, CAV1, NSMAF, TNFRSF1B, MAP3K3, MAP4K5, MAP3K5, TAB1, TRAF2, MAP4K2, TRAF1, SMPD2, ADAM17, MAP4K4, MAP3K7, TNF, TNFRSF1A, MAP2K3, CASP8, TXN, NFKB1, IKBKB, SMPD1, CHUK, PRKCI, IKBKG, RIPK1, MAP2K7, MADD, TAB2, BIRC3, TNIK, CYLD, MAP3K1, MAP4K3, BAG4
PID_AVB3_OPN_PATHWAY	29	-0.463376	0.652365	0.276898	1.76084e-05	7.94125e-05	RHOA, GSN, MMP2, ILK, JUN, NFKBIA, RELA, ITGAV, ROCK2, PTK2B, MMP9, PIK3CA, CD44, ITGB3, MAP3K14, PLAU, PIP5K1A, SYK, MAPK1, RAC1, CDC42, FOS, NFKB1, CHUK, SPP1, MAPK3, PIK3R1, MAP3K1, VAV3
REACTOME_PROLONGED_ERK_ACTIVATION_EVENTS	16	-0.315348	0.453487	0.179304	1.76609e-05	7.94125e-05	RAF1, CRK, RAP1A, MAP2K2, NRAS, MAP2K1, PLCG1, CDK1, KRAS, BRAF, MAPK1, YWHAB, MAPK3, KIDINS220, HRAS, FRS2
REACTOME_RETROGRADE_NEUROTROPHIN_SIGNALLING	10	-0.840776	1.19349	0.494848	1.78709e-05	8.00788e-05	AP2B1, AP2M1, CLTC, CLTA, AP2S1, DNM2, DNAL4, SH3GL2, AP2A2, DNM1
KEGG_P53_SIGNALING_PATHWAY	57	0.218399	0.120579	0.318271	1.79543e-05	8.01753e-05	CCND2, THBS1, CCND3, TP53, RRM2, CDK4, CDKN1A, SERPINE1, CCNB2, CASP3, CCNG2, SIAH1, CDK1, DDB2, GADD45A, CD82, CASP9, PTEN, GADD45G, CDK2, PMAIP1, GTSE1, BID, PPM1D, FAS, SERPINB5, APAF1, CCNE2, CHEK1, MDM4, CDKN2A, GADD45B, CASP8, EI24, ATM, BAX, CCND1, CCNG1, CYCS, SFN, TNFRSF10B, IGF1, ATR, IGFBP3, CHEK2, TP53I3, RCHY1, CCNE1, CCNB1, TSC2, MDM2, PERP, SESN1, STEAP3, RPRM, ZMAT3, TP53AIP1
REACTOME_SYNTHESIS_OF_PA	18	0.489139	0.290059	0.680141	1.83355e-05	8.15726e-05	PLD1, LPCAT1, GNPAT, PLA2G2A, GPD1, PLA2G5, PLD2, PLA2G4A, AGPAT2, GPD1L, LPCAT4, AGPAT1, AGPAT5, AGPAT4, AGPAT3, PLA2G2D, PLA2G12A, PLA2G2F
BIOCARTA_NDKDYNAMIN_PATHWAY	16	0.342061	0.198693	0.482668	1.83932e-05	8.15726e-05	AP2M1, CALM2, NME2, NME1, PPP3CA, PPP3CB, BIN1, PICALM, AMPH, PPP3CC, SYNJ2, SYNJ1, CALM1, DNM1, EPS15, EPN1
PID_RAS_PATHWAY	23	0.286793	0.164674	0.411471	1.86375e-05	8.2374e-05	LGALS1, PRKCZ, NRAS, RASA1, KRAS, NF1, PLCE1, RIN1, RASGRP1, RASGRP3, RASA2, PRKCB, RASGRP2, LGALS3, CAMK2B, SOS2, RRAS, SOS1, HRAS, PRKCA, RABGEF1, GRB2, RASAL1
REACTOME_MRNA_3_END_PROCESSING	29	0.30577	0.170521	0.443855	1.8755e-05	8.26113e-05	SRSF9, RNPS1, SRSF11, SRSF2, SRSF7, SRRM1, NCBP2, PABPN1, SRSF4, SRSF1, CSTF1, NFX1, NUDT21, U2AF1, SRSF3, CDC40, PCF11, SRSF5, CSTF3, CLP1, CSTF2, SRSF6, DHX38, PAPOLA, NCBP1, MAGOH, RBM8A, CPSF7, UPF3B
NABA_CORE_MATRISOME	161	-0.462011	0.668394	0.251306	1.89281e-05	8.30912e-05	GAS6, SPARC, LAMC1, SPARCL1, THBS1, IGFBP7, BGN, CYR61, COL6A3, LAMB1, TGFBI, IGFBP4, TNC, HSPG2, LUM, FBLN1, AEBP1, EFEMP1, COL3A1, SRGN, DCN, NID1, VWF, LAMA4, LAMC2, MGP, COL1A1, MATN2, SPOCK1, COL1A2, PCOLCE, SPOCK2, CRIM1, FMOD, IGFBP2, LTBP1, FBN1, THBS2, FBLN5, FBN2, COL5A1, CRELD1, MFAP1, NELL2, MFAP2, IGFBP5, COL15A1, LAMA3, SLIT3, IGFBP6, FBLN2, NID2, COL7A1, ZP3, EMILIN1, PRELP, COL11A…
PID_TCR_RAS_PATHWAY	14	-0.657597	0.93166	0.387685	1.98136e-05	8.66844e-05	RAF1, NRAS, MAP2K1, ELK1, KRAS, PTPN7, MAP3K8, BRAF, PRKCB, MAPK1, FOS, MAPK3, HRAS, PRKCA
REACTOME_PURINE_CATABOLISM	7	-0.305068	0.432984	0.176341	2.04775e-05	8.92873e-05	GPX1, CAT, PNP, NT5E, NT5C2, XDH, NT5C
REACTOME_G_ALPHA_S_SIGNALLING_EVENTS	55	0.295405	0.180362	0.412856	2.05639e-05	8.93633e-05	GNB1, GNAS, GNB2, GNAI2, GNAI3, GNG10, ADM, PDE4B, ADCY7, GNB5, GNG11, PDE2A, PDE4D, ADCY9, CGA, PTGER4, RAMP1, GNAZ, ADORA2A, VIPR1, RAMP3, MC1R, PDE10A, RAMP2, ADORA2B, PTH1R, ADRB2, PTGIR, PTHLH, CALCRL, PTGER2, PDE4C, ADCY8, GNG7, HTR6, GNG5, HTR4, GLP1R, PDE1A, PDE3B, ADCY6, ADCY3, GNAI1, GNG12, PDE8A, ADCY2, PDE8B, ADCY1, LHB, P2RY11, INSL3, TSHR, PTGDR, HRH2, SCT
REACTOME_EICOSANOID_LIGAND_BINDING_RECEPTORS	9	0.383513	0.219692	0.550763	2.22365e-05	9.63088e-05	PTGER4, PTGIR, PTGER2, PTGFR, TBXA2R, LTB4R, PTGER3, PTGDR, CYSLTR2
REACTOME_HIV_INFECTION	176	0.165798	0.0889677	0.239503	2.23719e-05	9.6572e-05	PSMB2, TAF10, ARF1, TCEB2, AP2B1, AP2M1, SLC25A5, SKP1, RAN, PSMB7, XRCC6, PSME1, PSMD8, PSMD2, PSMB1, PSMD4, SSRP1, PSMF1, PSMC2, PSMA7, NMT1, PSMD1, PSMD13, PSMC4, PSMC3, PSMA5, PPIA, PSMA2, PSMD3, PSMB3, SUPT5H, SUPT4H1, NCBP2, PSMA3, RAE1, PSMA1, PSMC6, PSMD7, RANBP2, TPR, TSG101, PSME2, POLR2B, B2M, KPNA1, NUP153, AP2S1, NUP62, NUP214, TAF9, ERCC3, NUP133, NUP93, PSMB4, POLR2G, PSMD12, GTF2F…
REACTOME_ACTIVATED_AMPK_STIMULATES_FATTY_ACID_OXIDATION_IN_MUSCLE	15	0.373457	0.210809	0.538297	2.27986e-05	9.8087e-05	PRKAG1, PRKAB1, ACSL1, CPT1A, SLC25A20, CPT2, STK11, PRKAA1, CPT1B, PRKAB2, PRKAG2, CAB39, CAB39L, STRADA, ACACB
REACTOME_NA_CL_DEPENDENT_NEUROTRANSMITTER_TRANSPORTERS	8	0.370759	0.233867	0.505026	2.29635e-05	9.84691e-05	SLC6A1, SLC18A2, SLC6A6, SLC6A15, SLC6A9, SLC6A11, SLC6A2, SLC6A14
BIOCARTA_CK1_PATHWAY	15	-0.262226	0.373855	0.148261	2.35167e-05	0.000100509	PRKAR1A, PPP1CA, PPP3CA, PRKACB, PRKAR2B, CDK5, PRKAR2A, CDK5R1, PRKACG, CSNK1D, PPP2CA, GRM1, PLCB1, PRKAR1B, DRD2
REACTOME_GOLGI_ASSOCIATED_VESICLE_BIOGENESIS	41	-0.2992	0.426751	0.16993	2.41482e-05	0.000102868	ARF1, CLTC, FTH1, CLTA, RAB5C, PUM1, IGF2R, VAMP2, TPD52, CPD, SNX2, DNM2, GAK, AP3S1, VAMP8, BLOC1S1, VAMP7, PICALM, AP3B1, AP1S2, AP1G1, OCRL, TPD52L1, TGOLN2, DNAJC6, AP1S1, AP1B1, SH3GL2, NAPA, TFRC, NECAP1, HIP1R, YIPF6, FTL, SORT1, PIK3C2A, SNX5, AP1M2, ARRB1, TBC1D8B, TXNDC5
KEGG_CELL_CYCLE	110	0.322727	0.172509	0.466836	2.44107e-05	0.000103645	ANAPC5, RAD21, YWHAZ, YWHAQ, SKP1, CCND2, YWHAH, PCNA, HDAC1, BUB3, MCM3, SMC1A, CCND3, TP53, MCM5, HDAC2, CDC25B, MCM6, MCM2, ABL1, CREBBP, EP300, PLK1, CDK4, E2F4, CDKN1A, STAG1, MYC, SMAD4, CCNB2, CDC16, CDC20, CDC23, SMAD2, RB1, CDK1, ORC4, MAD2L1, CCNA2, PTTG1, TFDP2, ZBTB17, SKP2, E2F3, GADD45A, BUB1B, CDC6, CCNH, GADD45G, CDC45, TFDP1, CDKN2C, DBF4, CDK2, PKMYT1, CDC7, CDC25A, ESPL1, TTK, …
REACTOME_G_ALPHA_Q_SIGNALLING_EVENTS	89	0.222001	0.122142	0.32395	2.46159e-05	0.000104175	APP, GNB1, GNB2, ANXA1, ITPR3, PIK3R2, GNG10, RGS2, PRKCD, GNAQ, ITPR2, PIK3R3, AGT, DGKA, PLCB4, F2R, GNB5, LPAR1, PLCB2, GNG11, GNA11, EDNRB, RGS19, PIK3CA, GRK5, EDNRA, NMB, GNA15, AGTR1, HRH1, RASGRP1, BDKRB2, NMU, PRKCH, GPR4, P2RY2, PTAFR, NTS, GRP, XCL1, NPFF, F2RL1, TRPC6, TAC1, HTR2B, LPAR2, EDN2, GNG7, PMCH, LPAR4, HTR2A, GNG5, PTGFR, P2RY1, BDKRB1, DGKE, TBXA2R, GRPR, GNRH1, DGKD, TRIO…
BIOCARTA_MPR_PATHWAY	30	-0.339457	0.489897	0.192989	2.48986e-05	0.000105028	PRKAR1A, CAP1, ACTR2, GNB1, GNAS, ARPC1A, ACTR3, ARPC1B, PRKACB, PIN1, CDK1, RPS6KA1, PRKAR2B, ACTA1, PRKAR2A, CDC25C, PRKACG, ARPC2, MAPK1, ARPC3, GNAI1, ARPC4, ARPC5, MAPK3, PRKAR1B, HRAS, ADCY1, SRC, CCNB1, PAQR5
PID_INTEGRIN3_PATHWAY	38	-0.323873	0.465968	0.187548	2.51525e-05	0.000105755	HMGB1, LAMC1, THBS1, SDC1, CYR61, LAMB1, TGFBI, TNC, SDC4, LAMA4, PDGFRB, COL1A1, ITGAV, COL1A2, FBN1, KDR, PDGFB, L1CAM, ITGB3, PLAU, ITGA2B, TGFBR2, IBSP, THY1, PECAM1, SPP1, FN1, VEGFA, PLAUR, CD47, COL4A1, PVR, COL4A5, COL4A6, COL4A4, SPHK1, FGG, F11R
REACTOME_EXTRACELLULAR_MATRIX_ORGANIZATION	64	-0.482998	0.696885	0.277791	2.6042e-05	0.000109141	MMP14, P4HB, PLOD1, PPIB, MMP2, CRTAP, COL6A3, TIMP1, COL3A1, FURIN, PLOD3, COL1A1, COL1A2, PCOLCE, PLOD2, BMP1, TIMP2, COL5A1, MMP15, COL15A1, MMP9, COL7A1, MMP7, COL11A1, COL16A1, MMP1, COL17A1, COL9A3, PRSS2, CTSG, MMP10, TPSAB1, MMP3, COL10A1, MMP13, CTRB1, MMP17, KLKB1, ELANE, MMP25, SERPINH1, COL21A1, MMP16, MMP24, COL6A2, COL13A1, COL4A2, COL4A1, COL6A1, COL14A1, COL4A5, COL9A2, COL4A6, CT…
BIOCARTA_MCALPAIN_PATHWAY	24	-0.48507	0.694609	0.279565	2.62882e-05	0.000109817	CAPNS1, PRKAR1A, CAPN1, PXN, EGFR, MYLK, PRKACB, TLN1, PRKAR2B, ACTA1, PRKAR2A, EGF, PRKACG, CXCR3, PTK2, MAPK1, EZR, CAPN2, MYL2, ITGB1, MAPK3, PRKAR1B, HRAS, ITGA1
BIOCARTA_MTA3_PATHWAY	17	-0.513154	0.714478	0.309869	2.73222e-05	0.000113769	CTSD, ALDOA, CDH1, HDAC1, HSPB1, MTA1, MBD3, ESR1, PDZK1, HSPB2, TUBA4B, TUBA1A, TUBA1C, TUBA3C, TUBA4A, GAPDH, SNAI2
REACTOME_SPRY_REGULATION_OF_FGF_SIGNALING	10	-0.501994	0.70573	0.301341	2.74346e-05	0.000113871	PPP2R1A, PPP2CB, SPRY2, BRAF, MAPK1, PPP2CA, MKNK1, MAPK3, SRC, GRB2
REACTOME_DEADENYLATION_OF_MRNA	13	0.403388	0.224884	0.583261	2.80558e-05	0.000116077	EIF4A3, EIF4E, CNOT8, CNOT3, CNOT4, PARN, PAIP1, EIF4G1, EIF4B, PABPC1, CNOT2, CNOT6, CNOT7
BIOCARTA_EIF_PATHWAY	13	0.700823	0.427153	0.978171	2.88504e-05	0.000118942	EIF4G2, EEF2, EIF3A, EIF1AX, EIF2S1, EIF4E, EIF4G3, EIF1, EIF2S3, EIF5, EIF4G1, EIF2S2, EIF6
REACTOME_P53_INDEPENDENT_G1_S_DNA_DAMAGE_CHECKPOINT	45	0.275209	0.149387	0.402729	2.89318e-05	0.000118942	PSMB2, PSMB7, PSME1, PSMD8, PSMD2, PSMB1, PSMD4, PSMF1, PSMC2, PSMA7, PSMD1, PSMD13, PSMC4, PSMC3, PSMA5, PSMA2, PSMD3, PSMB3, PSMA3, PSMA1, PSMC6, PSMD7, PSME2, PSMB4, PSMD12, PSMB10, PSMA6, PSMD6, PSMA4, PSMD5, PSMC1, PSMB9, CDC25A, CHEK1, PSMD9, ATM, PSMD11, PSMB5, PSMB6, PSMB8, PSMC5, CHEK2, PSME4, PSMD14, PSMD10
PID_SYNDECAN_4_PATHWAY	28	-0.462593	0.667128	0.266363	2.99714e-05	0.000122826	CCL5, RHOA, SDCBP, THBS1, ITGA5, TNC, SDC4, DNM2, PRKCD, ADAM12, CXCL12, FZD7, LAMA3, MMP9, FGF2, GIPC1, TNFRSF13B, PTK2, FGFR1, FGF6, ACTN1, RAC1, MDK, CXCR4, TFPI, FN1, ITGB1, PRKCA
PID_CIRCADIAN_PATHWAY	13	-0.54713	0.763626	0.32611	3.06712e-05	0.000125297	NONO, BHLHE40, CSNK1E, PER1, TIMELESS, CLOCK, PER2, CHEK1, NPAS2, CRY1, ARNTL, ATR, CRY2
BIOCARTA_UCALPAIN_PATHWAY	17	-0.591544	0.837546	0.342235	3.24562e-05	0.000132172	CAPNS1, RHOA, CAPN1, PXN, TLN1, ACTN2, ACTA1, ITGB3, ACTN3, PTK2, SPTAN1, EZR, ACTN1, RAC1, ITGB1, SRC, ITGA1
REACTOME_TRAFFICKING_OF_AMPA_RECEPTORS	17	0.31678	0.174756	0.461779	3.32629e-05	0.000135033	AP2B1, AP2M1, AP2S1, NSF, DLG1, MYO6, PICK1, GRIA2, PRKCB, GRIA1, CAMK2B, AP2A2, EPB41L1, PRKCA, GRIP2, MDM2, CACNG4
REACTOME_ADP_SIGNALLING_THROUGH_P2RY1	16	-0.427627	0.614118	0.2487	3.36225e-05	0.000136066	GNB1, GNB2, GNG10, MAPK14, GNAQ, GNB5, GNG11, GNA11, GNA15, GNG7, GNG5, P2RY1, PLA2G4A, GNG12, SRC, GNA14
BIOCARTA_ARENRF2_PATHWAY	12	-0.675883	0.958614	0.398586	3.51206e-05	0.000141686	JUN, KEAP1, MAPK14, CREB1, MAFG, MAFF, FXYD2, MAFK, PRKCB, MAPK1, FOS, PRKCA
REACTOME_INSULIN_RECEPTOR_SIGNALLING_CASCADE	64	0.211209	0.119368	0.299319	3.65719e-05	0.000147083	RPS6, RAF1, PIK3R2, EIF4E, RHEB, SHC1, PRKAG1, PRKAB1, CRK, MAP2K2, NRAS, MAP2K1, CDK1, FGFR2, PPM1A, KRAS, RPS6KB1, STK11, PIK3C3, PIK3CA, FGFR3, FGF2, PDPK1, FGFR4, IRS1, FGF1, FGF7, KL, SHC3, FGF18, GAB1, FGFR1, INSR, MAPK1, FGF6, PDE3B, EIF4G1, YWHAB, IRS2, TSC1, GRB10, PRKAA1, FGF5, DOK1, EIF4B, MAPK3, PIK3R1, PIK3CB, PIK3R4, SOS1, HRAS, SHC2, PRKAB2, GRB2, PRKAG2, TSC2, CAB39, TRIB3, MLST8,…
BIOCARTA_CDC42RAC_PATHWAY	16	0.571523	0.327387	0.809221	3.90541e-05	0.000156579	RHOA, ACTR2, ARPC1A, ACTR3, ARPC1B, PDGFRA, PIK3CA, WASL, ARPC2, RAC1, CDC42, ARPC3, PAK1, ARPC4, ARPC5, PIK3R1
KEGG_SPHINGOLIPID_METABOLISM	24	-0.29236	0.43071	0.159632	4.02167e-05	0.000160743	GLB1, SPTLC1, KDSR, SPTLC2, GALC, ARSA, UGCG, SMPD2, B4GALT6, DEGS1, SMPD4, SGPL1, NEU1, GBA, SMPD1, ASAH1, SGMS1, GLA, NEU3, CERK, SPHK1, SMPD3, SGPP1, SPHK2
BIOCARTA_EPONFKB_PATHWAY	11	0.313703	0.180142	0.450056	4.20418e-05	0.000167521	HIF1A, NFKBIA, RELA, CDKN1A, JAK2, NFKB1, EPOR, GRIN1, ARNT, SOD2, EPO
BIOCARTA_AMI_PATHWAY	11	-0.612973	0.830254	0.391149	4.30642e-05	0.000171068	PLAT, F2R, F10, PROS1, TFPI, COL4A2, COL4A1, COL4A5, COL4A6, COL4A4, FGG
PID_NEPHRIN_NEPH1_PATHWAY	26	0.269505	0.146381	0.387624	4.40448e-05	0.000174428	BAD, PIK3R2, JUN, TJP1, PRKCZ, PIK3R3, PLCG1, MAPK9, MAP2K4, NCK2, ARRB2, CD2AP, PIK3CD, PIK3CA, NCK1, MAPK10, WASL, TRPC6, AKT1, RAC1, PRKCI, FYN, PIK3R1, PIK3CB, GRB2, KIRREL
KEGG_FATTY_ACID_METABOLISM	36	-0.400789	0.585677	0.223415	4.42881e-05	0.00017466	ACADVL, HADHB, HADH, ECHS1, ALDH2, ALDH9A1, ACSL3, ACSL1, ACAA2, ACAA1, ALDH3A2, ACADS, ACSL4, ACADM, GCDH, CPT1A, ACOX3, CPT2, EHHADH, ACADSB, ACAT1, ACADL, ADH1A, HADHA, ADH5, ALDH7A1, ACOX1, ACAT2, ADH1B, ALDH1B1, ECI1, CPT1B, ADH7, ADH6, ECI2, ACSL5
REACTOME_AMINE_DERIVED_HORMONES	7	1.05271	0.755282	1.35631	4.4373e-05	0.00017466	DIO2, CGA, DDC, PNMT, DIO3, SLC5A5, TPH1
PID_TGFBR_PATHWAY	49	0.297657	0.159368	0.438847	4.56058e-05	0.000178968	RHOA, SPTBN1, FKBP1A, PPP1CA, STRAP, DAB2, PPP2CB, SHC1, CTNNB1, DAXX, PPP1R15A, PPP2R2A, SMAD4, CAV1, SMAD2, BAMBI, ARRB2, ZFYVE16, TAB1, RPS6KB1, PDPK1, TGFBR3, SMAD7, ZFYVE9, TGFBRAP1, SMAD3, SMURF2, PML, SKIL, MAP3K7, TGFBR1, TGFBR2, PPP2CA, CTGF, ITCH, TGFB3, TGFB2, OCLN, TAB2, YWHAE, NEDD4L, WWP1, SMURF1, SOS1, AXIN1, YAP1, GRB2, DYNLRB1, RNF111
BIOCARTA_CREB_PATHWAY	25	-0.361073	0.522018	0.198555	4.60676e-05	0.000180234	PRKAR1A, GNAS, MAPK14, PRKACB, RPS6KA1, PRKAR2B, CREB1, PIK3CA, RPS6KA5, PRKAR2A, AKT1, PRKACG, PRKCB, MAPK1, RAC1, CAMK2B, MAPK3, PIK3R1, PRKAR1B, CAMK2G, SOS1, HRAS, PRKCA, ADCY1, GRB2
REACTOME_TRANSPORT_OF_MATURE_MRNA_DERIVED_FROM_AN_INTRONLESS_TRANSCRIPT	27	0.295439	0.165629	0.427969	4.81049e-05	0.000187638	EIF4E, NCBP2, RAE1, RANBP2, TPR, NUP153, NUP62, NUP214, NUP133, NUP93, NUP88, NUPL2, POM121, NUP155, NXF1, NCBP1, NUP205, NUP210, NUP188, NUP50, NUP85, AAAS, NUP54, NUP37, NUP107, NUP43, SEH1L
BIOCARTA_DNAFRAGMENT_PATHWAY	10	0.727986	0.49584	0.950725	4.84826e-05	0.000188543	HMGB1, TOP2A, CASP3, DFFA, ENDOG, DFFB, CASP7, HMGB2, GZMB, TOP2B
REACTOME_ENDOSOMAL_SORTING_COMPLEX_REQUIRED_FOR_TRANSPORT_ESCRT	16	-0.285129	0.415584	0.158116	5.03738e-05	0.000195311	TSG101, CHMP2A, CHMP2B, STAM, STAM2, HGS, CHMP7, CHMP3, VPS4A, CHMP5, VPS4B, SNF8, VPS28, CHMP6, VPS37C, VPS37B
KEGG_SULFUR_METABOLISM	9	-0.450575	0.652101	0.247506	5.26535e-05	0.000203541	PAPSS2, SULT1A1, SUOX, SULT2B1, SULT1A2, PAPSS1, CHST12, CHST11, SULT1E1
BIOCARTA_P53_PATHWAY	15	0.4321	0.233292	0.635072	5.38879e-05	0.000207693	TIMP3, PCNA, TP53, CDK4, CDKN1A, RB1, BCL2, GADD45A, CDK2, APAF1, ATM, BAX, CCND1, CCNE1, MDM2
BIOCARTA_MTOR_PATHWAY	20	0.267848	0.142409	0.391384	5.42615e-05	0.000208	EIF4G2, RPS6, EIF3A, FKBP1A, EIF4E, EIF4G3, PDK2, PTEN, RPS6KB1, PIK3CA, PDPK1, AKT1, EIF4G1, PPP2CA, TSC1, MKNK1, EIF4B, PIK3R1, TSC2, EIF4EBP1
KEGG_ALANINE_ASPARTATE_AND_GLUTAMATE_METABOLISM	26	0.270495	0.141686	0.396819	5.42887e-05	0.000208	GLUL, GOT2, GLUD1, ADSL, CAD, GFPT1, GLS, ALDH5A1, ALDH4A1, ASL, CPS1, ASNS, GFPT2, GLS2, ASPA, GPT, GAD2, ASS1, GOT1, PPAT, ABAT, AGXT, GLUD2, NIT2, ADSS, DDO
REACTOME_ACTIVATION_OF_BH3_ONLY_PROTEINS	11	0.435472	0.239355	0.635693	5.97094e-05	0.000228093	BAD, DYNLL1, TP53, BCL2, TFDP1, PMAIP1, BID, PPP3R1, AKT1, YWHAB, BCL2L11
PID_TOLL_ENDOGENOUS_PATHWAY	21	0.507845	0.27751	0.741281	6.05565e-05	0.000230649	RHOA, HMGB1, HSPD1, BGN, IRAK1, CD14, S100A8, S100A9, VCAN, TLR2, TLR3, LY96, MYD88, IKBKB, CHUK, IKBKG, TLR1, TICAM1, SAA1, IRAK4, TLR4
REACTOME_NONSENSE_MEDIATED_DECAY_ENHANCED_BY_THE_EXON_JUNCTION_COMPLEX	81	0.201516	0.105357	0.299691	6.10086e-05	0.000231689	RPL35, RPL28, RPL11, RPL24, FAU, RPL18, RPS5, RPL34, RPL19, RPL9, RPL6, RPL10A, RNPS1, RPS24, RPL14, RPS6, RPS7, RPL12, RPS25, RPS3A, PPP2R1A, RPL7, RPL10, RPS27, RPLP1, RPS10, RPS15, RPL29, RPS21, RPL18A, RPL23, RPLP2, RPL8, RPS20, RPL31, RPLP0, RPS18, RPS16, EIF4A3, RPL36A, RPL41, NCBP2, ETF1, RPS17, SMG7, RPS4Y1, RPL38, PPP2R2A, RPS19, RPS2, UPF2, GSPT2, UPF3A, CASC3, EIF4G1, RPS14, PPP2CA, RP…
BIOCARTA_CARM1_PATHWAY	13	-0.28949	0.425253	0.155041	6.33413e-05	0.000239845	PRKAR1A, CREBBP, EP300, RXRA, PRKACB, PRKAR2B, RARA, CREB1, PRKAR2A, PRKACG, NCOA3, CARM1, PRKAR1B
BIOCARTA_IGF1R_PATHWAY	23	-0.351078	0.510875	0.192827	6.46793e-05	0.000244197	BAD, PRKAR1A, YWHAH, RAF1, SHC1, MAP2K1, PRKACB, RPS6KA1, IGF1R, PRKAR2B, PIK3CA, IRS1, PRKAR2A, AKT1, PRKACG, MAPK1, MAPK3, PIK3R1, PRKAR1B, SOS1, HRAS, ADCY1, GRB2
PID_PI3KCI_PATHWAY	48	-0.264176	0.395195	0.13848	6.50058e-05	0.000244717	RHOA, ARF1, PIK3R2, ARF5, INPPL1, SGK1, RAP1A, LYN, NRAS, PIK3R3, PLCG1, CYTH1, YES1, ARF6, INPP5D, PIK3CD, KRAS, PTEN, FOXO3, PIK3CA, PDPK1, PLCG2, LCK, BTK, BLK, PIK3CG, CYTH3, SYK, BLNK, HCK, FGR, RAC1, CYTH2, LAT, FYN, HSP90AA1, ITK, PIK3R1, PIK3CB, HRAS, SRC, ZAP70, PLEKHA2, ARAP3, PLEKHA1, ADAP1, DAPP1, PIK3R5
REACTOME_SYNTHESIS_AND_INTERCONVERSION_OF_NUCLEOTIDE_DI_AND_TRIPHOSPHATES	15	0.224211	0.119672	0.329772	7.07206e-05	0.000265458	GUK1, TXNRD1, NME2, RRM1, NME1, RRM2, AK1, DTYMK, GSR, AK2, GLRX, TXN, NME4, CMPK1, CTPS2
REACTOME_FGFR2C_LIGAND_BINDING_AND_ACTIVATION	6	1.82548	1.23607	2.39113	7.15631e-05	0.000267845	FGFR2, FGF2, FGF1, FGF18, FGF6, FGF5
REACTOME_RESPIRATORY_ELECTRON_TRANSPORT	57	-0.373692	0.553374	0.190238	7.39522e-05	0.000275989	COX4I1, UQCRC2, COX6A1, CYC1, SDHA, COX8A, COX7C, NDUFB8, COX7A2L, NDUFA5, COX6B1, UQCRQ, NDUFS3, COX6C, NDUFS5, UQCRC1, ETFA, NDUFS2, NDUFA6, SDHC, SDHD, NDUFAB1, UQCR11, COX7B, UQCRH, NDUFA1, COX5B, SDHB, NDUFA7, NDUFB7, NDUFV2, ETFB, NDUFS1, NDUFB3, NDUFC1, NDUFS6, NDUFB6, NDUFB5, COX5A, ETFDH, UQCRB, NDUFB1, NDUFV1, CYCS, UQCRFS1, NDUFA9, NDUFA2, NDUFS4, NDUFS7, NDUFA4, NDUFA10, NDUFC2, NDUFA…
REACTOME_FORMATION_OF_THE_HIV1_EARLY_ELONGATION_COMPLEX	27	0.316911	0.170886	0.461523	7.43902e-05	0.000276826	SUPT5H, SUPT4H1, NCBP2, POLR2B, ERCC3, POLR2G, GTF2F1, GTF2H1, POLR2L, POLR2K, POLR2A, MNAT1, GTF2H4, POLR2D, CCNH, CTDP1, POLR2C, POLR2H, POLR2F, NCBP1, GTF2F2, CDK7, POLR2J, POLR2I, POLR2E, GTF2H2B, GTF2H3
REACTOME_G1_PHASE	30	0.183386	0.0953781	0.267818	7.67447e-05	0.000284769	PPP2R1A, SKP1, CCND2, PPP2CB, CCND3, CKS1B, CDK4, E2F4, CDKN1A, PPP2R2A, PPP2R1B, RB1, MNAT1, SKP2, E2F3, CCNH, TFDP1, CDKN2C, RBL1, CDKN2A, CDKN2B, CUL1, PPP2CA, CCND1, CDKN1B, CDKN2D, CDK7, RBL2, PPP2R3B, E2F5
REACTOME_GLUCOSE_TRANSPORT	30	0.251582	0.133082	0.365268	7.94401e-05	0.000293928	HK1, SLC2A1, RAE1, RANBP2, TPR, NUP153, NUP62, NUP214, NUP133, NUP93, SLC2A3, SLC37A4, NUP88, HK2, NUPL2, POM121, NUP155, G6PC, NUP205, NUP210, NUP188, NUP50, NUP85, AAAS, NUP54, NUP37, NUP107, NUP43, G6PC3, SEH1L
KEGG_ABC_TRANSPORTERS	29	0.460493	0.277618	0.647194	8.06301e-05	0.000297481	TAP1, ABCC1, ABCD3, ABCB6, ABCC4, ABCA1, ABCD4, ABCA3, ABCG1, ABCA8, TAP2, CFTR, ABCD1, ABCB9, ABCG4, ABCB4, ABCC3, ABCC9, ABCC5, ABCB7, ABCG2, ABCB1, ABCA4, ABCA2, ABCA5, ABCC10, ABCA12, ABCA6, ABCA7
REACTOME_ACTIVATED_POINT_MUTANTS_OF_FGFR2	8	1.29454	0.862394	1.70925	8.32547e-05	0.000306292	FGFR2, FGF2, FGF1, FGF7, FGF18, FGF6, FGF5, FGF22
BIOCARTA_SODD_PATHWAY	10	-0.519822	0.740485	0.308095	8.47037e-05	0.00031074	TRADD, FADD, TNFRSF1B, TRAF2, TNF, TNFRSF1A, CASP8, RIPK1, BIRC3, BAG4
KEGG_PROGESTERONE_MEDIATED_OOCYTE_MATURATION	67	0.195824	0.100138	0.293515	8.53549e-05	0.000312245	HSP90AB1, ANAPC5, GNAI2, GNAI3, RAF1, PIK3R2, CDC25B, ARAF, PLK1, MAPK14, MAP2K1, CCNB2, CDC16, PRKACB, PIK3R3, PRKACA, CDC23, CDK1, MAPK9, MAD2L1, RPS6KA1, CCNA2, IGF1R, ADCY7, RPS6KA3, PIK3CD, KRAS, PRKX, CDK2, PKMYT1, PIK3CA, ADCY9, CDC25A, MAPK10, RPS6KA2, CDC25C, CCNA1, BRAF, PIK3CG, ADCY8, AKT1, PRKACG, ANAPC10, MAPK1, PDE3B, ANAPC13, ADCY6, ADCY3, FZR1, IGF1, GNAI1, BUB1, MAPK13, HSP90AA1,…
SA_FAS_SIGNALING	9	0.310163	0.174282	0.448883	8.60729e-05	0.000313984	CFL1, CASP3, BCL2, PDE6D, FAS, ENDOU, CASP8, CFLAR, FASLG
PID_FAK_PATHWAY	54	-0.246498	0.369583	0.126668	8.74428e-05	0.000318086	PTPN21, MMP14, RHOA, RAP1B, VCL, PXN, ITGB5, RAF1, ITGA5, JUN, SH3GL1, ARHGAP35, CRK, ITGAV, RAP1A, ARHGEF7, MAP2K1, RASA1, ROCK2, PLCG1, ARHGEF11, YES1, DOCK1, MAPK9, TLN1, MAP2K4, NCK2, ACTA1, PIK3CA, ELMO1, NCK1, GIT2, ARHGAP26, WASL, BRAF, BMX, PTK2, MAPK1, ACTN1, RAC1, CAPN2, CCND1, PAK1, FYN, GRB7, ITGB1, PIK3R1, RRAS, SOS1, MAPK8IP3, SRC, GRB2, KLF8, ASAP1
REACTOME_GABA_B_RECEPTOR_ACTIVATION	23	0.320086	0.171552	0.471733	8.94957e-05	0.000324641	GNB1, GNB2, GNAI2, GNAI3, GNG10, GABBR1, ADCY7, ADCY9, GNAL, KCNJ2, ADCY8, GNG7, GNG5, KCNJ5, ADCY6, ADCY3, GNAI1, GABBR2, KCNJ15, GNG12, ADCY2, ADCY1, KCNJ16
REACTOME_DNA_REPLICATION	165	0.249925	0.126164	0.376282	9.05256e-05	0.00032746	RFC2, PSMB2, RAD21, PPP2R1A, MAPRE1, PPP1CC, RPS27, PSMB7, PAFAH1B1, PSME1, PSMD8, PSMD2, PSMB1, PSMD4, PSMF1, PSMC2, PSMA7, POLD2, NUDC, PSMD1, PCNA, PSMD13, PSMC4, PSMC3, PSMA5, PSMA2, PPP2CB, PSMD3, PSMB3, BUB3, RPA1, PSMA3, MCM3, SMC1A, PSMA1, PSMC6, PSMD7, RANBP2, MCM5, RPA2, PSME2, PPP2R5C, MCM6, CLIP1, BIRC5, MCM2, NUP133, PPP2R5A, PLK1, PSMB4, CDKN1A, STAG1, PMF1, PSMD12, PPP2R5D, PSMB10,…
ST_ADRENERGIC	31	0.280844	0.146794	0.417702	9.08871e-05	0.000327653	ITPR3, RAF1, EGFR, CFB, MAPK14, GNAQ, ITPR2, APC, ITPR1, ITPKB, PIK3CD, GNA11, PIK3CA, MAPK10, GNA15, DAG1, ITPKA, BRAF, PTX3, CCL13, AKT1, PITX2, MAPK1, KCNJ5, PHKA2, GNAI1, CAMP, ASAH1, AR, PIK3R1, SRC
REACTOME_PRE_NOTCH_TRANSCRIPTION_AND_TRANSLATION	17	0.209027	0.109035	0.309785	9.10849e-05	0.000327653	JUN, SNW1, TP53, CREBBP, KAT2A, EP300, MAML1, NOTCH2, NOTCH3, E2F3, KAT2B, TFDP1, MAMLD1, NOTCH4, RBPJ, CCND1, TNRC6B
REACTOME_BRANCHED_CHAIN_AMINO_ACID_CATABOLISM	16	-0.666363	0.982993	0.355828	9.28383e-05	0.000333035	HSD17B10, BCKDHA, BCAT2, IVD, HIBCH, ALDH6A1, AUH, ACADSB, DBT, ACAT1, DLD, MCCC2, BCKDHB, BCAT1, MCCC1, ACAD8
SA_REG_CASCADE_OF_CYCLIN_EXPR	11	0.54505	0.29234	0.803046	9.59282e-05	0.000343169	CDK4, E2F4, CCNA2, CDK2, CCNE2, CCNA1, CDKN2A, PRB1, CCND1, CDKN1B, CCNE1
PID_MET_PATHWAY	64	-0.335464	0.505731	0.172121	9.67666e-05	0.000345214	BAD, RHOA, CTNNA1, RAP1B, PXN, CDH1, RAF1, EIF4E, JUN, SHC1, CTNNB1, INPPL1, EGR1, PRKCZ, CRK, RAP1A, MAP2K2, RANBP9, MAP2K1, PTPN1, PLCG1, PAK4, MAP2K4, ARF6, NCK2, INPP5D, MET, APC, GAB2, PIK3CA, PDPK1, NCK1, PTPN2, ARHGEF4, SH3GL2, WASL, PTPN11, RAB5A, CRKL, GAB1, AKT1, PTK2, MAPK1, RAC1, CDC42, PAK2, KPNB1, PAK1, PRKCI, RIN2, HGF, HGS, MAPK3, PIK3R1, SOS1, HRAS, SRC, MAP3K1, GRB2, EPS15, DEPT…
REACTOME_METABOLISM_OF_RNA	210	0.138674	0.0685681	0.205932	9.78038e-05	0.000347956	RPL35, RPL28, RPL11, RPL24, FAU, RPL18, RPS5, RPL34, RPL19, RPL9, RPL6, RPL10A, PSMB2, RNPS1, RPS24, HNRNPD, RPL14, RPS6, RPS7, RPL12, RPS25, RPS3A, YWHAZ, PPP2R1A, RPL7, RPL10, RPS27, RPLP1, PSMB7, HSPA1B, PSME1, RPS10, RPS15, PSMD8, RPL29, SNRPD2, PSMD2, RPS21, RPL18A, PSMB1, PSMD4, RPL23, RPLP2, RPL8, RPS20, RPL31, RPLP0, ANP32A, RPS18, PSMF1, PSMC2, PSMA7, PSMD1, PSMD13, PSMC4, RPS16, PSMC3, …
PID_P73PATHWAY	67	0.279634	0.15616	0.405695	0.00010224	0.000361214	PEA15, FLOT2, BUB3, JAK1, RELA, NDUFS2, ABL1, EP300, PLK1, CDKN1A, UBE4B, HSF1, MYC, DEDD, MAPK14, SERPINE1, PRKACB, SERPINA1, PIN1, BIN1, RB1, CDK1, IL4R, CCNA2, BAK1, FOXO3, CDK2, S100A2, ADA, FAS, PLK3, HAGH, RAD51, CCNE2, IL1RAP, CHEK1, WT1, CLCA2, PML, KAT5, PFDN5, TP63, BRCA2, BAX, TUBA1A, SFN, BUB1, ITCH, JAG2, TP53I3, WWOX, MAPK11, FASN, NEDD4L, RCHY1, GRAMD4, YAP1, CCNB1, SP1, MDM2, RNF4…
REACTOME_DOWNREGULATION_OF_ERBB2_ERBB3_SIGNALING	8	0.378447	0.218192	0.53628	0.000102248	0.000361214	RNF41, ERBB3, USP8, NRG1, NRG2, AKT1, ERBB2, AKT3
KEGG_AUTOIMMUNE_THYROID_DISEASE	13	1.15939	0.708143	1.62006	0.000102367	0.000361214	TG, CGA, FAS, CD40, CD86, CD28, IL10, CD40LG, GZMB, FASLG, PRF1, TSHR, CTLA4
REACTOME_CELL_JUNCTION_ORGANIZATION	51	-0.472407	0.701542	0.238469	0.000104522	0.000367814	CTNNA1, JUP, CDH1, ILK, PLEC, CLDN4, CTNNB1, RSU1, VASP, LAMC2, CLDN7, CDH3, CDH2, LAMA3, CLDN3, TESK1, CD151, CLDN5, PARVB, COL17A1, CDH5, CDH13, ITGB4, CLDN10, CDH6, CDH12, CDH11, LIMS1, FLNC, CTNND1, ACTN1, CADM1, FERMT2, LAMB3, ARHGEF6, PRKCI, PARD3, ITGB1, PVR, LIMS3, PARVA, CLDN8, CLDN1, CLDN22, MPP5, CLDN15, CDH10, CDH4, CLDN18, CLDN17, F11R
REACTOME_NFKB_ACTIVATION_THROUGH_FADD_RIP1_PATHWAY_MEDIATED_BY_CASPASE_8_AND10	11	0.313473	0.164286	0.465783	0.000107376	0.000376835	FADD, CASP10, TRIM25, CASP8, IKBKB, CHUK, IKBKG, RIPK1, IFIH1, DDX58, MAVS
PID_IL5_PATHWAY	12	0.416077	0.226163	0.598287	0.000107739	0.000377086	SDCBP, LYN, STAT5A, PIK3CA, STAT5B, CSF2RB, JAK2, PTPN11, PIM1, PIK3R1, GRB2, CISH
REACTOME_TCA_CYCLE_AND_RESPIRATORY_ELECTRON_TRANSPORT	104	-0.279944	0.424511	0.141256	0.000114261	0.000398836	COX4I1, LDHA, ACO2, ATP5O, UQCRC2, COX6A1, PDHA1, LDHB, CYC1, SDHA, COX8A, COX7C, IDH1, NDUFB8, COX7A2L, OGDH, NDUFA5, ATP5B, COX6B1, IDH3B, UQCRQ, NDUFS3, COX6C, NDUFS5, UQCRC1, ETFA, NDUFS2, NDUFA6, SDHC, SDHD, IDH3A, NDUFAB1, UQCR11, COX7B, UQCRH, SLC16A1, NDUFA1, ATP5J, COX5B, IDH3G, PDK2, SDHB, NNT, NDUFA7, NDUFB7, SLC16A3, SUCLA2, NDUFV2, ETFB, ATP5J2, FH, NDUFS1, PDHX, NDUFB3, NDUFC1, NDUF…
REACTOME_TRAFFICKING_OF_GLUR2_CONTAINING_AMPA_RECEPTORS	11	-0.487317	0.72088	0.248862	0.000122646	0.000426953	AP2B1, AP2M1, AP2S1, NSF, PICK1, GRIA2, PRKCB, GRIA1, AP2A2, PRKCA, GRIP2
ST_GAQ_PATHWAY	25	0.315129	0.163995	0.469425	0.000126492	0.00043916	PLD1, PLD3, ITPR3, NFKBIA, CFB, GNAQ, ITPR2, ITPR1, ITPKB, NFKBIE, PDPK1, DAG1, ITPKA, TONSL, AKT1, NFKB2, PITX2, NFKB1, PHKA2, PLD2, IKBKG, NFKBIL1, AKT3, PIK3CB, NFKBIB
REACTOME_CHROMOSOME_MAINTENANCE	82	0.251098	0.123228	0.373768	0.000133628	0.000462695	RFC2, RAD21, H2AFZ, RBBP7, POLD2, TERF2IP, PCNA, RUVBL2, RPA1, SMC1A, RUVBL1, RPA2, STAG1, SMARCA5, HIST2H2BE, LIG1, SYNE2, POLD4, RFC5, LMNB1, LMNA, POLD1, TERF1, TERF2, RFC4, RFC3, POT1, POLA2, BRCA1, ACD, FEN1, POLA1, CENPA, PRIM1, ITGB3BP, H2AFX, PRIM2, POLE2, HIST4H4, MIS18BP1, SYCP2, SYCP1, STAG2, HIST1H4H, HIST1H2BI, HIST1H2BE, HIST1H2BH, HIST1H2AJ, UBE2I, NHP2, SMC3, SYNE1, RPA3, HIST1H2B…
KEGG_GAP_JUNCTION	74	-0.185681	0.283049	0.09227	0.00014111	0.0004873	GNAS, GNAI2, TUBA1B, GNAI3, ITPR3, RAF1, GJA1, EGFR, TJP1, TUBB3, PDGFRB, MAP2K2, GNAQ, NRAS, ITPR2, MAP2K1, PRKACB, PRKACA, PDGFRA, CDK1, ITPR1, ADCY7, GUCY1B3, PLCB4, KRAS, LPAR1, PLCB2, PRKX, TUBB2A, PDGFB, GNA11, ADCY9, MAP2K5, PDGFA, EGF, HTR2B, ADCY8, HTR2A, PRKACG, MAPK7, PRKG2, CSNK1D, PRKCB, MAPK1, TUBB4B, TUBB, TUBA1A, TUBB6, ADCY6, TUBA1C, ADCY3, GNAI1, TUBA3C, GRM1, SOS2, TUBB7P, PLCB…
SA_PTEN_PATHWAY	15	0.513656	0.269046	0.763386	0.000143013	0.000492557	ILK, SHC1, PTK2B, PIK3CD, PTEN, PIK3CA, PDPK1, AKT1, MAPK1, MAPK3, RBL2, AKT3, SOS1, IPCEF1, GRB2
REACTOME_INTRINSIC_PATHWAY_FOR_APOPTOSIS	23	0.423032	0.249048	0.600658	0.000143912	0.000493549	BAD, DYNLL1, NMT1, TP53, CASP3, BCL2, BAK1, CASP9, TFDP1, PMAIP1, BID, PPP3R1, APAF1, BCL2L1, AKT1, CASP7, CASP8, BAX, YWHAB, CYCS, GZMB, DIABLO, BCL2L11
REACTOME_METABOLISM_OF_STEROID_HORMONES_AND_VITAMINS_A_AND_D	20	0.752588	0.418126	1.07351	0.000144063	0.000493549	LGMN, AKR1B1, CYP19A1, HSD3B1, STAR, CGA, SRD5A1, HSD11B1, CYP27B1, HSD17B1, CYP24A1, SRD5A2, CYP2R1, STARD5, LHB, CYP21A2, CYP11B2, RDH11, SRD5A3, LRAT
REACTOME_ASSOCIATION_OF_TRIC_CCT_WITH_TARGET_PROTEINS_DURING_BIOSYNTHESIS	19	0.291535	0.146247	0.433842	0.000146458	0.000500431	CCT7, CCT8, CCT4, CCT3, CCT6A, CCT2, CCT5, USP11, TCP1, FBXL5, FBXW2, KIFC3, FKBP9, ARFGEF2, FBXW7, SPHK1, KIF13A, FBXW4, LONP2
PID_FCER1_PATHWAY	55	-0.380484	0.571278	0.185687	0.000155216	0.000528961	DUSP1, PXN, RAF1, JUN, SHC1, RELA, MAP2K2, LYN, WIPF1, MAP2K1, RASA1, PLCG1, HCLS1, MAP2K4, INPP5D, GAB2, PTPN13, FCER1G, PIK3CA, S1PR1, LCP2, BTK, PTPN11, VAV1, FER, AKT1, MS4A2, SYK, PTK2, PRKCB, MAPK1, PAK2, FOS, NFKB1, IKBKB, PLD2, CHUK, CBLB, LAT, IKBKG, MAP2K7, FYN, PLA2G4A, FCGR2B, DOK1, ITK, FCER1A, LAT2, MAPK3, PIK3R1, SOS1, HRAS, MAP3K1, GRB2, SPHK1
KEGG_TRYPTOPHAN_METABOLISM	29	0.278457	0.15026	0.409337	0.000156584	0.000532221	WARS, HADH, ECHS1, OGDH, ALDH2, CAT, ALDH9A1, ALDH3A2, CYP1B1, GCDH, MAOB, KYNU, MAOA, AOX1, EHHADH, KMO, DDC, ACAT1, HAAO, CYP1A1, TDO2, CYP1A2, HADHA, ALDH7A1, ACAT2, ALDH1B1, IDO1, TPH1, WARS2
ST_T_CELL_SIGNAL_TRANSDUCTION	40	0.384116	0.189938	0.570405	0.000159554	0.000540898	RAF1, NFKBIA, CSK, PLCG1, PAK4, DTYMK, ITPKB, NFKBIE, NCK1, LCK, LCP2, DAG1, RASGRP1, RASGRP3, ITPKA, VAV1, CD28, TONSL, PTPRC, NFKB2, NFAT5, RASGRP2, MAPK1, PAK2, NFKB1, EPHB2, PAK1, LAT, NFKBIL1, ITK, SOS2, SOS1, CD3D, ZAP70, NFKBIB, PAK3, GRB2, FBXW7, PAK6, CTLA4
BIOCARTA_HIVNEF_PATHWAY	53	-0.258751	0.388579	0.1262	0.000160831	0.000543803	TRADD, GSN, NUMA1, ARHGDIB, NFKBIA, DAXX, RELA, BIRC2, FADD, PRKCD, RASA1, CASP3, RB1, LMNB1, DFFA, LMNA, PSEN1, TNFRSF1B, BCL2, MAP3K5, CASP9, PSEN2, TRAF2, BID, FAS, APAF1, MAP3K14, TRAF1, DFFB, TNF, CASP7, CDK11B, TNFRSF1A, CASP8, PTK2, CFLAR, SPTAN1, PARP1, PRKDC, PAK2, CYCS, NFKB1, CHUK, CASP6, CRADD, RIPK1, MAP2K7, BIRC3, FASLG, MAP3K1, LMNB2, MDM2, BAG4
REACTOME_PROSTANOID_LIGAND_RECEPTORS	7	0.467599	0.238308	0.692193	0.000164219	0.00055381	PTGER4, PTGIR, PTGER2, PTGFR, TBXA2R, PTGER3, PTGDR
REACTOME_INTERACTION_BETWEEN_L1_AND_ANKYRINS	14	0.47152	0.239318	0.694306	0.000172489	0.000580189	SPTBN1, NRCAM, L1CAM, SCN3B, SPTBN2, ANK1, SCN1B, ANK3, SCN4A, SCN8A, SCN5A, SPTAN1, SPTB, SPTBN5
REACTOME_FGFR_LIGAND_BINDING_AND_ACTIVATION	12	0.744125	0.460625	1.01617	0.000173463	0.000581954	FGFR2, FGFR3, FGF2, FGFR4, FGF1, FGF7, KL, FGF18, FGFR1, FGF6, FGF5, FGF22
PID_ATR_PATHWAY	35	0.257804	0.128113	0.390214	0.000176026	0.000589029	RFC2, YWHAZ, PPP2R1A, RPA1, RPA2, MCM2, PLK1, TOPBP1, NBN, TIMELESS, RFC5, CCNA2, CDC6, RFC4, RFC3, CEP164, CDK2, RAD1, CDC25A, RAD9A, HUS1, RAD51, CDC25C, CHEK1, RAD17, BRCA2, PPP2CA, YWHAB, MCM7, FBXW11, ATR, PPP2R2B, MDM2, SMARCAL1, TIPIN
REACTOME_PTM_GAMMA_CARBOXYLATION_HYPUSINE_FORMATION_AND_ARYLSULFATASE_ACTIVATION	12	0.425904	0.216865	0.63092	0.000182416	0.000608837	EIF5A, FURIN, DHPS, STS, ARSA, GGCX, F10, PROS1, DOHH, ARSF, VKORC1, ARSJ
PID_TCPTP_PATHWAY	41	0.263325	0.129007	0.40046	0.000184142	0.000613016	STAT1, KPNA2, STAT6, PIK3R2, SHC1, JAK1, EGFR, CREBBP, PDGFRB, PTPN1, PIK3R3, STAT5A, CSF1R, LMAN1, MET, RAB4A, PIK3CD, KDR, PDGFB, EIF2AK2, PIK3CA, PTPN2, STAT5B, EGF, CSF1, GAB1, JAK3, INSR, KPNB1, STAT3, ATR, HGF, VEGFA, ITGB1, PIK3R1, PIK3CB, SOS1, SRC, ITGA1, GRB2, PIAS1
ST_IL_13_PATHWAY	6	-0.517488	0.735064	0.305633	0.000186175	0.000618195	JAK1, IL13RA1, IL4R, TYK2, JAK2, IL13
BIOCARTA_MITOCHONDRIA_PATHWAY	20	0.305783	0.151319	0.453972	0.000187012	0.000619387	BIRC2, CASP3, DFFA, BCL2, BAK1, CASP9, BID, ENDOG, APAF1, AIFM1, BIK, BCL2L1, DFFB, CASP7, CASP8, BAX, CYCS, CASP6, BIRC3, DIABLO
PID_KIT_PATHWAY	48	0.273466	0.131582	0.409582	0.00019111	0.000631346	BAD, STAT1, RAF1, SHC1, CREBBP, MAP2K2, LYN, MAP2K1, STAT5A, SH2B3, BCL2, PTEN, FOXO3, RPS6KB1, PIK3CA, PIK3C2B, PDPK1, KIT, SH2B2, JAK2, PTPN11, CRKL, VAV1, MATK, MAP4K1, TEC, FER, PTPN6, KITLG, GAB1, AKT1, MITF, PTPRO, STAT3, GRB10, GSK3B, EPOR, SOCS1, DOK1, MAPK3, PIK3R1, SPRED2, SOS1, HRAS, SNAI2, GRB2, EPO, STAP1
PID_CDC42_REG_PATHWAY	25	0.167199	0.0811997	0.254357	0.000192391	0.000633959	ARHGDIA, NME1, ARHGAP1, ARHGEF7, PLCG1, RALBP1, ARHGEF9, APC, BCAR3, FARP2, FGD1, VAV2, CDC42, ITSN1, ARHGEF6, ITSN2, DOCK9, DNMBP, MCF2L, DOCK10, GIT1, ARHGAP17, VAV3, DOCK6, RACGAP1
KEGG_PROTEIN_EXPORT	17	0.299877	0.155335	0.447443	0.000193662	0.000636529	SPCS2, SRP9, SEC11A, SEC63, SEC61B, SEC61G, SRP54, SRP19, SRP72, OXA1L, SEC62, HSPA5, SEC61A1, SPCS1, SRPRB, SPCS3, SEC61A2
KEGG_ONE_CARBON_POOL_BY_FOLATE	14	0.475139	0.229983	0.710335	0.000200545	0.000657483	MTHFD2, MTHFD1, DHFR, TYMS, MTHFS, MTR, AMT, ALDH1L1, MTHFR, ATIC, SHMT1, GART, SHMT2, MTHFD2L
REACTOME_DNA_REPAIR	88	0.146917	0.0697281	0.220966	0.000205229	0.00067114	RFC2, XRCC6, POLD2, PCNA, RAD23B, RPA1, RPA2, POLR2B, ERCC3, POLR2G, USP1, ERCC5, GTF2H1, POLR2L, POLR2K, POLR2A, LIG1, NBN, POLD4, TP53BP1, MDC1, RFC5, DDB2, POLD1, FANCG, MNAT1, GTF2H4, POLB, XRCC1, POLR2D, MPG, ERCC1, TDG, FANCA, RFC4, CCNH, LIG3, RFC3, BRCA1, FEN1, MGMT, RAD51, XRCC4, ERCC8, FANCC, OGG1, MRE11A, H2AFX, RAD52, XPA, POLE2, LIG4, MUTYH, REV3L, BRCA2, RAD50, ATM, DDB1, XRCC5, PRK…
BIOCARTA_GSK3_PATHWAY	24	0.298127	0.143068	0.446884	0.000205946	0.000671788	CTNNB1, IRAK1, GJA1, CD14, RELA, DVL1, APC, EIF2AK2, PIK3CA, FZD1, PDPK1, LY96, AKT1, PPP2CA, CCND1, MYD88, NFKB1, GNAI1, GSK3B, LEF1, PIK3R1, AXIN1, TOLLIP, TLR4
REACTOME_STEROID_HORMONES	18	0.808432	0.435757	1.16602	0.000206692	0.000672529	LGMN, AKR1B1, CYP19A1, HSD3B1, STAR, CGA, SRD5A1, HSD11B1, CYP27B1, HSD17B1, CYP24A1, SRD5A2, CYP2R1, STARD5, LHB, CYP21A2, CYP11B2, SRD5A3
REACTOME_RECYCLING_PATHWAY_OF_L1	22	-0.516023	0.776041	0.26101	0.000207458	0.000673329	MSN, AP2B1, AP2M1, CLTC, DPYSL2, CLTA, AP2S1, DNM2, RPS6KA1, RPS6KA3, L1CAM, RPS6KA4, RPS6KA5, RPS6KA2, RDX, SH3GL2, MAPK1, EZR, AP2A2, SRC, DNM1, KIF4A
SIG_INSULIN_RECEPTOR_PATHWAY_IN_CARDIAC_MYOCYTES	43	0.288119	0.138492	0.436296	0.000212239	0.000687124	CAP1, YWHAZ, YWHAQ, YWHAH, RAF1, FLOT2, SHC1, INPPL1, BRD4, GSK3A, PTPN1, FOXO1, RPS6KA1, RPS6KA3, PIK3CD, PTEN, RPS6KB1, PIK3CA, PDPK1, IRS1, RPS6KA2, CYTH3, CDKN2A, AKT1, IRS4, SORBS1, LNPEP, MAPK1, CDC42, YWHAB, FLOT1, IRS2, SFN, GSK3B, PARD3, YWHAE, SERPINB6, SOS2, MAPK3, PIK3R1, AKT3, SOS1, GRB2
REACTOME_G_ALPHA_I_SIGNALLING_EVENTS	101	0.314611	0.152782	0.479822	0.000218962	0.000707123	CCL5, APP, GNB1, GNAS, GNB2, ANXA1, GNAI2, GNAI3, GNG10, AGT, RGS1, GABBR1, CXCL12, ADCY7, CXCL9, GNB5, LPAR1, GNG11, RGS19, RGS4, CXCL1, ADCY9, CXCL10, CCL21, S1PR1, GNAZ, CCR1, FPR1, HCAR3, CXCL13, NPY1R, CCL20, ADORA1, C5, RGS12, BDKRB2, PNOC, NMU, RGS11, CXCR5, ADORA3, RGS7, CXCL6, CCR7, S1PR4, RHO, RGS9, CNR2, P2RY14, LPAR2, ADCY8, GNG7, PMCH, CXCR6, CCR2, CCR6, CCR5, CXCR2, CXCR1, GNG5, NPY…
REACTOME_CALNEXIN_CALRETICULIN_CYCLE	11	0.431559	0.210806	0.650175	0.000228407	0.00073579	CANX, PRKCSH, CALR, EDEM1, PDIA3, GANAB, UGGT1, EDEM2, MAN1B1, UGGT2, EDEM3
KEGG_NOTCH_SIGNALING_PATHWAY	35	-0.224935	0.336368	0.111169	0.000232172	0.000746062	HDAC1, CTBP2, SNW1, HDAC2, DVL3, CREBBP, KAT2A, EP300, MAML1, NOTCH2, DVL1, NOTCH3, CTBP1, HES1, PSEN1, KAT2B, MFNG, PSEN2, NOTCH4, ADAM17, NCOR2, RBPJ, NCSTN, JAG1, CIR1, JAG2, PTCRA, DTX4, RFNG, DTX2, PSENEN, APH1A, DVL2, NOTCH1, DTX3
REACTOME_TRANS_GOLGI_NETWORK_VESICLE_BUDDING	48	-0.277581	0.424046	0.134987	0.000237169	0.000760231	ARF1, CLTC, FTH1, M6PR, CLTA, RAB5C, PUM1, IGF2R, GBF1, VAMP2, TPD52, CPD, SNX2, DNM2, GAK, AP3S1, VAMP8, BLOC1S1, VAMP7, PICALM, AP3B1, AP1S2, AP1G1, OCRL, STX4, GNS, TPD52L1, TGOLN2, DNAJC6, AP1S1, AP1B1, SH3GL2, NAPA, TFRC, SNAP23, NECAP1, HIP1R, DNASE2, CTSZ, YIPF6, FTL, SORT1, PIK3C2A, SNX5, AP1M2, ARRB1, TBC1D8B, TXNDC5
PID_PLK1_PATHWAY	39	0.481044	0.227712	0.729174	0.000244495	0.000781779	RHOA, PPP2R1A, NUDC, PPP1CB, PPP1R12A, TUBG1, CDC25B, PLK1, ROCK2, CDC20, KIF2A, CDK1, BUB1B, AURKA, NDC80, GOLGA2, CENPE, CDC25C, NINL, RAB1A, STAG2, CDC14B, PPP2CA, FZR1, FBXW11, PAK1, BUB1, TPX2, ODF2, TPT1, WEE1, CCNB1, GORASP1, PRC1, KIF20A, FBXO5, BORA, ERCC6L, ECT2
REACTOME_INTERFERON_ALPHA_BETA_SIGNALING	44	0.780901	0.369827	1.17526	0.000250855	0.000798269	STAT1, IFITM2, IFITM1, JAK1, EGR1, ADAR, MX1, IFI27, IRF1, IRF6, IRF3, PTPN1, GBP2, OAS1, IFIT1, IRF2, IRF9, IRF8, IFNAR1, IFI6, IRF4, ISG20, IFIT3, IFNAR2, OAS2, MX2, STAT2, IRF5, ISG15, TYK2, OASL, XAF1, SOCS3, PTPN6, IRF7, PSMB8, IFI35, SOCS1, IFITM3, IFIT2, IP6K2, OAS3, USP18, RNASEL
BIOCARTA_STRESS_PATHWAY	23	-0.304185	0.455854	0.149341	0.000250885	0.000798269	TRADD, JUN, NFKBIA, RELA, MAPK14, MAP2K4, TRAF2, MAP4K2, MAP3K14, MAP2K6, LTA, TNF, TANK, TNFRSF1A, MAP2K3, NFKB1, IKBKB, CHUK, CRADD, IKBKG, RIPK1, MAP3K1, ATF1
REACTOME_MRNA_CAPPING	27	0.229594	0.113369	0.344696	0.000255599	0.000809999	SUPT5H, NCBP2, POLR2B, ERCC3, POLR2G, GTF2F1, GTF2H1, POLR2L, POLR2K, RNMT, POLR2A, MNAT1, GTF2H4, POLR2D, CCNH, RNGTT, POLR2C, POLR2H, POLR2F, NCBP1, GTF2F2, CDK7, POLR2J, POLR2I, POLR2E, GTF2H2B, GTF2H3
REACTOME_CLASS_C_3_METABOTROPIC_GLUTAMATE_PHEROMONE_RECEPTORS	6	0.285301	0.154793	0.41055	0.000255973	0.000809999	GABBR1, GABBR2, GRM4, CASR, GRM1, GRM7
PID_PI3K_PLC_TRK_PATHWAY	30	0.40697	0.191717	0.613472	0.000256447	0.000809999	BAD, YWHAZ, YWHAQ, YWHAH, SHC1, EGR1, PRKCD, NRAS, PLCG1, STAT5A, KRAS, FOXO3, CREB1, PIK3CA, PDPK1, AGAP2, GAB1, AKT1, CCND1, YWHAB, SFN, GSK3B, YWHAE, PIK3R1, EPB41L1, SOS1, HRAS, SRC, GRB2, TRPV1
REACTOME_EARLY_PHASE_OF_HIV_LIFE_CYCLE	13	0.313669	0.153076	0.472129	0.00025772	0.000812038	XRCC6, PPIA, LIG1, CD4, FEN1, XRCC4, PSIP1, HMGA1, LIG4, CCR5, XRCC5, CXCR4, BANF1
REACTOME_SIGNALING_BY_HIPPO	15	0.344997	0.168515	0.523854	0.000272192	0.000855554	MOB1A, TJP1, TJP2, WWTR1, CASP3, AMOTL2, STK3, STK4, YWHAB, YWHAE, WWC1, YAP1, NPHP4, SAV1, DVL2
SIG_REGULATION_OF_THE_ACTIN_CYTOSKELETON_BY_RHO_GTPASES	28	0.264107	0.123845	0.400663	0.000283994	0.000890488	GDI2, CFL1, PFN1, ACTR2, FLNA, ACTR3, FSCN1, GDI1, VASP, ACTG2, MYLK, ROCK2, PAK4, WASF1, LIMK1, MYH2, PFN2, WASL, RHO, AKT1, FLNC, CDC42, PAK2, PAK1, ANGPTL2, ROCK1, PAK3, PAK6
BIOCARTA_PTDINS_PATHWAY	21	0.335882	0.160269	0.515175	0.000285832	0.000894089	BAD, ARF1, AP2M1, PFKP, PFKL, PRKCZ, GSK3A, LYN, PLCG1, RPS6KB1, PDPK1, EEA1, BTK, VAV2, RAB5A, AKT1, ARHGEF2, RAC1, JAG1, GSK3B, PFKM
REACTOME_PHOSPHOLIPASE_C_MEDIATED_CASCADE	35	0.290749	0.151308	0.433108	0.000286973	0.000895494	PRKAR1A, CALM2, ITPR3, PRKCD, ITPR2, PRKACB, PLCG1, PRKACA, FGFR2, PRKAR2B, ADCY7, CREB1, FGFR3, FGF2, ADCY9, FGFR4, PRKAR2A, FGF1, FGF7, KL, ADCY8, FGF18, PRKACG, FGFR1, PDE1A, FGF6, ADCY6, ADCY3, FGF5, PRKAR1B, PRKCA, ADCY2, ADCY1, CALM1, FGF22
REACTOME_GLYCOGEN_BREAKDOWN_GLYCOGENOLYSIS	14	0.45206	0.237383	0.658035	0.000289608	0.000899426	CALM2, PYGB, GYG1, PGM1, PHKB, PYGL, AGL, PHKG2, PHKA1, PYGM, PHKG1, PHKA2, GYG2, CALM1
REACTOME_GASTRIN_CREB_SIGNALLING_PATHWAY_VIA_PKC_AND_MAPK	110	0.18724	0.0878314	0.282617	0.000289622	0.000899426	APP, GNB1, GNB2, ANXA1, ITPR3, RAF1, PIK3R2, GNG10, EGFR, RGS2, MAP2K2, PRKCD, GNAQ, NRAS, ITPR2, MAP2K1, PIK3R3, AGT, CDK1, RPS6KA1, DGKA, HBEGF, RPS6KA3, PLCB4, F2R, GNB5, KRAS, LPAR1, PLCB2, GNG11, GNA11, EDNRB, CREB1, RGS19, PIK3CA, GRK5, EDNRA, RPS6KA2, NMB, GNA15, AGTR1, HRH1, RASGRP1, MMP3, BDKRB2, NMU, PRKCH, GPR4, P2RY2, PTAFR, NTS, GRP, XCL1, NPFF, F2RL1, TRPC6, TAC1, HTR2B, LPAR2, EDN2…
BIOCARTA_SET_PATHWAY	11	0.685358	0.383334	0.993685	0.000294018	0.000910894	SET, ANP32A, NME1, CREBBP, DFFA, GZMA, DFFB, HMGB2, APEX1, GZMB, PRF1
REACTOME_FACTORS_INVOLVED_IN_MEGAKARYOCYTE_DEVELOPMENT_AND_PLATELET_PRODUCTION	85	0.201138	0.0946706	0.309837	0.000298416	0.00092231	H3F3B, PRKAR1A, MFN2, HDAC1, CAPZA2, AKAP1, TP53, HDAC2, KIF5B, ABL1, CREBBP, KIF22, EP300, IRF1, IRF3, PRKACB, PRKACA, KIF2A, DOCK1, IRF2, SH2B3, KIFAP3, KIF3C, PRKAR2B, KIF3B, CDK5, CDK2, KIF11, KIF23, MYB, PRKAR2A, MAFG, DOCK4, AKAP10, MAFF, EHD2, SH2B2, JAK2, HBE1, RAD51C, HIST1H3B, RAB5A, MAFK, HBD, MFN1, PRKACG, GATA2, EHD1, CAPZA1, IRF7, HIST1H3C, RAC1, CDC42, HMG20B, HBB, VPS45, SH2B1, KI…
KEGG_VASOPRESSIN_REGULATED_WATER_REABSORPTION	37	0.248766	0.11525	0.381265	0.000310559	0.000957007	DYNLL1, GNAS, RAB11A, DCTN2, DCTN1, RAB5C, ARHGDIA, RAB5B, ARHGDIB, VAMP2, NSF, PRKACB, PRKACA, DCTN6, STX4, DYNC1LI2, AQP3, DYNC2LI1, PRKX, CREB1, ADCY9, DYNC1I1, CREB5, RAB5A, PRKACG, ADCY6, DCTN5, ADCY3, CREB3, DYNC1I2, DYNC1H1, CREB3L2, CREB3L1, RAB11B, DYNC1LI1, DCTN4, DYNC2H1
REACTOME_CASPASE_MEDIATED_CLEAVAGE_OF_CYTOSKELETAL_PROTEINS	11	-0.365174	0.549463	0.177029	0.00031112	0.000957007	GSN, PLEC, VIM, CASP3, MAPT, GAS2, CASP7, CASP8, ADD1, SPTAN1, CASP6
REACTOME_CELL_CYCLE_CHECKPOINTS	101	0.223927	0.103358	0.347026	0.000318509	0.000977416	RFC2, PSMB2, ANAPC5, PSMB7, PSME1, PSMD8, PSMD2, PSMB1, PSMD4, PSMF1, PSMC2, PSMA7, PSMD1, PSMD13, PSMC4, PSMC3, PSMA5, PSMA2, PSMD3, PSMB3, BUB3, RPA1, PSMA3, MCM3, PSMA1, PSMC6, PSMD7, TP53, MCM5, RPA2, PSME2, MCM6, MCM2, PSMB4, CDKN1A, PSMD12, PSMB10, CCNB2, PSMA6, CDC16, PSMD6, CDC20, CDC23, UBE2C, RFC5, CDK1, ORC4, MAD2L1, PSMA4, PSMD5, BUB1B, CDC6, RFC4, CDC45, RFC3, PSMC1, DBF4, CDK2, PSMB…
REACTOME_MEIOTIC_SYNAPSIS	42	0.21291	0.0994443	0.321764	0.000320485	0.000981153	RAD21, H2AFZ, TERF2IP, SMC1A, STAG1, HIST2H2BE, SYNE2, LMNB1, LMNA, TERF1, TERF2, POT1, BRCA1, ACD, H2AFX, HIST4H4, SYCP2, SYCP1, STAG2, HIST1H4H, HIST1H2BI, HIST1H2BE, HIST1H2BH, HIST1H2AJ, UBE2I, SMC3, SYNE1, HIST1H2BK, ATR, HIST1H2BD, HIST1H2BG, HSPA2, SUN2, DIDO1, HIST2H2AA3, HIST1H4J, HIST1H2AE, HIST1H4I, HIST1H2AC, REC8, STAG3, TINF2
KEGG_NITROGEN_METABOLISM	19	0.348247	0.161411	0.53366	0.000334827	0.00102264	GLUL, GLUD1, GLS, CA12, AMT, CA3, CPS1, ASNS, CA9, GLS2, CA1, CA4, HAL, CA6, CA2, CA5B, GLUD2, CTH, CA14
PID_AMB2_NEUTROPHILS_PATHWAY	39	-0.42734	0.654924	0.204426	0.000347772	0.00105968	RHOA, HMGB1, LRP1, RAP1B, MMP2, PLAT, PRKCZ, RAP1A, LYN, ICAM1, ITGB2, YES1, TLN1, MMP9, MYH2, LCK, APOB, IL6, MST1R, PLAU, MST1, ITGAM, SELP, BLK, TNF, AKT1, HCK, FGR, THY1, CTGF, NFKB1, SELPLG, AGER, FYN, PLAUR, JAM3, ROCK1, SRC, JAM2
PID_LKB1_PATHWAY	36	0.291848	0.136112	0.441257	0.000351452	0.00106838	YWHAZ, YWHAQ, CTSD, YWHAH, TP53, PRKAG1, PRKAB1, MYC, SMAD4, PRKACA, MAPT, MARK2, SMARCD3, SIK3, PSEN2, STK11, CREB1, ESR1, SIK1, EZR, YWHAB, SFN, TSC1, PRKAA1, GSK3B, CDC37, MAP2, HSP90AA1, YWHAE, ETV4, SIK2, TSC2, CAB39, MLST8, STRADA, MARK4
PID_FOXO_PATHWAY	46	-0.206594	0.321133	0.096711	0.000352556	0.00106923	YWHAZ, YWHAQ, RAN, YWHAH, CAT, USP7, CTNNB1, SGK1, RALB, CREBBP, EP300, PLK1, CSNK1E, CSNK1G2, FOXO1, BCL6, MAPK9, SKP2, GADD45A, KAT2B, FOXO3, CDK2, MAPK10, FOXO4, MST1, CSNK1A1, G6PC, AKT1, CSNK1D, YWHAB, XPO1, CDKN1B, SFN, IKBKB, CHUK, ZFAND5, YWHAE, FASLG, RBL2, RALA, CCNB1, SOD2, SIRT1, CSNK1G1, CSNK1G3, BCL2L11
REACTOME_SHC_MEDIATED_CASCADE	18	0.38208	0.200618	0.556189	0.000354666	0.00107311	SHC1, NRAS, FGFR2, KRAS, FGFR3, FGF2, FGFR4, FGF1, FGF7, KL, FGF18, FGFR1, FGF6, FGF5, SOS1, HRAS, GRB2, FGF22
PID_DELTA_NP63_PATHWAY	43	0.184388	0.0851835	0.285673	0.000368831	0.00111337	ADRM1, TOP2A, ITGA3, KRT5, PPP2R5A, AXL, CCNB2, GPX2, COL5A1, HES1, CEBPD, VDR, SEC14L2, ADA, RRAD, MRE11A, FOSL2, BDKRB2, NRG1, T, CDKN2A, HBP1, TP63, IL1A, BRCA2, ATM, SFN, KRT14, ITCH, GSK3B, IGFBP3, POU2F2, FASN, WWP1, YAP1, DLX5, MDM2, PERP, FBXW7, NOTCH1, RAB38, HELLS, TCF7L1
KEGG_REGULATION_OF_ACTIN_CYTOSKELETON	171	0.163578	0.0749153	0.254095	0.000373967	0.00112625	CFL1, RHOA, MSN, ACTN4, PFN1, GSN, PPP1CC, IQGAP1, ACTB, PPP1CA, VCL, ARPC1A, MYL9, PIP4K2B, PXN, ITGB5, RAF1, MYL12A, ARHGEF12, ITGA5, PPP1CB, PIK3R2, ITGA3, PPP1R12A, ITGA6, CD14, ARAF, ARPC1B, EGFR, ARHGAP35, LIMK2, CRK, PDGFRB, CSK, ITGAV, MAP2K2, ARHGEF7, MYLK, NRAS, MAP2K1, PIK3R3, ROCK2, ITGB2, ARHGEF1, PDGFRA, PAK4, DOCK1, IQGAP2, APC, FGFR2, ACTN2, PIK3CD, F2R, KRAS, WASF1, PDGFB, LIMK1,…
KEGG_PROXIMAL_TUBULE_BICARBONATE_RECLAMATION	19	0.460617	0.22089	0.705362	0.000379796	0.00114115	GLUD1, MDH1, ATP1B1, PCK2, GLS, ATP1A2, SLC4A4, ATP1B2, GLS2, FXYD2, CA4, AQP1, PCK1, ATP1B3, CA2, GLUD2, SLC25A10, ATP1B4, ATP1A1
REACTOME_CELL_CYCLE	328	0.202452	0.0895699	0.310757	0.000400727	0.00120125	RFC2, PSMB2, ANAPC5, RAD21, PPP2R1A, DYNLL1, SKP1, MAPRE1, ACTR1A, PPP1CC, RPS27, NUMA1, PSMB7, PAFAH1B1, PSME1, PSMD8, PSMD2, H2AFZ, PSMB1, PSMD4, DCTN2, CCND2, PSMF1, PSMC2, DCTN1, RBBP7, PSMA7, POLD2, NUDC, TERF2IP, PSMD1, PCNA, HDAC1, PSMD13, PSMC4, PSMC3, PSMA5, PSMA2, PPP2CB, PSMD3, PSMB3, BUB3, RUVBL2, RPA1, PSMA3, MCM3, SMC1A, RUVBL1, PSMA1, PSMC6, CCND3, PSMD7, MYBL2, RANBP2, TUBG1, TP53…
REACTOME_HDL_MEDIATED_LIPID_TRANSPORT	10	-0.630871	0.956289	0.318623	0.000410894	0.00122889	SCARB1, PLTP, BMP1, APOE, ABCA1, LCAT, ABCG1, CETP, A2M, AMN
KEGG_GALACTOSE_METABOLISM	17	-0.290305	0.445144	0.13338	0.000419469	0.00125164	HK1, PFKP, PFKL, AKR1B1, GLB1, B4GALT1, PGM1, GALE, GAA, HK2, GALT, GALK2, UGP2, G6PC, B4GALT2, PFKM, GLA
REACTOME_P2Y_RECEPTORS	9	0.364959	0.186812	0.546822	0.00044899	0.00133665	P2RY2, P2RY14, LPAR4, P2RY1, P2RY6, P2RY11, P2RY10, LPAR6, P2RY13
REACTOME_TRANSPORT_OF_RIBONUCLEOPROTEINS_INTO_THE_HOST_NUCLEUS	25	0.247486	0.117839	0.379849	0.000453955	0.00134833	RAE1, RANBP2, TPR, KPNA1, NUP153, NUP62, NUP214, NUP133, NUP93, NUP88, NUPL2, POM121, NUP155, KPNB1, NUP205, NUP210, NUP188, NUP50, NUP85, AAAS, NUP54, NUP37, NUP107, NUP43, SEH1L
PID_SYNDECAN_2_PATHWAY	27	-0.350936	0.529527	0.16861	0.000456183	0.00135185	RHOA, SDCBP, MMP2, ITGA5, PRKCD, RASA1, CASP3, PRKACA, CAV2, LAMA3, NF1, ITGA2, CASK, TNFRSF13B, EPB41, MAPK1, BAX, EZR, EPHB2, CSF2, FN1, ITGB1, MAPK3, SDC2, HRAS, SRC, TRAPPC4
BIOCARTA_ACE2_PATHWAY	10	-0.541436	0.834341	0.260404	0.000459765	0.00135935	AGT, AGTR1, REN, COL4A2, COL4A1, COL4A5, COL4A6, CMA1, COL4A4, ACE2
REACTOME_AUTODEGRADATION_OF_THE_E3_UBIQUITIN_LIGASE_COP1	43	0.245637	0.109911	0.383195	0.000479571	0.00141468	PSMB2, PSMB7, PSME1, PSMD8, PSMD2, PSMB1, PSMD4, PSMF1, PSMC2, PSMA7, PSMD1, PSMD13, PSMC4, PSMC3, PSMA5, PSMA2, PSMD3, PSMB3, PSMA3, PSMA1, PSMC6, PSMD7, TP53, PSME2, PSMB4, PSMD12, PSMB10, PSMA6, PSMD6, PSMA4, PSMD5, PSMC1, PSMB9, PSMD9, ATM, PSMD11, PSMB5, PSMB6, PSMB8, PSMC5, PSME4, PSMD14, PSMD10
REACTOME_FGFR1_LIGAND_BINDING_AND_ACTIVATION	6	1.13478	0.677763	1.57339	0.000488896	0.00143891	FGF2, FGF1, FGFR1, FGF6, FGF5, FGF22
PID_SMAD2_3NUCLEAR_PATHWAY	70	0.268798	0.121719	0.409908	0.000492981	0.00144764	LAMC1, NCOR1, RBBP7, ITGB5, HDAC1, JUN, HDAC2, NR3C1, CREBBP, KAT2A, EP300, CDK4, E2F4, CDKN1A, CBFB, COL1A2, MYC, SMAD4, SERPINE1, TCF3, ATF3, FOXO1, PIAS3, SMAD2, TGIF1, CTBP1, ZBTB17, KAT2B, FOXO3, TFDP1, RUNX3, CDK2, VDR, SKI, CREB1, SMAD7, SAP30, ESR1, RBL1, SMAD3, ATF2, FOXO4, NCOA2, FOXG1, TFE3, SKIL, AKT1, IL10, CDKN2B, FOXH1, MEF2C, MAX, IRF7, SAP18, NCOA1, FOS, SIN3B, GATA3, RBBP4, AR, …
ST_DIFFERENTIATION_PATHWAY_IN_PC12_CELLS	38	0.247994	0.11221	0.378265	0.000496747	0.0014554	TERF2IP, JUN, SHC1, EGR1, CREBBP, GNAQ, MAPK9, MAP2K4, ELK1, RPS6KA3, PIK3CD, CREB1, PIK3CA, MAPK10, EGR2, DAG1, PTPN11, CREB5, BRAF, EGR3, CRKL, AKT1, EGR4, MAPK1, TUBA1A, CREB3, MAP2K7, CAMP, ASAH1, MAPK3, MAP1B, PIK3R1, MAPK8IP1, MAPK8IP3, SRC, PIK3C2G, FRS2, ATF1
REACTOME_SMOOTH_MUSCLE_CONTRACTION	21	0.510352	0.229006	0.794449	0.000505403	0.00147742	CALM2, VCL, ACTA2, MYL9, ITGB5, MYH11, CALD1, ACTG2, MYLK, TLN1, LMOD1, TPM2, MYL6B, TPM1, SORBS1, SORBS3, TPM4, CALM1, MYL6, TPM3, ITGA1
REACTOME_REGULATION_OF_MRNA_STABILITY_BY_PROTEINS_THAT_BIND_AU_RICH_ELEMENTS	73	0.164245	0.0724257	0.257303	0.000513291	0.0014971	PSMB2, HNRNPD, YWHAZ, PSMB7, HSPA1B, PSME1, PSMD8, PSMD2, PSMB1, PSMD4, ANP32A, PSMF1, PSMC2, PSMA7, PSMD1, PSMD13, PSMC4, PSMC3, PSMA5, PSMA2, PSMD3, PSMB3, MAPKAPK2, ZFP36, PSMA3, PSMA1, PSMC6, PSMD7, ELAVL1, PSME2, HSPB1, NUP214, PSMB4, PSMD12, MAPK14, PRKCD, PSMB10, PSMA6, PSMD6, PSMA4, PSMD5, PARN, PSMC1, PSMB9, KHSRP, EXOSC9, AKT1, TNPO1, PSMD9, EIF4G1, YWHAB, XPO1, PSMD11, PSMB5, PSMB6, PS…
REACTOME_MRNA_SPLICING_MINOR_PATHWAY	39	-0.247058	0.380347	0.110976	0.000535509	0.00155839	PRPF8, SNRNP200, SF3B2, SF3B3, SRSF2, SNRPD2, SF3B1, SRSF7, DDX23, NCBP2, SRSF1, POLR2B, POLR2G, GTF2F1, SNRPD3, POLR2L, POLR2K, SNRPD1, POLR2A, TXNL4A, SNRPE, POLR2D, SNRPF, SNRPG, SRSF6, SNRPB, PRPF6, POLR2C, SF3B4, POLR2H, LSM2, POLR2F, NCBP1, GTF2F2, POLR2J, POLR2I, POLR2E, SNRNP40, SF3B5
REACTOME_CYTOKINE_SIGNALING_IN_IMMUNE_SYSTEM	212	0.241142	0.104031	0.372684	0.000538673	0.00156408	UBA7, EIF4G2, YWHAZ, SKP1, STAT1, KPNA2, RAF1, EIF4A3, IFITM2, PIK3R2, EIF4E, SHC1, SQSTM1, UBE2N, RAE1, IRAK1, INPPL1, IFITM1, IFNGR2, JAK1, UBE2L6, EGR1, RANBP2, TPR, RELA, ADAR, ARIH1, B2M, EIF4G3, KPNA1, MX1, NUP153, NUP62, NUP214, NUP133, NUP93, CRK, GBP1, IFI27, MAP2K2, IRF1, PRKCD, IRF6, IRF3, LYN, ICAM1, NRAS, MAP2K1, PTPN1, IFNGR1, PRKACB, PIK3R3, GBP2, PLCG1, SP100, OAS1, NUP88, PIN1, Y…
KEGG_METABOLISM_OF_XENOBIOTICS_BY_CYTOCHROME_P450	42	0.464529	0.206413	0.712157	0.000541095	0.0015676	CYP2E1, GSTP1, MGST3, GSTO1, EPHX1, CYP1B1, GSTM3, GSTA4, ALDH1A3, GSTT1, GSTM4, AKR1C1, MGST2, GSTM2, UGT1A4, GSTM1, ALDH3B2, GSTT2, ALDH3A1, ALDH3B1, CYP1A1, GSTM5, CYP3A5, CYP3A4, UGT1A1, CYP2B6, CYP1A2, ADH1A, UGT2A1, CYP2C18, ADH5, AKR1C3, GSTZ1, ADH1B, AKR1C2, ADH7, UGT2B28, ADH6, CYP2C9, GSTA1, GSTK1, GSTA3
KEGG_GLYCOSPHINGOLIPID_BIOSYNTHESIS_GANGLIO_SERIES	10	-0.391916	0.608687	0.178431	0.000546809	0.00158062	GLB1, HEXA, HEXB, SLC33A1, ST3GAL5, ST3GAL1, ST8SIA1, B3GALT4, ST3GAL2, ST6GALNAC4
REACTOME_PKA_MEDIATED_PHOSPHORYLATION_OF_CREB	15	-0.235708	0.366342	0.106337	0.000565512	0.00163104	PRKAR1A, PRKACB, PRKACA, PRKAR2B, ADCY7, CREB1, ADCY9, PRKAR2A, ADCY8, PRKACG, ADCY6, ADCY3, PRKAR1B, ADCY2, ADCY1
NABA_ECM_GLYCOPROTEINS	112	-0.416609	0.661085	0.182071	0.000617038	0.0017757	GAS6, SPARC, LAMC1, SPARCL1, THBS1, IGFBP7, CYR61, LAMB1, TGFBI, IGFBP4, TNC, FBLN1, AEBP1, EFEMP1, NID1, VWF, LAMA4, LAMC2, MGP, MATN2, PCOLCE, CRIM1, IGFBP2, LTBP1, FBN1, THBS2, FBLN5, FBN2, CRELD1, MFAP1, NELL2, MFAP2, IGFBP5, LAMA3, SLIT3, IGFBP6, FBLN2, NID2, ZP3, EMILIN1, LTBP4, NOV, LTBP2, THBS4, FGL2, SRPX, VWA5A, LAMA2, COCH, SRPX2, MMRN1, COMP, WISP2, RELN, TNFAIP6, COLQ, NELL1, MATN3, …
REACTOME_SEMA3A_PLEXIN_REPULSION_SIGNALING_BY_INHIBITING_INTEGRIN_ADHESION	13	0.317412	0.141001	0.490207	0.000632781	0.00181697	TLN1, PLXNA3, FARP2, FES, SEMA3A, PLXNA2, RAC1, RND1, FYN, NRP1, PIP5K1C, RRAS, PLXNA1
REACTOME_ACTIVATION_OF_NF_KAPPAB_IN_B_CELLS	57	0.170384	0.0737599	0.268312	0.000634545	0.001818	PSMB2, SKP1, PSMB7, PSME1, PSMD8, PSMD2, PSMB1, PSMD4, PSMF1, PSMC2, PSMA7, PSMD1, PSMD13, PSMC4, PSMC3, PSMA5, PSMA2, PSMD3, PSMB3, NFKBIA, PSMA3, PSMA1, PSMC6, PSMD7, PSME2, RELA, PSMB4, PSMD12, PSMB10, PSMA6, PSMD6, PSMA4, PSMD5, NFKBIE, PSMC1, PSMB9, BTRC, BCL10, REL, MAP3K7, CUL1, PSMD9, PRKCB, MALT1, PSMD11, PSMB5, PSMB6, PSMB8, IKBKB, FBXW11, PSMC5, CHUK, IKBKG, PSME4, PSMD14, NFKBIB, PSMD…
REACTOME_MRNA_SPLICING	97	-0.171941	0.268159	0.0737049	0.000644528	0.00184253	PRPF8, HNRNPC, SRSF9, SNRNP200, RNPS1, HNRNPM, HNRNPD, HNRNPK, HNRNPU, SF3B2, SRSF11, SF3B3, SRSF2, SNRPD2, FUS, HNRNPH1, HNRNPA0, SF3B1, SRSF7, HNRNPH2, SNRNP70, SRRM1, SF3A1, HNRNPF, RBM5, DDX23, NCBP2, PABPN1, SMC1A, SRSF4, SRSF1, SNRPA, POLR2B, HNRNPL, PTBP1, CSTF1, CD2BP2, POLR2G, GTF2F1, DHX9, SNRPB2, SNRPD3, NFX1, POLR2L, POLR2K, SNRPD1, NUDT21, POLR2A, TXNL4A, U2AF1, SRSF3, SNRPE, CDC40, …
PID_RXR_VDR_PATHWAY	21	-0.335939	0.514454	0.153693	0.000673778	0.0019219	THRA, SREBF1, NR4A1, RXRA, MED1, ABCA1, BCL2, RARA, NR1H3, RPS6KB1, RARG, VDR, RARB, TNF, NCOR2, PPARD, PPARG, NCOA1, RXRB, PPARA, NR1H2
ST_P38_MAPK_PATHWAY	35	0.24444	0.106011	0.385771	0.000685411	0.00195079	DUSP1, EIF4E, MAPKAPK2, HSPB1, SRF, MAPK14, IL1R1, MAP2K4, ELK1, GADD45A, MAP3K5, TAB1, MAP3K4, CREB1, TRAF6, MAP2K6, CREB5, NR2C2, MAP3K10, MAP3K7, AKT1, MAP2K3, MAPK1, CDC42, NFKB1, CREB3, MKNK1, MAPK13, TAB2, MAPK11, MAPKAPK5, DUSP10, MKNK2, ATF1, MYEF2
REACTOME_ABC_FAMILY_PROTEINS_MEDIATED_TRANSPORT	21	0.419726	0.208611	0.635253	0.000692804	0.00196546	PEX19, ABCC1, ABCD3, ABCB6, ABCC4, PEX3, ABCA3, ABCG1, ABCA8, CFTR, ABCD1, ABCG4, ABCC3, ABCC9, ABCC5, ABCB1, ABCA4, ABCA2, ABCA12, ABCA6, ABCA7
BIOCARTA_CERAMIDE_PATHWAY	21	-0.351085	0.542584	0.155577	0.000693603	0.00196546	TRADD, BAD, RAF1, RELA, FADD, MAP2K1, MAP2K4, NSMAF, BCL2, TRAF2, AIFM1, TNFRSF1A, CASP8, MAPK1, BAX, CYCS, NFKB1, SMPD1, RIPK1, MAPK3, MAP3K1
BIOCARTA_IL3_PATHWAY	14	-0.482917	0.756203	0.220711	0.000716546	0.00202604	RAF1, SHC1, MAP2K1, STAT5A, STAT5B, CSF2RB, JAK2, IL3RA, PTPN6, FOS, MAPK3, SOS1, HRAS, GRB2
PID_PS1_PATHWAY	41	-0.358573	0.555124	0.157905	0.00073763	0.00208111	HDAC1, JUN, CTNNB1, CREBBP, MYC, PPP2R5D, ADAM10, TLE1, DVL1, CTBP1, PSEN1, APC, TAB1, FZD1, DKK1, WIF1, LRP6, CSNK2A1, CSNK1A1, MAP3K7, RBPJ, PPARD, MAPK1, CCND1, NCSTN, FOS, FBXW11, GSK3B, HNF1A, MAPK3, AXIN1, NEDD4, AES, PSENEN, NLK, APH1A, NOTCH1, KREMEN2, FRAT1, DKK2, APH1B
BIOCARTA_CASPASE_PATHWAY	21	0.381898	0.179523	0.588509	0.000748357	0.00210679	ARHGDIB, BIRC2, CASP3, LMNB1, DFFA, LMNA, CASP9, APAF1, CASP10, CASP1, DFFB, CASP7, CASP8, PARP1, CYCS, CASP4, CASP6, GZMB, BIRC3, PRF1, LMNB2
REACTOME_CIRCADIAN_REPRESSION_OF_EXPRESSION_BY_REV_ERBA	20	0.238256	0.102019	0.368959	0.000778306	0.00218635	NCOR1, TBL1X, CREBBP, EP300, RXRA, MED1, SMARCD3, CLOCK, NPAS2, NCOA2, NCOA3, NCOA6, NCOA1, ARNTL, RORA, PPARA, HDAC3, PPARGC1A, TGS1, TBL1XR1
PID_IL8_CXCR2_PATHWAY	29	-0.322861	0.505234	0.136666	0.000791454	0.00221266	PPP2R1A, GNB1, RAB11A, GNAI2, VASP, LYN, ARRB2, PLCB2, ELMO1, PDPK1, GNA15, RAB5A, PIK3CG, CXCR2, AKT1, RAC2, PRKCB, HCK, FGR, PPP2CA, PLD2, PLCB1, RAB7A, PRKCA, DOCK2, PLCB3, DNM1, ARRB1, GNA14
PID_INSULIN_GLUCOSE_PATHWAY	20	0.198679	0.0845709	0.308151	0.000791509	0.00221266	YWHAZ, YWHAQ, PPP1CC, YWHAH, VAMP2, GYS1, PRKCZ, TRIP10, TBC1D4, STX4, PPP1R3A, AKT1, INSR, LNPEP, YWHAB, SFN, PRKCI, GSK3B, YWHAE, RHOQ
KEGG_CALCIUM_SIGNALING_PATHWAY	118	0.18688	0.0776124	0.291715	0.000792798	0.00221266	CALM2, SLC25A5, GNAS, ITPR3, EGFR, PDGFRB, PPP3CA, PPP3CB, ERBB3, MYLK, GNAQ, ITPR2, PHKB, PRKACB, PLCG1, PRKACA, SLC25A4, PTK2B, PDGFRA, PHKG2, ITPR1, ITPKB, ADCY7, PLCB4, F2R, PLCB2, PRKX, P2RX4, PPID, GNA11, EDNRB, EDNRA, ADCY9, PPP3R1, PLCG2, ATP2B2, PLN, ADORA2A, PLCE1, PLCD1, GNA15, AGTR1, TNNC2, ATP2B4, ATP2A1, PHKA1, RYR1, HRH1, CD38, BST1, TRPC1, CACNA1H, BDKRB2, ITPKA, ADORA2B, CHP2, AD…
BIOCARTA_GLEEVEC_PATHWAY	22	-0.453891	0.715202	0.199475	0.000795775	0.00221619	BAD, STAT1, RAF1, JUN, BCR, MYC, MAP2K1, STAT5A, MAP2K4, PIK3CA, STAT5B, JAK2, CRKL, PIK3CG, AKT1, FOS, MAPK3, PIK3R1, SOS1, HRAS, MAP3K1, GRB2
PID_FANCONI_PATHWAY	37	0.247838	0.104596	0.394086	0.000811281	0.00225453	RFC2, RPA1, RPA2, USP1, TOPBP1, NBN, RFC5, HES1, FANCG, FAN1, FANCA, RFC4, RFC3, RAD1, BRCA1, RAD9A, HUS1, TOP3A, FANCC, CHEK1, MRE11A, H2AFX, BLM, RAD17, BRCA2, RAD50, ATM, FBXW11, ATR, FANCI, APITD1, FANCL, FANCF, RMI1, PALB2, FANCE, WDR48
PID_ERBB_NETWORK_PATHWAY	13	0.456527	0.200357	0.718058	0.00081782	0.00226783	EGFR, ERBB3, HBEGF, TGFA, AREG, EREG, NRG1, EGF, ERBB4, NRG2, BTC, HSP90AA1, ERBB2
BIOCARTA_NKCELLS_PATHWAY	17	-0.278223	0.436179	0.123505	0.000834023	0.00230545	B2M, MAP2K1, PTK2B, PIK3CA, VAV1, IL18, PTPN6, KLRC1, SYK, KLRC3, KLRD1, RAC1, PAK1, LAT, ITGB1, MAPK3, PIK3R1
PID_HEDGEHOG_GLI_PATHWAY	40	0.193472	0.0800686	0.302262	0.000834948	0.00230545	GNB1, GNAI2, RBBP7, GNAI3, HDAC1, HDAC2, CREBBP, CSNK1E, PRKCD, CSNK1G2, MAP2K1, PRKACA, MTSS1, ARRB2, SPOP, IFT88, GNAO1, SAP30, GNAZ, GLI3, CSNK1A1, GLI1, GLI2, AKT1, CSNK1D, SAP18, XPO1, LGALS3, SIN3B, FBXW11, GNAI1, PTCH1, GSK3B, RBBP4, KIF3A, PIAS1, SMO, CSNK1G1, CSNK1G3, RAB23
KEGG_JAK_STAT_SIGNALING_PATHWAY	101	0.235051	0.101429	0.371465	0.000866428	0.00238369	STAT1, CCND2, STAT6, PIK3R2, IFNGR2, JAK1, CCND3, IL13RA1, CREBBP, EP300, MYC, IFNGR1, PIK3R3, STAT5A, PIAS3, IL4R, SOCS2, STAM, CSF3R, PIK3CD, IRF9, SPRY2, IL2RG, IFNAR1, PIK3CA, IL11RA, IFNAR2, IL6ST, IL10RA, STAT5B, CSF2RB, STAT2, IL6, LIF, IL2RB, GHR, TYK2, CNTFR, OSMR, IL7R, JAK2, PTPN11, LIFR, IL6R, IL15, STAT4, IL3RA, IL2RA, SOCS3, PIK3CG, IL24, BCL2L1, PTPN6, IL7, IL12RB2, CSF2RA, LEP, AK…
REACTOME_METABOLISM_OF_NUCLEOTIDES	57	0.161805	0.0686622	0.256204	0.000866964	0.00238369	GUK1, GPX1, PAICS, TXNRD1, NME2, CAT, RRM1, DCTD, NME1, PNP, RRM2, IMPDH2, ADSL, TK1, AK1, TYMS, UMPS, CAD, HPRT1, APRT, UPP1, DTYMK, DCK, DGUOK, NT5E, ADK, IMPDH1, GMPR, TK2, ADA, DPYD, TYMP, CDA, GSR, AK2, AMPD1, GLRX, AMPD3, ATIC, TXN, DUT, NT5C2, PPAT, UCK2, GART, XDH, AMPD2, NME4, PFAS, GMPS, DHODH, CMPK1, GMPR2, CTPS2, NT5C, UPB1, ADSS
REACTOME_INTERFERON_GAMMA_SIGNALING	42	0.437634	0.184533	0.680448	0.000877278	0.00240694	STAT1, IFNGR2, JAK1, B2M, GBP1, IRF1, PRKCD, IRF6, IRF3, ICAM1, PTPN1, IFNGR1, GBP2, SP100, OAS1, IRF2, VCAM1, IRF9, IRF8, CD44, IRF4, PTPN2, OAS2, CIITA, IRF5, OASL, JAK2, PTAFR, SOCS3, PML, PTPN6, IRF7, SUMO1, CAMK2B, SOCS1, IFNG, MT2A, NCAM1, FCGR1B, FCGR1A, PIAS1, OAS3
REACTOME_SOS_MEDIATED_SIGNALLING	14	-0.341111	0.535763	0.150206	0.000886295	0.00242654	RAF1, MAP2K2, NRAS, MAP2K1, CDK1, KRAS, IRS1, MAPK1, YWHAB, IRS2, MAPK3, SOS1, HRAS, GRB2
KEGG_ENDOMETRIAL_CANCER	48	0.271543	0.112607	0.424021	0.000890003	0.00243155	BAD, CTNNA1, CDH1, ILK, RAF1, PIK3R2, CTNNB1, TP53, ARAF, EGFR, MAP2K2, MYC, MLH1, NRAS, MAP2K1, PIK3R3, APC, ELK1, PIK3CD, CASP9, KRAS, PTEN, FOXO3, PIK3CA, PDPK1, TCF7, APC2, BRAF, EGF, PIK3CG, AKT1, MAPK1, CCND1, GSK3B, ERBB2, LEF1, SOS2, MAPK3, PIK3R1, AKT3, PIK3CB, TCF7L2, SOS1, AXIN1, HRAS, GRB2, PIK3R5, TCF7L1
REACTOME_PHASE1_FUNCTIONALIZATION_OF_COMPOUNDS	45	0.356477	0.151815	0.565426	0.000894517	0.00243873	CYP2E1, ALDH2, CYP51A1, CYP1B1, CYP19A1, CYP27A1, MAOB, MAOA, PTGS2, CYP2J2, PTGS1, FMO1, CYP27B1, CYP1A1, CYP3A5, CYP3A4, FMO3, CYP24A1, CYP4F3, CYP4F12, CYP2B6, CYP7B1, CYP2D6, CYP1A2, CYP2R1, ADH1A, CYP2C18, TBXAS1, PTGIS, ADH1B, CYP4B1, SMOX, CYP4F2, ADH7, CYP4F8, FMO2, ALDH1A1, ADH6, CYP2C9, CYP21A2, CYP11B2, CYP26B1, CYP39A1, CYP2W1, PAOX
BIOCARTA_CARDIACEGF_PATHWAY	18	-0.46133	0.735021	0.198755	0.000900095	0.00244729	RHOA, JUN, RELA, EGFR, MYC, PLCG1, AGT, ADAM12, EDNRB, EDNRA, AGTR1, EGF, PRKCB, FOS, NFKB1, HRAS, PRKCA, EDN1
REACTOME_SULFUR_AMINO_ACID_METABOLISM	21	-0.470751	0.736388	0.199551	0.000901433	0.00244729	MAT2A, AHCY, GCLC, MTR, GCLM, ETHE1, SUOX, CDO1, MTAP, MAT1A, GOT1, TST, CTH, CNDP2, ADI1, ENOPH1, MAT2B, SQRDL, SLC25A10, APIP, CSAD
BIOCARTA_SALMONELLA_PATHWAY	13	0.425151	0.186274	0.66724	0.000923107	0.00249638	ACTR2, ARPC1A, ACTR3, ARPC1B, ACTA1, WASF1, WASL, ARPC2, RAC1, CDC42, ARPC3, ARPC4, ARPC5
REACTOME_YAP1_AND_WWTR1_TAZ_STIMULATED_GENE_EXPRESSION	20	0.292762	0.122692	0.455924	0.00092337	0.00249638	TBL1X, WWTR1, CREBBP, RXRA, MED1, KAT2B, SMARCD3, TEAD4, NCOA2, NCOA3, NCOA6, CTGF, NCOA1, TEAD3, NPPA, PPARA, YAP1, TEAD1, TGS1, TBL1XR1
REACTOME_RESPIRATORY_ELECTRON_TRANSPORT_ATP_SYNTHESIS_BY_CHEMIOSMOTIC_COUPLING_AND_HEAT_PRODUCTION_BY_UNCOUPLING_PROTEINS_	72	-0.328766	0.525692	0.139846	0.000936114	0.00252556	COX4I1, ATP5O, UQCRC2, COX6A1, CYC1, SDHA, COX8A, COX7C, NDUFB8, COX7A2L, NDUFA5, ATP5B, COX6B1, UQCRQ, NDUFS3, COX6C, NDUFS5, UQCRC1, ETFA, NDUFS2, NDUFA6, SDHC, SDHD, NDUFAB1, UQCR11, COX7B, UQCRH, NDUFA1, ATP5J, COX5B, SDHB, NDUFA7, NDUFB7, NDUFV2, ETFB, ATP5J2, NDUFS1, NDUFB3, NDUFC1, NDUFS6, NDUFB6, NDUFB5, COX5A, ATP5D, ETFDH, ATP5C1, UQCRB, NDUFB1, ATP5I, UCP3, ATP5L, NDUFV1, CYCS, UQCRFS1…
REACTOME_PIP3_ACTIVATES_AKT_SIGNALING	22	0.320167	0.132186	0.500507	0.000941426	0.00253461	BAD, GSK3A, CDKN1A, NR4A1, FOXO1, RPS6KB2, CASP9, PTEN, FOXO3, CREB1, PDPK1, FOXO4, AKT1, CDKN1B, CHUK, AKT3, PHLPP1, TSC2, MDM2, MAPKAP1, TRIB3, MLST8
KEGG_ADIPOCYTOKINE_SIGNALING_PATHWAY	53	0.269633	0.118993	0.423424	0.000985818	0.00264862	TRADD, SLC2A1, ADIPOR2, NFKBIA, ACSL3, RELA, PRKAG1, PRKAB1, ACSL1, ACSL4, RXRA, PCK2, MAPK9, TNFRSF1B, CPT1A, NFKBIE, STK11, TRAF2, IRS1, MAPK10, JAK2, PTPN11, SOCS3, CD36, G6PC, LEP, TNF, AKT1, ADIPOQ, LEPR, IRS4, TNFRSF1A, PCK1, STAT3, RXRB, IRS2, NFKB1, IKBKB, CHUK, PRKAA1, IKBKG, PRKCQ, CPT1B, PPARA, CAMKK2, AKT3, NFKBIB, PRKAB2, PRKAG2, ADIPOR1, ACSL5, PPARGC1A, ACACB
BIOCARTA_TNFR1_PATHWAY	27	-0.219877	0.349714	0.0927034	0.00100452	0.00269035	TRADD, ARHGDIB, JUN, FADD, CASP3, RB1, MAP2K4, LMNB1, DFFA, LMNA, TRAF2, DFFB, MAP3K7, TNF, TNFRSF1A, CASP8, SPTAN1, PARP1, PRKDC, PAK2, PAK1, CRADD, RIPK1, MADD, MAP3K1, LMNB2, BAG4
BIOCARTA_FMLP_PATHWAY	31	0.285056	0.119162	0.454427	0.00100551	0.00269035	CALM2, GNB1, RAF1, NFKBIA, RELA, MAP2K2, PPP3CA, PPP3CB, MAPK14, MAP2K1, ELK1, CAMK1, FPR1, GNA15, MAP2K6, NFATC4, PPP3CC, NFATC3, MAP2K3, NFATC1, MAPK1, RAC1, NFKB1, PAK1, NCF2, PLCB1, MAPK3, HRAS, CALM1, MAP3K1, PIK3C2G
KEGG_NON_HOMOLOGOUS_END_JOINING	12	0.220439	0.0918147	0.346585	0.00104276	0.00278428	XRCC6, FEN1, XRCC4, MRE11A, LIG4, RAD50, XRCC5, PRKDC, NHEJ1, DCLRE1C, POLL, POLM
BIOCARTA_MAL_PATHWAY	18	-0.316786	0.501903	0.13523	0.00105943	0.00282296	RHOA, RAF1, SRF, MAP2K2, MAP2K1, ACTA1, LIMK1, MAL, MAP4K2, MAPK1, RAC1, CDC42, DIAPH1, HNF1A, MAPK3, HRAS, ROCK1, MAP3K1
REACTOME_OXYGEN_DEPENDENT_PROLINE_HYDROXYLATION_OF_HYPOXIA_INDUCIBLE_FACTOR_ALPHA	13	-0.330946	0.522115	0.13791	0.00113375	0.00301082	TCEB2, UBE2D3, EPAS1, HIF1A, UBE2D2, TCEB1, CUL2, UBE2D1, RBX1, EGLN3, HIF3A, EGLN2, EGLN1
REACTOME_NEUROTRANSMITTER_RELEASE_CYCLE	19	0.259799	0.106041	0.411512	0.00113458	0.00301082	VAMP2, STXBP1, SNAP25, UNC13B, GLS, ALDH5A1, SLC17A7, MAOA, RAB3A, SLC6A1, GLS2, SLC18A2, GAD2, SLC1A6, SLC6A11, ABAT, SYN2, SLC1A1, SLC38A2
SIG_IL4RECEPTOR_IN_B_LYPHOCYTES	26	0.316046	0.128764	0.495721	0.00115066	0.00304724	BAD, RAF1, STAT6, SHC1, JAK1, GSK3A, IL4R, BCL2, PIK3CD, PIK3CA, PDPK1, IRS1, MAP4K1, AKT1, JAK3, MAPK1, IRS2, GSK3B, SOCS1, SOS2, MAPK3, PIK3R1, AKT3, SOS1, GRB2, PPP1R13B
PID_HDAC_CLASSIII_PATHWAY	21	0.30892	0.147141	0.467388	0.0011638	0.00307575	XRCC6, TUBA1B, TP53, CREBBP, EP300, CDKN1A, FOXO1, FHL2, MEF2D, KAT2B, FOXO3, TUBB2A, HDAC4, FOXO4, BAX, HOXA10, SIRT7, SIRT1, PPARGC1A, SIRT2, SIRT3
KEGG_APOPTOSIS	77	0.17586	0.0708341	0.283088	0.00119253	0.00313774	TRADD, BAD, PRKAR1A, CAPN1, PIK3R2, NFKBIA, IRAK1, TP53, RELA, BIRC2, PPP3CA, PPP3CB, FADD, TNFSF10, PRKACB, PIK3R3, CASP3, PRKACA, IL1R1, DFFA, PRKAR2B, BCL2, PIK3CD, CASP9, PRKX, PIK3CA, TRAF2, BID, PPP3R1, FAS, ENDOG, PRKAR2A, APAF1, IL1B, CSF2RB, MAP3K14, IL1RAP, CASP10, AIFM1, EXOG, IL3RA, CHP2, PIK3CG, BCL2L1, DFFB, PPP3CC, TNF, AKT1, CASP7, PRKACG, TNFRSF1A, CASP8, IL1A, ATM, BAX, CFLAR, C…
REACTOME_MTORC1_MEDIATED_SIGNALLING	8	0.388973	0.16197	0.61254	0.00119374	0.00313774	RPS6, EIF4E, RHEB, RPS6KB1, EIF4G1, EIF4B, MLST8, EIF4EBP1
KEGG_CYSTEINE_AND_METHIONINE_METABOLISM	27	-0.208239	0.328182	0.0857849	0.00119661	0.00313774	LDHA, GOT2, MAT2A, AHCYL1, AHCY, LDHB, AMD1, SRM, DNMT1, SMS, MPST, MTR, CDO1, MTAP, SDS, MAT1A, TRDMT1, TAT, LDHC, GOT1, AHCYL2, CTH, ADI1, ENOPH1, MAT2B, APIP, DNMT3B
ST_WNT_CA2_CYCLIC_GMP_PATHWAY	14	0.396559	0.171423	0.61259	0.00119695	0.00313774	ITPR3, CFB, ITPR2, TF, ITPR1, ITPKB, PDE6D, DAG1, ITPKA, PDE6A, NFAT5, CAMK2B, PDE6B, CAMK2G
REACTOME_GROWTH_HORMONE_RECEPTOR_SIGNALING	20	0.246572	0.101072	0.388231	0.00120861	0.00316192	STAT1, LYN, PTPN1, STAT5A, SOCS2, IRS1, STAT5B, GHR, ADAM17, JAK2, SOCS3, PTPN6, MAPK1, STAT3, IRS2, SH2B1, SOCS1, PRLR, MAPK3, CISH
REACTOME_CHONDROITIN_SULFATE_BIOSYNTHESIS	15	-0.275341	0.43787	0.111566	0.00122384	0.00318908	BGN, DCN, CHPF, CHSY1, CHST15, VCAN, CSPG4, CHST7, CHST3, CSGALNACT2, CHST12, CSGALNACT1, BCAN, CHST11, CHPF2
KEGG_DNA_REPLICATION	33	-0.271127	0.432577	0.108098	0.00122392	0.00318908	RFC2, POLD2, PCNA, RPA1, MCM3, MCM5, RPA2, MCM6, MCM2, SSBP1, LIG1, POLD4, RNASEH2A, RFC5, POLD1, RFC4, RFC3, POLA2, FEN1, POLA1, PRIM1, PRIM2, POLE2, RFC1, MCM7, POLE3, RPA3, MCM4, POLD3, DNA2, RNASEH2B, POLE, RNASEH1
BIOCARTA_ACH_PATHWAY	12	-0.290496	0.464344	0.119284	0.00125643	0.00326723	BAD, YWHAH, PTK2B, FOXO3, PIK3CA, PIK3CG, AKT1, PTK2, FASLG, PIK3R1, SRC, CHRNG
PID_RHOA_REG_PATHWAY	39	0.193202	0.0784818	0.310326	0.0012605	0.00327123	RHOA, ARHGDIA, ARHGDIB, ARHGEF12, NET1, FARP1, ARHGAP35, BCR, ARHGEF11, ARHGEF1, ARHGEF17, ARHGAP4, ARHGEF5, ARHGEF15, VAV2, ARHGAP8, ARHGAP6, VAV1, OPHN1, ARHGEF2, TRIO, AKAP13, CDKN1B, DLC1, ARAP1, ABR, MCF2L, ARHGEF18, MYO9B, ARHGEF10, ARHGAP5, ARHGEF3, VAV3, ARAP3, ECT2, PLEKHG6, OBSCN, DEF6, ARHGEF10L
REACTOME_CELL_CELL_COMMUNICATION	83	-0.278881	0.444434	0.109855	0.00127011	0.00328959	ACTN4, SPTBN1, CTNNA1, IQGAP1, JUP, CDH1, ILK, PLEC, PIK3R2, CLDN4, CTNNB1, RSU1, VASP, LAMC2, MAPK14, CLDN7, SIRPA, PTK2B, CDH3, NCK2, CDH2, CD2AP, LAMA3, ACTN2, CLDN3, TESK1, TYROBP, CD151, SKAP2, PIK3CA, CLDN5, PARVB, COL17A1, CDH5, NCK1, CDH13, ITGB4, FYB, CLDN10, CDH6, WASL, PTPN6, SIRPB1, CDH12, CDH11, LIMS1, MAGI2, PTK2, FLNC, CTNND1, SPTAN1, ACTN1, RAC1, CADM1, FERMT2, LAMB3, ARHGEF6, PAK…
BIOCARTA_MYOSIN_PATHWAY	28	0.206415	0.0826456	0.325154	0.00127588	0.00329756	GNB1, ARHGEF12, PPP1R12B, PKN1, ARHGEF7, MYLK, GNAQ, ARHGEF11, ARHGEF1, ARHGEF9, ARHGEF17, ARHGEF5, ARHGEF4, ARHGEF15, GNA13, ARHGEF2, PRKCB, ARHGEF16, ARHGEF6, MYL2, PLCB1, ARHGEF18, ROCK1, PRKCA, ARHGEF10, ARHGAP5, ARHGEF3, GNA12
PID_AR_NONGENOMIC_PATHWAY	29	0.270099	0.109565	0.433998	0.00127828	0.00329756	GNB1, GNAI2, GNAI3, RAF1, MAP2K2, MAP2K1, PLCG1, PLCB2, CREB1, PIK3CA, PLCG2, GNAO1, GNAZ, AKT1, PTK2, GNRH1, MAPK1, RAC1, CDC42, FOS, GNAI1, AR, PLCB1, MAPK3, PIK3R1, HRAS, SRC, PLCB3, PELP1
REACTOME_ACYL_CHAIN_REMODELLING_OF_PI	10	-0.423832	0.664639	0.192772	0.00129849	0.00334304	PLA2G2A, PLA2G5, MBOAT7, PLA2G16, PLA2G4C, PLA2G4A, PLBD1, PLA2G2D, PLA2G12A, PLA2G2F
KEGG_ASCORBATE_AND_ALDARATE_METABOLISM	10	0.34664	0.137972	0.552143	0.00139323	0.00357983	ALDH2, ALDH9A1, ALDH3A2, UGDH, UGT1A4, UGT1A1, UGT2A1, ALDH7A1, ALDH1B1, UGT2B28
REACTOME_VEGF_LIGAND_RECEPTOR_INTERACTIONS	9	0.30889	0.123683	0.497975	0.00147597	0.00378492	VEGFB, KDR, FIGF, VEGFC, NRP1, VEGFA, NRP2, PDGFC, FLT1
KEGG_GLYCOSAMINOGLYCAN_BIOSYNTHESIS_KERATAN_SULFATE	11	-0.467372	0.710326	0.221166	0.00148961	0.00380485	B4GALT1, CHST2, FUT8, CHST1, ST3GAL1, B4GALT2, B4GALT3, B4GALT4, ST3GAL2, B3GNT2, CHST4
REACTOME_NEP_NS2_INTERACTS_WITH_THE_CELLULAR_EXPORT_MACHINERY	25	0.213705	0.087261	0.342799	0.00148962	0.00380485	RAN, RAE1, RANBP2, TPR, NUP153, NUP62, NUP214, NUP133, NUP93, NUP88, NUPL2, POM121, NUP155, XPO1, NUP205, NUP210, NUP188, NUP50, NUP85, AAAS, NUP54, NUP37, NUP107, NUP43, SEH1L
PID_AURORA_B_PATHWAY	34	0.408246	0.158466	0.647872	0.00149631	0.00381441	RHOA, NCL, PPP1CC, STMN1, TACC1, CUL3, VIM, PSMA3, SMC4, NCAPD2, BIRC5, DES, PPP2R5D, MYLK, RASA1, AURKA, NDC80, SMC2, KIF23, CENPA, PEBP1, EVI5, KIF2C, AURKB, BUB1, CBX5, AURKC, NCAPH, KLHL9, NCAPG, KIF20A, CDCA8, NPM1, RACGAP1
REACTOME_DOWNREGULATION_OF_TGF_BETA_RECEPTOR_SIGNALING	18	0.233386	0.0921318	0.372497	0.00151921	0.00386519	PPP1CC, PPP1CA, STRAP, PPP1CB, PPP1R15A, SMAD2, SMAD7, ZFYVE9, SMAD3, SMURF2, TGFBR1, TGFBR2, XPO1, MTMR4, SMURF1, PMEPA1, STUB1, UCHL5
REACTOME_PROCESSING_OF_CAPPED_INTRONLESS_PRE_MRNA	18	0.193547	0.0752901	0.30868	0.00155098	0.00393828	NCBP2, PABPN1, CSTF1, SNRPD3, NUDT21, SNRPE, PCF11, SNRPF, CSTF3, CLP1, CSTF2, SNRPG, SLBP, SNRPB, PAPOLA, NCBP1, ZNF473, CPSF7
KEGG_O_GLYCAN_BIOSYNTHESIS	15	0.22903	0.0902151	0.366501	0.00156293	0.00396086	GALNT1, GALNT3, GCNT1, GALNT10, ST3GAL1, ST3GAL2, GALNT2, GALNT7, GALNT12, GALNT11, GALNT14, C1GALT1C1, C1GALT1, GALNT6, B4GALT5
KEGG_GLYCOSYLPHOSPHATIDYLINOSITOL_GPI_ANCHOR_BIOSYNTHESIS	19	0.207961	0.0818262	0.33242	0.00156655	0.00396227	GPAA1, PIGC, PIGQ, PIGF, PIGA, PIGB, PIGL, GPLD1, DPM2, PIGH, PIGK, PIGO, PGAP1, PIGT, PIGG, PIGN, PIGV, PIGZ, PIGP
PID_P75_NTR_PATHWAY	58	0.189432	0.0767442	0.297545	0.00158011	0.00398877	BAD, RHOA, APP, RHOC, ARHGDIA, SHC1, SQSTM1, IRAK1, TP53, FURIN, BIRC2, PRKCZ, PRKACB, CASP3, MAPK9, PSEN1, CASP9, MMP7, PIK3CA, MAPK10, APAF1, ZNF274, TRAF6, SMPD2, ADAM17, MMP3, NGFR, BDNF, NTF3, OMG, AKT1, RAC1, NCSTN, CYCS, MAGED1, MYD88, IKBKB, RIPK2, NDN, CHUK, PRKCI, CASP6, IKBKG, YWHAE, BIRC3, RTN4, RHOB, PIK3R1, SORT1, MAG, PSENEN, PRDM4, BEX1, APH1A, MAGEH1, DIABLO, APH1B, BCL2L11
REACTOME_FORMATION_OF_INCISION_COMPLEX_IN_GG_NER	18	0.157466	0.0608836	0.251498	0.0016311	0.00410947	RAD23B, RPA1, RPA2, ERCC3, ERCC5, GTF2H1, DDB2, MNAT1, GTF2H4, ERCC1, CCNH, XPA, DDB1, XPC, RPA3, CDK7, GTF2H2B, GTF2H3
BIOCARTA_HER2_PATHWAY	21	0.371	0.148326	0.598335	0.00165641	0.00416515	RAF1, SHC1, EGFR, EP300, ERBB3, MAP2K1, PIK3CA, IL6ST, IL6, ESR1, IL6R, PIK3CG, ERBB4, MAPK1, STAT3, MAPK3, PIK3R1, CARM1, SOS1, HRAS, GRB2
REACTOME_TRANSPORT_TO_THE_GOLGI_AND_SUBSEQUENT_MODIFICATION	29	-0.254815	0.409428	0.0981174	0.00167372	0.00420053	SEC31A, MGAT1, B4GALT1, ST6GAL1, SEC24C, SEC24D, SEC24B, MGAT2, LMAN1, FUT8, SEC23A, MAN2A1, B4GALT6, SEC13, MAN1A1, B4GALT2, MGAT3, B4GALT3, B4GALT4, MGAT5, MCFD2, MAN1C1, MAN1A2, PREB, SAR1B, MANEA, MGAT4A, MGAT4B, B4GALT5
PID_FRA_PATHWAY	32	0.284031	0.111152	0.449893	0.00175263	0.00439004	MMP2, JUN, JUNB, GJA1, DCN, USF2, EP300, MGP, COL1A2, DMTF1, CCNA2, HMOX1, LAMA3, JUND, THBD, MMP9, FOSL1, MMP1, ITGB4, IL6, LIF, FOSL2, PLAU, CDKN2A, NFATC3, NFATC1, CCND1, PLAUR, IVL, SP1, CCL2, TXLNG
REACTOME_INTERACTIONS_OF_VPR_WITH_HOST_CELLULAR_PROTEINS	30	0.179675	0.0688114	0.286032	0.00176225	0.00440563	SLC25A5, RAE1, RANBP2, TPR, KPNA1, NUP153, NUP62, NUP214, NUP133, NUP93, SLC25A4, NUP88, NUPL2, POM121, PSIP1, HMGA1, NUP155, BANF1, SLC25A6, NUP205, NUP210, NUP188, NUP50, NUP85, AAAS, NUP54, NUP37, NUP107, NUP43, SEH1L
PID_EPHRINB_REV_PATHWAY	26	0.182388	0.0729246	0.287411	0.00177619	0.00443193	LYN, EFNB2, EFNB1, EPHB4, YES1, MAP2K4, NCK2, RGS3, PTPN13, PIK3CA, ITGB3, LCK, BLK, TIAM1, ITGA2B, MAP3K7, HCK, FGR, RAC1, CXCR4, EPHB2, FYN, PIK3R1, SRC, DNM1, FGG
REACTOME_CDT1_ASSOCIATION_WITH_THE_CDC6_ORC_ORIGIN_COMPLEX	50	0.179147	0.0666416	0.288676	0.00186177	0.00463652	PSMB2, PSMB7, PSME1, PSMD8, PSMD2, PSMB1, PSMD4, PSMF1, PSMC2, PSMA7, PSMD1, PSMD13, PSMC4, PSMC3, PSMA5, PSMA2, PSMD3, PSMB3, PSMA3, PSMA1, PSMC6, PSMD7, PSME2, PSMB4, PSMD12, PSMB10, PSMA6, PSMD6, ORC4, PSMA4, PSMD5, CDC6, PSMC1, PSMB9, ORC2, ORC5, ORC1, PSMD9, PSMD11, PSMB5, PSMB6, PSMB8, PSMC5, CDT1, ORC3, PSME4, PSMD14, GMNN, ORC6, PSMD10
KEGG_BETA_ALANINE_METABOLISM	18	-0.453275	0.732273	0.181628	0.00189987	0.00472232	ECHS1, ALDH2, SRM, ALDH9A1, SMS, ALDH3A2, ACADM, HIBCH, DPYD, AOC3, EHHADH, GAD2, HADHA, ALDH7A1, ABAT, ALDH1B1, MLYCD, UPB1
KEGG_GLYCOSPHINGOLIPID_BIOSYNTHESIS_GLOBO_SERIES	11	0.288301	0.111902	0.466051	0.00193445	0.00479907	HEXA, HEXB, NAGA, FUT1, ST3GAL1, FUT2, ST8SIA1, B3GALNT1, GLA, ST3GAL2, A4GALT
REACTOME_INHIBITION_OF_INSULIN_SECRETION_BY_ADRENALINE_NORADRENALINE	15	0.314137	0.123142	0.509128	0.00196307	0.00486076	GNB1, GNB2, GNAI2, GNG10, GNB5, GNG11, GNAO1, GNG7, GNG5, CACNB2, ADCY6, CACNB3, GNAI1, ADRA2A, GNG12
REACTOME_PROCESSIVE_SYNTHESIS_ON_THE_LAGGING_STRAND	15	-0.243569	0.394732	0.0909274	0.00202417	0.00500249	POLD2, PCNA, RPA1, RPA2, LIG1, POLD4, POLD1, POLA2, FEN1, POLA1, PRIM1, PRIM2, RPA3, POLD3, DNA2
REACTOME_CLASS_B_2_SECRETIN_FAMILY_RECEPTORS	39	-0.160282	0.259126	0.0593656	0.00205989	0.00508107	GNB1, GNAS, GNB2, GNG10, CD55, ADM, FZD7, FZD6, GNB5, GNG11, FZD1, RAMP1, VIPR1, RAMP3, WNT2, RAMP2, PTH1R, WNT5A, WNT10B, PTHLH, CALCRL, WNT2B, WNT11, GNG7, GNG5, GLP1R, WNT4, PTCH1, GNG12, WNT7B, SMO, FZD4, FZD3, FZD10, WNT16, SCT, FZD5, WNT3, WNT6
REACTOME_TRAFFICKING_AND_PROCESSING_OF_ENDOSOMAL_TLR	10	-0.442843	0.720714	0.176247	0.00207581	0.0051106	HSP90B1, CTSB, LGMN, CTSK, CTSS, TLR3, CNPY3, TLR7, TLR8, UNC93B1
REACTOME_E2F_ENABLED_INHIBITION_OF_PRE_REPLICATION_COMPLEX_FORMATION	9	0.402674	0.154787	0.653896	0.00211873	0.00520636	CDK1, ORC4, CDC25A, ORC2, ORC5, ORC1, ORC3, CCNB1, ORC6
REACTOME_TRANSCRIPTION_COUPLED_NER_TC_NER	40	0.148538	0.0551613	0.240115	0.00216144	0.00530127	RFC2, POLD2, PCNA, RPA1, RPA2, POLR2B, ERCC3, POLR2G, ERCC5, GTF2H1, POLR2L, POLR2K, POLR2A, LIG1, POLD4, RFC5, POLD1, MNAT1, GTF2H4, POLR2D, ERCC1, RFC4, CCNH, RFC3, ERCC8, POLE2, POLR2C, POLR2H, RPA3, POLR2F, CDK7, POLR2J, POLD3, POLR2I, POLR2E, GTF2H2B, POLE, TCEA1, XAB2, GTF2H3
NABA_MATRISOME_ASSOCIATED	406	0.233495	0.0835557	0.377445	0.00220935	0.00540853	CCL5, MMP14, S100A11, CTSA, CTSD, ANXA5, PLOD1, CTSB, S100A10, ANXA6, SERPING1, ANXA1, TGM2, MMP2, ANXA2, LGALS1, TIMP3, HTRA1, CSTB, SDC1, ANXA4, CST3, ANXA7, CTSC, TIMP1, PLAT, PAPPA, ST14, SFRP1, SDC4, CTSL, PLOD3, SERPINF1, CTSH, SERPINA3, ADAM9, IGF2, CTSK, HCFC1, S100A13, ADAM10, PLOD2, SERPINE1, TNFSF10, BMP1, P4HA2, GPC1, SERPINA1, AGT, CXCL8, SDC3, CTSS, FAM20B, S100A8, ADAM12, C1QB, LOX…
BIOCARTA_BAD_PATHWAY	25	-0.240391	0.390186	0.0874561	0.00224442	0.00548401	BAD, PRKAR1A, YWHAH, PRKACB, RPS6KA1, IGF1R, PRKAR2B, BCL2, PIK3CA, PRKAR2A, KIT, CSF2RB, IL3RA, PIK3CG, BCL2L1, KITLG, AKT1, PRKACG, MAPK1, BAX, IGF1, MAPK3, PIK3R1, PRKAR1B, ADCY1
KEGG_CYTOKINE_CYTOKINE_RECEPTOR_INTERACTION	175	0.249577	0.0912317	0.41122	0.00227753	0.00555443	CCL5, IFNGR2, IL13RA1, EGFR, PDGFRB, TNFSF10, IFNGR1, IL1R1, LTBR, CSF1R, PDGFRA, IL4R, TNFRSF1B, MET, CSF3R, CXCL12, VEGFB, CX3CL1, CXCL9, KDR, ACVR1, CCL4, IL2RG, IFNAR1, PDGFB, PLEKHO2, CXCL1, CXCL10, CCL21, IL11RA, FAS, IFNAR2, BMPR1A, IL6ST, IL10RA, TNFRSF11B, KIT, IL1B, CCR1, CCL3L1, CD40, CSF2RB, IL6, ACVR1B, IL1RAP, CXCL13, INHBB, LIF, BMP2, IL2RB, ACVR2A, CCL14, IL1R2, PDGFA, CCL20, GHR,…
KEGG_TYPE_I_DIABETES_MELLITUS	18	0.501754	0.202387	0.788992	0.00228791	0.00556925	HSPD1, CPE, PTPRN2, ICA1, FAS, PTPRN, IL1B, CD86, CD28, GAD2, LTA, TNF, IL12B, IL1A, GZMB, IFNG, FASLG, PRF1
PID_TRKR_PATHWAY	55	-0.133964	0.218053	0.0481114	0.00234355	0.005694	RHOA, RAP1B, SHC1, SQSTM1, DYNLT1, ABL1, PRKCZ, CRK, RAP1A, NRAS, MAP2K1, RASA1, PLCG1, RHOG, DOCK1, ARHGAP32, GAB2, KRAS, RGS19, PIK3CA, ELMO1, NGFR, PTPN11, DNAJA3, CRKL, MATK, SHC3, BDNF, TIAM1, NTRK3, NTF3, GAB1, NTRK2, GIPC1, MAPK1, RAC1, CCND1, CDC42, STAT3, MAGED1, SH2B1, EHD4, PRKCI, RIT1, MAPK3, PIK3R1, NEDD4L, SOS1, MCF2L, HRAS, SHC2, GRB2, DNM1, FAIM, FRS2
KEGG_FOCAL_ADHESION	174	-0.186511	0.310775	0.0672907	0.00241803	0.00586396	BAD, RHOA, ACTN4, PPP1CC, LAMC1, ACTB, ZYX, RAP1B, PPP1CA, FLNA, VCL, CCND2, MYL9, PXN, THBS1, ITGB5, ILK, RAF1, MYL12A, ITGA5, PPP1CB, PIK3R2, COL6A3, JUN, SHC1, ITGA3, LAMB1, CTNNB1, PPP1R12A, TNC, ITGA6, CCND3, COL3A1, EGFR, ARHGAP35, BIRC2, VWF, LAMA4, VASP, CRK, LAMC2, PDGFRB, COL1A1, ITGAV, RAP1A, COL1A2, MYLK, MAP2K1, PIK3R3, ROCK2, CAV1, THBS2, PDGFRA, PAK4, DOCK1, MAPK9, TLN1, CAV2, COL5…
REACTOME_DESTABILIZATION_OF_MRNA_BY_BRF1	13	0.149802	0.0549522	0.245255	0.00242727	0.00587536	MAPKAPK2, EXOSC9, AKT1, YWHAB, EXOSC2, ZFP36L1, EXOSC7, DCP2, DIS3, EXOSC8, EXOSC5, DCP1A, EXOSC4
REACTOME_SYNTHESIS_OF_GLYCOSYLPHOSPHATIDYLINOSITOL_GPI	13	0.185033	0.067674	0.301499	0.00245512	0.00593169	PIGC, PIGQ, PIGF, PIGA, PIGB, PIGL, DPM2, PIGH, PIGO, PIGG, PIGN, PIGV, PIGP
REACTOME_NCAM1_INTERACTIONS	28	-0.237544	0.394164	0.0872866	0.00246359	0.00594106	PRNP, COL6A3, COL3A1, COL1A1, COL1A2, COL5A1, COL9A3, GFRA1, CACNA1H, CACNB1, CACNB4, CACNB2, COL6A2, CACNB3, ARTN, CACNA1G, NRTN, COL4A2, COL4A1, COL6A1, AGRN, NCAM1, COL4A5, COL9A2, COL4A4, CACNA1S, GFRA4, COL5A2
REACTOME_IL_6_SIGNALING	9	0.447606	0.172086	0.726826	0.00248975	0.00598973	STAT1, JAK1, IL6ST, IL6, TYK2, JAK2, IL6R, SOCS3, STAT3
REACTOME_DCC_MEDIATED_ATTRACTIVE_SIGNALING	11	-0.269347	0.438004	0.0993982	0.00249302	0.00598973	ABLIM1, DOCK1, NCK1, ABLIM3, WASL, PTK2, TRIO, RAC1, CDC42, FYN, SRC
PID_CXCR4_PATHWAY	88	0.234189	0.0823275	0.37988	0.00254983	0.00611487	BAD, CFL1, RHOA, GNB1, RAP1B, RHOC, STAT1, GNAI2, PXN, GNAI3, ITGA5, PIK3R2, ITGA3, ITGA6, RALB, PRKCZ, CRK, CSK, ITGAV, LYN, FOXO1, PIK3R3, GRK6, YES1, RGS1, STAT5A, PTK2B, INPP5D, ARRB2, CD4, CXCL12, PIK3CD, MMP9, PLCB2, PTEN, LIMK1, PIK3CA, PDPK1, GNAO1, LCK, GNAZ, STAT5B, ITGA2, STAT2, CD3E, JAK2, PTPN11, ITGA4, VAV1, BLK, PIK3CG, PTPN6, ITGA10, CD3G, GNA13, AKT1, PTPRC, PTK2, HCK, FGR, RAC1,…
REACTOME_S_PHASE	102	0.165283	0.0572662	0.268905	0.00261736	0.00625675	RFC2, PSMB2, SKP1, PSMB7, PSME1, PSMD8, PSMD2, PSMB1, PSMD4, PSMF1, PSMC2, PSMA7, POLD2, PSMD1, PCNA, PSMD13, PSMC4, PSMC3, PSMA5, PSMA2, PSMD3, PSMB3, RPA1, PSMA3, MCM3, PSMA1, PSMC6, PSMD7, MCM5, RPA2, PSME2, CDC25B, CKS1B, MCM6, MCM2, PSMB4, CDK4, CDKN1A, PSMD12, MYC, PSMB10, PSMA6, LIG1, PSMD6, POLD4, RB1, RFC5, ORC4, PSMA4, CCNA2, POLD1, PSMD5, MNAT1, SKP2, CDC6, RFC4, CCNH, CDC45, RFC3, PSM…
BIOCARTA_AHSP_PATHWAY	9	-0.756422	1.22399	0.285894	0.00261865	0.00625675	UROS, HMBS, FECH, HBA1, CPOX, ALAS1, UROD, HBB, ALAD
REACTOME_CYTOCHROME_P450_ARRANGED_BY_SUBSTRATE_TYPE	30	0.486835	0.173508	0.787442	0.00266913	0.0063656	CYP2E1, CYP51A1, CYP1B1, CYP19A1, CYP27A1, CYP2J2, CYP27B1, CYP1A1, CYP3A5, CYP3A4, CYP24A1, CYP4F3, CYP4F12, CYP2B6, CYP7B1, CYP2D6, CYP1A2, CYP2R1, CYP2C18, TBXAS1, PTGIS, CYP4B1, CYP4F2, CYP4F8, CYP2C9, CYP21A2, CYP11B2, CYP26B1, CYP39A1, CYP2W1
REACTOME_HS_GAG_BIOSYNTHESIS	17	0.273528	0.0988678	0.451846	0.00275848	0.00656661	SDC1, HSPG2, EXT1, EXT2, SDC4, NDST1, GPC1, SDC3, HS2ST1, NDST2, GPC4, GPC3, SDC2, AGRN, GLCE, HS3ST2, HS3ST3A1
SA_B_CELL_RECEPTOR_COMPLEXES	24	-0.323854	0.53578	0.117521	0.00282474	0.006712	JUN, SHC1, PAPPA, BCR, LYN, MAP2K1, RPS6KA1, ELK1, RPS6KA3, ATF2, VAV2, VAV1, SYK, BLNK, MAPK1, RAC1, FOS, MAPK3, SOS1, HRAS, MAPK8IP3, MAP3K1, GRB2, VAV3
REACTOME_GAB1_SIGNALOSOME	30	0.259865	0.0889111	0.423868	0.00293707	0.00696612	BAD, EGFR, GSK3A, CDKN1A, CSK, NR4A1, FOXO1, RPS6KB2, CASP9, PTEN, FOXO3, CREB1, PIK3CA, PDPK1, FOXO4, EGF, GAB1, AKT1, CDKN1B, CHUK, PIK3R1, AKT3, PHLPP1, SRC, GRB2, TSC2, MDM2, MAPKAP1, TRIB3, MLST8
KEGG_ALZHEIMERS_DISEASE	138	-0.141416	0.237069	0.0496479	0.00294261	0.0069665	BAD, COX4I1, APP, CALM2, CAPN1, LRP1, ATP5O, UQCRC2, COX6A1, CYC1, SDHA, COX8A, COX7C, ITPR3, NDUFB8, COX7A2L, NDUFA5, ATP5B, COX6B1, UQCRQ, COX7A2, NDUFS3, COX6C, NDUFS5, UQCRC1, NDUFS2, NDUFA6, SDHC, SDHD, NDUFAB1, UQCR11, COX7B, UQCRH, NAE1, HSD17B10, NDUFA1, ATP5J, COX5B, PPP3CA, PPP3CB, FADD, ADAM10, GNAQ, APBB1, ITPR2, SDHB, CASP3, NDUFA7, NDUFB7, NDUFV2, NDUFS1, IDE, NDUFB3, APOE, MME, PSE…
PID_HIF2PATHWAY	31	0.227126	0.0797891	0.377551	0.00296283	0.00700158	MMP14, TCEB2, PGK1, EPAS1, BHLHE40, SLC2A1, EFNA1, CREBBP, EP300, SERPINE1, TCEB1, SLC11A2, ELK1, KDR, ADORA2A, FXN, CITED2, EIF3E, ABCG2, APEX1, VEGFA, ARNT, TWIST1, SP1, EPO, HIF1AN, SIRT1, EGLN3, EGLN2, EGLN1, FLT1
PID_MAPK_TRK_PATHWAY	33	0.185651	0.0649276	0.308905	0.00307385	0.00725071	RAP1B, RAF1, MAPKAPK2, EGR1, RAP1A, SRF, MAPK14, PRKCD, NRAS, MAP2K1, RPS6KA1, ELK1, KRAS, CDK5, CREB1, RPS6KA5, MAP2K5, CDK5R1, MAP2K6, BRAF, NTF3, RUSC1, MAPK7, MAP2K3, MEF2C, MAPK1, FOS, EHD4, RIT1, MAPK3, HRAS, TRPV1, MAP3K2
REACTOME_SCF_BETA_TRCP_MEDIATED_DEGRADATION_OF_EMI1	46	0.206223	0.0698537	0.338987	0.00310659	0.00731461	PSMB2, SKP1, PSMB7, PSME1, PSMD8, PSMD2, PSMB1, PSMD4, PSMF1, PSMC2, PSMA7, PSMD1, PSMD13, PSMC4, PSMC3, PSMA5, PSMA2, PSMD3, PSMB3, PSMA3, PSMA1, PSMC6, PSMD7, PSME2, PSMB4, PSMD12, PSMB10, PSMA6, PSMD6, CDC20, PSMA4, PSMD5, PSMC1, PSMB9, BTRC, CUL1, PSMD9, PSMD11, PSMB5, PSMB6, PSMB8, PSMC5, PSME4, PSMD14, FBXO5, PSMD10
REACTOME_TRANSPORT_OF_VITAMINS_NUCLEOSIDES_AND_RELATED_MOLECULES	19	0.361526	0.135162	0.583262	0.00312849	0.0073528	SLC29A1, SLC33A1, SLC35A1, SLCO2B1, SLC5A6, SLCO2A1, SLC29A2, SLC35A3, SLC35A2, SLC28A1, SLCO4C1, SLC35D1, SLCO3A1, SLC35D2, SLC35C1, SLC29A3, SLCO4A1, SLC27A6, SLC28A3
KEGG_PROTEASOME	42	0.216109	0.0728633	0.355566	0.00320682	0.00752325	PSMB2, PSMB7, PSME1, PSMD8, PSMD2, PSMB1, PSMD4, PSME3, PSMF1, PSMC2, PSMA7, PSMD1, PSMD13, PSMC4, PSMC3, PSMA5, PSMA2, PSMD3, PSMB3, PSMA3, PSMA1, PSMC6, PSMD7, PSME2, PSMB4, SHFM1, PSMD12, PSMB10, PSMA6, PSMD6, PSMA4, PSMC1, PSMB9, PSMD11, PSMB5, PSMB6, PSMB8, PSMC5, IFNG, PSME4, PSMD14, POMP
REACTOME_THE_ROLE_OF_NEF_IN_HIV1_REPLICATION_AND_DISEASE_PATHOGENESIS	24	-0.307933	0.514722	0.106608	0.0032485	0.00760724	ARF1, AP2B1, AP2M1, B2M, AP2S1, AP1S2, AP1G1, CD4, ELMO1, LCK, AP1S1, AP1B1, CD28, CD8B, HCK, RAC1, PAK2, CD247, FYN, AP2A2, DOCK2, AP1M2, PACS1, ATP6V1H
PID_ILK_PATHWAY	40	-0.153609	0.257469	0.052495	0.00327848	0.0076636	NACA, IQGAP1, ZYX, MYL9, PXN, ILK, RUVBL2, JUN, CTNNB1, PPP1R12A, RUVBL1, ARHGEF7, RHOG, NCK2, AURKA, CREB1, PARVB, GIT2, AKT1, LIMS1, ACTN1, RAC1, PARP1, CCND1, CDC42, XPO1, DIAPH1, ARHGEF6, GSK3B, CDC37, HSP90AA1, ZEB1, PPP1R14B, CKAP5, PARVA, TACC3, TNS1, ELMO2, LIMS2, ILKAP
KEGG_MAPK_SIGNALING_PATHWAY	209	0.0987314	0.0330994	0.165736	0.00341554	0.00796958	HSPA6, STMN1, HSPA1A, HSPA1B, RAP1B, FLNA, DUSP1, RAF1, MAPKAPK2, JUN, DUSP3, CD14, TP53, DAXX, RELA, HSPB1, CDC25B, PPP5C, EGFR, CRK, PDGFRB, NR4A1, RAP1A, SRF, MAP2K2, PPP3CA, MYC, PPP3CB, MAPK14, NRAS, MAP2K1, RASA1, PRKACB, CASP3, MAPKAPK3, PRKACA, IL1R1, RAPGEF2, PDGFRA, MAPK9, MAP2K4, DUSP14, RPS6KA1, ARRB2, MAP3K3, ELK1, FGFR2, PLA2G2A, MAP3K11, GADD45A, JUND, MAP3K5, RPS6KA3, TAB1, MAPT, …
REACTOME_PYRIMIDINE_CATABOLISM	6	-0.562337	0.915708	0.214294	0.00342294	0.0079725	UPP1, NT5E, DPYD, TYMP, NT5C, UPB1
REACTOME_ACYL_CHAIN_REMODELLING_OF_PE	14	-0.245892	0.410854	0.0876214	0.00357084	0.00830204	LPCAT3, PLA2G2A, PLA2G6, PLA2G5, PLA2G16, PLA2G4C, PLA2G4A, LPCAT4, MBOAT2, PLBD1, PLA2G2D, PLA2G3, PLA2G12A, PLA2G2F
BIOCARTA_EGFR_SMRTE_PATHWAY	10	-0.318574	0.528399	0.111382	0.00358236	0.0083139	THRA, EGFR, RXRA, MAPK14, MAP2K1, RARA, ZBTB16, EGF, NCOR2, MAP3K1
REACTOME_CELL_CYCLE_MITOTIC	270	0.178814	0.0577427	0.29497	0.00360704	0.00835541	RFC2, PSMB2, ANAPC5, RAD21, PPP2R1A, DYNLL1, SKP1, MAPRE1, ACTR1A, PPP1CC, RPS27, NUMA1, PSMB7, PAFAH1B1, PSME1, PSMD8, PSMD2, PSMB1, PSMD4, DCTN2, CCND2, PSMF1, PSMC2, DCTN1, PSMA7, POLD2, NUDC, PSMD1, PCNA, HDAC1, PSMD13, PSMC4, PSMC3, PSMA5, PSMA2, PPP2CB, PSMD3, PSMB3, BUB3, RPA1, PSMA3, MCM3, SMC1A, PSMA1, PSMC6, CCND3, PSMD7, MYBL2, RANBP2, TUBG1, MCM5, RPA2, PSME2, CDC25B, PPP2R5C, RRM2, C…
REACTOME_TRANSCRIPTIONAL_REGULATION_OF_WHITE_ADIPOCYTE_DIFFERENTIATION	61	0.275033	0.0941189	0.459735	0.00361315	0.00835541	NCOR1, CCND3, RELA, TBL1X, CCNC, CREBBP, EP300, CDK4, SREBF1, RXRA, MED14, MED1, MED12, LPL, CEBPD, FABP4, SMARCD3, MED7, CDK8, EGR2, NCOA2, PLIN1, WNT10B, CD36, MED22, MED6, LEP, TNF, ADIPOQ, NCOA3, NCOR2, MED25, PCK1, PPARG, NCOA6, NCOA1, NR2F2, KLF5, MED21, PPARA, MED13L, CEBPB, MED20, CDK19, MED24, MED8, MED27, HDAC3, MED4, MED9, MED23, PPARGC1A, TGS1, MED31, MED18, KLF4, ANGPTL4, MED16, TBL1…
REACTOME_FATTY_ACID_TRIACYLGLYCEROL_AND_KETONE_BODY_METABOLISM	134	0.245468	0.0794942	0.404695	0.00364911	0.00842352	ESRRA, ACADVL, NCOR1, HADHB, HADH, ACLY, ECHS1, SREBF2, TXNRD1, ACSL3, LPCAT1, TBL1X, CCNC, ACSL1, WWTR1, CREBBP, EP300, SREBF1, ACADS, ACSL4, RXRA, DECR1, LPIN2, ACADM, HMGCR, MED14, HMGCL, OXCT1, AGT, FHL2, MUT, MED1, ABCA1, MED12, CPT1A, SLC25A20, DGAT1, PCCA, ME1, SMARCD3, NFYA, GLIPR1, ELOVL6, CPT2, TEAD4, MED7, HMGCS2, NRF1, CDK8, CLOCK, GPD1, PEX11A, ACAT1, NPAS2, ALAS1, NCOA2, CYP1A1, HMG…
REACTOME_CHYLOMICRON_MEDIATED_LIPID_TRANSPORT	11	0.481724	0.172645	0.797256	0.0037386	0.008612	P4HB, SDC1, HSPG2, LDLR, APOE, LPL, APOB, MTTP, LIPC, SAR1B, LDLRAP1
REACTOME_REGULATION_OF_WATER_BALANCE_BY_RENAL_AQUAPORINS	27	-0.268	0.44102	0.0913596	0.00374406	0.008612	PRKAR1A, GNB1, GNAS, GNB2, RAB11A, GNG10, PRKACB, PRKACA, PRKAR2B, ADCY7, AQP3, RAB11FIP2, GNB5, GNG11, ADCY9, PRKAR2A, ADCY8, GNG7, GNG5, PRKACG, AQP1, ADCY6, ADCY3, GNG12, PRKAR1B, ADCY2, ADCY1
REACTOME_REGULATION_OF_IFNG_SIGNALING	13	0.367535	0.124217	0.607622	0.00375091	0.00861246	STAT1, IFNGR2, JAK1, PTPN1, IFNGR1, PTPN2, JAK2, SOCS3, PTPN6, SUMO1, SOCS1, IFNG, PIAS1
KEGG_TYPE_II_DIABETES_MELLITUS	30	0.196013	0.0671564	0.319644	0.00381814	0.00873429	HK1, PIK3R2, PRKCZ, PRKCD, PIK3R3, HK2, MAPK9, SOCS2, PIK3CD, PIK3CA, IRS1, MAPK10, SOCS3, PIK3CG, CACNA1A, TNF, ADIPOQ, IRS4, INSR, MAPK1, IRS2, IKBKB, SOCS1, CACNA1G, PKLR, CACNA1C, MAPK3, PIK3R1, PIK3CB, PIK3R5
REACTOME_TRANSPORT_OF_MATURE_TRANSCRIPT_TO_CYTOPLASM	46	0.192904	0.0625118	0.317993	0.00382475	0.00873429	SRSF9, RNPS1, SRSF11, SRSF2, SRSF7, SRRM1, EIF4E, NCBP2, RAE1, SRSF4, RANBP2, TPR, SRSF1, NUP153, NUP62, NUP214, NUP133, NUP93, NFX1, U2AF1, SRSF3, NUP88, CDC40, SRSF5, NUPL2, POM121, SLBP, SRSF6, NUP155, NXF1, DHX38, NCBP1, MAGOH, NUP205, NUP210, NUP188, NUP50, RBM8A, NUP85, AAAS, NUP54, NUP37, UPF3B, NUP107, NUP43, SEH1L
BIOCARTA_INFLAM_PATHWAY	16	0.32492	0.109496	0.531608	0.00382749	0.00873429	CD4, IL6, PDGFA, IL15, IL7, LTA, CSF1, TNF, IL10, IL13, IL12B, IL1A, TGFB3, TGFB2, CSF2, IFNG
BIOCARTA_TGFB_PATHWAY	18	0.250873	0.0900785	0.405162	0.00383095	0.00873429	CDH1, CREBBP, EP300, SMAD4, MAP2K1, SMAD2, APC, TAB1, SMAD7, ZFYVE9, SMAD3, SKIL, MAP3K7, TGFBR1, TGFBR2, TGFB3, TGFB2, MAPK3
REACTOME_REGULATION_OF_SIGNALING_BY_CBL	16	0.261472	0.085598	0.434677	0.00392906	0.00894223	PIK3R2, CRK, LYN, PIK3R3, YES1, PIK3CD, PIK3CA, CRKL, VAV1, SYK, BLNK, HCK, FYN, PIK3R1, PIK3CB, GRB2
REACTOME_TRIGLYCERIDE_BIOSYNTHESIS	27	0.538753	0.177504	0.907576	0.00398978	0.00906449	ACLY, ACSL3, LPCAT1, ACSL1, ACSL4, LPIN2, DGAT1, ELOVL6, GPD1, GK, TECR, ELOVL5, SLC25A1, AGPAT2, ACACA, FASN, LPIN1, GPD1L, LPCAT4, AGPAT1, HSD17B12, ELOVL1, AGPAT5, ACSL5, ELOVL4, AGPAT4, AGPAT3
REACTOME_APOPTOTIC_CLEAVAGE_OF_CELLULAR_PROTEINS	35	-0.302723	0.502969	0.0982812	0.00412252	0.00934967	FNTA, DSP, GSN, BCAP31, CDH1, PLEC, VIM, CTNNB1, ACIN1, TJP1, BIRC2, TJP2, PRKCD, CASP3, LMNB1, SATB1, LMNA, APC, MAPT, DSG3, PKP1, GAS2, BMX, DSG1, CASP7, CASP8, PTK2, ADD1, SPTAN1, STK24, CASP6, OCLN, PRKCQ, ROCK1, DSG2
REACTOME_SIGNALING_BY_NOTCH4	10	-0.313922	0.520172	0.11601	0.00415461	0.00940598	ADAM10, PSEN1, PSEN2, NOTCH4, NCSTN, JAG1, JAG2, PSENEN, APH1A, APH1B
BIOCARTA_TID_PATHWAY	17	0.198273	0.0653118	0.334017	0.00425258	0.00961099	HSPA1A, NFKBIA, IFNGR2, TP53, RELA, IFNGR1, RB1, TNFRSF1B, JAK2, DNAJA3, WT1, TNF, TNFRSF1A, TAX1BP3, NFKB1, IKBKB, IFNG
REACTOME_METABOLISM_OF_PORPHYRINS	13	-0.264017	0.441094	0.0858152	0.00432656	0.00976114	BLVRB, UROS, HMBS, FECH, HMOX1, BLVRA, CPOX, PPOX, ALAS1, UGT1A1, UROD, HMOX2, ALAD
REACTOME_TRAF3_DEPENDENT_IRF_ACTIVATION_PATHWAY	12	0.266131	0.0852659	0.439654	0.00443828	0.00999578	CREBBP, EP300, IRF3, IKBKE, SIKE1, TRIM25, TRAF3, IRF7, IFIH1, TBK1, DDX58, MAVS
