# Supplementary material for: The interferon-rich skin environment regulates Langerhans cell ADAM17 to promote photosensitivity in lupus
Source: eLife. 2024 Jun 11;13:e85914. doi: 10.7554/eLife.85914 (PMC11213570; doi:10.7554/eLife.85914)
Supplement: Supplementary file 7. [file elife-85914-supp7.xlsx]

## Sheet: All_Counts
gene_id	gene_name	tag	seqnames	start	end	strand	CTRL_m17	CTRL_m18	CTRL_m19	CTRL_m20	CTRL_m3	CTRL_m6	IMQ_treat_m9	IMQ_treat_m11	IMQ_treat_m13	IMQ_treat_m15	IMQ_treat_m2	IMQ_treat_m4	IMQ_treat_m7	IMQ_un_m10	IMQ_un_m12	IMQ_un_m14	IMQ_un_m1	IMQ_un_m5	IMQ_un_m8
ENSMUSG00000051951	Xkr4		chr1	3205901	3671498	-	22	18	16	18	8	11	11	13	7	8	4	15	4	29	13	13	8	11	15
ENSMUSG00000103377	Gm37180		chr1	3365731	3368549	-	0	0	1	0	5	0	0	0	0	0	0	0	0	0	0	3	0	1	0
ENSMUSG00000103201	Gm37329		chr1	3512451	3514507	-	0	0	0	0	2	0	0	0	0	0	0	0	0	0	0	2	0	0	0
ENSMUSG00000103161	Gm38148		chr1	3592892	3595903	-	1	0	0	1	0	0	0	0	0	0	0	0	0	0	1	2	0	0	1
ENSMUSG00000102331	Gm19938		chr1	3647309	3658904	-	14	20	5	11	29	8	12	5	10	3	1	2	3	7	12	9	3	6	6
ENSMUSG00000025900	Rp1	overlapping_locus	chr1	3999557	4409241	-	93	97	101	68	77	54	39	25	35	24	26	41	44	79	39	47	61	42	36
ENSMUSG00000025902	Sox17		chr1	4490931	4497354	-	289	228	342	314	119	146	208	150	175	175	96	128	164	166	188	233	114	123	160
ENSMUSG00000104238	Gm37587		chr1	4496551	4499558	+	0	1	0	2	0	1	0	2	0	0	0	0	1	0	0	0	0	0	0
ENSMUSG00000102269	Gm7357	pseudo_consens	chr1	4522905	4526737	+	18	6	5	5	4	4	4	0	0	0	1	3	2	2	6	2	2	5	6
ENSMUSG00000096126	Gm22307		chr1	4529017	4529123	+	0	0	2	0	0	0	0	0	1	0	0	1	1	0	0	0	0	4	2
ENSMUSG00000104328	Gm37323		chr1	4583129	4586252	-	0	2	0	0	0	0	4	0	0	0	1	0	1	0	1	1	1	0	0
ENSMUSG00000098104	Gm6085	pseudo_consens	chr1	4687934	4689403	-	7	19	8	10	9	12	9	8	10	13	9	6	12	16	7	8	14	13	10
ENSMUSG00000102175	Gm6119	pseudo_consens	chr1	4692219	4693424	-	1	1	0	3	0	0	1	0	0	0	1	2	1	0	2	7	0	0	3
ENSMUSG00000103265	Gm2053	pseudo_consens	chr1	4735046	4735676	-	0	0	2	0	0	0	0	2	0	0	0	0	0	0	1	2	0	0	1
ENSMUSG00000103922	Gm6123	pseudo_consens	chr1	4771131	4772199	+	9	12	6	14	7	4	14	6	1	7	5	8	5	3	3	5	2	2	3
ENSMUSG00000033845	Mrpl15		chr1	4773206	4785739	-	1065	1123	965	1076	724	767	1261	1187	1042	1183	1052	926	845	812	1100	973	855	800	896
ENSMUSG00000102275	Gm37144		chr1	4778063	4779212	-	37	36	36	63	40	24	47	78	26	47	32	31	34	47	52	44	18	39	57
ENSMUSG00000025903	Lypla1	overlapping_locus	chr1	4807788	4848410	+	2121	2232	2162	2295	945	1554	2241	2075	2126	2044	1872	1823	1593	1740	2177	1796	789	1532	1813
ENSMUSG00000104217	Gm37988	overlapping_locus	chr1	4807892	4886770	+	0	0	0	0	0	0	0	0	0	0	0	0	0	0	0	12	0	0	1
ENSMUSG00000033813	Tcea1	overlapping_locus	chr1	4857814	4897909	+	1565	1429	1596	1535	601	947	1283	1234	1210	1221	1077	995	938	1023	1348	1150	485	1005	1108
ENSMUSG00000062588	Gm6104		chr1	4880049	4880651	-	3	3	4	0	1	2	1	3	1	1	3	4	3	1	0	3	2	1	2
ENSMUSG00000103280	Gm37277		chr1	4905751	4906861	-	63	58	46	42	13	22	89	103	89	62	72	99	66	50	50	49	7	26	40
ENSMUSG00000002459	Rgs20	overlapping_locus	chr1	4909576	5070285	-	306	343	395	321	109	236	527	477	443	339	389	401	367	302	373	391	134	243	261
ENSMUSG00000091305	Gm17100	overlapping_locus	chr1	4927028	4927299	-	0	0	0	0	0	2	2	0	0	3	1	3	3	4	0	1	0	2	0
ENSMUSG00000102653	Gm37079		chr1	4938576	4940710	-	5	0	1	4	0	0	6	8	1	5	1	1	1	1	6	3	0	1	4
ENSMUSG00000085623	Gm16041		chr1	4970857	4976820	+	2	9	1	8	4	6	6	6	6	16	6	5	6	24	6	7	3	3	12
ENSMUSG00000033793	Atp6v1h		chr1	5070018	5162529	+	2530	2577	2543	2516	1367	1814	2559	2697	2520	2280	2129	2141	2016	1935	2416	2422	1485	1945	1789
ENSMUSG00000025905	Oprk1		chr1	5588466	5606131	+	0	0	0	0	0	0	0	0	0	2	0	0	0	0	0	0	2	0	0
ENSMUSG00000033774	Npbwr1		chr1	5913707	5917398	-	425	550	503	500	234	505	616	588	485	594	373	603	463	541	603	460	247	538	336
ENSMUSG00000025907	Rb1cc1		chr1	6206197	6276648	+	4447	3962	4965	4653	1648	2992	4371	3766	4019	3933	2680	3396	3018	3532	4485	3916	847	2496	3463
ENSMUSG00000090031	4732440D04Rik		chr1	6209866	6215293	-	349	410	414	434	180	319	445	367	329	403	266	339	272	423	491	377	75	289	437
ENSMUSG00000103355	Gm2147	overlapping_locus	chr1	6380394	6381032	+	0	2	0	2	0	0	0	0	1	0	0	1	1	0	1	0	0	1	0
ENSMUSG00000103845	Gm19026	pseudo_consens	chr1	6429655	6441296	-	4	0	1	1	0	2	2	0	0	0	1	0	0	4	0	2	0	1	2
ENSMUSG00000033740	St18		chr1	6487231	6860940	+	14	18	42	9	9	9	31	16	36	25	27	30	16	19	40	28	9	34	27
ENSMUSG00000103329	Gm42492		chr1	6861237	6864151	-	0	0	0	0	1	0	6	3	0	1	1	0	1	0	3	0	1	2	0
ENSMUSG00000102135	Gm37108	pseudo_consens	chr1	6916559	6923588	+	6	2	1	5	4	6	3	20	9	4	5	4	3	2	8	4	4	1	10
ENSMUSG00000103629	Gm5694	pseudo_consens	chr1	7035915	7037217	+	1	3	4	8	1	1	0	0	0	0	1	2	0	2	4	3	1	0	1
ENSMUSG00000051285	Pcmtd1	overlapping_locus	chr1	7088920	7173628	+	4228	3783	4284	4413	1872	2549	3035	2535	2987	2694	1833	2244	2258	3112	3369	3329	848	2140	3082
ENSMUSG00000098201	Gm26983	pseudo_consens	chr1	7136199	7136586	-	1	0	0	8	0	1	0	0	0	0	0	2	2	0	0	0	0	1	3
ENSMUSG00000103509	Gm38372		chr1	7148110	7152137	+	79	56	166	259	24	50	113	64	109	148	91	79	40	134	185	114	14	74	198
ENSMUSG00000048538	Gm9826		chr1	7177739	7179037	+	0	0	0	2	0	1	0	0	0	9	2	1	0	0	1	1	0	0	0
ENSMUSG00000097797	Gm26901		chr1	7349406	7397869	-	28	44	53	57	26	48	42	40	41	26	33	22	29	11	36	33	12	27	40
ENSMUSG00000103067	Gm30414		chr1	7497968	7518149	+	3	7	0	0	1	3	1	3	0	0	1	2	0	10	0	0	0	0	3
ENSMUSG00000086235	Gm16284	overlapping_locus	chr1	8468426	8468825	-	0	0	1	0	0	0	0	0	0	1	0	0	0	0	0	0	0	0	1
ENSMUSG00000084353	Gm15452	overlapping_locus	chr1	8791923	8792162	-	0	0	0	2	3	1	6	0	0	0	4	4	2	0	0	0	4	1	1
ENSMUSG00000103933	Gm36964	pseudo_consens	chr1	8815842	8816039	+	0	1	0	1	1	3	3	1	1	0	7	3	4	0	0	0	4	2	1
ENSMUSG00000076135	Gm24276		chr1	8816138	8816247	+	1	3	1	0	1	0	2	0	1	1	1	1	2	0	0	0	0	0	2
ENSMUSG00000103411	Gm18300	pseudo_consens	chr1	9499338	9501522	-	0	0	6	2	0	2	3	5	3	0	2	0	1	4	0	1	0	0	1
ENSMUSG00000061024	Rrs1		chr1	9545408	9547455	+	1122	1252	1001	1283	707	782	1379	1804	1465	1372	1453	1235	1024	799	1267	1166	745	916	735
ENSMUSG00000025911	Adhfe1	overlapping_locus	chr1	9547948	9580673	+	432	308	338	357	194	165	157	116	182	171	87	122	142	236	205	280	126	182	240
ENSMUSG00000079671	2610203C22Rik		chr1	9560832	9631175	-	64	55	68	116	43	50	113	64	86	84	71	69	58	69	116	93	24	65	99
ENSMUSG00000081441	Gm6161	overlapping_locus	chr1	9574548	9575649	+	0	1	14	1	2	1	2	2	7	1	0	1	4	2	1	2	0	0	0
ENSMUSG00000067879	Vxn		chr1	9601199	9627143	+	2	1	13	4	0	4	6	6	8	4	2	1	5	3	15	7	0	3	5
ENSMUSG00000025912	Mybl1		chr1	9667415	9700209	-	201	212	202	276	101	157	151	165	164	171	155	158	94	128	162	146	48	160	139
ENSMUSG00000045210	Vcpip1		chr1	9718622	9748382	-	1307	1066	1306	1382	551	789	1170	1170	1179	980	850	852	806	962	1161	1143	395	805	1002
ENSMUSG00000097893	1700034P13Rik		chr1	9747648	9791924	+	10	21	5	16	9	8	18	3	21	6	8	5	11	5	13	12	4	10	8
ENSMUSG00000025915	Sgk3		chr1	9798107	9900845	+	1629	1522	1724	1904	728	1075	1897	1549	1719	1684	1298	1226	1089	1250	1672	1349	509	995	1349
ENSMUSG00000046334	Gm6195	pseudo_consens	chr1	9802197	9802553	-	0	0	5	1	0	1	0	0	0	0	0	0	0	0	0	0	0	0	0
ENSMUSG00000046101	Mcmdc2		chr1	9908638	9942085	+	5	19	8	27	5	9	16	8	16	21	10	12	11	12	9	3	7	4	8
ENSMUSG00000098234	Snhg6	overlapping_locus	chr1	9941959	9944118	-	369	495	450	526	282	304	503	451	463	516	418	406	353	301	491	469	208	311	406
ENSMUSG00000093178	Snord87		chr1	9942463	9942549	-	4	2	4	4	3	3	6	1	3	2	4	2	0	5	1	0	1	4	1
ENSMUSG00000099032	Tcf24		chr1	9960163	9967932	-	38	29	27	77	24	53	54	30	42	74	23	42	44	77	114	78	43	74	79
ENSMUSG00000104025	E330040D14Rik		chr1	9967314	9968687	+	4	3	9	2	4	1	1	3	4	6	0	3	4	5	14	14	5	7	4
ENSMUSG00000025916	Ppp1r42		chr1	9968624	10009136	-	14	7	6	4	6	5	6	4	6	12	2	4	4	13	3	13	4	3	9
ENSMUSG00000095780	Gm24674		chr1	10009814	10009917	-	0	0	0	0	0	0	0	0	0	0	0	0	1	0	4	0	0	0	0
ENSMUSG00000025917	Cops5		chr1	10024601	10038168	-	2602	3096	2738	2817	1959	2057	3028	3261	2961	2987	2714	2657	2246	2267	2797	2619	1695	2243	2303
ENSMUSG00000056763	Cspp1		chr1	10037987	10136768	+	950	903	1078	1244	618	709	1051	855	1033	989	622	786	600	861	1029	960	275	591	834
ENSMUSG00000067851	Arfgef1	overlapping_locus	chr1	10137571	10232670	-	3822	3440	4226	3899	1388	2760	4026	4290	4139	3910	3024	3432	2771	3294	3864	3581	1060	2629	2797
ENSMUSG00000088153	Gm26348		chr1	10166539	10166778	+	7	0	0	0	1	3	6	0	1	0	2	4	0	2	3	3	1	0	3
ENSMUSG00000102556	Gm37569	overlapping_locus	chr1	10197081	10198802	-	2	1	0	0	1	2	0	0	0	0	0	2	0	0	0	1	4	3	1
ENSMUSG00000042501	Cpa6	overlapping_locus	chr1	10324720	10719945	-	30	31	31	41	19	18	33	13	27	14	3	16	22	20	25	21	11	18	24
ENSMUSG00000103810	Gm38005	overlapping_locus	chr1	10449245	10451989	-	0	0	0	0	0	0	0	0	0	0	0	1	0	1	0	0	0	0	0
ENSMUSG00000083422	Gm15604	overlapping_locus	chr1	10554098	10555553	-	0	0	3	0	0	0	2	0	0	0	0	0	1	0	0	1	0	0	0
ENSMUSG00000100212	Gm5522	pseudo_consens	chr1	10805281	10806522	+	2	4	0	2	0	0	0	0	0	0	0	0	0	0	5	1	0	0	2
ENSMUSG00000100648	Gm28659	pseudo_consens	chr1	10868688	10869446	+	0	0	0	3	0	1	0	0	0	0	2	0	1	0	0	1	1	0	0
ENSMUSG00000048960	Prex2		chr1	10993465	11303681	+	904	516	842	871	254	374	428	327	459	445	272	285	271	478	549	534	163	404	468
ENSMUSG00000101827	Gm28686	pseudo_consens	chr1	11223566	11224174	-	0	0	0	0	1	0	0	4	0	0	0	0	0	0	0	5	0	0	0
ENSMUSG00000057715	A830018L16Rik	overlapping_locus	chr1	11414105	11975901	+	3	11	8	3	4	3	4	4	3	2	1	1	0	2	3	3	1	0	2
ENSMUSG00000097628	Gm2383	pseudo_consens	chr1	12565577	12566383	+	0	5	0	0	0	0	3	2	0	0	2	0	3	0	0	1	1	2	2
ENSMUSG00000098163	Gm6216	pseudo_consens	chr1	12655867	12656553	+	0	0	2	0	0	0	0	0	0	0	0	0	1	0	0	0	0	0	0
ENSMUSG00000016918	Sulf1		chr1	12692277	12861192	+	687	479	704	670	322	349	395	364	337	441	294	237	323	410	377	467	262	365	446
ENSMUSG00000025938	Slco5a1		chr1	12866549	12992650	-	429	310	380	280	324	200	308	344	329	355	218	257	237	227	229	358	138	165	163
ENSMUSG00000005886	Ncoa2	overlapping_locus	chr1	13139105	13374083	-	3863	3102	3754	4254	1212	2529	3181	3350	3553	3151	2228	2656	2244	2740	3209	3199	1003	2156	2464
ENSMUSG00000103506	Gm38376	overlapping_locus	chr1	13177462	13179714	-	20	6	20	7	11	7	16	18	15	18	13	6	2	11	8	17	6	12	5
ENSMUSG00000103495	Gm37409	overlapping_locus	chr1	13234809	13236434	-	0	0	2	0	1	0	5	0	0	6	4	0	3	1	2	0	3	2	2
ENSMUSG00000099183	Gm27881		chr1	13262198	13262279	+	0	1	0	0	0	0	0	0	0	0	1	0	0	0	0	0	0	0	0
ENSMUSG00000102639	Gm38223	overlapping_locus	chr1	13289812	13290506	-	0	0	0	0	0	0	5	4	0	0	0	2	0	0	0	0	0	0	0
ENSMUSG00000104170	Gm37702	overlapping_locus	chr1	13297036	13298907	-	3	0	1	0	0	3	0	3	3	1	2	5	2	0	3	1	0	1	2
ENSMUSG00000087782	Gm23169		chr1	13334498	13334609	-	0	4	2	5	0	0	0	0	0	0	1	0	0	0	0	0	0	0	0
ENSMUSG00000103085	Gm38120	overlapping_locus	chr1	13343563	13348204	-	7	5	15	29	86	7	14	7	2	7	8	9	6	16	7	4	46	12	9
ENSMUSG00000102664	Gm38380	overlapping_locus	chr1	13354483	13356730	-	6	4	5	6	41	4	4	5	1	4	7	5	6	1	8	7	10	0	6
ENSMUSG00000101476	Gm29570		chr1	13376070	13388413	+	2	7	2	1	1	1	0	8	0	3	0	1	1	1	1	0	0	0	2
ENSMUSG00000025935	Tram1		chr1	13564698	13589910	-	2868	2728	2898	2951	1316	1869	3086	2948	2748	2840	2410	2330	2162	2257	2680	2454	1520	2043	2322
ENSMUSG00000025937	Lactb2	overlapping_locus	chr1	13623330	13660546	-	754	820	783	811	379	473	731	824	734	749	521	531	554	678	780	693	280	461	664
ENSMUSG00000102982	Gm38319	overlapping_locus	chr1	13641483	13642748	-	16	15	16	27	4	8	9	24	13	23	12	18	10	13	7	13	2	6	21
ENSMUSG00000067813	Xkr9		chr1	13668771	13701723	+	4	20	27	12	17	30	16	2	14	7	3	14	7	13	26	6	18	23	14
ENSMUSG00000097711	Gm5523	pseudo_consens	chr1	13785883	13786879	-	3	2	4	1	3	3	3	1	0	3	2	3	2	0	1	0	2	6	3
ENSMUSG00000025932	Eya1	overlapping_locus	chr1	14168954	14310235	-	151	118	148	96	123	80	50	43	54	76	34	50	61	98	75	98	54	79	91
ENSMUSG00000054493	Gm9947		chr1	14752937	14776931	+	6	6	0	6	0	3	2	5	3	5	0	3	0	3	10	0	1	1	8
ENSMUSG00000025930	Msc		chr1	14753346	14755992	-	22	20	19	15	19	10	6	8	4	13	10	5	11	20	19	19	11	15	19
ENSMUSG00000103492	Gm37412		chr1	14788645	14792965	+	2	0	6	4	4	3	0	0	0	0	0	0	4	3	1	0	0	0	2
ENSMUSG00000082193	Rpl5-ps1		chr1	14865072	14865965	+	15	15	6	6	19	8	8	7	5	15	15	10	11	13	28	8	8	12	13
ENSMUSG00000073737	Gm10566	pseudo_consens	chr1	15268802	15269797	-	3	0	0	0	0	0	2	0	4	0	0	1	1	1	2	1	0	2	1
ENSMUSG00000092083	Kcnb2	overlapping_locus	chr1	15287254	15723750	+	1	0	1	0	1	2	7	1	15	13	0	2	1	0	7	0	0	0	0
ENSMUSG00000101652	Gm6060		chr1	15760122	15760668	-	0	0	0	0	0	0	0	0	0	0	0	0	0	0	1	0	0	0	3
ENSMUSG00000025925	Terf1		chr1	15805646	15844052	+	420	382	386	457	310	265	516	401	427	477	399	339	358	299	473	340	139	266	368
ENSMUSG00000104379	Gm37509		chr1	15853331	15856499	+	11	7	8	5	5	5	4	5	4	11	2	8	5	15	2	6	5	4	7
ENSMUSG00000032719	Sbspon		chr1	15853862	15892722	-	67	63	41	63	24	28	29	7	25	45	15	5	17	46	20	31	30	18	24
ENSMUSG00000100652	Gm7634	pseudo_consens	chr1	16053335	16053887	+	3	2	2	9	1	2	0	0	0	0	2	0	0	1	0	0	2	0	1
ENSMUSG00000067795	4930444P10Rik		chr1	16065979	16093325	-	9	10	2	14	2	2	0	2	4	7	1	4	1	0	1	5	0	3	0
ENSMUSG00000043716	Rpl7		chr1	16101295	16104662	-	21945	25940	22140	25629	12890	14615	24659	22328	22367	22711	21036	18453	18472	17170	21995	20938	15846	16108	21267
ENSMUSG00000025921	Rdh10		chr1	16105774	16133734	+	851	948	898	1049	387	647	930	982	1070	900	705	866	663	745	1058	915	479	665	737
ENSMUSG00000104165	Gm38249		chr1	16208197	16210517	-	0	0	0	2	1	0	0	0	0	0	0	2	0	0	0	3	0	0	1
ENSMUSG00000100868	Gm28095		chr1	16228506	16244062	+	1	5	0	1	5	2	0	1	3	0	0	1	0	3	0	0	0	0	1
ENSMUSG00000025920	Stau2		chr1	16228674	16520112	-	888	920	881	867	560	632	587	705	649	561	496	493	518	586	819	789	473	601	547
ENSMUSG00000089982	Gm7568		chr1	16253592	16267921	+	0	0	1	0	0	0	0	0	0	0	0	0	0	3	0	0	0	2	2
ENSMUSG00000025939	Ube2w		chr1	16540790	16619489	-	844	855	877	948	476	569	734	758	590	619	562	573	547	746	871	703	305	524	685
ENSMUSG00000102457	Gm38342		chr1	16618560	16621539	+	16	6	12	24	2	11	5	3	4	10	3	11	6	3	19	9	2	6	8
ENSMUSG00000079658	Eloc		chr1	16641725	16657042	-	1739	1756	1672	1735	1222	1142	1566	1554	1599	1436	1400	1341	1233	1038	1564	1423	687	994	1213
ENSMUSG00000097744	D030040B21Rik		chr1	16657552	16662278	+	0	0	0	1	2	0	0	0	0	0	0	1	0	1	0	0	0	0	0
ENSMUSG00000100959	Gm7654	pseudo_consens	chr1	16662980	16663662	-	0	0	0	0	0	1	0	0	0	3	0	1	0	2	0	0	1	0	0
ENSMUSG00000025940	Tmem70		chr1	16665207	16678275	+	851	757	731	800	564	532	803	732	784	660	668	576	618	608	718	646	413	541	653
ENSMUSG00000025779	Ly96		chr1	16688051	16709611	+	87	80	99	82	43	48	112	153	89	97	98	105	91	81	107	92	37	75	95
ENSMUSG00000091020	Gm5828	pseudo_consens	chr1	16768279	16770138	-	0	0	0	2	0	0	0	0	1	0	0	0	1	0	6	1	0	1	0
ENSMUSG00000042686	Jph1		chr1	16964560	17097889	-	923	589	728	499	899	460	281	288	298	330	188	215	353	428	448	608	348	411	316
ENSMUSG00000025777	Gdap1		chr1	17145362	17164271	+	9	25	42	5	50	22	4	4	8	12	3	10	9	8	34	17	4	23	8
ENSMUSG00000100398	Gm5251	pseudo_consens	chr1	17394958	17395429	+	0	0	0	0	0	0	0	1	0	0	2	3	1	0	0	0	0	0	0
ENSMUSG00000101589	Rbm6-ps1		chr1	17397412	17400281	-	7	7	4	18	4	2	3	3	1	8	7	4	3	0	3	7	2	5	8
ENSMUSG00000102048	Gm6075	pseudo_consens	chr1	17429043	17429528	-	0	1	3	1	0	1	0	0	1	2	0	1	1	0	0	0	0	0	0
ENSMUSG00000067780	Pi15		chr1	17601901	17630939	+	201	85	202	287	95	134	450	323	320	495	654	360	212	108	127	92	42	105	98
ENSMUSG00000100053	Gm28154		chr1	17615084	17641081	-	59	28	54	31	63	30	23	20	26	21	24	8	26	34	32	35	12	22	41
ENSMUSG00000085125	Gm16070		chr1	17676027	17727646	-	53	44	42	36	29	16	15	22	16	27	9	10	19	33	30	27	15	13	32
ENSMUSG00000025776	Crispld1		chr1	17727045	17766344	+	1711	1339	1581	1814	736	820	598	605	1072	820	437	342	484	898	870	1022	445	623	764
ENSMUSG00000099895	Gm28153		chr1	17741915	17805417	-	11	1	4	7	8	3	0	3	2	2	0	0	1	1	1	4	4	2	3
ENSMUSG00000100554	Gm7690	pseudo_consens	chr1	17947041	17948439	+	1	0	1	0	0	0	1	1	0	0	0	0	1	0	0	0	0	1	0
ENSMUSG00000099591	Gm17969	pseudo_consens	chr1	17993813	17997483	+	0	0	0	0	0	0	1	3	1	0	0	1	1	0	0	0	0	0	0
ENSMUSG00000109887	Gm28756	overlapping_locus	chr1	17994462	18059056	-	0	0	0	0	0	0	6	3	0	0	0	3	3	0	0	0	0	0	1
ENSMUSG00000101685	Gm17837	overlapping_locus	chr1	18262395	18263379	-	0	0	1	0	0	0	0	0	0	0	1	0	0	0	0	0	0	0	0
ENSMUSG00000100720	Gm10075	pseudo_consens	chr1	19153422	19153966	-	2	2	0	0	0	0	0	0	1	0	1	0	1	0	0	0	0	0	1
ENSMUSG00000025927	Tfap2b		chr1	19208914	19238576	+	3556	3778	3881	4507	1680	2364	2365	1896	2298	2302	1296	1563	1593	2635	3181	3074	1705	1600	2436
ENSMUSG00000100538	Gm28340		chr1	19242725	19243769	+	0	0	0	0	1	0	0	0	0	0	0	0	0	0	2	0	0	0	0
ENSMUSG00000100204	Gm4849	pseudo_consens	chr1	19330939	19333184	+	0	2	2	0	3	4	3	3	1	1	2	2	0	0	2	0	0	1	2
ENSMUSG00000043760	Pkhd1	overlapping_locus	chr1	20057779	20618064	-	0	0	1	3	0	0	0	0	1	1	1	1	2	0	0	0	0	1	0
ENSMUSG00000099906	Gm28653	ncRNA_host	chr1	20669882	20684298	+	81	52	57	70	101	50	47	36	43	33	24	41	34	39	58	50	14	51	39
ENSMUSG00000025929	Il17a		chr1	20730905	20734496	+	0	0	0	0	1	0	56	56	13	54	46	39	33	11	42	0	5	12	2
ENSMUSG00000041872	Il17f		chr1	20777146	20790617	-	2	7	7	5	2	5	87	59	40	87	85	49	46	25	40	9	8	23	10
ENSMUSG00000041859	Mcm3		chr1	20802968	20820312	-	970	1023	907	1280	598	695	1907	1833	1527	1838	1576	943	1095	842	1035	977	725	689	543
ENSMUSG00000102121	Gm28065		chr1	20836661	20839689	+	2	6	14	2	0	1	2	0	0	0	0	1	0	0	0	1	0	1	2
ENSMUSG00000097934	6720483E21Rik		chr1	20888650	20890473	-	4	8	6	2	9	3	1	6	2	2	8	2	1	0	9	8	1	2	5
ENSMUSG00000025931	Paqr8		chr1	20890606	20939650	+	666	544	524	598	182	295	496	463	435	454	277	367	371	387	369	369	113	237	327
ENSMUSG00000100929	Gm28064		chr1	20945711	20946914	+	0	2	0	0	0	0	0	0	5	0	0	0	1	0	5	3	0	1	0
ENSMUSG00000041809	Efhc1		chr1	20951626	20990841	+	47	43	87	88	22	37	54	41	23	38	25	19	32	32	64	52	28	30	65
ENSMUSG00000041779	Tram2		chr1	20996299	21079229	-	812	645	948	928	372	528	558	553	643	538	446	405	428	598	768	696	438	504	581
ENSMUSG00000099971	Gm28287		chr1	21080114	21081748	+	4	1	0	1	6	3	0	0	5	0	1	0	0	1	1	0	0	1	1
ENSMUSG00000100819	Gm2693		chr1	21178988	21187427	+	0	5	6	3	4	1	10	0	0	1	0	1	0	7	6	3	0	2	1
ENSMUSG00000025933	Tmem14a		chr1	21218575	21230167	+	81	108	116	123	50	55	61	39	85	49	41	38	47	84	66	97	38	47	68
ENSMUSG00000102633	Gm38224		chr1	21234722	21236821	+	3	4	3	0	0	0	0	2	1	3	1	0	1	0	2	0	0	1	3
ENSMUSG00000025934	Gsta3		chr1	21240589	21265661	+	2119	922	774	2135	270	510	398	361	1250	452	118	215	315	632	879	1598	325	452	817
ENSMUSG00000099343	Gm28836		chr1	21250359	21271593	-	4	0	0	3	3	0	1	0	3	0	0	0	0	1	0	0	0	1	0
ENSMUSG00000025936	Gm4956		chr1	21285246	21298312	-	5	1	4	2	1	1	2	0	2	3	0	3	0	1	3	0	0	1	0
ENSMUSG00000067750	Khdc1a		chr1	21349641	21352200	+	0	3	0	0	0	0	0	0	5	0	0	0	1	0	0	3	0	0	0
ENSMUSG00000028033	Kcnq5	overlapping_locus	chr1	21398403	21961942	-	173	90	145	80	155	99	53	38	60	46	34	27	57	93	77	75	62	101	53
ENSMUSG00000082935	Gm7658	overlapping_locus	chr1	21511933	21513056	-	6	13	4	6	6	4	8	9	3	3	6	8	11	3	10	24	5	8	9
ENSMUSG00000103748	Gm38243	overlapping_locus	chr1	21838948	21840514	-	0	0	0	0	0	1	0	1	0	0	0	0	0	0	0	0	2	0	0
ENSMUSG00000041670	Rims1	fragmented_locus	chr1	22286251	22805994	-	13	11	13	23	8	15	16	17	37	24	19	31	13	11	11	14	1	2	6
ENSMUSG00000101227	Gm29506	overlapping_locus	chr1	23048295	23235673	-	2	0	0	0	0	0	0	0	0	0	1	0	0	3	2	0	0	0	0
ENSMUSG00000102766	Gm6420		chr1	23255685	23256407	-	2	7	0	2	0	2	2	0	0	0	0	1	0	0	0	0	0	0	2
ENSMUSG00000097970	Gm27028	ncRNA_host	chr1	23291537	23291935	+	40	62	41	31	35	30	25	23	43	32	12	21	25	29	41	29	5	20	32
ENSMUSG00000100775	Gm29107		chr1	23293729	23294075	+	13	18	20	5	14	6	4	3	0	3	3	6	11	8	11	1	2	5	9
ENSMUSG00000026158	Ogfrl1		chr1	23366424	23397772	-	1376	1418	1327	1504	960	923	970	964	901	844	749	679	718	974	1165	1250	673	746	1083
ENSMUSG00000097920	Gm7784	pseudo_consens	chr1	23479539	23480527	+	0	2	1	0	0	0	1	3	2	1	2	2	0	0	4	2	1	0	0
ENSMUSG00000026156	B3gat2		chr1	23761753	23849158	+	126	139	145	177	60	80	91	80	119	129	86	111	72	82	104	115	36	88	108
ENSMUSG00000026155	Smap1		chr1	23844846	23922317	-	1309	1317	1213	1425	907	938	1565	1546	1589	1404	1397	1217	1182	1014	1329	1180	809	974	881
ENSMUSG00000026154	Sdhaf4		chr1	23995939	24005656	-	331	309	235	356	267	207	251	204	222	235	209	198	174	224	292	304	217	200	251
ENSMUSG00000102495	Gm26524		chr1	24005505	24005894	+	0	0	1	0	1	1	9	4	4	0	1	3	0	6	5	5	0	1	1
ENSMUSG00000026153	Fam135a		chr1	24011093	24100341	-	3652	3336	4160	4130	1566	2752	4529	4944	4465	4118	3323	4119	3088	3201	4481	3474	862	2763	3174
ENSMUSG00000102398	Gm37580		chr1	24100625	24103424	+	1	12	0	11	0	5	7	1	3	0	2	4	2	3	2	1	3	7	4
ENSMUSG00000026147	Col9a1		chr1	24177610	24252684	+	1505	1281	1367	2042	893	764	419	334	485	372	312	167	246	888	833	1068	609	495	588
ENSMUSG00000026141	Col19a1	ncRNA_host	chr1	24261890	24587472	-	23	5	8	29	6	7	0	3	1	4	0	2	5	5	1	2	1	2	2
ENSMUSG00000099997	Tubb4b-ps2	pseudo_consens	chr1	24594087	24595423	-	2	2	1	0	4	4	2	1	1	1	3	3	5	2	1	1	0	1	0
ENSMUSG00000100131	Gm28439	overlapping_locus	chr1	24611535	24612410	-	1	1	1	2	0	1	0	0	0	2	1	0	1	0	1	0	1	1	0
ENSMUSG00000101939	Gm28438		chr1	24612775	24613119	-	1	1	3	4	4	3	2	7	4	2	1	2	2	7	3	6	0	1	0
ENSMUSG00000101111	Gm28437		chr1	24613189	24613971	-	16	11	12	10	18	16	24	12	9	13	25	6	17	12	5	15	32	19	17
ENSMUSG00000100862	Gm10925		chr1	24613974	24614651	-	11	18	24	11	20	10	13	20	9	14	14	15	15	17	7	21	12	4	4
ENSMUSG00000102070	Gm28661		chr1	24614885	24615565	-	26	29	23	10	18	11	25	9	14	17	15	18	17	9	12	7	23	10	11
ENSMUSG00000101249	Gm29216		chr1	24615706	24616197	-	15	16	33	25	9	5	13	9	15	8	8	7	6	12	18	21	13	4	9
ENSMUSG00000073725	Lmbrd1		chr1	24678630	24766301	+	2879	2520	2850	2743	1423	1777	1963	2087	2204	1742	1574	1632	1548	1942	2332	2246	1326	1757	1997
ENSMUSG00000033569	Adgrb3	overlapping_locus	chr1	25067476	25829707	-	1	2	2	1	1	0	0	4	1	0	6	1	0	4	1	2	0	3	2
ENSMUSG00000102386	2900022M07Rik	overlapping_locus	chr1	25808956	25809972	-	0	4	0	0	3	0	0	0	0	0	0	0	0	0	0	0	0	1	0
ENSMUSG00000101372	Gm19028	overlapping_locus	chr1	27989910	27991782	+	0	0	0	0	1	0	0	0	1	0	0	0	0	0	0	0	0	0	1
ENSMUSG00000086240	Gm7846	pseudo_consens	chr1	28580499	28580772	-	9	13	8	4	26	14	12	12	39	26	21	20	9	19	22	6	15	15	12
ENSMUSG00000081557	Gm5697	pseudo_consens	chr1	28800240	28802721	-	0	0	0	0	0	0	0	1	0	1	0	0	0	0	0	0	0	1	0
ENSMUSG00000099492	Gm5525	pseudo_consens	chr1	29484604	29485915	-	4	0	3	4	7	8	3	10	12	5	5	5	13	2	9	3	3	3	9
ENSMUSG00000053185	Gm9898		chr1	30718560	30719962	-	0	1	0	0	1	0	0	0	0	0	1	2	0	0	1	0	0	0	0
ENSMUSG00000100261	Gm6473		chr1	30769687	30771815	+	1	0	3	2	1	0	1	1	0	1	0	2	0	0	0	0	0	2	0
ENSMUSG00000048874	Phf3	overlapping_locus	chr1	30802339	30873921	-	3099	2562	3003	3434	1537	2026	2584	2670	2636	2594	1963	2027	1889	2358	2881	2677	1217	1983	2303
ENSMUSG00000103783	Gm37522	overlapping_locus	chr1	30833548	30836431	-	5	0	1	0	0	6	1	0	1	0	1	0	0	9	4	3	1	0	0
ENSMUSG00000104315	Gm37906	overlapping_locus	chr1	30865504	30868538	-	9	0	2	4	0	1	0	2	0	0	0	2	3	3	5	4	0	1	2
ENSMUSG00000026064	Ptp4a1		chr1	30940302	30949309	-	34	22	60	36	9	21	34	32	61	24	9	22	19	36	23	27	10	20	31
ENSMUSG00000086726	Gm9458	pseudo_consens	chr1	30986225	30986953	-	0	2	0	0	0	0	0	0	2	1	0	1	0	0	0	0	0	0	0
ENSMUSG00000086727	4931428L18Rik	retrogene	chr1	30997842	31222684	-	14	0	5	8	5	7	4	2	0	0	4	5	1	1	4	7	0	9	6
ENSMUSG00000100237	Gm28644		chr1	31041919	31043675	+	1	0	0	1	0	0	3	1	0	0	0	0	2	0	0	1	0	0	2
ENSMUSG00000100910	Gm29128		chr1	31136026	31150105	+	3	0	0	2	0	2	0	0	0	1	0	0	0	2	3	0	0	0	0
ENSMUSG00000099796	Gm7893	pseudo_consens	chr1	31164549	31164773	+	0	0	0	0	0	0	0	0	0	0	0	0	0	0	2	0	0	0	1
ENSMUSG00000070960	Gm19680	pseudo_consens	chr1	31615149	31616661	+	6	6	3	6	13	7	16	17	17	10	13	10	7	1	8	5	12	8	9
ENSMUSG00000104498	Gm37110	overlapping_locus	chr1	32485315	32486942	+	1	0	1	2	0	1	0	0	1	1	0	0	0	0	0	0	0	0	0
ENSMUSG00000100481	Gm7114	pseudo_consens	chr1	33100907	33102695	+	1	0	1	3	1	4	0	2	0	0	2	1	0	1	6	9	1	6	0
ENSMUSG00000026134	Prim2	overlapping_locus	chr1	33453810	33669795	-	323	422	302	417	179	269	375	410	406	472	446	291	276	192	302	293	193	264	202
ENSMUSG00000102714	Gm37618	overlapping_locus	chr1	33613758	33616832	-	0	1	0	0	5	1	0	0	0	2	0	0	2	0	0	0	0	1	0
ENSMUSG00000103746	1700001G17Rik		chr1	33669824	33670712	+	29	15	7	35	31	13	27	13	9	19	8	18	6	21	20	32	21	15	19
ENSMUSG00000102198	Gm38173	overlapping_locus	chr1	33671915	33674228	-	0	2	0	1	0	0	4	0	2	1	0	2	0	0	0	3	1	1	0
ENSMUSG00000004768	Rab23		chr1	33719887	33742564	+	673	643	735	862	382	540	536	557	462	542	478	413	355	497	680	635	359	480	499
ENSMUSG00000042215	Bag2		chr1	33745484	33757795	-	322	276	272	311	130	199	332	333	398	319	282	291	200	192	269	230	219	179	176
ENSMUSG00000103072	Gm37905		chr1	33748007	33748347	+	4	1	2	2	2	1	0	2	6	4	1	1	6	0	0	0	0	1	1
ENSMUSG00000042197	Zfp451		chr1	33761545	33814595	-	1385	1165	1401	1526	663	924	1205	1266	1080	1079	838	884	820	1205	1200	992	464	872	1088
ENSMUSG00000081402	Gm15455		chr1	33836124	33838680	-	3	3	5	2	4	3	0	4	7	2	4	2	1	3	0	1	0	1	1
ENSMUSG00000042182	Bend6	overlapping_locus	chr1	33852052	33907816	-	52	36	33	58	19	12	33	13	47	21	19	17	15	18	32	44	4	20	37
ENSMUSG00000104416	Gm37067	overlapping_locus	chr1	33889490	33891117	-	4	0	0	0	0	1	0	0	0	0	2	0	0	0	0	1	0	0	0
ENSMUSG00000026131	Dst	overlapping_locus	chr1	33908225	34308661	+	46374	38856	46012	50111	16999	26608	28260	21876	27741	24720	13893	15807	22325	38582	37738	39945	17189	22483	33460
ENSMUSG00000103596	Gm37354	overlapping_locus	chr1	33922455	33924838	+	0	0	0	0	1	0	0	1	1	0	0	0	1	0	0	0	1	0	2
ENSMUSG00000103364	Gm38157	overlapping_locus	chr1	34032100	34033797	+	19	20	10	16	74	15	16	11	4	12	14	7	12	17	21	8	48	7	4
ENSMUSG00000096992	Gm26788		chr1	34165856	34178446	-	903	769	1132	1374	230	445	421	313	405	348	153	236	317	837	932	724	136	326	1022
ENSMUSG00000101462	Gm3052		chr1	34415050	34417986	-	4	2	18	15	4	8	17	11	9	3	13	8	6	16	24	8	4	11	13
ENSMUSG00000102336	Gm37233	ncRNA_host	chr1	34427002	34433264	-	36	26	36	57	6	22	42	47	33	52	20	21	22	53	58	57	10	30	52
ENSMUSG00000042111	Ccdc115		chr1	34436670	34439672	-	1121	1101	967	1137	673	733	915	960	954	949	893	803	687	765	1080	973	513	728	883
ENSMUSG00000101711	Gm28306		chr1	34439511	34444730	-	4	3	13	6	0	2	4	4	7	0	7	0	2	2	3	1	6	1	1
ENSMUSG00000026127	Imp4		chr1	34439851	34449356	+	1407	1377	1414	1534	823	968	1647	1460	1351	1345	1312	1145	1062	1106	1414	1186	989	1053	1028
ENSMUSG00000026126	Ptpn18		chr1	34459762	34475733	+	195	189	207	313	127	151	277	237	218	280	181	156	198	238	253	323	213	231	386
ENSMUSG00000100280	Gm28417		chr1	34468834	34473148	-	16	28	28	38	27	36	46	21	34	34	19	25	28	35	60	47	19	22	67
ENSMUSG00000101223	4930568A12Rik		chr1	34477167	34485933	-	1	1	9	3	2	2	0	5	3	2	2	2	2	0	13	4	1	3	7
ENSMUSG00000026125	Prss39		chr1	34498410	34503063	+	0	0	0	0	0	0	2	0	1	1	1	0	0	0	3	0	0	0	0
ENSMUSG00000026124	Cfc1		chr1	34535648	34544313	+	0	4	0	0	0	0	1	0	0	0	0	0	0	0	0	0	0	0	1
ENSMUSG00000037509	Arhgef4	overlapping_locus	chr1	34678188	34813309	+	1963	2220	2271	2463	678	1493	2485	2123	2299	2091	1682	1604	1405	1701	1930	2010	699	1117	1300
ENSMUSG00000102537	Gm37224		chr1	34752775	34752922	+	1	0	0	1	0	0	0	0	0	0	1	0	2	4	0	0	0	0	2
ENSMUSG00000102612	Gm37845		chr1	34753123	34753477	+	0	0	0	0	0	1	0	5	0	0	0	2	0	0	0	0	0	1	3
ENSMUSG00000104002	Gm38336		chr1	34809360	34811908	-	26	67	39	103	28	45	66	83	78	74	40	34	52	60	53	57	25	30	44
ENSMUSG00000037503	Fam168b		chr1	34813219	34843065	-	6858	6944	6946	7633	3179	4908	6161	5569	6182	5808	5011	4437	4149	5273	6501	6403	3518	4429	4982
ENSMUSG00000104358	Gm37127		chr1	34823525	34826560	+	57	23	30	57	8	35	42	33	29	43	18	29	19	39	35	47	6	15	41
ENSMUSG00000026123	Plekhb2		chr1	34849976	34879580	+	1519	1380	1383	1558	816	1124	2507	2729	2221	2363	2211	1942	1627	1400	1991	1797	953	1439	1392
ENSMUSG00000103548	Gm37670	pseudo_consens	chr1	34969627	34969855	-	0	0	0	0	0	0	0	0	1	0	0	0	1	0	0	0	0	0	0
ENSMUSG00000104417	Gm37068		chr1	35625606	35651297	-	5	1	3	3	2	2	7	2	0	7	0	0	0	7	2	0	0	2	0
ENSMUSG00000101714	Gm28415		chr1	35806974	35810462	+	0	1	0	0	3	1	0	2	0	0	0	0	0	0	0	0	0	0	0
ENSMUSG00000102531	1110002O04Rik		chr1	35879845	35881119	+	0	0	0	3	3	0	1	0	0	0	0	1	0	0	5	0	0	1	0
ENSMUSG00000102279	Gm37146		chr1	35981960	35986373	-	8	1	0	0	1	0	0	0	2	2	2	0	1	0	0	4	0	0	0
ENSMUSG00000102434	Gm38049		chr1	36029647	36031018	-	0	0	6	3	0	0	0	0	0	3	0	0	0	0	1	1	0	1	1
ENSMUSG00000045216	Hs6st1		chr1	36068400	36106446	+	1991	2156	2348	2543	879	1391	2114	1911	2004	1791	1534	1477	1249	1755	1807	1856	1058	1345	1704
ENSMUSG00000102202	Gm33280		chr1	36132042	36138746	+	34	19	35	40	6	8	19	53	25	29	22	21	12	28	35	25	10	10	18
ENSMUSG00000037470	Uggt1	ncRNA_host	chr1	36140027	36244720	-	2898	2874	3001	2977	1544	1965	2674	2666	2760	2516	2142	1898	1963	2119	2612	2635	1571	1877	1846
ENSMUSG00000047180	Neurl3		chr1	36264597	36274679	-	353	399	394	370	187	193	265	216	172	242	285	187	225	163	274	310	183	257	355
ENSMUSG00000037447	Arid5a		chr1	36307733	36324029	+	670	554	623	736	417	416	539	598	478	505	414	330	392	554	626	596	449	432	541
ENSMUSG00000102762	4930403P22Rik		chr1	36332708	36333420	+	2	7	8	2	2	2	0	2	0	1	1	2	2	13	4	6	0	4	6
ENSMUSG00000010453	Kansl3	ncRNA_host	chr1	36335730	36369181	-	3204	2907	3174	3719	1686	2181	2261	2335	2250	1946	1696	1769	1765	2402	2802	2723	1515	2038	2440
ENSMUSG00000098680	Mir6898		chr1	36348682	36348758	-	0	2	0	0	0	0	0	0	0	0	0	0	1	0	0	0	0	0	0
ENSMUSG00000037432	Fer1l5		chr1	36372291	36422110	+	144	179	198	213	97	118	124	169	116	128	94	87	107	222	201	186	71	121	212
ENSMUSG00000001143	Lman2l		chr1	36419871	36445271	-	1111	902	1080	1145	595	641	836	698	810	709	577	541	593	811	942	882	496	608	873
ENSMUSG00000037408	Cnnm4	ncRNA_host	chr1	36471620	36508764	+	1061	1094	1060	1132	523	847	831	1008	860	789	529	784	631	886	1080	1033	509	748	629
ENSMUSG00000104316	Gm37909		chr1	36473952	36476110	+	31	43	47	18	29	25	20	35	32	12	17	20	16	24	44	35	20	26	12
ENSMUSG00000001138	Cnnm3		chr1	36511867	36528237	+	1464	1360	1509	1683	705	988	1237	1170	1075	991	787	750	868	1144	1265	1402	838	777	1179
ENSMUSG00000067653	Ankrd23		chr1	36530188	36536883	-	535	407	465	334	563	232	172	139	164	161	104	109	182	216	228	337	217	258	238
ENSMUSG00000109510	Gm42417	overlapping_locus	chr1	36530193	36539429	-	0	3	1	0	0	0	0	2	0	0	3	0	0	0	1	0	4	0	1
ENSMUSG00000079610	Ankrd39	overlapping_locus	chr1	36537507	36547445	-	303	321	331	363	201	234	355	249	296	276	213	209	196	247	305	262	197	166	278
ENSMUSG00000026121	Sema4c		chr1	36548639	36558349	-	1712	1620	1844	2172	1044	1349	2401	2020	2100	1935	1684	1682	1363	1453	1842	1546	861	1138	1289
ENSMUSG00000087589	D430040D24Rik		chr1	36557701	36565613	+	172	198	192	181	127	138	156	145	115	159	126	122	109	130	195	160	103	116	149
ENSMUSG00000046337	Fam178b		chr1	36562692	36683183	-	152	184	124	166	123	105	155	45	145	90	103	80	70	132	117	139	146	91	86
ENSMUSG00000089906	Gm6428	pseudo_consens	chr1	36601802	36602146	+	1	0	4	1	3	0	0	3	2	1	1	2	8	0	1	1	0	1	5
ENSMUSG00000061518	Cox5b		chr1	36691449	36693681	+	2819	2734	2230	2905	2367	1710	3475	2737	2965	3179	2880	2131	2237	1795	2535	2448	2685	1824	2033
ENSMUSG00000037351	Actr1b		chr1	36698114	36714422	-	4031	3949	3549	4185	2162	2655	3724	3825	3723	3620	3116	2925	2746	2888	3329	3465	2302	2519	2878
ENSMUSG00000102416	4933424G06Rik		chr1	36710149	36757953	+	3	7	2	5	2	3	1	6	7	0	1	2	1	0	3	1	0	2	1
ENSMUSG00000104237	Gm33533		chr1	36739048	36744792	-	0	1	0	6	0	0	0	2	0	0	0	0	0	0	0	0	2	1	0
ENSMUSG00000026117	Zap70		chr1	36761798	36782818	+	195	178	140	181	101	99	130	99	75	151	125	96	74	121	186	149	67	104	153
ENSMUSG00000097291	Gm18828	pseudo_consens	chr1	36764863	36765874	-	0	0	0	0	0	0	0	0	0	0	0	0	2	0	3	0	0	0	0
ENSMUSG00000026116	Tmem131	overlapping_locus	chr1	36792191	36943666	-	5393	5321	6040	6439	1890	4156	4950	4809	5087	4156	3364	3970	3598	4594	4539	5337	2297	3435	3484
ENSMUSG00000103016	Gm37506		chr1	36871903	36872045	-	0	0	3	0	2	1	5	3	0	5	0	1	3	1	0	0	0	2	0
ENSMUSG00000102930	Gm38115	overlapping_locus	chr1	36913601	36916539	-	3	14	13	5	47	2	12	4	6	1	6	4	9	0	6	8	14	2	4
ENSMUSG00000103159	F830112A20Rik		chr1	36922797	36926348	-	0	1	3	4	1	3	2	0	7	3	5	1	3	11	3	7	3	2	1
ENSMUSG00000080054	Rpl12-ps1	pseudo_consens	chr1	36957930	36958427	-	0	1	0	3	0	1	0	1	0	0	2	5	1	1	1	1	1	0	1
ENSMUSG00000050122	Vwa3b		chr1	37026596	37187613	+	25	23	19	25	16	21	19	8	17	13	14	7	6	14	31	21	11	25	12
ENSMUSG00000026114	Cnga3		chr1	37214434	37263384	+	3	8	15	7	4	5	6	14	4	6	11	16	2	6	23	12	8	4	9
ENSMUSG00000026113	Inpp4a		chr1	37299865	37410736	+	1298	1043	1296	1401	663	843	879	736	931	776	573	656	669	986	1157	1090	416	695	1044
ENSMUSG00000086064	4930439A04Rik		chr1	37329667	37334172	-	0	0	0	0	0	0	0	0	0	0	0	0	0	0	0	1	0	0	1
ENSMUSG00000026112	Coa5		chr1	37417084	37430103	-	2778	2739	2964	2973	1524	2105	2711	2722	2669	2543	2232	2101	1909	2185	2786	2639	1714	2041	2258
ENSMUSG00000026111	Unc50		chr1	37430139	37439124	+	1709	2017	1647	2132	1017	1276	1366	1456	1469	1310	1205	1128	1111	1332	1700	1572	914	1149	1430
ENSMUSG00000026110	Mgat4a	overlapping_locus	chr1	37439340	37541016	-	746	649	811	878	328	478	633	671	820	702	466	529	517	543	566	634	310	468	596
ENSMUSG00000103948	4930594C11Rik		chr1	37485851	37488605	-	1	2	2	0	5	1	0	0	0	3	2	1	1	0	4	0	0	0	2
ENSMUSG00000087233	Gm43213	overlapping_locus	chr1	37487193	37488982	-	0	0	0	1	0	0	0	1	0	0	0	0	1	0	2	0	3	0	1
ENSMUSG00000026090	2010300C02Rik	overlapping_locus	chr1	37611677	37720085	-	974	1035	892	1056	391	651	1436	1304	1713	1322	1093	891	846	666	1009	878	697	669	593
ENSMUSG00000089767	4930556I23Rik		chr1	37614259	37615372	+	11	4	10	15	4	6	16	13	8	22	9	10	14	8	12	15	6	5	10
ENSMUSG00000104365	4930470B04Rik		chr1	37660722	37662647	+	0	0	1	0	0	0	3	0	1	6	1	0	0	0	0	0	0	1	0
ENSMUSG00000102650	Gm19863		chr1	37694447	37696664	-	3	4	0	6	1	0	9	0	2	2	6	4	1	3	8	0	0	2	1
ENSMUSG00000060771	Tsga10		chr1	37754776	37866429	-	230	160	168	188	111	104	138	81	101	115	119	80	110	146	174	136	51	98	202
ENSMUSG00000097268	Gm26805		chr1	37865299	37871388	+	0	1	2	0	0	0	3	0	0	0	0	1	1	1	4	0	0	1	0
ENSMUSG00000037216	Lipt1		chr1	37871738	37876228	+	143	113	128	175	79	103	145	93	104	101	90	93	79	68	105	102	79	76	101
ENSMUSG00000026088	Mitd1		chr1	37874801	37890411	-	605	562	566	672	374	440	608	517	514	432	473	402	412	452	639	584	191	385	573
ENSMUSG00000026087	Mrpl30		chr1	37890477	37898535	+	1378	1497	1291	1411	954	896	1397	1347	1348	1280	1354	1137	1042	1027	1389	1352	1044	973	1160
ENSMUSG00000061584	Lyg2		chr1	37905923	37916493	-	0	1	0	0	7	15	1068	751	922	934	578	766	614	9	60	9	15	21	33
ENSMUSG00000087374	Gm15457		chr1	37933596	37954136	+	0	0	0	0	0	0	1	0	0	0	0	2	0	0	0	0	0	0	0
ENSMUSG00000026085	Lyg1		chr1	37946736	37957759	-	0	0	0	0	0	0	0	0	3	8	1	4	2	0	0	0	0	0	0
ENSMUSG00000058407	Txndc9		chr1	37985189	37997893	-	1572	1586	1608	1611	966	1054	1877	1729	1685	1583	1672	1576	1383	1292	1543	1544	864	1046	1304
ENSMUSG00000026083	Eif5b		chr1	37998010	38055579	+	5848	6481	5877	5751	7153	3851	6297	6669	5862	5845	5897	5331	5337	4255	5567	5222	4139	3976	4395
ENSMUSG00000026082	Rev1	overlapping_locus	chr1	38052786	38129801	-	919	902	1093	981	395	584	617	568	659	724	477	511	481	714	887	890	284	501	662
ENSMUSG00000103804	Gm37062	overlapping_locus	chr1	38076295	38077305	-	25	3	22	21	10	11	16	21	20	22	9	4	10	19	20	31	2	19	16
ENSMUSG00000037138	Aff3		chr1	38177326	38664955	-	3863	2142	2981	4402	706	1123	1014	879	1138	1475	560	508	751	1477	1554	1738	752	985	1571
ENSMUSG00000085391	Gm16150		chr1	38235420	38246666	+	13	20	7	19	20	9	14	7	1	5	8	4	7	7	3	15	11	9	5
ENSMUSG00000085280	Gm16151		chr1	38307902	38311930	+	13	1	6	10	3	2	10	0	0	1	3	0	4	11	0	4	0	3	6
ENSMUSG00000087131	Gm16152		chr1	38384949	38393974	+	2	0	0	0	7	0	3	0	0	3	1	0	2	1	2	8	2	2	2
ENSMUSG00000048814	Lonrf2		chr1	38793645	38836711	-	78	49	62	90	42	49	21	38	33	38	17	19	21	33	34	48	23	31	40
ENSMUSG00000026080	Chst10		chr1	38863867	38898161	-	138	75	113	108	65	72	67	54	55	72	60	40	51	67	67	89	71	53	99
ENSMUSG00000102447	Gm6621	pseudo_consens	chr1	38907945	38908716	+	0	0	0	0	0	0	0	1	0	1	0	0	0	0	0	0	0	0	3
ENSMUSG00000026078	Pdcl3		chr1	38985608	38997238	+	1689	1618	1500	1668	1243	1114	1442	1400	1281	1358	1249	1150	1081	1190	1453	1414	874	991	1298
ENSMUSG00000103046	Gm37309		chr1	38992678	38994316	+	106	87	132	113	55	76	77	62	107	97	81	70	57	73	123	82	24	66	111
ENSMUSG00000026077	Npas2	overlapping_locus	chr1	39193731	39363236	+	236	162	296	235	194	351	79	102	50	44	148	101	55	112	199	126	194	181	136
ENSMUSG00000092553	Gm20428	pseudo_consens	chr1	39276283	39276565	-	4	0	0	7	2	0	1	0	0	0	0	0	0	0	0	1	0	0	0
ENSMUSG00000092563	Gm3617	overlapping_locus	chr1	39314899	39315453	+	4	0	3	2	14	3	0	2	2	1	5	1	0	0	0	1	5	2	3
ENSMUSG00000073702	Rpl31		chr1	39367842	39371911	+	3996	4775	4606	5333	3208	3115	4130	3579	3520	4287	4026	3257	3518	3218	4451	4114	4059	3015	4559
ENSMUSG00000003134	Tbc1d8		chr1	39371492	39478755	-	1321	1260	1402	1449	588	1060	871	637	750	727	589	657	562	1032	1161	1147	523	619	1037
ENSMUSG00000003135	Cnot11		chr1	39534992	39546889	+	1133	1265	1090	1229	496	732	1072	1029	1136	1056	907	862	721	825	1025	959	624	712	694
ENSMUSG00000085894	Gm15832	overlapping_locus	chr1	39547570	39552002	-	102	108	128	153	95	77	94	106	86	122	85	102	60	72	95	105	37	62	118
ENSMUSG00000077704	Snord89		chr1	39548745	39548854	-	14	19	19	21	15	13	14	5	6	12	9	18	9	14	8	12	2	10	21
ENSMUSG00000048234	Rnf149	overlapping_locus	chr1	39551296	39577405	-	1778	1878	1689	1821	794	1371	2049	2079	2558	2090	1759	1879	1611	1310	1827	1795	840	1180	1226
ENSMUSG00000064936	Gm23722		chr1	39573746	39573875	-	3	0	2	2	4	2	8	0	1	0	1	2	0	1	1	3	0	1	1
ENSMUSG00000102471	Gm5100	pseudo_consens	chr1	39597417	39598005	-	2	0	1	0	0	3	7	2	3	7	0	2	0	0	0	0	1	2	0
ENSMUSG00000050967	Creg2		chr1	39618406	39651474	-	28	29	35	29	7	15	12	26	23	12	10	15	7	20	15	35	4	11	14
ENSMUSG00000097083	D930019O06Rik		chr1	39650176	39657390	+	0	1	1	0	0	3	0	0	2	2	1	7	3	0	0	0	1	3	0
ENSMUSG00000057173	Rfx8		chr1	39665301	39720997	-	6	9	5	4	4	4	12	7	3	4	2	9	5	5	0	0	4	1	1
ENSMUSG00000091937	Gm3646		chr1	39804148	39805332	-	0	0	1	0	0	0	0	0	0	0	1	0	1	0	0	0	0	0	1
ENSMUSG00000101634	1700066B17Rik		chr1	39839175	39847334	-	0	0	0	0	0	0	1	0	0	0	8	0	0	0	0	0	0	0	0
ENSMUSG00000026074	Map4k4		chr1	39900913	40026310	+	8265	7555	8532	9472	4546	5862	7348	7397	7916	6871	6293	5985	5305	5913	7357	6947	3964	5114	6067
ENSMUSG00000102985	4930456G14Rik		chr1	40049039	40050368	-	12	14	11	13	7	20	7	6	6	8	8	12	2	8	12	14	3	4	18
ENSMUSG00000026073	Il1r2		chr1	40074079	40125231	+	2367	2544	2594	2341	1191	2091	1454	1315	1440	1487	1163	1249	1367	1941	2571	2371	1660	2268	2303
ENSMUSG00000097899	Gm16894		chr1	40076228	40085851	-	69	89	57	64	82	59	88	76	100	71	52	84	66	66	71	99	49	63	84
ENSMUSG00000102975	Gm37347		chr1	40088511	40091581	+	12	11	27	27	4	9	18	14	16	20	3	24	9	16	29	29	6	11	22
ENSMUSG00000026072	Il1r1		chr1	40225080	40317257	+	2410	2039	2501	2642	1164	1802	2376	1963	2025	2136	1922	1730	1430	1811	2482	1985	1113	1810	1962
ENSMUSG00000103560	Gm38070		chr1	40238020	40244499	+	4	0	4	2	3	4	0	3	1	5	0	3	0	2	0	0	0	0	2
ENSMUSG00000070942	Il1rl2		chr1	40324610	40367562	+	3369	3136	3503	3682	1563	2295	3681	3691	3281	3548	3141	2974	2753	2660	3565	3019	1312	2480	2855
ENSMUSG00000103230	Gm17970	pseudo_consens	chr1	40353852	40354536	+	143	107	133	216	85	113	136	137	106	129	62	87	79	148	244	136	40	80	157
ENSMUSG00000026069	Il1rl1		chr1	40429570	40465415	+	422	332	404	508	135	219	264	301	302	292	200	216	188	269	370	372	67	282	341
ENSMUSG00000026070	Il18r1		chr1	40465552	40500854	+	209	197	214	226	123	143	160	65	100	109	199	119	93	121	162	178	54	126	195
ENSMUSG00000026068	Il18rap		chr1	40515362	40551705	+	86	81	85	110	38	54	87	70	96	95	182	105	57	28	92	107	37	79	84
ENSMUSG00000026065	Slc9a4		chr1	40580081	40630725	+	53	33	25	50	5	19	35	16	20	25	24	16	27	41	41	14	20	26	51
ENSMUSG00000102676	Gm37435		chr1	40582895	40586841	-	0	0	0	0	1	0	0	0	0	0	0	1	0	0	0	4	0	0	0
ENSMUSG00000026062	Slc9a2		chr1	40680574	40769273	+	139	111	143	69	139	80	174	187	246	210	139	146	135	64	69	110	109	74	46
ENSMUSG00000103679	Gm37623		chr1	40691442	40697636	-	4	0	5	0	0	0	0	2	0	0	0	0	0	0	0	0	0	2	0
ENSMUSG00000103270	Gm37915		chr1	40771385	40785343	+	6	8	7	2	7	3	4	5	11	0	3	5	3	6	7	9	5	4	4
ENSMUSG00000041945	Mfsd9		chr1	40772038	40790687	-	102	96	75	147	51	98	80	53	119	86	79	67	61	122	133	80	66	102	58
ENSMUSG00000079588	Tmem182		chr1	40805601	40856887	+	1153	743	989	547	1171	565	303	395	411	372	258	259	445	424	531	748	706	640	394
ENSMUSG00000101299	Gm28175		chr1	42261855	42304412	+	0	0	0	2	0	0	1	0	0	1	0	2	0	0	0	0	0	0	0
ENSMUSG00000060424	Pantr1		chr1	42590782	42694842	-	40	30	33	49	21	29	10	10	5	6	14	4	13	29	13	27	22	14	29
ENSMUSG00000104199	4930420N18Rik		chr1	42651726	42652401	+	0	1	0	0	0	0	0	0	0	0	0	0	0	0	0	1	1	0	0
ENSMUSG00000045515	Pou3f3	overlapping_locus	chr1	42694925	42703176	+	545	434	479	596	219	305	170	146	189	192	151	97	143	370	271	414	258	218	339
ENSMUSG00000093436	Gm20646	overlapping_locus	chr1	42694925	42744791	+	0	1	1	1	0	0	1	0	0	0	0	0	0	0	0	0	2	0	1
ENSMUSG00000097063	Pantr2		chr1	42707061	42713454	-	24	33	9	23	15	9	13	9	9	7	5	2	4	21	6	21	14	7	24
ENSMUSG00000099784	Dalir		chr1	42750712	42752881	+	2	1	2	2	0	0	0	0	0	0	0	0	0	3	0	1	1	0	1
ENSMUSG00000060679	Mrps9		chr1	42851233	42905683	+	1285	1205	1236	1549	832	886	1167	1104	1102	1120	1000	849	877	874	1291	1115	824	793	920
ENSMUSG00000041907	Gpr45		chr1	42952872	43035456	+	3	9	4	7	5	4	5	0	2	2	1	6	5	2	1	12	1	2	5
ENSMUSG00000070939	Tgfbrap1		chr1	43047200	43098637	-	2416	2605	2884	2751	1027	1957	2260	2419	2634	2266	1838	1949	1627	2095	2687	2513	1379	1783	1939
ENSMUSG00000100269	Gm28782		chr1	43056267	43057134	+	0	0	0	0	0	0	0	0	3	3	0	2	0	0	1	0	0	0	1
ENSMUSG00000041878	8430432A02Rik		chr1	43092588	43093835	+	27	29	51	49	17	24	19	20	24	28	30	15	12	29	25	17	10	18	33
ENSMUSG00000010290	AI597479		chr1	43098710	43115947	+	1008	843	901	972	520	647	893	828	850	907	683	668	626	777	850	761	461	594	714
ENSMUSG00000008136	Fhl2		chr1	43123074	43196984	-	122	85	86	85	71	58	498	519	519	384	626	484	321	89	129	98	68	112	42
ENSMUSG00000094497	Gm8210		chr1	43189156	43189638	+	0	0	1	1	3	1	1	3	0	1	1	0	0	0	0	2	0	0	0
ENSMUSG00000099576	Gm29040		chr1	43250156	43302925	-	0	0	0	0	0	0	5	0	3	2	0	1	1	0	0	1	0	0	0
ENSMUSG00000066877	Nck2	overlapping_locus	chr1	43444579	43570515	+	861	865	924	1055	497	631	952	783	946	860	774	708	625	749	867	749	432	523	674
ENSMUSG00000103422	Gm37536	overlapping_locus	chr1	43488447	43490937	+	0	0	1	0	0	1	3	0	0	2	0	0	2	3	0	0	0	0	0
ENSMUSG00000103945	Gm38228	overlapping_locus	chr1	43560273	43561565	+	28	11	30	36	10	23	26	39	27	38	20	29	21	18	42	23	9	11	23
ENSMUSG00000026051	Ecrg4		chr1	43730602	43742578	+	955	672	710	869	656	400	345	195	359	309	261	163	301	445	433	520	625	334	433
ENSMUSG00000100764	Gm29155		chr1	43741961	43743895	-	8	11	15	14	5	10	2	1	3	19	6	7	7	11	15	20	5	9	4
ENSMUSG00000100635	Gm29157		chr1	43742915	43743526	+	22	3	4	11	14	3	7	3	20	4	5	1	11	7	2	8	10	8	4
ENSMUSG00000100480	Gm29156		chr1	43745784	43746282	-	18	23	38	22	16	16	25	26	27	15	9	2	10	13	13	13	7	7	9
ENSMUSG00000057363	Uxs1		chr1	43746966	43827800	-	772	795	656	873	589	617	727	738	689	719	582	572	564	544	708	751	491	531	548
ENSMUSG00000090243	Gm16103	pseudo_consens	chr1	43785910	43787188	+	0	1	0	2	0	0	0	3	0	0	3	0	0	0	0	0	1	2	2
ENSMUSG00000100701	Gm19587	pseudo_consens	chr1	43888051	43888595	+	2	3	2	2	1	0	1	2	1	0	1	0	0	2	0	1	1	0	1
ENSMUSG00000041763	Tpp2		chr1	43933647	44003000	+	1890	1654	1864	1804	771	1250	2613	2726	2553	2348	1911	2324	1918	1647	1930	1852	614	1418	1357
ENSMUSG00000047343	Mettl21c	overlapping_locus	chr1	44009408	44020034	-	7	6	11	5	15	7	19	14	12	8	7	12	2	14	11	10	6	8	13
ENSMUSG00000091844	Gm8251		chr1	44055872	44079746	-	8	3	9	8	1	2	18	1	17	7	5	7	4	9	7	5	0	5	10
ENSMUSG00000026049	Tex30	overlapping_locus	chr1	44086613	44102441	-	161	265	165	183	92	123	170	187	160	188	211	172	126	110	134	129	67	110	129
ENSMUSG00000026047	Poglut2	overlapping_locus	chr1	44106546	44118808	-	463	504	487	574	214	327	406	421	321	427	339	342	327	357	404	333	215	278	374
ENSMUSG00000041684	Bivm		chr1	44118957	44144770	+	537	549	527	652	225	372	498	403	384	473	359	338	344	428	527	408	231	297	427
ENSMUSG00000026048	Ercc5		chr1	44147744	44181260	+	1478	1502	1300	1732	895	1030	1239	1219	1181	1108	970	1064	913	1091	1351	1248	590	906	1119
ENSMUSG00000046828	Mettl21e		chr1	44204070	44218961	-	39	15	18	6	4	3	3	7	14	16	2	2	9	4	16	11	7	4	10
ENSMUSG00000089703	Gm15833	pseudo_consens	chr1	44212162	44213118	+	0	0	5	0	3	2	1	1	0	0	1	0	1	0	2	0	3	4	2
ENSMUSG00000100769	Gm28893		chr1	44392809	44394447	+	1	0	5	0	0	0	0	0	0	0	2	1	0	0	0	0	0	0	0
ENSMUSG00000101567	Txn-ps1	pseudo_consens	chr1	44463923	44464231	-	1	1	3	0	2	4	1	2	6	2	1	3	2	0	2	1	2	3	2
ENSMUSG00000056870	Gulp1	overlapping_locus	chr1	44551511	44796838	+	731	520	832	786	309	413	390	321	420	377	245	292	248	410	473	534	155	456	521
ENSMUSG00000102319	Gm37626	overlapping_locus	chr1	44560885	44565447	+	22	20	17	20	83	14	3	8	5	7	9	3	12	20	13	10	41	7	18
ENSMUSG00000089877	Gm16102	overlapping_locus	chr1	44644279	44644698	+	3	8	8	2	17	1	1	4	12	0	4	4	3	6	6	2	12	4	4
ENSMUSG00000101701	4930521E06Rik		chr1	44739676	44744949	-	0	4	7	1	0	0	0	0	2	4	2	1	0	0	0	0	0	0	0
ENSMUSG00000103071	Gm38110	overlapping_locus	chr1	44756942	44758492	+	0	0	0	1	0	0	0	0	0	1	1	0	0	0	0	0	0	0	1
ENSMUSG00000026043	Col3a1	ncRNA_host	chr1	45311538	45349706	+	48540	47383	59428	89092	34667	78829	87139	52194	75221	77148	79363	58304	48629	43222	39715	47806	30973	32063	24502
ENSMUSG00000026042	Col5a2	overlapping_locus	chr1	45374321	45503282	-	8010	6098	7646	8486	3645	5683	7140	5264	7017	6424	5647	4728	4613	4974	5438	5878	3000	3795	4108
ENSMUSG00000104476	Gm38211	overlapping_locus	chr1	45485836	45493052	-	43	32	40	23	130	19	26	13	19	27	22	22	20	10	37	18	53	19	13
ENSMUSG00000100361	Gm7063	pseudo_consens	chr1	45519774	45520754	-	0	0	0	0	1	0	5	0	0	0	0	0	0	0	0	0	0	0	1
ENSMUSG00000065255	Gm23974		chr1	45746895	45747025	+	0	2	1	0	2	0	0	0	0	0	0	0	0	0	0	0	0	0	1
ENSMUSG00000100843	Gm8307	pseudo_consens	chr1	45768337	45769486	+	0	4	4	0	2	4	6	1	6	8	1	0	0	4	1	3	0	1	4
ENSMUSG00000025995	Wdr75		chr1	45795166	45823619	+	1257	1440	1309	1460	643	918	1322	1483	1348	1199	1160	1163	987	1012	1522	1178	492	924	1047
ENSMUSG00000099850	Gm28906		chr1	45833800	45836788	-	0	0	0	0	0	0	1	0	1	0	0	1	0	0	1	5	0	0	0
ENSMUSG00000084817	Gm5526	pseudo_consens	chr1	45857332	45857754	-	37	85	68	56	79	31	86	121	95	86	83	52	68	31	63	83	94	50	65
ENSMUSG00000098549	Gm5269		chr1	45889525	45890273	-	4	6	11	18	2	3	15	1	9	1	7	15	9	1	17	16	1	5	4
ENSMUSG00000099381	Gm18303	pseudo_consens	chr1	45905623	45906798	+	6	17	25	13	0	9	2	1	6	0	1	3	3	26	3	5	1	5	11
ENSMUSG00000025993	Slc40a1		chr1	45908068	45926523	-	2310	2434	2718	3067	566	1649	3228	2506	3797	2674	1800	2424	2231	2125	2304	2418	504	1362	2081
ENSMUSG00000070896	Rpl23a-ps1	pseudo_consens	chr1	45981548	45982012	+	0	0	1	0	0	0	0	0	0	0	1	0	0	0	0	0	0	0	0
ENSMUSG00000044457	Stk-ps2		chr1	46020072	46030469	-	0	0	0	0	0	1	2	0	2	0	0	0	0	0	0	0	0	0	0
ENSMUSG00000041144	Dnah7b		chr1	46066315	46373550	+	51	34	60	87	32	22	16	23	43	23	17	23	16	34	39	50	15	17	34
ENSMUSG00000101262	Gm8326	pseudo_consens	chr1	46414502	46416932	+	0	0	1	2	2	0	0	6	1	0	0	2	3	0	5	0	0	1	1
ENSMUSG00000101337	Dnah7c		chr1	46425592	46807476	+	17	7	6	4	3	2	15	4	9	10	15	15	12	13	13	7	5	2	7
ENSMUSG00000025986	Slc39a10	overlapping_locus	chr1	46807544	46892852	-	1332	1155	1446	1692	515	984	2633	2070	2270	2513	1538	1897	1345	1148	1372	1264	419	815	1119
ENSMUSG00000100213	Gm28151	overlapping_locus	chr1	46849529	46850479	-	84	101	142	172	80	78	149	111	118	108	70	66	91	166	150	85	31	47	168
ENSMUSG00000103129	Gm37393	overlapping_locus	chr1	46877203	46881072	-	2	0	0	1	0	0	3	0	0	2	0	0	0	0	1	0	0	1	0
ENSMUSG00000100160	Gm28527	pseudo_consens	chr1	46896583	46896879	-	9	4	5	10	4	3	8	4	3	4	11	2	4	1	6	6	0	4	3
ENSMUSG00000100033	Gm8337	pseudo_consens	chr1	47657693	47659630	+	6	1	1	1	0	1	0	0	0	8	2	3	0	0	1	1	0	0	2
ENSMUSG00000097883	Gm8357	pseudo_consens	chr1	48881713	48882723	+	1	0	0	2	0	0	0	0	1	1	0	0	0	0	0	1	1	0	0
ENSMUSG00000026109	Tmeff2	overlapping_locus	chr1	50900647	51187270	+	233	286	242	320	47	105	265	230	232	278	108	131	234	194	267	212	50	148	238
ENSMUSG00000100671	Gm28322	overlapping_locus	chr1	50904444	50905918	+	0	0	3	1	0	0	12	10	0	3	3	13	1	3	3	0	0	3	6
ENSMUSG00000101242	Gm28319		chr1	51138281	51141222	-	1	3	2	1	0	3	0	0	0	0	0	0	1	0	4	0	4	0	6
ENSMUSG00000099924	Gm28320	overlapping_locus	chr1	51148309	51150581	+	4	9	1	9	11	1	10	4	2	10	1	3	6	4	12	11	5	3	2
ENSMUSG00000099625	Gm29325		chr1	51195221	51197748	+	1	1	0	0	1	2	0	0	1	0	2	0	0	0	3	0	1	0	0
ENSMUSG00000101799	9330175M20Rik	overlapping_locus	chr1	51218386	51333779	-	0	0	0	5	1	1	0	0	0	0	0	2	0	0	1	2	0	0	0
ENSMUSG00000045954	Cavin2		chr1	51289126	51302960	+	1953	1239	1842	1595	841	900	708	621	1042	846	545	612	767	986	1128	1332	501	1115	1300
ENSMUSG00000099741	Gm5253	overlapping_locus	chr1	51317528	51318552	-	0	0	0	0	0	3	3	0	0	1	0	0	0	0	0	0	0	0	0
ENSMUSG00000101702	1700072G22Rik		chr1	51457932	51458931	-	4	1	5	3	0	0	5	0	5	0	0	5	3	0	14	0	0	0	4
ENSMUSG00000026107	Nabp1		chr1	51465862	51478425	-	966	1030	1093	1231	503	909	2011	1967	1388	1657	1287	1629	1145	1272	1771	1270	337	1155	1341
ENSMUSG00000099413	Gm17767	overlapping_locus	chr1	51507086	51596718	-	16	18	15	15	6	14	9	3	27	25	13	19	25	10	7	18	3	11	12
ENSMUSG00000101741	Gm28055		chr1	51696324	51746943	-	3	0	0	3	0	0	6	0	0	0	0	1	0	2	0	0	1	0	0
ENSMUSG00000018417	Myo1b	overlapping_locus	chr1	51749765	51916071	-	1664	1478	1516	1651	599	943	1999	1805	1934	1621	1631	1603	1340	1026	1443	1386	484	885	838
ENSMUSG00000101724	Gm29453	overlapping_locus	chr1	51847840	51849118	-	0	0	1	0	2	0	1	0	0	0	1	0	0	0	0	0	0	0	0
ENSMUSG00000100696	Gm8419	pseudo_consens	chr1	51938254	51938665	-	0	0	0	1	0	0	0	3	0	0	2	0	0	0	0	1	0	0	0
ENSMUSG00000099135	Gm27607		chr1	51938974	51939095	-	0	0	0	1	0	1	0	0	0	0	0	0	0	0	0	3	0	1	0
ENSMUSG00000072324	Gm8420	pseudo_consens	chr1	51940664	51941261	-	0	2	0	1	0	1	2	0	1	0	1	0	1	0	0	0	0	0	0
ENSMUSG00000062939	Stat4	overlapping_locus	chr1	51987148	52107189	+	10	16	11	13	4	5	13	7	5	12	16	11	7	1	2	15	4	8	9
ENSMUSG00000101628	Gm28177	overlapping_locus	chr1	52077261	52156087	+	0	0	1	3	1	1	0	0	0	1	0	0	2	0	0	0	0	0	2
ENSMUSG00000078291	Gm3940	pseudo_consens	chr1	52090635	52091066	-	0	0	0	0	0	0	0	0	0	1	1	0	1	0	0	0	0	0	0
ENSMUSG00000109599	Gm31812		chr1	52108121	52113751	-	14	22	10	6	5	7	4	9	3	5	3	2	4	9	5	11	3	6	12
ENSMUSG00000026104	Stat1	overlapping_locus	chr1	52119440	52161865	+	591	794	741	707	594	393	870	895	598	524	607	447	567	634	704	957	386	360	659
ENSMUSG00000099569	Gm18301	pseudo_consens	chr1	52134443	52135330	-	1	1	0	0	3	0	0	0	2	0	1	0	0	0	0	0	0	0	1
ENSMUSG00000026103	Gls		chr1	52163448	52233232	-	4310	3808	4773	4954	1960	2562	3175	3075	2858	3027	2342	2303	2216	3295	3939	3494	1156	2499	3307
ENSMUSG00000002881	Nab1		chr1	52457294	52500679	-	3219	3187	3669	3634	1568	2265	4197	3913	4241	3714	3461	3352	2851	2619	3388	3231	1228	2420	2565
ENSMUSG00000097833	Gm5976	pseudo_consens	chr1	52503234	52504229	-	14	33	40	30	7	13	29	14	12	33	13	18	21	13	12	11	7	9	14
ENSMUSG00000101501	Rps27a-ps1	pseudo_consens	chr1	52522239	52522701	+	7	4	5	23	6	3	5	5	1	9	0	10	2	10	6	13	3	2	15
ENSMUSG00000100120	Gm553		chr1	52522902	52582679	+	8	11	9	27	13	10	5	0	11	4	5	1	3	3	6	15	5	5	7
ENSMUSG00000099878	Gm28178		chr1	52570014	52580291	-	9	4	2	1	2	6	0	6	2	2	7	4	5	3	0	2	3	2	1
ENSMUSG00000100007	Gm5527	pseudo_consens	chr1	52584518	52585159	+	0	11	1	3	3	1	0	0	5	6	3	5	5	1	0	2	4	1	4
ENSMUSG00000043015	Nemp2		chr1	52630703	52651919	+	684	612	754	855	364	392	644	550	591	622	423	384	499	657	675	563	223	347	625
ENSMUSG00000103630	Gm37242		chr1	52653808	52655892	-	3	3	14	10	16	8	10	6	12	2	3	3	7	9	6	14	2	6	1
ENSMUSG00000041439	Mfsd6	overlapping_locus	chr1	52656286	52727462	-	5026	4803	5036	5544	1686	3312	4804	5117	5229	4373	3430	3910	3491	4021	4709	4754	1700	3020	3137
ENSMUSG00000100302	Gm29670	overlapping_locus	chr1	52702272	52704762	-	0	0	0	2	1	0	7	2	0	0	2	0	2	0	0	0	0	1	2
ENSMUSG00000100230	Gm28650	pseudo_consens	chr1	52756719	52757129	+	0	0	0	0	0	0	0	0	0	0	0	0	0	0	1	0	0	1	0
ENSMUSG00000026102	Inpp1		chr1	52785427	52817688	-	697	603	737	742	442	402	469	365	394	396	313	258	290	418	549	575	241	336	435
ENSMUSG00000041426	Hibch		chr1	52844929	52920986	+	879	889	1030	1081	565	634	730	673	792	726	521	521	627	731	766	838	348	565	693
ENSMUSG00000043629	1700019D03Rik		chr1	52922324	53020179	-	158	208	146	110	85	105	100	66	74	93	70	63	80	105	153	129	69	100	118
ENSMUSG00000026100	Mstn		chr1	53061640	53068079	+	325	259	320	174	468	156	88	121	110	102	54	52	172	130	148	189	116	170	80
ENSMUSG00000060715	1700019A02Rik		chr1	53158577	53187636	-	0	0	0	0	1	0	0	0	0	0	1	0	0	0	1	0	0	0	1
ENSMUSG00000026098	Pms1		chr1	53189187	53297018	-	142	192	157	206	103	163	174	185	209	195	157	153	124	124	158	185	48	112	142
ENSMUSG00000100763	Gm28777		chr1	53196113	53197695	+	0	0	4	2	2	1	2	0	1	1	2	4	0	0	0	1	2	0	3
ENSMUSG00000026097	Ormdl1	overlapping_locus	chr1	53297095	53310309	+	423	449	485	512	223	294	391	379	361	380	265	313	311	372	436	341	162	304	407
ENSMUSG00000100679	Gm28778	overlapping_locus	chr1	53297111	53318035	+	8	1	3	2	0	0	1	5	2	5	4	0	0	5	1	0	0	1	5
ENSMUSG00000026096	Osgepl1	overlapping_locus	chr1	53313624	53326343	+	448	437	406	502	277	290	333	263	259	335	202	234	260	317	371	336	124	251	340
ENSMUSG00000099913	Gm28551	overlapping_locus	chr1	53325507	53352667	-	19	10	15	15	10	14	12	19	5	22	4	9	10	14	13	6	1	8	13
ENSMUSG00000101838	Gm18800	overlapping_locus	chr1	53326206	53342186	-	0	10	3	9	1	0	1	0	0	0	0	0	0	1	4	0	0	0	0
ENSMUSG00000026095	Asnsd1	overlapping_locus	chr1	53344617	53352752	-	282	348	324	377	332	255	302	210	250	280	260	294	250	237	279	269	248	245	312
ENSMUSG00000096141	Dnah7a	ncRNA_host	chr1	53397006	53706784	-	4	0	0	5	6	4	0	2	8	3	1	3	0	5	2	0	0	2	3
ENSMUSG00000026094	Stk17b		chr1	53755506	53785224	-	1487	1390	1500	1688	572	974	1367	1246	1188	1234	1296	1218	951	941	1440	1272	534	1106	1308
ENSMUSG00000042807	Hecw2	overlapping_locus	chr1	53806876	54195168	-	277	263	311	329	109	155	182	174	228	188	133	150	150	170	167	243	71	175	194
ENSMUSG00000102868	Gm37633	overlapping_locus	chr1	54152397	54155096	-	0	0	0	0	0	0	0	0	1	0	0	1	0	1	0	0	0	0	0
ENSMUSG00000025983	Ccdc150		chr1	54250683	54368727	+	22	25	27	16	11	11	18	10	3	17	22	14	8	9	15	11	7	17	5
ENSMUSG00000041303	Gtf3c3		chr1	54396004	54438971	-	717	714	757	769	357	508	685	631	776	687	561	543	549	624	703	591	325	413	532
ENSMUSG00000073678	Pgap1	overlapping_locus	chr1	54472994	54557684	-	1718	1578	1949	1807	594	1166	1209	1232	1188	1085	738	837	814	1673	1646	1596	407	996	1247
ENSMUSG00000104136	Gm36955	overlapping_locus	chr1	54518610	54520270	-	4	2	2	1	2	1	1	1	0	3	0	1	6	7	2	1	2	3	6
ENSMUSG00000101130	Gm19637	pseudo_consens	chr1	54566703	54567281	+	0	3	0	1	0	0	0	0	0	0	0	1	0	3	0	0	0	0	0
ENSMUSG00000052331	Ankrd44	overlapping_locus	chr1	54645340	54926387	-	1704	1501	1782	1977	668	1104	1035	1042	1113	1026	833	1030	761	1051	1490	1452	563	993	1204
ENSMUSG00000101674	4930444A19Rik		chr1	54681729	54767524	+	7	2	4	0	0	5	1	1	7	1	1	3	2	1	2	3	0	3	4
ENSMUSG00000102503	Gm37370	overlapping_locus	chr1	54737166	54738575	-	13	3	9	6	5	14	11	5	14	8	12	11	5	6	5	17	8	7	9
ENSMUSG00000102642	A130048G24Rik	overlapping_locus	chr1	54913845	54916594	-	1	0	0	0	8	0	0	2	0	4	2	2	2	0	0	4	1	2	1
ENSMUSG00000025982	Sf3b1		chr1	54985169	55027481	-	11952	10840	12318	12930	5155	7438	9773	8868	9873	9350	7604	7458	6932	8550	10076	10530	3362	6769	9490
ENSMUSG00000103030	E330011M16Rik		chr1	55051319	55053112	-	24	10	19	12	11	9	6	23	30	15	11	16	10	12	16	40	22	18	18
ENSMUSG00000025981	Coq10b	overlapping_locus	chr1	55052770	55072702	+	678	591	676	805	304	383	589	677	693	506	521	516	464	467	599	503	250	436	452
ENSMUSG00000101122	Gm17971	overlapping_locus	chr1	55066264	55067069	+	55	46	50	71	27	24	48	34	34	30	29	19	31	42	27	33	14	23	37
ENSMUSG00000025980	Hspd1		chr1	55077835	55088243	-	3093	3040	3068	3161	1792	2044	3873	4083	3449	3441	3623	2867	2759	2453	3151	2836	1635	2066	2186
ENSMUSG00000073676	Hspe1		chr1	55088132	55091307	+	1111	1156	1009	1369	915	701	1355	1426	1392	1504	1404	1000	1094	795	1177	1123	922	779	1022
ENSMUSG00000100736	Gm5147	pseudo_consens	chr1	55120080	55120873	-	0	1	2	10	0	3	6	5	8	1	3	0	4	0	13	13	0	2	4
ENSMUSG00000089670	Gm16581	pseudo_consens	chr1	55127297	55128287	+	7	4	12	15	0	2	4	9	12	5	2	3	5	6	27	5	1	7	4
ENSMUSG00000025979	Mob4		chr1	55131231	55154899	+	2434	2612	2530	2848	1583	1656	2532	2464	2278	2342	1881	1930	1917	1888	2441	2296	957	1698	2012
ENSMUSG00000061863	Gm6822		chr1	55160747	55161053	-	6	14	18	22	6	13	14	17	5	9	9	14	10	3	18	5	9	6	11
ENSMUSG00000025978	Rftn2		chr1	55170159	55226782	-	1088	861	994	1309	675	624	485	480	470	509	371	329	383	636	623	667	817	563	721
ENSMUSG00000097649	Gm10561		chr1	55226251	55235622	+	103	76	86	97	99	51	56	48	39	45	38	31	51	67	53	50	74	40	59
ENSMUSG00000046994	Mars2		chr1	55237177	55248470	+	540	594	544	639	232	378	702	631	524	603	509	440	366	406	663	457	214	335	513
ENSMUSG00000025977	Boll		chr1	55248658	55363469	-	3	4	4	25	18	3	11	4	5	7	7	3	4	2	0	10	13	2	4
ENSMUSG00000100215	Gm8292	pseudo_consens	chr1	55335401	55335796	+	9	8	9	8	8	4	2	1	4	0	3	0	6	2	2	1	1	5	7
ENSMUSG00000038349	Plcl1	overlapping_locus	chr1	55405921	55754285	+	231	205	228	234	107	126	135	121	200	131	106	96	109	109	117	177	98	114	152
ENSMUSG00000102145	Gm38056	overlapping_locus	chr1	55440904	55445930	+	2	7	0	0	2	1	0	4	1	2	3	3	1	2	0	1	0	0	2
ENSMUSG00000099950	9130227L01Rik		chr1	55931241	55972328	+	0	0	0	0	1	0	0	0	0	0	0	0	0	0	1	0	0	0	0
ENSMUSG00000038331	Satb2	overlapping_locus	chr1	56793981	56978650	-	58	27	25	26	8	22	67	45	47	48	35	57	34	34	32	29	17	22	26
ENSMUSG00000087022	9130024F11Rik	overlapping_locus	chr1	56971412	57050084	+	3	7	8	21	8	10	8	17	15	6	16	8	10	11	16	11	4	9	6
ENSMUSG00000101129	Gm5254	pseudo_consens	chr1	57291425	57292401	-	0	0	1	0	0	0	0	0	0	0	1	0	0	0	0	0	0	0	0
ENSMUSG00000097519	4930558J18Rik		chr1	57359222	57377544	-	3	4	4	3	2	4	9	9	14	2	13	16	6	6	2	1	8	4	2
ENSMUSG00000038323	1700066M21Rik		chr1	57377620	57385423	+	266	222	255	261	98	183	320	296	316	328	306	301	192	233	204	234	88	209	194
ENSMUSG00000048495	Tyw5		chr1	57388237	57407101	-	222	195	220	215	108	121	229	185	205	255	159	188	154	118	175	176	55	126	178
ENSMUSG00000025971	Maip1		chr1	57406328	57417953	+	432	430	408	428	215	297	419	325	356	292	330	262	295	296	348	441	266	286	313
ENSMUSG00000038305	Spats2l		chr1	57774162	57948394	+	696	632	625	761	264	452	449	452	545	425	323	297	370	448	566	624	367	368	459
ENSMUSG00000054770	Kctd18		chr1	57955101	58018956	-	1206	1262	1114	1496	637	793	1058	870	1192	906	768	797	698	802	1235	1174	442	648	870
ENSMUSG00000026039	Sgo2a		chr1	57995971	58025899	+	68	96	94	82	57	66	187	194	240	206	205	147	116	74	103	74	37	82	67
ENSMUSG00000063558	Aox1		chr1	58029931	58106413	+	2576	1772	2019	2678	846	1063	718	702	1055	824	410	479	668	1014	1576	1880	531	858	1252
ENSMUSG00000064294	Aox3		chr1	58113130	58200698	+	141	95	106	226	62	77	63	72	122	90	70	61	77	70	141	155	56	86	133
ENSMUSG00000038242	Aox4		chr1	58210397	58268597	+	411	738	617	1017	518	855	10249	10856	9856	8479	6686	8630	7242	2686	5654	2696	1450	2911	1748
ENSMUSG00000089822	Gm15759		chr1	58254117	58315656	-	25	34	21	35	9	14	176	154	111	118	71	81	71	42	85	32	1	43	46
ENSMUSG00000079554	Aox2		chr1	58278326	58380259	+	49	69	81	91	41	58	40	47	46	44	32	35	33	46	107	51	38	55	59
ENSMUSG00000103839	Gm37607		chr1	58383512	58386134	-	77	99	86	103	94	59	97	113	44	74	64	65	78	101	68	73	36	39	108
ENSMUSG00000051223	Bzw1		chr1	58392898	58407353	+	7169	7177	7270	7467	3791	5386	9091	10178	9282	9013	9893	8548	6636	5477	7668	6492	3306	5974	5444
ENSMUSG00000026034	Clk1		chr1	58410189	58424066	-	9882	9117	10016	11219	6493	6866	9396	8044	7921	8256	6425	7124	6904	7113	10173	8197	2368	5852	9756
ENSMUSG00000026035	Ppil3		chr1	58430994	58445486	-	509	405	539	578	358	320	556	554	464	439	428	364	375	326	497	457	297	301	425
ENSMUSG00000026036	Nif3l1		chr1	58445151	58481816	+	596	651	637	730	295	473	759	674	622	607	586	594	518	466	555	558	405	448	461
ENSMUSG00000026037	Orc2	ncRNA_host	chr1	58462771	58505109	-	947	872	857	993	538	659	942	1001	882	886	827	717	606	642	954	659	412	633	615
ENSMUSG00000094245	Gm23966		chr1	58466515	58466621	-	9	28	8	8	12	7	8	11	5	4	10	7	6	6	4	6	6	3	12
ENSMUSG00000085054	Gm15834		chr1	58505148	58523230	+	31	46	67	36	29	34	28	49	35	35	24	19	26	55	24	44	12	20	29
ENSMUSG00000038174	Fam126b		chr1	58522806	58586323	-	1134	909	1291	1334	558	754	835	882	904	946	636	729	613	822	1155	965	288	678	948
ENSMUSG00000026032	Ndufb3		chr1	58586384	58595964	+	1470	1594	1229	1553	1994	930	1458	1191	1363	1425	1346	1122	1102	961	1436	1271	1171	1060	1165
ENSMUSG00000100202	Gm29389	pseudo_consens	chr1	58625214	58625565	-	0	0	0	0	1	0	0	0	3	0	0	0	0	0	0	0	0	0	0
ENSMUSG00000059647	Cbx3-ps7		chr1	58646688	58647239	+	0	0	0	2	1	2	5	1	1	1	1	1	0	3	0	0	0	1	0
ENSMUSG00000047528	Flacc1		chr1	58646903	58695989	-	67	68	48	67	24	40	25	38	46	32	24	33	39	59	74	59	17	32	47
ENSMUSG00000102059	Gm20257		chr1	58652641	58655831	+	166	143	165	192	120	99	68	74	78	80	60	70	67	107	102	126	58	75	126
ENSMUSG00000026031	Cflar		chr1	58711508	58758884	+	2804	2508	3073	3203	1296	1724	2641	2409	2186	2399	1770	1885	1831	2392	2701	2400	927	1756	2296
ENSMUSG00000026029	Casp8	overlapping_locus	chr1	58795374	58847503	+	920	938	1138	1167	531	708	1247	1108	1051	1048	922	780	801	845	943	1007	445	739	877
ENSMUSG00000102719	Gm37760	overlapping_locus	chr1	58797783	58801623	+	51	34	26	33	74	17	34	43	23	37	33	22	16	14	51	40	43	15	30
ENSMUSG00000099719	Gm28802		chr1	58850085	58892792	-	31	94	84	81	60	45	88	95	105	73	134	104	72	35	52	39	63	51	55
ENSMUSG00000026028	Trak2		chr1	58900449	58973430	-	2497	2246	2668	2617	1225	1628	2534	2485	2342	2422	2070	2123	1743	1752	2295	2056	1000	1655	1828
ENSMUSG00000026027	Stradb		chr1	58973522	58995715	+	671	596	698	664	396	432	572	505	537	496	433	451	419	467	618	568	364	480	595
ENSMUSG00000072295	C2cd6		chr1	58997116	59094900	-	0	1	0	2	5	1	3	3	0	0	0	1	1	0	1	2	0	0	1
ENSMUSG00000099752	Gm29018		chr1	59014224	59059481	+	3	4	0	0	0	1	1	0	4	6	0	6	1	0	0	1	0	2	0
ENSMUSG00000038079	Tmem237		chr1	59100590	59120408	-	360	379	356	467	229	292	361	365	383	301	274	336	250	312	365	336	161	307	290
ENSMUSG00000097573	G730003C15Rik		chr1	59119833	59122141	+	53	76	78	65	39	54	53	62	55	67	35	41	34	74	62	37	37	47	53
ENSMUSG00000079550	Mpp4	overlapping_locus	chr1	59120935	59163389	-	3	5	8	23	6	12	4	14	15	4	5	9	10	18	15	16	1	9	7
ENSMUSG00000101586	Gm29017	overlapping_locus	chr1	59151047	59169320	+	27	38	39	51	18	25	9	17	21	32	16	18	26	23	25	28	7	16	32
ENSMUSG00000026024	Als2	overlapping_locus	chr1	59162926	59237231	-	1071	894	975	1106	542	779	893	924	973	814	700	706	613	816	979	891	490	684	718
ENSMUSG00000026023	Cdk15		chr1	59256906	59352993	+	51	63	97	116	46	40	92	37	66	97	52	64	73	72	50	81	35	33	60
ENSMUSG00000099922	Gm29016		chr1	59378930	59392299	+	3	1	5	2	0	2	13	3	4	4	2	5	3	4	2	1	0	1	3
ENSMUSG00000104502	Gm37737		chr1	59447865	59449502	-	3	8	5	8	7	7	3	8	2	10	0	5	3	3	0	2	0	4	2
ENSMUSG00000041075	Fzd7		chr1	59482424	59486955	+	3352	3047	3434	3636	1521	2214	3076	2597	3050	2783	2044	2163	2248	2426	2854	2876	1738	1928	2142
ENSMUSG00000097819	Gm26813		chr1	59488480	59492605	-	140	150	139	138	116	134	112	110	204	139	129	133	109	57	126	117	192	97	61
ENSMUSG00000047361	Gm973	ncRNA_host	chr1	59516264	59636417	+	664	689	623	835	424	353	505	373	495	423	280	337	353	415	406	367	339	208	422
ENSMUSG00000099811	Gm28411	overlapping_locus	chr1	59532991	59549521	-	0	1	5	0	1	3	1	0	0	0	0	3	0	0	0	0	0	0	1
ENSMUSG00000026021	Sumo1	overlapping_locus	chr1	59586558	59670834	-	1445	1812	1656	1839	1223	992	1578	1643	1575	1460	1331	1212	1232	1200	1546	1622	685	990	1484
ENSMUSG00000103821	D430013B06Rik	overlapping_locus	chr1	59646200	59648071	-	38	38	87	66	21	38	41	46	38	57	25	21	21	38	62	45	6	19	46
ENSMUSG00000101400	Gm29596	pseudo_consens	chr1	59673241	59673625	+	0	0	3	1	0	1	10	11	4	3	5	2	4	1	6	1	2	3	6
ENSMUSG00000026020	Nop58	ncRNA_host	chr1	59684971	59719044	+	2167	2344	2178	2236	1998	1535	2773	2988	2642	2796	2871	2331	1971	1761	2392	2305	1124	1520	1449
ENSMUSG00000077345	Snord70		chr1	59691934	59692020	+	4	0	0	2	1	1	0	2	8	11	1	2	1	1	6	2	0	3	3
ENSMUSG00000089512	Gm26287		chr1	59704258	59704338	+	5	0	1	0	1	2	0	1	2	8	4	4	1	0	9	4	0	5	1
ENSMUSG00000089093	Snord11		chr1	59704790	59704873	+	1	0	2	2	0	0	0	1	1	6	0	2	0	1	0	0	0	0	3
ENSMUSG00000067336	Bmpr2	overlapping_locus	chr1	59763400	59879014	+	6268	5480	6903	6362	2373	4010	5628	5043	5642	4810	3921	4321	3738	4728	5371	5576	1850	3545	3733
ENSMUSG00000104052	Gm38125	overlapping_locus	chr1	59801263	59804700	+	1	0	3	1	5	1	0	4	6	1	1	2	1	0	5	0	2	1	2
ENSMUSG00000103131	Gm37977		chr1	59886969	59887689	-	0	0	1	0	1	0	4	0	0	0	0	0	0	0	0	0	0	0	0
ENSMUSG00000041040	Fam117b	overlapping_locus	chr1	59913006	59985346	+	2009	1749	1862	1961	749	1181	1620	1454	1848	1632	1222	1185	1163	1384	1554	1626	926	1095	1227
ENSMUSG00000103696	Gm37531	overlapping_locus	chr1	59929688	59935102	+	2	3	4	0	59	3	7	1	3	2	0	3	5	9	0	2	13	0	5
ENSMUSG00000100901	Gm18829	overlapping_locus	chr1	59950403	59952464	-	3	0	0	0	0	2	0	0	0	0	1	1	0	0	3	9	0	0	2
ENSMUSG00000026018	Ica1l		chr1	59982490	60043184	-	42	32	29	57	21	16	71	41	53	46	50	38	39	20	17	26	11	19	21
ENSMUSG00000026019	Wdr12		chr1	60069785	60098645	-	598	656	552	674	426	498	845	908	791	811	856	700	594	465	722	616	372	485	574
ENSMUSG00000026017	Carf	overlapping_locus	chr1	60098247	60153953	+	510	589	616	703	286	356	516	372	412	434	367	369	321	563	590	513	179	282	512
ENSMUSG00000082609	Gm15464	overlapping_locus	chr1	60117255	60117685	+	0	5	0	1	3	3	1	2	1	0	2	4	6	0	3	0	3	1	3
ENSMUSG00000073664	Nbeal1		chr1	60180599	60338328	+	1576	1135	2020	2135	682	1045	1236	940	1086	1051	741	734	681	1141	1496	1233	365	1054	1413
ENSMUSG00000049439	Cyp20a1	overlapping_locus	chr1	60343323	60388060	+	748	635	618	754	415	501	478	427	508	480	344	368	392	522	680	640	364	510	520
ENSMUSG00000103822	6030460B20Rik	overlapping_locus	chr1	60353119	60354176	+	12	1	10	1	26	4	4	2	7	4	2	3	3	2	4	9	12	3	7
ENSMUSG00000026782	Abi2		chr1	60409619	60481158	+	957	832	983	907	568	648	719	766	808	716	603	600	521	539	908	809	445	663	597
ENSMUSG00000026014	Raph1	overlapping_locus	chr1	60482292	60567104	-	3823	2650	3665	3552	1823	2383	2600	2318	2623	2556	1887	1853	1762	2785	2847	2971	1533	1962	2402
ENSMUSG00000081562	Gm11575	overlapping_locus	chr1	60522839	60523066	-	0	1	8	2	3	1	0	1	2	1	2	0	1	0	1	1	0	4	3
ENSMUSG00000101188	Eif4a-ps4		chr1	60703932	60705149	+	131	122	126	119	83	109	150	165	183	187	155	143	149	95	175	119	67	91	116
ENSMUSG00000026012	Cd28		chr1	60716800	60773359	+	142	76	139	138	68	77	72	89	76	127	68	66	84	93	106	116	78	106	94
ENSMUSG00000086795	Gm11579	overlapping_locus	chr1	60776665	60781834	-	0	0	0	0	0	0	0	0	0	0	0	0	0	0	0	3	0	1	0
ENSMUSG00000085965	2310016D23Rik	overlapping_locus	chr1	60778843	60803790	+	1	6	4	1	12	4	6	6	0	1	1	2	3	3	0	4	3	1	0
ENSMUSG00000104069	Gm37198	overlapping_locus	chr1	60779352	60781461	+	0	0	4	0	0	0	0	3	3	0	2	0	0	3	0	0	0	2	2
ENSMUSG00000083118	Gm11609	overlapping_locus	chr1	60792490	60793832	+	0	0	0	0	0	0	0	0	0	3	3	0	0	0	1	0	0	0	0
ENSMUSG00000083355	Gm11581	pseudo_consens	chr1	60809116	60809942	+	119	108	118	130	81	73	58	30	69	46	38	39	40	62	102	109	45	43	80
ENSMUSG00000102549	Gm38137		chr1	60880338	60881738	+	15	20	10	22	2	15	2	0	4	10	8	4	6	6	27	17	0	6	19
ENSMUSG00000026011	Ctla4	overlapping_locus	chr1	60887000	60915832	+	33	55	40	30	28	31	60	19	51	44	48	41	19	42	29	57	10	32	29
ENSMUSG00000081382	Rpl18-ps1	overlapping_locus	chr1	60900898	60901422	+	13	12	31	13	21	24	14	18	12	11	20	18	23	13	23	12	28	15	30
ENSMUSG00000026009	Icos	overlapping_locus	chr1	60977927	61000320	+	37	62	57	55	29	26	126	69	54	103	180	93	61	51	73	76	42	61	61
ENSMUSG00000102561	Gm37039	overlapping_locus	chr1	60989479	60991963	+	0	0	2	0	0	0	6	0	0	0	1	1	0	0	0	0	0	0	0
ENSMUSG00000082804	Rpl17-ps1	pseudo_consens	chr1	61075674	61076225	+	0	0	0	0	0	0	0	0	1	2	1	0	0	1	2	0	0	0	0
ENSMUSG00000052062	Pard3b	overlapping_locus	chr1	61638824	62642284	+	819	699	848	925	510	484	433	421	551	429	327	339	369	503	477	578	391	398	510
ENSMUSG00000103656	Gm37205	overlapping_locus	chr1	61654423	61657158	+	0	2	0	0	6	0	0	0	0	0	0	0	0	0	4	0	0	0	1
ENSMUSG00000104402	Gm38012	overlapping_locus	chr1	61677249	61680277	+	2	11	5	5	21	8	10	14	4	1	6	7	9	14	12	11	4	4	8
ENSMUSG00000104081	Gm38278		chr1	61702527	61703891	+	0	0	2	0	0	0	0	0	0	1	1	1	0	0	0	0	0	0	0
ENSMUSG00000103002	Gm38075	overlapping_locus	chr1	61805221	61806140	+	0	2	4	0	0	0	0	0	0	1	0	1	0	0	3	0	0	0	1
ENSMUSG00000100344	Gm29640		chr1	61980930	61981207	-	0	0	0	0	1	1	0	0	0	2	1	1	0	0	0	0	0	0	0
ENSMUSG00000085019	Pard3bos2		chr1	62131195	62136109	-	4	11	1	3	0	2	0	0	0	0	0	0	0	1	0	1	1	0	0
ENSMUSG00000102359	Gm38351	overlapping_locus	chr1	62247153	62249670	+	0	0	1	1	1	0	0	0	2	0	0	0	0	0	0	0	0	0	2
ENSMUSG00000085400	Pard3bos3		chr1	62456725	62499261	-	5	4	3	2	7	1	4	0	4	0	5	0	2	3	0	7	3	2	1
ENSMUSG00000100750	Gm29084		chr1	62534491	62535942	-	0	0	0	0	0	1	2	2	1	0	3	4	1	4	0	3	0	1	2
ENSMUSG00000084333	Gm11599	pseudo_consens	chr1	62660839	62661716	+	0	4	4	1	6	3	3	2	0	5	1	2	2	2	2	5	2	2	4
ENSMUSG00000025969	Nrp2	overlapping_locus	chr1	62703285	62818695	+	2372	1815	2529	3175	1145	1558	2916	2346	2824	2707	1953	1835	1849	1864	2573	2282	1672	1682	2064
ENSMUSG00000100811	Gm29083		chr1	62714723	62718073	-	7	2	1	3	11	0	5	6	4	2	4	6	5	7	3	2	1	0	3
ENSMUSG00000103032	Gm37121	overlapping_locus	chr1	62809302	62811857	+	38	42	65	74	28	41	78	72	96	103	35	61	46	58	207	92	17	72	68
ENSMUSG00000100426	Gm4208		chr1	62821355	62832370	-	51	71	58	92	63	54	100	70	67	67	59	75	71	116	187	116	98	117	110
ENSMUSG00000040865	Ino80d		chr1	62958418	63114667	-	2486	2104	2751	2944	1049	1524	2124	2006	2312	2080	1526	1515	1355	2044	2496	2227	833	1405	2112
ENSMUSG00000081429	Rps27-ps1	pseudo_consens	chr1	63073774	63074019	+	0	1	4	0	0	1	11	1	2	0	1	2	0	1	1	0	0	0	0
ENSMUSG00000084799	Ino80dos	overlapping_locus	chr1	63113078	63158290	+	151	164	171	249	85	150	116	79	106	123	88	89	83	134	167	154	46	114	176
ENSMUSG00000101599	Gm20342	overlapping_locus	chr1	63117118	63126837	+	475	393	512	671	474	296	362	287	313	333	218	225	276	451	521	492	225	224	536
ENSMUSG00000025968	Ndufs1		chr1	63143596	63176833	-	3502	3371	3223	3068	2303	2026	2961	2871	3071	2881	2495	2192	2121	2207	2688	2829	1538	1961	1882
ENSMUSG00000077884	Gm24557		chr1	63161855	63161943	+	0	0	0	0	1	0	1	0	0	0	2	0	0	0	1	0	1	2	0
ENSMUSG00000025967	Eef1b2	ncRNA_host	chr1	63176825	63180486	+	15081	16994	14282	18906	10424	10340	17874	15626	15790	17379	16637	13720	13396	12018	16294	14564	13063	11294	17322
ENSMUSG00000064612	Gm26457		chr1	63178677	63178754	+	4	3	6	2	5	1	2	0	18	5	0	1	4	0	5	1	0	3	2
ENSMUSG00000064602	Snora41		chr1	63179004	63179135	+	43	24	17	31	15	12	19	21	32	16	23	13	16	14	14	24	12	8	16
ENSMUSG00000046856	Gpr1		chr1	63182691	63214543	-	33	44	81	33	14	23	34	23	21	33	20	16	22	51	29	35	29	33	61
ENSMUSG00000087561	Gm11608		chr1	63266848	63273120	-	0	0	0	0	0	0	0	0	0	0	1	0	0	0	0	1	0	0	0
ENSMUSG00000027520	Zdbf2		chr1	63273265	63314576	+	62	73	91	72	62	39	48	43	18	41	23	16	18	43	43	62	24	43	47
ENSMUSG00000081643	Gm11605	pseudo_consens	chr1	63364720	63365365	-	3	2	1	11	0	0	1	1	1	3	2	1	1	0	2	0	2	3	0
ENSMUSG00000025964	Adam23		chr1	63445891	63596276	+	939	610	773	1092	243	404	405	369	735	465	408	237	373	476	506	860	284	308	519
ENSMUSG00000087823	Gm22281		chr1	63575488	63575590	-	2	6	0	5	1	2	0	0	3	4	2	0	1	9	15	12	1	2	2
ENSMUSG00000025963	Mdh1b		chr1	63698819	63730318	-	0	0	1	0	0	1	2	0	0	0	0	0	1	0	0	0	0	0	0
ENSMUSG00000025962	Fastkd2		chr1	63730614	63754655	+	488	452	495	466	280	314	458	427	456	414	388	320	309	344	512	449	203	290	407
ENSMUSG00000025961	4933402D24Rik		chr1	63754907	63769267	-	0	4	5	6	2	3	1	2	7	11	0	1	3	4	1	1	0	2	3
ENSMUSG00000044689	Gm13749		chr1	63964727	63968999	+	4	13	15	8	1	4	4	4	2	0	2	7	6	5	16	2	5	14	7
ENSMUSG00000025959	Klf7	ncRNA_host	chr1	64029447	64122282	-	1507	1044	1498	1754	954	809	1274	1336	1212	1259	1028	884	877	878	1132	1067	771	900	1056
ENSMUSG00000086836	Gm13748		chr1	64078654	64090782	+	5	0	0	0	0	0	3	3	1	0	0	0	1	0	0	0	0	0	0
ENSMUSG00000086721	Gm13750	pseudo_consens	chr1	64150201	64150665	+	1	0	3	0	1	0	1	1	1	0	0	1	0	0	0	0	0	0	1
ENSMUSG00000101895	Gm28981		chr1	64185991	64303043	-	0	0	9	1	0	0	1	0	0	3	0	4	0	0	0	0	0	0	0
ENSMUSG00000025958	Creb1		chr1	64532645	64604548	+	1933	1801	2111	2273	1086	1319	1913	1910	1701	1864	1459	1376	1280	1680	1957	1703	626	1300	1589
ENSMUSG00000025956	Mettl21a		chr1	64606473	64617242	-	497	533	508	558	297	332	442	358	342	369	318	298	260	455	434	453	274	322	450
ENSMUSG00000101832	Gm28982		chr1	64617784	64626033	+	10	12	8	8	4	9	6	8	1	1	2	2	7	16	5	2	2	4	4
ENSMUSG00000100437	Gm29152		chr1	64649935	64652756	+	15	3	2	1	1	4	10	0	0	2	1	1	2	4	1	9	2	0	4
ENSMUSG00000087213	2810408I11Rik		chr1	64679871	64690659	-	11	7	15	8	10	8	22	29	13	34	27	15	20	19	10	26	8	3	3
ENSMUSG00000070871	Ccnyl1		chr1	64690455	64725644	+	486	458	459	472	211	327	521	474	513	426	443	377	325	323	419	348	224	339	304
ENSMUSG00000045005	Fzd5		chr1	64730558	64737751	-	540	601	614	593	251	408	820	666	916	837	611	662	520	378	541	523	292	347	355
ENSMUSG00000102140	Gm38058		chr1	64736240	64740607	+	7	3	6	7	3	1	8	8	10	3	3	3	2	2	8	6	1	0	4
ENSMUSG00000051344	Plekhm3		chr1	64785983	64956824	-	939	800	864	1034	346	558	1030	899	906	935	692	643	593	761	966	944	437	596	671
ENSMUSG00000097264	Rpl31-ps24	pseudo_consens	chr1	64934402	64934780	+	0	0	0	0	2	0	0	0	2	0	1	1	0	0	0	0	0	0	2
ENSMUSG00000084416	Rpl10a-ps1		chr1	64993951	64994604	-	157	213	201	257	141	129	268	253	204	258	236	170	194	183	202	177	289	174	230
ENSMUSG00000025955	Akr1cl		chr1	65012689	65032759	-	41	10	4	24	1	0	2	0	2	6	2	16	0	1	0	2	1	14	4
ENSMUSG00000067299	Crygd		chr1	65061872	65063452	-	3	0	0	0	0	1	0	0	0	0	0	0	0	0	4	0	1	0	0
ENSMUSG00000100774	Gm7329	pseudo_consens	chr1	65095227	65095436	+	0	0	0	1	0	0	0	0	2	0	0	1	1	0	1	0	0	0	0
ENSMUSG00000044816	D630023F18Rik	overlapping_locus	chr1	65105285	65123214	-	3	5	4	5	0	4	12	10	4	8	6	5	7	8	0	0	2	3	4
ENSMUSG00000025950	Idh1		chr1	65158616	65186500	-	3819	3630	3715	4484	1588	2237	3240	2605	3256	2821	2347	2313	2351	2544	2839	2897	2070	2330	2769
ENSMUSG00000025949	Pikfyve		chr1	65186683	65278695	+	1719	1376	1716	1801	771	1027	1442	1259	1266	1334	887	933	901	1464	1535	1413	457	877	1316
ENSMUSG00000025946	Pth2r		chr1	65282056	65389244	+	29	0	14	32	6	7	11	7	3	5	3	8	3	4	14	7	4	5	8
ENSMUSG00000082774	Gm8805	pseudo_consens	chr1	65552682	65552994	+	0	0	0	0	0	0	0	0	1	0	2	0	0	0	0	0	1	0	0
ENSMUSG00000015222	Map2	ncRNA_host	chr1	66175273	66442583	+	5178	4988	5544	5659	1278	3296	5137	5599	5146	4470	3417	4439	3975	4178	5066	4612	904	2691	3837
ENSMUSG00000073656	Gm10558		chr1	66322276	66328796	-	14	21	5	16	94	8	3	24	2	15	20	10	20	7	20	14	37	11	14
ENSMUSG00000065694	Gm25411		chr1	66436082	66436232	+	9	4	1	2	2	5	1	4	1	2	3	1	1	1	6	2	0	1	2
ENSMUSG00000055567	Unc80		chr1	66468367	66699148	+	38	52	54	42	10	30	4	20	34	23	15	9	14	36	37	38	17	17	34
ENSMUSG00000103375	Gm37181		chr1	66690630	66692356	-	0	0	1	1	1	1	0	0	0	0	0	0	1	0	0	1	0	1	0
ENSMUSG00000026005	Rpe		chr1	66700831	66719805	+	911	942	858	973	443	624	984	876	858	1076	748	687	699	772	991	798	249	525	873
ENSMUSG00000026004	Kansl1l	overlapping_locus	chr1	66719248	66817562	-	1021	855	1139	1032	456	644	862	666	706	673	576	585	538	895	823	882	284	606	894
ENSMUSG00000102559	Gm37570	overlapping_locus	chr1	66765626	66768731	-	21	34	41	50	23	23	35	32	26	18	22	24	22	45	45	41	14	16	36
ENSMUSG00000102374	Gm38387	overlapping_locus	chr1	66769290	66771866	-	18	19	30	22	4	15	23	15	20	26	16	13	10	17	25	9	7	12	19
ENSMUSG00000102776	Gm38162		chr1	66775511	66780107	+	27	20	36	45	20	17	33	48	47	19	35	26	23	37	33	17	6	23	42
ENSMUSG00000082057	Gm15789	pseudo_consens	chr1	66783913	66786445	+	11	6	6	10	8	4	1	0	7	21	5	4	5	1	10	1	4	5	3
ENSMUSG00000103706	6820402A03Rik	overlapping_locus	chr1	66793645	66796298	-	12	17	13	21	11	12	13	21	10	8	7	12	6	6	21	8	4	6	8
ENSMUSG00000103756	Gm37285	overlapping_locus	chr1	66799659	66800797	-	19	22	45	34	33	25	43	21	13	21	35	23	14	28	21	20	19	25	17
ENSMUSG00000103382	Gm37755		chr1	66812315	66814493	+	17	12	16	8	5	3	11	6	24	7	7	10	12	25	22	34	5	3	20
ENSMUSG00000103553	Gm38218		chr1	66821226	66825914	-	19	6	2	13	5	7	5	6	4	1	7	7	5	1	5	8	5	5	10
ENSMUSG00000026003	Acadl	overlapping_locus	chr1	66830839	66863277	-	3233	2854	3157	3155	1983	1871	3468	2891	3118	2647	2992	2125	2506	2336	2654	2934	2718	2491	2234
ENSMUSG00000082769	Gm15793	overlapping_locus	chr1	66849108	66849602	-	7	8	9	12	13	5	8	8	3	9	8	7	6	0	7	6	14	4	11
ENSMUSG00000061816	Myl1		chr1	66924295	66945404	-	8318	6310	7683	4559	11413	4498	3136	3353	3760	3795	2536	1793	4669	3598	3901	6029	5488	4289	3920
ENSMUSG00000094191	Rpl31-ps14		chr1	66948563	66948940	-	4	0	1	1	4	2	1	1	0	3	0	0	3	2	2	2	5	0	3
ENSMUSG00000026000	Lancl1		chr1	67000517	67038872	-	3367	3952	3430	4120	1817	2723	3776	3157	3986	3308	3017	2925	2866	3325	3554	3745	2316	2623	3087
ENSMUSG00000025991	Cps1		chr1	67123026	67231259	+	1	5	1	7	2	2	96	71	117	119	88	79	42	10	18	7	3	5	3
ENSMUSG00000062209	Erbb4	overlapping_locus	chr1	68032186	69108059	-	39	35	57	32	32	28	12	17	42	29	6	7	20	33	28	49	17	19	18
ENSMUSG00000087514	Gm16076	overlapping_locus	chr1	69091913	69106740	-	4	0	0	1	0	1	0	0	4	0	0	0	0	0	0	4	1	0	2
ENSMUSG00000101387	Pced1c-ps	pseudo_consens	chr1	69377321	69378071	+	0	5	1	0	1	0	0	1	0	0	1	0	1	0	0	4	0	1	0
ENSMUSG00000099804	Gm28497		chr1	69441056	69444084	+	10	10	12	6	6	4	7	2	0	17	3	5	4	20	11	5	5	2	10
ENSMUSG00000100354	Gm29113		chr1	69490357	69493788	-	4	0	4	1	0	1	5	0	0	0	0	0	1	0	3	0	2	4	2
ENSMUSG00000101156	Gm29114		chr1	69513932	69547707	+	1	2	5	3	1	2	0	5	1	1	1	1	2	5	1	1	0	0	1
ENSMUSG00000025997	Ikzf2	overlapping_locus	chr1	69531214	69687245	-	1316	1389	1557	1696	877	877	1159	834	1009	917	621	646	671	1062	1380	1252	411	696	1172
ENSMUSG00000100815	Gm29112	overlapping_locus	chr1	69595036	69598522	-	0	0	4	0	2	2	2	0	0	4	0	0	0	0	7	6	0	1	0
ENSMUSG00000099954	Gm28112	overlapping_locus	chr1	69660187	69662061	-	4	2	1	0	0	1	2	5	5	1	2	3	4	2	7	1	1	2	7
ENSMUSG00000103402	Gm37930		chr1	69770868	69772753	+	0	0	0	1	0	2	0	3	0	0	0	0	0	0	0	0	0	1	0
ENSMUSG00000053153	Spag16	ncRNA_host	chr1	69826970	70725132	+	0	1	0	0	1	0	0	0	0	0	0	0	0	0	0	0	0	1	0
ENSMUSG00000101730	Gm28580		chr1	70067968	70068055	-	0	0	0	0	0	0	0	0	1	0	0	0	1	0	0	0	4	0	0
ENSMUSG00000026196	Bard1	overlapping_locus	chr1	71027498	71103146	-	195	182	160	254	139	149	348	248	248	297	254	197	159	164	132	132	115	133	94
ENSMUSG00000089965	Gm16236	overlapping_locus	chr1	71039652	71040030	-	1	0	0	3	0	1	2	4	0	2	4	4	1	3	0	1	0	1	0
ENSMUSG00000101551	Gm8870	pseudo_consens	chr1	71155246	71156020	-	0	1	0	0	0	0	0	1	1	1	1	0	2	0	0	1	0	0	1
ENSMUSG00000050296	Abca12		chr1	71242276	71414910	-	9489	9772	10197	9656	2231	6103	11277	14244	11758	8875	8310	10110	8506	7589	9653	9227	2222	5745	5753
ENSMUSG00000026192	Atic		chr1	71557150	71579631	+	1941	1846	1769	2044	1319	1325	2078	1903	2013	2024	1855	1417	1316	1466	1722	1543	1344	1265	1244
ENSMUSG00000026193	Fn1		chr1	71585520	71653200	-	22153	15264	22685	22875	6175	11125	14810	13564	16707	15354	10629	8700	11940	13045	14547	15235	7630	9623	10007
ENSMUSG00000073652	Apol7d		chr1	71652837	71662843	+	1	0	9	8	3	6	0	1	2	6	5	1	5	0	5	0	2	1	1
ENSMUSG00000101834	Gm5829		chr1	71709705	71710055	-	0	2	1	1	0	2	0	0	0	1	0	2	0	0	1	0	1	0	2
ENSMUSG00000100319	Gm5256	pseudo_consens	chr1	71714048	71714924	-	4	1	0	1	0	0	0	1	1	2	0	0	0	1	0	0	1	1	0
ENSMUSG00000101211	Gm28818		chr1	71894068	71917125	-	2	0	0	4	0	3	4	0	0	0	0	0	2	1	2	0	0	1	1
ENSMUSG00000101848	4933417E11Rik	overlapping_locus	chr1	71958998	72005195	-	0	0	0	5	2	1	1	0	8	0	1	1	2	2	0	2	0	0	0
ENSMUSG00000059483	Gm5528	overlapping_locus	chr1	72004288	72004767	+	0	1	1	3	0	1	0	0	0	0	1	0	0	1	2	0	0	1	0
ENSMUSG00000101496	Gm8885	pseudo_consens	chr1	72087857	72088454	+	0	0	0	0	0	1	0	1	2	0	3	2	3	0	0	1	3	2	1
ENSMUSG00000102123	Gm4319		chr1	72107155	72122001	-	6	5	6	3	2	6	13	12	12	6	3	6	3	7	10	8	2	12	6
ENSMUSG00000039395	Mreg		chr1	72159442	72212307	-	3296	3239	3083	3272	1414	2375	3286	3205	3317	2957	2423	2973	2330	2528	3526	3096	1283	2050	2288
ENSMUSG00000094655	Gm25360		chr1	72226240	72226430	+	0	0	0	0	0	1	0	0	1	4	3	0	1	0	0	0	0	2	0
ENSMUSG00000094050	Gm23472		chr1	72236946	72237136	+	0	2	0	0	2	1	0	0	0	3	0	0	1	0	2	0	0	2	0
ENSMUSG00000093956	Gm24497		chr1	72244213	72244403	+	2	1	3	12	0	3	5	0	1	1	0	2	2	2	5	8	0	2	2
ENSMUSG00000093843	Gm25939		chr1	72255008	72255198	+	3	9	8	2	2	2	6	2	2	0	0	0	0	4	0	0	2	2	7
ENSMUSG00000026189	Pecr		chr1	72259167	72284314	-	513	499	516	613	391	378	330	380	350	365	281	223	265	414	496	447	332	285	405
ENSMUSG00000026188	Tmem169		chr1	72284369	72303104	+	6	7	15	9	8	3	11	0	8	0	6	2	1	9	18	3	2	4	10
ENSMUSG00000026187	Xrcc5		chr1	72307427	72394952	+	958	1069	915	914	508	686	1069	1130	1044	976	886	813	624	638	945	790	476	675	478
ENSMUSG00000039372	Marchf4		chr1	72427112	72536930	-	0	0	0	2	1	1	0	1	3	0	1	2	0	3	0	0	0	0	0
ENSMUSG00000085812	Gm15843	pseudo_consens	chr1	72459499	72460027	+	2	0	8	11	3	5	1	2	4	4	8	2	5	1	0	6	1	2	9
ENSMUSG00000039354	Smarcal1		chr1	72583251	72633134	+	824	820	892	859	449	491	670	612	638	599	443	438	540	592	652	666	406	463	644
ENSMUSG00000039342	Ankar		chr1	72642980	72700579	-	0	0	0	2	0	2	0	0	0	1	0	2	0	0	0	0	0	5	0
ENSMUSG00000046330	Rpl37a		chr1	72711290	72713813	+	7569	9608	6454	9730	6429	5578	8621	7265	7348	7834	8717	6426	6356	5959	7557	7629	9111	5971	8294
ENSMUSG00000039323	Igfbp2		chr1	72824503	72852474	+	3333	3146	2717	4941	1390	1810	5990	5908	6292	6009	4465	4342	3892	2866	3190	2720	2501	2033	2143
ENSMUSG00000026185	Igfbp5		chr1	72857932	72874884	-	26001	23653	34481	35006	12885	20540	11753	10704	13724	12676	7531	8424	7990	16359	18625	20452	10064	14706	15151
ENSMUSG00000099877	Pinc		chr1	73390775	73407569	-	3	0	0	0	0	0	0	0	2	0	0	0	0	0	0	0	0	1	0
ENSMUSG00000100044	Gm9553	pseudo_consens	chr1	73512046	73513041	+	0	0	1	0	0	0	0	0	0	0	1	0	0	0	0	0	0	0	0
ENSMUSG00000100444	C530043A13Rik		chr1	73522095	73529790	-	0	3	5	5	1	1	8	10	2	4	5	1	0	2	6	2	1	1	1
ENSMUSG00000100429	Gm29186		chr1	73528937	73536349	+	0	0	0	0	0	0	0	4	0	0	0	0	0	0	0	2	0	0	2
ENSMUSG00000100301	6030407O03Rik	overlapping_locus	chr1	73618088	73864466	-	23	23	51	25	41	25	7	3	6	4	8	3	6	15	5	22	10	20	14
ENSMUSG00000101344	Gm29183	overlapping_locus	chr1	73750321	73841917	-	16	30	5	21	15	7	22	3	6	7	6	5	5	9	11	9	12	9	9
ENSMUSG00000098504	Mir6351		chr1	73855477	73855575	-	0	1	1	1	0	1	0	0	2	0	0	0	0	0	0	0	0	3	1
ENSMUSG00000055322	Tns1		chr1	73910231	74124449	-	18727	14731	17588	18375	9213	11084	9159	8592	10157	9464	6024	6254	7063	11377	14557	14348	9978	10665	12098
ENSMUSG00000061815	Rufy4		chr1	74125541	74148223	+	180	172	162	213	167	106	150	134	134	126	91	101	98	131	166	162	122	118	139
ENSMUSG00000026180	Cxcr2		chr1	74153989	74161246	+	99	129	114	120	48	82	665	871	613	510	502	550	553	295	377	231	69	207	113
ENSMUSG00000048480	Cxcr1		chr1	74191785	74194631	-	0	0	2	0	0	0	0	1	0	0	3	0	1	1	0	1	0	0	2
ENSMUSG00000006304	Arpc2		chr1	74236084	74268209	+	9645	10222	9784	10377	5801	6847	11306	12042	11040	10290	10350	8857	8770	7506	10242	9900	6991	7516	7357
ENSMUSG00000064272	Gpbar1		chr1	74278550	74279624	+	0	0	3	1	6	0	1	1	4	0	1	0	2	0	0	0	4	0	3
ENSMUSG00000006299	Aamp		chr1	74279840	74284738	-	5395	6192	4927	6630	3270	3695	5702	5234	5228	4877	4127	3863	3903	4045	5513	4951	3813	3638	3998
ENSMUSG00000026179	Pnkd	overlapping_locus	chr1	74284930	74353694	+	2525	2341	2226	2959	1029	1654	1230	1088	1170	1153	749	881	984	1743	1953	1864	1091	1054	1866
ENSMUSG00000103013	Gm37503		chr1	74287542	74287860	-	13	15	24	15	10	4	9	6	4	22	7	10	8	9	11	2	11	11	9
ENSMUSG00000006301	Tmbim1		chr1	74288247	74305622	-	8097	7254	7765	8341	4408	5138	5139	5027	4749	4524	3743	3578	4128	5746	6662	6157	4642	4441	6187
ENSMUSG00000103403	Gm37931	overlapping_locus	chr1	74307848	74310713	+	21	18	17	23	11	17	17	9	5	23	7	13	11	8	10	24	12	17	16
ENSMUSG00000073650	Catip		chr1	74362108	74369321	+	53	94	86	83	47	48	33	42	33	42	35	27	28	46	38	67	28	35	42
ENSMUSG00000026177	Slc11a1		chr1	74375195	74386062	+	570	349	400	584	100	175	428	500	642	430	249	237	410	288	523	727	120	282	470
ENSMUSG00000026176	Ctdsp1	ncRNA_host	chr1	74391509	74397285	+	4983	4685	4726	5674	2160	3093	3607	2888	3510	3281	2686	2209	2599	3427	3922	4321	3104	2719	3456
ENSMUSG00000065468	Mir26b		chr1	74394310	74394394	+	5	7	0	0	2	3	2	0	0	0	0	2	1	1	1	4	2	2	1
ENSMUSG00000026175	Vil1		chr1	74409376	74435559	+	8	16	10	12	8	4	5	6	2	9	3	1	3	11	12	11	6	7	8
ENSMUSG00000033364	Usp37	overlapping_locus	chr1	74435511	74544284	-	789	626	794	737	433	498	826	875	745	766	542	558	565	759	863	636	305	472	541
ENSMUSG00000103227	Gm37733	overlapping_locus	chr1	74500340	74503301	-	0	0	0	0	1	0	0	1	0	1	2	0	2	4	1	0	1	0	0
ENSMUSG00000026174	Cnot9		chr1	74506058	74530842	+	1606	1601	1534	1829	877	1140	1799	1882	1719	1599	1631	1349	1208	1342	1552	1528	1084	1137	1050
ENSMUSG00000026173	Plcd4		chr1	74542888	74567794	+	120	60	65	48	106	60	22	36	34	41	13	16	28	40	65	46	23	43	35
ENSMUSG00000026135	Zfp142	ncRNA_host	chr1	74565127	74588246	-	737	516	820	844	294	513	799	666	639	680	383	527	415	617	857	653	304	492	649
ENSMUSG00000093155	Gm25035		chr1	74586896	74586972	-	0	0	0	1	0	3	0	0	0	1	0	0	0	0	0	0	0	0	0
ENSMUSG00000026172	Bcs1l		chr1	74588289	74592443	+	376	333	381	452	273	258	298	300	241	334	264	207	254	325	304	345	260	241	319
ENSMUSG00000026171	Rnf25		chr1	74593748	74601397	-	1106	1143	1017	1220	616	762	981	998	1000	987	848	871	733	763	1070	955	655	714	916
ENSMUSG00000033276	Stk36		chr1	74601445	74636894	+	96	41	73	119	55	74	97	67	68	59	60	55	44	30	96	62	29	48	63
ENSMUSG00000033257	Ttll4		chr1	74661745	74703730	+	2025	1675	1953	2120	842	1361	1547	1664	1449	1494	1274	1293	1047	1398	1947	1590	621	1108	1566
ENSMUSG00000026170	Cyp27a1		chr1	74713574	74737892	+	1081	918	1143	1296	455	619	827	543	682	587	492	500	580	802	1035	949	501	708	1048
ENSMUSG00000006542	Prkag3		chr1	74738922	74749221	-	102	109	93	89	125	87	85	48	106	73	71	70	94	47	100	91	60	97	54
ENSMUSG00000033227	Wnt6		chr1	74771892	74785322	+	278	241	213	323	111	163	262	257	194	242	161	178	160	223	226	182	190	156	163
ENSMUSG00000099472	Gm29539		chr1	74774943	74777405	-	3	8	13	8	7	5	7	6	9	8	8	3	4	7	17	1	3	14	8
ENSMUSG00000026167	Wnt10a		chr1	74791516	74804179	+	1025	1025	902	1045	542	633	1391	1310	1066	1207	1085	781	864	763	922	744	787	785	511
ENSMUSG00000090071	Cdk5r2	overlapping_locus	chr1	74854934	74857732	+	0	0	0	0	1	0	1	0	0	0	0	0	0	0	1	0	0	2	1
ENSMUSG00000006546	Cryba2		chr1	74889934	74893143	-	0	0	0	0	0	0	0	1	0	0	0	0	0	1	0	0	0	2	0
ENSMUSG00000047021	Cfap65		chr1	74902071	74935599	-	0	3	0	5	0	0	0	0	0	0	0	0	1	0	0	0	0	0	1
ENSMUSG00000006538	Ihh		chr1	74945315	74951672	-	15	12	4	6	2	3	2	1	16	6	11	7	5	19	13	10	10	7	3
ENSMUSG00000103145	Gm37744		chr1	74954252	74955841	+	6	4	3	1	3	2	1	0	2	3	6	2	0	2	6	0	1	3	3
ENSMUSG00000026162	Nhej1	fragmented_locus	chr1	74967139	75125200	-	89	127	74	127	55	62	110	85	90	97	90	79	91	70	99	78	73	60	93
ENSMUSG00000026205	Slc23a3		chr1	75125541	75133890	-	184	206	175	165	76	163	103	107	139	102	109	90	72	117	184	123	82	140	106
ENSMUSG00000033159	Cnppd1		chr1	75134554	75142711	-	3280	3271	3126	3729	1816	2203	3716	3064	3387	2892	2558	2624	2449	2568	3533	2991	2530	2279	2627
ENSMUSG00000049339	Retreg2		chr1	75142778	75147913	+	3787	4100	3477	4463	1772	2771	3234	2961	3149	2727	2455	2278	2446	2974	3453	3426	2834	2508	2822
ENSMUSG00000026197	Zfand2b		chr1	75168646	75171629	+	1316	1592	1226	1435	777	904	1361	1122	1216	1185	1020	985	830	908	1347	1178	977	874	1096
ENSMUSG00000026198	Abcb6	overlapping_locus	chr1	75171717	75180392	-	89	112	91	154	90	91	118	195	150	81	104	105	110	80	124	156	95	101	82
ENSMUSG00000033124	Atg9a	overlapping_locus	chr1	75180860	75192196	-	1423	1385	1433	1618	575	1061	1298	1298	1379	1179	963	1038	938	1008	1494	1346	668	998	916
ENSMUSG00000026199	Ankzf1		chr1	75192151	75199387	+	1602	1478	1473	1803	834	951	1430	1289	1242	1193	860	898	949	1269	1605	1270	635	820	1306
ENSMUSG00000026200	Glb1l	ncRNA_host	chr1	75198236	75210813	-	478	469	572	619	296	294	425	336	282	389	269	248	233	354	503	474	176	262	360
ENSMUSG00000026201	Stk16		chr1	75210838	75215606	+	1189	986	1103	1401	717	737	1470	1230	1014	1126	1055	911	858	925	1005	937	591	820	1104
ENSMUSG00000026202	Tuba4a		chr1	75214228	75219865	-	10003	12526	8962	9423	5495	7669	12573	15446	12641	11287	11512	10734	9868	7270	10836	8880	5896	7102	5867
ENSMUSG00000096094	A630095N17Rik		chr1	75220095	75232102	-	27	62	31	31	15	23	22	34	18	17	19	21	20	27	22	22	14	17	23
ENSMUSG00000118482	Gm50472		chr1	75229552	75229779	+	1	1	4	0	0	0	0	0	0	0	2	1	1	0	0	0	0	1	1
ENSMUSG00000026203	Dnajb2		chr1	75236406	75245692	+	3181	3183	2982	3512	1901	2073	2921	3171	2811	2488	1957	2105	2216	2641	3151	2717	1666	1873	2397
ENSMUSG00000026204	Ptprn		chr1	75247027	75264502	-	46	16	13	34	25	19	33	16	14	23	17	16	15	19	31	18	19	18	23
ENSMUSG00000033061	Resp18		chr1	75272199	75278415	-	1	0	0	0	1	0	0	0	0	0	0	0	0	0	0	0	0	1	1
ENSMUSG00000026209	Dnpep		chr1	75307896	75317990	-	2366	2555	2191	2635	1370	1718	1885	1785	1563	1653	1301	1356	1395	1836	1909	1947	1445	1403	1860
ENSMUSG00000026208	Des		chr1	75360329	75368579	+	10127	7868	7581	4955	11107	4512	3613	4472	4911	4668	3229	2733	5054	4315	4763	7433	8796	5715	3861
ENSMUSG00000085653	Gm15179		chr1	75368212	75375012	-	29	9	5	11	23	9	3	12	3	4	7	3	9	10	1	10	8	4	11
ENSMUSG00000026207	Speg		chr1	75375297	75432320	+	1393	1041	1145	962	1188	714	598	544	634	552	321	313	586	583	730	1041	501	579	559
ENSMUSG00000033021	Gmppa		chr1	75435930	75443179	+	1599	1810	1465	2033	1022	1171	1532	1472	1413	1478	1016	981	947	1208	1593	1513	777	895	1266
ENSMUSG00000033007	Asic4		chr1	75450436	75474343	+	0	7	0	5	2	4	1	1	1	4	1	1	3	3	4	0	1	3	4
ENSMUSG00000102605	Gm37264		chr1	75468570	75470761	-	0	0	0	0	0	1	0	0	0	2	0	2	0	0	0	0	0	0	0
ENSMUSG00000032997	Chpf		chr1	75474569	75479307	-	1127	1097	977	1558	509	773	633	607	563	645	435	406	413	706	821	895	571	615	585
ENSMUSG00000026211	Obsl1		chr1	75479310	75506452	-	1519	1340	1312	1624	986	814	1003	839	950	1036	565	565	719	1064	1259	1114	618	660	896
ENSMUSG00000051703	Tmem198		chr1	75479532	75485705	+	41	42	49	100	50	47	59	54	44	46	26	27	24	45	39	60	30	29	62
ENSMUSG00000032968	Inha		chr1	75507077	75510366	+	286	353	299	445	255	242	338	264	346	330	228	239	195	260	377	287	147	193	279
ENSMUSG00000026213	Stk11ip		chr1	75521529	75537335	+	1557	1548	1354	1927	872	1019	1544	1319	1486	1267	1002	1020	923	1182	1588	1404	868	848	1213
ENSMUSG00000006576	Slc4a3		chr1	75546266	75562172	+	1126	964	857	1291	679	659	641	539	521	590	371	353	414	751	876	768	415	460	645
ENSMUSG00000082012	Gm5257	pseudo_consens	chr1	75636390	75637179	+	1	2	1	2	0	0	3	0	0	0	1	0	0	0	0	0	0	0	1
ENSMUSG00000100534	Gm816		chr1	76890472	77027792	-	0	0	0	0	1	0	0	1	1	0	2	3	3	0	0	0	0	0	1
ENSMUSG00000026235	Epha4	ncRNA_host	chr1	77367185	77515088	-	1331	1231	1416	1444	511	837	2328	2111	2076	1845	1415	1243	1315	1183	1247	1382	454	713	758
ENSMUSG00000101849	Gm28386		chr1	77515280	77517128	+	15	11	4	4	7	1	10	15	17	10	16	14	7	15	23	33	7	2	7
ENSMUSG00000004872	Pax3		chr1	78101267	78197134	-	92	58	96	92	45	33	39	32	42	46	19	22	38	67	60	46	25	40	54
ENSMUSG00000032908	Sgpp2	overlapping_locus	chr1	78310345	78420289	+	470	552	770	784	465	812	1224	1415	1464	1436	1088	993	963	1887	3031	1803	1308	1689	1760
ENSMUSG00000099561	Gm28410		chr1	78325628	78340106	-	0	4	0	1	2	0	0	1	5	0	1	1	0	3	0	3	0	3	1
ENSMUSG00000102945	Gm37884	overlapping_locus	chr1	78375614	78376431	+	0	0	4	0	0	0	0	0	0	0	1	0	0	0	0	0	0	1	0
ENSMUSG00000026245	Farsb	overlapping_locus	chr1	78417975	78488897	-	1000	1075	1005	1105	615	721	1197	1431	1065	1225	1330	983	966	747	845	904	718	717	755
ENSMUSG00000101798	Gm28995	overlapping_locus	chr1	78433352	78433612	+	2	0	10	13	2	4	0	0	0	0	0	2	0	0	5	7	0	0	2
ENSMUSG00000104018	4833412K13Rik	overlapping_locus	chr1	78465448	78466926	-	31	35	28	31	15	22	9	7	11	10	5	11	8	22	35	35	7	5	18
ENSMUSG00000090486	BC035947	overlapping_locus	chr1	78497026	78512158	-	125	71	97	118	113	75	35	44	37	43	22	27	34	71	82	63	74	50	69
ENSMUSG00000012187	Mogat1		chr1	78510991	78538173	+	154	126	94	131	114	58	30	48	34	36	44	21	41	119	69	90	112	52	89
ENSMUSG00000099364	5730419F03Rik		chr1	78595031	78609508	-	9	6	16	9	11	1	3	0	3	11	2	1	1	10	5	11	5	4	7
ENSMUSG00000032883	Acsl3	overlapping_locus	chr1	78657825	78707743	+	853	719	821	877	551	635	816	855	834	873	706	715	668	700	715	742	511	604	503
ENSMUSG00000079470	Utp14b	overlapping_locus	chr1	78658038	78671512	+	154	195	192	221	128	153	307	259	322	296	230	228	166	181	183	204	93	170	143
ENSMUSG00000099377	Gm6159	pseudo_consens	chr1	78783136	78784859	-	3	1	2	3	3	4	1	1	2	1	4	4	5	4	7	4	0	1	5
ENSMUSG00000047330	Kcne4		chr1	78816758	78820028	+	91	92	113	125	68	61	39	40	52	41	76	81	36	55	76	85	67	64	30
ENSMUSG00000101324	Gm29187		chr1	78821258	78822652	+	0	0	0	0	0	0	0	0	0	3	0	1	2	0	0	0	0	0	0
ENSMUSG00000072978	Gm5830	overlapping_locus	chr1	78967637	78968079	-	0	1	0	0	0	1	0	0	4	0	1	1	1	2	0	0	0	1	0
ENSMUSG00000050711	Scg2		chr1	79434669	79440120	-	0	2	0	0	0	1	0	0	0	0	1	0	0	0	1	0	0	2	0
ENSMUSG00000054702	Ap1s3	overlapping_locus	chr1	79606876	79671972	-	649	634	686	663	183	465	571	591	650	537	442	481	450	472	544	532	197	406	449
ENSMUSG00000102235	Gm37886	overlapping_locus	chr1	79619522	79621034	-	9	5	4	17	0	7	1	10	30	2	4	4	1	7	13	13	2	5	11
ENSMUSG00000073643	Wdfy1		chr1	79702262	79776143	-	796	737	776	852	589	546	693	591	564	528	513	511	461	588	765	582	393	486	656
ENSMUSG00000104497	Gm10555		chr1	79762717	79764507	+	0	0	0	0	1	0	0	0	0	0	1	1	0	0	0	1	0	0	1
ENSMUSG00000026248	Mrpl44		chr1	79776018	79781445	+	813	839	773	822	507	561	782	740	726	753	672	532	615	606	758	768	615	599	666
ENSMUSG00000026249	Serpine2		chr1	79794197	79861180	-	1466	1198	1249	1316	1360	1170	959	978	1133	1158	1172	837	891	888	929	1051	1522	1026	712
ENSMUSG00000067106	Gm5529	pseudo_consens	chr1	79922536	79923426	-	4	0	1	4	1	4	6	4	6	1	7	0	7	6	1	4	4	0	1
ENSMUSG00000100397	Gm28071	pseudo_consens	chr1	79957580	79958057	+	6	2	0	2	0	0	0	1	0	0	0	0	0	0	4	1	0	2	1
ENSMUSG00000102518	Gm38339		chr1	80146973	80148801	-	1	2	1	1	0	1	0	0	0	1	0	1	0	0	0	4	0	0	2
ENSMUSG00000099552	9830004L10Rik		chr1	80184719	80192073	+	4	2	1	1	0	4	0	1	0	0	2	1	0	1	6	0	0	6	1
ENSMUSG00000043230	Fam124b		chr1	80198706	80218473	-	174	178	224	183	33	161	69	89	65	49	34	53	67	179	208	113	20	67	132
ENSMUSG00000101257	2310015K22Rik		chr1	80225044	80228792	+	129	123	188	170	71	122	135	156	110	133	59	90	139	153	216	119	32	109	144
ENSMUSG00000103404	Gm37932		chr1	80255031	80256197	-	0	0	0	0	0	1	1	0	0	0	0	1	1	6	0	0	0	0	0
ENSMUSG00000004364	Cul3	overlapping_locus	chr1	80264923	80340480	-	7246	6760	8052	7133	2663	5061	6078	6173	6372	5216	4606	5713	4801	5306	6740	6361	1898	4576	4746
ENSMUSG00000103076	Gm37902	overlapping_locus	chr1	80274731	80276413	-	29	11	25	19	3	22	55	43	23	33	28	22	19	34	38	56	2	19	48
ENSMUSG00000103525	Gm37262		chr1	80326177	80327994	-	0	0	3	8	0	2	4	1	1	2	0	2	0	3	12	0	0	1	2
ENSMUSG00000101722	Gm29125		chr1	80382822	80386251	+	3	5	11	6	0	2	1	2	0	3	7	7	5	13	0	18	1	3	4
ENSMUSG00000101483	1700016L21Rik		chr1	80445932	80479867	+	1	0	0	1	0	0	0	0	0	0	0	0	0	0	0	0	0	1	0
ENSMUSG00000038608	Dock10	overlapping_locus	chr1	80501073	80758527	-	928	717	1093	1093	326	499	709	601	533	744	559	430	500	676	901	897	221	513	797
ENSMUSG00000103192	Gm37645	overlapping_locus	chr1	80666009	80669564	-	0	5	0	0	0	2	0	0	1	0	2	1	1	0	1	0	0	0	0
ENSMUSG00000104488	Gm38062	overlapping_locus	chr1	80728809	80730664	-	2	0	0	0	1	0	0	0	0	0	0	0	0	1	1	0	0	0	2
ENSMUSG00000102721	A630081D01Rik	overlapping_locus	chr1	80747222	80749054	-	3	3	4	1	4	0	3	11	1	3	3	2	4	10	1	4	6	7	2
ENSMUSG00000054976	Nyap2		chr1	81076950	81341764	+	0	0	0	0	0	0	0	0	0	0	0	0	0	1	1	3	0	1	2
ENSMUSG00000087008	Gm5530	pseudo_consens	chr1	81741985	81742969	-	0	0	1	0	0	1	0	0	0	0	3	2	1	0	0	0	1	0	2
ENSMUSG00000055980	Irs1		chr1	82233101	82291416	-	1220	774	1012	1210	361	648	414	446	346	441	254	307	244	671	685	663	296	546	568
ENSMUSG00000026142	Rhbdd1	overlapping_locus	chr1	82316452	82445366	+	1203	1057	1236	1185	509	748	1013	1066	1035	978	806	815	758	839	934	957	594	696	672
ENSMUSG00000104493	Gm19552	overlapping_locus	chr1	82352217	82355049	+	7	6	1	6	10	0	1	3	0	1	5	4	0	1	3	1	2	3	4
ENSMUSG00000100786	Gm28940	ncRNA_host	chr1	82392493	82402746	-	1	2	1	6	4	3	2	0	0	0	0	1	1	2	1	1	1	2	0
ENSMUSG00000067158	Col4a4		chr1	82448423	82586849	-	248	270	339	292	174	239	119	88	158	146	110	129	115	176	194	202	177	141	155
ENSMUSG00000079465	Col4a3	ncRNA_host	chr1	82586921	82722059	+	220	139	164	162	103	123	61	86	100	89	68	73	81	106	106	106	49	92	102
ENSMUSG00000097564	C430014B12Rik		chr1	82691928	82725169	-	24	9	10	10	3	11	3	11	4	13	6	9	7	8	9	9	3	9	8
ENSMUSG00000026150	Mff	overlapping_locus	chr1	82724890	82752394	+	2455	2251	2367	2783	1332	1670	2346	1860	2113	2225	1865	1814	1631	1696	2257	2181	1069	1541	1874
ENSMUSG00000101450	Gm28941	overlapping_locus	chr1	82739691	82740707	+	38	21	65	55	7	24	15	22	33	31	15	28	16	39	51	33	6	18	39
ENSMUSG00000026149	Tm4sf20		chr1	82756649	82768461	-	2	0	3	0	0	1	1	17	0	0	2	0	0	1	1	0	0	3	0
ENSMUSG00000114299	Gm47791		chr1	82770824	82771243	-	0	1	0	0	3	4	597	555	669	458	235	506	289	5	22	3	16	9	11
ENSMUSG00000100744	Gm17764	pseudo_consens	chr1	82822471	82822861	-	1	0	3	1	0	0	4	0	0	0	1	1	0	0	1	1	0	0	0
ENSMUSG00000026159	Agfg1		chr1	82839483	82901182	+	2962	2729	3126	3179	1243	2095	2902	2896	2994	2617	2316	2316	1902	2286	2881	2709	1017	1888	2199
ENSMUSG00000113880	A030005L19Rik		chr1	82913325	82914130	+	43	29	29	35	38	20	861	762	905	609	470	821	480	19	46	19	34	41	38
ENSMUSG00000113973	A030014E15Rik		chr1	82924917	82925712	+	1	0	4	4	27	9	617	664	616	417	450	712	387	5	11	0	11	9	14
ENSMUSG00000113846	Gm6217		chr1	82930571	82931399	-	0	0	1	0	0	0	45	24	40	33	43	44	25	0	0	2	0	0	1
ENSMUSG00000113084	A030003K21Rik		chr1	82942559	82943388	-	5	0	1	0	5	4	234	290	304	227	151	234	189	4	5	2	6	2	6
ENSMUSG00000113925	Gm7544		chr1	82955186	82956013	-	5	0	3	4	23	0	769	525	676	488	424	523	368	3	20	8	18	10	21
ENSMUSG00000114011	Gm47955		chr1	82960286	82960924	+	0	0	9	3	14	1	602	355	497	344	363	418	322	11	16	4	7	7	10
ENSMUSG00000113097	Gm47959		chr1	83000548	83001480	+	0	2	8	0	33	2	886	923	964	768	587	896	492	15	23	1	21	11	26
ENSMUSG00000101784	Gm7553	pseudo_consens	chr1	83003482	83004907	-	0	0	1	1	0	0	7	4	1	2	5	2	4	0	0	0	0	2	0
ENSMUSG00000038496	Slc19a3		chr1	83012523	83038448	-	52	58	38	36	17	42	42	31	26	24	34	30	34	52	56	49	44	53	38
ENSMUSG00000100432	Gm7539	pseudo_consens	chr1	83015393	83016022	+	0	2	1	7	0	4	4	8	4	1	2	2	1	3	1	6	0	4	2
ENSMUSG00000100190	Krtap28-10		chr1	83041524	83042480	-	0	0	2	6	40	4	1316	1208	1319	967	875	1503	779	7	24	13	21	18	27
ENSMUSG00000113267	Gm47969		chr1	83044932	83045946	+	0	0	1	3	58	5	1104	1110	1221	960	828	1224	694	11	29	8	59	15	26
ENSMUSG00000104423	A030005K14Rik		chr1	83058286	83059378	-	0	0	0	0	32	1	1231	1101	1105	848	700	1189	701	23	35	10	37	16	38
ENSMUSG00000101315	Krtap28-13		chr1	83060930	83061921	+	4	0	0	0	51	9	1433	1245	1427	1022	829	1434	748	5	49	16	40	19	29
ENSMUSG00000026166	Ccl20		chr1	83116766	83119167	+	21	19	20	18	26	23	154	158	82	125	128	114	56	39	93	31	34	51	33
ENSMUSG00000053161	Daw1		chr1	83159752	83210574	+	1	2	4	0	3	1	4	9	0	2	0	1	5	0	0	1	0	4	2
ENSMUSG00000026163	Sphkap	overlapping_locus	chr1	83254139	83408200	-	59	26	22	33	15	24	6	10	17	1	4	5	5	14	20	23	11	17	13
ENSMUSG00000079140	Gm6374	overlapping_locus	chr1	83314513	83315300	+	0	6	3	2	0	2	0	2	3	4	1	4	5	1	0	3	0	1	0
ENSMUSG00000045658	Pid1	overlapping_locus	chr1	84036296	84364180	-	953	838	1078	1126	425	616	536	588	657	733	585	434	550	641	828	842	495	682	1004
ENSMUSG00000102750	Gm37058	overlapping_locus	chr1	84132867	84134510	-	0	0	5	0	2	0	0	0	1	0	1	0	1	3	0	3	1	1	2
ENSMUSG00000036766	Dner	overlapping_locus	chr1	84369839	84696221	-	7	3	2	6	2	4	8	0	0	0	2	1	2	0	1	1	1	4	3
ENSMUSG00000026219	Trip12	overlapping_locus	chr1	84721189	84840516	-	9463	8410	10359	9986	3973	6809	9842	10398	10078	8976	7836	8721	7051	7626	9230	8896	3538	6482	6607
ENSMUSG00000103505	Gm38374	overlapping_locus	chr1	84807158	84809190	-	0	0	1	0	1	2	0	4	3	1	2	2	0	0	2	0	0	0	4
ENSMUSG00000104503	Gm37738	overlapping_locus	chr1	84819968	84824683	-	2	5	5	9	5	10	28	21	3	15	8	26	12	4	7	7	4	5	9
ENSMUSG00000073633	Fbxo36		chr1	84839841	84900487	+	129	122	135	126	104	72	86	86	116	98	109	105	85	93	81	124	133	95	87
ENSMUSG00000026220	Slc16a14		chr1	84905898	84935134	-	866	1013	908	1178	219	691	1390	1027	1510	1085	887	989	707	853	964	999	337	542	578
ENSMUSG00000118590	AC167036.1		chr1	84958982	84964572	+	2	7	0	0	0	0	0	6	0	5	3	2	0	3	0	1	0	1	1
ENSMUSG00000099693	Gm29284	overlapping_locus	chr1	84990638	84993032	-	0	0	2	0	0	0	1	1	2	3	9	1	0	0	0	0	0	1	0
ENSMUSG00000052477	C130026I21Rik	overlapping_locus	chr1	84992690	85270566	-	0	4	1	0	0	0	7	1	4	0	5	0	2	0	6	3	0	0	5
ENSMUSG00000064281	Rpl19-ps1	overlapping_locus	chr1	85012114	85012704	+	10	14	10	5	11	8	14	8	10	2	19	10	12	13	19	11	18	7	16
ENSMUSG00000089844	A530032D15Rik	overlapping_locus	chr1	85083069	85109853	-	4	5	16	9	3	1	6	22	5	8	2	5	3	4	7	21	8	7	12
ENSMUSG00000072109	A530040E14Rik		chr1	85105946	85114035	+	2	0	9	1	2	1	6	7	4	2	1	4	0	7	14	14	0	3	3
ENSMUSG00000089716	Gm6264	overlapping_locus	chr1	85159764	85194260	+	0	1	2	0	1	0	0	0	0	0	1	1	0	0	0	0	0	0	0
ENSMUSG00000079457	Gm7609	overlapping_locus	chr1	85199613	85213786	+	0	0	0	0	0	0	0	0	7	2	2	2	1	0	2	8	0	0	0
ENSMUSG00000090252	Gm16028		chr1	85246851	85255465	+	0	0	0	0	0	0	2	14	0	0	1	0	0	0	0	0	0	0	0
ENSMUSG00000079455	Gm16026		chr1	85266698	85285491	+	0	0	0	0	0	0	0	0	0	1	0	0	0	0	0	6	0	0	1
ENSMUSG00000118591	AC147806.1		chr1	85484252	85485142	-	0	3	0	0	0	0	0	0	0	0	0	3	0	0	0	0	0	0	0
ENSMUSG00000101751	Gm2427		chr1	85501090	85514604	+	0	0	0	0	2	3	5	5	0	7	0	0	2	5	5	0	2	0	0
ENSMUSG00000089714	Gm16092		chr1	85511133	85527161	-	3	3	1	0	0	0	0	1	0	0	0	0	0	0	0	0	0	0	4
ENSMUSG00000118607	AC147806.2		chr1	85526602	85552178	+	23	20	34	39	12	24	44	21	30	44	19	35	20	25	29	31	14	11	19
ENSMUSG00000118632	AC147806.3		chr1	85526690	85539198	+	12	4	14	13	1	1	4	3	3	2	4	1	8	7	1	10	2	5	10
ENSMUSG00000070034	Sp110		chr1	85576899	85598817	-	113	166	199	204	102	99	167	178	160	194	198	121	174	192	213	260	118	152	247
ENSMUSG00000090103	Gm16094		chr1	85599286	85599839	+	0	0	0	0	0	0	0	0	0	0	1	0	0	0	1	2	0	0	0
ENSMUSG00000070031	Sp140		chr1	85600378	85645037	+	120	110	114	138	38	67	142	90	79	95	90	69	94	112	108	194	64	85	141
ENSMUSG00000073628	Gm10552		chr1	85604085	85611896	-	0	0	0	0	0	0	0	0	0	0	0	1	1	5	0	0	0	0	0
ENSMUSG00000090246	Gm17017		chr1	85641222	85650585	-	6	3	12	13	2	9	14	1	9	3	3	6	3	2	7	4	1	13	9
ENSMUSG00000026222	Sp100	ncRNA_host	chr1	85649988	85709998	+	605	697	770	759	351	407	937	673	681	860	655	486	646	704	857	1176	358	512	1003
ENSMUSG00000052760	A630001G21Rik		chr1	85717083	85778643	-	140	171	153	171	67	100	308	200	198	197	126	119	161	155	211	232	55	121	238
ENSMUSG00000094834	Gm25472		chr1	85763794	85763871	+	0	0	0	0	0	0	0	2	0	0	0	0	1	0	0	0	0	1	0
ENSMUSG00000100217	9930111H07Rik		chr1	85775271	85784694	+	1	0	2	5	1	1	5	2	6	0	0	0	0	0	1	0	0	3	0
ENSMUSG00000036707	Cab39		chr1	85793441	85851576	+	6360	6815	6760	6923	2891	4886	6869	7209	7383	6310	6103	6109	5171	4878	6692	5971	2420	4756	4296
ENSMUSG00000026223	Itm2c		chr1	85894281	85908675	+	5194	4922	4800	6585	2951	3175	4096	3174	3792	3897	3263	2728	2728	3608	4426	4664	4328	3253	3797
ENSMUSG00000026224	4933407L21Rik		chr1	85928483	85940624	+	2	0	6	5	1	1	4	1	0	3	4	7	4	1	10	2	4	1	3
ENSMUSG00000099767	Gm28884		chr1	85933247	85937332	-	0	0	0	2	1	2	1	0	1	0	2	1	0	0	4	0	0	0	0
ENSMUSG00000049608	Gpr55		chr1	85938318	85961007	-	58	34	22	43	20	15	31	20	22	31	39	22	19	25	26	23	8	19	19
ENSMUSG00000100108	Gm28100		chr1	85972365	85986917	-	0	0	3	2	1	1	0	0	2	1	1	5	0	0	0	4	0	3	0
ENSMUSG00000099342	Gm18180		chr1	86014403	86015886	-	0	1	6	0	6	4	6	2	5	4	2	3	3	4	3	0	1	3	1
ENSMUSG00000026226	Spata3		chr1	86016816	86029958	+	0	2	3	1	1	2	0	0	0	1	0	0	0	4	1	0	0	2	3
ENSMUSG00000026227	2810459M11Rik		chr1	86045863	86055456	+	37	10	37	39	6	13	9	2	28	17	15	7	13	2	11	14	5	11	14
ENSMUSG00000026229	Psmd1	overlapping_locus	chr1	86064387	86139151	+	4734	4904	4508	4867	3049	3569	5395	5989	5798	4923	4668	4469	4128	3596	4672	4814	3249	3424	2782
ENSMUSG00000077274	Gm22786		chr1	86087301	86087422	+	0	2	0	0	0	0	2	5	0	0	1	0	0	0	0	2	0	0	0
ENSMUSG00000026228	Htr2b		chr1	86099026	86111970	-	18	11	18	11	10	8	11	10	23	25	16	6	4	6	12	8	1	9	18
ENSMUSG00000103272	Gm37914	overlapping_locus	chr1	86120883	86123561	+	11	4	8	17	0	5	3	14	11	9	2	11	7	7	11	3	1	3	9
ENSMUSG00000062590	Armc9	overlapping_locus	chr1	86154780	86278284	+	491	563	460	543	265	365	348	378	329	291	287	279	206	314	391	403	239	282	331
ENSMUSG00000087538	Gm16341		chr1	86275509	86301375	-	5	3	0	8	1	1	1	3	1	1	3	2	0	2	1	2	2	1	3
ENSMUSG00000079445	B3gnt7		chr1	86302832	86307305	+	36	41	39	53	27	34	26	31	35	27	28	28	16	19	40	33	33	31	10
ENSMUSG00000026234	Ncl	ncRNA_host	chr1	86344719	86359400	-	17636	17074	16504	18339	11579	11397	20920	23093	21738	21632	20675	16758	15204	12700	17738	16451	8328	11386	12559
ENSMUSG00000104627	Mir3535		chr1	86351981	86352127	-	0	0	3	3	0	2	3	5	0	1	1	0	1	0	1	2	0	0	1
ENSMUSG00000073627	C130036L24Rik		chr1	86359574	86373791	+	128	106	89	127	85	81	87	63	54	90	55	59	62	110	98	139	52	73	111
ENSMUSG00000110510	Gm45908		chr1	86377100	86378276	-	1	0	0	0	1	2	0	0	0	0	2	0	0	0	0	0	0	0	0
ENSMUSG00000026237	Nmur1		chr1	86386303	86426228	-	9	2	0	8	2	6	1	1	1	0	4	5	3	1	3	4	12	6	2
ENSMUSG00000101328	Rpl30-ps6	pseudo_consens	chr1	86473659	86474006	+	0	1	1	0	2	0	0	0	0	2	0	0	0	0	0	1	0	0	0
ENSMUSG00000026238	Ptma		chr1	86526726	86530712	+	20233	21595	17884	22384	14050	12338	22254	20319	19913	20233	18383	14966	14955	13772	18851	17197	10495	11534	13427
ENSMUSG00000026239	Pde6d		chr1	86542994	86582629	-	721	605	659	725	400	415	477	411	486	501	345	300	352	442	490	502	337	362	492
ENSMUSG00000102927	Gm37152		chr1	86580058	86581232	+	5	0	3	7	4	3	3	1	1	2	2	4	3	7	2	2	6	3	8
ENSMUSG00000026240	Cops7b		chr1	86582904	86609375	+	746	688	787	849	457	468	719	710	620	595	555	519	511	515	789	674	397	462	650
ENSMUSG00000103609	Gm37022		chr1	86638201	86640454	+	1	2	0	0	1	2	2	8	9	3	1	1	2	6	0	3	1	1	3
ENSMUSG00000026241	Nppc		chr1	86666291	86670571	-	4	4	7	1	3	3	27	38	59	31	30	39	42	1	7	11	5	9	2
ENSMUSG00000053333	Dis3l2	overlapping_locus	chr1	86703808	87050095	+	941	904	969	972	537	697	1031	917	916	776	717	802	626	607	936	868	612	637	599
ENSMUSG00000100225	Gm29097	overlapping_locus	chr1	86764944	86765365	-	0	0	0	0	0	0	0	5	0	5	1	0	0	0	6	0	0	0	0
ENSMUSG00000100768	Gm29055	overlapping_locus	chr1	86774819	86776528	+	0	0	0	1	1	0	0	0	0	0	0	0	0	1	0	0	0	1	1
ENSMUSG00000104121	Gm37485	overlapping_locus	chr1	86801075	86804027	+	0	0	1	5	1	0	0	1	3	0	0	0	0	0	0	0	0	0	0
ENSMUSG00000102383	Gm38142	overlapping_locus	chr1	86826101	86829655	+	0	0	0	0	1	0	0	0	0	0	1	0	0	1	1	1	0	2	0
ENSMUSG00000104400	Gm38010	overlapping_locus	chr1	86834995	86837778	+	0	2	0	5	0	1	0	0	0	0	0	3	2	0	0	2	0	0	3
ENSMUSG00000102293	Gm37541	overlapping_locus	chr1	86874350	86876664	+	1	1	2	0	0	2	1	2	2	3	2	4	2	0	1	2	1	3	0
ENSMUSG00000102649	Gm38021	overlapping_locus	chr1	86893573	86895132	+	43	57	46	41	148	28	20	49	20	11	33	23	18	34	28	19	51	10	20
ENSMUSG00000084106	Gm6136		chr1	86908793	86909683	-	119	100	92	116	106	65	109	111	106	100	108	100	73	100	91	90	128	82	112
ENSMUSG00000102571	Gm37967	overlapping_locus	chr1	86917992	86920656	+	22	24	10	3	15	7	16	15	4	9	10	4	9	14	13	17	9	6	7
ENSMUSG00000099401	Gm28375		chr1	86929387	87057596	-	0	0	0	0	2	0	0	3	0	0	0	0	0	6	0	0	1	0	0
ENSMUSG00000102956	Gm37017	overlapping_locus	chr1	86988270	86989016	+	1	1	5	1	14	4	0	2	0	3	0	1	1	0	0	2	3	1	0
ENSMUSG00000103984	Gm37447	overlapping_locus	chr1	87036723	87039650	+	58	61	103	82	51	45	92	40	36	45	39	37	36	70	77	77	44	22	50
ENSMUSG00000101940	Akp-ps1		chr1	87067672	87071098	+	52	48	43	63	31	22	12	13	28	15	20	15	7	28	47	32	10	21	26
ENSMUSG00000099839	Gm29374		chr1	87142874	87146983	-	0	0	0	0	0	0	0	0	2	0	0	1	0	0	0	0	0	0	0
ENSMUSG00000026247	Ecel1		chr1	87147655	87156521	-	3	17	5	9	1	7	46	20	30	35	15	26	16	9	0	1	2	2	1
ENSMUSG00000026251	Chrnd		chr1	87190607	87200070	+	128	113	108	58	110	64	29	59	60	67	32	36	40	52	101	102	103	64	37
ENSMUSG00000026253	Chrng		chr1	87204657	87212694	+	1	3	1	3	2	5	2	1	0	5	5	2	0	0	6	1	3	2	0
ENSMUSG00000026254	Eif4e2		chr1	87213914	87240488	+	2345	2201	2418	2869	1411	1622	2655	2517	2551	2556	2238	2081	1867	1916	2377	2218	1544	1738	2133
ENSMUSG00000088318	Gm26187		chr1	87251148	87251248	+	2	0	0	0	2	1	0	0	0	0	0	0	0	0	0	0	1	0	0
ENSMUSG00000026255	Efhd1		chr1	87264363	87310839	+	285	237	235	251	153	208	200	217	208	200	144	224	153	154	168	134	160	124	145
ENSMUSG00000048000	Gigyf2		chr1	87326998	87450796	+	3254	3045	3307	3905	1607	2141	3276	3243	3223	3081	2372	2520	2287	2948	3101	2897	1222	1962	2506
ENSMUSG00000079436	Kcnj13		chr1	87386363	87394729	-	2	23	24	9	10	7	5	7	7	0	3	2	5	21	21	11	0	6	18
ENSMUSG00000089613	Gm23504		chr1	87415255	87415349	-	2	2	3	5	5	1	0	1	1	0	2	1	4	0	0	1	2	1	0
ENSMUSG00000026258	Snorc		chr1	87470271	87475482	+	713	662	457	773	564	340	276	196	260	200	195	105	208	364	466	401	686	314	327
ENSMUSG00000026259	Ngef	overlapping_locus	chr1	87476834	87573870	-	917	959	847	904	409	681	447	519	632	474	292	367	425	655	765	652	389	467	598
ENSMUSG00000079434	Neu2	overlapping_locus	chr1	87509889	87597845	+	200	138	150	52	155	56	160	146	166	145	75	135	160	86	115	117	73	100	71
ENSMUSG00000091123	Gm17181	overlapping_locus	chr1	87514175	87514297	+	0	0	0	0	3	1	0	0	0	1	1	0	0	4	0	4	0	3	0
ENSMUSG00000090994	Gm6153	overlapping_locus	chr1	87543635	87544692	-	1	0	3	0	1	0	1	2	0	0	4	1	2	0	0	3	0	3	0
ENSMUSG00000026288	Inpp5d		chr1	87620312	87720507	+	1085	897	1246	1571	350	582	858	855	925	974	798	615	703	877	1150	1202	555	809	1124
ENSMUSG00000026289	Atg16l1	ncRNA_host	chr1	87755870	87792428	+	1777	1890	1980	2234	1084	1249	1500	1497	1396	1447	1215	1261	1019	1358	1908	1636	822	1128	1514
ENSMUSG00000087968	Gm25395		chr1	87776938	87777209	+	12	2	3	3	8	4	1	1	0	0	1	4	2	1	0	1	0	0	0
ENSMUSG00000089281	Scarna6		chr1	87784556	87784820	+	7	0	19	12	23	2	1	1	5	2	1	10	1	2	12	5	1	7	8
ENSMUSG00000056055	Sag		chr1	87803680	87845158	+	28	55	49	62	64	34	45	17	19	31	14	20	10	56	51	49	62	39	52
ENSMUSG00000070738	Dgkd	overlapping_locus	chr1	87853287	87945180	+	2695	2467	2806	2990	1260	1701	1664	1443	1605	1519	1118	1104	1276	1914	2375	2449	1320	1599	2359
ENSMUSG00000101942	Gm19582		chr1	87853347	87854299	-	0	0	1	3	0	3	1	2	1	1	1	0	5	0	0	4	0	0	3
ENSMUSG00000103996	4833421G17Rik	overlapping_locus	chr1	87865073	87865916	+	0	2	0	0	0	0	0	0	0	0	0	0	0	0	0	1	0	2	0
ENSMUSG00000103591	Gm38365	overlapping_locus	chr1	87897540	87900532	+	13	4	6	5	12	5	12	2	4	1	7	5	2	0	5	0	13	2	7
ENSMUSG00000005501	Usp40		chr1	87945119	88008551	-	1191	1092	1438	1553	614	797	1395	1195	1255	1336	925	872	967	1056	1484	1254	468	729	1233
ENSMUSG00000084021	Gm5832	pseudo_consens	chr1	88022381	88023962	+	0	0	0	0	0	0	1	0	0	0	0	0	1	0	0	0	0	0	0
ENSMUSG00000089675	Ugt1a8	overlapping_locus	chr1	88087813	88219004	+	0	0	0	0	0	0	0	0	6	0	1	0	0	3	1	0	0	4	0
ENSMUSG00000090124	Ugt1a7c	overlapping_locus	chr1	88095062	88220002	+	152	140	160	218	55	80	528	398	550	369	252	397	360	179	318	295	89	244	225
ENSMUSG00000090145	Ugt1a6b	overlapping_locus	chr1	88103252	88219003	+	22	46	26	38	11	19	42	32	33	35	20	25	31	26	26	27	11	21	20
ENSMUSG00000084195	Gm15372	overlapping_locus	chr1	88126776	88127609	+	0	0	0	1	0	0	3	0	0	0	0	1	0	0	0	0	0	0	0
ENSMUSG00000081261	Gm15370	overlapping_locus	chr1	88129581	88129833	+	2	0	0	0	0	0	4	0	1	0	0	1	0	0	0	0	0	0	0
ENSMUSG00000054545	Ugt1a6a	overlapping_locus	chr1	88134809	88218997	+	280	255	241	343	121	149	220	207	240	233	142	140	174	213	298	356	68	136	289
ENSMUSG00000082513	Gm15374	overlapping_locus	chr1	88151038	88151881	+	0	0	0	6	0	1	4	0	2	2	1	1	2	1	1	7	0	1	0
ENSMUSG00000082677	Gm15371	overlapping_locus	chr1	88153788	88154571	+	2	5	0	1	1	1	2	5	1	3	0	2	1	1	1	0	1	0	1
ENSMUSG00000089943	Ugt1a5	overlapping_locus	chr1	88166012	88218997	+	3	1	5	8	0	2	7	3	5	6	0	2	1	1	5	1	0	2	5
ENSMUSG00000081488	Gm15368	overlapping_locus	chr1	88186662	88187519	+	3	1	1	1	4	6	2	1	3	4	0	4	3	4	3	2	0	1	8
ENSMUSG00000083277	Gm15376	overlapping_locus	chr1	88191901	88192683	+	0	0	1	0	1	2	2	0	3	3	2	1	1	0	4	0	1	0	0
ENSMUSG00000090171	Ugt1a2	overlapping_locus	chr1	88200601	88218997	+	3	3	2	0	3	0	3	1	3	9	1	1	1	0	7	1	1	0	2
ENSMUSG00000081984	Dnajb3	overlapping_locus	chr1	88204732	88205782	-	131	154	148	171	86	123	167	135	129	136	110	89	110	105	175	140	116	113	116
ENSMUSG00000089960	Ugt1a1	overlapping_locus	chr1	88211959	88218997	+	677	701	743	949	224	538	464	560	514	423	319	358	434	654	779	667	493	540	556
ENSMUSG00000079429	Mroh2a		chr1	88226986	88262289	+	243	317	347	345	188	154	263	233	226	230	189	153	158	188	262	239	201	154	230
ENSMUSG00000044783	Hjurp		chr1	88262471	88277633	-	7045	7398	7863	9545	3872	5573	6926	5964	5948	6582	5119	4891	4521	6495	8068	7070	4405	5034	6694
ENSMUSG00000036251	Trpm8		chr1	88277661	88389293	+	1	0	0	1	1	5	5	6	14	13	2	16	3	2	6	5	0	2	7
ENSMUSG00000026295	Spp2		chr1	88406961	88426438	+	0	0	7	3	0	0	2	2	0	0	0	1	2	0	1	0	0	0	0
ENSMUSG00000099553	Gm29538		chr1	88443969	88462608	-	4	5	12	4	14	14	4	2	1	13	6	4	4	9	20	2	11	6	6
ENSMUSG00000100908	Gm28888		chr1	88459683	88465558	+	0	0	0	0	0	1	7	0	2	1	3	1	1	0	0	2	0	1	0
ENSMUSG00000062310	Glrp1		chr1	88499871	88510066	-	2	1	5	1	2	3	4	0	0	3	1	3	3	1	1	0	1	1	4
ENSMUSG00000100798	Gm19589		chr1	88551517	88562167	+	2	7	2	2	5	8	1	2	6	3	3	6	1	6	3	3	2	4	4
ENSMUSG00000104057	Gm38130		chr1	88653085	88654845	+	0	0	0	0	0	3	1	2	0	1	2	1	1	1	1	5	1	2	4
ENSMUSG00000100367	Gm29336		chr1	88656308	88658100	+	6	2	1	6	5	3	5	1	0	2	1	3	1	7	0	4	1	4	8
ENSMUSG00000049866	Arl4c		chr1	88673125	88702221	-	4436	4879	4394	4998	1713	3203	2765	2295	2965	2482	2082	2090	2087	3216	3797	3904	2116	2548	2726
ENSMUSG00000097398	Platr5		chr1	88754890	88755736	+	1	1	0	2	1	1	0	0	0	0	1	0	1	0	0	0	1	0	1
ENSMUSG00000036206	Sh3bp4	overlapping_locus	chr1	89070415	89155068	+	967	784	833	991	460	600	625	702	856	693	614	527	567	570	607	659	614	530	566
ENSMUSG00000102700	Gm38312	overlapping_locus	chr1	89097073	89098818	+	4	9	6	7	11	8	14	9	5	17	21	10	15	3	6	1	12	3	5
ENSMUSG00000101288	Gm28342		chr1	89302719	89358144	-	0	0	0	0	0	0	0	0	2	0	1	0	0	0	0	0	0	0	0
ENSMUSG00000055013	Agap1	overlapping_locus	chr1	89454806	89897617	+	1580	1379	1597	1665	694	941	1257	1084	1295	1286	1091	992	982	1019	1360	1269	926	893	1106
ENSMUSG00000104114	Gm37297	overlapping_locus	chr1	89483438	89485821	+	0	3	2	0	4	1	0	2	0	2	1	1	2	0	2	2	1	0	0
ENSMUSG00000088371	Gm25180		chr1	89563360	89563474	+	0	0	0	3	14	1	0	0	1	0	3	1	0	3	4	0	3	0	0
ENSMUSG00000101662	Gm28499	overlapping_locus	chr1	89568765	89576602	+	1	9	3	0	0	2	2	0	0	5	0	1	1	0	0	0	0	1	1
ENSMUSG00000102009	4933400F21Rik		chr1	89650529	89683908	-	0	1	0	0	0	0	0	0	16	0	0	0	0	0	0	0	1	2	2
ENSMUSG00000103252	Gm37521	overlapping_locus	chr1	89825481	89827525	+	3	0	5	7	0	3	0	0	0	3	0	1	0	1	3	1	4	0	0
ENSMUSG00000034486	Gbx2		chr1	89927956	89931179	-	0	3	2	0	0	0	0	0	0	8	0	0	0	0	0	0	3	1	0
ENSMUSG00000092627	D130058E05Rik		chr1	89930234	89933290	+	0	0	0	0	0	3	4	3	2	2	2	3	2	1	0	1	0	0	0
ENSMUSG00000067081	Asb18		chr1	89950220	90014666	-	45	46	27	12	27	14	12	11	17	16	10	7	19	8	11	24	11	13	17
ENSMUSG00000026301	Iqca		chr1	90042132	90153401	-	0	0	0	1	0	0	0	4	0	3	1	2	1	4	0	0	2	0	0
ENSMUSG00000044337	Ackr3		chr1	90203980	90216751	+	1826	1520	1579	1622	859	873	1270	1424	1183	1179	1062	857	946	1122	1458	1399	1037	1141	1101
ENSMUSG00000104087	Gm38277		chr1	90227160	90228526	-	0	0	0	0	0	0	2	0	2	5	0	2	1	0	1	0	0	1	0
ENSMUSG00000101951	Gm28721		chr1	90255276	90260120	-	6	3	10	3	5	1	0	0	3	1	2	2	1	1	2	0	2	1	1
ENSMUSG00000101028	Gm28723		chr1	90280458	90283912	+	9	5	7	13	7	1	4	1	0	5	5	1	4	21	7	2	11	5	5
ENSMUSG00000101997	Gm28722		chr1	90453394	90454501	-	0	11	0	1	0	1	1	0	0	0	1	0	0	0	4	1	0	0	1
ENSMUSG00000103292	Gm35048		chr1	90520496	90523297	+	4	2	1	4	2	2	1	8	0	0	2	0	1	1	2	7	1	2	4
ENSMUSG00000034432	Cops8		chr1	90602981	90613341	+	1778	1915	1767	1860	1100	1217	1546	1508	1530	1388	1423	1239	1201	1262	1704	1618	1179	1157	1381
ENSMUSG00000056128	Gm9991		chr1	90675161	90679793	+	19	9	8	17	4	7	5	0	3	4	1	1	3	2	12	4	5	7	2
ENSMUSG00000048126	Col6a3	overlapping_locus	chr1	90765923	90843971	-	14338	11246	13080	16853	6042	8540	12267	11493	11946	11267	8940	9402	8627	10207	11510	10997	5858	8027	6951
ENSMUSG00000103061	Gm36970	overlapping_locus	chr1	90837275	90839133	-	0	0	3	0	0	1	2	0	0	0	1	0	0	0	0	0	0	0	0
ENSMUSG00000026303	Mlph		chr1	90915085	90951142	+	283	217	226	280	74	152	209	125	141	195	116	120	138	145	160	198	158	135	238
ENSMUSG00000026304	Rab17		chr1	90958133	90969661	-	65	38	60	98	76	23	30	10	30	32	15	19	23	65	41	30	51	22	54
ENSMUSG00000026305	Lrrfip1		chr1	90998737	91128944	+	3143	2729	3035	3279	1889	2102	3781	4791	4347	3707	3585	3674	3057	2285	3479	3046	1247	2545	2430
ENSMUSG00000070732	Rbm44		chr1	91145089	91170795	+	6	2	7	2	0	1	4	1	2	5	1	1	3	1	0	3	3	2	3
ENSMUSG00000100018	Gm7776	pseudo_consens	chr1	91171429	91172148	-	1	0	2	4	4	2	1	4	3	0	4	1	1	1	1	0	1	3	4
ENSMUSG00000034353	Ramp1		chr1	91179822	91225196	+	771	864	739	955	784	501	546	389	478	581	446	419	369	475	514	650	759	513	583
ENSMUSG00000034343	Ube2f		chr1	91250304	91290337	+	1309	1425	1455	1666	704	1040	1434	1336	1332	1234	1097	1210	1084	1196	1522	1318	757	1077	1263
ENSMUSG00000083064	Gm7785	pseudo_consens	chr1	91296045	91296936	+	18	9	14	25	10	10	6	16	11	6	11	17	5	8	15	9	2	9	9
ENSMUSG00000026307	Scly		chr1	91298338	91321075	+	373	369	428	592	264	324	465	318	371	370	304	310	293	383	454	408	293	303	387
ENSMUSG00000090322	Gm17090		chr1	91305092	91321101	-	0	5	0	5	1	2	12	3	1	0	1	1	0	0	0	2	0	2	1
ENSMUSG00000049515	Espnl		chr1	91322075	91348306	+	9	12	31	13	6	5	5	3	11	3	5	9	4	8	17	12	6	14	15
ENSMUSG00000026308	Klhl30		chr1	91351016	91362416	+	149	152	133	116	228	124	65	104	89	117	90	82	104	81	103	184	195	124	63
ENSMUSG00000047443	Erfe		chr1	91366430	91374217	+	11	35	18	32	17	11	58	34	38	36	28	20	29	10	28	20	11	20	13
ENSMUSG00000026309	Ilkap		chr1	91373861	91398815	-	2377	2405	2420	2850	1611	1636	1767	1692	1851	1667	1457	1385	1332	1707	2351	2108	1255	1422	2024
ENSMUSG00000100253	1700020N18Rik		chr1	91404879	91406029	-	0	0	0	2	0	2	0	0	0	0	0	0	0	0	0	0	0	1	0
ENSMUSG00000067071	Hes6		chr1	91411483	91414038	-	561	585	509	728	333	381	358	294	344	344	296	271	284	427	470	555	406	359	442
ENSMUSG00000055866	Per2		chr1	91415982	91459324	-	2417	2051	2155	2619	684	883	1265	1360	1166	913	429	652	956	1687	2275	1925	527	1102	1868
ENSMUSG00000034292	Traf3ip1		chr1	91494647	91529307	+	449	342	403	477	227	309	342	307	286	350	238	281	218	338	374	295	194	276	331
ENSMUSG00000026311	Asb1		chr1	91540544	91559589	+	540	421	608	571	320	377	349	249	320	282	236	209	224	287	372	429	233	287	319
ENSMUSG00000101705	Gm28380		chr1	91611406	91624500	+	0	0	5	0	0	1	0	0	0	0	1	0	0	0	0	0	0	1	0
ENSMUSG00000100980	Gm29100		chr1	91798528	91802937	-	42	20	33	33	15	26	16	15	13	6	17	10	3	17	27	22	6	15	23
ENSMUSG00000007805	Twist2	overlapping_locus	chr1	91801461	91848028	+	241	252	223	352	95	184	248	181	146	198	155	189	140	167	173	177	202	191	197
ENSMUSG00000101414	Gm29101	overlapping_locus	chr1	91822515	91823985	+	14	24	6	16	57	9	16	21	6	12	16	13	4	6	20	10	62	5	15
ENSMUSG00000102745	Gm37600		chr1	91916260	91919551	+	0	2	4	1	2	1	0	0	8	3	0	0	0	2	0	0	2	1	2
ENSMUSG00000026313	Hdac4	overlapping_locus	chr1	91928779	92195699	-	1734	1662	1765	1889	1061	1193	1582	1683	1826	1474	1221	1130	1049	1176	1693	1541	1082	1010	1069
ENSMUSG00000103101	Gm37048		chr1	91975987	91981564	+	0	0	2	11	0	1	0	0	0	0	2	1	0	2	11	2	1	1	2
ENSMUSG00000102565	Gm37036	overlapping_locus	chr1	92019592	92022097	-	0	0	0	0	0	0	0	0	0	4	0	2	1	0	0	0	0	5	0
ENSMUSG00000026260	Ndufa10	ncRNA_host	chr1	92439010	92473860	-	3588	3621	3427	3781	2347	2726	4097	3925	3620	3819	3585	3071	2966	2932	3406	3457	3910	3022	2858
ENSMUSG00000063583	Olfr1410		chr1	92605782	92614806	+	0	0	0	0	1	0	0	0	0	0	0	0	0	0	1	0	0	0	2
ENSMUSG00000061616	Olfr12		chr1	92617788	92623412	+	2	8	6	14	5	4	0	0	4	0	1	1	0	2	2	3	2	4	0
ENSMUSG00000073616	Cops9		chr1	92637145	92641985	-	1118	1272	998	1443	1167	733	1458	1072	1339	1462	1541	1003	1053	841	1159	1108	1280	843	1341
ENSMUSG00000044055	Otos		chr1	92644218	92648841	-	118	73	47	44	110	50	14	13	23	35	21	14	15	59	47	59	51	44	20
ENSMUSG00000100546	Gm29483		chr1	92714234	92717202	-	7	0	3	10	11	3	3	3	4	2	1	4	5	0	0	0	0	1	2
ENSMUSG00000100781	Gm29481		chr1	92820958	92837896	-	0	0	0	1	0	2	0	5	0	5	1	1	0	0	5	0	0	0	1
ENSMUSG00000034220	Gpc1	ncRNA_host	chr1	92831645	92860779	+	4192	3481	3286	3587	2450	2635	3819	3577	3873	3525	2907	2406	2354	2750	3199	3850	2651	2342	1798
ENSMUSG00000101995	Gm29480		chr1	92842177	92848771	-	12	0	7	4	4	1	11	0	9	2	0	0	2	0	5	4	1	1	4
ENSMUSG00000034212	Ankmy1		chr1	92859803	92902906	-	26	43	32	27	10	25	21	6	4	21	18	17	10	33	24	23	18	14	21
ENSMUSG00000047067	Dusp28		chr1	92906981	92908435	+	457	427	373	554	296	302	368	262	323	288	265	268	259	359	494	384	316	292	328
ENSMUSG00000097251	5033417F24Rik		chr1	92908378	92910764	-	107	96	101	116	46	68	87	65	58	46	38	73	46	101	121	64	25	63	88
ENSMUSG00000026269	Rnpepl1		chr1	92910783	92924384	+	6329	6366	5976	7323	2655	4210	5989	5780	5939	5034	4323	4433	4159	4818	6385	5820	3854	3846	4613
ENSMUSG00000100632	9430060I03Rik		chr1	92933526	92950590	-	39	17	32	44	29	18	30	7	34	28	5	18	25	16	32	15	21	15	32
ENSMUSG00000026270	Capn10		chr1	92934376	92947941	+	1406	1564	1396	1795	695	1076	1523	1409	1425	1393	1147	1156	1002	1191	1654	1297	855	1000	1157
ENSMUSG00000026271	Gpr35		chr1	92950865	92986391	+	173	179	169	198	73	151	306	316	202	277	334	247	140	163	182	184	90	144	143
ENSMUSG00000014602	Kif1a		chr1	93015464	93101951	-	399	268	383	385	201	247	195	187	197	150	136	109	136	165	264	204	236	176	188
ENSMUSG00000026272	Agxt		chr1	93135240	93145421	+	1	12	5	23	2	1	10	6	13	12	8	10	11	9	18	16	3	8	8
ENSMUSG00000034159	Mab21l4		chr1	93151349	93160948	-	1267	1071	1165	1626	417	612	1815	1763	1883	1457	1041	1240	1429	1000	1366	1278	515	802	1004
ENSMUSG00000084989	Crocc2		chr1	93168725	93231072	+	104	80	87	131	59	86	50	86	95	93	49	76	49	81	137	84	27	76	50
ENSMUSG00000047793	Sned1	ncRNA_host	chr1	93235841	93301065	+	4934	3213	4893	6114	1578	3035	3187	2796	2789	2764	1407	1654	1911	3364	4260	3451	919	1952	3486
ENSMUSG00000098997	Mir6901		chr1	93274549	93274610	+	1	0	5	1	3	0	1	1	0	0	0	0	0	0	5	0	0	0	4
ENSMUSG00000026273	Mterf4		chr1	93299211	93305915	-	379	418	408	394	210	235	402	341	265	334	277	295	261	291	326	408	200	261	296
ENSMUSG00000101172	Gm28535		chr1	93305964	93317309	+	2	9	2	2	2	2	4	4	5	3	3	2	3	9	3	5	0	3	0
ENSMUSG00000100351	Gm7867	pseudo_consens	chr1	93306694	93307239	-	4	3	0	0	0	2	1	2	2	9	4	2	2	1	1	4	0	2	0
ENSMUSG00000026274	Pask		chr1	93308770	93343482	-	292	265	260	341	151	212	380	306	274	431	278	285	219	229	279	202	140	188	187
ENSMUSG00000026275	Ppp1r7	ncRNA_host	chr1	93342854	93373489	+	1477	1391	1512	1652	872	1045	1446	1464	1430	1386	1231	1082	1128	1057	1286	1311	800	993	1056
ENSMUSG00000064389	Gm26446		chr1	93363255	93363357	+	0	1	1	3	4	1	1	3	2	4	1	0	0	0	2	3	0	0	5
ENSMUSG00000034107	Ano7		chr1	93373930	93404303	+	708	581	575	775	138	400	797	572	694	661	271	366	504	581	850	714	165	319	687
ENSMUSG00000034088	Hdlbp		chr1	93405940	93478815	-	14984	13305	14111	15415	6589	10584	14891	15309	15019	13682	12084	11887	11291	11426	13835	13491	8379	9929	9487
ENSMUSG00000090489	Gm17415		chr1	93421700	93422488	+	3	3	3	3	5	5	10	5	9	13	3	2	5	6	3	3	2	2	4
ENSMUSG00000026276	Septin2		chr1	93478964	93510260	+	208	160	171	195	96	110	144	149	134	132	114	114	103	149	165	186	45	119	196
ENSMUSG00000034066	Farp2	overlapping_locus	chr1	93512079	93621976	+	442	463	503	555	173	296	354	416	438	329	265	305	199	395	409	395	198	273	265
ENSMUSG00000103854	Gm37250	overlapping_locus	chr1	93531815	93534202	+	0	1	2	0	4	0	2	3	0	1	4	0	1	3	1	1	0	2	2
ENSMUSG00000026277	Stk25		chr1	93619751	93658659	-	3418	2983	3498	3848	1906	2299	3026	2920	2450	2613	2236	2207	2141	2687	3133	2895	1885	2312	3344
ENSMUSG00000100927	Gm28536		chr1	93635193	93636509	+	0	1	0	1	0	2	5	0	0	2	0	0	1	0	5	3	2	1	0
ENSMUSG00000026278	Bok		chr1	93685660	93695764	+	2595	2620	1986	2477	1528	1778	2456	2734	2488	2070	2404	2004	1501	1479	2827	2079	1836	1600	1390
ENSMUSG00000026279	Thap4		chr1	93701935	93754864	-	1129	1272	1055	1336	666	880	1332	1297	1287	1121	1156	1122	982	867	1158	1205	978	810	810
ENSMUSG00000101952	Gm10550		chr1	93731104	93751072	+	1	0	1	0	0	0	0	0	3	0	2	0	3	0	0	0	0	0	0
ENSMUSG00000026280	Atg4b		chr1	93751500	93790610	+	2091	1966	1995	2164	907	1396	1844	1725	1866	1881	1529	1538	1296	1504	1754	1823	1125	1277	1532
ENSMUSG00000026281	Dtymk		chr1	93792576	93801934	-	1039	1154	921	1468	764	732	1113	1077	1082	1111	990	742	744	794	1006	931	691	667	897
ENSMUSG00000026283	Ing5		chr1	93803965	93822101	+	1140	1085	1091	1226	552	788	1153	1181	1150	1208	964	1092	859	858	1239	981	514	792	925
ENSMUSG00000073609	D2hgdh		chr1	93824909	93852348	+	468	380	402	461	243	350	372	358	359	372	223	273	327	449	351	428	253	262	343
ENSMUSG00000094651	Gal3st2		chr1	93861306	93876494	+	2	0	0	2	0	4	2	0	1	0	3	0	2	0	0	0	0	4	6
ENSMUSG00000093805	Gal3st2b		chr1	93918311	93942650	+	0	0	0	0	0	0	0	4	0	0	1	1	0	0	0	0	0	1	0
ENSMUSG00000073608	Gal3st2c		chr1	93990509	94017147	+	0	0	0	1	0	0	1	2	0	2	0	1	0	0	1	0	2	2	1
ENSMUSG00000026285	Pdcd1		chr1	94038305	94052553	-	18	5	0	2	8	4	58	88	20	61	50	36	41	27	45	14	11	30	22
ENSMUSG00000100347	Gm7895	pseudo_consens	chr1	94468715	94469887	-	17	3	12	8	16	6	10	22	5	7	8	11	8	2	6	4	2	1	1
ENSMUSG00000051185	Fam174a	overlapping_locus	chr1	95313623	95335284	+	1269	1169	1049	1350	612	877	836	856	970	729	647	611	616	878	1055	1001	621	769	896
ENSMUSG00000103973	BC055308	overlapping_locus	chr1	95328681	95331218	+	40	42	46	72	40	30	25	26	22	33	19	31	25	41	30	21	30	12	23
ENSMUSG00000081051	Gm15427	pseudo_consens	chr1	95498621	95499151	+	333	522	330	492	451	282	384	356	308	376	307	301	292	343	486	347	504	273	394
ENSMUSG00000040710	St8sia4	overlapping_locus	chr1	95587682	95667571	-	337	286	448	448	95	181	221	178	296	318	206	215	188	222	301	365	85	252	401
ENSMUSG00000103197	Gm37642	overlapping_locus	chr1	95646774	95648508	-	2	0	1	0	4	0	0	0	0	3	4	0	0	2	0	0	0	0	2
ENSMUSG00000100777	4930598F16Rik		chr1	95701184	95716518	-	1	0	4	0	1	2	0	0	0	0	0	0	0	0	0	0	0	1	0
ENSMUSG00000100362	Gm1833	pseudo_consens	chr1	96645420	96646170	+	0	0	2	0	0	0	0	0	0	0	0	0	2	1	0	0	0	0	0
ENSMUSG00000040693	Slco4c1		chr1	96816270	96872171	-	27	5	10	7	8	4	66	34	51	47	23	22	31	6	20	9	1	7	6
ENSMUSG00000097814	Panct2		chr1	96871126	96907796	+	4	1	2	3	0	2	0	0	2	0	3	0	2	4	2	1	1	0	3
ENSMUSG00000044757	Gm6430		chr1	97024681	97025928	+	1	4	0	4	0	1	6	0	2	1	3	2	4	8	2	0	5	1	5
ENSMUSG00000100484	Gm7133		chr1	97162860	97310664	+	0	0	0	0	0	0	0	2	0	0	0	0	0	0	0	0	0	1	0
ENSMUSG00000044768	D1Ertd622e		chr1	97606318	97662074	-	586	531	482	582	267	367	573	664	621	578	540	450	452	435	666	535	254	434	419
ENSMUSG00000118489	AC099860.1		chr1	97660831	97662274	+	0	0	0	0	0	1	0	0	0	0	0	0	0	0	0	5	1	0	0
ENSMUSG00000040648	Ppip5k2		chr1	97706048	97770411	-	1121	933	1219	1184	451	802	1351	1168	1212	1222	991	958	890	1049	1222	1018	273	761	867
ENSMUSG00000026333	Gin1		chr1	97770172	97793709	+	238	373	384	322	198	221	292	215	291	269	221	204	219	199	323	322	117	194	285
ENSMUSG00000026335	Pam	overlapping_locus	chr1	97795114	98095646	-	17999	15330	17712	17412	8719	10425	8189	8267	9970	9157	6623	5298	6578	10941	11401	12258	9665	9173	8656
ENSMUSG00000104140	Gm37140	overlapping_locus	chr1	97878382	97880065	-	4	0	15	16	0	5	6	0	3	9	3	1	2	3	13	9	0	5	7
ENSMUSG00000089169	Gm25413		chr1	97936400	97936711	+	2	1	1	0	0	0	1	0	1	0	0	0	0	0	0	1	0	0	2
ENSMUSG00000089782	Gm3531	overlapping_locus	chr1	97948901	97949389	-	166	162	193	168	105	129	207	213	167	208	210	175	174	135	145	158	144	146	178
ENSMUSG00000089706	B230216N24Rik	overlapping_locus	chr1	98031116	98057680	-	71	52	56	65	60	49	44	55	36	27	30	29	34	77	71	40	11	23	77
ENSMUSG00000096085	Gm24465		chr1	98049822	98049928	+	0	0	0	5	4	0	0	0	0	1	0	0	0	0	1	1	0	0	2
ENSMUSG00000100182	1810006J02Rik		chr1	98131456	98144655	+	3	5	2	8	0	1	3	7	2	3	0	1	4	7	12	8	3	0	7
ENSMUSG00000099634	Gm29462	pseudo_consens	chr1	98267151	98267438	+	1	1	7	2	3	1	3	5	3	3	3	1	1	4	0	2	1	2	3
ENSMUSG00000089791	Gm3555	overlapping_locus	chr1	98457768	98459162	+	0	3	3	0	1	0	2	0	0	0	0	3	1	1	1	4	2	1	1
ENSMUSG00000100009	Gm7967		chr1	98589517	98607384	+	5	6	4	5	8	1	3	6	3	2	1	3	1	6	5	0	3	1	4
ENSMUSG00000099686	Gm29460	pseudo_consens	chr1	98764841	98765554	+	0	0	0	1	0	1	0	0	0	0	0	0	0	0	0	0	0	0	0
ENSMUSG00000082431	Prdx2-ps1	pseudo_consens	chr1	99790429	99791025	-	2	13	10	3	5	2	3	2	8	1	2	4	4	4	3	2	6	2	4
ENSMUSG00000099835	Gm29668		chr1	100282329	100282643	-	0	4	1	12	0	3	2	2	1	1	6	2	1	1	6	3	4	0	6
ENSMUSG00000100794	Gm29667	overlapping_locus	chr1	100282791	100283280	+	0	0	3	0	0	0	2	0	2	2	0	0	1	1	0	1	0	0	3
ENSMUSG00000100222	Psmb6-ps2	pseudo_consens	chr1	101385886	101386590	+	0	2	0	1	0	0	1	0	1	0	2	0	0	0	1	0	0	1	0
ENSMUSG00000100349	Gm28188	pseudo_consens	chr1	101880506	101880741	-	6	2	0	4	2	1	9	1	0	7	2	4	4	6	4	11	0	6	6
ENSMUSG00000099375	Gm28187		chr1	101892958	101895091	-	11	1	24	30	4	9	10	11	12	18	3	9	2	13	11	10	1	7	7
ENSMUSG00000050840	Cdh20	overlapping_locus	chr1	104768529	104995481	+	0	1	7	0	3	4	0	3	0	1	1	1	0	9	4	2	1	2	2
ENSMUSG00000047496	Rnf152		chr1	105276914	105356710	-	396	247	319	473	175	162	394	303	425	315	255	274	284	206	284	300	100	113	199
ENSMUSG00000097482	Gm17634		chr1	105356007	105361737	+	2	0	1	3	0	0	0	2	6	0	4	1	0	0	1	4	0	1	0
ENSMUSG00000101214	Gm28403	overlapping_locus	chr1	105382260	105569139	-	0	0	0	2	0	1	4	1	0	0	0	1	1	2	0	2	0	1	3
ENSMUSG00000067017	Capza1-ps1		chr1	105455971	105458829	+	23	20	31	30	15	23	25	41	42	39	22	27	26	24	16	24	13	20	25
ENSMUSG00000056536	Pign	overlapping_locus	chr1	105518422	105663677	-	1111	1217	1272	1340	534	890	1426	1428	1328	1231	958	979	864	1046	1441	1250	342	828	1013
ENSMUSG00000101219	Gm20302	pseudo_consens	chr1	105574537	105574811	+	8	6	7	6	6	7	6	2	1	7	13	1	8	14	12	11	11	4	16
ENSMUSG00000101656	Gm8004	pseudo_consens	chr1	105615742	105616358	+	0	0	0	2	0	0	0	4	0	0	0	0	1	1	2	0	0	0	0
ENSMUSG00000026319	Relch	overlapping_locus	chr1	105663861	105755191	+	2582	2783	2852	3244	1201	1795	2945	2640	3062	2714	2125	2363	1925	2088	2860	2584	781	1630	2159
ENSMUSG00000104044	Gm37566	overlapping_locus	chr1	105708573	105712927	+	13	8	5	12	46	11	16	12	5	6	7	4	8	2	9	7	15	5	18
ENSMUSG00000101330	Gm10193		chr1	105764444	105764674	+	1	0	0	1	0	1	0	0	0	0	2	2	1	0	0	0	2	1	0
ENSMUSG00000026321	Tnfrsf11a		chr1	105780718	105847981	+	902	809	1053	1083	318	622	656	627	678	591	369	321	486	907	940	829	288	418	827
ENSMUSG00000099843	Gm7160		chr1	105979350	105990282	-	211	197	203	225	90	144	199	152	173	149	87	115	107	179	243	172	82	127	197
ENSMUSG00000038866	Zcchc2		chr1	105990406	106034074	+	2309	1998	2057	2325	772	1420	1894	1917	1731	1690	1349	1516	1282	1745	2196	1833	614	1274	1654
ENSMUSG00000102501	Gm37372		chr1	106072584	106075894	-	0	0	0	12	4	0	3	0	1	0	0	0	0	0	2	0	5	0	1
ENSMUSG00000097612	Gm26509	pseudo_consens	chr1	106090068	106091015	+	0	0	2	0	0	0	0	0	0	1	0	0	1	1	0	0	0	1	0
ENSMUSG00000101583	Gm20753		chr1	106152625	106171524	-	21	15	6	16	5	6	5	14	7	2	7	3	4	1	3	4	3	5	3
ENSMUSG00000044340	Phlpp1	overlapping_locus	chr1	106171752	106394250	+	1178	1052	1038	1154	367	800	1027	992	1021	922	680	699	675	834	822	925	496	610	623
ENSMUSG00000103291	Gm38235	overlapping_locus	chr1	106219314	106224265	+	0	2	1	0	2	2	12	0	0	9	0	1	2	4	5	0	0	0	1
ENSMUSG00000100247	A530053M12Rik		chr1	106400178	106401987	-	0	0	0	0	1	1	8	0	0	2	2	1	1	0	0	0	0	1	0
ENSMUSG00000099604	Gm6651	pseudo_consens	chr1	106439600	106439870	+	1	0	0	0	0	1	0	0	0	0	0	0	1	0	0	0	0	0	0
ENSMUSG00000057329	Bcl2	overlapping_locus	chr1	106538178	106714274	-	911	709	930	1154	599	543	618	456	512	564	444	418	391	583	645	676	547	472	685
ENSMUSG00000054006	D630008O14Rik		chr1	106541943	106575045	+	1	0	0	0	0	0	1	0	0	0	0	0	0	0	0	0	1	0	0
ENSMUSG00000103348	Gm37053	overlapping_locus	chr1	106604784	106606870	-	1	0	2	0	0	0	4	0	2	5	0	0	0	0	0	0	0	0	1
ENSMUSG00000009905	Kdsr		chr1	106720459	106759727	-	2639	2687	2407	3271	1487	1963	2559	2448	2265	2339	1790	2026	1753	2198	3148	2335	1265	1881	2249
ENSMUSG00000009907	Vps4b		chr1	106764071	106796728	-	4224	4430	4528	4885	1661	3155	4903	4650	4702	4184	3830	4037	3366	3562	4548	4336	1775	3052	3154
ENSMUSG00000067006	Serpinb5		chr1	106861173	106883348	+	16304	17883	16823	16684	5441	11597	16980	18330	17072	14175	13925	15644	14190	12610	15645	14762	5769	10407	11636
ENSMUSG00000083613	Pou2f3-rs1	pseudo_consens	chr1	106887852	106888897	-	8	17	12	19	2	7	11	6	7	1	0	4	3	6	5	11	1	3	10
ENSMUSG00000059956	Serpinb12		chr1	106934449	106957080	+	2910	3626	3388	3911	985	2283	7269	9122	9370	5584	4683	7537	6137	3147	4654	4269	1279	2746	2382
ENSMUSG00000048775	Serpinb13		chr1	106980984	107001195	+	664	565	700	707	171	445	508	438	346	412	216	389	361	624	723	566	96	315	592
ENSMUSG00000084228	Gm8080		chr1	107020137	107025325	-	136	246	195	232	134	111	1293	994	1007	1375	827	828	735	527	728	474	99	328	362
ENSMUSG00000044594	Serpinb3a		chr1	107045587	107052303	-	61	75	130	140	167	102	3766	3941	3151	3096	2674	2646	2584	288	998	481	154	414	219
ENSMUSG00000058017	Serpinb3d		chr1	107078167	107083506	-	0	0	0	0	0	0	5	8	3	3	16	8	2	0	1	0	0	0	1
ENSMUSG00000073602	Serpinb3b		chr1	107153940	107278361	-	4023	4259	4589	5121	2068	3478	7090	6955	6310	7464	4568	5609	4708	4949	6439	4619	1110	3196	4972
ENSMUSG00000073601	Serpinb3c		chr1	107271201	107278371	-	0	0	0	1	1	1	7	16	1	4	12	10	6	3	4	0	0	0	1
ENSMUSG00000084189	Gm8089		chr1	107290341	107302354	-	0	0	0	0	0	0	2	0	0	0	3	0	1	0	0	0	1	0	0
ENSMUSG00000026327	Serpinb11		chr1	107361198	107380475	+	461	415	528	523	240	322	849	917	896	635	649	797	625	338	575	428	221	304	300
ENSMUSG00000087210	Gm15391		chr1	107385200	107387412	-	0	1	2	6	1	1	4	5	4	10	1	6	3	4	0	3	3	2	2
ENSMUSG00000067001	Serpinb7		chr1	107399655	107452689	+	5519	5402	5195	5156	1434	3134	2451	2882	2551	2404	1547	2564	2428	3691	3964	3635	1029	2333	3377
ENSMUSG00000089278	Gm24553		chr1	107440047	107440177	-	2	13	9	8	3	1	13	7	3	8	1	9	0	9	9	4	0	0	12
ENSMUSG00000062345	Serpinb2	overlapping_locus	chr1	107511423	107535478	+	5475	5400	4903	4559	1902	3336	3683	4908	4414	3121	3856	4630	3625	3391	4931	5199	1641	3961	3028
ENSMUSG00000092572	Serpinb10	overlapping_locus	chr1	107529003	107549271	+	1147	755	819	882	363	499	687	800	809	567	700	567	634	545	790	864	326	477	721
ENSMUSG00000026315	Serpinb8		chr1	107590006	107610484	+	4809	4430	4980	4769	1841	3345	4827	5095	4813	4089	3512	4417	4004	3820	5180	4359	1312	3076	3613
ENSMUSG00000086161	Gm15389		chr1	107687008	107693514	+	0	0	0	0	0	0	21	22	10	7	6	11	5	0	1	2	0	0	0
ENSMUSG00000100457	D830032E09Rik	overlapping_locus	chr1	107917259	108028337	+	0	0	0	0	4	0	0	0	0	0	0	0	0	0	0	5	0	0	0
ENSMUSG00000100041	Gm5702	pseudo_consens	chr1	108376970	108379438	-	0	0	8	5	2	1	5	0	3	0	0	0	1	2	7	2	1	5	0
ENSMUSG00000100025	Gm8141	pseudo_consens	chr1	109833024	109834746	+	1	1	0	0	2	1	0	0	0	0	3	0	0	0	0	0	0	0	0
ENSMUSG00000026312	Cdh7		chr1	109982431	110140157	+	9	13	19	10	1	7	16	3	2	2	2	6	3	3	11	3	2	4	15
ENSMUSG00000047216	Cdh19	overlapping_locus	chr1	110888326	110977584	-	656	356	502	613	194	330	154	199	220	183	123	136	201	350	346	317	145	210	275
ENSMUSG00000102788	Gm38255	overlapping_locus	chr1	110957831	110960826	-	10	2	9	35	1	3	5	0	7	5	5	4	0	11	8	12	3	3	1
ENSMUSG00000102160	Gm36944	overlapping_locus	chr1	110964679	110967437	-	8	0	9	4	0	2	2	3	1	7	1	0	0	1	1	4	0	4	4
ENSMUSG00000100555	Gm8173	pseudo_consens	chr1	111804934	111807775	-	15	25	28	24	88	25	12	21	10	23	13	17	9	19	12	12	20	17	9
ENSMUSG00000102728	Gm37934		chr1	111833823	111834224	+	0	0	0	3	0	1	1	0	0	1	0	1	0	0	0	0	0	0	0
ENSMUSG00000038702	Dsel		chr1	111858702	111864918	-	1333	1296	1520	1512	602	914	1192	1216	1236	1174	979	918	862	990	1191	1136	379	856	941
ENSMUSG00000101875	Gm6028	pseudo_consens	chr1	111880735	111881308	-	0	0	0	1	0	0	0	2	0	0	1	0	1	0	0	0	0	0	1
ENSMUSG00000101054	Gm18406		chr1	112404187	112404855	-	1	0	0	1	0	1	0	0	0	0	0	0	1	0	1	0	0	0	0
ENSMUSG00000097648	9330185C12Rik		chr1	113891385	113964134	-	0	1	1	0	0	0	0	0	0	4	0	0	0	0	0	0	0	1	7
ENSMUSG00000102030	Gm29106		chr1	118176542	118202307	+	10	11	1	18	1	5	6	4	8	6	10	10	6	1	0	3	0	3	4
ENSMUSG00000099870	Gm7200	pseudo_consens	chr1	118249863	118251025	+	0	1	0	0	0	0	0	0	0	0	0	1	0	0	0	0	0	0	0
ENSMUSG00000026374	Tsn		chr1	118294778	118311739	-	2755	2717	2558	3195	2120	2002	2596	2423	2679	2370	2137	1949	1730	1992	2289	2501	2087	1876	1997
ENSMUSG00000026377	Nifk		chr1	118321839	118333822	+	1093	1137	1020	1165	761	785	1230	1503	1250	1262	1316	1142	946	863	1177	1024	720	872	751
ENSMUSG00000099936	Gm28867		chr1	118357312	118363449	+	1	0	0	0	0	1	2	0	0	5	0	0	0	3	0	2	1	0	1
ENSMUSG00000064302	Clasp1		chr1	118389058	118612678	+	3937	3199	3618	3821	1483	2465	3625	3783	3853	3242	2508	2724	2347	2662	3396	3183	1482	2159	2137
ENSMUSG00000107722	2900060B14Rik	ncRNA_host	chr1	118458652	118459267	-	0	0	0	3	0	0	0	0	0	0	0	1	0	9	0	0	0	0	0
ENSMUSG00000100770	Gm28466	pseudo_consens	chr1	118478604	118479591	-	0	0	0	0	7	1	7	0	1	0	0	1	0	0	0	0	0	1	1
ENSMUSG00000026380	Tfcp2l1	ncRNA_host	chr1	118627945	118685168	+	131	87	96	124	71	84	77	65	93	104	89	83	58	84	62	119	62	85	66
ENSMUSG00000048402	Gli2		chr1	118834132	119053619	-	759	673	741	762	252	414	642	545	709	574	403	485	382	469	517	535	332	346	352
ENSMUSG00000097408	Gm26831		chr1	119058469	119059848	+	2	3	6	7	1	3	1	1	4	9	1	1	4	10	1	1	1	8	2
ENSMUSG00000099860	Gm29456		chr1	119305346	119326833	-	0	0	0	0	0	0	0	0	1	0	0	1	0	3	0	0	0	0	0
ENSMUSG00000101179	Gm29455		chr1	119329200	119385581	+	0	0	10	0	0	1	0	0	0	0	0	1	0	0	0	0	0	0	0
ENSMUSG00000037035	Inhbb		chr1	119415465	119422248	-	1730	1444	1677	1716	686	1047	1616	1534	1536	1505	1107	1143	1059	1173	1331	1240	967	1054	1380
ENSMUSG00000004451	Ralb		chr1	119470305	119504794	-	1244	1202	1336	1410	632	802	1435	1513	1385	1344	1163	1082	1059	921	1241	1049	675	839	976
ENSMUSG00000098447	Gm27184		chr1	119520090	119526359	-	10	8	3	7	8	8	6	10	7	3	9	3	9	4	16	7	6	2	10
ENSMUSG00000098923	Tmem185b	retrogene	chr1	119526160	119528983	+	438	400	395	538	197	271	521	450	357	379	348	300	332	377	414	408	245	276	302
ENSMUSG00000101731	3830432H09Rik		chr1	119529480	119536165	-	0	5	1	0	3	3	4	8	2	0	3	6	2	0	0	3	5	2	0
ENSMUSG00000026383	Epb41l5	overlapping_locus	chr1	119545037	119649000	-	680	651	736	656	238	447	662	543	627	588	445	514	458	515	606	610	203	467	509
ENSMUSG00000102687	Gm37219	overlapping_locus	chr1	119630744	119631669	-	0	0	0	0	6	0	0	0	0	0	0	0	0	0	0	1	0	0	0
ENSMUSG00000026384	Ptpn4	overlapping_locus	chr1	119652467	119837613	-	1446	1167	1828	1418	485	748	1195	1090	1143	1033	782	853	737	1000	1162	1084	303	717	1011
ENSMUSG00000091876	Gm3851	pseudo_consens	chr1	119787769	119788086	+	1	8	0	0	0	1	1	1	1	0	1	7	1	5	1	1	0	1	0
ENSMUSG00000103146	Gm37745	overlapping_locus	chr1	119790763	119798925	-	2	6	7	9	3	5	1	0	0	3	1	1	1	2	0	1	4	1	6
ENSMUSG00000100636	Gm3551		chr1	119897461	119898124	+	17	1	3	0	3	5	3	10	0	2	1	3	2	4	3	10	6	5	7
ENSMUSG00000101224	Gm28209		chr1	119903130	119906897	+	1	2	4	10	0	1	7	0	2	0	4	2	0	4	1	0	2	1	5
ENSMUSG00000036975	Tmem177		chr1	119907890	119913208	-	1077	953	1085	1265	480	738	352	285	289	271	189	309	268	720	605	774	351	533	641
ENSMUSG00000036962	Cfap221		chr1	119923341	119997234	-	6	8	7	14	1	6	1	1	3	0	1	0	0	18	1	8	3	6	0
ENSMUSG00000026387	Sctr		chr1	120006894	120063536	+	54	29	33	28	32	22	29	5	23	12	10	5	3	19	23	18	31	16	49
ENSMUSG00000050777	Tmem37		chr1	120067377	120074074	-	141	81	111	134	75	60	63	89	126	78	69	67	57	67	125	95	74	113	127
ENSMUSG00000026385	Dbi		chr1	120113280	120121078	-	4248	4774	3488	4167	2862	2754	4104	3825	3817	3625	3289	3238	3076	2792	3567	3336	2417	2514	2795
ENSMUSG00000026388	3110009E18Rik		chr1	120121187	120188189	+	67	68	45	51	26	34	63	47	54	59	57	47	45	48	66	50	42	43	55
ENSMUSG00000026389	Steap3		chr1	120190757	120272705	-	2301	1862	2270	2869	1092	1229	1832	1478	1635	1749	1219	889	1315	1461	1727	1964	1403	1269	1573
ENSMUSG00000036907	C1ql2		chr1	120340582	120343174	+	0	0	0	1	0	0	2	0	0	0	0	0	0	0	0	13	1	0	0
ENSMUSG00000026390	Marco		chr1	120474538	120505024	-	134	38	92	181	15	23	156	131	321	136	56	28	357	167	94	383	74	41	308
ENSMUSG00000058665	En1		chr1	120602418	120607992	+	11	2	0	2	6	3	4	6	10	7	5	4	4	2	6	0	0	1	1
ENSMUSG00000099957	2610027F03Rik		chr1	120621740	120690403	+	26	8	10	3	4	1	0	0	4	0	2	1	0	5	5	1	1	2	7
ENSMUSG00000101922	Gm29345		chr1	120816500	120836997	+	0	0	2	0	0	0	3	0	1	0	0	0	2	0	0	0	0	0	0
ENSMUSG00000102360	Gm37043		chr1	120868996	120872100	+	9	0	0	0	0	0	0	2	0	3	0	1	1	0	0	0	1	0	0
ENSMUSG00000104332	Gm38283		chr1	121300137	121300831	-	0	0	0	0	0	0	0	0	0	1	0	0	0	4	0	0	0	1	0
ENSMUSG00000003721	Insig2		chr1	121304353	121332589	-	2558	2224	2224	2724	1325	2175	2367	2332	2539	2292	1993	1950	1756	1906	2556	2363	1192	1908	2208
ENSMUSG00000104253	Gm37174		chr1	121328092	121331149	+	68	50	66	101	28	45	72	31	52	46	25	36	31	61	48	55	13	38	75
ENSMUSG00000101791	2210011K15Rik		chr1	121355116	121359900	-	0	10	4	4	2	7	2	5	2	21	2	5	2	2	0	5	2	5	1
ENSMUSG00000026339	Ccdc93		chr1	121431049	121506460	+	1303	1130	1325	1408	568	897	1249	1078	961	966	759	809	713	1207	1275	1179	492	747	1099
ENSMUSG00000085857	Gm15392		chr1	121489296	121493203	-	2	2	0	1	0	6	4	1	0	3	0	2	1	1	1	4	0	0	4
ENSMUSG00000050534	Htr5b		chr1	121509842	121528465	-	0	4	1	1	0	1	6	2	13	6	4	10	4	4	5	0	1	0	2
ENSMUSG00000001674	Ddx18		chr1	121553835	121567989	-	791	917	789	805	565	547	834	795	803	772	826	670	597	653	829	683	550	568	579
ENSMUSG00000036815	Dpp10	overlapping_locus	chr1	123321471	124846039	-	5	8	8	12	0	1	0	2	2	5	4	3	1	2	4	3	5	4	4
ENSMUSG00000101985	Gm28929	pseudo_consens	chr1	123756558	123757750	+	0	0	0	0	0	0	0	0	0	0	0	1	0	1	0	0	1	1	0
ENSMUSG00000026341	Actr3		chr1	125392905	125435727	-	6719	6630	6577	7147	3167	4633	7977	8213	8084	7760	7242	6373	6078	5477	7146	6364	3144	4904	5237
ENSMUSG00000102063	Gm28706		chr1	125444567	125447398	+	0	0	0	1	0	1	2	7	0	0	0	0	0	0	0	0	0	0	0
ENSMUSG00000026342	Slc35f5		chr1	125560595	125595820	+	3054	3156	3348	3596	1478	2284	3077	2586	2671	2238	1821	1996	2093	3030	3377	2934	1124	1976	2810
ENSMUSG00000026343	Gpr39		chr1	125676995	125873862	+	0	0	0	2	1	2	0	4	0	2	2	0	1	9	3	0	0	1	1
ENSMUSG00000026344	Lypd1		chr1	125867622	125913101	-	19	5	5	5	3	2	3	4	9	2	5	11	2	0	1	14	2	2	11
ENSMUSG00000049690	Nckap5	overlapping_locus	chr1	125913620	126830799	-	123	59	78	74	39	42	128	127	147	123	98	99	84	52	36	63	25	37	70
ENSMUSG00000104519	Gm37161	overlapping_locus	chr1	125919266	125921962	-	0	1	3	0	1	1	0	0	4	5	1	3	2	0	0	1	0	0	5
ENSMUSG00000102723	Gm37936	overlapping_locus	chr1	126070140	126071461	-	0	0	0	1	2	0	3	0	0	0	0	0	0	0	0	0	1	0	0
ENSMUSG00000036155	Mgat5	overlapping_locus	chr1	127205015	127488336	+	1573	1550	1550	1932	532	1035	1585	1296	1326	1308	991	1157	963	1206	1314	1338	669	869	994
ENSMUSG00000104039	Gm37772	overlapping_locus	chr1	127242091	127243484	+	0	0	3	0	0	0	0	0	3	0	1	0	0	4	4	2	0	0	0
ENSMUSG00000104378	Gm37510	overlapping_locus	chr1	127270524	127275285	+	3	0	12	6	49	1	3	3	1	4	5	1	3	5	3	2	18	0	5
ENSMUSG00000099471	Gm8451	pseudo_consens	chr1	127282662	127283108	-	3	11	12	5	7	7	15	3	4	5	6	3	14	4	8	14	12	10	8
ENSMUSG00000103390	Gm38301	overlapping_locus	chr1	127406776	127407318	+	0	0	1	0	0	0	0	0	0	0	2	0	0	1	0	0	0	0	1
ENSMUSG00000026347	Tmem163		chr1	127486546	127679548	-	2	2	3	5	1	0	0	1	3	6	9	5	1	0	0	2	1	4	1
ENSMUSG00000026348	Acmsd		chr1	127729413	127767978	+	2	0	0	3	3	4	0	2	3	6	2	2	1	5	0	0	0	1	8
ENSMUSG00000102014	2900009J06Rik		chr1	127753616	127774092	-	6	0	1	6	3	4	15	3	3	4	6	1	5	1	2	11	5	3	6
ENSMUSG00000026349	Ccnt2		chr1	127774164	127808061	+	3269	2953	3438	3824	1814	2111	2722	2583	2453	2673	1946	1982	1943	2608	3165	2676	852	1737	2895
ENSMUSG00000051590	Map3k19		chr1	127814791	127855031	-	15	15	15	15	15	10	9	9	11	6	6	8	6	9	12	5	3	3	5
ENSMUSG00000036104	Rab3gap1		chr1	127868773	127943868	+	2652	2443	2565	2808	1173	1820	2297	2206	2278	2199	1711	1804	1725	1844	2149	2304	1290	1549	1591
ENSMUSG00000036086	Zranb3	overlapping_locus	chr1	127954184	128103047	-	179	162	196	255	117	138	190	163	166	179	169	129	129	165	174	145	88	119	136
ENSMUSG00000099760	Gm28800		chr1	127959516	127967452	+	26	33	16	25	13	13	14	8	12	15	10	7	5	4	19	14	7	9	10
ENSMUSG00000104164	Gm38248	overlapping_locus	chr1	127978905	127984687	-	29	13	28	72	8	23	33	13	28	34	14	14	19	27	25	25	5	16	29
ENSMUSG00000058603	Rpl28-ps1		chr1	128038569	128038982	+	4	33	27	29	32	14	24	37	30	31	20	20	22	25	14	18	46	19	30
ENSMUSG00000102782	Gm37625	overlapping_locus	chr1	128084460	128089331	-	0	0	0	2	0	2	3	3	0	0	3	0	0	1	0	0	0	0	1
ENSMUSG00000103999	Gm38026	overlapping_locus	chr1	128097591	128101470	-	0	0	0	2	1	0	0	0	0	0	1	0	0	0	0	0	0	0	0
ENSMUSG00000056211	R3hdm1	overlapping_locus	chr1	128103301	128237736	+	2050	1496	2018	2142	1024	1324	1585	1514	1550	1633	1249	1272	1058	1533	1604	1621	764	1184	1450
ENSMUSG00000101535	Gm29383	pseudo_consens	chr1	128128410	128128889	-	2	0	0	0	0	0	1	0	0	0	0	0	1	0	0	0	0	0	0
ENSMUSG00000104239	Gm37588	overlapping_locus	chr1	128132157	128134652	+	7	0	8	3	1	0	0	3	3	0	0	1	0	0	0	1	0	0	1
ENSMUSG00000102179	Gm37868	overlapping_locus	chr1	128143614	128146348	+	0	2	0	1	0	0	0	0	4	3	0	1	0	0	2	0	1	1	0
ENSMUSG00000103497	Gm37407	overlapping_locus	chr1	128163214	128164529	+	1	0	1	15	3	0	0	3	2	1	3	2	2	2	3	0	8	1	2
ENSMUSG00000026353	Ubxn4		chr1	128243964	128279378	+	4021	3708	3949	4044	2720	2599	3742	3917	3645	3470	3038	2879	2864	3235	4005	3488	1925	2801	2969
ENSMUSG00000026354	Lct		chr1	128284756	128328318	-	8	24	9	20	4	10	14	9	8	4	11	8	11	8	14	9	0	10	9
ENSMUSG00000026355	Mcm6		chr1	128331590	128359664	-	1870	2243	1803	2253	995	1281	2734	2476	2582	2676	2352	1546	1642	1267	1884	1803	1176	1251	1093
ENSMUSG00000026356	Dars		chr1	128363707	128417368	-	2117	2141	2140	2100	1133	1437	2216	2410	2375	2077	1902	1713	1628	1677	1973	2061	802	1413	1452
ENSMUSG00000100078	Gm6170	pseudo_consens	chr1	128520073	128521460	-	13	15	22	17	11	18	15	22	22	28	24	18	24	11	22	23	19	20	18
ENSMUSG00000045382	Cxcr4		chr1	128588199	128592293	-	106	122	139	185	65	97	247	211	272	272	248	204	179	124	209	176	147	136	129
ENSMUSG00000042581	Thsd7b	overlapping_locus	chr1	129273302	130219278	+	44	27	36	30	24	25	13	10	6	13	4	4	5	13	7	23	21	24	4
ENSMUSG00000089648	Gm15790	pseudo_consens	chr1	129796608	129797858	-	2	0	0	0	1	1	0	1	0	1	0	0	0	2	0	0	0	2	0
ENSMUSG00000094122	Rpl31-ps9		chr1	129801387	129801764	-	0	1	0	0	2	2	0	0	0	1	0	2	2	0	1	0	3	3	4
ENSMUSG00000086633	Gm16081		chr1	130269950	130281258	-	0	0	0	0	1	0	0	0	2	0	0	0	1	0	0	0	1	0	0
ENSMUSG00000026401	Cd55b		chr1	130388537	130423009	-	1	1	0	0	0	1	1	0	1	0	2	0	0	0	1	0	0	0	1
ENSMUSG00000087691	Cd55os		chr1	130422824	130437914	+	211	130	235	175	79	95	128	112	78	104	54	47	88	151	210	157	36	76	235
ENSMUSG00000086825	Gm15675		chr1	130429781	130437191	-	708	575	760	692	343	363	466	398	367	485	247	255	447	606	797	563	180	318	957
ENSMUSG00000026399	Cd55		chr1	130439027	130462744	-	1540	1265	1787	1845	457	795	1015	905	926	1050	525	625	893	1290	1376	1298	335	755	1551
ENSMUSG00000085526	Gm16083	overlapping_locus	chr1	130462576	130557075	+	2	2	0	13	2	5	12	2	5	5	2	1	0	2	4	18	0	1	8
ENSMUSG00000102139	Gm37109	overlapping_locus	chr1	130467972	130470225	+	9	5	0	0	20	3	1	4	0	0	4	0	4	1	0	0	6	1	1
ENSMUSG00000103751	Gm37283	overlapping_locus	chr1	130473743	130475313	+	1	4	0	5	9	2	3	5	0	0	3	0	0	0	1	6	3	1	4
ENSMUSG00000026405	C4bp		chr1	130634773	130661632	-	6	0	0	1	2	1	0	2	0	2	0	1	1	0	4	0	0	1	1
ENSMUSG00000101904	Gm29427	overlapping_locus	chr1	130670209	130715799	-	7	5	15	12	9	9	14	8	7	2	4	4	0	16	7	6	2	2	8
ENSMUSG00000100257	C4bp-ps1	overlapping_locus	chr1	130670261	130684071	-	14	5	3	0	3	4	4	1	6	9	1	6	1	1	4	3	0	1	3
ENSMUSG00000026409	Pfkfb2	overlapping_locus	chr1	130689182	130729253	-	1593	1494	1720	1870	626	981	1073	997	1088	992	654	739	738	1169	1516	1366	341	773	1260
ENSMUSG00000046404	Yod1		chr1	130717327	130724358	+	2696	2485	2904	2510	1486	1643	3130	3502	3791	2874	2204	3401	2436	1980	3120	2439	801	1634	2068
ENSMUSG00000104515	Gm37163	overlapping_locus	chr1	130727132	130728821	-	22	29	23	33	62	12	40	18	19	26	30	19	19	24	25	31	15	23	27
ENSMUSG00000042510	AA986860		chr1	130731976	130744622	+	2223	2474	2470	2676	881	1739	2544	3035	2473	2281	1767	2383	2092	2262	2472	2278	1040	1848	1958
ENSMUSG00000099556	Gm28857		chr1	130740162	130741327	-	34	25	32	33	23	24	49	52	45	45	36	42	42	52	48	39	19	34	42
ENSMUSG00000100106	Gm28856		chr1	130766384	130784433	+	74	76	74	92	11	50	50	63	82	47	25	52	44	90	106	74	17	61	79
ENSMUSG00000026415	Fcamr		chr1	130800902	130814740	+	148	133	119	203	48	134	189	100	123	155	89	101	125	128	199	166	26	119	159
ENSMUSG00000086706	Gm15848		chr1	130809977	130824084	-	89	86	83	99	55	79	99	90	82	65	72	72	87	86	117	89	42	55	67
ENSMUSG00000026417	Pigr		chr1	130826684	130852249	+	58	24	33	52	37	39	16	10	17	17	12	15	14	36	45	24	21	29	23
ENSMUSG00000042474	Fcmr		chr1	130865669	130880791	+	2	5	0	5	3	3	5	4	0	5	6	7	4	1	2	1	4	0	2
ENSMUSG00000026420	Il24		chr1	130882074	130887454	-	0	0	3	1	6	1	0	0	0	3	3	3	0	5	5	1	0	0	0
ENSMUSG00000026416	Il20		chr1	130906985	130911451	-	8	38	15	44	20	13	34	5	17	24	8	6	16	26	25	17	16	13	25
ENSMUSG00000016524	Il19		chr1	130932656	130940115	-	4	0	2	7	6	0	15	5	1	7	78	6	5	1	3	0	6	1	1
ENSMUSG00000016529	Il10		chr1	131019845	131024974	+	4	6	11	11	6	8	29	50	39	40	26	16	32	13	37	35	5	10	31
ENSMUSG00000016528	Mapkapk2	overlapping_locus	chr1	131053700	131097826	-	4790	4595	4604	5011	2500	3111	4630	4993	4821	4660	4389	3628	3680	3488	4855	4512	3399	3376	3565
ENSMUSG00000088705	Gm25549		chr1	131073658	131073751	-	0	0	2	1	1	1	1	0	0	1	0	2	0	0	0	0	0	1	1
ENSMUSG00000102856	Gm37084	overlapping_locus	chr1	131086252	131092149	-	10	6	10	11	9	8	7	11	4	14	4	4	6	8	18	14	1	5	6
ENSMUSG00000016526	Dyrk3		chr1	131127455	131138340	-	43	47	44	43	31	49	78	86	82	81	102	97	71	30	59	70	65	61	34
ENSMUSG00000026427	Eif2d		chr1	131153181	131187658	+	1352	1450	1390	1734	681	983	1449	1467	1358	1320	1070	1070	1037	1088	1389	1275	896	972	1173
ENSMUSG00000026430	Rassf5		chr1	131176410	131245258	-	2741	2502	2650	2836	840	1864	2016	2054	2054	1745	1539	2156	1692	2158	2628	2458	890	1477	1958
ENSMUSG00000101729	Gm17796	pseudo_consens	chr1	131216877	131218089	+	32	65	45	23	9	24	7	38	29	19	15	38	17	20	23	45	9	9	27
ENSMUSG00000042349	Ikbke		chr1	131254343	131279606	-	1296	1119	1263	1553	753	895	1652	1354	1228	1557	995	944	1095	1353	1609	1419	627	849	1373
ENSMUSG00000102027	Gm28914		chr1	131259507	131260553	+	3	2	3	8	8	2	5	3	3	0	7	4	1	5	11	1	5	3	5
ENSMUSG00000102055	Gm28913		chr1	131263330	131266749	+	25	28	13	35	13	15	22	24	18	14	4	9	23	39	45	24	7	12	32
ENSMUSG00000026425	Srgap2	overlapping_locus	chr1	131285251	131527352	-	6447	5556	6358	6496	2125	3990	3758	3582	3552	3164	2251	2802	2834	4414	5142	4852	1614	2941	4595
ENSMUSG00000102733	Gm38262	overlapping_locus	chr1	131341302	131342683	-	1	0	2	0	2	0	5	0	0	1	1	1	0	0	3	0	0	1	0
ENSMUSG00000104060	Gm37954	overlapping_locus	chr1	131376461	131378531	-	2	5	2	5	1	0	4	0	0	1	2	0	5	2	5	8	3	5	3
ENSMUSG00000101778	Gm29488	overlapping_locus	chr1	131406812	131409213	-	0	2	10	10	0	7	6	1	4	3	2	4	0	11	13	8	0	0	7
ENSMUSG00000099959	Gm29487	overlapping_locus	chr1	131447440	131447695	-	0	0	0	0	0	1	0	0	2	0	0	1	0	0	0	1	0	0	2
ENSMUSG00000076287	Gm24273		chr1	131498639	131498802	-	2	0	0	0	0	0	0	0	0	1	0	1	0	0	0	0	0	0	1
ENSMUSG00000055184	Fam72a		chr1	131527903	131539872	+	51	71	53	91	43	66	63	47	54	55	47	63	45	80	95	94	38	38	52
ENSMUSG00000095841	Gm8532	pseudo_consens	chr1	131632509	131632969	-	1	0	0	0	0	1	0	0	2	0	1	3	0	0	2	0	0	2	1
ENSMUSG00000004552	Ctse		chr1	131638306	131675505	+	10	1	9	16	6	8	451	269	355	326	299	269	214	5	15	16	5	24	13
ENSMUSG00000052688	Rab7b		chr1	131688695	131715439	+	3064	2643	2969	3336	1747	1639	2616	2624	2482	2380	1848	1537	2050	2011	2916	2573	1596	1707	2195
ENSMUSG00000042268	Slc26a9		chr1	131744022	131771504	+	335	419	327	368	162	346	915	972	995	767	917	835	573	316	465	426	144	341	269
ENSMUSG00000042251	Pm20d1		chr1	131797381	131821473	+	60	70	69	80	54	35	161	107	142	132	83	129	88	69	45	54	38	18	37
ENSMUSG00000013275	Slc41a1		chr1	131827493	131848865	+	2642	2554	2704	2674	1864	1614	2619	2789	2457	2348	2040	1985	1735	1984	2159	2228	1440	1706	1600
ENSMUSG00000026433	Rab29		chr1	131867224	131872887	+	349	387	351	432	218	279	471	379	364	426	365	305	287	314	377	373	209	286	384
ENSMUSG00000026434	Nucks1	overlapping_locus	chr1	131910534	131936321	+	2837	2717	2741	3010	3452	2138	3225	3242	2969	3161	3174	2369	2344	1991	2652	2505	2215	1870	1739
ENSMUSG00000103569	Gm38067	overlapping_locus	chr1	131914529	131916439	+	2	1	5	5	3	5	1	4	0	4	8	2	0	5	5	5	1	3	5
ENSMUSG00000026435	Slc45a3	overlapping_locus	chr1	131962967	131982969	+	628	473	605	800	274	388	601	542	628	552	409	414	395	481	608	505	316	469	641
ENSMUSG00000026436	Elk4	overlapping_locus	chr1	132007607	132032612	+	2995	3054	2997	3076	1951	1956	2730	2527	2807	2548	2243	2035	1862	2131	2827	2705	1842	1879	2073
ENSMUSG00000059149	Mfsd4a		chr1	132022806	132068062	-	1409	1224	1402	1495	524	816	1104	1041	1276	1160	850	875	764	889	1267	1252	494	801	895
ENSMUSG00000103966	Gm37120		chr1	132102365	132108323	+	1	0	3	4	0	5	4	8	3	4	2	2	1	7	2	1	4	1	2
ENSMUSG00000026437	Cdk18		chr1	132112237	132139684	-	99	107	113	155	55	71	134	114	107	91	105	115	94	72	122	119	97	97	107
ENSMUSG00000079330	Lemd1	ncRNA_host	chr1	132191431	132259227	+	2	0	0	1	2	1	0	1	1	1	2	2	0	0	0	0	2	0	3
ENSMUSG00000118219	Gm29695	overlapping_locus	chr1	132191457	132209546	+	14	2	4	13	7	11	2	9	7	8	0	2	5	8	2	10	5	2	2
ENSMUSG00000089808	Gm7241	pseudo_consens	chr1	132284453	132284809	+	0	0	0	0	1	1	0	0	1	0	0	1	0	1	0	0	0	0	0
ENSMUSG00000042115	Klhdc8a		chr1	132298626	132307357	+	77	84	48	66	31	50	143	140	117	143	103	97	83	32	78	62	46	44	51
ENSMUSG00000009772	Nuak2		chr1	132316126	132333488	+	1182	1089	1229	1216	438	518	1142	1070	1102	952	760	814	889	748	1004	938	498	613	708
ENSMUSG00000100658	F730311O21Rik		chr1	132342023	132349626	+	44	22	29	45	9	34	60	64	29	45	30	30	35	50	67	39	12	34	53
ENSMUSG00000042066	Tmcc2		chr1	132356315	132391281	-	740	569	653	846	424	407	417	390	471	400	312	254	276	431	568	579	464	419	553
ENSMUSG00000090079	Gm15849		chr1	132381129	132382509	+	0	0	0	1	3	0	0	0	0	0	0	0	0	0	1	0	0	0	0
ENSMUSG00000042046	Dstyk		chr1	132417555	132466958	+	3053	2747	3278	3441	1522	1946	2431	2276	2657	2332	1716	1796	1716	2199	2883	2581	1340	1587	2133
ENSMUSG00000097760	6030442K20Rik		chr1	132466433	132477064	-	29	60	42	35	29	34	29	29	29	10	25	16	18	28	84	26	13	25	26
ENSMUSG00000026439	Rbbp5		chr1	132477365	132505659	+	1462	1367	1331	1522	609	954	1283	1189	1225	1258	960	970	810	1159	1352	1118	590	848	1028
ENSMUSG00000048174	Tmem81		chr1	132506230	132508639	+	276	316	237	293	191	181	246	218	174	204	130	132	149	209	320	199	127	153	230
ENSMUSG00000053024	Cntn2		chr1	132509427	132543256	-	7	10	9	12	8	2	18	12	18	28	39	33	11	7	7	12	4	5	7
ENSMUSG00000026442	Nfasc		chr1	132564690	132741797	-	340	297	399	407	156	182	288	212	166	304	143	133	132	205	277	215	142	166	206
ENSMUSG00000088911	Gm22609		chr1	132814228	132814348	-	0	0	0	0	0	0	0	0	1	0	0	1	0	0	0	0	0	0	0
ENSMUSG00000026443	Lrrn2		chr1	132880273	132940005	+	72	63	77	72	20	66	50	25	51	52	35	30	35	37	55	56	59	36	33
ENSMUSG00000106377	Gm44300		chr1	132923624	132923744	-	0	0	0	0	0	0	0	0	0	1	0	1	0	0	0	1	0	0	0
ENSMUSG00000102709	Gm38308		chr1	132943512	132945320	-	1	0	0	4	0	6	1	1	0	0	0	0	0	0	2	0	0	2	0
ENSMUSG00000054387	Mdm4		chr1	132959484	133030561	-	7372	6304	8387	8942	3675	4920	6115	5547	5166	6032	3986	4322	4119	6096	7181	6415	1887	3953	7382
ENSMUSG00000100228	Gm29257	pseudo_consens	chr1	133025801	133026439	+	13	11	9	7	10	8	18	6	11	11	6	14	19	6	5	23	6	14	17
ENSMUSG00000026447	Pik3c2b		chr1	133045667	133108687	+	765	711	794	1132	455	617	989	862	942	817	535	641	543	832	894	825	409	479	628
ENSMUSG00000101102	Gm28609		chr1	133050128	133068405	-	13	4	3	5	18	7	5	4	0	2	6	4	1	5	10	3	5	5	2
ENSMUSG00000102425	Gm26616		chr1	133128676	133131782	-	13	12	14	23	12	16	15	14	31	7	16	18	13	19	23	26	11	17	12
ENSMUSG00000046062	Ppp1r15b		chr1	133131143	133139783	+	2380	2240	2641	2897	1255	1724	2522	2485	2284	2394	2286	2037	1717	1872	2360	2455	1356	1898	1859
ENSMUSG00000041757	Plekha6		chr1	133164210	133303435	+	2918	3033	3506	3743	1034	1787	2392	2118	2114	2254	1510	1606	1485	2409	2760	2577	1062	1530	2278
ENSMUSG00000101693	Gm19461		chr1	133250398	133269808	-	10	11	11	9	6	8	6	6	1	3	4	2	6	10	10	16	4	3	2
ENSMUSG00000070644	Etnk2		chr1	133363572	133380336	+	215	153	158	177	163	127	69	76	80	92	65	49	64	98	187	144	173	121	80
ENSMUSG00000070643	Sox13		chr1	133382303	133424377	-	607	543	502	699	282	381	810	692	746	643	596	622	501	515	587	379	405	403	403
ENSMUSG00000064814	Gm23939		chr1	133601223	133601355	+	0	0	0	3	0	0	0	0	0	0	0	0	0	0	0	0	0	0	1
ENSMUSG00000090553	Snrpe		chr1	133603871	133610291	-	871	1064	902	967	721	653	1236	1013	1149	1217	1269	885	887	672	935	842	606	641	847
ENSMUSG00000102976	Zc3h11a	overlapping_locus	chr1	133619862	133661380	-	669	519	646	776	189	396	504	567	557	514	359	413	378	580	679	555	130	376	558
ENSMUSG00000094410	Gm38394	overlapping_locus	chr1	133619940	133661318	-	1775	1201	2148	2193	402	1088	1822	1580	1663	1494	1030	1202	935	1354	2084	1500	292	934	1546
ENSMUSG00000051998	Lax1		chr1	133679091	133690108	-	121	74	84	113	68	67	75	76	64	70	70	62	66	81	88	88	43	45	101
ENSMUSG00000026463	Atp2b4	overlapping_locus	chr1	133699457	133801041	-	14735	12393	15197	15424	5984	9490	9288	9609	9198	7748	4775	6562	6636	11141	11572	11215	4845	6753	9266
ENSMUSG00000098606	Mir6903		chr1	133726558	133726645	-	0	0	0	0	0	0	0	0	2	0	0	0	0	0	2	0	0	0	1
ENSMUSG00000102509	Gm37368	overlapping_locus	chr1	133775210	133778421	-	10	13	5	10	41	9	2	5	0	5	1	4	4	4	13	7	15	1	8
ENSMUSG00000100830	Gm28441		chr1	133835189	133838372	+	3	9	4	1	0	1	2	0	0	0	0	0	0	0	3	7	0	1	2
ENSMUSG00000010311	Optc		chr1	133897199	133907999	-	188	170	248	359	79	104	150	77	112	93	17	45	62	236	234	167	33	76	265
ENSMUSG00000090208	Gm15851		chr1	133906531	133914822	+	7	13	9	7	7	10	2	2	2	0	4	6	1	8	3	9	27	10	6
ENSMUSG00000041577	Prelp		chr1	133910304	133921414	-	10753	7387	11736	10014	3308	5105	4426	4617	4909	4530	3253	2431	4025	6658	7498	7516	5823	5661	7666
ENSMUSG00000100987	Gm1627		chr1	133962162	133971938	+	0	1	0	0	0	2	5	5	2	0	1	1	0	0	0	0	0	2	2
ENSMUSG00000041559	Fmod		chr1	134037254	134048277	+	17679	14154	16211	18249	9552	11062	6966	6935	8713	7312	5600	4750	6731	10720	11462	12605	13790	10610	8549
ENSMUSG00000020423	Btg2		chr1	134075170	134079120	-	2357	2105	2243	2802	969	1694	3109	2688	3013	2456	1975	2278	1882	2254	2729	2165	1287	1703	2097
ENSMUSG00000102380	Gm38140		chr1	134096405	134099159	-	0	4	0	1	0	1	6	4	0	0	3	2	2	1	2	0	1	2	3
ENSMUSG00000073559	Gm8618		chr1	134109368	134109799	+	4	0	7	1	2	6	1	1	7	2	4	7	5	1	1	6	2	2	1
ENSMUSG00000026450	Chit1		chr1	134111242	134151540	+	5090	6350	5152	5658	2438	3590	14443	14824	11534	10519	9876	10600	9226	6295	8978	6581	4491	5696	4138
ENSMUSG00000064246	Chil1		chr1	134182176	134190181	+	836	855	1060	1058	839	733	12869	13650	9222	10839	11276	10133	7604	2707	5193	2747	3222	3531	1448
ENSMUSG00000042451	Mybph		chr1	134193448	134201232	+	93	114	98	80	60	45	198	219	164	168	65	86	242	114	143	251	45	120	122
ENSMUSG00000042429	Adora1		chr1	134199223	134235431	-	272	228	298	354	228	237	96	77	93	79	50	63	94	122	189	132	239	146	261
ENSMUSG00000026459	Myog		chr1	134289989	134292548	+	46	20	24	20	37	20	9	1	19	16	7	8	9	21	18	22	19	17	15
ENSMUSG00000026458	Ppfia4		chr1	134296783	134332928	-	1045	1039	1342	1446	459	593	342	225	318	353	208	205	221	717	969	877	343	445	800
ENSMUSG00000042305	Tmem183a		chr1	134346097	134361979	-	2658	2793	2849	3225	1347	1751	2647	2308	2550	2466	2103	1870	1796	1953	2570	2424	1362	1688	2220
ENSMUSG00000050526	Mgat4f		chr1	134385940	134390981	+	1	1	3	1	6	1	1	6	6	1	3	1	3	3	5	4	3	2	1
ENSMUSG00000026456	Cyb5r1		chr1	134405559	134411740	+	1382	1375	1459	1515	1035	988	1301	1201	1089	1309	1013	853	886	1045	1259	1222	801	898	1249
ENSMUSG00000026457	Adipor1		chr1	134415378	134433351	+	8894	9049	8943	9717	3998	6301	7869	7176	8000	6895	6188	6634	5831	6755	8394	7774	5297	6053	6753
ENSMUSG00000101061	Platr1		chr1	134435628	134439597	+	0	0	2	0	1	0	0	0	2	0	3	1	0	0	0	0	0	1	0
ENSMUSG00000102722	Gm37935		chr1	134454492	134455473	-	2	0	4	9	8	1	5	0	0	17	2	2	2	8	7	0	1	3	8
ENSMUSG00000026455	Klhl12		chr1	134455531	134491018	+	1363	1324	1346	1530	751	933	1108	1051	1041	1047	869	894	803	867	1208	1093	543	794	963
ENSMUSG00000042229	Rabif	ncRNA_host	chr1	134494648	134508774	+	1168	1098	1173	1265	522	805	1208	1273	969	1016	979	952	856	842	1168	872	659	829	894
ENSMUSG00000077202	Gm25612		chr1	134505338	134505463	+	4	10	8	19	1	4	2	9	4	5	4	9	5	8	10	14	3	5	4
ENSMUSG00000096712	Gm15454		chr1	134518081	134518563	+	0	2	3	8	4	2	5	1	17	2	4	4	1	0	3	1	1	5	1
ENSMUSG00000101955	Gm29376		chr1	134519978	134524139	+	7	0	5	7	1	4	0	8	2	2	5	2	5	11	1	3	3	2	1
ENSMUSG00000046367	Mgat4e		chr1	134540941	134549682	-	0	0	1	0	0	2	6	0	3	0	0	0	1	0	0	4	2	1	4
ENSMUSG00000042207	Kdm5b		chr1	134560171	134635285	+	3077	2770	3002	3020	1223	1968	3915	3656	3340	2831	2443	2657	2450	2944	2963	2712	1355	1818	2069
ENSMUSG00000026452	Syt2		chr1	134646677	134762593	+	18	24	22	21	17	8	16	17	34	23	12	8	12	16	21	27	10	17	15
ENSMUSG00000073557	Ppp1r12b	overlapping_locus	chr1	134754658	134955942	-	3960	2893	3606	3108	2329	2084	1651	1783	1922	1717	1259	1163	1495	2057	2272	2719	1659	1722	1857
ENSMUSG00000103614	Gm37949	overlapping_locus	chr1	134799895	134801985	-	5	1	6	14	1	5	0	0	0	5	4	1	1	5	11	4	1	1	1
ENSMUSG00000077846	Gm22232		chr1	134809275	134809368	+	0	0	0	0	0	0	0	0	0	0	0	0	0	0	0	1	1	0	0
ENSMUSG00000103976	Gm37677	overlapping_locus	chr1	134819916	134827549	-	19	1	12	20	29	7	5	24	7	16	12	5	7	21	9	7	10	18	5
ENSMUSG00000101168	Gm28892		chr1	134834142	134846415	+	0	0	0	1	1	0	2	5	5	0	3	3	1	0	4	0	0	0	0
ENSMUSG00000026429	Ube2t		chr1	134962565	134974162	+	152	140	157	195	100	107	214	162	158	173	148	99	102	132	171	106	96	103	87
ENSMUSG00000042793	Lgr6		chr1	134983301	135105276	-	4250	3935	3840	4406	1707	2460	2358	2192	2162	2575	1389	1489	1719	3110	3690	3029	2173	2149	2847
ENSMUSG00000097993	Ptprv		chr1	135108497	135132594	-	202	262	180	432	130	187	404	296	358	289	198	337	185	241	298	208	91	97	184
ENSMUSG00000097988	Gm10535		chr1	135108961	135113378	+	4	9	7	12	5	5	1	5	5	4	2	5	7	6	4	3	1	0	11
ENSMUSG00000031506	Ptpn7		chr1	135132700	135145317	+	339	316	414	428	163	190	365	371	272	297	298	199	228	320	368	303	198	213	335
ENSMUSG00000026426	Arl8a	overlapping_locus	chr1	135146824	135156269	+	1939	1773	1855	2142	996	1239	1478	1251	1373	1398	1153	1056	1147	1370	1733	1598	1172	1364	1741
ENSMUSG00000087721	Gm26280		chr1	135150666	135150766	-	23	6	43	15	13	11	29	6	12	15	10	13	15	11	48	36	4	11	24
ENSMUSG00000085311	Gm15445	overlapping_locus	chr1	135152963	135153806	+	24	31	37	28	36	25	33	13	41	31	33	27	18	43	26	29	17	19	29
ENSMUSG00000026424	Gpr37l1		chr1	135160234	135167681	-	95	75	86	101	86	81	44	60	31	43	45	28	33	48	47	99	103	40	44
ENSMUSG00000079139	Gm4204	pseudo_consens	chr1	135231995	135233225	+	46	61	48	52	23	31	70	81	59	70	75	49	56	35	25	46	23	52	50
ENSMUSG00000097680	Gm26642		chr1	135248561	135266443	+	122	140	152	95	81	77	112	112	96	140	85	83	98	129	96	101	46	63	109
ENSMUSG00000003051	Elf3		chr1	135253575	135258568	-	23	24	41	45	53	23	180	145	103	145	204	112	78	25	71	39	66	39	24
ENSMUSG00000041926	Rnpep		chr1	135262712	135284084	-	1397	1244	1347	1558	1014	895	2233	1930	1747	2278	1960	1344	1420	1343	1493	1515	917	950	1306
ENSMUSG00000062580	Timm17a		chr1	135295213	135313778	-	1394	1444	1410	1414	1216	961	1190	1427	1279	1307	1400	1058	1021	878	1219	1293	1020	938	983
ENSMUSG00000048096	Lmod1		chr1	135324807	135368065	+	272	192	266	238	270	162	99	138	125	111	88	107	129	108	125	174	197	151	141
ENSMUSG00000041889	Shisa4		chr1	135371057	135375237	-	531	520	484	396	709	310	208	265	242	321	146	144	251	304	296	497	362	323	251
ENSMUSG00000041879	Ipo9	overlapping_locus	chr1	135382312	135430499	-	2355	2332	2374	2760	1324	1633	2100	2041	2162	2196	1821	1471	1487	1712	2099	2049	1208	1462	1682
ENSMUSG00000100620	Gm28277	overlapping_locus	chr1	135409622	135414186	-	0	0	0	0	0	1	0	1	0	0	0	0	1	0	0	0	0	0	0
ENSMUSG00000009418	Nav1	overlapping_locus	chr1	135434580	135688105	-	4366	3718	5173	5326	2830	3485	2789	2675	3149	2654	1970	2104	2117	2687	4408	3681	2307	2528	3572
ENSMUSG00000102474	2610012C04Rik	overlapping_locus	chr1	135480392	135481414	-	0	0	7	0	4	3	0	0	0	11	1	1	4	0	1	2	1	2	1
ENSMUSG00000104524	Gm37333	overlapping_locus	chr1	135523088	135525338	-	17	9	5	13	62	9	7	8	7	15	12	14	12	31	10	8	38	7	11
ENSMUSG00000054412	Gm4793		chr1	135584773	135599948	+	15	7	37	2	8	12	9	6	7	18	5	9	8	7	18	13	9	9	14
ENSMUSG00000026421	Csrp1		chr1	135720061	135752232	+	9063	7935	7766	9547	6304	5383	6373	5970	6118	6051	5366	4500	4800	5871	6824	6770	7999	5703	5931
ENSMUSG00000041801	Phlda3		chr1	135766119	135769136	+	3306	2894	2499	2997	2041	1952	2642	2806	2268	2295	2106	1864	1867	2264	2676	2265	2454	1846	2042
ENSMUSG00000026418	Tnni1		chr1	135779434	135810989	+	707	431	414	484	727	311	168	207	315	202	146	169	211	295	273	553	525	405	246
ENSMUSG00000041782	Lad1		chr1	135818598	135833342	+	8730	8798	7749	8316	2544	5661	9764	10939	9870	7984	8505	8063	7197	6578	8457	7571	4584	5818	4894
ENSMUSG00000026414	Tnnt2		chr1	135836354	135852260	+	1214	1297	908	1331	647	805	261	295	382	284	232	337	262	706	692	721	392	500	668
ENSMUSG00000101482	Gm28883	pseudo_consens	chr1	135869782	135870150	+	0	0	0	0	0	3	1	0	1	0	1	0	0	0	0	0	0	1	2
ENSMUSG00000026413	Pkp1	overlapping_locus	chr1	135871395	135919207	-	59391	62098	52314	55122	18258	40156	65821	72711	70396	53700	55517	58040	49408	44308	54523	55214	23368	36050	30819
ENSMUSG00000102414	Gm36938	overlapping_locus	chr1	135896394	135899089	-	38	16	50	71	2	17	43	52	66	55	25	38	20	27	41	18	8	18	37
ENSMUSG00000051985	Igfn1		chr1	135953578	136006342	-	99	124	164	46	182	45	18	7	19	39	34	31	20	38	61	41	34	52	25
ENSMUSG00000026411	Tmem9		chr1	136008150	136035342	+	827	921	956	1166	538	586	824	653	744	745	698	609	537	631	719	822	705	551	720
ENSMUSG00000026407	Cacna1s	overlapping_locus	chr1	136052750	136119822	+	2483	1526	1942	1081	1972	1171	696	897	945	851	442	489	971	937	1104	1542	1116	1271	792
ENSMUSG00000102838	Gm37014	overlapping_locus	chr1	136057181	136059433	+	0	0	1	0	0	1	0	0	0	0	0	0	0	0	0	0	0	0	0
ENSMUSG00000102717	Gm37759		chr1	136116577	136119822	-	9	8	5	2	7	1	10	5	1	4	1	0	3	2	23	5	0	0	4
ENSMUSG00000086264	Gm15850		chr1	136126178	136131183	-	0	0	4	1	0	1	0	0	0	10	0	0	0	0	0	2	0	1	0
ENSMUSG00000041642	Kif21b		chr1	136131389	136177998	+	447	307	392	585	157	305	507	455	490	511	392	466	318	281	375	452	204	242	347
ENSMUSG00000087230	Mroh3		chr1	136181652	136212828	-	31	37	26	54	34	30	89	92	73	88	47	86	82	39	48	39	15	40	75
ENSMUSG00000041605	Inava		chr1	136213531	136234264	-	1458	1564	1444	1636	497	980	1700	1781	1616	1546	1333	1457	1172	1141	1521	1239	764	979	1019
ENSMUSG00000097433	Gm26781		chr1	136259407	136274406	+	4	9	5	11	5	10	2	3	8	4	7	8	0	6	14	14	0	4	8
ENSMUSG00000052759	Gpr25		chr1	136259797	136260873	-	5	2	6	2	0	1	0	0	0	0	0	0	0	0	0	0	0	1	0
ENSMUSG00000041570	Camsap2		chr1	136268123	136346104	-	3364	2725	3271	3416	1249	2252	2762	3130	3048	2931	2402	2603	2152	2555	2846	2735	968	2072	2092
ENSMUSG00000097403	9230116N13Rik		chr1	136411916	136415519	-	99	106	141	171	57	74	90	66	61	64	62	62	54	99	119	99	48	94	73
ENSMUSG00000026404	Ddx59		chr1	136415271	136440158	+	346	411	352	385	218	313	449	361	374	372	338	328	246	280	360	371	197	265	261
ENSMUSG00000041498	Kif14	overlapping_locus	chr1	136466343	136531511	+	131	172	159	220	103	151	437	375	454	423	450	361	252	123	143	167	127	158	83
ENSMUSG00000099337	Gm29486	overlapping_locus	chr1	136507409	136507780	+	0	1	0	0	1	0	0	0	0	2	2	0	1	0	4	0	5	0	0
ENSMUSG00000101413	Gm29485	overlapping_locus	chr1	136523884	136524165	+	0	0	0	0	1	0	0	0	3	0	0	0	0	0	0	0	0	0	0
ENSMUSG00000104509	Gm33994		chr1	136576938	136579477	-	0	0	0	1	0	0	0	0	0	0	1	1	0	0	0	1	0	0	0
ENSMUSG00000104366	4933409D19Rik		chr1	136603033	136605468	-	1	0	0	0	0	1	0	0	0	0	0	0	0	2	0	0	0	0	0
ENSMUSG00000097229	Platr23		chr1	136622098	136624650	-	3	3	4	0	0	2	0	0	0	0	2	0	0	0	0	0	0	0	0
ENSMUSG00000041483	Zfp281		chr1	136624901	136630053	+	686	631	712	669	393	426	547	461	459	506	361	336	360	405	687	537	274	411	454
ENSMUSG00000097113	Gm19705		chr1	136670769	136690804	+	25	9	22	13	18	7	4	3	7	9	8	6	13	13	14	13	4	6	6
ENSMUSG00000097448	Platr22	ncRNA_host	chr1	136696211	136726142	+	33	29	41	23	12	15	13	14	18	14	6	7	7	25	35	17	19	14	13
ENSMUSG00000092912	Gm24086		chr1	136697374	136697471	+	0	2	0	0	2	0	0	0	1	0	0	0	0	0	0	0	3	0	0
ENSMUSG00000104360	Gm8762	pseudo_consens	chr1	136789182	136789520	-	1	5	0	7	0	2	2	0	1	0	3	1	0	1	6	0	4	1	0
ENSMUSG00000026398	Nr5a2		chr1	136842571	136960448	-	53	23	37	54	13	25	41	14	17	25	16	20	18	35	23	57	17	20	33
ENSMUSG00000098243	Gm4258	overlapping_locus	chr1	137898595	138000384	+	2	5	0	6	2	0	4	1	2	5	1	3	5	0	1	0	0	1	2
ENSMUSG00000104118	Gm37298	overlapping_locus	chr1	137909291	137913158	+	1	0	2	5	1	1	1	3	5	7	2	1	1	1	0	0	0	2	1
ENSMUSG00000098045	Gm26979		chr1	137917690	137921312	-	0	0	0	5	0	0	2	0	0	0	0	1	0	0	0	0	0	0	2
ENSMUSG00000103038	Gm37124	overlapping_locus	chr1	137924388	137926379	+	12	2	7	7	21	5	2	10	0	1	5	0	1	3	5	2	11	3	5
ENSMUSG00000102277	A130050O07Rik	overlapping_locus	chr1	137927251	137930273	+	7	1	7	9	13	4	10	1	2	0	4	5	6	11	1	5	6	2	7
ENSMUSG00000102142	Gm26930	overlapping_locus	chr1	137932041	137933284	+	1	6	0	3	1	2	2	3	5	1	3	1	1	1	0	0	0	6	7
ENSMUSG00000104145	D130019J16Rik	overlapping_locus	chr1	137935189	137937346	+	14	20	10	18	58	13	11	6	9	19	14	5	7	10	27	4	43	9	11
ENSMUSG00000103427	Gm37534	overlapping_locus	chr1	137949422	137954643	+	4	4	8	6	5	1	9	3	2	4	3	1	6	5	4	4	1	2	7
ENSMUSG00000098206	Mir181a-1hg	overlapping_locus	chr1	137966531	137969918	+	41	65	58	85	55	30	26	42	67	40	33	21	30	46	46	47	22	26	43
ENSMUSG00000104197	Gm37632	overlapping_locus	chr1	137971174	137972315	+	5	15	7	7	11	5	4	7	3	6	2	5	5	10	7	6	2	1	7
ENSMUSG00000026395	Ptprc	overlapping_locus	chr1	138062861	138175708	-	1606	1334	1816	2331	517	918	1717	1489	1279	1847	1384	1004	1182	1786	1905	2148	388	1127	1892
ENSMUSG00000104291	A130071D04Rik	overlapping_locus	chr1	138161820	138167683	-	30	36	26	10	77	6	33	13	4	34	55	29	23	22	23	19	16	10	22
ENSMUSG00000026393	Nek7	overlapping_locus	chr1	138482875	138620141	-	4615	4094	4750	5155	2043	2896	3124	2822	3225	2952	2256	2276	2306	3032	3683	3637	1254	2567	3120
ENSMUSG00000099510	Gm28501		chr1	138515615	138550009	+	0	0	0	4	0	0	0	0	0	0	0	1	0	0	0	0	0	0	0
ENSMUSG00000102651	Gm37080	overlapping_locus	chr1	138552305	138554708	-	0	1	0	0	4	0	0	0	0	0	0	0	0	0	0	3	0	2	0
ENSMUSG00000102448	Gm37101	overlapping_locus	chr1	138567697	138571356	-	11	10	8	11	34	3	4	15	0	3	8	5	5	2	5	0	21	2	1
ENSMUSG00000100459	Gm5833		chr1	138640095	138682077	-	3	2	4	0	0	2	11	14	4	0	0	0	0	0	6	6	2	3	0
ENSMUSG00000019230	Lhx9		chr1	138825186	138848577	-	0	4	1	2	1	6	0	0	1	1	0	1	0	3	3	2	0	1	1
ENSMUSG00000079283	2310009B15Rik		chr1	138851983	138856852	-	236	239	224	328	128	141	260	186	164	239	183	128	132	171	235	269	168	145	196
ENSMUSG00000102365	Gm37045		chr1	138960441	138962903	-	19	10	8	5	10	16	29	6	29	5	9	19	17	17	18	15	6	6	13
ENSMUSG00000056268	Dennd1b	overlapping_locus	chr1	138963435	139178960	+	1273	1184	1304	1346	619	746	971	1145	1259	1039	801	1027	836	918	1114	1055	272	655	911
ENSMUSG00000104436	Gm37423	overlapping_locus	chr1	138968510	138971851	+	6	0	2	4	52	3	3	5	13	4	9	3	6	9	7	12	17	4	3
ENSMUSG00000104900	4930596I21Rik	overlapping_locus	chr1	138977656	138979246	+	1	0	9	4	5	4	2	1	4	2	5	5	5	1	5	3	2	1	2
ENSMUSG00000102626	Gm18553	pseudo_consens	chr1	138983864	138984497	-	0	0	5	0	3	0	4	2	0	2	0	2	1	0	0	0	0	1	0
ENSMUSG00000085361	Gm16305	pseudo_consens	chr1	138991514	138992069	-	0	0	0	1	2	0	2	1	0	0	0	3	2	0	2	0	0	0	2
ENSMUSG00000102157	Gm37470	overlapping_locus	chr1	139030185	139032982	+	0	0	0	3	0	0	8	1	0	0	1	4	0	2	0	0	0	0	2
ENSMUSG00000105936	Gm43544	overlapping_locus	chr1	139070213	139072684	+	15	9	6	18	53	2	8	8	18	9	21	16	20	9	15	6	26	5	9
ENSMUSG00000102451	Gm37655		chr1	139082862	139086984	-	4	0	0	0	2	1	2	5	1	0	0	1	0	0	0	2	0	1	3
ENSMUSG00000102243	Gm37718	overlapping_locus	chr1	139155152	139157782	+	7	8	8	12	54	10	5	9	6	13	12	8	6	5	15	2	17	4	4
ENSMUSG00000063681	Crb1		chr1	139197056	139377100	-	0	0	0	2	0	1	0	1	2	0	0	1	0	0	0	5	0	0	0
ENSMUSG00000103844	4933436E23Rik		chr1	139379452	139402852	+	4	0	2	0	1	2	0	0	0	0	0	0	0	1	2	5	0	1	0
ENSMUSG00000033964	Zbtb41		chr1	139422288	139453005	+	1060	1006	1352	1271	526	743	1046	1033	1082	927	929	875	703	834	1015	860	337	739	761
ENSMUSG00000033952	Aspm		chr1	139454772	139494091	+	387	362	536	581	246	306	1161	869	967	1092	969	869	581	412	370	324	262	412	246
ENSMUSG00000033898	Cfhr2		chr1	139804167	139858718	-	0	0	0	0	0	1	0	0	0	0	0	0	0	0	0	3	0	0	0
ENSMUSG00000089991	Gm16332	overlapping_locus	chr1	139862957	139936477	-	4	1	2	3	0	4	2	9	0	7	2	4	3	0	1	2	0	1	5
ENSMUSG00000104496	Gm5837	overlapping_locus	chr1	139928240	139929608	-	5	13	5	15	5	6	4	11	13	7	5	6	5	3	3	8	8	6	2
ENSMUSG00000085867	Gm5834		chr1	139939601	139994205	-	2	0	0	0	1	0	0	2	0	2	0	1	2	1	0	0	2	0	1
ENSMUSG00000026365	Cfh		chr1	140084708	140183764	-	836	620	1098	902	268	476	714	612	763	849	581	451	695	634	840	902	165	708	930
ENSMUSG00000052726	Kcnt2	overlapping_locus	chr1	140246158	140612067	+	47	82	50	68	26	44	45	32	62	51	22	43	38	26	55	29	24	39	43
ENSMUSG00000102698	Gm37777	overlapping_locus	chr1	140266487	140269852	+	1	3	1	6	4	1	0	0	4	0	0	0	0	0	0	0	0	0	0
ENSMUSG00000102368	4930590L20Rik		chr1	140570176	140656404	-	0	0	1	1	0	1	0	0	0	0	0	0	1	0	0	0	0	0	0
ENSMUSG00000102740	Gm37599		chr1	141356789	141357277	+	0	1	0	0	0	0	0	0	0	0	0	0	1	0	0	0	0	0	0
ENSMUSG00000101795	Gm5835	pseudo_consens	chr1	143093347	143094616	-	32	11	30	22	18	23	18	42	30	22	37	22	42	13	15	37	12	28	36
ENSMUSG00000026361	Cdc73		chr1	143598800	143702893	-	1779	1560	1864	1905	904	1143	1400	1658	1532	1493	1237	1229	1147	1400	1733	1368	556	1083	1405
ENSMUSG00000033849	B3galt2		chr1	143640664	143654614	+	408	444	578	539	272	350	200	128	165	158	107	147	170	293	235	426	99	277	478
ENSMUSG00000089640	Gm6397	pseudo_consens	chr1	143683230	143684298	+	2	1	1	0	0	1	1	3	1	0	3	1	3	0	0	2	1	1	3
ENSMUSG00000018196	Glrx2		chr1	143716338	143749676	+	1457	1543	1530	1569	841	1087	1262	1150	1259	1152	1030	1078	980	1043	1223	1230	650	879	1236
ENSMUSG00000018199	Ro60		chr1	143750790	143777068	-	1586	1549	1886	1917	797	1091	1574	1503	1412	1444	1006	1203	1035	1415	1670	1438	601	1031	1189
ENSMUSG00000018189	Uchl5	overlapping_locus	chr1	143777272	143807466	+	1287	1161	1105	1242	793	830	1373	1513	1337	1253	1378	1322	1049	956	1185	1137	569	783	864
ENSMUSG00000100455	Gm29170	overlapping_locus	chr1	143777642	143781307	+	70	72	95	86	73	52	57	87	61	68	61	71	78	65	59	68	42	67	46
ENSMUSG00000026360	Rgs2		chr1	143999338	144004161	-	719	723	799	905	403	422	705	518	684	639	563	435	497	613	739	679	326	480	790
ENSMUSG00000051079	Rgs13		chr1	144138654	144177372	-	6	13	2	9	1	16	8	4	3	6	6	11	8	2	10	2	3	2	6
ENSMUSG00000100389	Rbm6-ps2		chr1	144221979	144223650	-	0	0	0	0	0	0	0	0	0	0	0	0	0	0	1	0	0	0	3
ENSMUSG00000026358	Rgs1		chr1	144242296	144249242	-	60	49	79	98	26	43	93	104	142	100	84	59	68	63	118	103	15	49	87
ENSMUSG00000100441	Gm7266	pseudo_consens	chr1	144312032	144312436	-	1	1	0	0	2	2	0	2	0	0	1	2	1	0	0	1	2	2	2
ENSMUSG00000026357	Rgs18		chr1	144752683	144775435	-	253	237	292	307	76	129	185	114	213	203	115	92	141	225	224	256	50	125	324
ENSMUSG00000097130	Gm5262	pseudo_consens	chr1	145183894	145184889	+	0	0	0	1	0	0	0	1	0	0	0	0	1	1	0	0	1	0	0
ENSMUSG00000090323	Gm5263	pseudo_consens	chr1	146420436	146421036	+	0	0	0	0	0	0	0	0	0	0	1	0	1	0	0	1	0	0	0
ENSMUSG00000035131	Brinp3	overlapping_locus	chr1	146494760	146902472	+	0	0	0	0	0	0	0	0	0	0	0	1	0	0	1	0	0	0	1
ENSMUSG00000087627	A230059L01Rik		chr1	146802965	146807340	-	1	9	4	3	0	1	0	0	1	4	2	0	3	2	0	5	0	2	5
ENSMUSG00000056220	Pla2g4a		chr1	149829618	149961290	-	1156	1388	1271	1072	473	968	788	896	935	766	741	654	710	875	901	1049	371	717	604
ENSMUSG00000077516	n-R5s219		chr1	149841530	149841661	+	0	0	0	0	1	0	0	0	1	0	0	0	0	0	1	0	0	0	0
ENSMUSG00000097028	Ptgs2os		chr1	150074873	150099963	-	2	7	0	3	5	3	1	8	6	5	2	5	2	3	2	2	0	4	4
ENSMUSG00000032487	Ptgs2		chr1	150100031	150108227	+	81	76	37	29	32	34	55	69	141	57	108	115	54	40	41	77	27	94	23
ENSMUSG00000101199	Gm9687	pseudo_consens	chr1	150145968	150146569	+	0	0	2	0	2	0	0	4	0	0	0	0	0	0	0	0	1	4	1
ENSMUSG00000097754	Ptgs2os2		chr1	150159043	150164948	-	0	0	8	4	5	2	4	6	4	10	2	1	3	2	6	3	1	3	5
ENSMUSG00000099875	Rbm3-ps		chr1	150265535	150265999	-	67	44	34	44	33	28	48	63	54	75	71	51	41	24	63	31	20	29	35
ENSMUSG00000006007	Pdc	overlapping_locus	chr1	150319417	150333906	+	3	1	2	2	4	1	3	8	2	0	2	1	2	10	10	1	1	9	3
ENSMUSG00000099447	2310030A07Rik		chr1	150320681	150346771	-	0	0	2	0	0	0	0	0	0	0	1	0	0	0	0	0	0	0	0
ENSMUSG00000102990	Gm37764	overlapping_locus	chr1	150324538	150326687	+	0	0	0	3	0	1	0	0	0	0	0	0	0	1	0	0	0	0	0
ENSMUSG00000006010	Odr4		chr1	150361305	150393080	-	1552	1368	1647	1713	771	1046	1191	1112	1132	1104	795	953	920	1122	1444	1141	485	891	1226
ENSMUSG00000006005	Tpr		chr1	150392838	150449935	+	4785	4462	4900	4923	2384	3373	5154	5029	5101	4947	4328	4150	3585	3670	4663	4782	1838	3566	3438
ENSMUSG00000006014	Prg4		chr1	150449412	150466165	-	1175	692	835	358	444	318	487	528	751	608	526	388	925	421	431	776	897	653	381
ENSMUSG00000066842	Hmcn1		chr1	150562524	150993435	-	1042	818	1118	1220	311	551	1235	1098	1226	968	800	782	867	676	1017	801	321	540	783
ENSMUSG00000093650	Gm20631		chr1	150625266	150783499	+	11	2	1	1	1	1	3	1	1	0	0	1	0	0	5	3	0	0	2
ENSMUSG00000102628	Gm37671		chr1	151080450	151082545	+	5	17	16	27	9	10	7	11	6	13	6	11	10	12	19	22	2	12	21
ENSMUSG00000097426	Gm8941	pseudo_consens	chr1	151136507	151137780	+	0	7	3	9	1	4	21	11	4	25	9	12	10	5	13	5	0	3	3
ENSMUSG00000102095	C730036E19Rik		chr1	151138034	151142345	+	4	3	6	4	1	1	21	15	13	27	8	21	16	12	14	18	3	3	14
ENSMUSG00000114212	Gm47985	retrogene	chr1	151182537	151184243	+	0	0	1	1	0	0	0	0	0	1	2	2	0	0	0	1	0	2	0
ENSMUSG00000114694	Gm47995	retrogene	chr1	151198448	151199350	+	0	0	0	0	0	1	0	0	1	0	0	0	0	0	0	0	0	0	0
ENSMUSG00000100954	Gm10138		chr1	151339604	151345231	-	54	102	58	113	46	44	74	75	88	57	44	48	62	90	62	62	63	38	50
ENSMUSG00000023150	Ivns1abp		chr1	151344477	151364422	+	19017	17842	20341	20563	9085	11246	13129	12490	12888	12909	8463	9310	10072	15040	19152	16885	4185	9589	16868
ENSMUSG00000052748	Swt1		chr1	151367699	151428455	-	514	548	655	587	388	350	448	419	395	467	265	325	339	478	525	424	201	293	561
ENSMUSG00000053286	Trmt1l	ncRNA_host	chr1	151428542	151458161	+	925	717	749	928	588	484	708	664	537	625	457	450	525	704	1005	728	317	438	736
ENSMUSG00000106406	Mir7682		chr1	151442393	151442450	+	1	2	10	1	5	9	2	15	4	5	1	1	2	6	9	7	2	5	4
ENSMUSG00000103928	Gm37893		chr1	151445305	151447741	+	121	74	102	133	84	70	97	104	54	97	64	52	75	107	120	113	32	55	139
ENSMUSG00000026484	Rnf2		chr1	151458004	151500955	-	1277	1148	1321	1341	510	892	994	953	928	873	727	733	751	960	1086	1047	443	782	956
ENSMUSG00000103238	Gm36527		chr1	151496557	151499585	-	7	6	11	10	6	5	5	6	2	4	5	1	4	7	7	17	0	3	2
ENSMUSG00000100551	Gm19503	pseudo_consens	chr1	151520447	151520687	-	1	1	0	1	3	1	3	1	1	1	0	2	1	1	0	1	0	0	4
ENSMUSG00000026483	Fam129a		chr1	151571186	151721939	+	2678	2153	2658	2850	1274	1508	1740	1407	2062	1854	1445	1221	1406	1715	2012	2337	1309	1549	1794
ENSMUSG00000100594	2810414N06Rik		chr1	151748949	151755018	-	11	4	21	19	22	14	10	3	6	8	17	5	11	18	24	15	12	12	8
ENSMUSG00000043019	Edem3		chr1	151755371	151822051	+	2442	2109	2449	2453	1056	1912	2107	2268	2088	1986	1645	1614	1491	2057	2461	2291	750	1850	1966
ENSMUSG00000032666	1700025G04Rik	ncRNA_host	chr1	151852403	152090125	-	3032	2830	3114	3217	1573	1890	2356	2214	2310	2295	1898	1796	1642	2040	2191	2300	1542	1699	1921
ENSMUSG00000084557	Gm25279		chr1	151854823	151854955	-	0	0	0	11	2	0	0	0	0	0	0	1	0	0	1	4	0	0	0
ENSMUSG00000102090	Gm8964	pseudo_consens	chr1	152128585	152129389	+	0	0	0	0	0	0	0	0	0	0	0	0	0	1	0	0	2	2	0
ENSMUSG00000014980	Tsen15		chr1	152370735	152386688	-	316	264	278	371	151	194	210	224	228	283	201	165	175	245	240	215	170	152	267
ENSMUSG00000032649	Colgalt2		chr1	152399830	152510695	+	398	261	317	364	185	134	143	104	172	171	77	62	137	195	192	224	107	118	204
ENSMUSG00000026482	Rgl1	overlapping_locus	chr1	152516760	152766351	-	1731	1291	1914	2114	648	1159	1233	1232	1579	1380	1035	908	1100	1217	1813	1637	793	1293	1535
ENSMUSG00000086145	Gm15479	overlapping_locus	chr1	152684026	152687501	-	4	0	0	0	0	0	0	0	0	2	1	1	0	0	0	1	0	0	1
ENSMUSG00000080950	Gm7278	overlapping_locus	chr1	152729159	152730559	-	2	4	4	8	2	5	3	4	4	3	5	5	2	4	1	3	0	3	3
ENSMUSG00000008475	Arpc5		chr1	152766542	152775597	+	6157	6364	6386	7056	3267	4272	7625	7547	7057	6994	6591	5619	5429	5256	6935	6277	3389	5119	5651
ENSMUSG00000026480	Ncf2		chr1	152800194	152836991	+	583	548	533	771	280	300	523	507	492	577	600	348	439	485	670	755	355	504	688
ENSMUSG00000042772	Smg7		chr1	152836995	152902646	-	2814	2389	2711	2926	1176	1697	2587	2712	2388	2238	1809	1983	1844	2232	2665	2622	1183	1765	1946
ENSMUSG00000100394	Gm28791		chr1	152878520	152880298	-	5	5	1	6	43	2	5	0	0	0	11	2	3	5	0	2	9	1	4
ENSMUSG00000100702	Gm8976	pseudo_consens	chr1	152949395	152950097	-	0	0	0	0	0	0	0	3	0	1	1	0	0	0	2	0	0	0	1
ENSMUSG00000042751	Nmnat2		chr1	152954993	153119261	+	53	48	61	61	47	72	54	25	42	23	28	45	23	36	58	42	39	45	24
ENSMUSG00000099969	Gm28960		chr1	153066481	153089507	-	0	0	0	1	0	0	0	0	0	0	1	1	0	0	1	1	2	0	0
ENSMUSG00000026479	Lamc2		chr1	153122756	153186447	-	2006	2589	2185	2425	1248	1892	2114	2017	1829	1752	1738	1589	1374	1557	1797	2356	1412	1616	1138
ENSMUSG00000026478	Lamc1		chr1	153218922	153332786	-	5559	4526	5672	5814	2218	3891	4422	4140	4370	3781	3246	2915	3220	3764	4382	4801	2831	3453	3241
ENSMUSG00000103818	Gm38009		chr1	153283850	153287190	-	0	0	2	0	2	3	0	1	0	7	2	0	3	1	1	1	8	0	7
ENSMUSG00000079138	Gm8818	pseudo_consens	chr1	153305432	153306478	+	4	8	0	0	4	2	1	3	0	2	1	1	0	0	0	1	0	0	2
ENSMUSG00000073538	E330020D12Rik		chr1	153404827	153414233	-	21	33	26	28	34	21	25	19	35	33	12	9	21	43	34	43	6	24	48
ENSMUSG00000042708	Shcbp1l	ncRNA_host	chr1	153425162	153452574	+	21	20	12	23	10	17	18	10	32	14	11	15	11	39	22	21	3	14	24
ENSMUSG00000064435	Gm25588		chr1	153440079	153440218	+	0	3	0	0	0	1	2	0	0	3	0	1	1	3	0	4	0	0	1
ENSMUSG00000103543	Gm37669		chr1	153443481	153444300	+	5	1	2	2	2	4	9	7	10	3	5	0	1	14	1	4	2	0	4
ENSMUSG00000042699	Dhx9		chr1	153455758	153487660	-	4839	4791	4836	4960	2125	3208	5147	5217	5218	4614	4358	4119	3384	3481	4435	4654	1708	3107	2936
ENSMUSG00000042684	Npl		chr1	153503015	153550045	-	3013	3774	3210	3477	1256	2400	2541	2289	2175	2073	1972	1758	2013	2859	3334	3244	1088	1961	2322
ENSMUSG00000099858	Gm6652	pseudo_consens	chr1	153619604	153620673	-	16	24	11	18	2	5	8	4	10	1	4	5	5	10	12	2	3	8	13
ENSMUSG00000042671	Rgs8		chr1	153653025	153700323	+	40	23	39	47	12	38	45	35	35	48	23	23	22	27	21	27	6	13	30
ENSMUSG00000102404	5530400K19Rik		chr1	153714654	153716569	+	3	0	0	0	0	0	5	5	0	0	0	1	3	0	0	0	0	0	0
ENSMUSG00000100334	C230024C17Rik		chr1	153721240	153737829	-	1	0	0	3	1	0	0	0	5	2	3	2	1	0	0	0	0	4	1
ENSMUSG00000026475	Rgs16		chr1	153740349	153745468	+	120	96	181	154	139	70	245	190	164	223	164	120	140	105	130	119	84	98	69
ENSMUSG00000099568	Gm28513		chr1	153743552	153749324	-	0	1	0	0	0	0	0	2	0	0	2	0	0	0	0	0	0	0	1
ENSMUSG00000066800	Rnasel		chr1	153749426	153764221	+	869	628	963	1021	304	474	1186	832	1044	950	818	685	720	628	1050	1088	235	668	1035
ENSMUSG00000100183	Gm28512		chr1	153750682	153751547	+	6	15	24	15	10	4	16	20	18	19	21	15	12	19	5	17	4	11	20
ENSMUSG00000042641	Rgsl1		chr1	153779381	153844142	-	20	16	20	18	8	11	0	12	1	12	9	14	6	12	7	9	6	15	14
ENSMUSG00000045968	Teddm2		chr1	153849542	153900228	-	184	134	143	179	135	102	91	100	84	85	49	73	77	96	135	123	77	98	83
ENSMUSG00000043282	Teddm1b		chr1	153874345	153876871	+	13	2	6	2	1	2	3	0	12	15	0	1	1	2	0	14	0	1	1
ENSMUSG00000102459	Gm38352		chr1	153889741	153892297	-	9	18	12	17	28	8	9	9	2	3	4	4	5	18	4	7	17	6	13
ENSMUSG00000047053	Teddm1a		chr1	153891742	153893058	+	0	6	6	6	2	0	9	0	2	1	1	1	0	10	1	1	0	3	3
ENSMUSG00000026473	Glul		chr1	153899944	153909723	+	17058	12587	13302	14593	7165	7056	26287	24346	21179	23355	15684	14980	17819	11790	17280	14526	8753	11830	11742
ENSMUSG00000101903	Gm29291		chr1	154003396	154006221	-	13	19	24	22	6	9	11	3	8	9	9	10	5	7	33	12	0	13	20
ENSMUSG00000100502	Gm28286		chr1	154027363	154034301	-	60	38	60	49	18	34	29	47	22	18	13	34	17	73	60	40	19	29	83
ENSMUSG00000100627	A830008E24Rik	ncRNA_host	chr1	154037597	154117951	-	84	87	62	85	58	55	55	48	66	62	30	57	46	90	72	96	46	69	84
ENSMUSG00000088669	Gm25336		chr1	154080095	154080199	-	0	0	0	0	0	3	4	0	0	0	0	0	3	0	0	2	0	1	0
ENSMUSG00000066797	Zfp648		chr1	154201187	154205689	+	113	109	77	158	82	66	37	26	22	29	7	11	10	78	36	69	23	36	45
ENSMUSG00000004110	Cacna1e		chr1	154390731	154884501	-	1188	876	1324	1262	402	615	389	244	345	354	198	208	284	714	838	755	223	355	893
ENSMUSG00000101880	Gm29282		chr1	155011332	155057179	-	0	6	5	6	0	0	4	0	2	0	0	2	0	1	0	0	0	3	0
ENSMUSG00000096950	Gm9530		chr1	155063447	155083266	-	42	45	51	63	31	34	64	63	42	33	27	45	42	42	54	26	24	33	68
ENSMUSG00000056708	Ier5		chr1	155096361	155099636	-	1798	1618	1670	2144	620	1114	2895	3071	2513	2553	2314	2286	1881	1690	2310	1849	1047	1364	1323
ENSMUSG00000026471	Mr1		chr1	155127277	155146814	-	721	675	783	755	321	429	440	456	504	369	337	412	350	479	506	652	294	420	471
ENSMUSG00000026470	Stx6	overlapping_locus	chr1	155158715	155208256	+	2535	2692	2628	3024	1305	2020	3115	2995	3223	2877	2610	2530	2122	2050	2823	2567	1744	2060	1907
ENSMUSG00000104181	Gm8850	overlapping_locus	chr1	155179801	155180388	+	31	12	32	44	16	20	37	26	22	16	10	24	21	22	30	25	11	15	19
ENSMUSG00000033722	BC034090		chr1	155212471	155244444	-	256	313	295	383	205	192	275	182	206	205	109	169	139	270	252	252	136	147	256
ENSMUSG00000103670	Gm37622		chr1	155231304	155233159	+	7	0	0	3	2	7	6	0	1	3	0	0	3	3	10	7	4	1	2
ENSMUSG00000026469	Xpr1		chr1	155275701	155417415	-	1573	1350	1676	1739	709	1032	1544	1566	1453	1315	1227	1081	1048	1059	1497	1375	656	956	1135
ENSMUSG00000093286	Gm22569		chr1	155315966	155316089	+	0	0	0	0	0	0	0	0	0	0	0	0	0	0	0	4	0	0	1
ENSMUSG00000073535	Gm5532		chr1	155520173	155527143	-	20	16	28	12	53	6	13	29	23	11	19	14	12	9	8	36	11	24	15
ENSMUSG00000033701	Acbd6		chr1	155558120	155691330	+	2227	1929	1686	2520	1366	1740	1774	1554	1899	1589	1797	1515	1435	1760	1982	1929	2941	1639	1697
ENSMUSG00000026468	Lhx4		chr1	155698031	155751684	-	2	0	0	0	0	0	0	4	1	0	0	2	0	1	1	0	0	0	0
ENSMUSG00000103180	Gm37089		chr1	155766146	155766274	+	1	0	0	0	0	0	6	0	0	0	0	1	0	0	7	0	0	1	0
ENSMUSG00000033684	Qsox1		chr1	155776029	155812889	-	3620	3431	3401	4677	2087	2974	4750	4740	4715	4039	3892	3819	3265	3325	4558	3856	3494	3339	3418
ENSMUSG00000102299	Gm37539		chr1	155789124	155789358	+	3	8	1	2	4	1	3	2	6	13	2	4	2	3	9	0	0	3	5
ENSMUSG00000102558	Gm37571		chr1	155818494	155859591	+	0	1	1	0	0	1	0	0	4	7	0	1	0	2	0	0	0	0	0
ENSMUSG00000033671	Cep350		chr1	155844964	155973255	-	3133	2453	3500	3490	1104	2037	2874	2742	2732	2663	1982	2242	1870	2615	2753	2659	796	1918	2305
ENSMUSG00000103717	Gm38038	pseudo_consens	chr1	155855449	155855707	+	6	0	3	7	0	4	1	0	3	11	3	2	4	2	3	1	0	5	3
ENSMUSG00000103771	Gm36934	pseudo_consens	chr1	155864960	155865265	+	3	0	1	0	0	9	5	1	1	3	1	1	1	10	5	1	0	1	4
ENSMUSG00000102837	Gm37383		chr1	155881802	155882546	-	3	0	4	1	11	2	4	0	0	5	4	3	2	3	3	0	4	0	2
ENSMUSG00000102833	Gm9694		chr1	155973318	155974506	+	2	3	0	3	0	1	3	0	0	0	0	0	2	0	2	0	5	1	4
ENSMUSG00000026466	Tor1aip1		chr1	156004599	156036480	-	3367	2581	3194	2864	1632	1855	2162	2085	2244	1866	1693	1429	1625	2195	2576	2812	1690	2016	2254
ENSMUSG00000102964	9430034N14Rik		chr1	156026223	156030007	-	38	23	53	36	19	20	13	10	16	36	17	13	19	11	29	51	14	16	25
ENSMUSG00000050565	Tor1aip2		chr1	156035403	156068861	+	3452	3305	3518	3681	1833	2337	3595	3680	3448	3267	3019	2656	2550	2739	3435	3331	1841	2390	2611
ENSMUSG00000015484	Fam163a		chr1	156075966	156205026	-	7	1	0	8	0	2	5	0	0	2	1	0	2	4	0	2	3	0	1
ENSMUSG00000060985	Tdrd5		chr1	156255296	156303664	-	17	8	6	8	9	5	1	6	3	2	1	5	3	7	2	14	2	10	2
ENSMUSG00000026602	Nphs2		chr1	156310727	156328035	+	0	11	5	5	2	3	2	2	3	9	0	0	2	0	0	7	2	11	9
ENSMUSG00000026601	Axdnd1		chr1	156323509	156421159	-	27	32	27	32	14	14	9	10	12	14	3	17	12	58	66	38	10	17	47
ENSMUSG00000078193	Gm2000		chr1	156366040	156366484	+	136	179	163	284	195	143	268	238	211	239	266	209	210	143	215	183	227	172	236
ENSMUSG00000026600	Soat1		chr1	156424525	156474331	-	8257	7516	7308	9038	4367	5912	5550	5256	5644	5191	4269	4606	4371	8109	11312	8503	9224	7289	7877
ENSMUSG00000103199	Gm37648		chr1	156455290	156457852	+	4	6	8	11	11	10	17	1	19	18	9	5	8	4	14	6	11	10	12
ENSMUSG00000101523	Csnk2a3		chr1	156524012	156526644	+	84	70	101	77	42	59	100	89	121	75	72	56	51	105	52	103	36	66	66
ENSMUSG00000026596	Abl2		chr1	156558786	156649568	+	2269	1927	2134	2465	1123	1446	1797	2005	2009	1653	1617	1462	1218	1423	1977	1859	1106	1519	1376
ENSMUSG00000104293	Gm38043		chr1	156583108	156588248	+	27	25	15	15	65	25	20	28	14	26	18	11	15	32	22	11	31	13	19
ENSMUSG00000060519	Tor3a		chr1	156653617	156674356	-	1222	1192	1355	1516	543	853	1084	1021	1043	1026	769	725	809	1179	1313	1235	791	879	1056
ENSMUSG00000033557	Fam20b		chr1	156678532	156719086	-	4975	4426	4838	5411	1846	3122	3848	3664	3700	3422	2708	2663	2654	3613	4290	4236	2106	2831	3130
ENSMUSG00000046057	Gm15428		chr1	156793512	156793844	+	0	0	0	1	0	0	8	3	0	1	4	2	2	0	1	1	0	2	2
ENSMUSG00000026594	Ralgps2	overlapping_locus	chr1	156804166	156939626	-	2267	2238	2331	2531	1003	1509	2209	2266	2325	2120	1682	1828	1512	1740	2209	1987	834	1347	1518
ENSMUSG00000101964	Gm28693	overlapping_locus	chr1	156835287	156837924	-	6	3	5	4	5	2	5	2	5	12	6	3	2	9	11	2	2	4	6
ENSMUSG00000033544	Angptl1		chr1	156838562	156861078	+	540	404	539	571	229	224	313	223	324	243	145	121	221	328	257	424	157	184	286
ENSMUSG00000103303	Gm37802	overlapping_locus	chr1	156856217	156858859	-	8	19	12	15	17	18	11	7	4	13	16	10	15	8	8	8	7	11	16
ENSMUSG00000102960	Gm37943	overlapping_locus	chr1	156872177	156876120	-	4	2	11	0	2	1	3	0	2	0	6	3	2	10	14	1	1	2	6
ENSMUSG00000101905	4930439D14Rik		chr1	156939838	156940196	+	23	7	9	32	6	8	29	23	13	22	4	10	7	5	12	4	1	13	8
ENSMUSG00000103325	Gm10531		chr1	157043547	157045849	+	8	2	10	4	0	5	9	15	9	1	5	2	7	8	7	23	0	9	6
ENSMUSG00000026592	Tex35		chr1	157099139	157108680	-	1	0	0	0	0	1	1	3	2	2	7	4	1	0	3	6	1	2	0
ENSMUSG00000109913	Gm30694		chr1	157118948	157134399	+	4	5	3	0	5	3	7	0	3	4	4	1	2	5	3	0	0	2	2
ENSMUSG00000070565	Rasal2	overlapping_locus	chr1	157135182	157412595	-	1760	1474	1810	1974	679	1386	1484	1480	1626	1246	1001	1147	984	1247	1673	1581	537	1021	1084
ENSMUSG00000102326	Gm37788		chr1	157347339	157350043	-	2	16	9	5	73	10	5	4	1	1	7	9	8	14	9	6	28	9	1
ENSMUSG00000102391	Gm37578		chr1	157354474	157355650	-	0	0	0	2	0	4	0	1	6	5	0	0	0	3	2	1	0	1	0
ENSMUSG00000087632	Gm6058	overlapping_locus	chr1	157383931	157384329	-	5	1	0	8	85	0	5	1	3	1	1	6	7	2	3	0	35	1	2
ENSMUSG00000103808	Gm37060		chr1	157404325	157406721	-	0	7	3	4	15	2	0	1	3	5	1	2	2	0	5	3	2	1	3
ENSMUSG00000049881	2810025M15Rik	pseudo_consens	chr1	157412352	157420236	+	742	754	707	855	534	507	585	510	529	621	511	513	472	581	633	630	664	492	580
ENSMUSG00000033488	Cryzl2		chr1	157458577	157492638	+	378	454	380	607	208	354	355	301	418	263	299	322	246	414	463	464	325	323	347
ENSMUSG00000087093	Gm15486		chr1	157497931	157511721	-	2	0	0	0	0	1	0	2	1	0	0	0	0	6	0	0	0	0	0
ENSMUSG00000026589	Sec16b		chr1	157506728	157568425	+	524	459	663	868	318	494	401	293	406	314	265	285	294	406	485	565	211	342	433
ENSMUSG00000004031	Brinp2		chr1	158245269	158356326	-	9	20	4	7	11	7	9	3	8	15	9	12	12	3	16	8	2	6	5
ENSMUSG00000026587	Astn1	overlapping_locus	chr1	158362273	158691781	+	3	5	2	1	2	1	5	1	0	0	2	5	3	0	1	5	0	0	0
ENSMUSG00000073530	Pappa2	overlapping_locus	chr1	158711727	158980490	-	814	721	1128	970	180	481	409	377	393	464	30	317	307	640	656	532	40	593	688
ENSMUSG00000040782	Cop1	overlapping_locus	chr1	159232320	159347640	+	1511	1611	1644	1793	861	1134	1640	1313	1391	1366	1204	1194	1174	1246	1503	1413	587	1124	1238
ENSMUSG00000103572	Gm37115	overlapping_locus	chr1	159235710	159238558	+	0	0	10	4	3	0	2	4	0	6	3	3	4	1	0	1	0	0	3
ENSMUSG00000103186	Gm37088		chr1	159337414	159337819	-	2	9	11	20	8	8	4	3	5	6	6	13	2	4	7	5	2	5	10
ENSMUSG00000089536	Scarna3a		chr1	159340283	159340422	+	4	7	2	8	0	1	0	7	0	2	3	0	1	0	5	1	1	1	5
ENSMUSG00000015829	Tnr	overlapping_locus	chr1	159523769	159931729	+	2	4	10	3	7	2	5	1	2	3	5	2	1	3	3	2	5	2	1
ENSMUSG00000104111	Gm37294		chr1	160041701	160044331	-	2	0	0	0	0	0	0	8	2	0	0	2	0	0	2	0	0	1	1
ENSMUSG00000090394	4930523C07Rik		chr1	160044382	160080208	+	1206	909	1096	1027	729	597	665	705	618	561	533	520	603	587	813	860	689	706	692
ENSMUSG00000026729	4930562F07Rik		chr1	160074735	160077985	-	29	5	26	11	29	8	6	9	2	5	12	14	15	8	7	22	16	9	14
ENSMUSG00000026725	Tnn		chr1	160085029	160153580	-	76	53	84	119	49	77	188	141	194	149	162	159	125	77	119	119	77	51	45
ENSMUSG00000058267	Mrps14		chr1	160195215	160202170	+	924	1127	847	1045	733	620	1084	942	1006	1000	985	747	736	639	814	898	686	683	755
ENSMUSG00000014226	Cacybp		chr1	160202367	160212875	-	1446	1596	1356	1509	906	1052	1677	1675	1547	1693	1472	1318	1208	1011	1523	1121	435	919	1064
ENSMUSG00000103006	4933417C20Rik		chr1	160212943	160214816	+	15	8	15	14	1	10	6	12	4	20	5	5	11	6	9	7	4	7	9
ENSMUSG00000026721	Rabgap1l	overlapping_locus	chr1	160219174	160793211	-	2375	2125	2607	2504	882	1331	1957	1844	1871	1915	1349	1389	1361	1563	2104	2019	611	1182	1501
ENSMUSG00000104302	Gm36975		chr1	160264324	160443072	+	0	3	2	1	1	0	1	0	0	0	1	0	5	2	0	0	2	0	1
ENSMUSG00000103522	9430087J23Rik		chr1	160315344	160316495	-	0	1	1	0	1	2	0	0	0	0	0	0	0	1	0	1	0	0	0
ENSMUSG00000103693	Gm37529	overlapping_locus	chr1	160321686	160327078	-	6	14	8	9	32	7	5	5	2	7	10	3	2	12	13	9	12	3	10
ENSMUSG00000104026	Gm37212		chr1	160570161	160573810	-	0	0	4	0	0	1	0	0	2	0	0	0	0	2	0	0	1	0	0
ENSMUSG00000118401	Gpr52	overlapping_locus	chr1	160576338	160577974	-	8	0	6	1	3	2	8	0	4	8	0	2	1	4	2	4	0	13	1
ENSMUSG00000104020	Gm37215		chr1	160589882	160591140	-	0	0	8	0	2	0	0	0	0	0	1	0	2	0	0	0	0	0	3
ENSMUSG00000103391	Gm38302		chr1	160604115	160606190	-	0	0	0	0	0	1	0	1	5	0	1	0	0	3	4	0	0	0	1
ENSMUSG00000103432	6720464F23Rik		chr1	160608955	160612450	-	5	3	8	1	44	1	3	4	1	8	1	5	2	0	5	3	7	1	5
ENSMUSG00000102172	Gm37873		chr1	160648023	160650302	-	0	0	0	0	4	0	0	0	1	0	0	0	1	0	0	0	0	0	0
ENSMUSG00000103200	Gm37328	overlapping_locus	chr1	160726042	160726681	-	1	4	5	7	1	2	0	2	4	0	1	2	1	3	0	0	1	3	1
ENSMUSG00000103632	Gm38329		chr1	160727734	160728160	-	11	9	11	12	23	6	14	13	3	6	12	5	12	6	2	13	5	5	9
ENSMUSG00000104053	Gm38126		chr1	160755687	160759689	+	0	2	0	0	0	1	0	0	0	0	0	0	0	0	0	0	0	0	0
ENSMUSG00000102852	Gm37083		chr1	160798682	160800819	+	0	0	3	3	2	1	0	1	0	0	0	3	1	2	1	2	0	0	6
ENSMUSG00000057499	Gm6177	pseudo_consens	chr1	160893120	160893584	+	1	3	1	1	1	1	1	4	0	0	2	2	0	2	1	1	1	0	2
ENSMUSG00000040423	Rc3h1		chr1	160906418	160974978	+	2216	1667	2461	2481	988	1367	2308	2364	2045	2019	1457	1760	1398	2110	2209	1834	717	1503	1814
ENSMUSG00000103343	Gm37052		chr1	160910789	160912619	+	2	6	4	17	19	2	11	1	1	5	6	7	1	5	11	1	9	3	16
ENSMUSG00000103846	Gm37809		chr1	160913472	160914402	+	0	3	1	7	2	0	0	0	3	1	0	1	0	5	2	2	0	2	2
ENSMUSG00000103739	Gm37653		chr1	160915324	160918901	+	12	9	9	33	5	5	14	22	6	9	7	7	8	11	10	14	2	6	18
ENSMUSG00000026715	Serpinc1		chr1	160978585	161005863	+	6	13	21	21	5	11	27	16	5	9	12	7	7	10	8	18	5	9	14
ENSMUSG00000103222	Gm37729		chr1	160985758	160986929	+	1	0	0	1	1	2	0	0	1	0	0	1	1	1	1	0	4	0	1
ENSMUSG00000103680	Gm37072		chr1	161001009	161001845	-	3	1	0	1	8	0	0	0	2	0	1	0	3	1	2	0	0	0	1
ENSMUSG00000043467	Zbtb37		chr1	161002922	161034849	-	996	748	1294	1337	384	675	601	479	744	619	419	413	377	690	983	878	179	429	843
ENSMUSG00000104016	Gm37362		chr1	161030582	161031456	+	5	13	15	18	3	8	15	7	5	3	3	1	4	7	0	10	3	6	7
ENSMUSG00000053332	Gas5	ncRNA_host	chr1	161034422	161038539	+	5719	5602	5462	6552	5464	3835	5708	5809	5387	5539	4784	4329	4404	4388	5743	5358	2439	3377	5279
ENSMUSG00000026709	Dars2		chr1	161040601	161070658	-	469	402	403	501	214	343	498	448	535	470	382	326	380	402	462	405	228	310	347
ENSMUSG00000026708	Cenpl		chr1	161070713	161086724	+	202	191	234	269	113	175	326	327	338	346	420	287	232	186	196	170	130	146	178
ENSMUSG00000026705	Klhl20		chr1	161088375	161131511	-	1193	1240	1305	1378	559	893	940	904	980	893	696	756	664	951	1104	920	434	690	818
ENSMUSG00000044835	Ankrd45		chr1	161142691	161170498	+	5	1	7	4	3	4	0	4	1	0	1	3	3	0	0	0	1	2	5
ENSMUSG00000049160	Tex50		chr1	161154558	161159314	-	0	0	0	2	1	0	0	0	0	0	0	0	0	0	0	0	0	0	0
ENSMUSG00000102817	Gm6185		chr1	161176936	161237307	+	7	4	7	7	4	1	9	1	9	7	5	1	5	4	12	1	3	2	5
ENSMUSG00000026701	Prdx6		chr1	161240112	161251219	-	6109	6290	6010	7035	3036	3844	4593	4224	4419	3946	3493	2948	3595	4322	4935	4998	3979	3211	4108
ENSMUSG00000026700	Tnfsf4		chr1	161395409	161418410	+	0	0	6	2	0	0	11	7	3	3	7	3	9	0	11	9	1	2	1
ENSMUSG00000066755	Tnfsf18		chr1	161494655	161505290	+	86	49	70	58	41	47	32	14	22	52	21	26	16	91	75	44	24	62	90
ENSMUSG00000040323	Gm15429		chr1	161726242	161727489	-	59	63	69	102	38	45	73	61	56	53	60	54	48	41	73	60	67	47	74
ENSMUSG00000102399	Gm5049	pseudo_consens	chr1	161746056	161747645	+	1	0	0	1	0	1	2	0	0	0	1	0	0	0	0	0	0	1	0
ENSMUSG00000000817	Fasl		chr1	161780689	161788495	-	1	0	2	0	0	0	6	0	0	0	4	0	0	0	5	1	1	1	1
ENSMUSG00000103625	Gm37357		chr1	161811045	161814167	-	0	1	3	0	2	5	0	1	3	4	1	3	2	1	0	4	3	2	5
ENSMUSG00000040297	Suco		chr1	161816114	161876682	-	2079	1821	2063	2075	1062	1400	1664	1779	1955	1747	1355	1651	1209	1551	1846	1650	532	1393	1451
ENSMUSG00000102254	Gm7496	pseudo_consens	chr1	161821865	161823068	+	14	2	5	30	0	0	16	6	11	7	2	4	14	17	14	3	0	5	12
ENSMUSG00000103158	Gm31925		chr1	161890458	161903173	+	0	1	5	0	3	1	1	3	1	1	0	2	0	0	4	1	0	2	1
ENSMUSG00000086277	4930558K02Rik		chr1	161942086	161979636	-	0	2	6	4	0	0	0	0	0	0	2	1	0	0	10	0	1	1	0
ENSMUSG00000026698	Pigc	overlapping_locus	chr1	161969186	161973435	+	815	725	809	934	456	520	800	689	598	629	601	564	567	617	715	843	486	547	638
ENSMUSG00000103393	Gm38304	overlapping_locus	chr1	161969200	162027106	+	0	0	2	3	0	0	0	0	9	0	0	0	1	0	0	0	0	0	0
ENSMUSG00000040265	Dnm3		chr1	161982453	162478034	-	343	226	438	329	132	183	237	168	267	167	102	149	169	237	294	258	131	179	226
ENSMUSG00000090260	2810442N19Rik	overlapping_locus	chr1	162004969	162016494	+	10	7	16	6	0	5	3	12	7	2	1	4	4	7	3	19	2	4	3
ENSMUSG00000078190	Dnm3os	ncRNA_host	chr1	162217623	162225550	+	761	700	648	745	363	495	542	490	514	476	499	574	339	469	581	581	172	377	518
ENSMUSG00000026694	Eef1aknmt		chr1	162532127	162548551	-	1083	1052	815	1087	510	663	1012	1088	949	1040	782	646	715	973	1173	925	541	629	745
ENSMUSG00000026696	Vamp4		chr1	162570515	162599084	+	1648	1541	1791	1867	930	981	1472	1414	1264	1503	1204	1070	1129	1379	1578	1488	547	988	1544
ENSMUSG00000091743	Gm5705		chr1	162628357	162629067	-	0	2	4	1	2	1	0	0	0	2	1	0	4	5	6	0	0	0	2
ENSMUSG00000026697	Myoc		chr1	162639155	162649693	+	35441	30157	30195	37624	23169	25566	9553	10861	11075	9022	9128	7320	8030	19765	21374	23595	36373	23657	16597
ENSMUSG00000091060	Myocos		chr1	162647193	162658219	-	186	125	170	183	91	87	103	55	40	73	49	29	45	104	152	83	95	66	124
ENSMUSG00000040225	Prrc2c	ncRNA_host	chr1	162670725	162740556	-	7831	6397	7965	8687	3124	5078	6769	6838	6737	6045	4997	5080	4433	6064	6766	6937	2270	4031	5071
ENSMUSG00000098259	Gm27616		chr1	162674158	162674220	-	27	15	23	20	14	20	34	33	16	16	23	13	16	4	29	15	7	12	30
ENSMUSG00000026692	Fmo4		chr1	162793188	162813972	-	42	6	16	17	15	17	8	17	3	7	7	6	4	23	28	22	9	13	7
ENSMUSG00000040181	Fmo1		chr1	162829561	162866610	-	1698	1016	1155	1208	426	603	532	389	582	636	342	386	479	733	867	954	447	681	1026
ENSMUSG00000040170	Fmo2		chr1	162874317	162898726	-	2372	2308	2626	2331	580	1610	1251	1535	1509	1325	665	1081	1148	2235	2564	2200	452	1313	1920
ENSMUSG00000095576	Fmo6		chr1	162916551	162937515	-	12	1	0	2	0	1	9	4	1	5	1	3	6	3	2	0	0	1	0
ENSMUSG00000026691	Fmo3		chr1	162953800	162984528	-	0	8	6	8	7	2	2	1	0	5	0	3	2	0	6	1	1	4	6
ENSMUSG00000103288	Gm37273		chr1	162983014	163066682	+	0	0	0	0	0	1	0	8	0	0	0	0	0	0	0	0	1	0	0
ENSMUSG00000026586	Prrx1	overlapping_locus	chr1	163245119	163313710	-	5434	4286	5873	5894	3090	3453	3417	2999	3739	3443	2231	2162	2575	3664	3711	4002	2230	2917	3908
ENSMUSG00000092188	Gm20471		chr1	163280356	163287045	+	0	0	0	0	0	1	0	0	0	0	2	1	1	0	1	5	0	2	0
ENSMUSG00000103195	Gm37644	overlapping_locus	chr1	163306798	163309067	-	3	0	8	1	10	2	6	4	7	1	0	0	1	15	4	0	3	4	5
ENSMUSG00000040124	Gorab		chr1	163384908	163403669	-	443	420	541	472	214	363	388	404	344	344	267	214	255	326	446	398	165	295	343
ENSMUSG00000088951	Gm24940		chr1	163402283	163402390	+	2	1	4	0	0	3	0	0	5	0	1	1	0	0	0	0	0	3	0
ENSMUSG00000102117	Rpsa-ps1	pseudo_consens	chr1	163623793	163624678	+	11	11	1	26	12	11	6	9	13	8	11	11	11	11	13	20	17	6	9
ENSMUSG00000040113	Mettl11b		chr1	163702256	163725232	-	35	28	40	25	48	20	15	5	9	11	4	5	12	8	15	14	17	10	8
ENSMUSG00000026585	Kifap3		chr1	163779583	163917109	+	1091	957	1184	1156	705	787	943	945	961	862	781	738	680	769	794	964	506	697	714
ENSMUSG00000026584	Scyl3		chr1	163929100	163955126	+	1545	1613	1579	1874	646	1070	1422	1539	1383	1279	1152	1210	998	1140	1760	1436	554	993	1256
ENSMUSG00000041406	BC055324		chr1	163945993	163994796	-	163	188	168	219	103	138	276	269	226	246	249	197	145	135	239	162	89	108	145
ENSMUSG00000041396	Mettl18		chr1	163994889	163997243	+	106	137	118	113	79	82	128	79	102	108	96	87	87	95	122	92	54	72	95
ENSMUSG00000026582	Sele		chr1	164048234	164057677	+	81	89	125	117	58	68	135	112	145	105	105	99	117	81	103	109	59	74	93
ENSMUSG00000026581	Sell		chr1	164061982	164084181	+	9	19	0	18	4	3	24	15	13	44	37	17	8	6	12	10	6	8	4
ENSMUSG00000026580	Selp		chr1	164115264	164150026	+	190	151	204	259	80	99	240	228	302	266	234	218	309	139	223	224	123	155	142
ENSMUSG00000090081	Gm16587		chr1	164143432	164146366	-	4	1	0	0	0	0	0	0	0	0	1	2	1	2	0	5	1	5	0
ENSMUSG00000086593	Gm16548		chr1	164148591	164152217	-	2	0	1	0	3	1	1	1	6	0	5	5	1	0	0	8	0	0	6
ENSMUSG00000026579	F5	overlapping_locus	chr1	164151838	164220277	+	7	15	6	4	13	15	97	43	120	42	68	89	45	8	5	9	8	26	10
ENSMUSG00000040918	Slc19a2		chr1	164249046	164265385	+	1450	1451	1410	1494	540	954	1514	1642	1557	1376	1265	1466	1125	1105	1497	1311	455	1013	990
ENSMUSG00000026578	Ccdc181		chr1	164275585	164287847	+	427	385	480	504	351	392	355	326	351	404	291	335	321	446	415	429	241	322	379
ENSMUSG00000026577	Blzf1		chr1	164289800	164307489	-	1984	2003	2127	2120	961	1481	2117	2547	2043	2075	1635	2110	1574	1619	1998	2039	682	1381	1527
ENSMUSG00000026575	Nme7		chr1	164304121	164437725	+	250	250	252	384	215	212	388	342	367	398	386	342	244	214	275	203	198	253	196
ENSMUSG00000103493	Gm37411		chr1	164424713	164426994	+	13	4	25	9	5	9	17	6	13	3	5	14	1	10	4	31	5	6	12
ENSMUSG00000026576	Atp1b1		chr1	164437109	164458355	-	2719	1445	1839	1356	1539	1098	2252	2366	2453	1805	1440	1556	1872	1048	1273	1706	952	1178	786
ENSMUSG00000104011	Gm32391		chr1	164462442	164463989	+	13	19	27	22	44	13	7	17	8	12	8	4	13	15	22	8	14	12	15
ENSMUSG00000097281	Gm26685		chr1	164503309	164514882	+	5	0	0	1	0	0	1	3	0	4	1	3	1	1	1	2	1	0	1
ENSMUSG00000102389	D630023O14Rik		chr1	164575455	164578553	+	0	2	5	1	2	2	0	2	1	3	2	0	2	5	1	6	1	2	3
ENSMUSG00000102761	Gm37184		chr1	164681982	164712771	+	0	0	1	0	0	1	1	0	0	0	0	0	0	0	0	0	1	0	0
ENSMUSG00000026574	Dpt		chr1	164796644	164824266	+	9824	8536	11108	12436	3818	4450	6062	5098	6442	5995	3537	3328	5055	5582	7312	7798	2957	4477	9461
ENSMUSG00000103659	Gm32569	overlapping_locus	chr1	164803969	164899591	-	13	6	2	10	5	3	3	7	1	3	2	3	2	4	6	8	6	3	4
ENSMUSG00000104117	Gm20743		chr1	164863133	164936775	+	25	22	17	60	17	11	6	8	8	8	7	6	6	22	20	22	0	9	16
ENSMUSG00000103320	Gm37403	overlapping_locus	chr1	164872833	164876353	-	0	14	3	4	8	0	2	0	7	5	1	0	3	1	16	4	0	2	4
ENSMUSG00000026573	Xcl1		chr1	164931644	164935527	-	74	61	60	164	43	59	10	8	1	15	4	1	9	60	67	27	23	28	82
ENSMUSG00000026572	Tbx19	overlapping_locus	chr1	165137855	165160773	-	0	0	0	0	0	1	0	0	0	0	0	0	0	0	2	0	0	0	0
ENSMUSG00000040848	Sft2d2		chr1	165174337	165194438	-	7149	6734	7328	7784	2505	4781	5922	5515	6031	5382	4438	4525	4155	5424	6502	6293	2922	4227	4901
ENSMUSG00000040843	Tiprl	overlapping_locus	chr1	165212286	165236996	-	1026	1058	1027	1061	605	713	858	715	820	834	769	636	680	825	973	840	600	731	886
ENSMUSG00000102302	Gm38190	overlapping_locus	chr1	165230371	165235125	-	84	65	120	176	30	80	106	83	70	103	46	45	32	104	128	115	24	56	132
ENSMUSG00000040836	Gpr161		chr1	165295789	165326745	+	824	882	964	934	399	614	745	629	658	586	544	440	496	546	708	659	391	477	465
ENSMUSG00000026571	Dcaf6	overlapping_locus	chr1	165328698	165460475	-	2310	2091	2789	2492	1409	1576	1357	1297	1418	1389	1028	1068	1181	1461	1859	1955	1035	1378	1776
ENSMUSG00000104427	Gm38368		chr1	165379519	165380853	+	17	7	6	13	9	2	0	0	3	1	1	2	0	11	10	3	5	2	4
ENSMUSG00000102401	Gm37864	overlapping_locus	chr1	165451555	165454629	-	7	0	3	0	2	0	3	0	0	14	0	1	2	3	1	1	2	1	4
ENSMUSG00000026568	Mpc2	overlapping_locus	chr1	165460637	165481214	+	2434	2884	2112	2555	1708	1767	1639	1481	1660	1537	1386	1191	1359	1664	2074	1919	1595	1534	1939
ENSMUSG00000103763	Gm37860	overlapping_locus	chr1	165467500	165468533	+	12	0	19	4	5	7	1	18	12	6	6	7	5	11	17	7	8	5	7
ENSMUSG00000026567	Adcy10	overlapping_locus	chr1	165485183	165576774	+	25	2	2	3	4	11	6	0	9	2	8	2	7	12	7	5	2	2	6
ENSMUSG00000104474	Gm38210		chr1	165585183	165585991	+	0	0	0	2	1	0	0	0	0	0	0	0	0	3	1	2	0	0	0
ENSMUSG00000026566	Mpzl1	overlapping_locus	chr1	165592240	165634538	-	1346	1393	1539	1623	773	1024	974	746	987	888	691	716	635	1065	1002	1077	871	777	910
ENSMUSG00000103098	Gm37559	overlapping_locus	chr1	165613059	165613890	-	8	3	5	8	1	11	7	1	2	15	4	0	0	5	6	9	2	5	4
ENSMUSG00000104517	Gm18407	pseudo_consens	chr1	165643899	165644688	-	2	1	5	8	6	1	0	5	0	1	1	2	2	16	1	10	3	2	7
ENSMUSG00000040723	Rcsd1		chr1	165646516	165709757	-	1168	948	1034	1164	831	650	535	482	641	676	487	392	616	750	819	1027	714	692	911
ENSMUSG00000103686	Gm37073		chr1	165721556	165722777	+	0	0	2	0	0	0	0	0	0	1	0	2	0	0	1	0	0	8	0
ENSMUSG00000103242	Gm34767	pseudo_consens	chr1	165734600	165735661	-	0	0	7	0	0	0	0	0	0	0	1	0	3	0	5	2	1	1	2
ENSMUSG00000040713	Creg1		chr1	165763746	165775308	+	2981	2556	2674	3273	963	1923	2271	2157	2608	2132	1685	1678	1743	2146	3002	2679	1403	2223	2651
ENSMUSG00000104306	Gm36972		chr1	165775868	165777155	-	2	0	0	0	0	0	0	2	0	0	1	2	2	6	12	1	1	0	1
ENSMUSG00000089829	Gm16565	overlapping_locus	chr1	165781075	165789367	+	13	26	25	20	11	15	21	11	13	10	8	7	3	6	11	1	6	4	19
ENSMUSG00000005763	Cd247	overlapping_locus	chr1	165788681	165877277	+	318	260	348	472	180	213	148	146	103	125	150	114	134	180	252	239	177	164	341
ENSMUSG00000102363	Gm32999		chr1	165844047	165844608	-	3	5	4	0	3	0	4	6	0	0	2	0	0	3	0	0	0	0	3
ENSMUSG00000103768	Gm37856		chr1	165845087	165846085	-	5	3	3	2	8	5	0	1	2	4	5	1	5	1	3	5	5	5	3
ENSMUSG00000102154	Gm37469		chr1	165848155	165849044	-	3	1	11	2	0	2	4	4	1	2	0	0	1	4	7	0	0	0	6
ENSMUSG00000026565	Pou2f1		chr1	165865154	166002678	-	1202	1179	1379	1430	680	848	1050	893	1050	1120	827	840	619	858	1134	1029	526	695	794
ENSMUSG00000099008	Gm17976	pseudo_consens	chr1	165941618	165943526	+	0	0	0	1	0	0	1	0	0	0	0	1	1	0	0	0	0	0	0
ENSMUSG00000026564	Dusp27		chr1	166098148	166127922	-	352	314	320	174	401	219	116	143	138	126	111	113	152	176	163	293	285	206	101
ENSMUSG00000000544	Gpa33		chr1	166130238	166166510	+	0	0	0	1	0	3	7	2	1	10	1	2	1	1	0	1	0	1	0
ENSMUSG00000040612	Ildr2		chr1	166254139	166316823	+	218	223	242	294	113	168	125	199	137	154	112	107	128	173	151	162	114	196	182
ENSMUSG00000091393	5330438I03Rik		chr1	166306741	166309585	-	7	0	11	1	0	0	0	0	0	0	2	0	1	0	0	0	0	0	2
ENSMUSG00000103400	Gm15853		chr1	166377878	166380493	-	31	27	16	39	12	18	30	19	25	19	17	22	15	37	22	25	15	19	27
ENSMUSG00000026563	Tada1		chr1	166379097	166393621	+	564	493	494	554	214	309	489	452	464	447	360	375	316	402	520	420	199	320	405
ENSMUSG00000040596	Pogk		chr1	166384622	166409863	-	2190	1879	2606	2303	690	1460	1476	1485	1518	1365	959	1141	1075	1609	2067	1717	790	1215	1665
ENSMUSG00000084093	Gm16418		chr1	166431705	166431875	-	29	14	12	32	24	15	27	33	20	29	32	23	19	18	28	22	26	16	18
ENSMUSG00000086056	Gm4846		chr1	166483613	166497588	-	0	0	2	0	0	0	0	0	0	0	0	0	1	0	0	0	0	0	0
ENSMUSG00000051081	Gm4847		chr1	166628971	166647693	-	1	0	0	0	0	0	0	0	0	0	0	0	0	0	0	0	0	1	0
ENSMUSG00000086925	Gm6286	pseudo_consens	chr1	166945597	166946358	-	0	2	2	2	1	1	1	0	3	1	0	1	1	3	0	1	1	1	1
ENSMUSG00000102548	Gm16701		chr1	166974023	166999728	-	0	0	6	2	0	0	1	1	0	1	0	0	1	0	2	0	2	2	0
ENSMUSG00000060568	Fam78b		chr1	167001417	167091302	+	154	180	250	197	64	144	144	146	128	152	136	123	83	132	172	117	104	118	120
ENSMUSG00000026558	Uck2		chr1	167222883	167285320	-	2774	3031	2416	2884	1284	1772	3833	3765	3901	3465	3644	3259	2620	2033	2846	2839	1619	1720	1578
ENSMUSG00000103139	Gm37982		chr1	167242457	167251492	+	0	0	1	3	0	1	0	0	1	0	2	0	0	0	0	2	0	0	4
ENSMUSG00000102909	Gm2453		chr1	167285068	167289856	+	4	0	4	0	0	3	2	4	4	0	0	2	0	1	2	7	4	0	4
ENSMUSG00000052428	Tmco1		chr1	167308378	167333978	+	1290	1337	1191	1417	784	912	1291	1136	1246	1276	1120	1024	1081	1047	1159	1157	744	970	1108
ENSMUSG00000088246	Gm25911		chr1	167340369	167340424	-	0	0	0	0	3	0	0	0	0	3	0	1	0	1	0	0	0	0	2
ENSMUSG00000095752	Gm24182		chr1	167349025	167349131	+	0	1	0	0	2	0	0	0	1	0	0	0	0	0	0	0	0	2	0
ENSMUSG00000026687	Aldh9a1		chr1	167349991	167368532	+	2126	1941	1888	2647	1021	1575	1875	2008	2195	2038	1726	1553	1517	1680	2142	2064	1858	1741	1685
ENSMUSG00000026688	Mgst3		chr1	167371966	167393841	-	1760	1774	1434	1678	1647	994	1447	1368	1646	1312	1213	1226	1148	921	1334	1482	1488	1135	974
ENSMUSG00000040485	Lrrc52		chr1	167445669	167466780	-	39	21	13	12	16	10	5	14	13	1	10	3	6	10	5	22	16	16	3
ENSMUSG00000015843	Rxrg		chr1	167598384	167639623	+	144	136	122	118	145	94	72	37	61	64	58	54	63	73	86	103	90	76	80
ENSMUSG00000026686	Lmx1a		chr1	167689237	167848741	+	8	43	47	38	20	26	26	12	30	12	4	7	12	9	35	16	18	19	19
ENSMUSG00000093538	Gm20711		chr1	168004139	168122465	+	5	0	4	2	0	1	0	0	0	0	0	2	0	1	0	0	1	0	0
ENSMUSG00000052534	Pbx1	overlapping_locus	chr1	168119364	168432270	-	4066	3554	4444	4863	2411	2723	3593	3388	3837	3778	2901	2416	2497	2848	3374	3835	2308	2480	2774
ENSMUSG00000103780	Gm37524	overlapping_locus	chr1	168335980	168337671	-	0	0	0	0	0	3	0	0	3	5	0	3	1	7	3	3	1	1	0
ENSMUSG00000102594	Gm38381	overlapping_locus	chr1	168348534	168350808	-	4	4	1	7	1	3	5	2	2	4	2	4	1	2	8	5	1	5	0
ENSMUSG00000058622	Gm5265	pseudo_consens	chr1	169453528	169453869	-	0	1	0	1	0	0	3	0	0	0	2	0	0	0	0	0	1	0	0
ENSMUSG00000026683	Nuf2		chr1	169497934	169531464	-	159	154	178	239	130	130	471	362	378	502	582	338	274	166	134	205	136	200	121
ENSMUSG00000026678	Rgs5		chr1	169655501	169695813	+	3704	3365	4077	3475	2280	2392	2366	1903	2314	2137	1961	2130	1910	2260	2382	3078	1363	2562	2326
ENSMUSG00000038530	Rgs4		chr1	169741477	169747642	-	211	181	225	134	169	100	572	573	238	496	308	167	249	126	206	148	115	174	145
ENSMUSG00000070532	Ccdc190		chr1	169928648	169934653	+	8	2	4	7	1	0	5	2	4	5	2	0	5	1	5	0	1	2	4
ENSMUSG00000089990	Gm15852		chr1	169932698	169934248	-	0	1	0	0	0	1	0	0	0	0	0	0	1	0	0	2	1	0	0
ENSMUSG00000026675	Hsd17b7		chr1	169949535	169969241	-	4219	3942	3882	5375	3958	6803	4244	5342	5015	3731	4777	5218	2980	3871	6026	4501	6419	6172	3663
ENSMUSG00000097503	3110045C21Rik		chr1	169969409	169972396	+	19	30	29	43	13	22	21	17	13	21	26	25	30	32	16	34	13	26	32
ENSMUSG00000026674	Ddr2		chr1	169972307	170110762	-	3633	3265	4339	4213	2165	2270	3204	2903	3335	2897	2194	2694	2313	2621	3458	3642	1181	2210	2935
ENSMUSG00000026670	Uap1		chr1	170141938	170174957	-	1746	1377	1559	1705	1003	1118	1233	1308	1211	1076	999	868	1010	1163	1413	1361	742	1192	1248
ENSMUSG00000104266	Gm37748		chr1	170175180	170176319	+	12	3	5	5	1	2	1	1	4	4	0	0	2	1	0	6	0	1	4
ENSMUSG00000103908	Gm37502		chr1	170175382	170177772	-	1	5	0	2	0	0	0	2	1	1	2	0	0	0	0	1	2	1	1
ENSMUSG00000026667	Uhmk1		chr1	170193420	170215397	-	3179	2837	3461	3632	1409	2147	2976	2935	2883	2668	2344	2321	2037	2669	2970	2776	1209	2039	2380
ENSMUSG00000044306	4930500M09Rik		chr1	170214860	170216422	+	3	0	0	0	0	0	0	0	0	0	0	1	1	4	0	0	0	0	0
ENSMUSG00000073494	Sh2d1b2		chr1	170232749	170253608	+	0	0	1	0	0	0	0	0	0	2	0	3	0	0	0	0	0	0	0
ENSMUSG00000096964	Gm6345		chr1	170254049	170255739	-	16	9	7	12	1	10	8	10	9	8	3	3	5	17	17	13	4	6	14
ENSMUSG00000102418	Sh2d1b1		chr1	170277320	170286769	+	12	39	24	34	9	14	45	64	39	55	57	49	46	27	35	26	19	34	62
ENSMUSG00000102752	Gm7694	overlapping_locus	chr1	170298199	170306332	-	516	567	542	640	230	371	311	285	298	324	276	247	225	320	398	369	262	256	391
ENSMUSG00000038473	Nos1ap	overlapping_locus	chr1	170302668	170589861	-	153	145	189	203	99	129	126	78	130	114	89	81	63	103	124	143	75	99	133
ENSMUSG00000042800	Spata46		chr1	170308803	170312125	+	36	24	51	38	17	18	15	23	14	23	9	15	16	26	26	30	7	10	25
ENSMUSG00000102193	Gm7299	pseudo_consens	chr1	170630921	170631501	+	0	2	1	0	2	0	2	0	0	4	2	0	0	1	0	0	0	0	3
ENSMUSG00000038463	Olfml2b		chr1	170644532	170682789	+	1408	1452	1368	1919	596	961	1112	839	1141	1066	840	818	738	960	987	1048	691	813	735
ENSMUSG00000026663	Atf6	ncRNA_host	chr1	170704674	170867771	-	2139	1777	2069	2237	846	1377	2033	2194	2075	1887	1613	1511	1418	1698	2018	1964	949	1395	1507
ENSMUSG00000096547	Gm25235		chr1	170832765	170832871	-	0	0	0	1	0	1	0	2	0	4	0	0	0	0	5	0	0	1	0
ENSMUSG00000053925	Gm9929		chr1	170868645	170881721	+	111	47	114	143	77	53	82	100	60	64	37	52	47	63	100	75	35	50	107
ENSMUSG00000026659	Dusp12		chr1	170873498	170885540	-	416	382	362	504	285	298	294	294	310	305	228	211	224	354	393	309	184	245	355
ENSMUSG00000096968	Gm26620		chr1	170885065	170885881	+	0	1	4	15	3	8	2	4	4	2	6	2	5	2	3	3	5	5	11
ENSMUSG00000070524	Fcrlb		chr1	170907273	170912941	-	25	23	36	43	9	21	14	27	7	20	17	18	7	20	19	29	10	21	16
ENSMUSG00000038421	Fcrla	overlapping_locus	chr1	170917576	170927583	-	15	10	33	32	7	6	7	4	1	3	10	3	0	20	1	11	2	9	6
ENSMUSG00000089838	Gm2962	overlapping_locus	chr1	170925309	170925644	-	10	4	0	5	0	2	1	4	0	5	4	2	2	5	4	3	2	3	5
ENSMUSG00000026656	Fcgr2b		chr1	170958617	170976547	-	1976	1562	2302	2847	596	1221	1565	1449	1363	1786	1901	1263	907	1403	1768	2254	882	1674	1664
ENSMUSG00000103676	Gm38204		chr1	170973373	170977746	+	4	4	0	0	0	0	0	0	3	2	5	0	0	0	2	2	0	0	0
ENSMUSG00000104340	Gm10522		chr1	170981944	170986466	+	3	9	15	3	3	5	10	2	10	0	1	4	0	4	7	14	0	2	2
ENSMUSG00000059089	Fcgr4	ncRNA_host	chr1	171018920	171029761	+	6	13	11	5	8	5	163	180	88	126	86	53	140	59	118	198	15	37	107
ENSMUSG00000059498	Fcgr3	ncRNA_host	chr1	171051174	171064935	-	876	1065	1120	1420	353	830	800	714	861	892	831	587	636	835	1178	1193	650	1182	1603
ENSMUSG00000099119	Mir6546		chr1	171064591	171064652	-	0	0	0	2	0	0	0	0	0	2	0	0	0	1	0	6	0	0	3
ENSMUSG00000026649	Cfap126		chr1	171113918	171126967	+	11	27	26	13	15	23	24	12	18	26	19	14	10	8	11	18	19	26	17
ENSMUSG00000058076	Sdhc		chr1	171127165	171150603	-	3821	3640	3006	3751	2773	2300	3409	2744	3373	3003	2754	2249	2513	2424	3024	3355	3034	2421	2566
ENSMUSG00000056569	Mpz		chr1	171150711	171161130	+	7777	8190	8180	9141	6804	6125	3478	2911	3197	3101	3204	2079	2621	4807	4974	6004	10192	4487	3541
ENSMUSG00000038370	Pcp4l1		chr1	171173262	171196268	-	2220	1307	1580	1485	1903	838	745	734	822	826	507	372	699	862	836	1349	1273	857	855
ENSMUSG00000005677	Nr1i3		chr1	171213970	171220701	+	15	7	13	21	7	7	5	15	0	6	8	14	5	9	4	11	7	5	13
ENSMUSG00000005674	Tomm40l		chr1	171216011	171222514	-	356	359	382	503	241	225	386	347	369	391	304	232	285	347	362	377	257	215	341
ENSMUSG00000005681	Apoa2		chr1	171225054	171226379	+	1	1	3	6	7	0	1	4	19	2	3	2	2	0	1	1	1	3	2
ENSMUSG00000058715	Fcer1g		chr1	171229572	171234365	-	694	809	851	946	366	478	1290	984	897	1129	998	587	959	768	1115	1233	761	859	1270
ENSMUSG00000013593	Ndufs2		chr1	171234853	171251388	-	5802	5846	5303	5793	4880	3896	5317	4757	5202	4974	4803	4093	4156	3958	4728	4875	4966	4023	4091
ENSMUSG00000006403	Adamts4		chr1	171250421	171260637	+	28	25	21	61	39	78	92	89	63	82	128	134	39	18	45	44	32	44	12
ENSMUSG00000052423	B4galt3		chr1	171270328	171276896	+	884	825	941	1007	495	532	679	631	674	636	425	517	432	700	908	742	369	472	751
ENSMUSG00000062729	Ppox		chr1	171275990	171281186	-	1580	1519	1577	1686	935	992	1160	999	997	1037	830	755	840	1225	1540	1410	632	760	1437
ENSMUSG00000053483	Usp21		chr1	171281945	171287991	-	1139	1102	1102	1396	693	719	922	829	747	817	643	622	651	923	1072	889	502	643	932
ENSMUSG00000062963	Ufc1		chr1	171288563	171295024	-	1985	2202	1834	2396	1420	1426	1845	1686	1823	1677	1597	1435	1412	1411	1869	1899	1637	1401	1479
ENSMUSG00000079137	Rpl27-ps1		chr1	171305087	171305494	-	4	1	1	1	1	2	1	1	1	3	3	6	2	4	2	5	3	0	4
ENSMUSG00000103983	Gm20045		chr1	171320601	171326177	-	127	112	167	150	151	111	188	106	90	108	104	99	107	142	136	150	54	99	203
ENSMUSG00000013973	Dedd		chr1	171329145	171342331	+	459	363	379	447	247	286	350	370	359	341	296	313	282	368	401	345	231	270	385
ENSMUSG00000013997	Nit1		chr1	171338008	171345646	-	972	964	931	1178	478	703	975	953	834	875	788	760	763	807	983	952	550	645	846
ENSMUSG00000006412	Pfdn2		chr1	171345670	171359254	+	1605	1576	1362	1665	1386	914	1440	1613	1524	1376	1310	1197	1149	1105	1445	1493	1013	1013	1124
ENSMUSG00000102929	Gm37154		chr1	171354126	171355415	+	16	8	25	15	9	15	25	23	18	27	22	25	17	25	16	23	6	21	29
ENSMUSG00000045259	Klhdc9		chr1	171358446	171360798	-	32	27	28	53	21	29	17	28	23	18	21	6	19	15	19	22	22	24	18
ENSMUSG00000103727	Gm37097	pseudo_consens	chr1	171362862	171363197	+	0	2	1	0	3	0	0	0	6	0	0	1	1	1	3	5	0	0	0
ENSMUSG00000006411	Nectin4		chr1	171370099	171388598	+	8021	8577	7097	8157	2916	5281	7401	7968	7594	6266	5433	6050	5346	5887	6758	6742	2885	4236	4568
ENSMUSG00000048865	Arhgap30		chr1	171388954	171410298	+	973	974	1289	1346	433	629	1208	1033	1051	1092	989	849	895	1015	1466	1427	494	859	1312
ENSMUSG00000026641	Usf1	overlapping_locus	chr1	171411313	171419142	+	1374	1344	1341	1683	989	952	1499	1354	1178	1284	1246	1054	1095	1105	1408	1304	1090	973	1259
ENSMUSG00000103711	Tstd1	overlapping_locus	chr1	171418872	171420352	+	45	36	43	48	44	31	54	45	40	37	41	35	38	55	29	42	19	32	51
ENSMUSG00000038235	F11r		chr1	171437535	171464603	+	2314	2363	2510	2650	1345	1690	3058	2967	2805	2622	2534	2330	2174	2187	2162	2277	1474	1696	2054
ENSMUSG00000091993	B930036N10Rik	ncRNA_host	chr1	171500568	171504111	-	8	0	3	8	1	5	4	0	7	4	8	5	4	9	1	2	4	7	4
ENSMUSG00000060244	Alyref2		chr1	171503478	171504750	+	79	91	85	173	80	100	98	51	72	77	68	61	66	81	93	107	55	56	86
ENSMUSG00000004709	Cd244a		chr1	171559193	171609746	+	246	259	355	424	124	134	151	153	104	185	157	91	96	197	253	233	105	155	253
ENSMUSG00000004707	Ly9		chr1	171588624	171607410	-	130	128	157	120	28	55	119	117	170	150	115	76	124	147	164	232	51	118	223
ENSMUSG00000038179	Slamf7	ncRNA_host	chr1	171632403	171653035	-	330	253	365	364	71	150	204	195	158	203	166	95	155	251	342	304	94	186	365
ENSMUSG00000103219	Gm37787		chr1	171634879	171636022	+	0	5	6	0	4	2	1	0	3	0	1	0	3	2	6	9	1	6	5
ENSMUSG00000103083	A630035G10Rik		chr1	171676684	171681980	-	7	7	3	5	0	2	0	0	0	3	0	1	0	0	0	1	0	0	0
ENSMUSG00000103137	Gm37981	pseudo_consens	chr1	171679336	171679870	-	2	0	0	0	0	0	0	0	0	1	0	0	0	0	2	9	1	1	2
ENSMUSG00000015355	Cd48		chr1	171682009	171705258	+	239	212	366	378	109	164	264	245	290	388	216	182	233	281	322	271	123	266	423
ENSMUSG00000103883	Gm37010		chr1	171688311	171690014	+	3	1	3	5	18	0	1	0	5	2	1	2	1	0	3	0	7	4	6
ENSMUSG00000059058	Tma7-ps		chr1	171711088	171711282	+	10	1	2	10	4	1	7	8	7	7	4	6	7	1	7	2	1	4	5
ENSMUSG00000104440	Gm19030	pseudo_consens	chr1	171729915	171730466	+	0	0	0	0	0	0	1	0	0	1	0	0	0	0	0	0	0	1	0
ENSMUSG00000015316	Slamf1		chr1	171767127	171801184	+	15	14	11	14	6	4	40	17	23	14	16	19	11	7	19	22	4	14	11
ENSMUSG00000038147	Cd84		chr1	171839697	171890718	+	435	345	531	637	152	225	351	361	436	435	358	234	289	367	525	661	118	392	476
ENSMUSG00000073492	Gm10521		chr1	171895664	171898237	+	22	15	41	34	12	12	32	13	17	23	14	12	16	21	48	50	5	21	37
ENSMUSG00000104413	Gm37065		chr1	171909957	171919356	-	0	0	0	0	0	0	0	0	0	0	1	0	0	3	0	0	0	0	0
ENSMUSG00000015314	Slamf6		chr1	171917515	171953170	+	16	24	9	17	2	9	27	21	12	10	20	16	5	13	15	40	3	7	26
ENSMUSG00000026556	Vangl2		chr1	172000960	172028444	-	1893	2027	2118	2219	1321	1405	2140	2146	2028	1884	1602	1655	1490	1629	1813	1484	994	1130	1286
ENSMUSG00000051251	Nhlh1		chr1	172052292	172057573	-	49	59	53	58	27	70	24	37	21	26	21	12	34	40	54	26	38	50	27
ENSMUSG00000003458	Ncstn		chr1	172066013	172082795	-	4488	4914	4927	5263	1890	3283	4669	4152	4529	3645	3336	3216	3151	3489	4105	4447	2420	3026	3031
ENSMUSG00000026553	Copa		chr1	172082529	172122330	+	9801	9428	10117	11071	4744	7097	9423	9142	9336	8376	6945	7042	6735	7481	8926	9222	5081	6665	6309
ENSMUSG00000102779	Gm38164	pseudo_consens	chr1	172088474	172088803	+	5	8	0	7	29	3	1	4	0	2	0	6	4	0	0	2	23	2	4
ENSMUSG00000103380	Gm37756		chr1	172089910	172092679	-	5	0	2	0	1	1	5	0	0	0	0	4	2	0	1	1	2	2	5
ENSMUSG00000003464	Pex19		chr1	172126755	172136493	+	3559	3809	3930	4262	2166	2962	2701	2515	2785	2470	2364	2190	2103	3060	3806	3527	3396	3050	3119
ENSMUSG00000089803	Gm10171		chr1	172144274	172144901	-	4	7	0	2	1	2	6	1	1	13	2	3	1	0	2	1	1	1	2
ENSMUSG00000026554	Dcaf8		chr1	172148084	172197005	+	6076	5747	6006	7017	3636	4135	4862	4395	4876	4925	3631	3537	3669	4530	5283	5393	3600	3590	4555
ENSMUSG00000013698	Pea15a		chr1	172196728	172206804	-	4943	4711	5109	6165	2400	3492	3468	3081	3138	3269	2207	2214	2428	4012	4520	4539	3333	3340	4389
ENSMUSG00000007122	Casq1		chr1	172209894	172219868	-	3403	2677	2990	1855	5689	2275	1041	1262	1080	1296	733	641	1500	1350	1654	2146	2244	1945	1193
ENSMUSG00000092085	Gm17224		chr1	172213021	172213680	+	19	2	14	7	10	6	8	7	8	3	1	0	5	4	3	6	2	4	7
ENSMUSG00000007107	Atp1a4		chr1	172223513	172258414	-	8	5	6	4	6	4	0	0	2	0	0	0	0	1	11	9	1	5	8
ENSMUSG00000038034	Igsf8		chr1	172261641	172319841	+	2301	2483	2073	2764	1392	1521	2746	2737	2388	2672	2125	1793	1822	1863	2308	2163	1561	1530	1750
ENSMUSG00000007097	Atp1a2		chr1	172271709	172298064	-	14310	10803	12191	8423	14544	7613	4484	4678	5473	4832	3331	3383	5209	6726	6759	9777	9386	6957	6307
ENSMUSG00000038026	Kcnj9		chr1	172320501	172329318	-	20	3	4	12	9	7	21	3	10	0	12	6	0	6	18	12	2	2	5
ENSMUSG00000102413	Gm36937		chr1	172322994	172323661	+	0	0	0	0	0	2	0	4	0	0	0	0	0	0	0	0	0	0	1
ENSMUSG00000044708	Kcnj10		chr1	172341210	172374085	+	25	16	12	26	5	6	11	6	15	4	8	4	3	2	1	18	5	11	10
ENSMUSG00000050229	Pigm		chr1	172376546	172384099	+	1376	1456	1629	1758	572	869	1418	1551	1565	1444	1207	1236	1017	1106	1363	1414	599	912	1187
ENSMUSG00000102278	Gm37145		chr1	172388234	172390989	-	6	25	23	21	12	14	20	25	40	38	33	19	22	17	11	10	4	13	14
ENSMUSG00000103357	Gm7804	pseudo_consens	chr1	172458569	172474969	+	1	3	11	12	0	2	1	0	0	1	2	0	1	6	3	1	0	0	1
ENSMUSG00000026548	Slamf9		chr1	172475358	172478575	+	116	119	154	204	93	89	573	664	390	404	422	191	429	322	461	490	244	183	438
ENSMUSG00000037995	Igsf9		chr1	172481788	172498878	+	1288	1338	1582	1619	626	989	1633	1595	1567	1449	1100	1146	1135	1243	1571	1093	583	797	1205
ENSMUSG00000026547	Tagln2		chr1	172500047	172507380	+	4817	3918	4214	4501	2479	2719	8415	9688	8170	7798	8433	5862	5656	3191	5425	4399	4304	3924	2978
ENSMUSG00000104351	Gm37125		chr1	172513249	172514807	+	6	4	0	3	5	0	0	1	0	1	6	3	1	4	3	1	0	2	2
ENSMUSG00000026546	Cfap45		chr1	172520801	172545870	+	43	30	53	69	29	36	112	77	105	75	84	83	72	57	47	62	51	55	41
ENSMUSG00000085184	4933439K11Rik		chr1	172538133	172558129	-	27	24	42	37	11	21	96	87	70	68	61	71	67	35	35	26	11	25	28
ENSMUSG00000049598	Vsig8		chr1	172555938	172563717	+	4	9	30	16	172	38	5411	4261	5210	4175	2876	4414	2607	45	214	27	182	41	84
ENSMUSG00000053318	Slamf8		chr1	172581758	172590568	-	27	38	48	36	10	18	33	56	10	58	22	20	25	39	33	62	18	28	39
ENSMUSG00000070504	Fcrl6		chr1	172596642	172602551	-	0	0	0	0	0	0	0	2	0	0	0	0	0	1	0	0	0	1	1
ENSMUSG00000026544	Dusp23		chr1	172630764	172632962	-	245	230	242	325	280	170	218	184	181	209	128	125	158	194	182	199	293	171	210
ENSMUSG00000060128	Gm2710	pseudo_consens	chr1	172669034	172669636	-	0	0	1	2	7	2	3	3	0	4	4	5	0	0	3	0	4	3	3
ENSMUSG00000037942	Crp		chr1	172698055	172833031	+	5	0	13	7	3	4	0	0	2	0	0	0	1	3	0	0	2	8	5
ENSMUSG00000102701	9430083B18Rik		chr1	172873551	172874413	+	0	0	1	0	1	0	0	0	8	0	1	0	0	0	0	0	0	1	0
ENSMUSG00000037924	Olfr16		chr1	172950409	172958357	+	0	0	0	3	0	0	0	0	0	0	0	7	0	0	3	0	0	0	0
ENSMUSG00000005339	Fcer1a		chr1	173221284	173227214	-	92	30	49	109	15	41	136	134	201	188	68	97	123	36	113	142	18	70	75
ENSMUSG00000037872	Ackr1	overlapping_locus	chr1	173331886	173333750	-	542	585	687	684	423	453	441	460	427	436	422	406	359	379	644	475	603	517	570
ENSMUSG00000005338	Cadm3	overlapping_locus	chr1	173333258	173367695	-	3156	2610	3502	3885	1309	2160	2021	2088	1966	1791	1527	1390	1599	1932	2890	2622	1791	2182	2556
ENSMUSG00000037860	Aim2		chr1	173350879	173466040	+	207	207	257	269	95	139	489	394	296	441	396	432	315	200	238	267	96	207	262
ENSMUSG00000037849	Ifi206		chr1	173468485	173491041	-	5	4	11	0	0	2	27	40	21	16	21	6	13	17	18	25	2	3	22
ENSMUSG00000070501	Ifi214		chr1	173519717	173535957	-	0	0	0	0	0	0	0	7	0	1	1	2	1	0	0	10	0	0	0
ENSMUSG00000073491	Ifi213		chr1	173566283	173599274	-	17	21	16	34	7	6	83	63	65	58	66	22	48	50	35	103	7	13	76
ENSMUSG00000043263	Ifi209		chr1	173630917	173647928	+	34	55	76	71	8	29	97	121	78	140	127	36	95	83	88	189	13	49	111
ENSMUSG00000066677	Ifi208		chr1	173673675	173698395	+	14	9	10	21	7	5	18	17	25	41	35	11	22	20	53	60	6	14	29
ENSMUSG00000103105	Gm18752		chr1	173701385	173706407	+	0	0	0	0	0	0	3	0	0	0	0	1	0	0	5	0	0	0	1
ENSMUSG00000073490	Ifi207		chr1	173723427	173741747	-	460	349	466	447	165	275	469	460	477	551	440	316	398	405	721	587	157	447	633
ENSMUSG00000073489	Ifi204		chr1	173747293	173766943	-	237	190	300	220	140	112	397	470	519	473	464	265	404	241	467	573	92	289	452
ENSMUSG00000090222	Ifi203-ps		chr1	173776529	173798270	-	92	47	70	77	48	38	91	67	58	52	43	47	33	70	88	96	12	40	73
ENSMUSG00000102187	Gm7897		chr1	173829799	173832254	-	1	0	4	4	0	2	8	0	0	0	0	1	1	0	4	0	1	0	1
ENSMUSG00000090272	Mndal		chr1	173849126	173880881	-	244	232	351	316	126	105	400	326	395	355	217	173	274	333	383	427	69	175	453
ENSMUSG00000026536	Ifi211		chr1	173896345	173913046	-	61	42	53	75	44	40	98	72	67	104	99	58	59	50	85	97	23	62	91
ENSMUSG00000039997	Ifi203		chr1	173920407	173942672	-	393	351	495	461	204	197	534	453	400	592	374	279	354	519	559	606	145	301	715
ENSMUSG00000026535	Ifi202b		chr1	173962568	173982744	-	326	381	391	415	152	243	265	276	276	194	146	200	242	302	433	406	87	153	294
ENSMUSG00000103588	Gm18445		chr1	173986926	174001972	-	3	0	0	1	3	0	7	0	4	3	1	1	3	1	0	38	0	1	3
ENSMUSG00000054203	Ifi205		chr1	174011998	174031810	-	160	56	135	89	36	58	41	77	88	95	92	85	95	48	55	107	12	144	82
ENSMUSG00000045381	Olfr433		chr1	174040705	174044411	+	0	0	0	0	0	1	1	0	0	1	0	1	0	0	0	0	0	0	0
ENSMUSG00000047048	Olfr432	overlapping_locus	chr1	174049205	174054752	+	0	0	0	3	0	0	0	3	0	0	0	0	2	0	0	0	0	1	0
ENSMUSG00000026532	Spta1		chr1	174172776	174248450	+	3	5	4	1	0	0	4	2	10	7	0	9	5	1	9	12	1	26	5
ENSMUSG00000028354	Fmn2		chr1	174501825	174822729	+	63	24	48	64	11	32	25	29	35	31	17	20	13	26	40	34	20	26	27
ENSMUSG00000050069	Grem2		chr1	174833785	174921819	-	78	106	140	93	64	91	132	112	101	145	127	99	115	67	85	81	51	84	76
ENSMUSG00000026527	Rgs7		chr1	175059087	175492500	-	19	32	18	17	8	4	10	11	5	6	0	3	6	11	7	19	5	6	25
ENSMUSG00000103079	Gm36307		chr1	175574309	175578425	+	1	0	0	0	0	2	5	5	0	0	0	0	0	0	0	0	0	0	0
ENSMUSG00000026526	Fh1		chr1	175600374	175625635	-	2064	2210	2090	2137	1312	1541	2186	2087	2112	1987	1837	1591	1631	1585	1801	2019	1362	1484	1608
ENSMUSG00000039783	Kmo		chr1	175620381	175662116	+	118	104	119	144	31	61	49	37	39	84	70	39	27	50	100	100	44	67	107
ENSMUSG00000026525	Opn3	overlapping_locus	chr1	175662421	175692776	-	57	19	63	48	31	26	28	29	29	13	24	29	27	42	35	44	13	29	33
ENSMUSG00000078185	Chml	overlapping_locus	chr1	175682237	175692901	-	724	668	850	747	269	443	546	496	490	494	373	434	319	592	691	559	121	403	568
ENSMUSG00000039748	Exo1	ncRNA_host	chr1	175880581	175913489	+	160	121	110	195	71	106	251	227	233	291	255	177	134	84	134	95	89	77	72
ENSMUSG00000104158	Gm38100		chr1	175920329	175922225	+	0	0	0	0	1	0	3	0	0	3	0	1	0	0	0	0	0	1	0
ENSMUSG00000055214	Pld5	overlapping_locus	chr1	175962306	176275312	-	3	15	12	8	2	4	4	11	1	11	0	3	4	4	10	4	0	5	10
ENSMUSG00000078184	Rbm8a2	overlapping_locus	chr1	175977777	175979114	-	2	4	7	2	6	3	4	0	3	4	5	3	6	1	0	0	2	5	7
ENSMUSG00000104157	Gm38101		chr1	176276213	176279769	+	0	0	1	3	0	5	0	0	0	0	0	0	0	0	0	0	0	0	2
ENSMUSG00000057335	Cep170	ncRNA_host	chr1	176733653	176814067	-	1000	716	1066	1116	398	514	657	710	705	714	520	463	534	854	837	997	248	612	828
ENSMUSG00000103634	3110062G12Rik		chr1	176745564	176746982	-	0	0	2	3	0	1	1	0	0	0	0	0	1	0	0	1	0	1	5
ENSMUSG00000104154	Gm38104		chr1	176751521	176753415	-	14	1	13	1	10	2	10	0	8	12	1	4	2	0	11	14	13	4	10
ENSMUSG00000103435	Gm36992		chr1	176754517	176758876	+	5	1	1	1	2	2	0	1	0	0	0	2	0	1	0	2	0	2	4
ENSMUSG00000026504	Sdccag8	overlapping_locus	chr1	176814660	177020437	+	447	403	506	534	332	318	390	299	330	322	298	260	277	347	348	420	239	328	442
ENSMUSG00000103367	Gm38158	overlapping_locus	chr1	176835724	176836062	+	68	51	53	82	42	47	43	55	43	45	48	25	30	42	91	92	28	65	82
ENSMUSG00000093132	Gm25993		chr1	176879834	176879913	+	0	5	0	0	0	0	0	0	0	0	0	0	0	0	0	0	0	0	3
ENSMUSG00000102211	Gm37490		chr1	176889507	176890230	+	21	1	8	12	17	3	7	4	4	2	6	4	12	4	6	11	5	4	9
ENSMUSG00000087082	Gm15423		chr1	176927999	176932711	-	1	0	0	1	3	2	5	0	0	0	0	1	0	0	0	0	0	0	0
ENSMUSG00000103251	Gm37519		chr1	176974236	176976445	+	5	4	12	1	55	5	0	1	2	8	8	5	9	0	1	2	21	4	9
ENSMUSG00000019699	Akt3		chr1	177020073	177258203	-	755	553	953	852	333	449	562	597	553	573	333	311	456	541	599	646	335	486	718
ENSMUSG00000104391	Gm37960		chr1	177035040	177036936	-	17	2	11	0	3	3	4	0	3	8	1	0	2	1	7	0	1	1	2
ENSMUSG00000102133	Gm37106		chr1	177045242	177046773	-	1	0	4	1	21	0	1	0	1	1	2	2	1	1	8	0	0	0	0
ENSMUSG00000102749	Gm37598		chr1	177074484	177075784	-	0	0	1	0	7	0	0	1	0	0	0	0	0	0	0	0	9	0	0
ENSMUSG00000103646	Gm37706		chr1	177168098	177170862	-	4	1	15	4	26	1	7	3	2	1	0	1	8	1	3	0	8	2	2
ENSMUSG00000102427	Gm37463		chr1	177229891	177230686	-	0	1	0	0	1	0	0	0	3	1	0	0	0	2	0	0	0	1	1
ENSMUSG00000103633	Gm38328	pseudo_consens	chr1	177269352	177269668	+	0	0	1	0	0	0	0	0	0	0	0	0	0	0	0	0	0	0	1
ENSMUSG00000097892	Gm26801		chr1	177428338	177443270	-	2	3	3	1	2	3	4	2	3	0	2	0	2	5	0	2	1	2	1
ENSMUSG00000063659	Zbtb18		chr1	177442351	177450764	+	1226	1224	1348	1297	756	866	1187	1156	1013	1066	840	872	711	1008	1192	1007	383	798	930
ENSMUSG00000102432	Gm29856		chr1	177458966	177461204	+	0	0	3	0	0	1	2	0	0	0	0	0	0	0	0	0	0	1	2
ENSMUSG00000103043	Gm37306		chr1	177467378	177476267	+	0	0	0	0	0	1	0	1	0	0	0	1	0	0	0	0	0	1	3
ENSMUSG00000103767	Gm37858		chr1	177635707	177636937	-	0	1	3	3	1	2	1	0	0	0	2	0	2	1	0	0	0	1	0
ENSMUSG00000101746	2310043L19Rik		chr1	177641542	177642943	-	0	3	0	0	0	1	1	0	1	0	1	3	0	0	0	1	1	0	0
ENSMUSG00000015962	1700016C15Rik		chr1	177729814	177753324	+	5	5	8	6	7	4	4	3	1	5	1	2	1	2	3	4	6	3	3
ENSMUSG00000015961	Adss		chr1	177762962	177796511	-	2959	2887	2785	3190	1387	1767	2469	2293	2550	2202	2030	1676	1791	2013	2430	2362	1146	1609	1892
ENSMUSG00000089657	Gm16585	pseudo_consens	chr1	177786856	177787465	+	1	2	3	2	0	1	2	3	2	1	4	1	3	2	3	3	4	0	5
ENSMUSG00000102483	Catspere1		chr1	177808431	177962678	+	0	0	0	0	0	0	0	0	0	0	2	2	0	0	2	0	0	0	0
ENSMUSG00000091476	Catspere2	overlapping_locus	chr1	177983423	178172705	+	23	36	32	46	5	14	29	9	13	10	11	15	9	25	30	13	10	13	18
ENSMUSG00000104097	Gm37313	pseudo_consens	chr1	177989662	177998739	-	5	12	18	20	13	16	17	21	20	0	12	13	12	3	12	10	3	19	23
ENSMUSG00000102493	Gm8010	overlapping_locus	chr1	178143301	178144272	+	0	0	2	0	0	0	4	2	0	0	1	2	1	2	0	0	0	0	4
ENSMUSG00000026502	Desi2		chr1	178187417	178257301	+	1250	1159	1459	1334	561	875	1362	1586	1456	1335	1233	1229	1001	1082	1399	1131	527	960	1001
ENSMUSG00000103958	Gm8023	pseudo_consens	chr1	178266204	178267106	+	0	0	0	0	0	0	0	0	0	0	1	0	0	1	0	0	0	0	0
ENSMUSG00000070489	4930527J03Rik	reference_genome_error	chr1	178276047	178276641	-	2	0	0	4	1	3	5	5	1	1	0	0	0	0	0	0	0	1	0
ENSMUSG00000104126	Gm37486	pseudo_consens	chr1	178299396	178299800	+	26	16	17	26	7	15	19	15	19	20	25	11	11	29	23	28	13	11	11
ENSMUSG00000086350	B230369F24Rik		chr1	178313328	178318549	-	27	39	52	46	26	16	42	25	17	39	14	11	18	35	49	44	18	20	36
ENSMUSG00000026500	Cox20		chr1	178319130	178322693	+	62	78	50	92	62	42	56	47	38	47	61	34	38	64	64	61	34	30	61
ENSMUSG00000039630	Hnrnpu	overlapping_locus	chr1	178321108	178337797	-	16991	14575	17111	17877	8663	11232	17117	17256	16953	16653	14083	13240	12378	13487	16264	15202	6198	11110	13372
ENSMUSG00000104279	Gm38300		chr1	178339601	178341470	+	59	41	33	41	39	20	38	50	54	24	28	21	19	33	37	35	37	23	34
ENSMUSG00000026495	Efcab2		chr1	178406085	178484513	+	276	292	316	298	330	161	113	154	132	147	90	83	138	152	205	251	115	154	178
ENSMUSG00000026494	Kif26b	ncRNA_host	chr1	178529125	178939200	+	300	227	268	362	111	172	1090	836	973	773	760	667	592	265	385	321	196	207	185
ENSMUSG00000064967	Gm24405		chr1	178636905	178637071	+	0	0	0	2	0	0	0	0	0	0	1	0	0	0	0	0	0	0	0
ENSMUSG00000055067	Smyd3		chr1	178951960	179518041	-	674	656	580	765	286	454	581	403	501	516	407	421	340	370	455	569	376	414	415
ENSMUSG00000096474	Gm5561		chr1	179520378	179520857	-	4	7	0	4	1	5	4	3	0	1	0	3	5	1	3	0	3	2	1
ENSMUSG00000026492	Tfb2m		chr1	179528055	179546267	-	404	351	412	421	164	251	405	345	380	338	225	248	225	227	381	336	117	226	287
ENSMUSG00000082395	Gm15480	pseudo_consens	chr1	179538417	179538935	+	6	1	9	7	0	1	5	0	3	8	0	1	2	4	10	3	5	2	6
ENSMUSG00000038949	Cnst		chr1	179546370	179627478	+	3272	2966	3388	3640	1513	2289	2186	2263	2328	2138	1545	1939	1788	2677	3060	2872	1309	1745	2355
ENSMUSG00000038936	Sccpdh		chr1	179668210	179687189	+	1521	1765	1417	1780	1166	1532	533	443	560	465	547	532	470	712	687	990	1165	946	766
ENSMUSG00000087236	Kif28	overlapping_locus	chr1	179695297	179745271	-	2	15	8	3	24	7	0	8	3	2	3	2	4	3	5	7	6	5	7
ENSMUSG00000026491	Ahctf1	overlapping_locus	chr1	179744894	179803680	-	3010	2768	3085	2920	1249	1862	2679	2518	2766	2616	2037	2154	1895	2122	2706	2531	922	1765	2035
ENSMUSG00000104418	Gm37070	pseudo_consens	chr1	179924952	179925411	-	1	5	0	1	3	2	0	0	0	0	1	0	1	0	0	0	1	4	1
ENSMUSG00000026490	Cdc42bpa		chr1	179960472	180165603	+	3444	2874	3491	3661	1407	2247	2337	2255	2527	2188	1578	1705	1549	2244	2669	2798	1282	1971	2039
ENSMUSG00000102194	Gm38169		chr1	180021062	180023600	+	0	2	0	4	1	0	0	0	0	1	0	1	2	0	0	4	0	0	0
ENSMUSG00000103636	Gm38331		chr1	180145481	180148151	-	3	2	3	5	7	3	3	3	4	2	1	3	1	7	10	7	0	1	4
ENSMUSG00000026489	Coq8a		chr1	180165238	180199602	-	6240	4741	4748	4209	5295	2879	2079	2093	3002	2319	1584	1546	2322	3005	3077	4492	3831	2831	2226
ENSMUSG00000104520	Gm37336		chr1	180202303	180212401	-	12	6	16	13	4	9	12	2	3	1	7	7	3	1	2	0	4	2	5
ENSMUSG00000010609	Psen2		chr1	180227004	180263438	-	723	610	707	856	474	433	562	417	543	492	466	410	382	440	674	618	562	498	568
ENSMUSG00000102923	Gm31728		chr1	180256429	180274963	+	5	3	7	14	10	5	4	2	5	6	3	5	1	0	1	4	2	5	6
ENSMUSG00000055676	Gm5069	pseudo_consens	chr1	180326970	180330550	-	71	26	46	38	16	22	32	52	32	17	24	17	39	27	38	41	25	20	29
ENSMUSG00000038855	Itpkb		chr1	180330485	180424802	+	8416	7448	8233	8016	2607	4723	4550	5137	4475	3852	3149	3399	3422	5009	5421	5952	2843	3756	4181
ENSMUSG00000104388	Gm37033		chr1	180357649	180364998	+	10	22	4	16	99	14	21	4	11	4	15	7	6	12	17	9	46	12	19
ENSMUSG00000103123	Gm37390		chr1	180372669	180373540	+	0	0	0	5	4	0	0	0	0	10	1	0	2	7	0	0	4	0	0
ENSMUSG00000103772	Gm36933		chr1	180376444	180379514	+	0	2	3	0	2	0	0	1	0	0	0	1	0	8	0	4	4	0	0
ENSMUSG00000053963	Stum		chr1	180432387	180483504	-	69	57	96	38	55	35	35	25	37	32	38	31	34	38	52	57	35	25	30
ENSMUSG00000102608	Gm37267		chr1	180508778	180519727	-	3	1	8	9	1	0	2	0	0	5	2	1	3	7	3	2	4	5	3
ENSMUSG00000026496	Parp1	ncRNA_host	chr1	180568924	180601254	+	1656	1502	1465	1888	795	1062	1729	1545	1543	1555	1324	1004	1086	1280	1486	1419	782	900	1079
ENSMUSG00000098926	Mir6904		chr1	180587201	180587267	+	0	1	0	0	0	0	0	0	0	0	0	0	0	0	0	0	0	0	1
ENSMUSG00000058729	Lin9		chr1	180641150	180690694	+	245	250	281	259	127	162	351	328	361	345	308	328	277	244	297	240	102	203	212
ENSMUSG00000026497	Mixl1		chr1	180693043	180697034	-	0	0	0	0	0	0	0	1	0	0	0	0	1	0	3	0	0	0	0
ENSMUSG00000104202	Gm8101	pseudo_consens	chr1	180721614	180722091	+	0	0	0	1	0	0	0	0	0	0	1	1	0	0	0	0	0	0	0
ENSMUSG00000026499	Acbd3		chr1	180726043	180754204	+	2444	2265	2247	2724	1414	1586	2302	2401	2219	2037	1611	1754	1638	2093	2253	2221	936	1447	1825
[truncated: 30,777 more rows]

## Sheet: Filtered_Counts
gene_id	gene_name	tag	seqnames	start	end	strand	CTRL_m17	CTRL_m18	CTRL_m19	CTRL_m20	CTRL_m3	CTRL_m6	IMQ_treat_m9	IMQ_treat_m11	IMQ_treat_m13	IMQ_treat_m15	IMQ_treat_m2	IMQ_treat_m4	IMQ_treat_m7	IMQ_un_m10	IMQ_un_m12	IMQ_un_m14	IMQ_un_m1	IMQ_un_m5	IMQ_un_m8
ENSMUSG00000025900	Rp1	overlapping_locus	chr1	3999557	4409241	-	93	97	101	68	77	54	39	25	35	24	26	41	44	79	39	47	61	42	36
ENSMUSG00000025902	Sox17		chr1	4490931	4497354	-	289	228	342	314	119	146	208	150	175	175	96	128	164	166	188	233	114	123	160
ENSMUSG00000033845	Mrpl15		chr1	4773206	4785739	-	1065	1123	965	1076	724	767	1261	1187	1042	1183	1052	926	845	812	1100	973	855	800	896
ENSMUSG00000102275	Gm37144		chr1	4778063	4779212	-	37	36	36	63	40	24	47	78	26	47	32	31	34	47	52	44	18	39	57
ENSMUSG00000025903	Lypla1	overlapping_locus	chr1	4807788	4848410	+	2121	2232	2162	2295	945	1554	2241	2075	2126	2044	1872	1823	1593	1740	2177	1796	789	1532	1813
ENSMUSG00000033813	Tcea1	overlapping_locus	chr1	4857814	4897909	+	1565	1429	1596	1535	601	947	1283	1234	1210	1221	1077	995	938	1023	1348	1150	485	1005	1108
ENSMUSG00000103280	Gm37277		chr1	4905751	4906861	-	63	58	46	42	13	22	89	103	89	62	72	99	66	50	50	49	7	26	40
ENSMUSG00000002459	Rgs20	overlapping_locus	chr1	4909576	5070285	-	306	343	395	321	109	236	527	477	443	339	389	401	367	302	373	391	134	243	261
ENSMUSG00000033793	Atp6v1h		chr1	5070018	5162529	+	2530	2577	2543	2516	1367	1814	2559	2697	2520	2280	2129	2141	2016	1935	2416	2422	1485	1945	1789
ENSMUSG00000033774	Npbwr1		chr1	5913707	5917398	-	425	550	503	500	234	505	616	588	485	594	373	603	463	541	603	460	247	538	336
ENSMUSG00000025907	Rb1cc1		chr1	6206197	6276648	+	4447	3962	4965	4653	1648	2992	4371	3766	4019	3933	2680	3396	3018	3532	4485	3916	847	2496	3463
ENSMUSG00000090031	4732440D04Rik		chr1	6209866	6215293	-	349	410	414	434	180	319	445	367	329	403	266	339	272	423	491	377	75	289	437
ENSMUSG00000033740	St18		chr1	6487231	6860940	+	14	18	42	9	9	9	31	16	36	25	27	30	16	19	40	28	9	34	27
ENSMUSG00000051285	Pcmtd1	overlapping_locus	chr1	7088920	7173628	+	4228	3783	4284	4413	1872	2549	3035	2535	2987	2694	1833	2244	2258	3112	3369	3329	848	2140	3082
ENSMUSG00000103509	Gm38372		chr1	7148110	7152137	+	79	56	166	259	24	50	113	64	109	148	91	79	40	134	185	114	14	74	198
ENSMUSG00000097797	Gm26901		chr1	7349406	7397869	-	28	44	53	57	26	48	42	40	41	26	33	22	29	11	36	33	12	27	40
ENSMUSG00000061024	Rrs1		chr1	9545408	9547455	+	1122	1252	1001	1283	707	782	1379	1804	1465	1372	1453	1235	1024	799	1267	1166	745	916	735
ENSMUSG00000025911	Adhfe1	overlapping_locus	chr1	9547948	9580673	+	432	308	338	357	194	165	157	116	182	171	87	122	142	236	205	280	126	182	240
ENSMUSG00000079671	2610203C22Rik		chr1	9560832	9631175	-	64	55	68	116	43	50	113	64	86	84	71	69	58	69	116	93	24	65	99
ENSMUSG00000025912	Mybl1		chr1	9667415	9700209	-	201	212	202	276	101	157	151	165	164	171	155	158	94	128	162	146	48	160	139
ENSMUSG00000045210	Vcpip1		chr1	9718622	9748382	-	1307	1066	1306	1382	551	789	1170	1170	1179	980	850	852	806	962	1161	1143	395	805	1002
ENSMUSG00000025915	Sgk3		chr1	9798107	9900845	+	1629	1522	1724	1904	728	1075	1897	1549	1719	1684	1298	1226	1089	1250	1672	1349	509	995	1349
ENSMUSG00000098234	Snhg6	overlapping_locus	chr1	9941959	9944118	-	369	495	450	526	282	304	503	451	463	516	418	406	353	301	491	469	208	311	406
ENSMUSG00000099032	Tcf24		chr1	9960163	9967932	-	38	29	27	77	24	53	54	30	42	74	23	42	44	77	114	78	43	74	79
ENSMUSG00000025917	Cops5		chr1	10024601	10038168	-	2602	3096	2738	2817	1959	2057	3028	3261	2961	2987	2714	2657	2246	2267	2797	2619	1695	2243	2303
ENSMUSG00000056763	Cspp1		chr1	10037987	10136768	+	950	903	1078	1244	618	709	1051	855	1033	989	622	786	600	861	1029	960	275	591	834
ENSMUSG00000067851	Arfgef1	overlapping_locus	chr1	10137571	10232670	-	3822	3440	4226	3899	1388	2760	4026	4290	4139	3910	3024	3432	2771	3294	3864	3581	1060	2629	2797
ENSMUSG00000048960	Prex2		chr1	10993465	11303681	+	904	516	842	871	254	374	428	327	459	445	272	285	271	478	549	534	163	404	468
ENSMUSG00000016918	Sulf1		chr1	12692277	12861192	+	687	479	704	670	322	349	395	364	337	441	294	237	323	410	377	467	262	365	446
ENSMUSG00000025938	Slco5a1		chr1	12866549	12992650	-	429	310	380	280	324	200	308	344	329	355	218	257	237	227	229	358	138	165	163
ENSMUSG00000005886	Ncoa2	overlapping_locus	chr1	13139105	13374083	-	3863	3102	3754	4254	1212	2529	3181	3350	3553	3151	2228	2656	2244	2740	3209	3199	1003	2156	2464
ENSMUSG00000025935	Tram1		chr1	13564698	13589910	-	2868	2728	2898	2951	1316	1869	3086	2948	2748	2840	2410	2330	2162	2257	2680	2454	1520	2043	2322
ENSMUSG00000025937	Lactb2	overlapping_locus	chr1	13623330	13660546	-	754	820	783	811	379	473	731	824	734	749	521	531	554	678	780	693	280	461	664
ENSMUSG00000025932	Eya1	overlapping_locus	chr1	14168954	14310235	-	151	118	148	96	123	80	50	43	54	76	34	50	61	98	75	98	54	79	91
ENSMUSG00000025925	Terf1		chr1	15805646	15844052	+	420	382	386	457	310	265	516	401	427	477	399	339	358	299	473	340	139	266	368
ENSMUSG00000032719	Sbspon		chr1	15853862	15892722	-	67	63	41	63	24	28	29	7	25	45	15	5	17	46	20	31	30	18	24
ENSMUSG00000043716	Rpl7		chr1	16101295	16104662	-	21945	25940	22140	25629	12890	14615	24659	22328	22367	22711	21036	18453	18472	17170	21995	20938	15846	16108	21267
ENSMUSG00000025921	Rdh10		chr1	16105774	16133734	+	851	948	898	1049	387	647	930	982	1070	900	705	866	663	745	1058	915	479	665	737
ENSMUSG00000025920	Stau2		chr1	16228674	16520112	-	888	920	881	867	560	632	587	705	649	561	496	493	518	586	819	789	473	601	547
ENSMUSG00000025939	Ube2w		chr1	16540790	16619489	-	844	855	877	948	476	569	734	758	590	619	562	573	547	746	871	703	305	524	685
ENSMUSG00000079658	Eloc		chr1	16641725	16657042	-	1739	1756	1672	1735	1222	1142	1566	1554	1599	1436	1400	1341	1233	1038	1564	1423	687	994	1213
ENSMUSG00000025940	Tmem70		chr1	16665207	16678275	+	851	757	731	800	564	532	803	732	784	660	668	576	618	608	718	646	413	541	653
ENSMUSG00000025779	Ly96		chr1	16688051	16709611	+	87	80	99	82	43	48	112	153	89	97	98	105	91	81	107	92	37	75	95
ENSMUSG00000042686	Jph1		chr1	16964560	17097889	-	923	589	728	499	899	460	281	288	298	330	188	215	353	428	448	608	348	411	316
ENSMUSG00000067780	Pi15		chr1	17601901	17630939	+	201	85	202	287	95	134	450	323	320	495	654	360	212	108	127	92	42	105	98
ENSMUSG00000100053	Gm28154		chr1	17615084	17641081	-	59	28	54	31	63	30	23	20	26	21	24	8	26	34	32	35	12	22	41
ENSMUSG00000085125	Gm16070		chr1	17676027	17727646	-	53	44	42	36	29	16	15	22	16	27	9	10	19	33	30	27	15	13	32
ENSMUSG00000025776	Crispld1		chr1	17727045	17766344	+	1711	1339	1581	1814	736	820	598	605	1072	820	437	342	484	898	870	1022	445	623	764
ENSMUSG00000025927	Tfap2b		chr1	19208914	19238576	+	3556	3778	3881	4507	1680	2364	2365	1896	2298	2302	1296	1563	1593	2635	3181	3074	1705	1600	2436
ENSMUSG00000099906	Gm28653	ncRNA_host	chr1	20669882	20684298	+	81	52	57	70	101	50	47	36	43	33	24	41	34	39	58	50	14	51	39
ENSMUSG00000025929	Il17a		chr1	20730905	20734496	+	0	0	0	0	1	0	56	56	13	54	46	39	33	11	42	0	5	12	2
ENSMUSG00000041872	Il17f		chr1	20777146	20790617	-	2	7	7	5	2	5	87	59	40	87	85	49	46	25	40	9	8	23	10
ENSMUSG00000041859	Mcm3		chr1	20802968	20820312	-	970	1023	907	1280	598	695	1907	1833	1527	1838	1576	943	1095	842	1035	977	725	689	543
ENSMUSG00000025931	Paqr8		chr1	20890606	20939650	+	666	544	524	598	182	295	496	463	435	454	277	367	371	387	369	369	113	237	327
ENSMUSG00000041809	Efhc1		chr1	20951626	20990841	+	47	43	87	88	22	37	54	41	23	38	25	19	32	32	64	52	28	30	65
ENSMUSG00000041779	Tram2		chr1	20996299	21079229	-	812	645	948	928	372	528	558	553	643	538	446	405	428	598	768	696	438	504	581
ENSMUSG00000025933	Tmem14a		chr1	21218575	21230167	+	81	108	116	123	50	55	61	39	85	49	41	38	47	84	66	97	38	47	68
ENSMUSG00000025934	Gsta3		chr1	21240589	21265661	+	2119	922	774	2135	270	510	398	361	1250	452	118	215	315	632	879	1598	325	452	817
ENSMUSG00000028033	Kcnq5	overlapping_locus	chr1	21398403	21961942	-	173	90	145	80	155	99	53	38	60	46	34	27	57	93	77	75	62	101	53
ENSMUSG00000097970	Gm27028	ncRNA_host	chr1	23291537	23291935	+	40	62	41	31	35	30	25	23	43	32	12	21	25	29	41	29	5	20	32
ENSMUSG00000026158	Ogfrl1		chr1	23366424	23397772	-	1376	1418	1327	1504	960	923	970	964	901	844	749	679	718	974	1165	1250	673	746	1083
ENSMUSG00000026156	B3gat2		chr1	23761753	23849158	+	126	139	145	177	60	80	91	80	119	129	86	111	72	82	104	115	36	88	108
ENSMUSG00000026155	Smap1		chr1	23844846	23922317	-	1309	1317	1213	1425	907	938	1565	1546	1589	1404	1397	1217	1182	1014	1329	1180	809	974	881
ENSMUSG00000026154	Sdhaf4		chr1	23995939	24005656	-	331	309	235	356	267	207	251	204	222	235	209	198	174	224	292	304	217	200	251
ENSMUSG00000026153	Fam135a		chr1	24011093	24100341	-	3652	3336	4160	4130	1566	2752	4529	4944	4465	4118	3323	4119	3088	3201	4481	3474	862	2763	3174
ENSMUSG00000026147	Col9a1		chr1	24177610	24252684	+	1505	1281	1367	2042	893	764	419	334	485	372	312	167	246	888	833	1068	609	495	588
ENSMUSG00000073725	Lmbrd1		chr1	24678630	24766301	+	2879	2520	2850	2743	1423	1777	1963	2087	2204	1742	1574	1632	1548	1942	2332	2246	1326	1757	1997
ENSMUSG00000048874	Phf3	overlapping_locus	chr1	30802339	30873921	-	3099	2562	3003	3434	1537	2026	2584	2670	2636	2594	1963	2027	1889	2358	2881	2677	1217	1983	2303
ENSMUSG00000026064	Ptp4a1		chr1	30940302	30949309	-	34	22	60	36	9	21	34	32	61	24	9	22	19	36	23	27	10	20	31
ENSMUSG00000026134	Prim2	overlapping_locus	chr1	33453810	33669795	-	323	422	302	417	179	269	375	410	406	472	446	291	276	192	302	293	193	264	202
ENSMUSG00000004768	Rab23		chr1	33719887	33742564	+	673	643	735	862	382	540	536	557	462	542	478	413	355	497	680	635	359	480	499
ENSMUSG00000042215	Bag2		chr1	33745484	33757795	-	322	276	272	311	130	199	332	333	398	319	282	291	200	192	269	230	219	179	176
ENSMUSG00000042197	Zfp451		chr1	33761545	33814595	-	1385	1165	1401	1526	663	924	1205	1266	1080	1079	838	884	820	1205	1200	992	464	872	1088
ENSMUSG00000042182	Bend6	overlapping_locus	chr1	33852052	33907816	-	52	36	33	58	19	12	33	13	47	21	19	17	15	18	32	44	4	20	37
ENSMUSG00000026131	Dst	overlapping_locus	chr1	33908225	34308661	+	46374	38856	46012	50111	16999	26608	28260	21876	27741	24720	13893	15807	22325	38582	37738	39945	17189	22483	33460
ENSMUSG00000096992	Gm26788		chr1	34165856	34178446	-	903	769	1132	1374	230	445	421	313	405	348	153	236	317	837	932	724	136	326	1022
ENSMUSG00000102336	Gm37233	ncRNA_host	chr1	34427002	34433264	-	36	26	36	57	6	22	42	47	33	52	20	21	22	53	58	57	10	30	52
ENSMUSG00000042111	Ccdc115		chr1	34436670	34439672	-	1121	1101	967	1137	673	733	915	960	954	949	893	803	687	765	1080	973	513	728	883
ENSMUSG00000026127	Imp4		chr1	34439851	34449356	+	1407	1377	1414	1534	823	968	1647	1460	1351	1345	1312	1145	1062	1106	1414	1186	989	1053	1028
ENSMUSG00000026126	Ptpn18		chr1	34459762	34475733	+	195	189	207	313	127	151	277	237	218	280	181	156	198	238	253	323	213	231	386
ENSMUSG00000100280	Gm28417		chr1	34468834	34473148	-	16	28	28	38	27	36	46	21	34	34	19	25	28	35	60	47	19	22	67
ENSMUSG00000037509	Arhgef4	overlapping_locus	chr1	34678188	34813309	+	1963	2220	2271	2463	678	1493	2485	2123	2299	2091	1682	1604	1405	1701	1930	2010	699	1117	1300
ENSMUSG00000104002	Gm38336		chr1	34809360	34811908	-	26	67	39	103	28	45	66	83	78	74	40	34	52	60	53	57	25	30	44
ENSMUSG00000037503	Fam168b		chr1	34813219	34843065	-	6858	6944	6946	7633	3179	4908	6161	5569	6182	5808	5011	4437	4149	5273	6501	6403	3518	4429	4982
ENSMUSG00000104358	Gm37127		chr1	34823525	34826560	+	57	23	30	57	8	35	42	33	29	43	18	29	19	39	35	47	6	15	41
ENSMUSG00000026123	Plekhb2		chr1	34849976	34879580	+	1519	1380	1383	1558	816	1124	2507	2729	2221	2363	2211	1942	1627	1400	1991	1797	953	1439	1392
ENSMUSG00000045216	Hs6st1		chr1	36068400	36106446	+	1991	2156	2348	2543	879	1391	2114	1911	2004	1791	1534	1477	1249	1755	1807	1856	1058	1345	1704
ENSMUSG00000037470	Uggt1	ncRNA_host	chr1	36140027	36244720	-	2898	2874	3001	2977	1544	1965	2674	2666	2760	2516	2142	1898	1963	2119	2612	2635	1571	1877	1846
ENSMUSG00000047180	Neurl3		chr1	36264597	36274679	-	353	399	394	370	187	193	265	216	172	242	285	187	225	163	274	310	183	257	355
ENSMUSG00000037447	Arid5a		chr1	36307733	36324029	+	670	554	623	736	417	416	539	598	478	505	414	330	392	554	626	596	449	432	541
ENSMUSG00000010453	Kansl3	ncRNA_host	chr1	36335730	36369181	-	3204	2907	3174	3719	1686	2181	2261	2335	2250	1946	1696	1769	1765	2402	2802	2723	1515	2038	2440
ENSMUSG00000037432	Fer1l5		chr1	36372291	36422110	+	144	179	198	213	97	118	124	169	116	128	94	87	107	222	201	186	71	121	212
ENSMUSG00000001143	Lman2l		chr1	36419871	36445271	-	1111	902	1080	1145	595	641	836	698	810	709	577	541	593	811	942	882	496	608	873
ENSMUSG00000037408	Cnnm4	ncRNA_host	chr1	36471620	36508764	+	1061	1094	1060	1132	523	847	831	1008	860	789	529	784	631	886	1080	1033	509	748	629
ENSMUSG00000104316	Gm37909		chr1	36473952	36476110	+	31	43	47	18	29	25	20	35	32	12	17	20	16	24	44	35	20	26	12
ENSMUSG00000001138	Cnnm3		chr1	36511867	36528237	+	1464	1360	1509	1683	705	988	1237	1170	1075	991	787	750	868	1144	1265	1402	838	777	1179
ENSMUSG00000067653	Ankrd23		chr1	36530188	36536883	-	535	407	465	334	563	232	172	139	164	161	104	109	182	216	228	337	217	258	238
ENSMUSG00000079610	Ankrd39	overlapping_locus	chr1	36537507	36547445	-	303	321	331	363	201	234	355	249	296	276	213	209	196	247	305	262	197	166	278
ENSMUSG00000026121	Sema4c		chr1	36548639	36558349	-	1712	1620	1844	2172	1044	1349	2401	2020	2100	1935	1684	1682	1363	1453	1842	1546	861	1138	1289
ENSMUSG00000087589	D430040D24Rik		chr1	36557701	36565613	+	172	198	192	181	127	138	156	145	115	159	126	122	109	130	195	160	103	116	149
ENSMUSG00000046337	Fam178b		chr1	36562692	36683183	-	152	184	124	166	123	105	155	45	145	90	103	80	70	132	117	139	146	91	86
ENSMUSG00000061518	Cox5b		chr1	36691449	36693681	+	2819	2734	2230	2905	2367	1710	3475	2737	2965	3179	2880	2131	2237	1795	2535	2448	2685	1824	2033
ENSMUSG00000037351	Actr1b		chr1	36698114	36714422	-	4031	3949	3549	4185	2162	2655	3724	3825	3723	3620	3116	2925	2746	2888	3329	3465	2302	2519	2878
ENSMUSG00000026117	Zap70		chr1	36761798	36782818	+	195	178	140	181	101	99	130	99	75	151	125	96	74	121	186	149	67	104	153
ENSMUSG00000026116	Tmem131	overlapping_locus	chr1	36792191	36943666	-	5393	5321	6040	6439	1890	4156	4950	4809	5087	4156	3364	3970	3598	4594	4539	5337	2297	3435	3484
ENSMUSG00000026113	Inpp4a		chr1	37299865	37410736	+	1298	1043	1296	1401	663	843	879	736	931	776	573	656	669	986	1157	1090	416	695	1044
ENSMUSG00000026112	Coa5		chr1	37417084	37430103	-	2778	2739	2964	2973	1524	2105	2711	2722	2669	2543	2232	2101	1909	2185	2786	2639	1714	2041	2258
ENSMUSG00000026111	Unc50		chr1	37430139	37439124	+	1709	2017	1647	2132	1017	1276	1366	1456	1469	1310	1205	1128	1111	1332	1700	1572	914	1149	1430
ENSMUSG00000026110	Mgat4a	overlapping_locus	chr1	37439340	37541016	-	746	649	811	878	328	478	633	671	820	702	466	529	517	543	566	634	310	468	596
ENSMUSG00000026090	2010300C02Rik	overlapping_locus	chr1	37611677	37720085	-	974	1035	892	1056	391	651	1436	1304	1713	1322	1093	891	846	666	1009	878	697	669	593
ENSMUSG00000060771	Tsga10		chr1	37754776	37866429	-	230	160	168	188	111	104	138	81	101	115	119	80	110	146	174	136	51	98	202
ENSMUSG00000037216	Lipt1		chr1	37871738	37876228	+	143	113	128	175	79	103	145	93	104	101	90	93	79	68	105	102	79	76	101
ENSMUSG00000026088	Mitd1		chr1	37874801	37890411	-	605	562	566	672	374	440	608	517	514	432	473	402	412	452	639	584	191	385	573
ENSMUSG00000026087	Mrpl30		chr1	37890477	37898535	+	1378	1497	1291	1411	954	896	1397	1347	1348	1280	1354	1137	1042	1027	1389	1352	1044	973	1160
ENSMUSG00000061584	Lyg2		chr1	37905923	37916493	-	0	1	0	0	7	15	1068	751	922	934	578	766	614	9	60	9	15	21	33
ENSMUSG00000058407	Txndc9		chr1	37985189	37997893	-	1572	1586	1608	1611	966	1054	1877	1729	1685	1583	1672	1576	1383	1292	1543	1544	864	1046	1304
ENSMUSG00000026083	Eif5b		chr1	37998010	38055579	+	5848	6481	5877	5751	7153	3851	6297	6669	5862	5845	5897	5331	5337	4255	5567	5222	4139	3976	4395
ENSMUSG00000026082	Rev1	overlapping_locus	chr1	38052786	38129801	-	919	902	1093	981	395	584	617	568	659	724	477	511	481	714	887	890	284	501	662
ENSMUSG00000037138	Aff3		chr1	38177326	38664955	-	3863	2142	2981	4402	706	1123	1014	879	1138	1475	560	508	751	1477	1554	1738	752	985	1571
ENSMUSG00000048814	Lonrf2		chr1	38793645	38836711	-	78	49	62	90	42	49	21	38	33	38	17	19	21	33	34	48	23	31	40
ENSMUSG00000026080	Chst10		chr1	38863867	38898161	-	138	75	113	108	65	72	67	54	55	72	60	40	51	67	67	89	71	53	99
ENSMUSG00000026078	Pdcl3		chr1	38985608	38997238	+	1689	1618	1500	1668	1243	1114	1442	1400	1281	1358	1249	1150	1081	1190	1453	1414	874	991	1298
ENSMUSG00000103046	Gm37309		chr1	38992678	38994316	+	106	87	132	113	55	76	77	62	107	97	81	70	57	73	123	82	24	66	111
ENSMUSG00000026077	Npas2	overlapping_locus	chr1	39193731	39363236	+	236	162	296	235	194	351	79	102	50	44	148	101	55	112	199	126	194	181	136
ENSMUSG00000073702	Rpl31		chr1	39367842	39371911	+	3996	4775	4606	5333	3208	3115	4130	3579	3520	4287	4026	3257	3518	3218	4451	4114	4059	3015	4559
ENSMUSG00000003134	Tbc1d8		chr1	39371492	39478755	-	1321	1260	1402	1449	588	1060	871	637	750	727	589	657	562	1032	1161	1147	523	619	1037
ENSMUSG00000003135	Cnot11		chr1	39534992	39546889	+	1133	1265	1090	1229	496	732	1072	1029	1136	1056	907	862	721	825	1025	959	624	712	694
ENSMUSG00000085894	Gm15832	overlapping_locus	chr1	39547570	39552002	-	102	108	128	153	95	77	94	106	86	122	85	102	60	72	95	105	37	62	118
ENSMUSG00000048234	Rnf149	overlapping_locus	chr1	39551296	39577405	-	1778	1878	1689	1821	794	1371	2049	2079	2558	2090	1759	1879	1611	1310	1827	1795	840	1180	1226
ENSMUSG00000026074	Map4k4		chr1	39900913	40026310	+	8265	7555	8532	9472	4546	5862	7348	7397	7916	6871	6293	5985	5305	5913	7357	6947	3964	5114	6067
ENSMUSG00000026073	Il1r2		chr1	40074079	40125231	+	2367	2544	2594	2341	1191	2091	1454	1315	1440	1487	1163	1249	1367	1941	2571	2371	1660	2268	2303
ENSMUSG00000097899	Gm16894		chr1	40076228	40085851	-	69	89	57	64	82	59	88	76	100	71	52	84	66	66	71	99	49	63	84
ENSMUSG00000026072	Il1r1		chr1	40225080	40317257	+	2410	2039	2501	2642	1164	1802	2376	1963	2025	2136	1922	1730	1430	1811	2482	1985	1113	1810	1962
ENSMUSG00000070942	Il1rl2		chr1	40324610	40367562	+	3369	3136	3503	3682	1563	2295	3681	3691	3281	3548	3141	2974	2753	2660	3565	3019	1312	2480	2855
ENSMUSG00000103230	Gm17970	pseudo_consens	chr1	40353852	40354536	+	143	107	133	216	85	113	136	137	106	129	62	87	79	148	244	136	40	80	157
ENSMUSG00000026069	Il1rl1		chr1	40429570	40465415	+	422	332	404	508	135	219	264	301	302	292	200	216	188	269	370	372	67	282	341
ENSMUSG00000026070	Il18r1		chr1	40465552	40500854	+	209	197	214	226	123	143	160	65	100	109	199	119	93	121	162	178	54	126	195
ENSMUSG00000026068	Il18rap		chr1	40515362	40551705	+	86	81	85	110	38	54	87	70	96	95	182	105	57	28	92	107	37	79	84
ENSMUSG00000026065	Slc9a4		chr1	40580081	40630725	+	53	33	25	50	5	19	35	16	20	25	24	16	27	41	41	14	20	26	51
ENSMUSG00000026062	Slc9a2		chr1	40680574	40769273	+	139	111	143	69	139	80	174	187	246	210	139	146	135	64	69	110	109	74	46
ENSMUSG00000041945	Mfsd9		chr1	40772038	40790687	-	102	96	75	147	51	98	80	53	119	86	79	67	61	122	133	80	66	102	58
ENSMUSG00000079588	Tmem182		chr1	40805601	40856887	+	1153	743	989	547	1171	565	303	395	411	372	258	259	445	424	531	748	706	640	394
ENSMUSG00000060424	Pantr1		chr1	42590782	42694842	-	40	30	33	49	21	29	10	10	5	6	14	4	13	29	13	27	22	14	29
ENSMUSG00000045515	Pou3f3	overlapping_locus	chr1	42694925	42703176	+	545	434	479	596	219	305	170	146	189	192	151	97	143	370	271	414	258	218	339
ENSMUSG00000060679	Mrps9		chr1	42851233	42905683	+	1285	1205	1236	1549	832	886	1167	1104	1102	1120	1000	849	877	874	1291	1115	824	793	920
ENSMUSG00000070939	Tgfbrap1		chr1	43047200	43098637	-	2416	2605	2884	2751	1027	1957	2260	2419	2634	2266	1838	1949	1627	2095	2687	2513	1379	1783	1939
ENSMUSG00000041878	8430432A02Rik		chr1	43092588	43093835	+	27	29	51	49	17	24	19	20	24	28	30	15	12	29	25	17	10	18	33
ENSMUSG00000010290	AI597479		chr1	43098710	43115947	+	1008	843	901	972	520	647	893	828	850	907	683	668	626	777	850	761	461	594	714
ENSMUSG00000008136	Fhl2		chr1	43123074	43196984	-	122	85	86	85	71	58	498	519	519	384	626	484	321	89	129	98	68	112	42
ENSMUSG00000066877	Nck2	overlapping_locus	chr1	43444579	43570515	+	861	865	924	1055	497	631	952	783	946	860	774	708	625	749	867	749	432	523	674
ENSMUSG00000026051	Ecrg4		chr1	43730602	43742578	+	955	672	710	869	656	400	345	195	359	309	261	163	301	445	433	520	625	334	433
ENSMUSG00000057363	Uxs1		chr1	43746966	43827800	-	772	795	656	873	589	617	727	738	689	719	582	572	564	544	708	751	491	531	548
ENSMUSG00000041763	Tpp2		chr1	43933647	44003000	+	1890	1654	1864	1804	771	1250	2613	2726	2553	2348	1911	2324	1918	1647	1930	1852	614	1418	1357
ENSMUSG00000026049	Tex30	overlapping_locus	chr1	44086613	44102441	-	161	265	165	183	92	123	170	187	160	188	211	172	126	110	134	129	67	110	129
ENSMUSG00000026047	Poglut2	overlapping_locus	chr1	44106546	44118808	-	463	504	487	574	214	327	406	421	321	427	339	342	327	357	404	333	215	278	374
ENSMUSG00000041684	Bivm		chr1	44118957	44144770	+	537	549	527	652	225	372	498	403	384	473	359	338	344	428	527	408	231	297	427
ENSMUSG00000026048	Ercc5		chr1	44147744	44181260	+	1478	1502	1300	1732	895	1030	1239	1219	1181	1108	970	1064	913	1091	1351	1248	590	906	1119
ENSMUSG00000056870	Gulp1	overlapping_locus	chr1	44551511	44796838	+	731	520	832	786	309	413	390	321	420	377	245	292	248	410	473	534	155	456	521
ENSMUSG00000102319	Gm37626	overlapping_locus	chr1	44560885	44565447	+	22	20	17	20	83	14	3	8	5	7	9	3	12	20	13	10	41	7	18
ENSMUSG00000026043	Col3a1	ncRNA_host	chr1	45311538	45349706	+	48540	47383	59428	89092	34667	78829	87139	52194	75221	77148	79363	58304	48629	43222	39715	47806	30973	32063	24502
ENSMUSG00000026042	Col5a2	overlapping_locus	chr1	45374321	45503282	-	8010	6098	7646	8486	3645	5683	7140	5264	7017	6424	5647	4728	4613	4974	5438	5878	3000	3795	4108
ENSMUSG00000104476	Gm38211	overlapping_locus	chr1	45485836	45493052	-	43	32	40	23	130	19	26	13	19	27	22	22	20	10	37	18	53	19	13
ENSMUSG00000025995	Wdr75		chr1	45795166	45823619	+	1257	1440	1309	1460	643	918	1322	1483	1348	1199	1160	1163	987	1012	1522	1178	492	924	1047
ENSMUSG00000084817	Gm5526	pseudo_consens	chr1	45857332	45857754	-	37	85	68	56	79	31	86	121	95	86	83	52	68	31	63	83	94	50	65
ENSMUSG00000025993	Slc40a1		chr1	45908068	45926523	-	2310	2434	2718	3067	566	1649	3228	2506	3797	2674	1800	2424	2231	2125	2304	2418	504	1362	2081
ENSMUSG00000041144	Dnah7b		chr1	46066315	46373550	+	51	34	60	87	32	22	16	23	43	23	17	23	16	34	39	50	15	17	34
ENSMUSG00000025986	Slc39a10	overlapping_locus	chr1	46807544	46892852	-	1332	1155	1446	1692	515	984	2633	2070	2270	2513	1538	1897	1345	1148	1372	1264	419	815	1119
ENSMUSG00000100213	Gm28151	overlapping_locus	chr1	46849529	46850479	-	84	101	142	172	80	78	149	111	118	108	70	66	91	166	150	85	31	47	168
ENSMUSG00000026109	Tmeff2	overlapping_locus	chr1	50900647	51187270	+	233	286	242	320	47	105	265	230	232	278	108	131	234	194	267	212	50	148	238
ENSMUSG00000045954	Cavin2		chr1	51289126	51302960	+	1953	1239	1842	1595	841	900	708	621	1042	846	545	612	767	986	1128	1332	501	1115	1300
ENSMUSG00000026107	Nabp1		chr1	51465862	51478425	-	966	1030	1093	1231	503	909	2011	1967	1388	1657	1287	1629	1145	1272	1771	1270	337	1155	1341
ENSMUSG00000018417	Myo1b	overlapping_locus	chr1	51749765	51916071	-	1664	1478	1516	1651	599	943	1999	1805	1934	1621	1631	1603	1340	1026	1443	1386	484	885	838
ENSMUSG00000026104	Stat1	overlapping_locus	chr1	52119440	52161865	+	591	794	741	707	594	393	870	895	598	524	607	447	567	634	704	957	386	360	659
ENSMUSG00000026103	Gls		chr1	52163448	52233232	-	4310	3808	4773	4954	1960	2562	3175	3075	2858	3027	2342	2303	2216	3295	3939	3494	1156	2499	3307
ENSMUSG00000002881	Nab1		chr1	52457294	52500679	-	3219	3187	3669	3634	1568	2265	4197	3913	4241	3714	3461	3352	2851	2619	3388	3231	1228	2420	2565
ENSMUSG00000043015	Nemp2		chr1	52630703	52651919	+	684	612	754	855	364	392	644	550	591	622	423	384	499	657	675	563	223	347	625
ENSMUSG00000041439	Mfsd6	overlapping_locus	chr1	52656286	52727462	-	5026	4803	5036	5544	1686	3312	4804	5117	5229	4373	3430	3910	3491	4021	4709	4754	1700	3020	3137
ENSMUSG00000026102	Inpp1		chr1	52785427	52817688	-	697	603	737	742	442	402	469	365	394	396	313	258	290	418	549	575	241	336	435
ENSMUSG00000041426	Hibch		chr1	52844929	52920986	+	879	889	1030	1081	565	634	730	673	792	726	521	521	627	731	766	838	348	565	693
ENSMUSG00000043629	1700019D03Rik		chr1	52922324	53020179	-	158	208	146	110	85	105	100	66	74	93	70	63	80	105	153	129	69	100	118
ENSMUSG00000026100	Mstn		chr1	53061640	53068079	+	325	259	320	174	468	156	88	121	110	102	54	52	172	130	148	189	116	170	80
ENSMUSG00000026098	Pms1		chr1	53189187	53297018	-	142	192	157	206	103	163	174	185	209	195	157	153	124	124	158	185	48	112	142
ENSMUSG00000026097	Ormdl1	overlapping_locus	chr1	53297095	53310309	+	423	449	485	512	223	294	391	379	361	380	265	313	311	372	436	341	162	304	407
ENSMUSG00000026096	Osgepl1	overlapping_locus	chr1	53313624	53326343	+	448	437	406	502	277	290	333	263	259	335	202	234	260	317	371	336	124	251	340
ENSMUSG00000026095	Asnsd1	overlapping_locus	chr1	53344617	53352752	-	282	348	324	377	332	255	302	210	250	280	260	294	250	237	279	269	248	245	312
ENSMUSG00000026094	Stk17b		chr1	53755506	53785224	-	1487	1390	1500	1688	572	974	1367	1246	1188	1234	1296	1218	951	941	1440	1272	534	1106	1308
ENSMUSG00000042807	Hecw2	overlapping_locus	chr1	53806876	54195168	-	277	263	311	329	109	155	182	174	228	188	133	150	150	170	167	243	71	175	194
ENSMUSG00000041303	Gtf3c3		chr1	54396004	54438971	-	717	714	757	769	357	508	685	631	776	687	561	543	549	624	703	591	325	413	532
ENSMUSG00000073678	Pgap1	overlapping_locus	chr1	54472994	54557684	-	1718	1578	1949	1807	594	1166	1209	1232	1188	1085	738	837	814	1673	1646	1596	407	996	1247
ENSMUSG00000052331	Ankrd44	overlapping_locus	chr1	54645340	54926387	-	1704	1501	1782	1977	668	1104	1035	1042	1113	1026	833	1030	761	1051	1490	1452	563	993	1204
ENSMUSG00000025982	Sf3b1		chr1	54985169	55027481	-	11952	10840	12318	12930	5155	7438	9773	8868	9873	9350	7604	7458	6932	8550	10076	10530	3362	6769	9490
ENSMUSG00000025981	Coq10b	overlapping_locus	chr1	55052770	55072702	+	678	591	676	805	304	383	589	677	693	506	521	516	464	467	599	503	250	436	452
ENSMUSG00000101122	Gm17971	overlapping_locus	chr1	55066264	55067069	+	55	46	50	71	27	24	48	34	34	30	29	19	31	42	27	33	14	23	37
ENSMUSG00000025980	Hspd1		chr1	55077835	55088243	-	3093	3040	3068	3161	1792	2044	3873	4083	3449	3441	3623	2867	2759	2453	3151	2836	1635	2066	2186
ENSMUSG00000073676	Hspe1		chr1	55088132	55091307	+	1111	1156	1009	1369	915	701	1355	1426	1392	1504	1404	1000	1094	795	1177	1123	922	779	1022
ENSMUSG00000025979	Mob4		chr1	55131231	55154899	+	2434	2612	2530	2848	1583	1656	2532	2464	2278	2342	1881	1930	1917	1888	2441	2296	957	1698	2012
ENSMUSG00000025978	Rftn2		chr1	55170159	55226782	-	1088	861	994	1309	675	624	485	480	470	509	371	329	383	636	623	667	817	563	721
ENSMUSG00000097649	Gm10561		chr1	55226251	55235622	+	103	76	86	97	99	51	56	48	39	45	38	31	51	67	53	50	74	40	59
ENSMUSG00000046994	Mars2		chr1	55237177	55248470	+	540	594	544	639	232	378	702	631	524	603	509	440	366	406	663	457	214	335	513
ENSMUSG00000038349	Plcl1	overlapping_locus	chr1	55405921	55754285	+	231	205	228	234	107	126	135	121	200	131	106	96	109	109	117	177	98	114	152
ENSMUSG00000038331	Satb2	overlapping_locus	chr1	56793981	56978650	-	58	27	25	26	8	22	67	45	47	48	35	57	34	34	32	29	17	22	26
ENSMUSG00000038323	1700066M21Rik		chr1	57377620	57385423	+	266	222	255	261	98	183	320	296	316	328	306	301	192	233	204	234	88	209	194
ENSMUSG00000048495	Tyw5		chr1	57388237	57407101	-	222	195	220	215	108	121	229	185	205	255	159	188	154	118	175	176	55	126	178
ENSMUSG00000025971	Maip1		chr1	57406328	57417953	+	432	430	408	428	215	297	419	325	356	292	330	262	295	296	348	441	266	286	313
ENSMUSG00000038305	Spats2l		chr1	57774162	57948394	+	696	632	625	761	264	452	449	452	545	425	323	297	370	448	566	624	367	368	459
ENSMUSG00000054770	Kctd18		chr1	57955101	58018956	-	1206	1262	1114	1496	637	793	1058	870	1192	906	768	797	698	802	1235	1174	442	648	870
ENSMUSG00000026039	Sgo2a		chr1	57995971	58025899	+	68	96	94	82	57	66	187	194	240	206	205	147	116	74	103	74	37	82	67
ENSMUSG00000063558	Aox1		chr1	58029931	58106413	+	2576	1772	2019	2678	846	1063	718	702	1055	824	410	479	668	1014	1576	1880	531	858	1252
ENSMUSG00000064294	Aox3		chr1	58113130	58200698	+	141	95	106	226	62	77	63	72	122	90	70	61	77	70	141	155	56	86	133
ENSMUSG00000038242	Aox4		chr1	58210397	58268597	+	411	738	617	1017	518	855	10249	10856	9856	8479	6686	8630	7242	2686	5654	2696	1450	2911	1748
ENSMUSG00000089822	Gm15759		chr1	58254117	58315656	-	25	34	21	35	9	14	176	154	111	118	71	81	71	42	85	32	1	43	46
ENSMUSG00000079554	Aox2		chr1	58278326	58380259	+	49	69	81	91	41	58	40	47	46	44	32	35	33	46	107	51	38	55	59
ENSMUSG00000103839	Gm37607		chr1	58383512	58386134	-	77	99	86	103	94	59	97	113	44	74	64	65	78	101	68	73	36	39	108
ENSMUSG00000051223	Bzw1		chr1	58392898	58407353	+	7169	7177	7270	7467	3791	5386	9091	10178	9282	9013	9893	8548	6636	5477	7668	6492	3306	5974	5444
ENSMUSG00000026034	Clk1		chr1	58410189	58424066	-	9882	9117	10016	11219	6493	6866	9396	8044	7921	8256	6425	7124	6904	7113	10173	8197	2368	5852	9756
ENSMUSG00000026035	Ppil3		chr1	58430994	58445486	-	509	405	539	578	358	320	556	554	464	439	428	364	375	326	497	457	297	301	425
ENSMUSG00000026036	Nif3l1		chr1	58445151	58481816	+	596	651	637	730	295	473	759	674	622	607	586	594	518	466	555	558	405	448	461
ENSMUSG00000026037	Orc2	ncRNA_host	chr1	58462771	58505109	-	947	872	857	993	538	659	942	1001	882	886	827	717	606	642	954	659	412	633	615
ENSMUSG00000085054	Gm15834		chr1	58505148	58523230	+	31	46	67	36	29	34	28	49	35	35	24	19	26	55	24	44	12	20	29
ENSMUSG00000038174	Fam126b		chr1	58522806	58586323	-	1134	909	1291	1334	558	754	835	882	904	946	636	729	613	822	1155	965	288	678	948
ENSMUSG00000026032	Ndufb3		chr1	58586384	58595964	+	1470	1594	1229	1553	1994	930	1458	1191	1363	1425	1346	1122	1102	961	1436	1271	1171	1060	1165
ENSMUSG00000047528	Flacc1		chr1	58646903	58695989	-	67	68	48	67	24	40	25	38	46	32	24	33	39	59	74	59	17	32	47
ENSMUSG00000102059	Gm20257		chr1	58652641	58655831	+	166	143	165	192	120	99	68	74	78	80	60	70	67	107	102	126	58	75	126
ENSMUSG00000026031	Cflar		chr1	58711508	58758884	+	2804	2508	3073	3203	1296	1724	2641	2409	2186	2399	1770	1885	1831	2392	2701	2400	927	1756	2296
ENSMUSG00000026029	Casp8	overlapping_locus	chr1	58795374	58847503	+	920	938	1138	1167	531	708	1247	1108	1051	1048	922	780	801	845	943	1007	445	739	877
ENSMUSG00000102719	Gm37760	overlapping_locus	chr1	58797783	58801623	+	51	34	26	33	74	17	34	43	23	37	33	22	16	14	51	40	43	15	30
ENSMUSG00000099719	Gm28802		chr1	58850085	58892792	-	31	94	84	81	60	45	88	95	105	73	134	104	72	35	52	39	63	51	55
ENSMUSG00000026028	Trak2		chr1	58900449	58973430	-	2497	2246	2668	2617	1225	1628	2534	2485	2342	2422	2070	2123	1743	1752	2295	2056	1000	1655	1828
ENSMUSG00000026027	Stradb		chr1	58973522	58995715	+	671	596	698	664	396	432	572	505	537	496	433	451	419	467	618	568	364	480	595
ENSMUSG00000038079	Tmem237		chr1	59100590	59120408	-	360	379	356	467	229	292	361	365	383	301	274	336	250	312	365	336	161	307	290
ENSMUSG00000097573	G730003C15Rik		chr1	59119833	59122141	+	53	76	78	65	39	54	53	62	55	67	35	41	34	74	62	37	37	47	53
ENSMUSG00000101586	Gm29017	overlapping_locus	chr1	59151047	59169320	+	27	38	39	51	18	25	9	17	21	32	16	18	26	23	25	28	7	16	32
ENSMUSG00000026024	Als2	overlapping_locus	chr1	59162926	59237231	-	1071	894	975	1106	542	779	893	924	973	814	700	706	613	816	979	891	490	684	718
ENSMUSG00000026023	Cdk15		chr1	59256906	59352993	+	51	63	97	116	46	40	92	37	66	97	52	64	73	72	50	81	35	33	60
ENSMUSG00000041075	Fzd7		chr1	59482424	59486955	+	3352	3047	3434	3636	1521	2214	3076	2597	3050	2783	2044	2163	2248	2426	2854	2876	1738	1928	2142
ENSMUSG00000097819	Gm26813		chr1	59488480	59492605	-	140	150	139	138	116	134	112	110	204	139	129	133	109	57	126	117	192	97	61
ENSMUSG00000047361	Gm973	ncRNA_host	chr1	59516264	59636417	+	664	689	623	835	424	353	505	373	495	423	280	337	353	415	406	367	339	208	422
ENSMUSG00000026021	Sumo1	overlapping_locus	chr1	59586558	59670834	-	1445	1812	1656	1839	1223	992	1578	1643	1575	1460	1331	1212	1232	1200	1546	1622	685	990	1484
ENSMUSG00000103821	D430013B06Rik	overlapping_locus	chr1	59646200	59648071	-	38	38	87	66	21	38	41	46	38	57	25	21	21	38	62	45	6	19	46
ENSMUSG00000026020	Nop58	ncRNA_host	chr1	59684971	59719044	+	2167	2344	2178	2236	1998	1535	2773	2988	2642	2796	2871	2331	1971	1761	2392	2305	1124	1520	1449
ENSMUSG00000067336	Bmpr2	overlapping_locus	chr1	59763400	59879014	+	6268	5480	6903	6362	2373	4010	5628	5043	5642	4810	3921	4321	3738	4728	5371	5576	1850	3545	3733
ENSMUSG00000041040	Fam117b	overlapping_locus	chr1	59913006	59985346	+	2009	1749	1862	1961	749	1181	1620	1454	1848	1632	1222	1185	1163	1384	1554	1626	926	1095	1227
ENSMUSG00000026018	Ica1l		chr1	59982490	60043184	-	42	32	29	57	21	16	71	41	53	46	50	38	39	20	17	26	11	19	21
ENSMUSG00000026019	Wdr12		chr1	60069785	60098645	-	598	656	552	674	426	498	845	908	791	811	856	700	594	465	722	616	372	485	574
ENSMUSG00000026017	Carf	overlapping_locus	chr1	60098247	60153953	+	510	589	616	703	286	356	516	372	412	434	367	369	321	563	590	513	179	282	512
ENSMUSG00000073664	Nbeal1		chr1	60180599	60338328	+	1576	1135	2020	2135	682	1045	1236	940	1086	1051	741	734	681	1141	1496	1233	365	1054	1413
ENSMUSG00000049439	Cyp20a1	overlapping_locus	chr1	60343323	60388060	+	748	635	618	754	415	501	478	427	508	480	344	368	392	522	680	640	364	510	520
ENSMUSG00000026782	Abi2		chr1	60409619	60481158	+	957	832	983	907	568	648	719	766	808	716	603	600	521	539	908	809	445	663	597
ENSMUSG00000026014	Raph1	overlapping_locus	chr1	60482292	60567104	-	3823	2650	3665	3552	1823	2383	2600	2318	2623	2556	1887	1853	1762	2785	2847	2971	1533	1962	2402
ENSMUSG00000101188	Eif4a-ps4		chr1	60703932	60705149	+	131	122	126	119	83	109	150	165	183	187	155	143	149	95	175	119	67	91	116
ENSMUSG00000026012	Cd28		chr1	60716800	60773359	+	142	76	139	138	68	77	72	89	76	127	68	66	84	93	106	116	78	106	94
ENSMUSG00000083355	Gm11581	pseudo_consens	chr1	60809116	60809942	+	119	108	118	130	81	73	58	30	69	46	38	39	40	62	102	109	45	43	80
ENSMUSG00000026011	Ctla4	overlapping_locus	chr1	60887000	60915832	+	33	55	40	30	28	31	60	19	51	44	48	41	19	42	29	57	10	32	29
ENSMUSG00000026009	Icos	overlapping_locus	chr1	60977927	61000320	+	37	62	57	55	29	26	126	69	54	103	180	93	61	51	73	76	42	61	61
ENSMUSG00000052062	Pard3b	overlapping_locus	chr1	61638824	62642284	+	819	699	848	925	510	484	433	421	551	429	327	339	369	503	477	578	391	398	510
ENSMUSG00000025969	Nrp2	overlapping_locus	chr1	62703285	62818695	+	2372	1815	2529	3175	1145	1558	2916	2346	2824	2707	1953	1835	1849	1864	2573	2282	1672	1682	2064
ENSMUSG00000103032	Gm37121	overlapping_locus	chr1	62809302	62811857	+	38	42	65	74	28	41	78	72	96	103	35	61	46	58	207	92	17	72	68
ENSMUSG00000100426	Gm4208		chr1	62821355	62832370	-	51	71	58	92	63	54	100	70	67	67	59	75	71	116	187	116	98	117	110
ENSMUSG00000040865	Ino80d		chr1	62958418	63114667	-	2486	2104	2751	2944	1049	1524	2124	2006	2312	2080	1526	1515	1355	2044	2496	2227	833	1405	2112
ENSMUSG00000084799	Ino80dos	overlapping_locus	chr1	63113078	63158290	+	151	164	171	249	85	150	116	79	106	123	88	89	83	134	167	154	46	114	176
ENSMUSG00000101599	Gm20342	overlapping_locus	chr1	63117118	63126837	+	475	393	512	671	474	296	362	287	313	333	218	225	276	451	521	492	225	224	536
ENSMUSG00000025968	Ndufs1		chr1	63143596	63176833	-	3502	3371	3223	3068	2303	2026	2961	2871	3071	2881	2495	2192	2121	2207	2688	2829	1538	1961	1882
ENSMUSG00000025967	Eef1b2	ncRNA_host	chr1	63176825	63180486	+	15081	16994	14282	18906	10424	10340	17874	15626	15790	17379	16637	13720	13396	12018	16294	14564	13063	11294	17322
ENSMUSG00000046856	Gpr1		chr1	63182691	63214543	-	33	44	81	33	14	23	34	23	21	33	20	16	22	51	29	35	29	33	61
ENSMUSG00000027520	Zdbf2		chr1	63273265	63314576	+	62	73	91	72	62	39	48	43	18	41	23	16	18	43	43	62	24	43	47
ENSMUSG00000025964	Adam23		chr1	63445891	63596276	+	939	610	773	1092	243	404	405	369	735	465	408	237	373	476	506	860	284	308	519
ENSMUSG00000025962	Fastkd2		chr1	63730614	63754655	+	488	452	495	466	280	314	458	427	456	414	388	320	309	344	512	449	203	290	407
ENSMUSG00000025959	Klf7	ncRNA_host	chr1	64029447	64122282	-	1507	1044	1498	1754	954	809	1274	1336	1212	1259	1028	884	877	878	1132	1067	771	900	1056
ENSMUSG00000025958	Creb1		chr1	64532645	64604548	+	1933	1801	2111	2273	1086	1319	1913	1910	1701	1864	1459	1376	1280	1680	1957	1703	626	1300	1589
ENSMUSG00000025956	Mettl21a		chr1	64606473	64617242	-	497	533	508	558	297	332	442	358	342	369	318	298	260	455	434	453	274	322	450
ENSMUSG00000070871	Ccnyl1		chr1	64690455	64725644	+	486	458	459	472	211	327	521	474	513	426	443	377	325	323	419	348	224	339	304
ENSMUSG00000045005	Fzd5		chr1	64730558	64737751	-	540	601	614	593	251	408	820	666	916	837	611	662	520	378	541	523	292	347	355
ENSMUSG00000051344	Plekhm3		chr1	64785983	64956824	-	939	800	864	1034	346	558	1030	899	906	935	692	643	593	761	966	944	437	596	671
ENSMUSG00000084416	Rpl10a-ps1		chr1	64993951	64994604	-	157	213	201	257	141	129	268	253	204	258	236	170	194	183	202	177	289	174	230
ENSMUSG00000025950	Idh1		chr1	65158616	65186500	-	3819	3630	3715	4484	1588	2237	3240	2605	3256	2821	2347	2313	2351	2544	2839	2897	2070	2330	2769
ENSMUSG00000025949	Pikfyve		chr1	65186683	65278695	+	1719	1376	1716	1801	771	1027	1442	1259	1266	1334	887	933	901	1464	1535	1413	457	877	1316
ENSMUSG00000015222	Map2	ncRNA_host	chr1	66175273	66442583	+	5178	4988	5544	5659	1278	3296	5137	5599	5146	4470	3417	4439	3975	4178	5066	4612	904	2691	3837
ENSMUSG00000073656	Gm10558		chr1	66322276	66328796	-	14	21	5	16	94	8	3	24	2	15	20	10	20	7	20	14	37	11	14
ENSMUSG00000055567	Unc80		chr1	66468367	66699148	+	38	52	54	42	10	30	4	20	34	23	15	9	14	36	37	38	17	17	34
ENSMUSG00000026005	Rpe		chr1	66700831	66719805	+	911	942	858	973	443	624	984	876	858	1076	748	687	699	772	991	798	249	525	873
ENSMUSG00000026004	Kansl1l	overlapping_locus	chr1	66719248	66817562	-	1021	855	1139	1032	456	644	862	666	706	673	576	585	538	895	823	882	284	606	894
ENSMUSG00000102559	Gm37570	overlapping_locus	chr1	66765626	66768731	-	21	34	41	50	23	23	35	32	26	18	22	24	22	45	45	41	14	16	36
ENSMUSG00000102776	Gm38162		chr1	66775511	66780107	+	27	20	36	45	20	17	33	48	47	19	35	26	23	37	33	17	6	23	42
ENSMUSG00000103756	Gm37285	overlapping_locus	chr1	66799659	66800797	-	19	22	45	34	33	25	43	21	13	21	35	23	14	28	21	20	19	25	17
ENSMUSG00000026003	Acadl	overlapping_locus	chr1	66830839	66863277	-	3233	2854	3157	3155	1983	1871	3468	2891	3118	2647	2992	2125	2506	2336	2654	2934	2718	2491	2234
ENSMUSG00000061816	Myl1		chr1	66924295	66945404	-	8318	6310	7683	4559	11413	4498	3136	3353	3760	3795	2536	1793	4669	3598	3901	6029	5488	4289	3920
ENSMUSG00000026000	Lancl1		chr1	67000517	67038872	-	3367	3952	3430	4120	1817	2723	3776	3157	3986	3308	3017	2925	2866	3325	3554	3745	2316	2623	3087
ENSMUSG00000025991	Cps1		chr1	67123026	67231259	+	1	5	1	7	2	2	96	71	117	119	88	79	42	10	18	7	3	5	3
ENSMUSG00000062209	Erbb4	overlapping_locus	chr1	68032186	69108059	-	39	35	57	32	32	28	12	17	42	29	6	7	20	33	28	49	17	19	18
ENSMUSG00000025997	Ikzf2	overlapping_locus	chr1	69531214	69687245	-	1316	1389	1557	1696	877	877	1159	834	1009	917	621	646	671	1062	1380	1252	411	696	1172
ENSMUSG00000026196	Bard1	overlapping_locus	chr1	71027498	71103146	-	195	182	160	254	139	149	348	248	248	297	254	197	159	164	132	132	115	133	94
ENSMUSG00000050296	Abca12		chr1	71242276	71414910	-	9489	9772	10197	9656	2231	6103	11277	14244	11758	8875	8310	10110	8506	7589	9653	9227	2222	5745	5753
ENSMUSG00000026192	Atic		chr1	71557150	71579631	+	1941	1846	1769	2044	1319	1325	2078	1903	2013	2024	1855	1417	1316	1466	1722	1543	1344	1265	1244
ENSMUSG00000026193	Fn1		chr1	71585520	71653200	-	22153	15264	22685	22875	6175	11125	14810	13564	16707	15354	10629	8700	11940	13045	14547	15235	7630	9623	10007
ENSMUSG00000039395	Mreg		chr1	72159442	72212307	-	3296	3239	3083	3272	1414	2375	3286	3205	3317	2957	2423	2973	2330	2528	3526	3096	1283	2050	2288
ENSMUSG00000026189	Pecr		chr1	72259167	72284314	-	513	499	516	613	391	378	330	380	350	365	281	223	265	414	496	447	332	285	405
ENSMUSG00000026187	Xrcc5		chr1	72307427	72394952	+	958	1069	915	914	508	686	1069	1130	1044	976	886	813	624	638	945	790	476	675	478
ENSMUSG00000039354	Smarcal1		chr1	72583251	72633134	+	824	820	892	859	449	491	670	612	638	599	443	438	540	592	652	666	406	463	644
ENSMUSG00000046330	Rpl37a		chr1	72711290	72713813	+	7569	9608	6454	9730	6429	5578	8621	7265	7348	7834	8717	6426	6356	5959	7557	7629	9111	5971	8294
ENSMUSG00000039323	Igfbp2		chr1	72824503	72852474	+	3333	3146	2717	4941	1390	1810	5990	5908	6292	6009	4465	4342	3892	2866	3190	2720	2501	2033	2143
ENSMUSG00000026185	Igfbp5		chr1	72857932	72874884	-	26001	23653	34481	35006	12885	20540	11753	10704	13724	12676	7531	8424	7990	16359	18625	20452	10064	14706	15151
ENSMUSG00000100301	6030407O03Rik	overlapping_locus	chr1	73618088	73864466	-	23	23	51	25	41	25	7	3	6	4	8	3	6	15	5	22	10	20	14
ENSMUSG00000055322	Tns1		chr1	73910231	74124449	-	18727	14731	17588	18375	9213	11084	9159	8592	10157	9464	6024	6254	7063	11377	14557	14348	9978	10665	12098
ENSMUSG00000061815	Rufy4		chr1	74125541	74148223	+	180	172	162	213	167	106	150	134	134	126	91	101	98	131	166	162	122	118	139
ENSMUSG00000026180	Cxcr2		chr1	74153989	74161246	+	99	129	114	120	48	82	665	871	613	510	502	550	553	295	377	231	69	207	113
ENSMUSG00000006304	Arpc2		chr1	74236084	74268209	+	9645	10222	9784	10377	5801	6847	11306	12042	11040	10290	10350	8857	8770	7506	10242	9900	6991	7516	7357
ENSMUSG00000006299	Aamp		chr1	74279840	74284738	-	5395	6192	4927	6630	3270	3695	5702	5234	5228	4877	4127	3863	3903	4045	5513	4951	3813	3638	3998
ENSMUSG00000026179	Pnkd	overlapping_locus	chr1	74284930	74353694	+	2525	2341	2226	2959	1029	1654	1230	1088	1170	1153	749	881	984	1743	1953	1864	1091	1054	1866
ENSMUSG00000006301	Tmbim1		chr1	74288247	74305622	-	8097	7254	7765	8341	4408	5138	5139	5027	4749	4524	3743	3578	4128	5746	6662	6157	4642	4441	6187
ENSMUSG00000073650	Catip		chr1	74362108	74369321	+	53	94	86	83	47	48	33	42	33	42	35	27	28	46	38	67	28	35	42
ENSMUSG00000026177	Slc11a1		chr1	74375195	74386062	+	570	349	400	584	100	175	428	500	642	430	249	237	410	288	523	727	120	282	470
ENSMUSG00000026176	Ctdsp1	ncRNA_host	chr1	74391509	74397285	+	4983	4685	4726	5674	2160	3093	3607	2888	3510	3281	2686	2209	2599	3427	3922	4321	3104	2719	3456
ENSMUSG00000033364	Usp37	overlapping_locus	chr1	74435511	74544284	-	789	626	794	737	433	498	826	875	745	766	542	558	565	759	863	636	305	472	541
ENSMUSG00000026174	Cnot9		chr1	74506058	74530842	+	1606	1601	1534	1829	877	1140	1799	1882	1719	1599	1631	1349	1208	1342	1552	1528	1084	1137	1050
ENSMUSG00000026173	Plcd4		chr1	74542888	74567794	+	120	60	65	48	106	60	22	36	34	41	13	16	28	40	65	46	23	43	35
ENSMUSG00000026135	Zfp142	ncRNA_host	chr1	74565127	74588246	-	737	516	820	844	294	513	799	666	639	680	383	527	415	617	857	653	304	492	649
ENSMUSG00000026172	Bcs1l		chr1	74588289	74592443	+	376	333	381	452	273	258	298	300	241	334	264	207	254	325	304	345	260	241	319
ENSMUSG00000026171	Rnf25		chr1	74593748	74601397	-	1106	1143	1017	1220	616	762	981	998	1000	987	848	871	733	763	1070	955	655	714	916
ENSMUSG00000033276	Stk36		chr1	74601445	74636894	+	96	41	73	119	55	74	97	67	68	59	60	55	44	30	96	62	29	48	63
ENSMUSG00000033257	Ttll4		chr1	74661745	74703730	+	2025	1675	1953	2120	842	1361	1547	1664	1449	1494	1274	1293	1047	1398	1947	1590	621	1108	1566
ENSMUSG00000026170	Cyp27a1		chr1	74713574	74737892	+	1081	918	1143	1296	455	619	827	543	682	587	492	500	580	802	1035	949	501	708	1048
ENSMUSG00000006542	Prkag3		chr1	74738922	74749221	-	102	109	93	89	125	87	85	48	106	73	71	70	94	47	100	91	60	97	54
ENSMUSG00000033227	Wnt6		chr1	74771892	74785322	+	278	241	213	323	111	163	262	257	194	242	161	178	160	223	226	182	190	156	163
ENSMUSG00000026167	Wnt10a		chr1	74791516	74804179	+	1025	1025	902	1045	542	633	1391	1310	1066	1207	1085	781	864	763	922	744	787	785	511
ENSMUSG00000026162	Nhej1	fragmented_locus	chr1	74967139	75125200	-	89	127	74	127	55	62	110	85	90	97	90	79	91	70	99	78	73	60	93
ENSMUSG00000026205	Slc23a3		chr1	75125541	75133890	-	184	206	175	165	76	163	103	107	139	102	109	90	72	117	184	123	82	140	106
ENSMUSG00000033159	Cnppd1		chr1	75134554	75142711	-	3280	3271	3126	3729	1816	2203	3716	3064	3387	2892	2558	2624	2449	2568	3533	2991	2530	2279	2627
ENSMUSG00000049339	Retreg2		chr1	75142778	75147913	+	3787	4100	3477	4463	1772	2771	3234	2961	3149	2727	2455	2278	2446	2974	3453	3426	2834	2508	2822
ENSMUSG00000026197	Zfand2b		chr1	75168646	75171629	+	1316	1592	1226	1435	777	904	1361	1122	1216	1185	1020	985	830	908	1347	1178	977	874	1096
ENSMUSG00000026198	Abcb6	overlapping_locus	chr1	75171717	75180392	-	89	112	91	154	90	91	118	195	150	81	104	105	110	80	124	156	95	101	82
ENSMUSG00000033124	Atg9a	overlapping_locus	chr1	75180860	75192196	-	1423	1385	1433	1618	575	1061	1298	1298	1379	1179	963	1038	938	1008	1494	1346	668	998	916
ENSMUSG00000026199	Ankzf1		chr1	75192151	75199387	+	1602	1478	1473	1803	834	951	1430	1289	1242	1193	860	898	949	1269	1605	1270	635	820	1306
ENSMUSG00000026200	Glb1l	ncRNA_host	chr1	75198236	75210813	-	478	469	572	619	296	294	425	336	282	389	269	248	233	354	503	474	176	262	360
ENSMUSG00000026201	Stk16		chr1	75210838	75215606	+	1189	986	1103	1401	717	737	1470	1230	1014	1126	1055	911	858	925	1005	937	591	820	1104
ENSMUSG00000026202	Tuba4a		chr1	75214228	75219865	-	10003	12526	8962	9423	5495	7669	12573	15446	12641	11287	11512	10734	9868	7270	10836	8880	5896	7102	5867
ENSMUSG00000096094	A630095N17Rik		chr1	75220095	75232102	-	27	62	31	31	15	23	22	34	18	17	19	21	20	27	22	22	14	17	23
ENSMUSG00000026203	Dnajb2		chr1	75236406	75245692	+	3181	3183	2982	3512	1901	2073	2921	3171	2811	2488	1957	2105	2216	2641	3151	2717	1666	1873	2397
ENSMUSG00000026209	Dnpep		chr1	75307896	75317990	-	2366	2555	2191	2635	1370	1718	1885	1785	1563	1653	1301	1356	1395	1836	1909	1947	1445	1403	1860
ENSMUSG00000026208	Des		chr1	75360329	75368579	+	10127	7868	7581	4955	11107	4512	3613	4472	4911	4668	3229	2733	5054	4315	4763	7433	8796	5715	3861
ENSMUSG00000026207	Speg		chr1	75375297	75432320	+	1393	1041	1145	962	1188	714	598	544	634	552	321	313	586	583	730	1041	501	579	559
ENSMUSG00000033021	Gmppa		chr1	75435930	75443179	+	1599	1810	1465	2033	1022	1171	1532	1472	1413	1478	1016	981	947	1208	1593	1513	777	895	1266
ENSMUSG00000032997	Chpf		chr1	75474569	75479307	-	1127	1097	977	1558	509	773	633	607	563	645	435	406	413	706	821	895	571	615	585
ENSMUSG00000026211	Obsl1		chr1	75479310	75506452	-	1519	1340	1312	1624	986	814	1003	839	950	1036	565	565	719	1064	1259	1114	618	660	896
ENSMUSG00000051703	Tmem198		chr1	75479532	75485705	+	41	42	49	100	50	47	59	54	44	46	26	27	24	45	39	60	30	29	62
ENSMUSG00000032968	Inha		chr1	75507077	75510366	+	286	353	299	445	255	242	338	264	346	330	228	239	195	260	377	287	147	193	279
ENSMUSG00000026213	Stk11ip		chr1	75521529	75537335	+	1557	1548	1354	1927	872	1019	1544	1319	1486	1267	1002	1020	923	1182	1588	1404	868	848	1213
ENSMUSG00000006576	Slc4a3		chr1	75546266	75562172	+	1126	964	857	1291	679	659	641	539	521	590	371	353	414	751	876	768	415	460	645
ENSMUSG00000026235	Epha4	ncRNA_host	chr1	77367185	77515088	-	1331	1231	1416	1444	511	837	2328	2111	2076	1845	1415	1243	1315	1183	1247	1382	454	713	758
ENSMUSG00000004872	Pax3		chr1	78101267	78197134	-	92	58	96	92	45	33	39	32	42	46	19	22	38	67	60	46	25	40	54
ENSMUSG00000032908	Sgpp2	overlapping_locus	chr1	78310345	78420289	+	470	552	770	784	465	812	1224	1415	1464	1436	1088	993	963	1887	3031	1803	1308	1689	1760
ENSMUSG00000026245	Farsb	overlapping_locus	chr1	78417975	78488897	-	1000	1075	1005	1105	615	721	1197	1431	1065	1225	1330	983	966	747	845	904	718	717	755
ENSMUSG00000090486	BC035947	overlapping_locus	chr1	78497026	78512158	-	125	71	97	118	113	75	35	44	37	43	22	27	34	71	82	63	74	50	69
ENSMUSG00000012187	Mogat1		chr1	78510991	78538173	+	154	126	94	131	114	58	30	48	34	36	44	21	41	119	69	90	112	52	89
ENSMUSG00000032883	Acsl3	overlapping_locus	chr1	78657825	78707743	+	853	719	821	877	551	635	816	855	834	873	706	715	668	700	715	742	511	604	503
ENSMUSG00000079470	Utp14b	overlapping_locus	chr1	78658038	78671512	+	154	195	192	221	128	153	307	259	322	296	230	228	166	181	183	204	93	170	143
ENSMUSG00000047330	Kcne4		chr1	78816758	78820028	+	91	92	113	125	68	61	39	40	52	41	76	81	36	55	76	85	67	64	30
ENSMUSG00000054702	Ap1s3	overlapping_locus	chr1	79606876	79671972	-	649	634	686	663	183	465	571	591	650	537	442	481	450	472	544	532	197	406	449
ENSMUSG00000073643	Wdfy1		chr1	79702262	79776143	-	796	737	776	852	589	546	693	591	564	528	513	511	461	588	765	582	393	486	656
ENSMUSG00000026248	Mrpl44		chr1	79776018	79781445	+	813	839	773	822	507	561	782	740	726	753	672	532	615	606	758	768	615	599	666
ENSMUSG00000026249	Serpine2		chr1	79794197	79861180	-	1466	1198	1249	1316	1360	1170	959	978	1133	1158	1172	837	891	888	929	1051	1522	1026	712
ENSMUSG00000043230	Fam124b		chr1	80198706	80218473	-	174	178	224	183	33	161	69	89	65	49	34	53	67	179	208	113	20	67	132
ENSMUSG00000101257	2310015K22Rik		chr1	80225044	80228792	+	129	123	188	170	71	122	135	156	110	133	59	90	139	153	216	119	32	109	144
ENSMUSG00000004364	Cul3	overlapping_locus	chr1	80264923	80340480	-	7246	6760	8052	7133	2663	5061	6078	6173	6372	5216	4606	5713	4801	5306	6740	6361	1898	4576	4746
ENSMUSG00000103076	Gm37902	overlapping_locus	chr1	80274731	80276413	-	29	11	25	19	3	22	55	43	23	33	28	22	19	34	38	56	2	19	48
ENSMUSG00000038608	Dock10	overlapping_locus	chr1	80501073	80758527	-	928	717	1093	1093	326	499	709	601	533	744	559	430	500	676	901	897	221	513	797
ENSMUSG00000055980	Irs1		chr1	82233101	82291416	-	1220	774	1012	1210	361	648	414	446	346	441	254	307	244	671	685	663	296	546	568
ENSMUSG00000026142	Rhbdd1	overlapping_locus	chr1	82316452	82445366	+	1203	1057	1236	1185	509	748	1013	1066	1035	978	806	815	758	839	934	957	594	696	672
ENSMUSG00000067158	Col4a4		chr1	82448423	82586849	-	248	270	339	292	174	239	119	88	158	146	110	129	115	176	194	202	177	141	155
ENSMUSG00000079465	Col4a3	ncRNA_host	chr1	82586921	82722059	+	220	139	164	162	103	123	61	86	100	89	68	73	81	106	106	106	49	92	102
ENSMUSG00000026150	Mff	overlapping_locus	chr1	82724890	82752394	+	2455	2251	2367	2783	1332	1670	2346	1860	2113	2225	1865	1814	1631	1696	2257	2181	1069	1541	1874
ENSMUSG00000101450	Gm28941	overlapping_locus	chr1	82739691	82740707	+	38	21	65	55	7	24	15	22	33	31	15	28	16	39	51	33	6	18	39
ENSMUSG00000114299	Gm47791		chr1	82770824	82771243	-	0	1	0	0	3	4	597	555	669	458	235	506	289	5	22	3	16	9	11
ENSMUSG00000026159	Agfg1		chr1	82839483	82901182	+	2962	2729	3126	3179	1243	2095	2902	2896	2994	2617	2316	2316	1902	2286	2881	2709	1017	1888	2199
ENSMUSG00000113880	A030005L19Rik		chr1	82913325	82914130	+	43	29	29	35	38	20	861	762	905	609	470	821	480	19	46	19	34	41	38
ENSMUSG00000113973	A030014E15Rik		chr1	82924917	82925712	+	1	0	4	4	27	9	617	664	616	417	450	712	387	5	11	0	11	9	14
ENSMUSG00000113846	Gm6217		chr1	82930571	82931399	-	0	0	1	0	0	0	45	24	40	33	43	44	25	0	0	2	0	0	1
ENSMUSG00000113084	A030003K21Rik		chr1	82942559	82943388	-	5	0	1	0	5	4	234	290	304	227	151	234	189	4	5	2	6	2	6
ENSMUSG00000113925	Gm7544		chr1	82955186	82956013	-	5	0	3	4	23	0	769	525	676	488	424	523	368	3	20	8	18	10	21
ENSMUSG00000114011	Gm47955		chr1	82960286	82960924	+	0	0	9	3	14	1	602	355	497	344	363	418	322	11	16	4	7	7	10
ENSMUSG00000113097	Gm47959		chr1	83000548	83001480	+	0	2	8	0	33	2	886	923	964	768	587	896	492	15	23	1	21	11	26
ENSMUSG00000038496	Slc19a3		chr1	83012523	83038448	-	52	58	38	36	17	42	42	31	26	24	34	30	34	52	56	49	44	53	38
ENSMUSG00000100190	Krtap28-10		chr1	83041524	83042480	-	0	0	2	6	40	4	1316	1208	1319	967	875	1503	779	7	24	13	21	18	27
ENSMUSG00000113267	Gm47969		chr1	83044932	83045946	+	0	0	1	3	58	5	1104	1110	1221	960	828	1224	694	11	29	8	59	15	26
ENSMUSG00000104423	A030005K14Rik		chr1	83058286	83059378	-	0	0	0	0	32	1	1231	1101	1105	848	700	1189	701	23	35	10	37	16	38
ENSMUSG00000101315	Krtap28-13		chr1	83060930	83061921	+	4	0	0	0	51	9	1433	1245	1427	1022	829	1434	748	5	49	16	40	19	29
ENSMUSG00000026166	Ccl20		chr1	83116766	83119167	+	21	19	20	18	26	23	154	158	82	125	128	114	56	39	93	31	34	51	33
ENSMUSG00000026163	Sphkap	overlapping_locus	chr1	83254139	83408200	-	59	26	22	33	15	24	6	10	17	1	4	5	5	14	20	23	11	17	13
ENSMUSG00000045658	Pid1	overlapping_locus	chr1	84036296	84364180	-	953	838	1078	1126	425	616	536	588	657	733	585	434	550	641	828	842	495	682	1004
ENSMUSG00000026219	Trip12	overlapping_locus	chr1	84721189	84840516	-	9463	8410	10359	9986	3973	6809	9842	10398	10078	8976	7836	8721	7051	7626	9230	8896	3538	6482	6607
ENSMUSG00000073633	Fbxo36		chr1	84839841	84900487	+	129	122	135	126	104	72	86	86	116	98	109	105	85	93	81	124	133	95	87
ENSMUSG00000026220	Slc16a14		chr1	84905898	84935134	-	866	1013	908	1178	219	691	1390	1027	1510	1085	887	989	707	853	964	999	337	542	578
ENSMUSG00000118607	AC147806.2		chr1	85526602	85552178	+	23	20	34	39	12	24	44	21	30	44	19	35	20	25	29	31	14	11	19
ENSMUSG00000070034	Sp110		chr1	85576899	85598817	-	113	166	199	204	102	99	167	178	160	194	198	121	174	192	213	260	118	152	247
ENSMUSG00000070031	Sp140		chr1	85600378	85645037	+	120	110	114	138	38	67	142	90	79	95	90	69	94	112	108	194	64	85	141
ENSMUSG00000026222	Sp100	ncRNA_host	chr1	85649988	85709998	+	605	697	770	759	351	407	937	673	681	860	655	486	646	704	857	1176	358	512	1003
ENSMUSG00000052760	A630001G21Rik		chr1	85717083	85778643	-	140	171	153	171	67	100	308	200	198	197	126	119	161	155	211	232	55	121	238
ENSMUSG00000036707	Cab39		chr1	85793441	85851576	+	6360	6815	6760	6923	2891	4886	6869	7209	7383	6310	6103	6109	5171	4878	6692	5971	2420	4756	4296
ENSMUSG00000026223	Itm2c		chr1	85894281	85908675	+	5194	4922	4800	6585	2951	3175	4096	3174	3792	3897	3263	2728	2728	3608	4426	4664	4328	3253	3797
ENSMUSG00000049608	Gpr55		chr1	85938318	85961007	-	58	34	22	43	20	15	31	20	22	31	39	22	19	25	26	23	8	19	19
ENSMUSG00000026229	Psmd1	overlapping_locus	chr1	86064387	86139151	+	4734	4904	4508	4867	3049	3569	5395	5989	5798	4923	4668	4469	4128	3596	4672	4814	3249	3424	2782
ENSMUSG00000062590	Armc9	overlapping_locus	chr1	86154780	86278284	+	491	563	460	543	265	365	348	378	329	291	287	279	206	314	391	403	239	282	331
ENSMUSG00000079445	B3gnt7		chr1	86302832	86307305	+	36	41	39	53	27	34	26	31	35	27	28	28	16	19	40	33	33	31	10
ENSMUSG00000026234	Ncl	ncRNA_host	chr1	86344719	86359400	-	17636	17074	16504	18339	11579	11397	20920	23093	21738	21632	20675	16758	15204	12700	17738	16451	8328	11386	12559
ENSMUSG00000073627	C130036L24Rik		chr1	86359574	86373791	+	128	106	89	127	85	81	87	63	54	90	55	59	62	110	98	139	52	73	111
ENSMUSG00000026238	Ptma		chr1	86526726	86530712	+	20233	21595	17884	22384	14050	12338	22254	20319	19913	20233	18383	14966	14955	13772	18851	17197	10495	11534	13427
ENSMUSG00000026239	Pde6d		chr1	86542994	86582629	-	721	605	659	725	400	415	477	411	486	501	345	300	352	442	490	502	337	362	492
ENSMUSG00000026240	Cops7b		chr1	86582904	86609375	+	746	688	787	849	457	468	719	710	620	595	555	519	511	515	789	674	397	462	650
ENSMUSG00000026241	Nppc		chr1	86666291	86670571	-	4	4	7	1	3	3	27	38	59	31	30	39	42	1	7	11	5	9	2
ENSMUSG00000053333	Dis3l2	overlapping_locus	chr1	86703808	87050095	+	941	904	969	972	537	697	1031	917	916	776	717	802	626	607	936	868	612	637	599
ENSMUSG00000102649	Gm38021	overlapping_locus	chr1	86893573	86895132	+	43	57	46	41	148	28	20	49	20	11	33	23	18	34	28	19	51	10	20
ENSMUSG00000084106	Gm6136		chr1	86908793	86909683	-	119	100	92	116	106	65	109	111	106	100	108	100	73	100	91	90	128	82	112
ENSMUSG00000103984	Gm37447	overlapping_locus	chr1	87036723	87039650	+	58	61	103	82	51	45	92	40	36	45	39	37	36	70	77	77	44	22	50
ENSMUSG00000101940	Akp-ps1		chr1	87067672	87071098	+	52	48	43	63	31	22	12	13	28	15	20	15	7	28	47	32	10	21	26
ENSMUSG00000026251	Chrnd		chr1	87190607	87200070	+	128	113	108	58	110	64	29	59	60	67	32	36	40	52	101	102	103	64	37
ENSMUSG00000026254	Eif4e2		chr1	87213914	87240488	+	2345	2201	2418	2869	1411	1622	2655	2517	2551	2556	2238	2081	1867	1916	2377	2218	1544	1738	2133
ENSMUSG00000026255	Efhd1		chr1	87264363	87310839	+	285	237	235	251	153	208	200	217	208	200	144	224	153	154	168	134	160	124	145
ENSMUSG00000048000	Gigyf2		chr1	87326998	87450796	+	3254	3045	3307	3905	1607	2141	3276	3243	3223	3081	2372	2520	2287	2948	3101	2897	1222	1962	2506
ENSMUSG00000026258	Snorc		chr1	87470271	87475482	+	713	662	457	773	564	340	276	196	260	200	195	105	208	364	466	401	686	314	327
ENSMUSG00000026259	Ngef	overlapping_locus	chr1	87476834	87573870	-	917	959	847	904	409	681	447	519	632	474	292	367	425	655	765	652	389	467	598
ENSMUSG00000079434	Neu2	overlapping_locus	chr1	87509889	87597845	+	200	138	150	52	155	56	160	146	166	145	75	135	160	86	115	117	73	100	71
ENSMUSG00000026288	Inpp5d		chr1	87620312	87720507	+	1085	897	1246	1571	350	582	858	855	925	974	798	615	703	877	1150	1202	555	809	1124
ENSMUSG00000026289	Atg16l1	ncRNA_host	chr1	87755870	87792428	+	1777	1890	1980	2234	1084	1249	1500	1497	1396	1447	1215	1261	1019	1358	1908	1636	822	1128	1514
ENSMUSG00000056055	Sag		chr1	87803680	87845158	+	28	55	49	62	64	34	45	17	19	31	14	20	10	56	51	49	62	39	52
ENSMUSG00000070738	Dgkd	overlapping_locus	chr1	87853287	87945180	+	2695	2467	2806	2990	1260	1701	1664	1443	1605	1519	1118	1104	1276	1914	2375	2449	1320	1599	2359
ENSMUSG00000005501	Usp40		chr1	87945119	88008551	-	1191	1092	1438	1553	614	797	1395	1195	1255	1336	925	872	967	1056	1484	1254	468	729	1233
ENSMUSG00000090124	Ugt1a7c	overlapping_locus	chr1	88095062	88220002	+	152	140	160	218	55	80	528	398	550	369	252	397	360	179	318	295	89	244	225
ENSMUSG00000090145	Ugt1a6b	overlapping_locus	chr1	88103252	88219003	+	22	46	26	38	11	19	42	32	33	35	20	25	31	26	26	27	11	21	20
ENSMUSG00000054545	Ugt1a6a	overlapping_locus	chr1	88134809	88218997	+	280	255	241	343	121	149	220	207	240	233	142	140	174	213	298	356	68	136	289
ENSMUSG00000081984	Dnajb3	overlapping_locus	chr1	88204732	88205782	-	131	154	148	171	86	123	167	135	129	136	110	89	110	105	175	140	116	113	116
ENSMUSG00000089960	Ugt1a1	overlapping_locus	chr1	88211959	88218997	+	677	701	743	949	224	538	464	560	514	423	319	358	434	654	779	667	493	540	556
ENSMUSG00000079429	Mroh2a		chr1	88226986	88262289	+	243	317	347	345	188	154	263	233	226	230	189	153	158	188	262	239	201	154	230
ENSMUSG00000044783	Hjurp		chr1	88262471	88277633	-	7045	7398	7863	9545	3872	5573	6926	5964	5948	6582	5119	4891	4521	6495	8068	7070	4405	5034	6694
ENSMUSG00000049866	Arl4c		chr1	88673125	88702221	-	4436	4879	4394	4998	1713	3203	2765	2295	2965	2482	2082	2090	2087	3216	3797	3904	2116	2548	2726
ENSMUSG00000036206	Sh3bp4	overlapping_locus	chr1	89070415	89155068	+	967	784	833	991	460	600	625	702	856	693	614	527	567	570	607	659	614	530	566
ENSMUSG00000055013	Agap1	overlapping_locus	chr1	89454806	89897617	+	1580	1379	1597	1665	694	941	1257	1084	1295	1286	1091	992	982	1019	1360	1269	926	893	1106
ENSMUSG00000044337	Ackr3		chr1	90203980	90216751	+	1826	1520	1579	1622	859	873	1270	1424	1183	1179	1062	857	946	1122	1458	1399	1037	1141	1101
ENSMUSG00000034432	Cops8		chr1	90602981	90613341	+	1778	1915	1767	1860	1100	1217	1546	1508	1530	1388	1423	1239	1201	1262	1704	1618	1179	1157	1381
ENSMUSG00000048126	Col6a3	overlapping_locus	chr1	90765923	90843971	-	14338	11246	13080	16853	6042	8540	12267	11493	11946	11267	8940	9402	8627	10207	11510	10997	5858	8027	6951
ENSMUSG00000026303	Mlph		chr1	90915085	90951142	+	283	217	226	280	74	152	209	125	141	195	116	120	138	145	160	198	158	135	238
ENSMUSG00000026304	Rab17		chr1	90958133	90969661	-	65	38	60	98	76	23	30	10	30	32	15	19	23	65	41	30	51	22	54
ENSMUSG00000026305	Lrrfip1		chr1	90998737	91128944	+	3143	2729	3035	3279	1889	2102	3781	4791	4347	3707	3585	3674	3057	2285	3479	3046	1247	2545	2430
ENSMUSG00000034353	Ramp1		chr1	91179822	91225196	+	771	864	739	955	784	501	546	389	478	581	446	419	369	475	514	650	759	513	583
ENSMUSG00000034343	Ube2f		chr1	91250304	91290337	+	1309	1425	1455	1666	704	1040	1434	1336	1332	1234	1097	1210	1084	1196	1522	1318	757	1077	1263
ENSMUSG00000026307	Scly		chr1	91298338	91321075	+	373	369	428	592	264	324	465	318	371	370	304	310	293	383	454	408	293	303	387
ENSMUSG00000026308	Klhl30		chr1	91351016	91362416	+	149	152	133	116	228	124	65	104	89	117	90	82	104	81	103	184	195	124	63
ENSMUSG00000047443	Erfe		chr1	91366430	91374217	+	11	35	18	32	17	11	58	34	38	36	28	20	29	10	28	20	11	20	13
ENSMUSG00000026309	Ilkap		chr1	91373861	91398815	-	2377	2405	2420	2850	1611	1636	1767	1692	1851	1667	1457	1385	1332	1707	2351	2108	1255	1422	2024
ENSMUSG00000067071	Hes6		chr1	91411483	91414038	-	561	585	509	728	333	381	358	294	344	344	296	271	284	427	470	555	406	359	442
ENSMUSG00000055866	Per2		chr1	91415982	91459324	-	2417	2051	2155	2619	684	883	1265	1360	1166	913	429	652	956	1687	2275	1925	527	1102	1868
ENSMUSG00000034292	Traf3ip1		chr1	91494647	91529307	+	449	342	403	477	227	309	342	307	286	350	238	281	218	338	374	295	194	276	331
ENSMUSG00000026311	Asb1		chr1	91540544	91559589	+	540	421	608	571	320	377	349	249	320	282	236	209	224	287	372	429	233	287	319
ENSMUSG00000007805	Twist2	overlapping_locus	chr1	91801461	91848028	+	241	252	223	352	95	184	248	181	146	198	155	189	140	167	173	177	202	191	197
ENSMUSG00000026313	Hdac4	overlapping_locus	chr1	91928779	92195699	-	1734	1662	1765	1889	1061	1193	1582	1683	1826	1474	1221	1130	1049	1176	1693	1541	1082	1010	1069
ENSMUSG00000026260	Ndufa10	ncRNA_host	chr1	92439010	92473860	-	3588	3621	3427	3781	2347	2726	4097	3925	3620	3819	3585	3071	2966	2932	3406	3457	3910	3022	2858
ENSMUSG00000073616	Cops9		chr1	92637145	92641985	-	1118	1272	998	1443	1167	733	1458	1072	1339	1462	1541	1003	1053	841	1159	1108	1280	843	1341
ENSMUSG00000044055	Otos		chr1	92644218	92648841	-	118	73	47	44	110	50	14	13	23	35	21	14	15	59	47	59	51	44	20
ENSMUSG00000034220	Gpc1	ncRNA_host	chr1	92831645	92860779	+	4192	3481	3286	3587	2450	2635	3819	3577	3873	3525	2907	2406	2354	2750	3199	3850	2651	2342	1798
ENSMUSG00000047067	Dusp28		chr1	92906981	92908435	+	457	427	373	554	296	302	368	262	323	288	265	268	259	359	494	384	316	292	328
ENSMUSG00000097251	5033417F24Rik		chr1	92908378	92910764	-	107	96	101	116	46	68	87	65	58	46	38	73	46	101	121	64	25	63	88
ENSMUSG00000026269	Rnpepl1		chr1	92910783	92924384	+	6329	6366	5976	7323	2655	4210	5989	5780	5939	5034	4323	4433	4159	4818	6385	5820	3854	3846	4613
ENSMUSG00000100632	9430060I03Rik		chr1	92933526	92950590	-	39	17	32	44	29	18	30	7	34	28	5	18	25	16	32	15	21	15	32
ENSMUSG00000026270	Capn10		chr1	92934376	92947941	+	1406	1564	1396	1795	695	1076	1523	1409	1425	1393	1147	1156	1002	1191	1654	1297	855	1000	1157
ENSMUSG00000026271	Gpr35		chr1	92950865	92986391	+	173	179	169	198	73	151	306	316	202	277	334	247	140	163	182	184	90	144	143
ENSMUSG00000014602	Kif1a		chr1	93015464	93101951	-	399	268	383	385	201	247	195	187	197	150	136	109	136	165	264	204	236	176	188
ENSMUSG00000034159	Mab21l4		chr1	93151349	93160948	-	1267	1071	1165	1626	417	612	1815	1763	1883	1457	1041	1240	1429	1000	1366	1278	515	802	1004
ENSMUSG00000084989	Crocc2		chr1	93168725	93231072	+	104	80	87	131	59	86	50	86	95	93	49	76	49	81	137	84	27	76	50
ENSMUSG00000047793	Sned1	ncRNA_host	chr1	93235841	93301065	+	4934	3213	4893	6114	1578	3035	3187	2796	2789	2764	1407	1654	1911	3364	4260	3451	919	1952	3486
ENSMUSG00000026273	Mterf4		chr1	93299211	93305915	-	379	418	408	394	210	235	402	341	265	334	277	295	261	291	326	408	200	261	296
ENSMUSG00000026274	Pask		chr1	93308770	93343482	-	292	265	260	341	151	212	380	306	274	431	278	285	219	229	279	202	140	188	187
ENSMUSG00000026275	Ppp1r7	ncRNA_host	chr1	93342854	93373489	+	1477	1391	1512	1652	872	1045	1446	1464	1430	1386	1231	1082	1128	1057	1286	1311	800	993	1056
ENSMUSG00000034107	Ano7		chr1	93373930	93404303	+	708	581	575	775	138	400	797	572	694	661	271	366	504	581	850	714	165	319	687
ENSMUSG00000034088	Hdlbp		chr1	93405940	93478815	-	14984	13305	14111	15415	6589	10584	14891	15309	15019	13682	12084	11887	11291	11426	13835	13491	8379	9929	9487
ENSMUSG00000026276	Septin2		chr1	93478964	93510260	+	208	160	171	195	96	110	144	149	134	132	114	114	103	149	165	186	45	119	196
ENSMUSG00000034066	Farp2	overlapping_locus	chr1	93512079	93621976	+	442	463	503	555	173	296	354	416	438	329	265	305	199	395	409	395	198	273	265
ENSMUSG00000026277	Stk25		chr1	93619751	93658659	-	3418	2983	3498	3848	1906	2299	3026	2920	2450	2613	2236	2207	2141	2687	3133	2895	1885	2312	3344
ENSMUSG00000026278	Bok		chr1	93685660	93695764	+	2595	2620	1986	2477	1528	1778	2456	2734	2488	2070	2404	2004	1501	1479	2827	2079	1836	1600	1390
ENSMUSG00000026279	Thap4		chr1	93701935	93754864	-	1129	1272	1055	1336	666	880	1332	1297	1287	1121	1156	1122	982	867	1158	1205	978	810	810
ENSMUSG00000026280	Atg4b		chr1	93751500	93790610	+	2091	1966	1995	2164	907	1396	1844	1725	1866	1881	1529	1538	1296	1504	1754	1823	1125	1277	1532
ENSMUSG00000026281	Dtymk		chr1	93792576	93801934	-	1039	1154	921	1468	764	732	1113	1077	1082	1111	990	742	744	794	1006	931	691	667	897
ENSMUSG00000026283	Ing5		chr1	93803965	93822101	+	1140	1085	1091	1226	552	788	1153	1181	1150	1208	964	1092	859	858	1239	981	514	792	925
ENSMUSG00000073609	D2hgdh		chr1	93824909	93852348	+	468	380	402	461	243	350	372	358	359	372	223	273	327	449	351	428	253	262	343
ENSMUSG00000026285	Pdcd1		chr1	94038305	94052553	-	18	5	0	2	8	4	58	88	20	61	50	36	41	27	45	14	11	30	22
ENSMUSG00000051185	Fam174a	overlapping_locus	chr1	95313623	95335284	+	1269	1169	1049	1350	612	877	836	856	970	729	647	611	616	878	1055	1001	621	769	896
ENSMUSG00000103973	BC055308	overlapping_locus	chr1	95328681	95331218	+	40	42	46	72	40	30	25	26	22	33	19	31	25	41	30	21	30	12	23
ENSMUSG00000081051	Gm15427	pseudo_consens	chr1	95498621	95499151	+	333	522	330	492	451	282	384	356	308	376	307	301	292	343	486	347	504	273	394
ENSMUSG00000040710	St8sia4	overlapping_locus	chr1	95587682	95667571	-	337	286	448	448	95	181	221	178	296	318	206	215	188	222	301	365	85	252	401
ENSMUSG00000040693	Slco4c1		chr1	96816270	96872171	-	27	5	10	7	8	4	66	34	51	47	23	22	31	6	20	9	1	7	6
ENSMUSG00000044768	D1Ertd622e		chr1	97606318	97662074	-	586	531	482	582	267	367	573	664	621	578	540	450	452	435	666	535	254	434	419
ENSMUSG00000040648	Ppip5k2		chr1	97706048	97770411	-	1121	933	1219	1184	451	802	1351	1168	1212	1222	991	958	890	1049	1222	1018	273	761	867
ENSMUSG00000026333	Gin1		chr1	97770172	97793709	+	238	373	384	322	198	221	292	215	291	269	221	204	219	199	323	322	117	194	285
ENSMUSG00000026335	Pam	overlapping_locus	chr1	97795114	98095646	-	17999	15330	17712	17412	8719	10425	8189	8267	9970	9157	6623	5298	6578	10941	11401	12258	9665	9173	8656
ENSMUSG00000089782	Gm3531	overlapping_locus	chr1	97948901	97949389	-	166	162	193	168	105	129	207	213	167	208	210	175	174	135	145	158	144	146	178
ENSMUSG00000089706	B230216N24Rik	overlapping_locus	chr1	98031116	98057680	-	71	52	56	65	60	49	44	55	36	27	30	29	34	77	71	40	11	23	77
ENSMUSG00000047496	Rnf152		chr1	105276914	105356710	-	396	247	319	473	175	162	394	303	425	315	255	274	284	206	284	300	100	113	199
ENSMUSG00000067017	Capza1-ps1		chr1	105455971	105458829	+	23	20	31	30	15	23	25	41	42	39	22	27	26	24	16	24	13	20	25
ENSMUSG00000056536	Pign	overlapping_locus	chr1	105518422	105663677	-	1111	1217	1272	1340	534	890	1426	1428	1328	1231	958	979	864	1046	1441	1250	342	828	1013
ENSMUSG00000026319	Relch	overlapping_locus	chr1	105663861	105755191	+	2582	2783	2852	3244	1201	1795	2945	2640	3062	2714	2125	2363	1925	2088	2860	2584	781	1630	2159
ENSMUSG00000026321	Tnfrsf11a		chr1	105780718	105847981	+	902	809	1053	1083	318	622	656	627	678	591	369	321	486	907	940	829	288	418	827
ENSMUSG00000099843	Gm7160		chr1	105979350	105990282	-	211	197	203	225	90	144	199	152	173	149	87	115	107	179	243	172	82	127	197
ENSMUSG00000038866	Zcchc2		chr1	105990406	106034074	+	2309	1998	2057	2325	772	1420	1894	1917	1731	1690	1349	1516	1282	1745	2196	1833	614	1274	1654
ENSMUSG00000044340	Phlpp1	overlapping_locus	chr1	106171752	106394250	+	1178	1052	1038	1154	367	800	1027	992	1021	922	680	699	675	834	822	925	496	610	623
ENSMUSG00000057329	Bcl2	overlapping_locus	chr1	106538178	106714274	-	911	709	930	1154	599	543	618	456	512	564	444	418	391	583	645	676	547	472	685
ENSMUSG00000009905	Kdsr		chr1	106720459	106759727	-	2639	2687	2407	3271	1487	1963	2559	2448	2265	2339	1790	2026	1753	2198	3148	2335	1265	1881	2249
ENSMUSG00000009907	Vps4b		chr1	106764071	106796728	-	4224	4430	4528	4885	1661	3155	4903	4650	4702	4184	3830	4037	3366	3562	4548	4336	1775	3052	3154
ENSMUSG00000067006	Serpinb5		chr1	106861173	106883348	+	16304	17883	16823	16684	5441	11597	16980	18330	17072	14175	13925	15644	14190	12610	15645	14762	5769	10407	11636
ENSMUSG00000059956	Serpinb12		chr1	106934449	106957080	+	2910	3626	3388	3911	985	2283	7269	9122	9370	5584	4683	7537	6137	3147	4654	4269	1279	2746	2382
ENSMUSG00000048775	Serpinb13		chr1	106980984	107001195	+	664	565	700	707	171	445	508	438	346	412	216	389	361	624	723	566	96	315	592
ENSMUSG00000084228	Gm8080		chr1	107020137	107025325	-	136	246	195	232	134	111	1293	994	1007	1375	827	828	735	527	728	474	99	328	362
ENSMUSG00000044594	Serpinb3a		chr1	107045587	107052303	-	61	75	130	140	167	102	3766	3941	3151	3096	2674	2646	2584	288	998	481	154	414	219
ENSMUSG00000073602	Serpinb3b		chr1	107153940	107278361	-	4023	4259	4589	5121	2068	3478	7090	6955	6310	7464	4568	5609	4708	4949	6439	4619	1110	3196	4972
ENSMUSG00000026327	Serpinb11		chr1	107361198	107380475	+	461	415	528	523	240	322	849	917	896	635	649	797	625	338	575	428	221	304	300
ENSMUSG00000067001	Serpinb7		chr1	107399655	107452689	+	5519	5402	5195	5156	1434	3134	2451	2882	2551	2404	1547	2564	2428	3691	3964	3635	1029	2333	3377
ENSMUSG00000062345	Serpinb2	overlapping_locus	chr1	107511423	107535478	+	5475	5400	4903	4559	1902	3336	3683	4908	4414	3121	3856	4630	3625	3391	4931	5199	1641	3961	3028
ENSMUSG00000092572	Serpinb10	overlapping_locus	chr1	107529003	107549271	+	1147	755	819	882	363	499	687	800	809	567	700	567	634	545	790	864	326	477	721
ENSMUSG00000026315	Serpinb8		chr1	107590006	107610484	+	4809	4430	4980	4769	1841	3345	4827	5095	4813	4089	3512	4417	4004	3820	5180	4359	1312	3076	3613
ENSMUSG00000047216	Cdh19	overlapping_locus	chr1	110888326	110977584	-	656	356	502	613	194	330	154	199	220	183	123	136	201	350	346	317	145	210	275
ENSMUSG00000100555	Gm8173	pseudo_consens	chr1	111804934	111807775	-	15	25	28	24	88	25	12	21	10	23	13	17	9	19	12	12	20	17	9
ENSMUSG00000038702	Dsel		chr1	111858702	111864918	-	1333	1296	1520	1512	602	914	1192	1216	1236	1174	979	918	862	990	1191	1136	379	856	941
ENSMUSG00000026374	Tsn		chr1	118294778	118311739	-	2755	2717	2558	3195	2120	2002	2596	2423	2679	2370	2137	1949	1730	1992	2289	2501	2087	1876	1997
ENSMUSG00000026377	Nifk		chr1	118321839	118333822	+	1093	1137	1020	1165	761	785	1230	1503	1250	1262	1316	1142	946	863	1177	1024	720	872	751
ENSMUSG00000064302	Clasp1		chr1	118389058	118612678	+	3937	3199	3618	3821	1483	2465	3625	3783	3853	3242	2508	2724	2347	2662	3396	3183	1482	2159	2137
ENSMUSG00000026380	Tfcp2l1	ncRNA_host	chr1	118627945	118685168	+	131	87	96	124	71	84	77	65	93	104	89	83	58	84	62	119	62	85	66
ENSMUSG00000048402	Gli2		chr1	118834132	119053619	-	759	673	741	762	252	414	642	545	709	574	403	485	382	469	517	535	332	346	352
ENSMUSG00000037035	Inhbb		chr1	119415465	119422248	-	1730	1444	1677	1716	686	1047	1616	1534	1536	1505	1107	1143	1059	1173	1331	1240	967	1054	1380
ENSMUSG00000004451	Ralb		chr1	119470305	119504794	-	1244	1202	1336	1410	632	802	1435	1513	1385	1344	1163	1082	1059	921	1241	1049	675	839	976
ENSMUSG00000098923	Tmem185b	retrogene	chr1	119526160	119528983	+	438	400	395	538	197	271	521	450	357	379	348	300	332	377	414	408	245	276	302
ENSMUSG00000026383	Epb41l5	overlapping_locus	chr1	119545037	119649000	-	680	651	736	656	238	447	662	543	627	588	445	514	458	515	606	610	203	467	509
ENSMUSG00000026384	Ptpn4	overlapping_locus	chr1	119652467	119837613	-	1446	1167	1828	1418	485	748	1195	1090	1143	1033	782	853	737	1000	1162	1084	303	717	1011
ENSMUSG00000036975	Tmem177		chr1	119907890	119913208	-	1077	953	1085	1265	480	738	352	285	289	271	189	309	268	720	605	774	351	533	641
ENSMUSG00000026387	Sctr		chr1	120006894	120063536	+	54	29	33	28	32	22	29	5	23	12	10	5	3	19	23	18	31	16	49
ENSMUSG00000050777	Tmem37		chr1	120067377	120074074	-	141	81	111	134	75	60	63	89	126	78	69	67	57	67	125	95	74	113	127
ENSMUSG00000026385	Dbi		chr1	120113280	120121078	-	4248	4774	3488	4167	2862	2754	4104	3825	3817	3625	3289	3238	3076	2792	3567	3336	2417	2514	2795
ENSMUSG00000026388	3110009E18Rik		chr1	120121187	120188189	+	67	68	45	51	26	34	63	47	54	59	57	47	45	48	66	50	42	43	55
ENSMUSG00000026389	Steap3		chr1	120190757	120272705	-	2301	1862	2270	2869	1092	1229	1832	1478	1635	1749	1219	889	1315	1461	1727	1964	1403	1269	1573
ENSMUSG00000026390	Marco		chr1	120474538	120505024	-	134	38	92	181	15	23	156	131	321	136	56	28	357	167	94	383	74	41	308
ENSMUSG00000003721	Insig2		chr1	121304353	121332589	-	2558	2224	2224	2724	1325	2175	2367	2332	2539	2292	1993	1950	1756	1906	2556	2363	1192	1908	2208
ENSMUSG00000104253	Gm37174		chr1	121328092	121331149	+	68	50	66	101	28	45	72	31	52	46	25	36	31	61	48	55	13	38	75
ENSMUSG00000026339	Ccdc93		chr1	121431049	121506460	+	1303	1130	1325	1408	568	897	1249	1078	961	966	759	809	713	1207	1275	1179	492	747	1099
ENSMUSG00000001674	Ddx18		chr1	121553835	121567989	-	791	917	789	805	565	547	834	795	803	772	826	670	597	653	829	683	550	568	579
ENSMUSG00000026341	Actr3		chr1	125392905	125435727	-	6719	6630	6577	7147	3167	4633	7977	8213	8084	7760	7242	6373	6078	5477	7146	6364	3144	4904	5237
ENSMUSG00000026342	Slc35f5		chr1	125560595	125595820	+	3054	3156	3348	3596	1478	2284	3077	2586	2671	2238	1821	1996	2093	3030	3377	2934	1124	1976	2810
ENSMUSG00000049690	Nckap5	overlapping_locus	chr1	125913620	126830799	-	123	59	78	74	39	42	128	127	147	123	98	99	84	52	36	63	25	37	70
ENSMUSG00000036155	Mgat5	overlapping_locus	chr1	127205015	127488336	+	1573	1550	1550	1932	532	1035	1585	1296	1326	1308	991	1157	963	1206	1314	1338	669	869	994
ENSMUSG00000026349	Ccnt2		chr1	127774164	127808061	+	3269	2953	3438	3824	1814	2111	2722	2583	2453	2673	1946	1982	1943	2608	3165	2676	852	1737	2895
ENSMUSG00000036104	Rab3gap1		chr1	127868773	127943868	+	2652	2443	2565	2808	1173	1820	2297	2206	2278	2199	1711	1804	1725	1844	2149	2304	1290	1549	1591
ENSMUSG00000036086	Zranb3	overlapping_locus	chr1	127954184	128103047	-	179	162	196	255	117	138	190	163	166	179	169	129	129	165	174	145	88	119	136
ENSMUSG00000058603	Rpl28-ps1		chr1	128038569	128038982	+	4	33	27	29	32	14	24	37	30	31	20	20	22	25	14	18	46	19	30
ENSMUSG00000056211	R3hdm1	overlapping_locus	chr1	128103301	128237736	+	2050	1496	2018	2142	1024	1324	1585	1514	1550	1633	1249	1272	1058	1533	1604	1621	764	1184	1450
ENSMUSG00000026353	Ubxn4		chr1	128243964	128279378	+	4021	3708	3949	4044	2720	2599	3742	3917	3645	3470	3038	2879	2864	3235	4005	3488	1925	2801	2969
ENSMUSG00000026355	Mcm6		chr1	128331590	128359664	-	1870	2243	1803	2253	995	1281	2734	2476	2582	2676	2352	1546	1642	1267	1884	1803	1176	1251	1093
ENSMUSG00000026356	Dars		chr1	128363707	128417368	-	2117	2141	2140	2100	1133	1437	2216	2410	2375	2077	1902	1713	1628	1677	1973	2061	802	1413	1452
ENSMUSG00000045382	Cxcr4		chr1	128588199	128592293	-	106	122	139	185	65	97	247	211	272	272	248	204	179	124	209	176	147	136	129
ENSMUSG00000042581	Thsd7b	overlapping_locus	chr1	129273302	130219278	+	44	27	36	30	24	25	13	10	6	13	4	4	5	13	7	23	21	24	4
ENSMUSG00000087691	Cd55os		chr1	130422824	130437914	+	211	130	235	175	79	95	128	112	78	104	54	47	88	151	210	157	36	76	235
ENSMUSG00000086825	Gm15675		chr1	130429781	130437191	-	708	575	760	692	343	363	466	398	367	485	247	255	447	606	797	563	180	318	957
ENSMUSG00000026399	Cd55		chr1	130439027	130462744	-	1540	1265	1787	1845	457	795	1015	905	926	1050	525	625	893	1290	1376	1298	335	755	1551
ENSMUSG00000026409	Pfkfb2	overlapping_locus	chr1	130689182	130729253	-	1593	1494	1720	1870	626	981	1073	997	1088	992	654	739	738	1169	1516	1366	341	773	1260
ENSMUSG00000046404	Yod1		chr1	130717327	130724358	+	2696	2485	2904	2510	1486	1643	3130	3502	3791	2874	2204	3401	2436	1980	3120	2439	801	1634	2068
ENSMUSG00000104515	Gm37163	overlapping_locus	chr1	130727132	130728821	-	22	29	23	33	62	12	40	18	19	26	30	19	19	24	25	31	15	23	27
ENSMUSG00000042510	AA986860		chr1	130731976	130744622	+	2223	2474	2470	2676	881	1739	2544	3035	2473	2281	1767	2383	2092	2262	2472	2278	1040	1848	1958
ENSMUSG00000099556	Gm28857		chr1	130740162	130741327	-	34	25	32	33	23	24	49	52	45	45	36	42	42	52	48	39	19	34	42
ENSMUSG00000100106	Gm28856		chr1	130766384	130784433	+	74	76	74	92	11	50	50	63	82	47	25	52	44	90	106	74	17	61	79
ENSMUSG00000026415	Fcamr		chr1	130800902	130814740	+	148	133	119	203	48	134	189	100	123	155	89	101	125	128	199	166	26	119	159
ENSMUSG00000086706	Gm15848		chr1	130809977	130824084	-	89	86	83	99	55	79	99	90	82	65	72	72	87	86	117	89	42	55	67
ENSMUSG00000026417	Pigr		chr1	130826684	130852249	+	58	24	33	52	37	39	16	10	17	17	12	15	14	36	45	24	21	29	23
ENSMUSG00000016529	Il10		chr1	131019845	131024974	+	4	6	11	11	6	8	29	50	39	40	26	16	32	13	37	35	5	10	31
ENSMUSG00000016528	Mapkapk2	overlapping_locus	chr1	131053700	131097826	-	4790	4595	4604	5011	2500	3111	4630	4993	4821	4660	4389	3628	3680	3488	4855	4512	3399	3376	3565
ENSMUSG00000016526	Dyrk3		chr1	131127455	131138340	-	43	47	44	43	31	49	78	86	82	81	102	97	71	30	59	70	65	61	34
ENSMUSG00000026427	Eif2d		chr1	131153181	131187658	+	1352	1450	1390	1734	681	983	1449	1467	1358	1320	1070	1070	1037	1088	1389	1275	896	972	1173
ENSMUSG00000026430	Rassf5		chr1	131176410	131245258	-	2741	2502	2650	2836	840	1864	2016	2054	2054	1745	1539	2156	1692	2158	2628	2458	890	1477	1958
ENSMUSG00000101729	Gm17796	pseudo_consens	chr1	131216877	131218089	+	32	65	45	23	9	24	7	38	29	19	15	38	17	20	23	45	9	9	27
ENSMUSG00000042349	Ikbke		chr1	131254343	131279606	-	1296	1119	1263	1553	753	895	1652	1354	1228	1557	995	944	1095	1353	1609	1419	627	849	1373
ENSMUSG00000102055	Gm28913		chr1	131263330	131266749	+	25	28	13	35	13	15	22	24	18	14	4	9	23	39	45	24	7	12	32
ENSMUSG00000026425	Srgap2	overlapping_locus	chr1	131285251	131527352	-	6447	5556	6358	6496	2125	3990	3758	3582	3552	3164	2251	2802	2834	4414	5142	4852	1614	2941	4595
ENSMUSG00000055184	Fam72a		chr1	131527903	131539872	+	51	71	53	91	43	66	63	47	54	55	47	63	45	80	95	94	38	38	52
ENSMUSG00000004552	Ctse		chr1	131638306	131675505	+	10	1	9	16	6	8	451	269	355	326	299	269	214	5	15	16	5	24	13
ENSMUSG00000052688	Rab7b		chr1	131688695	131715439	+	3064	2643	2969	3336	1747	1639	2616	2624	2482	2380	1848	1537	2050	2011	2916	2573	1596	1707	2195
ENSMUSG00000042268	Slc26a9		chr1	131744022	131771504	+	335	419	327	368	162	346	915	972	995	767	917	835	573	316	465	426	144	341	269
ENSMUSG00000042251	Pm20d1		chr1	131797381	131821473	+	60	70	69	80	54	35	161	107	142	132	83	129	88	69	45	54	38	18	37
ENSMUSG00000013275	Slc41a1		chr1	131827493	131848865	+	2642	2554	2704	2674	1864	1614	2619	2789	2457	2348	2040	1985	1735	1984	2159	2228	1440	1706	1600
ENSMUSG00000026433	Rab29		chr1	131867224	131872887	+	349	387	351	432	218	279	471	379	364	426	365	305	287	314	377	373	209	286	384
ENSMUSG00000026434	Nucks1	overlapping_locus	chr1	131910534	131936321	+	2837	2717	2741	3010	3452	2138	3225	3242	2969	3161	3174	2369	2344	1991	2652	2505	2215	1870	1739
ENSMUSG00000026435	Slc45a3	overlapping_locus	chr1	131962967	131982969	+	628	473	605	800	274	388	601	542	628	552	409	414	395	481	608	505	316	469	641
ENSMUSG00000026436	Elk4	overlapping_locus	chr1	132007607	132032612	+	2995	3054	2997	3076	1951	1956	2730	2527	2807	2548	2243	2035	1862	2131	2827	2705	1842	1879	2073
ENSMUSG00000059149	Mfsd4a		chr1	132022806	132068062	-	1409	1224	1402	1495	524	816	1104	1041	1276	1160	850	875	764	889	1267	1252	494	801	895
ENSMUSG00000026437	Cdk18		chr1	132112237	132139684	-	99	107	113	155	55	71	134	114	107	91	105	115	94	72	122	119	97	97	107
ENSMUSG00000042115	Klhdc8a		chr1	132298626	132307357	+	77	84	48	66	31	50	143	140	117	143	103	97	83	32	78	62	46	44	51
ENSMUSG00000009772	Nuak2		chr1	132316126	132333488	+	1182	1089	1229	1216	438	518	1142	1070	1102	952	760	814	889	748	1004	938	498	613	708
ENSMUSG00000100658	F730311O21Rik		chr1	132342023	132349626	+	44	22	29	45	9	34	60	64	29	45	30	30	35	50	67	39	12	34	53
ENSMUSG00000042066	Tmcc2		chr1	132356315	132391281	-	740	569	653	846	424	407	417	390	471	400	312	254	276	431	568	579	464	419	553
ENSMUSG00000042046	Dstyk		chr1	132417555	132466958	+	3053	2747	3278	3441	1522	1946	2431	2276	2657	2332	1716	1796	1716	2199	2883	2581	1340	1587	2133
ENSMUSG00000097760	6030442K20Rik		chr1	132466433	132477064	-	29	60	42	35	29	34	29	29	29	10	25	16	18	28	84	26	13	25	26
ENSMUSG00000026439	Rbbp5		chr1	132477365	132505659	+	1462	1367	1331	1522	609	954	1283	1189	1225	1258	960	970	810	1159	1352	1118	590	848	1028
ENSMUSG00000048174	Tmem81		chr1	132506230	132508639	+	276	316	237	293	191	181	246	218	174	204	130	132	149	209	320	199	127	153	230
ENSMUSG00000026442	Nfasc		chr1	132564690	132741797	-	340	297	399	407	156	182	288	212	166	304	143	133	132	205	277	215	142	166	206
ENSMUSG00000026443	Lrrn2		chr1	132880273	132940005	+	72	63	77	72	20	66	50	25	51	52	35	30	35	37	55	56	59	36	33
ENSMUSG00000054387	Mdm4		chr1	132959484	133030561	-	7372	6304	8387	8942	3675	4920	6115	5547	5166	6032	3986	4322	4119	6096	7181	6415	1887	3953	7382
ENSMUSG00000026447	Pik3c2b		chr1	133045667	133108687	+	765	711	794	1132	455	617	989	862	942	817	535	641	543	832	894	825	409	479	628
ENSMUSG00000046062	Ppp1r15b		chr1	133131143	133139783	+	2380	2240	2641	2897	1255	1724	2522	2485	2284	2394	2286	2037	1717	1872	2360	2455	1356	1898	1859
ENSMUSG00000041757	Plekha6		chr1	133164210	133303435	+	2918	3033	3506	3743	1034	1787	2392	2118	2114	2254	1510	1606	1485	2409	2760	2577	1062	1530	2278
ENSMUSG00000070644	Etnk2		chr1	133363572	133380336	+	215	153	158	177	163	127	69	76	80	92	65	49	64	98	187	144	173	121	80
ENSMUSG00000070643	Sox13		chr1	133382303	133424377	-	607	543	502	699	282	381	810	692	746	643	596	622	501	515	587	379	405	403	403
ENSMUSG00000090553	Snrpe		chr1	133603871	133610291	-	871	1064	902	967	721	653	1236	1013	1149	1217	1269	885	887	672	935	842	606	641	847
ENSMUSG00000102976	Zc3h11a	overlapping_locus	chr1	133619862	133661380	-	669	519	646	776	189	396	504	567	557	514	359	413	378	580	679	555	130	376	558
ENSMUSG00000094410	Gm38394	overlapping_locus	chr1	133619940	133661318	-	1775	1201	2148	2193	402	1088	1822	1580	1663	1494	1030	1202	935	1354	2084	1500	292	934	1546
ENSMUSG00000051998	Lax1		chr1	133679091	133690108	-	121	74	84	113	68	67	75	76	64	70	70	62	66	81	88	88	43	45	101
ENSMUSG00000026463	Atp2b4	overlapping_locus	chr1	133699457	133801041	-	14735	12393	15197	15424	5984	9490	9288	9609	9198	7748	4775	6562	6636	11141	11572	11215	4845	6753	9266
ENSMUSG00000010311	Optc		chr1	133897199	133907999	-	188	170	248	359	79	104	150	77	112	93	17	45	62	236	234	167	33	76	265
ENSMUSG00000041577	Prelp		chr1	133910304	133921414	-	10753	7387	11736	10014	3308	5105	4426	4617	4909	4530	3253	2431	4025	6658	7498	7516	5823	5661	7666
ENSMUSG00000041559	Fmod		chr1	134037254	134048277	+	17679	14154	16211	18249	9552	11062	6966	6935	8713	7312	5600	4750	6731	10720	11462	12605	13790	10610	8549
ENSMUSG00000020423	Btg2		chr1	134075170	134079120	-	2357	2105	2243	2802	969	1694	3109	2688	3013	2456	1975	2278	1882	2254	2729	2165	1287	1703	2097
ENSMUSG00000026450	Chit1		chr1	134111242	134151540	+	5090	6350	5152	5658	2438	3590	14443	14824	11534	10519	9876	10600	9226	6295	8978	6581	4491	5696	4138
ENSMUSG00000064246	Chil1		chr1	134182176	134190181	+	836	855	1060	1058	839	733	12869	13650	9222	10839	11276	10133	7604	2707	5193	2747	3222	3531	1448
ENSMUSG00000042451	Mybph		chr1	134193448	134201232	+	93	114	98	80	60	45	198	219	164	168	65	86	242	114	143	251	45	120	122
ENSMUSG00000042429	Adora1		chr1	134199223	134235431	-	272	228	298	354	228	237	96	77	93	79	50	63	94	122	189	132	239	146	261
ENSMUSG00000026458	Ppfia4		chr1	134296783	134332928	-	1045	1039	1342	1446	459	593	342	225	318	353	208	205	221	717	969	877	343	445	800
ENSMUSG00000042305	Tmem183a		chr1	134346097	134361979	-	2658	2793	2849	3225	1347	1751	2647	2308	2550	2466	2103	1870	1796	1953	2570	2424	1362	1688	2220
ENSMUSG00000026456	Cyb5r1		chr1	134405559	134411740	+	1382	1375	1459	1515	1035	988	1301	1201	1089	1309	1013	853	886	1045	1259	1222	801	898	1249
ENSMUSG00000026457	Adipor1		chr1	134415378	134433351	+	8894	9049	8943	9717	3998	6301	7869	7176	8000	6895	6188	6634	5831	6755	8394	7774	5297	6053	6753
ENSMUSG00000026455	Klhl12		chr1	134455531	134491018	+	1363	1324	1346	1530	751	933	1108	1051	1041	1047	869	894	803	867	1208	1093	543	794	963
ENSMUSG00000042229	Rabif	ncRNA_host	chr1	134494648	134508774	+	1168	1098	1173	1265	522	805	1208	1273	969	1016	979	952	856	842	1168	872	659	829	894
ENSMUSG00000042207	Kdm5b		chr1	134560171	134635285	+	3077	2770	3002	3020	1223	1968	3915	3656	3340	2831	2443	2657	2450	2944	2963	2712	1355	1818	2069
ENSMUSG00000073557	Ppp1r12b	overlapping_locus	chr1	134754658	134955942	-	3960	2893	3606	3108	2329	2084	1651	1783	1922	1717	1259	1163	1495	2057	2272	2719	1659	1722	1857
ENSMUSG00000026429	Ube2t		chr1	134962565	134974162	+	152	140	157	195	100	107	214	162	158	173	148	99	102	132	171	106	96	103	87
ENSMUSG00000042793	Lgr6		chr1	134983301	135105276	-	4250	3935	3840	4406	1707	2460	2358	2192	2162	2575	1389	1489	1719	3110	3690	3029	2173	2149	2847
ENSMUSG00000097993	Ptprv		chr1	135108497	135132594	-	202	262	180	432	130	187	404	296	358	289	198	337	185	241	298	208	91	97	184
ENSMUSG00000031506	Ptpn7		chr1	135132700	135145317	+	339	316	414	428	163	190	365	371	272	297	298	199	228	320	368	303	198	213	335
ENSMUSG00000026426	Arl8a	overlapping_locus	chr1	135146824	135156269	+	1939	1773	1855	2142	996	1239	1478	1251	1373	1398	1153	1056	1147	1370	1733	1598	1172	1364	1741
ENSMUSG00000085311	Gm15445	overlapping_locus	chr1	135152963	135153806	+	24	31	37	28	36	25	33	13	41	31	33	27	18	43	26	29	17	19	29
ENSMUSG00000026424	Gpr37l1		chr1	135160234	135167681	-	95	75	86	101	86	81	44	60	31	43	45	28	33	48	47	99	103	40	44
ENSMUSG00000079139	Gm4204	pseudo_consens	chr1	135231995	135233225	+	46	61	48	52	23	31	70	81	59	70	75	49	56	35	25	46	23	52	50
ENSMUSG00000097680	Gm26642		chr1	135248561	135266443	+	122	140	152	95	81	77	112	112	96	140	85	83	98	129	96	101	46	63	109
ENSMUSG00000003051	Elf3		chr1	135253575	135258568	-	23	24	41	45	53	23	180	145	103	145	204	112	78	25	71	39	66	39	24
ENSMUSG00000041926	Rnpep		chr1	135262712	135284084	-	1397	1244	1347	1558	1014	895	2233	1930	1747	2278	1960	1344	1420	1343	1493	1515	917	950	1306
ENSMUSG00000062580	Timm17a		chr1	135295213	135313778	-	1394	1444	1410	1414	1216	961	1190	1427	1279	1307	1400	1058	1021	878	1219	1293	1020	938	983
ENSMUSG00000048096	Lmod1		chr1	135324807	135368065	+	272	192	266	238	270	162	99	138	125	111	88	107	129	108	125	174	197	151	141
ENSMUSG00000041889	Shisa4		chr1	135371057	135375237	-	531	520	484	396	709	310	208	265	242	321	146	144	251	304	296	497	362	323	251
ENSMUSG00000041879	Ipo9	overlapping_locus	chr1	135382312	135430499	-	2355	2332	2374	2760	1324	1633	2100	2041	2162	2196	1821	1471	1487	1712	2099	2049	1208	1462	1682
ENSMUSG00000009418	Nav1	overlapping_locus	chr1	135434580	135688105	-	4366	3718	5173	5326	2830	3485	2789	2675	3149	2654	1970	2104	2117	2687	4408	3681	2307	2528	3572
ENSMUSG00000026421	Csrp1		chr1	135720061	135752232	+	9063	7935	7766	9547	6304	5383	6373	5970	6118	6051	5366	4500	4800	5871	6824	6770	7999	5703	5931
ENSMUSG00000041801	Phlda3		chr1	135766119	135769136	+	3306	2894	2499	2997	2041	1952	2642	2806	2268	2295	2106	1864	1867	2264	2676	2265	2454	1846	2042
ENSMUSG00000026418	Tnni1		chr1	135779434	135810989	+	707	431	414	484	727	311	168	207	315	202	146	169	211	295	273	553	525	405	246
ENSMUSG00000041782	Lad1		chr1	135818598	135833342	+	8730	8798	7749	8316	2544	5661	9764	10939	9870	7984	8505	8063	7197	6578	8457	7571	4584	5818	4894
ENSMUSG00000026414	Tnnt2		chr1	135836354	135852260	+	1214	1297	908	1331	647	805	261	295	382	284	232	337	262	706	692	721	392	500	668
ENSMUSG00000026413	Pkp1	overlapping_locus	chr1	135871395	135919207	-	59391	62098	52314	55122	18258	40156	65821	72711	70396	53700	55517	58040	49408	44308	54523	55214	23368	36050	30819
ENSMUSG00000102414	Gm36938	overlapping_locus	chr1	135896394	135899089	-	38	16	50	71	2	17	43	52	66	55	25	38	20	27	41	18	8	18	37
ENSMUSG00000051985	Igfn1		chr1	135953578	136006342	-	99	124	164	46	182	45	18	7	19	39	34	31	20	38	61	41	34	52	25
ENSMUSG00000026411	Tmem9		chr1	136008150	136035342	+	827	921	956	1166	538	586	824	653	744	745	698	609	537	631	719	822	705	551	720
ENSMUSG00000026407	Cacna1s	overlapping_locus	chr1	136052750	136119822	+	2483	1526	1942	1081	1972	1171	696	897	945	851	442	489	971	937	1104	1542	1116	1271	792
ENSMUSG00000041642	Kif21b		chr1	136131389	136177998	+	447	307	392	585	157	305	507	455	490	511	392	466	318	281	375	452	204	242	347
ENSMUSG00000087230	Mroh3		chr1	136181652	136212828	-	31	37	26	54	34	30	89	92	73	88	47	86	82	39	48	39	15	40	75
ENSMUSG00000041605	Inava		chr1	136213531	136234264	-	1458	1564	1444	1636	497	980	1700	1781	1616	1546	1333	1457	1172	1141	1521	1239	764	979	1019
ENSMUSG00000041570	Camsap2		chr1	136268123	136346104	-	3364	2725	3271	3416	1249	2252	2762	3130	3048	2931	2402	2603	2152	2555	2846	2735	968	2072	2092
ENSMUSG00000097403	9230116N13Rik		chr1	136411916	136415519	-	99	106	141	171	57	74	90	66	61	64	62	62	54	99	119	99	48	94	73
ENSMUSG00000026404	Ddx59		chr1	136415271	136440158	+	346	411	352	385	218	313	449	361	374	372	338	328	246	280	360	371	197	265	261
ENSMUSG00000041498	Kif14	overlapping_locus	chr1	136466343	136531511	+	131	172	159	220	103	151	437	375	454	423	450	361	252	123	143	167	127	158	83
ENSMUSG00000041483	Zfp281		chr1	136624901	136630053	+	686	631	712	669	393	426	547	461	459	506	361	336	360	405	687	537	274	411	454
ENSMUSG00000026398	Nr5a2		chr1	136842571	136960448	-	53	23	37	54	13	25	41	14	17	25	16	20	18	35	23	57	17	20	33
ENSMUSG00000098206	Mir181a-1hg	overlapping_locus	chr1	137966531	137969918	+	41	65	58	85	55	30	26	42	67	40	33	21	30	46	46	47	22	26	43
ENSMUSG00000026395	Ptprc	overlapping_locus	chr1	138062861	138175708	-	1606	1334	1816	2331	517	918	1717	1489	1279	1847	1384	1004	1182	1786	1905	2148	388	1127	1892
ENSMUSG00000104291	A130071D04Rik	overlapping_locus	chr1	138161820	138167683	-	30	36	26	10	77	6	33	13	4	34	55	29	23	22	23	19	16	10	22
ENSMUSG00000026393	Nek7	overlapping_locus	chr1	138482875	138620141	-	4615	4094	4750	5155	2043	2896	3124	2822	3225	2952	2256	2276	2306	3032	3683	3637	1254	2567	3120
ENSMUSG00000079283	2310009B15Rik		chr1	138851983	138856852	-	236	239	224	328	128	141	260	186	164	239	183	128	132	171	235	269	168	145	196
ENSMUSG00000056268	Dennd1b	overlapping_locus	chr1	138963435	139178960	+	1273	1184	1304	1346	619	746	971	1145	1259	1039	801	1027	836	918	1114	1055	272	655	911
ENSMUSG00000033964	Zbtb41		chr1	139422288	139453005	+	1060	1006	1352	1271	526	743	1046	1033	1082	927	929	875	703	834	1015	860	337	739	761
ENSMUSG00000033952	Aspm		chr1	139454772	139494091	+	387	362	536	581	246	306	1161	869	967	1092	969	869	581	412	370	324	262	412	246
ENSMUSG00000026365	Cfh		chr1	140084708	140183764	-	836	620	1098	902	268	476	714	612	763	849	581	451	695	634	840	902	165	708	930
ENSMUSG00000052726	Kcnt2	overlapping_locus	chr1	140246158	140612067	+	47	82	50	68	26	44	45	32	62	51	22	43	38	26	55	29	24	39	43
ENSMUSG00000101795	Gm5835	pseudo_consens	chr1	143093347	143094616	-	32	11	30	22	18	23	18	42	30	22	37	22	42	13	15	37	12	28	36
ENSMUSG00000026361	Cdc73		chr1	143598800	143702893	-	1779	1560	1864	1905	904	1143	1400	1658	1532	1493	1237	1229	1147	1400	1733	1368	556	1083	1405
ENSMUSG00000033849	B3galt2		chr1	143640664	143654614	+	408	444	578	539	272	350	200	128	165	158	107	147	170	293	235	426	99	277	478
ENSMUSG00000018196	Glrx2		chr1	143716338	143749676	+	1457	1543	1530	1569	841	1087	1262	1150	1259	1152	1030	1078	980	1043	1223	1230	650	879	1236
ENSMUSG00000018199	Ro60		chr1	143750790	143777068	-	1586	1549	1886	1917	797	1091	1574	1503	1412	1444	1006	1203	1035	1415	1670	1438	601	1031	1189
ENSMUSG00000018189	Uchl5	overlapping_locus	chr1	143777272	143807466	+	1287	1161	1105	1242	793	830	1373	1513	1337	1253	1378	1322	1049	956	1185	1137	569	783	864
ENSMUSG00000100455	Gm29170	overlapping_locus	chr1	143777642	143781307	+	70	72	95	86	73	52	57	87	61	68	61	71	78	65	59	68	42	67	46
ENSMUSG00000026360	Rgs2		chr1	143999338	144004161	-	719	723	799	905	403	422	705	518	684	639	563	435	497	613	739	679	326	480	790
ENSMUSG00000026358	Rgs1		chr1	144242296	144249242	-	60	49	79	98	26	43	93	104	142	100	84	59	68	63	118	103	15	49	87
ENSMUSG00000026357	Rgs18		chr1	144752683	144775435	-	253	237	292	307	76	129	185	114	213	203	115	92	141	225	224	256	50	125	324
ENSMUSG00000056220	Pla2g4a		chr1	149829618	149961290	-	1156	1388	1271	1072	473	968	788	896	935	766	741	654	710	875	901	1049	371	717	604
ENSMUSG00000032487	Ptgs2		chr1	150100031	150108227	+	81	76	37	29	32	34	55	69	141	57	108	115	54	40	41	77	27	94	23
ENSMUSG00000099875	Rbm3-ps		chr1	150265535	150265999	-	67	44	34	44	33	28	48	63	54	75	71	51	41	24	63	31	20	29	35
ENSMUSG00000006010	Odr4		chr1	150361305	150393080	-	1552	1368	1647	1713	771	1046	1191	1112	1132	1104	795	953	920	1122	1444	1141	485	891	1226
ENSMUSG00000006005	Tpr		chr1	150392838	150449935	+	4785	4462	4900	4923	2384	3373	5154	5029	5101	4947	4328	4150	3585	3670	4663	4782	1838	3566	3438
ENSMUSG00000006014	Prg4		chr1	150449412	150466165	-	1175	692	835	358	444	318	487	528	751	608	526	388	925	421	431	776	897	653	381
ENSMUSG00000066842	Hmcn1		chr1	150562524	150993435	-	1042	818	1118	1220	311	551	1235	1098	1226	968	800	782	867	676	1017	801	321	540	783
ENSMUSG00000100954	Gm10138		chr1	151339604	151345231	-	54	102	58	113	46	44	74	75	88	57	44	48	62	90	62	62	63	38	50
ENSMUSG00000023150	Ivns1abp		chr1	151344477	151364422	+	19017	17842	20341	20563	9085	11246	13129	12490	12888	12909	8463	9310	10072	15040	19152	16885	4185	9589	16868
ENSMUSG00000052748	Swt1		chr1	151367699	151428455	-	514	548	655	587	388	350	448	419	395	467	265	325	339	478	525	424	201	293	561
ENSMUSG00000053286	Trmt1l	ncRNA_host	chr1	151428542	151458161	+	925	717	749	928	588	484	708	664	537	625	457	450	525	704	1005	728	317	438	736
ENSMUSG00000103928	Gm37893		chr1	151445305	151447741	+	121	74	102	133	84	70	97	104	54	97	64	52	75	107	120	113	32	55	139
ENSMUSG00000026484	Rnf2		chr1	151458004	151500955	-	1277	1148	1321	1341	510	892	994	953	928	873	727	733	751	960	1086	1047	443	782	956
ENSMUSG00000026483	Fam129a		chr1	151571186	151721939	+	2678	2153	2658	2850	1274	1508	1740	1407	2062	1854	1445	1221	1406	1715	2012	2337	1309	1549	1794
ENSMUSG00000043019	Edem3		chr1	151755371	151822051	+	2442	2109	2449	2453	1056	1912	2107	2268	2088	1986	1645	1614	1491	2057	2461	2291	750	1850	1966
ENSMUSG00000032666	1700025G04Rik	ncRNA_host	chr1	151852403	152090125	-	3032	2830	3114	3217	1573	1890	2356	2214	2310	2295	1898	1796	1642	2040	2191	2300	1542	1699	1921
ENSMUSG00000014980	Tsen15		chr1	152370735	152386688	-	316	264	278	371	151	194	210	224	228	283	201	165	175	245	240	215	170	152	267
ENSMUSG00000032649	Colgalt2		chr1	152399830	152510695	+	398	261	317	364	185	134	143	104	172	171	77	62	137	195	192	224	107	118	204
ENSMUSG00000026482	Rgl1	overlapping_locus	chr1	152516760	152766351	-	1731	1291	1914	2114	648	1159	1233	1232	1579	1380	1035	908	1100	1217	1813	1637	793	1293	1535
ENSMUSG00000008475	Arpc5		chr1	152766542	152775597	+	6157	6364	6386	7056	3267	4272	7625	7547	7057	6994	6591	5619	5429	5256	6935	6277	3389	5119	5651
ENSMUSG00000026480	Ncf2		chr1	152800194	152836991	+	583	548	533	771	280	300	523	507	492	577	600	348	439	485	670	755	355	504	688
ENSMUSG00000042772	Smg7		chr1	152836995	152902646	-	2814	2389	2711	2926	1176	1697	2587	2712	2388	2238	1809	1983	1844	2232	2665	2622	1183	1765	1946
ENSMUSG00000042751	Nmnat2		chr1	152954993	153119261	+	53	48	61	61	47	72	54	25	42	23	28	45	23	36	58	42	39	45	24
ENSMUSG00000026479	Lamc2		chr1	153122756	153186447	-	2006	2589	2185	2425	1248	1892	2114	2017	1829	1752	1738	1589	1374	1557	1797	2356	1412	1616	1138
ENSMUSG00000026478	Lamc1		chr1	153218922	153332786	-	5559	4526	5672	5814	2218	3891	4422	4140	4370	3781	3246	2915	3220	3764	4382	4801	2831	3453	3241
ENSMUSG00000073538	E330020D12Rik		chr1	153404827	153414233	-	21	33	26	28	34	21	25	19	35	33	12	9	21	43	34	43	6	24	48
ENSMUSG00000042699	Dhx9		chr1	153455758	153487660	-	4839	4791	4836	4960	2125	3208	5147	5217	5218	4614	4358	4119	3384	3481	4435	4654	1708	3107	2936
ENSMUSG00000042684	Npl		chr1	153503015	153550045	-	3013	3774	3210	3477	1256	2400	2541	2289	2175	2073	1972	1758	2013	2859	3334	3244	1088	1961	2322
ENSMUSG00000042671	Rgs8		chr1	153653025	153700323	+	40	23	39	47	12	38	45	35	35	48	23	23	22	27	21	27	6	13	30
ENSMUSG00000026475	Rgs16		chr1	153740349	153745468	+	120	96	181	154	139	70	245	190	164	223	164	120	140	105	130	119	84	98	69
ENSMUSG00000066800	Rnasel		chr1	153749426	153764221	+	869	628	963	1021	304	474	1186	832	1044	950	818	685	720	628	1050	1088	235	668	1035
ENSMUSG00000045968	Teddm2		chr1	153849542	153900228	-	184	134	143	179	135	102	91	100	84	85	49	73	77	96	135	123	77	98	83
ENSMUSG00000026473	Glul		chr1	153899944	153909723	+	17058	12587	13302	14593	7165	7056	26287	24346	21179	23355	15684	14980	17819	11790	17280	14526	8753	11830	11742
ENSMUSG00000100502	Gm28286		chr1	154027363	154034301	-	60	38	60	49	18	34	29	47	22	18	13	34	17	73	60	40	19	29	83
ENSMUSG00000100627	A830008E24Rik	ncRNA_host	chr1	154037597	154117951	-	84	87	62	85	58	55	55	48	66	62	30	57	46	90	72	96	46	69	84
ENSMUSG00000066797	Zfp648		chr1	154201187	154205689	+	113	109	77	158	82	66	37	26	22	29	7	11	10	78	36	69	23	36	45
ENSMUSG00000004110	Cacna1e		chr1	154390731	154884501	-	1188	876	1324	1262	402	615	389	244	345	354	198	208	284	714	838	755	223	355	893
ENSMUSG00000096950	Gm9530		chr1	155063447	155083266	-	42	45	51	63	31	34	64	63	42	33	27	45	42	42	54	26	24	33	68
ENSMUSG00000056708	Ier5		chr1	155096361	155099636	-	1798	1618	1670	2144	620	1114	2895	3071	2513	2553	2314	2286	1881	1690	2310	1849	1047	1364	1323
ENSMUSG00000026471	Mr1		chr1	155127277	155146814	-	721	675	783	755	321	429	440	456	504	369	337	412	350	479	506	652	294	420	471
ENSMUSG00000026470	Stx6	overlapping_locus	chr1	155158715	155208256	+	2535	2692	2628	3024	1305	2020	3115	2995	3223	2877	2610	2530	2122	2050	2823	2567	1744	2060	1907
ENSMUSG00000033722	BC034090		chr1	155212471	155244444	-	256	313	295	383	205	192	275	182	206	205	109	169	139	270	252	252	136	147	256
ENSMUSG00000026469	Xpr1		chr1	155275701	155417415	-	1573	1350	1676	1739	709	1032	1544	1566	1453	1315	1227	1081	1048	1059	1497	1375	656	956	1135
ENSMUSG00000033701	Acbd6		chr1	155558120	155691330	+	2227	1929	1686	2520	1366	1740	1774	1554	1899	1589	1797	1515	1435	1760	1982	1929	2941	1639	1697
ENSMUSG00000033684	Qsox1		chr1	155776029	155812889	-	3620	3431	3401	4677	2087	2974	4750	4740	4715	4039	3892	3819	3265	3325	4558	3856	3494	3339	3418
ENSMUSG00000033671	Cep350		chr1	155844964	155973255	-	3133	2453	3500	3490	1104	2037	2874	2742	2732	2663	1982	2242	1870	2615	2753	2659	796	1918	2305
ENSMUSG00000026466	Tor1aip1		chr1	156004599	156036480	-	3367	2581	3194	2864	1632	1855	2162	2085	2244	1866	1693	1429	1625	2195	2576	2812	1690	2016	2254
ENSMUSG00000102964	9430034N14Rik		chr1	156026223	156030007	-	38	23	53	36	19	20	13	10	16	36	17	13	19	11	29	51	14	16	25
ENSMUSG00000050565	Tor1aip2		chr1	156035403	156068861	+	3452	3305	3518	3681	1833	2337	3595	3680	3448	3267	3019	2656	2550	2739	3435	3331	1841	2390	2611
ENSMUSG00000026601	Axdnd1		chr1	156323509	156421159	-	27	32	27	32	14	14	9	10	12	14	3	17	12	58	66	38	10	17	47
ENSMUSG00000078193	Gm2000		chr1	156366040	156366484	+	136	179	163	284	195	143	268	238	211	239	266	209	210	143	215	183	227	172	236
ENSMUSG00000026600	Soat1		chr1	156424525	156474331	-	8257	7516	7308	9038	4367	5912	5550	5256	5644	5191	4269	4606	4371	8109	11312	8503	9224	7289	7877
ENSMUSG00000101523	Csnk2a3		chr1	156524012	156526644	+	84	70	101	77	42	59	100	89	121	75	72	56	51	105	52	103	36	66	66
ENSMUSG00000026596	Abl2		chr1	156558786	156649568	+	2269	1927	2134	2465	1123	1446	1797	2005	2009	1653	1617	1462	1218	1423	1977	1859	1106	1519	1376
ENSMUSG00000104293	Gm38043		chr1	156583108	156588248	+	27	25	15	15	65	25	20	28	14	26	18	11	15	32	22	11	31	13	19
ENSMUSG00000060519	Tor3a		chr1	156653617	156674356	-	1222	1192	1355	1516	543	853	1084	1021	1043	1026	769	725	809	1179	1313	1235	791	879	1056
ENSMUSG00000033557	Fam20b		chr1	156678532	156719086	-	4975	4426	4838	5411	1846	3122	3848	3664	3700	3422	2708	2663	2654	3613	4290	4236	2106	2831	3130
ENSMUSG00000026594	Ralgps2	overlapping_locus	chr1	156804166	156939626	-	2267	2238	2331	2531	1003	1509	2209	2266	2325	2120	1682	1828	1512	1740	2209	1987	834	1347	1518
ENSMUSG00000033544	Angptl1		chr1	156838562	156861078	+	540	404	539	571	229	224	313	223	324	243	145	121	221	328	257	424	157	184	286
ENSMUSG00000070565	Rasal2	overlapping_locus	chr1	157135182	157412595	-	1760	1474	1810	1974	679	1386	1484	1480	1626	1246	1001	1147	984	1247	1673	1581	537	1021	1084
ENSMUSG00000049881	2810025M15Rik	pseudo_consens	chr1	157412352	157420236	+	742	754	707	855	534	507	585	510	529	621	511	513	472	581	633	630	664	492	580
ENSMUSG00000033488	Cryzl2		chr1	157458577	157492638	+	378	454	380	607	208	354	355	301	418	263	299	322	246	414	463	464	325	323	347
ENSMUSG00000026589	Sec16b		chr1	157506728	157568425	+	524	459	663	868	318	494	401	293	406	314	265	285	294	406	485	565	211	342	433
ENSMUSG00000073530	Pappa2	overlapping_locus	chr1	158711727	158980490	-	814	721	1128	970	180	481	409	377	393	464	30	317	307	640	656	532	40	593	688
ENSMUSG00000040782	Cop1	overlapping_locus	chr1	159232320	159347640	+	1511	1611	1644	1793	861	1134	1640	1313	1391	1366	1204	1194	1174	1246	1503	1413	587	1124	1238
ENSMUSG00000090394	4930523C07Rik		chr1	160044382	160080208	+	1206	909	1096	1027	729	597	665	705	618	561	533	520	603	587	813	860	689	706	692
ENSMUSG00000026725	Tnn		chr1	160085029	160153580	-	76	53	84	119	49	77	188	141	194	149	162	159	125	77	119	119	77	51	45
ENSMUSG00000058267	Mrps14		chr1	160195215	160202170	+	924	1127	847	1045	733	620	1084	942	1006	1000	985	747	736	639	814	898	686	683	755
ENSMUSG00000014226	Cacybp		chr1	160202367	160212875	-	1446	1596	1356	1509	906	1052	1677	1675	1547	1693	1472	1318	1208	1011	1523	1121	435	919	1064
ENSMUSG00000026721	Rabgap1l	overlapping_locus	chr1	160219174	160793211	-	2375	2125	2607	2504	882	1331	1957	1844	1871	1915	1349	1389	1361	1563	2104	2019	611	1182	1501
ENSMUSG00000040423	Rc3h1		chr1	160906418	160974978	+	2216	1667	2461	2481	988	1367	2308	2364	2045	2019	1457	1760	1398	2110	2209	1834	717	1503	1814
ENSMUSG00000043467	Zbtb37		chr1	161002922	161034849	-	996	748	1294	1337	384	675	601	479	744	619	419	413	377	690	983	878	179	429	843
ENSMUSG00000053332	Gas5	ncRNA_host	chr1	161034422	161038539	+	5719	5602	5462	6552	5464	3835	5708	5809	5387	5539	4784	4329	4404	4388	5743	5358	2439	3377	5279
ENSMUSG00000026709	Dars2		chr1	161040601	161070658	-	469	402	403	501	214	343	498	448	535	470	382	326	380	402	462	405	228	310	347
ENSMUSG00000026708	Cenpl		chr1	161070713	161086724	+	202	191	234	269	113	175	326	327	338	346	420	287	232	186	196	170	130	146	178
ENSMUSG00000026705	Klhl20		chr1	161088375	161131511	-	1193	1240	1305	1378	559	893	940	904	980	893	696	756	664	951	1104	920	434	690	818
ENSMUSG00000026701	Prdx6		chr1	161240112	161251219	-	6109	6290	6010	7035	3036	3844	4593	4224	4419	3946	3493	2948	3595	4322	4935	4998	3979	3211	4108
ENSMUSG00000066755	Tnfsf18		chr1	161494655	161505290	+	86	49	70	58	41	47	32	14	22	52	21	26	16	91	75	44	24	62	90
ENSMUSG00000040323	Gm15429		chr1	161726242	161727489	-	59	63	69	102	38	45	73	61	56	53	60	54	48	41	73	60	67	47	74
ENSMUSG00000040297	Suco		chr1	161816114	161876682	-	2079	1821	2063	2075	1062	1400	1664	1779	1955	1747	1355	1651	1209	1551	1846	1650	532	1393	1451
ENSMUSG00000026698	Pigc	overlapping_locus	chr1	161969186	161973435	+	815	725	809	934	456	520	800	689	598	629	601	564	567	617	715	843	486	547	638
ENSMUSG00000040265	Dnm3		chr1	161982453	162478034	-	343	226	438	329	132	183	237	168	267	167	102	149	169	237	294	258	131	179	226
ENSMUSG00000078190	Dnm3os	ncRNA_host	chr1	162217623	162225550	+	761	700	648	745	363	495	542	490	514	476	499	574	339	469	581	581	172	377	518
ENSMUSG00000026694	Eef1aknmt		chr1	162532127	162548551	-	1083	1052	815	1087	510	663	1012	1088	949	1040	782	646	715	973	1173	925	541	629	745
ENSMUSG00000026696	Vamp4		chr1	162570515	162599084	+	1648	1541	1791	1867	930	981	1472	1414	1264	1503	1204	1070	1129	1379	1578	1488	547	988	1544
ENSMUSG00000026697	Myoc		chr1	162639155	162649693	+	35441	30157	30195	37624	23169	25566	9553	10861	11075	9022	9128	7320	8030	19765	21374	23595	36373	23657	16597
ENSMUSG00000091060	Myocos		chr1	162647193	162658219	-	186	125	170	183	91	87	103	55	40	73	49	29	45	104	152	83	95	66	124
ENSMUSG00000040225	Prrc2c	ncRNA_host	chr1	162670725	162740556	-	7831	6397	7965	8687	3124	5078	6769	6838	6737	6045	4997	5080	4433	6064	6766	6937	2270	4031	5071
ENSMUSG00000040181	Fmo1		chr1	162829561	162866610	-	1698	1016	1155	1208	426	603	532	389	582	636	342	386	479	733	867	954	447	681	1026
ENSMUSG00000040170	Fmo2		chr1	162874317	162898726	-	2372	2308	2626	2331	580	1610	1251	1535	1509	1325	665	1081	1148	2235	2564	2200	452	1313	1920
ENSMUSG00000026586	Prrx1	overlapping_locus	chr1	163245119	163313710	-	5434	4286	5873	5894	3090	3453	3417	2999	3739	3443	2231	2162	2575	3664	3711	4002	2230	2917	3908
ENSMUSG00000040124	Gorab		chr1	163384908	163403669	-	443	420	541	472	214	363	388	404	344	344	267	214	255	326	446	398	165	295	343
ENSMUSG00000040113	Mettl11b		chr1	163702256	163725232	-	35	28	40	25	48	20	15	5	9	11	4	5	12	8	15	14	17	10	8
ENSMUSG00000026585	Kifap3		chr1	163779583	163917109	+	1091	957	1184	1156	705	787	943	945	961	862	781	738	680	769	794	964	506	697	714
ENSMUSG00000026584	Scyl3		chr1	163929100	163955126	+	1545	1613	1579	1874	646	1070	1422	1539	1383	1279	1152	1210	998	1140	1760	1436	554	993	1256
ENSMUSG00000041406	BC055324		chr1	163945993	163994796	-	163	188	168	219	103	138	276	269	226	246	249	197	145	135	239	162	89	108	145
ENSMUSG00000041396	Mettl18		chr1	163994889	163997243	+	106	137	118	113	79	82	128	79	102	108	96	87	87	95	122	92	54	72	95
ENSMUSG00000026582	Sele		chr1	164048234	164057677	+	81	89	125	117	58	68	135	112	145	105	105	99	117	81	103	109	59	74	93
ENSMUSG00000026580	Selp		chr1	164115264	164150026	+	190	151	204	259	80	99	240	228	302	266	234	218	309	139	223	224	123	155	142
ENSMUSG00000026579	F5	overlapping_locus	chr1	164151838	164220277	+	7	15	6	4	13	15	97	43	120	42	68	89	45	8	5	9	8	26	10
ENSMUSG00000040918	Slc19a2		chr1	164249046	164265385	+	1450	1451	1410	1494	540	954	1514	1642	1557	1376	1265	1466	1125	1105	1497	1311	455	1013	990
ENSMUSG00000026578	Ccdc181		chr1	164275585	164287847	+	427	385	480	504	351	392	355	326	351	404	291	335	321	446	415	429	241	322	379
ENSMUSG00000026577	Blzf1		chr1	164289800	164307489	-	1984	2003	2127	2120	961	1481	2117	2547	2043	2075	1635	2110	1574	1619	1998	2039	682	1381	1527
ENSMUSG00000026575	Nme7		chr1	164304121	164437725	+	250	250	252	384	215	212	388	342	367	398	386	342	244	214	275	203	198	253	196
ENSMUSG00000026576	Atp1b1		chr1	164437109	164458355	-	2719	1445	1839	1356	1539	1098	2252	2366	2453	1805	1440	1556	1872	1048	1273	1706	952	1178	786
ENSMUSG00000026574	Dpt		chr1	164796644	164824266	+	9824	8536	11108	12436	3818	4450	6062	5098	6442	5995	3537	3328	5055	5582	7312	7798	2957	4477	9461
ENSMUSG00000026573	Xcl1		chr1	164931644	164935527	-	74	61	60	164	43	59	10	8	1	15	4	1	9	60	67	27	23	28	82
ENSMUSG00000040848	Sft2d2		chr1	165174337	165194438	-	7149	6734	7328	7784	2505	4781	5922	5515	6031	5382	4438	4525	4155	5424	6502	6293	2922	4227	4901
ENSMUSG00000040843	Tiprl	overlapping_locus	chr1	165212286	165236996	-	1026	1058	1027	1061	605	713	858	715	820	834	769	636	680	825	973	840	600	731	886
ENSMUSG00000102302	Gm38190	overlapping_locus	chr1	165230371	165235125	-	84	65	120	176	30	80	106	83	70	103	46	45	32	104	128	115	24	56	132
ENSMUSG00000040836	Gpr161		chr1	165295789	165326745	+	824	882	964	934	399	614	745	629	658	586	544	440	496	546	708	659	391	477	465
ENSMUSG00000026571	Dcaf6	overlapping_locus	chr1	165328698	165460475	-	2310	2091	2789	2492	1409	1576	1357	1297	1418	1389	1028	1068	1181	1461	1859	1955	1035	1378	1776
ENSMUSG00000026568	Mpc2	overlapping_locus	chr1	165460637	165481214	+	2434	2884	2112	2555	1708	1767	1639	1481	1660	1537	1386	1191	1359	1664	2074	1919	1595	1534	1939
ENSMUSG00000026566	Mpzl1	overlapping_locus	chr1	165592240	165634538	-	1346	1393	1539	1623	773	1024	974	746	987	888	691	716	635	1065	1002	1077	871	777	910
ENSMUSG00000040723	Rcsd1		chr1	165646516	165709757	-	1168	948	1034	1164	831	650	535	482	641	676	487	392	616	750	819	1027	714	692	911
ENSMUSG00000040713	Creg1		chr1	165763746	165775308	+	2981	2556	2674	3273	963	1923	2271	2157	2608	2132	1685	1678	1743	2146	3002	2679	1403	2223	2651
ENSMUSG00000005763	Cd247	overlapping_locus	chr1	165788681	165877277	+	318	260	348	472	180	213	148	146	103	125	150	114	134	180	252	239	177	164	341
ENSMUSG00000026565	Pou2f1		chr1	165865154	166002678	-	1202	1179	1379	1430	680	848	1050	893	1050	1120	827	840	619	858	1134	1029	526	695	794
ENSMUSG00000026564	Dusp27		chr1	166098148	166127922	-	352	314	320	174	401	219	116	143	138	126	111	113	152	176	163	293	285	206	101
ENSMUSG00000040612	Ildr2		chr1	166254139	166316823	+	218	223	242	294	113	168	125	199	137	154	112	107	128	173	151	162	114	196	182
ENSMUSG00000026563	Tada1		chr1	166379097	166393621	+	564	493	494	554	214	309	489	452	464	447	360	375	316	402	520	420	199	320	405
ENSMUSG00000040596	Pogk		chr1	166384622	166409863	-	2190	1879	2606	2303	690	1460	1476	1485	1518	1365	959	1141	1075	1609	2067	1717	790	1215	1665
ENSMUSG00000060568	Fam78b		chr1	167001417	167091302	+	154	180	250	197	64	144	144	146	128	152	136	123	83	132	172	117	104	118	120
ENSMUSG00000026558	Uck2		chr1	167222883	167285320	-	2774	3031	2416	2884	1284	1772	3833	3765	3901	3465	3644	3259	2620	2033	2846	2839	1619	1720	1578
ENSMUSG00000052428	Tmco1		chr1	167308378	167333978	+	1290	1337	1191	1417	784	912	1291	1136	1246	1276	1120	1024	1081	1047	1159	1157	744	970	1108
ENSMUSG00000026687	Aldh9a1		chr1	167349991	167368532	+	2126	1941	1888	2647	1021	1575	1875	2008	2195	2038	1726	1553	1517	1680	2142	2064	1858	1741	1685
ENSMUSG00000026688	Mgst3		chr1	167371966	167393841	-	1760	1774	1434	1678	1647	994	1447	1368	1646	1312	1213	1226	1148	921	1334	1482	1488	1135	974
ENSMUSG00000015843	Rxrg		chr1	167598384	167639623	+	144	136	122	118	145	94	72	37	61	64	58	54	63	73	86	103	90	76	80
ENSMUSG00000026686	Lmx1a		chr1	167689237	167848741	+	8	43	47	38	20	26	26	12	30	12	4	7	12	9	35	16	18	19	19
ENSMUSG00000052534	Pbx1	overlapping_locus	chr1	168119364	168432270	-	4066	3554	4444	4863	2411	2723	3593	3388	3837	3778	2901	2416	2497	2848	3374	3835	2308	2480	2774
ENSMUSG00000026683	Nuf2		chr1	169497934	169531464	-	159	154	178	239	130	130	471	362	378	502	582	338	274	166	134	205	136	200	121
ENSMUSG00000026678	Rgs5		chr1	169655501	169695813	+	3704	3365	4077	3475	2280	2392	2366	1903	2314	2137	1961	2130	1910	2260	2382	3078	1363	2562	2326
ENSMUSG00000038530	Rgs4		chr1	169741477	169747642	-	211	181	225	134	169	100	572	573	238	496	308	167	249	126	206	148	115	174	145
ENSMUSG00000026675	Hsd17b7		chr1	169949535	169969241	-	4219	3942	3882	5375	3958	6803	4244	5342	5015	3731	4777	5218	2980	3871	6026	4501	6419	6172	3663
ENSMUSG00000097503	3110045C21Rik		chr1	169969409	169972396	+	19	30	29	43	13	22	21	17	13	21	26	25	30	32	16	34	13	26	32
ENSMUSG00000026674	Ddr2		chr1	169972307	170110762	-	3633	3265	4339	4213	2165	2270	3204	2903	3335	2897	2194	2694	2313	2621	3458	3642	1181	2210	2935
ENSMUSG00000026670	Uap1		chr1	170141938	170174957	-	1746	1377	1559	1705	1003	1118	1233	1308	1211	1076	999	868	1010	1163	1413	1361	742	1192	1248
ENSMUSG00000026667	Uhmk1		chr1	170193420	170215397	-	3179	2837	3461	3632	1409	2147	2976	2935	2883	2668	2344	2321	2037	2669	2970	2776	1209	2039	2380
ENSMUSG00000102418	Sh2d1b1		chr1	170277320	170286769	+	12	39	24	34	9	14	45	64	39	55	57	49	46	27	35	26	19	34	62
ENSMUSG00000102752	Gm7694	overlapping_locus	chr1	170298199	170306332	-	516	567	542	640	230	371	311	285	298	324	276	247	225	320	398	369	262	256	391
ENSMUSG00000038473	Nos1ap	overlapping_locus	chr1	170302668	170589861	-	153	145	189	203	99	129	126	78	130	114	89	81	63	103	124	143	75	99	133
ENSMUSG00000042800	Spata46		chr1	170308803	170312125	+	36	24	51	38	17	18	15	23	14	23	9	15	16	26	26	30	7	10	25
ENSMUSG00000038463	Olfml2b		chr1	170644532	170682789	+	1408	1452	1368	1919	596	961	1112	839	1141	1066	840	818	738	960	987	1048	691	813	735
ENSMUSG00000026663	Atf6	ncRNA_host	chr1	170704674	170867771	-	2139	1777	2069	2237	846	1377	2033	2194	2075	1887	1613	1511	1418	1698	2018	1964	949	1395	1507
ENSMUSG00000053925	Gm9929		chr1	170868645	170881721	+	111	47	114	143	77	53	82	100	60	64	37	52	47	63	100	75	35	50	107
ENSMUSG00000026659	Dusp12		chr1	170873498	170885540	-	416	382	362	504	285	298	294	294	310	305	228	211	224	354	393	309	184	245	355
ENSMUSG00000026656	Fcgr2b		chr1	170958617	170976547	-	1976	1562	2302	2847	596	1221	1565	1449	1363	1786	1901	1263	907	1403	1768	2254	882	1674	1664
ENSMUSG00000059089	Fcgr4	ncRNA_host	chr1	171018920	171029761	+	6	13	11	5	8	5	163	180	88	126	86	53	140	59	118	198	15	37	107
ENSMUSG00000059498	Fcgr3	ncRNA_host	chr1	171051174	171064935	-	876	1065	1120	1420	353	830	800	714	861	892	831	587	636	835	1178	1193	650	1182	1603
ENSMUSG00000058076	Sdhc		chr1	171127165	171150603	-	3821	3640	3006	3751	2773	2300	3409	2744	3373	3003	2754	2249	2513	2424	3024	3355	3034	2421	2566
ENSMUSG00000056569	Mpz		chr1	171150711	171161130	+	7777	8190	8180	9141	6804	6125	3478	2911	3197	3101	3204	2079	2621	4807	4974	6004	10192	4487	3541
ENSMUSG00000038370	Pcp4l1		chr1	171173262	171196268	-	2220	1307	1580	1485	1903	838	745	734	822	826	507	372	699	862	836	1349	1273	857	855
ENSMUSG00000005674	Tomm40l		chr1	171216011	171222514	-	356	359	382	503	241	225	386	347	369	391	304	232	285	347	362	377	257	215	341
ENSMUSG00000058715	Fcer1g		chr1	171229572	171234365	-	694	809	851	946	366	478	1290	984	897	1129	998	587	959	768	1115	1233	761	859	1270
ENSMUSG00000013593	Ndufs2		chr1	171234853	171251388	-	5802	5846	5303	5793	4880	3896	5317	4757	5202	4974	4803	4093	4156	3958	4728	4875	4966	4023	4091
ENSMUSG00000006403	Adamts4		chr1	171250421	171260637	+	28	25	21	61	39	78	92	89	63	82	128	134	39	18	45	44	32	44	12
ENSMUSG00000052423	B4galt3		chr1	171270328	171276896	+	884	825	941	1007	495	532	679	631	674	636	425	517	432	700	908	742	369	472	751
ENSMUSG00000062729	Ppox		chr1	171275990	171281186	-	1580	1519	1577	1686	935	992	1160	999	997	1037	830	755	840	1225	1540	1410	632	760	1437
ENSMUSG00000053483	Usp21		chr1	171281945	171287991	-	1139	1102	1102	1396	693	719	922	829	747	817	643	622	651	923	1072	889	502	643	932
ENSMUSG00000062963	Ufc1		chr1	171288563	171295024	-	1985	2202	1834	2396	1420	1426	1845	1686	1823	1677	1597	1435	1412	1411	1869	1899	1637	1401	1479
ENSMUSG00000103983	Gm20045		chr1	171320601	171326177	-	127	112	167	150	151	111	188	106	90	108	104	99	107	142	136	150	54	99	203
ENSMUSG00000013973	Dedd		chr1	171329145	171342331	+	459	363	379	447	247	286	350	370	359	341	296	313	282	368	401	345	231	270	385
ENSMUSG00000013997	Nit1		chr1	171338008	171345646	-	972	964	931	1178	478	703	975	953	834	875	788	760	763	807	983	952	550	645	846
ENSMUSG00000006412	Pfdn2		chr1	171345670	171359254	+	1605	1576	1362	1665	1386	914	1440	1613	1524	1376	1310	1197	1149	1105	1445	1493	1013	1013	1124
ENSMUSG00000045259	Klhdc9		chr1	171358446	171360798	-	32	27	28	53	21	29	17	28	23	18	21	6	19	15	19	22	22	24	18
ENSMUSG00000006411	Nectin4		chr1	171370099	171388598	+	8021	8577	7097	8157	2916	5281	7401	7968	7594	6266	5433	6050	5346	5887	6758	6742	2885	4236	4568
ENSMUSG00000048865	Arhgap30		chr1	171388954	171410298	+	973	974	1289	1346	433	629	1208	1033	1051	1092	989	849	895	1015	1466	1427	494	859	1312
ENSMUSG00000026641	Usf1	overlapping_locus	chr1	171411313	171419142	+	1374	1344	1341	1683	989	952	1499	1354	1178	1284	1246	1054	1095	1105	1408	1304	1090	973	1259
ENSMUSG00000103711	Tstd1	overlapping_locus	chr1	171418872	171420352	+	45	36	43	48	44	31	54	45	40	37	41	35	38	55	29	42	19	32	51
ENSMUSG00000038235	F11r		chr1	171437535	171464603	+	2314	2363	2510	2650	1345	1690	3058	2967	2805	2622	2534	2330	2174	2187	2162	2277	1474	1696	2054
ENSMUSG00000060244	Alyref2		chr1	171503478	171504750	+	79	91	85	173	80	100	98	51	72	77	68	61	66	81	93	107	55	56	86
ENSMUSG00000004709	Cd244a		chr1	171559193	171609746	+	246	259	355	424	124	134	151	153	104	185	157	91	96	197	253	233	105	155	253
ENSMUSG00000004707	Ly9		chr1	171588624	171607410	-	130	128	157	120	28	55	119	117	170	150	115	76	124	147	164	232	51	118	223
ENSMUSG00000038179	Slamf7	ncRNA_host	chr1	171632403	171653035	-	330	253	365	364	71	150	204	195	158	203	166	95	155	251	342	304	94	186	365
ENSMUSG00000015355	Cd48		chr1	171682009	171705258	+	239	212	366	378	109	164	264	245	290	388	216	182	233	281	322	271	123	266	423
ENSMUSG00000038147	Cd84		chr1	171839697	171890718	+	435	345	531	637	152	225	351	361	436	435	358	234	289	367	525	661	118	392	476
ENSMUSG00000073492	Gm10521		chr1	171895664	171898237	+	22	15	41	34	12	12	32	13	17	23	14	12	16	21	48	50	5	21	37
ENSMUSG00000026556	Vangl2		chr1	172000960	172028444	-	1893	2027	2118	2219	1321	1405	2140	2146	2028	1884	1602	1655	1490	1629	1813	1484	994	1130	1286
ENSMUSG00000051251	Nhlh1		chr1	172052292	172057573	-	49	59	53	58	27	70	24	37	21	26	21	12	34	40	54	26	38	50	27
ENSMUSG00000003458	Ncstn		chr1	172066013	172082795	-	4488	4914	4927	5263	1890	3283	4669	4152	4529	3645	3336	3216	3151	3489	4105	4447	2420	3026	3031
ENSMUSG00000026553	Copa		chr1	172082529	172122330	+	9801	9428	10117	11071	4744	7097	9423	9142	9336	8376	6945	7042	6735	7481	8926	9222	5081	6665	6309
ENSMUSG00000003464	Pex19		chr1	172126755	172136493	+	3559	3809	3930	4262	2166	2962	2701	2515	2785	2470	2364	2190	2103	3060	3806	3527	3396	3050	3119
ENSMUSG00000026554	Dcaf8		chr1	172148084	172197005	+	6076	5747	6006	7017	3636	4135	4862	4395	4876	4925	3631	3537	3669	4530	5283	5393	3600	3590	4555
ENSMUSG00000013698	Pea15a		chr1	172196728	172206804	-	4943	4711	5109	6165	2400	3492	3468	3081	3138	3269	2207	2214	2428	4012	4520	4539	3333	3340	4389
ENSMUSG00000007122	Casq1		chr1	172209894	172219868	-	3403	2677	2990	1855	5689	2275	1041	1262	1080	1296	733	641	1500	1350	1654	2146	2244	1945	1193
ENSMUSG00000038034	Igsf8		chr1	172261641	172319841	+	2301	2483	2073	2764	1392	1521	2746	2737	2388	2672	2125	1793	1822	1863	2308	2163	1561	1530	1750
ENSMUSG00000007097	Atp1a2		chr1	172271709	172298064	-	14310	10803	12191	8423	14544	7613	4484	4678	5473	4832	3331	3383	5209	6726	6759	9777	9386	6957	6307
ENSMUSG00000050229	Pigm		chr1	172376546	172384099	+	1376	1456	1629	1758	572	869	1418	1551	1565	1444	1207	1236	1017	1106	1363	1414	599	912	1187
ENSMUSG00000026548	Slamf9		chr1	172475358	172478575	+	116	119	154	204	93	89	573	664	390	404	422	191	429	322	461	490	244	183	438
ENSMUSG00000037995	Igsf9		chr1	172481788	172498878	+	1288	1338	1582	1619	626	989	1633	1595	1567	1449	1100	1146	1135	1243	1571	1093	583	797	1205
ENSMUSG00000026547	Tagln2		chr1	172500047	172507380	+	4817	3918	4214	4501	2479	2719	8415	9688	8170	7798	8433	5862	5656	3191	5425	4399	4304	3924	2978
ENSMUSG00000026546	Cfap45		chr1	172520801	172545870	+	43	30	53	69	29	36	112	77	105	75	84	83	72	57	47	62	51	55	41
ENSMUSG00000085184	4933439K11Rik		chr1	172538133	172558129	-	27	24	42	37	11	21	96	87	70	68	61	71	67	35	35	26	11	25	28
ENSMUSG00000049598	Vsig8		chr1	172555938	172563717	+	4	9	30	16	172	38	5411	4261	5210	4175	2876	4414	2607	45	214	27	182	41	84
ENSMUSG00000053318	Slamf8		chr1	172581758	172590568	-	27	38	48	36	10	18	33	56	10	58	22	20	25	39	33	62	18	28	39
ENSMUSG00000026544	Dusp23		chr1	172630764	172632962	-	245	230	242	325	280	170	218	184	181	209	128	125	158	194	182	199	293	171	210
ENSMUSG00000005339	Fcer1a		chr1	173221284	173227214	-	92	30	49	109	15	41	136	134	201	188	68	97	123	36	113	142	18	70	75
ENSMUSG00000037872	Ackr1	overlapping_locus	chr1	173331886	173333750	-	542	585	687	684	423	453	441	460	427	436	422	406	359	379	644	475	603	517	570
ENSMUSG00000005338	Cadm3	overlapping_locus	chr1	173333258	173367695	-	3156	2610	3502	3885	1309	2160	2021	2088	1966	1791	1527	1390	1599	1932	2890	2622	1791	2182	2556
ENSMUSG00000037860	Aim2		chr1	173350879	173466040	+	207	207	257	269	95	139	489	394	296	441	396	432	315	200	238	267	96	207	262
ENSMUSG00000073491	Ifi213		chr1	173566283	173599274	-	17	21	16	34	7	6	83	63	65	58	66	22	48	50	35	103	7	13	76
ENSMUSG00000043263	Ifi209		chr1	173630917	173647928	+	34	55	76	71	8	29	97	121	78	140	127	36	95	83	88	189	13	49	111
ENSMUSG00000066677	Ifi208		chr1	173673675	173698395	+	14	9	10	21	7	5	18	17	25	41	35	11	22	20	53	60	6	14	29
ENSMUSG00000073490	Ifi207		chr1	173723427	173741747	-	460	349	466	447	165	275	469	460	477	551	440	316	398	405	721	587	157	447	633
ENSMUSG00000073489	Ifi204		chr1	173747293	173766943	-	237	190	300	220	140	112	397	470	519	473	464	265	404	241	467	573	92	289	452
ENSMUSG00000090222	Ifi203-ps		chr1	173776529	173798270	-	92	47	70	77	48	38	91	67	58	52	43	47	33	70	88	96	12	40	73
ENSMUSG00000090272	Mndal		chr1	173849126	173880881	-	244	232	351	316	126	105	400	326	395	355	217	173	274	333	383	427	69	175	453
ENSMUSG00000026536	Ifi211		chr1	173896345	173913046	-	61	42	53	75	44	40	98	72	67	104	99	58	59	50	85	97	23	62	91
ENSMUSG00000039997	Ifi203		chr1	173920407	173942672	-	393	351	495	461	204	197	534	453	400	592	374	279	354	519	559	606	145	301	715
ENSMUSG00000026535	Ifi202b		chr1	173962568	173982744	-	326	381	391	415	152	243	265	276	276	194	146	200	242	302	433	406	87	153	294
ENSMUSG00000054203	Ifi205		chr1	174011998	174031810	-	160	56	135	89	36	58	41	77	88	95	92	85	95	48	55	107	12	144	82
ENSMUSG00000028354	Fmn2		chr1	174501825	174822729	+	63	24	48	64	11	32	25	29	35	31	17	20	13	26	40	34	20	26	27
ENSMUSG00000050069	Grem2		chr1	174833785	174921819	-	78	106	140	93	64	91	132	112	101	145	127	99	115	67	85	81	51	84	76
ENSMUSG00000026526	Fh1		chr1	175600374	175625635	-	2064	2210	2090	2137	1312	1541	2186	2087	2112	1987	1837	1591	1631	1585	1801	2019	1362	1484	1608
ENSMUSG00000039783	Kmo		chr1	175620381	175662116	+	118	104	119	144	31	61	49	37	39	84	70	39	27	50	100	100	44	67	107
ENSMUSG00000026525	Opn3	overlapping_locus	chr1	175662421	175692776	-	57	19	63	48	31	26	28	29	29	13	24	29	27	42	35	44	13	29	33
ENSMUSG00000078185	Chml	overlapping_locus	chr1	175682237	175692901	-	724	668	850	747	269	443	546	496	490	494	373	434	319	592	691	559	121	403	568
ENSMUSG00000039748	Exo1	ncRNA_host	chr1	175880581	175913489	+	160	121	110	195	71	106	251	227	233	291	255	177	134	84	134	95	89	77	72
ENSMUSG00000057335	Cep170	ncRNA_host	chr1	176733653	176814067	-	1000	716	1066	1116	398	514	657	710	705	714	520	463	534	854	837	997	248	612	828
ENSMUSG00000026504	Sdccag8	overlapping_locus	chr1	176814660	177020437	+	447	403	506	534	332	318	390	299	330	322	298	260	277	347	348	420	239	328	442
ENSMUSG00000103367	Gm38158	overlapping_locus	chr1	176835724	176836062	+	68	51	53	82	42	47	43	55	43	45	48	25	30	42	91	92	28	65	82
ENSMUSG00000019699	Akt3		chr1	177020073	177258203	-	755	553	953	852	333	449	562	597	553	573	333	311	456	541	599	646	335	486	718
ENSMUSG00000063659	Zbtb18		chr1	177442351	177450764	+	1226	1224	1348	1297	756	866	1187	1156	1013	1066	840	872	711	1008	1192	1007	383	798	930
ENSMUSG00000015961	Adss		chr1	177762962	177796511	-	2959	2887	2785	3190	1387	1767	2469	2293	2550	2202	2030	1676	1791	2013	2430	2362	1146	1609	1892
ENSMUSG00000026502	Desi2		chr1	178187417	178257301	+	1250	1159	1459	1334	561	875	1362	1586	1456	1335	1233	1229	1001	1082	1399	1131	527	960	1001
ENSMUSG00000086350	B230369F24Rik		chr1	178313328	178318549	-	27	39	52	46	26	16	42	25	17	39	14	11	18	35	49	44	18	20	36
ENSMUSG00000026500	Cox20		chr1	178319130	178322693	+	62	78	50	92	62	42	56	47	38	47	61	34	38	64	64	61	34	30	61
ENSMUSG00000039630	Hnrnpu	overlapping_locus	chr1	178321108	178337797	-	16991	14575	17111	17877	8663	11232	17117	17256	16953	16653	14083	13240	12378	13487	16264	15202	6198	11110	13372
ENSMUSG00000104279	Gm38300		chr1	178339601	178341470	+	59	41	33	41	39	20	38	50	54	24	28	21	19	33	37	35	37	23	34
ENSMUSG00000026495	Efcab2		chr1	178406085	178484513	+	276	292	316	298	330	161	113	154	132	147	90	83	138	152	205	251	115	154	178
ENSMUSG00000026494	Kif26b	ncRNA_host	chr1	178529125	178939200	+	300	227	268	362	111	172	1090	836	973	773	760	667	592	265	385	321	196	207	185
ENSMUSG00000055067	Smyd3		chr1	178951960	179518041	-	674	656	580	765	286	454	581	403	501	516	407	421	340	370	455	569	376	414	415
ENSMUSG00000026492	Tfb2m		chr1	179528055	179546267	-	404	351	412	421	164	251	405	345	380	338	225	248	225	227	381	336	117	226	287
ENSMUSG00000038949	Cnst		chr1	179546370	179627478	+	3272	2966	3388	3640	1513	2289	2186	2263	2328	2138	1545	1939	1788	2677	3060	2872	1309	1745	2355
ENSMUSG00000038936	Sccpdh		chr1	179668210	179687189	+	1521	1765	1417	1780	1166	1532	533	443	560	465	547	532	470	712	687	990	1165	946	766
ENSMUSG00000026491	Ahctf1	overlapping_locus	chr1	179744894	179803680	-	3010	2768	3085	2920	1249	1862	2679	2518	2766	2616	2037	2154	1895	2122	2706	2531	922	1765	2035
ENSMUSG00000026490	Cdc42bpa		chr1	179960472	180165603	+	3444	2874	3491	3661	1407	2247	2337	2255	2527	2188	1578	1705	1549	2244	2669	2798	1282	1971	2039
ENSMUSG00000026489	Coq8a		chr1	180165238	180199602	-	6240	4741	4748	4209	5295	2879	2079	2093	3002	2319	1584	1546	2322	3005	3077	4492	3831	2831	2226
ENSMUSG00000010609	Psen2		chr1	180227004	180263438	-	723	610	707	856	474	433	562	417	543	492	466	410	382	440	674	618	562	498	568
ENSMUSG00000055676	Gm5069	pseudo_consens	chr1	180326970	180330550	-	71	26	46	38	16	22	32	52	32	17	24	17	39	27	38	41	25	20	29
ENSMUSG00000038855	Itpkb		chr1	180330485	180424802	+	8416	7448	8233	8016	2607	4723	4550	5137	4475	3852	3149	3399	3422	5009	5421	5952	2843	3756	4181
ENSMUSG00000104388	Gm37033		chr1	180357649	180364998	+	10	22	4	16	99	14	21	4	11	4	15	7	6	12	17	9	46	12	19
ENSMUSG00000053963	Stum		chr1	180432387	180483504	-	69	57	96	38	55	35	35	25	37	32	38	31	34	38	52	57	35	25	30
ENSMUSG00000026496	Parp1	ncRNA_host	chr1	180568924	180601254	+	1656	1502	1465	1888	795	1062	1729	1545	1543	1555	1324	1004	1086	1280	1486	1419	782	900	1079
ENSMUSG00000058729	Lin9		chr1	180641150	180690694	+	245	250	281	259	127	162	351	328	361	345	308	328	277	244	297	240	102	203	212
ENSMUSG00000026499	Acbd3		chr1	180726043	180754204	+	2444	2265	2247	2724	1414	1586	2302	2401	2219	2037	1611	1754	1638	2093	2253	2221	936	1447	1825
ENSMUSG00000103649	Gm37768		chr1	180743210	180755836	-	63	77	100	69	47	58	66	55	77	70	58	45	50	72	79	78	53	44	64
ENSMUSG00000060743	H3f3a		chr1	180800832	180813943	-	3550	3662	3289	4057	1966	2307	4109	3648	3729	3692	3161	3059	2940	2961	3711	3508	1929	2368	2962
ENSMUSG00000073485	H3f3aos		chr1	180813776	180816859	+	65	60	60	91	41	56	55	40	42	55	26	30	34	80	51	82	27	21	65
ENSMUSG00000038806	Sde2		chr1	180851127	180868113	+	1363	1326	1428	1445	696	977	1657	1655	1442	1438	1186	1331	973	1105	1437	1185	659	950	1024
ENSMUSG00000026520	Pycr2		chr1	180904293	180908088	+	1067	1109	767	1263	704	704	1164	1006	982	950	818	794	739	724	1003	952	762	697	745
ENSMUSG00000038793	Lefty1		chr1	180935022	180938400	+	368	461	372	538	225	287	296	234	299	311	216	236	197	282	406	321	242	195	292
ENSMUSG00000026519	Tmem63a		chr1	180942344	180975112	+	5587	5964	5900	6535	3021	4564	4198	3957	4373	3689	3218	3438	3244	4580	5158	5036	4047	3578	4147
ENSMUSG00000085563	2210411M09Rik		chr1	180952064	180958149	-	53	67	117	114	34	53	36	36	35	43	22	27	28	52	42	51	19	37	54
ENSMUSG00000038776	Ephx1	overlapping_locus	chr1	180976210	181020904	-	4375	3399	3950	5051	1887	2089	2354	1907	2522	2324	1376	1317	1968	2790	3011	3176	2290	2162	3133
ENSMUSG00000026516	Nvl		chr1	181087138	181144204	-	1777	1548	1927	2019	952	1189	1860	1897	1716	1705	1417	1389	1214	1392	1948	1635	717	1135	1455
ENSMUSG00000062169	Cnih4		chr1	181144693	181168994	+	1203	1363	1172	1385	890	889	1338	1518	1295	1356	1271	1041	1090	973	1276	1110	833	974	1155
ENSMUSG00000038733	Wdr26		chr1	181173228	181212001	-	12147	11122	12912	12785	5299	8182	12319	12527	12986	11397	9378	11296	9208	9289	12326	10934	3875	7761	8791
ENSMUSG00000054135	A430110L20Rik		chr1	181225986	181228498	+	87	64	96	108	72	82	69	85	61	64	37	39	59	74	133	83	27	51	111
ENSMUSG00000047369	Dnah14		chr1	181576559	181815774	+	60	66	77	77	36	48	60	32	42	50	31	32	28	42	62	70	29	39	53
ENSMUSG00000004880	Lbr	ncRNA_host	chr1	181815335	181843046	-	2037	2038	2038	2351	1060	1667	2579	2466	2477	2220	2062	2177	1622	1691	2175	1794	1030	1660	1451
ENSMUSG00000022995	Enah		chr1	181896384	182019990	-	2076	1797	1995	1898	1431	1507	3716	3824	4276	3464	3701	3259	2418	1563	2175	2086	1094	1488	1285
ENSMUSG00000026511	Srp9		chr1	182124737	182132407	+	1574	1789	1513	1849	1162	1080	1765	1655	1567	1592	1598	1373	1192	1212	1593	1594	929	981	1310
ENSMUSG00000038633	Degs1		chr1	182275772	182282804	-	4743	4575	4472	5052	2170	3124	7412	8745	7347	6326	6715	6460	5456	4058	5737	4635	3670	4439	3363
ENSMUSG00000100147	1700047M11Rik		chr1	182287990	182303325	+	94	63	84	94	54	63	62	45	57	42	28	33	29	40	72	41	33	27	55
ENSMUSG00000047539	Fbxo28		chr1	182313102	182341629	-	2027	1870	2015	2210	931	1416	2042	2236	2074	1746	1652	1759	1400	1657	2023	1847	962	1326	1395
ENSMUSG00000026510	Trp53bp2		chr1	182409172	182462432	+	3383	3537	3246	3784	1365	2388	2272	2146	2306	1999	1568	1858	1706	2630	2900	2715	1125	1790	2210
ENSMUSG00000026509	Capn2		chr1	182467260	182517608	-	4419	3555	4135	4448	2350	2759	5866	6585	5784	5558	6109	4360	4431	3121	4894	3889	2786	3570	3347
ENSMUSG00000038599	Capn8		chr1	182565007	182632352	+	2	12	6	9	5	12	457	294	378	412	258	326	219	11	29	8	2	3	6
ENSMUSG00000038576	Susd4		chr1	182763860	182896591	+	131	165	182	258	131	161	122	119	176	129	106	121	100	150	174	179	121	146	180
ENSMUSG00000079164	Tlr5		chr1	182954788	182976044	+	441	389	529	600	172	465	353	223	357	319	210	268	240	458	457	509	247	386	509
ENSMUSG00000030768	Disp1	overlapping_locus	chr1	183086266	183221522	-	1399	1212	1336	1750	552	866	678	632	676	719	461	421	575	908	1004	1079	660	648	960
ENSMUSG00000046836	Brox		chr1	183276352	183297269	-	1986	1917	1870	2201	954	1295	1890	1778	1849	1754	1460	1434	1287	1448	1943	1613	821	1274	1470
ENSMUSG00000042901	Aida		chr1	183296590	183325476	+	1614	1512	1768	1754	885	984	1399	1368	1396	1364	1116	947	1045	1120	1525	1227	646	1047	1282
ENSMUSG00000056050	Mia3	fragmented_locus	chr1	183326725	183369553	-	4430	4079	4557	4708	1946	2972	3618	3654	3921	3340	2624	2759	2636	3217	3948	3903	1680	2732	2905
ENSMUSG00000072258	Taf1a	fragmented_locus	chr1	183388981	183410198	+	835	781	779	850	417	569	699	567	508	494	405	489	494	571	847	696	262	470	731
ENSMUSG00000039384	Dusp10		chr1	184013302	184075636	+	205	219	213	202	206	168	149	186	230	137	109	154	135	118	123	173	113	149	96
ENSMUSG00000039377	Hlx		chr1	184727140	184732619	-	375	318	330	411	157	196	287	177	223	227	206	136	176	223	328	358	264	218	308
ENSMUSG00000073481	Mtarc2	ncRNA_host	chr1	184813068	184846451	-	2898	3344	2814	3401	1954	2275	2540	2124	2378	1921	2194	1804	1935	1942	2747	2515	2625	2114	2250
ENSMUSG00000039349	C130074G19Rik		chr1	184871926	184883218	-	1694	1573	1790	2302	1412	1225	1158	981	1031	1077	679	810	955	1289	1515	1478	1637	1308	1780
ENSMUSG00000026620	Mark1		chr1	184896789	184999570	-	650	666	666	714	304	471	941	983	959	869	643	757	692	530	820	585	341	492	464
ENSMUSG00000039318	Rab3gap2	ncRNA_host	chr1	185204117	185286759	+	2417	2358	2617	2610	933	1679	2608	2644	2466	2284	1754	1996	1823	2069	2477	2352	909	1530	1814
ENSMUSG00000026618	Iars2		chr1	185284726	185329396	-	4008	4074	4031	4191	1950	3010	3895	3711	3757	3181	2932	3007	2601	3131	3749	3584	1831	2596	2512
ENSMUSG00000026617	Bpnt1		chr1	185332149	185357777	+	818	811	717	895	434	567	779	738	661	599	617	638	504	548	622	623	474	552	512
ENSMUSG00000026615	Eprs		chr1	185363044	185428360	+	4669	4657	4157	4304	3400	3000	5559	6361	5509	5089	4993	4502	4054	3312	4215	4275	2605	2940	2686
ENSMUSG00000039246	Lyplal1		chr1	186087731	186117310	-	81	94	123	147	66	68	90	40	62	81	50	47	53	78	93	83	53	69	82
ENSMUSG00000039239	Tgfb2		chr1	186622792	186705989	-	1366	1141	1337	1524	974	1048	610	700	732	679	444	464	481	773	921	956	877	689	713
ENSMUSG00000001305	Rrp15		chr1	186720978	186749358	-	638	790	571	695	464	435	744	721	613	679	743	558	453	498	710	594	451	463	461
ENSMUSG00000039210	Gpatch2		chr1	187215508	187351704	+	973	822	991	1170	447	677	899	820	868	742	615	639	578	750	902	856	352	577	776
ENSMUSG00000104394	Gm37254		chr1	187236457	187240357	+	150	130	196	197	187	100	118	124	125	88	98	84	95	132	127	143	89	59	106
ENSMUSG00000104245	Gm38155		chr1	187344970	187377469	-	156	105	161	214	48	111	148	110	129	103	93	114	96	125	191	168	25	94	143
ENSMUSG00000026610	Esrrg		chr1	187608791	188214885	+	186	153	199	130	130	96	89	50	86	93	46	35	60	126	90	168	88	79	66
ENSMUSG00000026608	Kctd3		chr1	188971095	189007841	-	1792	1882	1755	2234	1045	1353	1695	1520	1788	1689	1408	1272	1196	1437	1861	1826	852	1192	1440
ENSMUSG00000037624	Kcnk2	overlapping_locus	chr1	189207930	189402273	-	462	502	559	627	359	361	420	329	470	341	301	270	321	364	337	442	335	264	391
ENSMUSG00000026605	Cenpf		chr1	189640606	189688086	-	564	577	739	1089	338	509	1841	1346	1543	1781	1541	1244	926	575	612	614	367	658	311
ENSMUSG00000026604	Ptpn14	overlapping_locus	chr1	189728268	189876695	+	11194	8313	11262	12346	4280	7247	4979	4244	5010	4225	3114	3577	3564	6955	7580	8278	4501	4430	6822
ENSMUSG00000097925	Gm26574		chr1	189833141	189836620	-	36	23	41	48	13	30	35	12	10	13	6	12	7	34	53	27	10	8	38
ENSMUSG00000104435	Gm37422		chr1	189879935	189884652	+	418	380	376	474	277	243	323	320	328	280	256	246	222	253	408	343	185	179	294
ENSMUSG00000026603	Smyd2		chr1	189880492	189922363	-	799	842	846	1037	665	692	971	991	1075	905	885	741	640	588	1029	805	586	633	671
ENSMUSG00000010175	Prox1		chr1	190118035	190170714	-	345	196	377	375	113	137	154	192	142	194	102	111	142	245	270	192	76	164	290
ENSMUSG00000089872	Rps6kc1		chr1	190700202	190911770	-	773	771	736	816	497	498	783	737	690	675	602	532	507	513	653	731	462	468	466
ENSMUSG00000026634	Angel2		chr1	190925112	190946962	+	2578	2560	2755	2903	1493	1791	2151	2000	1887	2046	1550	1462	1476	2070	2555	2190	1305	1666	2249
ENSMUSG00000037568	Vash2		chr1	190947646	190979296	-	68	50	80	107	57	54	103	46	66	100	64	60	58	28	48	63	48	45	46
ENSMUSG00000066595	Flvcr1		chr1	191005847	191026158	-	561	498	547	475	327	352	460	500	469	436	420	381	308	376	468	519	215	386	358
ENSMUSG00000026632	Tatdn3		chr1	191045826	191062932	-	399	413	446	553	271	266	324	212	268	257	200	209	193	316	417	304	147	227	361
ENSMUSG00000062510	Nsl1		chr1	191063012	191086474	+	137	206	110	184	95	109	262	206	224	294	221	128	133	96	133	131	105	101	70
ENSMUSG00000026630	Batf3		chr1	191097847	191108945	+	80	84	64	95	36	36	152	196	86	138	115	41	113	125	159	131	37	65	129
ENSMUSG00000026628	Atf3		chr1	191170296	191218039	-	334	373	264	365	180	175	172	200	423	177	211	169	177	228	236	564	269	244	246
ENSMUSG00000073478	D730003I15Rik		chr1	191224454	191226140	+	109	90	131	169	104	82	75	120	86	64	62	56	56	109	117	106	63	83	182
ENSMUSG00000037499	Nenf		chr1	191306789	191318194	-	1110	1435	1090	1424	1040	759	799	778	847	740	720	579	662	658	862	975	1276	721	855
ENSMUSG00000026627	Pacc1		chr1	191325912	191350914	+	171	163	203	254	92	111	157	115	120	175	105	127	125	166	198	177	78	113	148
ENSMUSG00000026626	Ppp2r5a		chr1	191351975	191403272	-	5185	4848	5170	5227	2260	2948	4038	4058	3954	3643	2869	2803	2889	3417	4205	4330	2243	2999	3415
ENSMUSG00000037474	Dtl		chr1	191537356	191575544	-	326	298	241	404	167	213	502	481	486	527	424	256	315	223	342	279	134	147	176
ENSMUSG00000037461	Ints7		chr1	191575636	191623688	+	1051	996	993	1157	522	701	1436	1448	1403	1437	1096	914	881	856	1237	1004	498	638	816
ENSMUSG00000026623	Lpgat1		chr1	191717834	191784255	+	1867	1431	2310	2115	938	1207	1475	1263	1456	1393	990	1158	1073	1268	1467	1536	465	1288	1402
ENSMUSG00000026622	Nek2		chr1	191821444	191833050	+	230	273	235	389	191	211	827	605	804	763	787	600	421	236	253	309	326	312	147
ENSMUSG00000055833	1700034H15Rik		chr1	191886130	191907527	-	150	127	138	174	47	96	170	192	196	160	128	149	125	131	178	113	40	93	142
ENSMUSG00000037434	Slc30a1		chr1	191906767	191913247	+	2312	2088	2256	2526	979	1559	3884	4633	4115	3619	2843	3564	2753	2108	2837	2296	1072	1888	1771
ENSMUSG00000026637	Traf5	fragmented_locus	chr1	191997205	192092559	-	567	520	538	737	363	337	276	302	354	274	235	230	269	453	511	421	265	298	419
ENSMUSG00000037395	Rcor3		chr1	192098546	192138062	-	1145	1068	1341	1394	599	797	1048	924	1051	972	736	800	726	968	1229	1086	437	799	1076
ENSMUSG00000097316	Gm10516		chr1	192136896	192151026	+	249	282	289	324	142	172	252	182	238	208	164	144	165	235	245	171	133	169	254
ENSMUSG00000058248	Kcnh1		chr1	192190774	192510159	+	544	646	527	579	217	502	587	449	612	603	507	477	305	340	394	651	203	359	263
ENSMUSG00000037375	Hhat		chr1	192496711	192771223	-	101	142	90	166	87	89	85	46	126	106	82	72	84	76	117	84	83	79	90
ENSMUSG00000016262	Sertad4		chr1	192844488	192855756	-	3365	3326	3490	3369	1709	2659	1664	1357	1671	1825	1323	1221	1168	2336	2351	2262	1472	1749	2067
ENSMUSG00000089812	Gm15867		chr1	192854923	192856246	+	57	92	84	121	64	33	41	37	63	49	36	29	37	39	48	53	37	47	54
ENSMUSG00000016181	Utp25		chr1	193091104	193130272	-	715	705	750	832	351	515	659	723	641	643	481	466	431	660	699	586	332	425	623
ENSMUSG00000026638	Irf6	overlapping_locus	chr1	193153111	193172023	+	6250	6032	6681	6073	2485	4029	6010	6111	5786	5287	4668	4449	4272	5011	5302	5118	2251	3653	3849
ENSMUSG00000079144	A130010J15Rik	overlapping_locus	chr1	193168046	193177832	+	398	484	422	458	250	320	405	392	348	430	348	356	328	387	498	383	228	310	356
ENSMUSG00000037318	Traf3ip3		chr1	193175453	193201703	-	74	62	96	84	35	34	46	64	49	76	91	31	50	84	87	98	25	43	79
ENSMUSG00000026639	Lamb3	overlapping_locus	chr1	193207699	193343878	+	4990	5177	4226	4695	3009	4015	3813	3339	3399	3010	2481	2473	2813	3962	4172	4821	3689	3515	2737
ENSMUSG00000016194	Hsd11b1	overlapping_locus	chr1	193221634	193264075	-	482	478	480	535	245	277	200	230	231	257	244	215	239	378	330	434	314	382	348
ENSMUSG00000009633	G0s2		chr1	193272161	193273217	-	1617	1991	1578	1797	1470	1185	570	382	580	587	406	278	374	1239	901	1098	1117	813	917
ENSMUSG00000016179	Camk1g		chr1	193346346	193370298	-	51	40	56	49	27	31	11	23	32	15	13	11	21	31	58	40	41	28	52
ENSMUSG00000097850	Mir205hg	ncRNA_host	chr1	193507238	193510174	-	291	405	320	372	264	265	416	310	277	304	278	265	296	406	510	413	141	232	487
ENSMUSG00000026640	Plxna2	overlapping_locus	chr1	194618218	194816869	+	2020	1872	2209	2407	810	1554	2342	1973	2207	1898	1510	1509	1299	1417	1714	1797	645	1169	1189
ENSMUSG00000016494	Cd34		chr1	194938819	194961279	+	6206	5266	6867	6956	2395	3373	3678	3158	3671	3758	2565	2298	2897	3827	4748	5069	2927	3084	4605
ENSMUSG00000097325	Gm16897		chr1	194955759	194976960	-	100	80	108	146	57	47	53	64	67	52	34	43	56	46	96	92	15	39	86
ENSMUSG00000096929	A330023F24Rik	overlapping_locus	chr1	194976375	195037904	+	227	165	151	193	146	93	65	74	68	85	32	32	63	125	101	86	34	49	141
ENSMUSG00000016493	Cd46	overlapping_locus	chr1	195036826	195092249	-	228	249	365	341	162	212	191	102	168	152	105	131	140	222	204	231	80	143	199
ENSMUSG00000016481	Cr1l		chr1	195097382	195131586	-	2320	2164	2509	2740	1107	1543	1825	1901	1952	1846	1530	1423	1450	1607	2124	2030	1112	1577	1875
ENSMUSG00000050530	Fam171a1		chr2	3114224	3227806	+	684	503	605	762	285	374	496	398	613	514	304	316	336	381	509	552	349	424	468
ENSMUSG00000026643	Nmt2		chr2	3284212	3328877	+	1886	1745	1997	2195	1209	1296	1592	1658	1620	1701	1301	1318	1228	1462	1930	1597	768	1219	1554
ENSMUSG00000049950	Rpp38		chr2	3328949	3332643	-	218	147	203	220	113	104	240	277	206	239	180	189	141	180	175	207	51	151	180
ENSMUSG00000026645	Olah		chr2	3341982	3397210	-	22	28	13	18	11	23	109	195	174	111	124	200	92	31	45	46	23	46	20
ENSMUSG00000026648	Dclre1c		chr2	3424131	3464130	+	881	846	1089	1221	325	652	1041	929	1034	1039	717	804	753	853	1249	987	175	647	1068
ENSMUSG00000026646	Suv39h2		chr2	3455815	3475031	-	146	151	159	189	101	111	274	224	287	234	219	232	177	173	210	180	74	135	150
ENSMUSG00000109865	Hspa14	overlapping_locus	chr2	3488850	3512814	-	1264	1261	1266	1513	748	886	1629	1513	1542	1522	1394	1254	1103	907	1258	1160	596	855	947
ENSMUSG00000051396	Gm45902	overlapping_locus	chr2	3504527	3512790	-	245	233	225	360	129	195	485	439	523	458	300	435	277	225	260	218	90	204	181
ENSMUSG00000039496	Cdnf		chr2	3513030	3526376	+	319	256	284	362	221	206	174	172	229	183	150	132	144	225	262	258	139	181	208
ENSMUSG00000026655	Fam107b		chr2	3570488	3782142	+	2421	2347	2503	2881	757	1485	1643	1502	1654	1549	1254	1294	1237	1900	1987	1770	794	1282	1872
ENSMUSG00000026657	Frmd4a	overlapping_locus	chr2	4017717	4614043	+	1344	1239	1531	1606	621	1072	1569	1485	1710	1610	1186	1217	1146	1199	1521	1355	678	1067	1153
ENSMUSG00000039449	Prpf18		chr2	4622058	4652113	-	2189	1824	1989	2184	1104	1358	1973	1700	1803	1781	1492	1336	1285	1534	1971	1829	827	1193	1550
ENSMUSG00000048186	Bend7		chr2	4717831	4802142	+	55	114	84	92	49	61	70	61	57	51	39	32	64	100	77	46	68	84	75
ENSMUSG00000026662	Sephs1		chr2	4881564	4910557	+	1728	1845	1720	2046	946	1288	1692	1616	1705	1626	1446	1279	1188	1392	1576	1543	1020	1248	1215
ENSMUSG00000026664	Phyh		chr2	4919019	4938730	+	1738	1791	1908	1949	1388	1397	1685	1450	1331	1463	1393	1071	1173	1529	1555	1813	1263	1257	1363
ENSMUSG00000082795	Gm13193	pseudo_consens	chr2	4956069	4956293	-	24	16	24	54	1	12	100	74	40	86	54	38	31	30	38	37	13	25	39
ENSMUSG00000069188	Gm13192		chr2	4959545	4959752	-	15	34	44	62	12	30	57	57	70	75	63	63	60	42	77	67	33	45	64
ENSMUSG00000026668	Ucma		chr2	4976122	4985748	+	555	656	620	868	317	334	191	117	152	213	82	77	96	454	309	323	235	344	368
ENSMUSG00000026669	Mcm10		chr2	4989714	5012791	-	140	180	135	237	100	135	447	355	390	504	441	257	205	144	239	193	129	98	92
ENSMUSG00000026672	Optn		chr2	5020642	5064051	-	918	764	887	921	723	614	617	586	600	604	501	449	500	558	732	713	554	572	675
ENSMUSG00000026676	Ccdc3	overlapping_locus	chr2	5137776	5230878	+	1749	1845	2002	2356	813	1080	1054	1037	1130	1088	711	610	932	1334	1732	1403	1101	882	1258
ENSMUSG00000039145	Camk1d		chr2	5293457	5714515	-	2853	2619	2795	3019	843	1772	2038	2381	2408	1904	1592	1655	1530	1870	2368	2382	842	1432	1624
ENSMUSG00000039128	Cdc123		chr2	5794294	5845164	-	2496	2560	2456	2920	1634	1773	2720	2433	2587	2370	2284	2082	2057	1797	2579	2237	1304	1660	1970
ENSMUSG00000025817	Nudt5		chr2	5845019	5871895	+	924	1025	922	1292	652	708	1722	1458	1445	1462	1522	1198	1134	931	1192	1014	654	779	890
ENSMUSG00000056718	Gm13199		chr2	5862080	5862934	-	61	68	76	70	53	36	56	31	79	92	46	48	46	68	99	65	14	45	69
ENSMUSG00000025816	Sec61a2		chr2	5870987	5895432	-	989	802	984	1062	676	721	855	784	925	851	625	675	571	756	882	898	376	519	802
ENSMUSG00000025815	Dhtkd1		chr2	5896115	5942792	-	272	207	249	294	130	167	158	124	122	122	84	99	99	205	143	176	99	124	190
ENSMUSG00000043241	Upf2		chr2	5951469	6056703	+	2381	2381	2442	2630	2078	1619	1990	1892	1998	1923	1466	1502	1515	1765	2001	1963	993	1389	1791
ENSMUSG00000045319	Proser2		chr2	6097607	6130211	-	481	484	466	494	245	340	723	635	730	619	546	687	513	426	446	437	381	350	279
ENSMUSG00000039063	Echdc3		chr2	6188465	6213033	-	274	298	261	361	136	233	120	85	110	125	73	94	107	209	248	191	180	148	201
ENSMUSG00000039046	Usp6nl		chr2	6322667	6446390	+	3289	3230	3367	3212	1591	2170	2732	3162	3317	2552	2159	2464	1905	2171	2854	2705	1543	1834	1839
ENSMUSG00000002107	Celf2	overlapping_locus	chr2	6539694	7509563	-	2332	2000	2525	2492	1663	1383	1411	1302	1429	1471	1098	927	1109	1526	1871	1915	1325	1356	1756
ENSMUSG00000079604	Gm13219		chr2	9352431	9447676	+	252	346	312	316	136	335	187	186	185	158	164	198	131	254	338	293	125	283	279
ENSMUSG00000015619	Gata3	overlapping_locus	chr2	9857078	9890034	-	7722	7968	7229	7684	5633	4450	5527	5253	4555	4121	3337	3516	4137	5853	5824	5750	4032	3351	4470
ENSMUSG00000025783	4930412O13Rik		chr2	9881252	9883921	+	144	128	115	152	64	66	106	86	61	73	40	61	71	82	95	135	23	61	129
ENSMUSG00000079602	9230102O04Rik	overlapping_locus	chr2	9883041	9889540	-	84	48	73	110	23	52	73	56	55	75	30	30	39	52	58	65	15	35	93
ENSMUSG00000025782	Taf3		chr2	9914552	10048596	-	845	930	868	1032	968	511	753	690	689	686	647	550	499	623	656	785	698	556	615
ENSMUSG00000025781	Atp5c1	ncRNA_host	chr2	10056016	10080510	-	5175	5203	5329	5273	3379	3328	5045	4660	4976	5059	4559	3649	4089	3852	4790	4569	4191	3462	4217
ENSMUSG00000037262	Kin		chr2	10080593	10092806	+	706	664	598	766	547	502	642	519	513	498	483	430	468	468	691	521	295	418	629
ENSMUSG00000037254	Itih2		chr2	10094593	10131396	-	185	122	135	138	45	73	49	44	81	41	26	28	44	75	73	103	110	56	71
ENSMUSG00000025780	Itih5		chr2	10153571	10256529	+	3190	2592	3704	3623	837	1442	2653	2265	2936	2756	1270	1660	1976	1969	2428	2606	742	1561	2093
ENSMUSG00000026778	Prkcq	overlapping_locus	chr2	11172108	11301222	+	730	747	588	444	438	357	679	594	522	608	447	452	513	357	473	541	340	366	359
ENSMUSG00000026773	Pfkfb3	overlapping_locus	chr2	11471433	11554077	-	1463	1351	1670	1719	857	845	1121	1038	1144	1140	958	873	1037	1089	1170	1378	761	992	1204
ENSMUSG00000037197	Rbm17		chr2	11585437	11604153	-	2540	2425	2238	2656	1639	1598	2243	2243	2200	2104	2217	1832	1698	1742	2245	2060	1344	1525	1871
ENSMUSG00000026770	Il2ra		chr2	11642807	11693193	+	116	75	61	94	19	55	111	88	62	90	120	64	73	51	122	107	54	92	79
ENSMUSG00000023206	Il15ra		chr2	11705290	11734317	+	1567	1283	1414	1754	598	853	1027	958	831	882	676	683	679	923	1298	1328	359	694	1164
ENSMUSG00000058594	Fbh1		chr2	11742573	11777582	-	2163	2035	2214	2517	1148	1350	1937	1786	1764	1721	1384	1345	1393	1736	1840	1912	936	1266	1729
ENSMUSG00000047909	Ankrd16		chr2	11777876	11790329	+	3186	3356	3526	4281	1705	2321	2924	2467	2803	2591	1960	2171	2008	2533	3718	2906	902	1892	3215
ENSMUSG00000026768	Itga8	overlapping_locus	chr2	12106632	12301922	-	684	440	657	794	209	288	290	230	424	274	221	160	202	364	338	413	150	297	374
ENSMUSG00000026767	Mindy3	overlapping_locus	chr2	12347263	12419470	-	1929	1862	2095	2086	704	1298	2229	2364	1956	1927	1599	1739	1512	1637	1875	1673	591	1211	1472
ENSMUSG00000104449	Gm37255	overlapping_locus	chr2	12372212	12375271	-	31	30	33	34	89	18	18	24	21	21	24	11	20	13	29	18	37	8	24
ENSMUSG00000026730	Pter		chr2	12924041	13003455	+	557	531	512	468	258	378	288	299	303	300	264	247	223	364	406	418	206	243	283
ENSMUSG00000026727	Rsu1	overlapping_locus	chr2	13076821	13271415	-	1250	1192	1281	1647	716	800	977	862	1030	949	820	728	841	956	1158	1208	830	895	989
ENSMUSG00000026726	Cubn		chr2	13276338	13491813	-	270	210	268	225	133	167	98	51	84	115	54	47	73	125	133	189	93	74	108
ENSMUSG00000026723	Trdmt1		chr2	13509014	13544668	-	258	271	281	277	137	168	248	146	222	215	179	166	176	164	213	211	81	174	211
ENSMUSG00000026728	Vim		chr2	13573927	13582826	+	47773	40577	43215	52112	19822	24949	33399	32387	33562	31305	27978	21953	27308	31228	39913	42113	31426	31756	37931
ENSMUSG00000003418	St8sia6		chr2	13651021	13794064	-	182	168	203	193	75	108	154	133	133	178	129	102	85	131	138	132	45	64	96
ENSMUSG00000063275	Hacd1	overlapping_locus	chr2	13850282	14056135	-	136	88	113	126	118	65	92	97	119	87	80	74	71	73	77	97	61	80	74
ENSMUSG00000026718	Stam		chr2	14074098	14149634	+	973	825	830	783	338	547	872	956	740	703	702	717	624	717	887	795	316	632	678
ENSMUSG00000103901	Gm37499		chr2	14149820	14153297	+	34	54	35	25	25	25	32	22	32	32	20	31	22	26	28	45	8	28	33
ENSMUSG00000026712	Mrc1	ncRNA_host	chr2	14229392	14332057	+	3009	2711	3569	3888	813	1912	3096	2889	3340	3848	2754	2170	2421	2295	4139	4203	875	2880	3563
ENSMUSG00000057914	Cacnb2	overlapping_locus	chr2	14603088	14987908	+	104	80	122	155	43	64	50	38	46	52	39	29	38	64	78	50	41	39	80
ENSMUSG00000026707	Nsun6	overlapping_locus	chr2	14995131	15055069	-	303	293	311	329	149	231	276	311	285	280	182	239	205	312	304	316	134	179	268
ENSMUSG00000017418	Arl5b		chr2	15049395	15082456	+	1970	1775	2259	2202	713	1275	2112	2251	2313	2051	1618	1757	1358	1380	1981	1795	501	1211	1429
ENSMUSG00000026748	Plxdc2		chr2	16356304	16755839	+	6762	6407	7383	6837	1806	3981	4935	5149	5161	4349	3379	4122	4239	4862	5216	5461	2115	3469	3962
ENSMUSG00000053702	Nebl		chr2	17343909	17731464	-	1277	1164	1317	1340	417	709	1397	1141	1299	961	777	988	849	811	935	980	323	635	757
ENSMUSG00000054057	A930004D18Rik		chr2	18025193	18037737	-	270	320	275	326	129	187	300	232	255	248	158	178	166	167	231	205	148	174	206
ENSMUSG00000054074	Skida1		chr2	18040676	18049051	-	185	107	141	138	68	74	161	145	109	164	92	78	115	155	152	136	71	64	108
ENSMUSG00000026743	Mllt10	ncRNA_host	chr2	18055237	18212388	+	2203	1962	2345	2273	1079	1402	2000	1679	1850	1782	1374	1430	1235	1552	1903	1881	725	1208	1675
ENSMUSG00000026740	Dnajc1	overlapping_locus	chr2	18195654	18392830	-	1987	1549	1907	2236	1326	1232	1725	1675	1604	1708	1211	1212	1207	1464	1715	1628	1033	1148	1487
ENSMUSG00000051154	Commd3		chr2	18672384	18676231	+	1562	1554	1537	1805	964	978	1323	1155	1347	1376	1209	1033	1034	1144	1256	1199	743	952	1147
ENSMUSG00000026739	Bmi1		chr2	18677018	18686629	+	1238	1241	1404	1293	781	906	937	986	1078	993	831	737	780	920	1147	1052	441	903	908
ENSMUSG00000026737	Pip4k2a		chr2	18842255	18998126	-	1559	1326	1722	1894	663	901	1144	994	1137	1288	1009	763	848	1285	1541	1484	563	951	1559
ENSMUSG00000023094	Msrb2		chr2	19371440	19394976	+	234	198	203	260	177	101	115	111	107	169	73	61	89	148	117	159	125	79	165
ENSMUSG00000043415	Otud1		chr2	19657752	19660583	+	2970	2704	2648	2827	786	1644	1465	1575	1564	1288	712	914	1221	2250	2399	2166	832	1241	1814
ENSMUSG00000036617	Etl4	overlapping_locus	chr2	19909780	20810713	+	3180	2660	3437	3566	1656	2381	2780	2506	2937	2916	2134	2224	1888	2358	3019	2692	1341	2088	2238
ENSMUSG00000036591	Arhgap21	overlapping_locus	chr2	20847919	20968881	-	3776	3336	3868	4070	1318	2269	2796	2810	3270	2787	2157	1933	1975	2383	3025	3008	1389	2162	2563
ENSMUSG00000075514	Gm13375		chr2	20969054	20969997	+	308	350	290	361	171	175	179	130	240	194	148	113	108	193	279	281	198	168	191
ENSMUSG00000026679	Enkur	ncRNA_host	chr2	21180731	21205365	-	63	65	98	47	43	49	37	39	36	40	36	41	41	50	70	33	39	37	32
ENSMUSG00000048550	Thnsl1		chr2	21205724	21215009	+	135	134	133	158	93	132	150	168	145	103	120	110	106	98	128	223	61	89	144
ENSMUSG00000026786	Apbb1ip		chr2	22774094	22875653	+	808	627	883	898	244	421	995	1036	984	1034	676	512	828	656	1069	880	361	682	913
ENSMUSG00000026784	Pdss1	ncRNA_host	chr2	22895522	22940266	+	301	294	211	306	242	237	439	455	386	405	539	427	281	247	421	321	245	414	260
ENSMUSG00000058835	Abi1	overlapping_locus	chr2	22940073	23040241	-	5078	5057	5165	5789	1891	3342	5016	4814	4862	4557	3875	4111	3539	4201	4908	4781	1702	3344	4036
ENSMUSG00000026781	Acbd5		chr2	23068167	23115558	+	2510	2485	2642	2913	1235	1855	2295	2227	2225	2060	1656	1981	1688	2059	2471	2145	691	1611	1862
ENSMUSG00000026779	Mastl		chr2	23115606	23156024	-	171	215	216	204	91	160	441	414	448	454	416	350	271	130	177	191	123	171	89
ENSMUSG00000026775	Yme1l1		chr2	23156369	23199260	+	3688	3424	3708	3664	1831	2455	3950	4235	3611	3759	2908	3105	2792	2885	3424	3355	1010	2397	2646
ENSMUSG00000081648	Gm13423	pseudo_consens	chr2	23202033	23203683	+	24	16	30	37	58	7	10	15	14	5	11	12	13	16	24	5	19	9	21
ENSMUSG00000102704	Gm38309		chr2	23492931	23494448	+	59	67	53	55	38	34	21	14	43	24	18	26	26	33	37	54	9	19	47
ENSMUSG00000026771	Spopl		chr2	23506220	23572106	-	1086	954	1114	1336	541	617	887	865	946	863	657	723	631	775	996	1002	293	617	829
ENSMUSG00000026986	Hnmt		chr2	24002910	24049394	-	237	268	282	303	161	167	152	147	186	170	83	76	132	167	220	221	79	120	218
ENSMUSG00000026985	Il1f8		chr2	24153161	24160519	+	790	826	994	826	278	604	2433	2920	2337	2129	1935	2549	1807	937	1505	1117	334	952	936
ENSMUSG00000044103	Il1f9		chr2	24186476	24193568	+	1628	1372	1516	1662	439	942	3699	3599	3380	3169	2712	2942	2522	1801	2228	1975	630	1281	1469
ENSMUSG00000026984	Il1f6		chr2	24215418	24225702	+	215	258	204	252	226	153	3206	3711	3001	3099	3237	3460	2335	555	1240	723	407	821	576
ENSMUSG00000083172	Gm13409		chr2	24261830	24266338	-	28	16	14	20	5	9	32	26	30	42	31	30	28	28	23	23	3	9	38
ENSMUSG00000026983	Il1f5		chr2	24276954	24283426	+	5538	5994	5888	6902	1971	4042	15270	16514	14857	13566	11152	14584	11692	6588	9637	7892	2616	5951	6703
ENSMUSG00000046845	Il1f10		chr2	24291196	24293820	+	318	444	439	400	245	253	214	216	236	217	121	194	163	408	500	321	236	276	408
ENSMUSG00000026981	Il1rn		chr2	24336853	24351494	+	2053	2226	2143	1863	758	1249	4245	5188	3977	3747	3503	3253	3122	1569	2436	1940	1186	1684	1402
ENSMUSG00000026979	Psd4		chr2	24367580	24414954	+	2510	2734	2373	2766	1104	1915	2611	2691	2414	2235	2160	2409	1728	1870	2523	2377	1223	1752	1836
ENSMUSG00000036893	Ehmt1		chr2	24789928	24919614	-	2535	2094	2103	2498	1100	1628	1996	1654	1783	1893	1325	1484	1344	1826	2016	1812	903	1336	1576
ENSMUSG00000026972	Arrdc1		chr2	24925352	24935252	-	1995	2673	2173	2999	1192	1483	1637	1482	1382	1465	1108	1039	1129	1893	2151	1975	1021	1253	1919
ENSMUSG00000026974	Zmynd19		chr2	24949792	24962075	+	828	925	868	887	498	596	906	942	915	886	825	691	620	573	838	862	483	594	639
ENSMUSG00000026975	Dph7		chr2	24962400	24972163	+	545	583	593	602	296	379	509	429	403	419	308	319	279	357	509	506	327	310	396
ENSMUSG00000036850	Mrpl41		chr2	24974117	24975098	-	597	720	650	783	583	522	751	673	687	714	717	607	562	611	724	543	575	597	649
ENSMUSG00000036833	Pnpla7	overlapping_locus	chr2	24976033	25054057	+	1192	1113	1297	1485	732	971	748	687	799	799	639	615	668	878	1042	1338	827	892	1162
ENSMUSG00000006476	Nsmf	ncRNA_host	chr2	25054355	25062881	+	1659	1504	1677	2240	820	1053	1272	1224	1226	1294	943	869	930	1217	1560	1429	991	923	1368
ENSMUSG00000087028	Gm13387		chr2	25122603	25145396	-	29	30	45	80	12	27	26	14	15	23	11	20	9	18	31	49	16	12	50
ENSMUSG00000078202	Nrarp		chr2	25180758	25183339	+	1057	1063	841	1073	233	534	1134	1152	1017	919	901	807	714	699	1126	835	410	577	570
ENSMUSG00000059555	Tor4a		chr2	25192966	25196886	-	1062	905	820	1326	497	685	885	780	726	830	710	648	732	873	923	971	758	732	864
ENSMUSG00000013465	Nelfb		chr2	25199712	25211489	-	3033	2988	2871	3716	1689	2009	2874	2607	2748	2523	2123	2025	2009	2408	2862	2796	1834	1832	2357
ENSMUSG00000036752	Tubb4b		chr2	25222160	25224702	-	10768	13045	9755	10736	5173	7821	10903	12829	10753	9948	9897	8781	8412	7886	10598	9074	6666	7352	5549
ENSMUSG00000089953	Rnf224		chr2	25234476	25236787	-	73	68	35	41	29	37	59	81	108	62	96	101	52	35	43	61	20	45	22
ENSMUSG00000036731	Cysrt1		chr2	25238818	25242452	-	2156	2279	1901	2406	947	1285	2529	2945	2573	2457	2296	2773	2104	1698	2524	2142	1247	1493	1880
ENSMUSG00000044628	Rnf208		chr2	25242929	25244262	+	1093	1160	978	1002	445	692	966	1019	1021	778	764	836	737	761	1056	897	753	700	593
ENSMUSG00000078201	Tmem203		chr2	25255439	25256292	+	362	371	271	468	177	187	231	265	265	268	213	178	191	224	292	388	196	182	248
ENSMUSG00000048707	Tprn		chr2	25262618	25269885	+	808	925	895	861	440	594	649	669	596	566	570	532	504	613	727	661	564	507	489
ENSMUSG00000026966	Ssna1		chr2	25271039	25272438	-	1364	1442	1403	1692	967	976	1670	1484	1328	1474	1355	1189	1049	1077	1415	1183	1165	992	1113
ENSMUSG00000026965	Anapc2		chr2	25272478	25285915	+	4646	4661	4357	5137	2240	3068	3988	3559	3854	3401	2907	2798	2782	3428	4089	3752	2567	2812	3277
ENSMUSG00000036646	Man1b1	ncRNA_host	chr2	25332338	25352212	+	3154	3031	3131	3461	1479	2260	2644	2511	2412	2409	1935	1971	1855	2438	3011	2732	1822	2007	2383
ENSMUSG00000026958	Dpp7		chr2	25352276	25356359	-	599	651	717	842	359	410	715	669	658	712	454	446	528	577	780	659	284	359	644
ENSMUSG00000026956	Uap1l1		chr2	25359889	25365682	-	1394	1578	1562	1862	909	996	1106	946	1044	1026	739	663	790	1219	1636	1404	1000	1068	1544
ENSMUSG00000026955	Sapcd2		chr2	25372321	25378213	+	158	191	163	287	115	138	342	258	295	370	301	262	180	111	150	128	167	176	67
ENSMUSG00000015085	Entpd2	overlapping_locus	chr2	25395874	25401321	+	1528	1505	1498	1810	749	1315	770	641	673	650	540	539	537	996	1021	1033	912	931	931
ENSMUSG00000015094	Npdc1	overlapping_locus	chr2	25399351	25409494	+	2118	2205	1965	2437	1115	1353	1505	1325	1489	1431	1134	951	1124	1448	1802	1815	1426	1244	1534
ENSMUSG00000036587	Fut7		chr2	25423267	25426374	+	24	23	20	22	9	12	26	25	18	34	25	24	20	26	38	34	10	29	31
ENSMUSG00000026944	Abca2	ncRNA_host	chr2	25428703	25448540	+	3329	3475	3308	4003	1272	2472	2771	2396	2626	2264	1558	1820	1655	2383	3054	2917	1493	1734	2182
ENSMUSG00000047617	Paxx		chr2	25455141	25461094	-	872	765	722	994	469	542	670	617	544	530	428	470	496	705	784	666	550	451	638
ENSMUSG00000015093	Clic3		chr2	25456838	25458776	+	2687	3111	2284	3261	1054	1843	2471	2468	2185	1728	1621	2098	1930	2160	2704	2317	1453	1529	1739
ENSMUSG00000015090	Ptgds		chr2	25466709	25470046	-	118	189	125	200	96	115	99	121	73	100	111	133	74	116	147	126	119	105	163
ENSMUSG00000015083	C8g		chr2	25498651	25501719	-	121	86	101	121	32	84	90	59	70	76	67	57	56	78	82	70	51	62	71
ENSMUSG00000015095	Fbxw5		chr2	25500750	25505471	+	2457	2669	2295	2889	1252	1694	1862	1661	2010	1705	1420	1549	1357	1652	2474	2042	1337	1448	1662
ENSMUSG00000026942	Traf2		chr2	25517982	25546940	-	1174	1185	1065	1604	678	750	1097	1055	795	1018	843	697	775	971	1016	983	670	702	943
ENSMUSG00000015092	Edf1		chr2	25557847	25562082	+	2645	3032	2272	3014	1947	1786	3226	3083	2820	2905	2685	2143	2281	2099	2665	2419	2649	1915	2198
ENSMUSG00000026941	Mamdc4	overlapping_locus	chr2	25563115	25574845	-	115	150	170	189	77	118	117	113	113	98	81	80	87	127	153	94	56	77	137
ENSMUSG00000036504	Phpt1	overlapping_locus	chr2	25573430	25575224	-	176	229	187	227	158	124	172	157	129	167	123	100	120	134	156	170	160	117	146
ENSMUSG00000029419	Ajm1		chr2	25575416	25581757	-	59	35	57	69	42	36	32	15	16	31	6	20	22	23	11	30	24	14	46
ENSMUSG00000015087	Rabl6		chr2	25583018	25608521	-	4176	4209	3683	4704	2486	2478	3555	3661	3682	3495	2756	2641	2690	3043	3953	3477	2539	2209	3092
ENSMUSG00000026940	Ccdc183		chr2	25608635	25617678	-	29	42	50	39	13	44	43	22	22	42	13	14	29	35	33	27	14	19	27
ENSMUSG00000026939	Tmem141		chr2	25620067	25622005	-	220	269	260	347	155	166	264	191	174	194	155	142	140	199	219	275	158	177	219
ENSMUSG00000026938	Fcna		chr2	25624666	25628030	-	166	186	173	293	66	127	44	62	81	51	83	84	42	105	123	145	81	215	118
ENSMUSG00000049086	Bmyc		chr2	25706739	25707721	+	159	130	89	98	34	55	79	61	83	82	53	49	58	87	82	59	62	49	83
ENSMUSG00000058740	Kcnt1		chr2	25863734	25918273	+	27	27	43	51	22	58	24	11	27	20	17	9	11	21	25	19	10	21	31
ENSMUSG00000026933	Camsap1		chr2	25926838	25983282	-	2062	2085	2261	2499	1074	1518	1956	2318	1951	1701	1496	1745	1469	2107	2219	1867	976	1279	1524
ENSMUSG00000036352	Ubac1		chr2	25998543	26021747	-	1271	1351	1332	1467	1027	868	1402	1284	1316	1390	1162	962	1015	1070	1331	1217	945	812	1091
ENSMUSG00000026932	Nacc2		chr2	26055535	26123220	-	1460	1333	1591	1766	890	965	1008	811	997	805	699	634	705	1171	1205	1467	809	849	1256
ENSMUSG00000087679	Tmem250-ps		chr2	26136814	26140521	-	1997	2084	1981	2436	1261	1352	2354	2190	2168	1939	1955	1599	1432	1479	2040	2020	1595	1313	1474
ENSMUSG00000087595	1810012K08Rik		chr2	26138546	26139543	+	50	47	55	79	26	31	81	107	64	66	48	51	35	32	71	55	19	37	72
ENSMUSG00000036327	Qsox2		chr2	26208637	26237525	-	1355	1396	1343	1445	572	923	1293	1204	1127	1130	955	870	884	1057	1265	1076	573	799	1002
ENSMUSG00000048038	Ccdc187		chr2	26243469	26294557	-	180	215	300	216	60	166	287	215	240	219	128	200	154	166	211	174	45	134	180
ENSMUSG00000026930	Gpsm1		chr2	26315515	26348237	+	2805	2766	2671	3196	1007	1844	2451	2672	2346	2312	1555	2217	1808	2254	3076	2613	947	1489	2221
ENSMUSG00000075467	Dnlz		chr2	26348121	26352110	-	921	1073	874	1142	625	604	1135	1074	1226	1124	839	760	772	766	1035	938	707	698	748
ENSMUSG00000026928	Card9		chr2	26352176	26360918	-	528	701	478	743	294	287	472	367	341	511	387	273	293	441	560	593	260	296	562
ENSMUSG00000086779	Gm13562		chr2	26352645	26371952	+	33	61	34	40	12	41	37	17	30	30	25	18	26	39	52	54	10	15	49
ENSMUSG00000036281	Snapc4		chr2	26362765	26380653	-	1492	1492	1437	1665	750	1030	1161	1246	1106	1120	877	955	883	1222	1602	1246	601	767	1214
ENSMUSG00000085767	Gm13563		chr2	26381526	26389018	+	115	101	100	129	31	70	61	50	83	77	51	68	47	77	144	112	26	51	88
ENSMUSG00000026927	Entr1		chr2	26382802	26389316	-	1843	1801	2080	2196	1073	1266	1876	1811	1467	1513	1391	1291	1218	1485	1886	1570	847	1209	1720
ENSMUSG00000026926	Pmpca		chr2	26389339	26397122	+	2360	2174	2179	2265	1251	1560	2453	2445	2474	2111	2097	1885	1621	1672	2237	2248	1305	1681	1610
ENSMUSG00000026925	Inpp5e		chr2	26396249	26409203	-	923	875	1002	1159	445	738	684	634	780	663	575	591	547	779	1000	820	502	569	744
ENSMUSG00000026924	Sec16a		chr2	26409431	26445216	-	4555	4432	4735	5160	1688	3451	4645	5021	4907	3826	3382	3654	3340	3815	4530	4269	2041	2819	3108
ENSMUSG00000026923	Notch1	ncRNA_host	chr2	26457903	26516663	-	6641	6119	6736	7848	1894	4626	6186	5777	6310	5536	3791	4839	3916	5777	6343	5999	2251	3916	4124
ENSMUSG00000026921	Egfl7	overlapping_locus	chr2	26580014	26593120	+	1131	1077	1121	1427	908	715	841	727	879	763	629	626	674	767	926	948	981	705	983
ENSMUSG00000026922	Agpat2		chr2	26593057	26604417	-	1147	1230	1138	1312	703	990	839	765	803	789	698	617	651	807	933	856	859	790	847
ENSMUSG00000036186	Dipk1b	overlapping_locus	chr2	26628457	26636497	+	107	106	146	186	69	70	86	75	78	109	73	66	43	108	106	96	85	41	83
ENSMUSG00000077192	Snora17		chr2	26639190	26639321	-	43	85	47	91	72	29	99	128	76	86	109	97	68	38	82	96	64	58	63
ENSMUSG00000036160	Surf6		chr2	26888628	26902879	-	1032	1084	885	1123	520	680	1033	1105	920	999	791	827	682	747	1013	935	532	702	721
ENSMUSG00000015776	Med22		chr2	26905262	26910677	-	2878	3280	2889	3756	1633	2349	2749	2711	2526	2390	2286	2062	1908	2404	3061	2574	2073	2239	2388
ENSMUSG00000062647	Rpl7a	ncRNA_host	chr2	26910764	26913318	+	14171	15995	12342	17852	7299	9213	19744	17017	16643	18571	17350	14383	13290	11448	16014	13543	12858	10898	14590
ENSMUSG00000015790	Surf1		chr2	26913381	26916530	-	1303	1314	1315	1569	714	846	879	787	907	866	694	674	686	964	1123	1121	787	717	1170
ENSMUSG00000014873	Surf2		chr2	26916367	26920183	+	867	834	973	1143	512	645	883	866	751	896	718	685	663	706	1005	747	394	590	878
ENSMUSG00000014867	Surf4		chr2	26920040	26933928	-	6404	6822	6445	8262	4036	4678	7238	7819	7295	6669	6063	5457	4901	4884	6829	6718	4873	4991	4637
ENSMUSG00000052406	Rexo4		chr2	26953563	26964386	-	1579	1300	1539	1755	938	1120	1779	1539	1403	1518	1257	1247	1166	1317	1686	1316	742	1153	1427
ENSMUSG00000015488	Cacfd1		chr2	27009926	27021089	+	1722	1725	1663	1949	1278	1218	1537	1392	1346	1355	1033	1053	888	1375	1686	1562	1147	1137	1260
ENSMUSG00000036067	Slc2a6		chr2	27021363	27027998	-	90	130	95	168	34	62	121	94	99	144	108	60	70	77	140	159	63	114	104
ENSMUSG00000087364	Gm13398		chr2	27037285	27040853	+	67	118	76	142	42	100	89	37	73	64	68	55	45	120	125	108	93	115	123
ENSMUSG00000036040	Adamtsl2		chr2	27079379	27108981	+	162	145	158	201	65	98	62	31	50	37	33	26	26	80	99	97	68	42	67
ENSMUSG00000009614	Sardh		chr2	27188393	27248337	-	430	387	415	544	192	253	531	442	615	551	398	374	345	292	298	424	321	231	237
ENSMUSG00000009621	Vav2		chr2	27262104	27427033	-	680	614	665	649	315	408	543	427	523	516	347	311	320	477	547	582	284	375	545
ENSMUSG00000109946	Brd3os		chr2	27442324	27444221	+	118	92	88	130	67	86	95	85	90	98	89	62	86	61	146	90	74	81	86
ENSMUSG00000026918	Brd3	ncRNA_host	chr2	27445579	27507662	-	4063	3947	4076	5055	3060	2682	3576	3090	3113	3095	2502	2414	2325	3095	3867	3483	2634	2375	3187
ENSMUSG00000026917	Wdr5		chr2	27515157	27536535	+	1814	1860	1964	1843	1079	1218	1781	1729	1700	1694	1510	1361	1286	1372	1816	1576	1135	1207	1262
ENSMUSG00000085929	Gm13421		chr2	27540426	27543362	+	20	17	48	59	27	34	30	27	31	33	17	21	14	33	40	16	7	28	47
[truncated: 15,377 more rows]

## Sheet: Log2_CPMs
gene_id	gene_name	tag	seqnames	start	end	strand	CTRL_m17	CTRL_m18	CTRL_m19	CTRL_m20	CTRL_m3	CTRL_m6	IMQ_treat_m9	IMQ_treat_m11	IMQ_treat_m13	IMQ_treat_m15	IMQ_treat_m2	IMQ_treat_m4	IMQ_treat_m7	IMQ_un_m10	IMQ_un_m12	IMQ_un_m14	IMQ_un_m1	IMQ_un_m5	IMQ_un_m8
[truncated: 16,575 more rows]

[truncated: 1 more sheets: Differential_Expression_Results]
