# Supplementary material for: The interferon-rich skin environment regulates Langerhans cell ADAM17 to promote photosensitivity in lupus
Source: eLife. 2024 Jun 11;13:e85914. doi: 10.7554/eLife.85914 (PMC11213570; doi:10.7554/eLife.85914)
Supplement: Supplementary file 8. [file elife-85914-supp8.xlsx]

## Sheet: Table S8. Differential expresse
Pathway	size	logFC	lowCI	highCI	PValue	FDR	Genes
REACTOME_NEUTROPHIL_DEGRANULATION	383	0.191498	0.133205	0.250363	8.69065e-09	2.05013e-05	ACTR1B, IDH1, XRCC5, CXCR2, TMBIM1, SLC11A1, STK11IP, CAB39, PSMD1, SLCO4C1, SERPINB12, SERPINB10, CD55, PIGR, NFASC, CHIT1, ARL8A, PKP1, PTPRC, ARPC5, QSOX1, PRDX6, CREG1, FCER1G, NCSTN, TMEM63A, DEGS1, COMMD3, TUBB4B, DPP7, AGPAT2, SURF4, SPTAN1, LCN2, PTGES2, RAB14, GSN, STOM, PSMB7, TNFAIP6, PSMD14, GCA, ITGAV, PTPRJ, PSMC3, COMMD9, CD44, CAT, SRP14, SNAP23, B2M, ATP8B4, SIRPA, CD93, CST3, PY…
REACTOME_INNATE_IMMUNE_SYSTEM	807	0.1648	0.107403	0.22164	8.58141e-08	9.19439e-05	ATP6V1H, LY96, ACTR1B, CASP8, ABI2, CREB1, IDH1, XRCC5, CXCR2, ARPC2, AAMP, TMBIM1, SLC11A1, STK11IP, CAB39, PSMD1, LRRFIP1, SLCO4C1, BCL2, SERPINB12, SERPINB10, PTPN4, ACTR3, CD55, PIGR, MAPKAPK2, IKBKE, NFASC, CHIT1, ARL8A, PKP1, PTPRC, CFH, ARPC5, NCF2, DHX9, QSOX1, PRDX6, DNM3, CREG1, CD247, FCER1G, NCSTN, FCER1A, AIM2, TMEM63A, DEGS1, TLR5, CD46, PRKCQ, COMMD3, ABI1, TUBB4B, DPP7, C8G, TRAF2…
REACTOME_ANTIMICROBIAL_PEPTIDES	23	0.655131	0.472444	0.838767	1.33027e-07	9.19439e-05	SLC11A1, LCN2, TLR2, S100A7A, S100A8, S100A9, PGLYRP4, PGLYRP3, TLR1, CD4, PGLYRP1, ART1, DEFB1, CCR2, ATOX1, CHGA, RNASE6, CTSG, CLU, CCR6, PGLYRP2, PDZD11, ATP7A
REACTOME_PEPTIDE_LIGAND_BINDING_RECEPTORS	87	0.300984	0.200448	0.402507	1.55903e-07	9.19439e-05	NPBWR1, CXCR2, CCL20, ACKR3, CXCR4, GPR37L1, XCL1, ACKR1, APLNR, EDN3, RXFP1, PENK, CCL19, EDN2, ECE1, NMU, CXCL5, PF4, CXCL1, CXCL2, CXCL9, CXCL10, CXCL13, GPER1, GPR37, TACR1, PROKR1, OXTR, GHRL, CXCL12, C3AR1, HEBP1, C5AR2, C5AR1, NMB, CCL25, NPY1R, EDNRA, CCL22, CX3CL1, CCL17, MC1R, AGT, ACKR4, CCRL2, CCR4, CX3CR1, ACKR2, CCR9, CXCR6, XCR1, CCR1, CCR2, CCR5, PSAP, KISS1R, AVPR1A, CXCL16, CCL2…
REACTOME_TOLL_LIKE_RECEPTOR_TLR1_TLR2_CASCADE	104	0.132036	0.0926127	0.1707	2.64404e-07	0.000124746	LY96, CASP8, CREB1, MAPKAPK2, TRAF2, ATF2, TRAF6, UBE2V1, TLR2, S100A1, S100A8, S100A9, ALPK1, TIFA, NFKB1, RIPK2, MAP3K7, TLR4, JUN, RPS6KA1, CD36, TNIP2, TLR1, TLR6, UBC, HMGB1, CUL1, NOD1, IRAK2, USP18, NFKBIB, VRK3, MEF2A, MAPK3, SIGIRR, MAP2K7, IKBKB, PPP2CB, DUSP4, UBA52, N4BP1, NOD2, NLRC5, ECSIT, TIRAP, NLRX1, PPP2R1B, MAP2K1, DUSP7, MAPKAPK3, MYD88, TAB2, S100B, IKBIP, UBE2N, DUSP6, IRAK…
REACTOME_DISEASES_OF_IMMUNE_SYSTEM	27	0.485958	0.358573	0.614002	3.25391e-07	0.000127933	LY96, TLR5, TLR2, S100A1, S100A8, S100A9, NFKB1, TLR4, CD36, TLR1, TLR6, HMGB1, IKBKB, TLR3, TIRAP, MYD88, NFKBIA, TRAF3, IRAK4, TICAM1, CD14, UNC93B1, RELA, CHUK, NFKB2, IKBKG, BTK
REACTOME_TOLL_LIKE_RECEPTOR_CASCADES	150	0.182628	0.120786	0.243276	5.08157e-07	0.000155673	LY96, CASP8, CREB1, PTPN4, MAPKAPK2, IKBKE, DNM3, TLR5, TRAF2, DNM1, TANK, ATF2, TRAF6, LBP, UBE2V1, TLR2, S100A1, S100A8, S100A9, CTSK, CTSS, ALPK1, TIFA, UBE2D3, NFKB1, RIPK2, MAP3K7, TLR4, JUN, RPS6KA1, CD36, TNIP2, TLR1, TLR6, PTPN11, UBC, HMGB1, CUL1, GSDME, NOD1, RBSN, IRAK2, USP18, NFKBIB, VRK3, IRF3, MEF2A, MAPK3, ITGAM, SIGIRR, IRF7, FADD, MAP2K7, IKBKB, PPP2CB, DUSP4, TLR3, UBA52, N4BP1…
WP_PEPTIDE_GPCRS	32	0.55955	0.38475	0.730976	5.35916e-07	0.000155673	CXCR2, CXCR4, ACKR1, ATP8A1, TACR1, OXTR, C3AR1, C5AR1, NPY1R, EDNRA, MC1R, CCR4, CX3CR1, CCR9, CXCR6, CCR1, CCR2, CCR5, AVPR1A, TAC4, CCR7, CCR10, GALR2, TSHR, BDKRB2, BDKRB1, EDNRB, CCR6, FPR2, MC5R, AGTR2, CXCR3
REACTOME_CELLULAR_HEXOSE_TRANSPORT	13	0.219969	0.150911	0.289386	6.84251e-07	0.000155673	SLC45A3, SLC2A6, SLC2A8, SLC2A10, SLC50A1, SLC5A9, SLC2A1, SLC5A1, SLC2A9, SLC2A3, SLC2A12, SLC5A10, SLC2A4
PID_TOLL_ENDOGENOUS_PATHWAY	23	0.479419	0.346768	0.612755	7.31736e-07	0.000155673	LY96, HSPD1, TLR2, S100A8, S100A9, TLR4, TLR1, TLR6, HMGB1, IRAK2, IKBKB, TLR3, TIRAP, RHOA, MYD88, VCAN, IRAK4, TICAM1, CD14, CHUK, BGN, IRAK1, IKBKG
REACTOME_ACTIVATION_OF_IRF3_IRF7_MEDIATED_BY_TBK1_IKK_EPSILON	17	0.320183	0.222579	0.416841	7.45065e-07	0.000155673	LY96, IKBKE, TANK, TLR4, PTPN11, UBC, IRF3, IRF7, UBA52, TBK1, RPS27A, UBB, SARM1, TRAF3, TICAM1, CD14, TICAM2
WP_MITOCHONDRIAL_IMMUNE_RESPONSE_TO_SARSCOV2	27	0.180344	0.125681	0.235542	7.91891e-07	0.000155673	BCS1L, IKBKE, IFIH1, TRAF6, NDUFAF1, MAVS, ACAD9, NFKB1, PHB2, IRF3, IRF7, TLR3, ECSIT, NLRX1, CGAS, TBK1, ACE, TRAF3, CTSL, NDUFB9, TMPRSS2, TICAM1, STING1, NFKB2, AGTR2, ACE2, TLR7
REACTOME_OVARIAN_TUMOR_DOMAIN_PROTEASES	36	0.155743	0.109972	0.200631	8.60489e-07	0.000156146	VCPIP1, YOD1, IFIH1, TRAF6, MAVS, OTUD7B, RIPK2, VCP, OTUD3, TNIP2, UBC, NOD1, TNIP3, OTUD7A, ZRANB1, UBA52, NOD2, RHOA, ESR1, TNFAIP3, CDK1, UBE2D1, RPS27A, TNIP1, UBB, RNF135, TRIM25, OTUB2, TRAF3, RIPK1, APC, OTUB1, PTEN, OTUD5, IKBKG, RNF128
WP_NETWORK_MAP_OF_SARSCOV2_SIGNALING_PATHWAY	159	0.269591	0.183943	0.356079	1.10341e-06	0.000185925	IL17A, ZAP70, IL1R2, IL18RAP, STAT1, CASP8, FN1, CXCR2, CCL20, STEAP3, IL10, CFH, PTGS2, SELP, CD247, PRKCQ, TRAF2, GSN, IFIH1, ATG13, TRAF6, VPS18, IL1A, IL1B, VPS16, MAVS, ITCH, LBP, CEBPB, CTSZ, IL7, TNFSF10, FGF2, NTRK1, CD2, EIF4E, RPS6, JUN, JAK1, LCK, CASP9, MTOR, RHEB, ALB, CXCL5, PF4, CXCL1, CXCL2, CXCL9, CXCL10, CXCL13, ULK1, OAS2, VPS33A, SERPINE1, CARD11, ACTB, RAC1, CXCL12, BID, CD16…
REACTOME_TICAM1_DEPENDENT_ACTIVATION_OF_IRF3_IRF7	12	0.302	0.217447	0.384926	1.34352e-06	0.00021129	IKBKE, TANK, UBC, IRF3, IRF7, TLR3, UBA52, TBK1, RPS27A, UBB, TRAF3, TICAM1
KEGG_ALPHA_LINOLENIC_ACID_METABOLISM	13	0.169869	0.11503	0.224426	1.55316e-06	0.000228994	PLA2G4A, PLA2G4B, PLA2G4E, PLA2G12A, PLA2G2F, PLA2G2D, PLA2G5, PLA2G2E, ACOX3, PLA2G3, ACOX1, PLA2G6, FADS2
KEGG_RETINOL_METABOLISM	22	0.229528	0.153771	0.303824	1.72271e-06	0.000231146	RDH10, UGT1A1, DHRS9, LRAT, ADH7, ADH5, DHRS3, RETSAT, CYP26B1, DGAT2, BCO1, CYP1A1, ALDH1A2, RDH16, RDH5, RDH11, RDH12, DHRS4, DGAT1, ALDH1A1, CYP26A1, AWAT2
REACTOME_SARS_COV_INFECTIONS	369	0.116015	0.0791108	0.152561	1.76373e-06	0.000231146	IL17A, IL17F, MGAT4A, IL1R1, STAT1, SUMO1, CUL3, GPC1, ANO7, PDCD1, MGAT5, IKBKE, SNRPE, TPR, ATP1B1, ATP1A2, AKT3, MAN1B1, NUP188, NUP214, ST6GALNAC4, NMI, IFIH1, PPIG, NFE2L2, ITGA4, NUP35, ZDHHC5, NUP160, PHF21A, TRAF6, ANO3, VPS18, VPS39, B2M, SNRPB, VPS16, MAVS, FKBP1A, BCL2L1, CHMP4B, ITCH, EDEM2, RPN2, YWHAB, SDC4, UBE2V1, RAE1, ZBP1, RPS21, CHMP4C, TLR2, RPS27, GATAD2B, VPS45, ATP1A1, SIK…
REACTOME_IRAK4_DEFICIENCY_TLR2_4	15	0.75499	0.525218	0.98595	2.16953e-06	0.000269364	LY96, TLR2, S100A1, S100A8, S100A9, TLR4, CD36, TLR1, TLR6, HMGB1, TIRAP, MYD88, IRAK4, CD14, BTK
PID_ALPHA_SYNUCLEIN_PATHWAY	30	0.231685	0.151593	0.310233	2.68623e-06	0.000316841	TOR1A, PLCB2, FKBP1A, CSNK2A1, HCK, SRC, PLD1, LYN, LCK, FGR, PARK7, YES1, UCHL1, SNCA, KLK6, MAPK3, FYN, PLD2, SYK, PRKCD, BLK, PTK2B, MAPK1, UBE2L3, PRKN, STUB1, PPP2R5D, BAD, GRK5, MAOB
REACTOME_CHEMOKINE_RECEPTORS_BIND_CHEMOKINES	39	0.554954	0.35052	0.76139	2.91477e-06	0.000327426	CXCR2, CCL20, ACKR3, CXCR4, XCL1, CCL19, CXCL5, PF4, CXCL1, CXCL2, CXCL9, CXCL10, CXCL13, CXCL12, CCL25, CCL22, CX3CL1, CCL17, ACKR4, CCRL2, CCR4, CX3CR1, ACKR2, CCR9, CXCR6, XCR1, CCR1, CCR2, CCR5, CXCL16, CCL2, CCL7, CCL11, CCL3, CCR7, CCR10, CCL28, CCR6, CXCR3
REACTOME_TRAF6_MEDIATED_IRF7_ACTIVATION_IN_TLR7_8_OR_9_SIGNALING	13	0.346097	0.232216	0.460569	3.23266e-06	0.000346629	TRAF6, UBE2V1, UBC, IRF7, UBA52, TLR9, MYD88, UBE2N, RPS27A, UBB, IRAK4, IRAK1, TLR7
WP_RESOLVIN_E1_AND_RESOLVIN_D1_SIGNALING_PATHWAYS_PROMOTING_INFLAMMATION_RESOLUTION	10	0.744865	0.56713	0.920781	3.43078e-06	0.000351879	PDK1, PIK3CA, EPHB2, MTOR, PIK3CD, CMKLR1, PIK3CB, PIK3CG, AKT1, FPR2
REACTOME_TRANSCRIPTIONAL_REGULATION_OF_GRANULOPOIESIS	37	0.153422	0.0957479	0.21166	3.92297e-06	0.000385595	CREB1, RXRA, SPI1, E2F1, CEBPB, H2BC21, LEF1, H2AZ1, TAL1, CSF3R, GFI1, GATA2, H2AJ, CEBPA, TFDP1, CBFB, FLI1, H2AX, KMT2A, PML, TFDP2, MYB, CDK4, CDK2, H2AZ2, RARA, STAT3, H4C9, H4C8, H2BC6, H2BC4, DEK, KLF5, MYC, EP300, RUNX1, CDKN1A
WP_TLR4_SIGNALING_AND_TOLERANCE	25	0.220968	0.143671	0.297516	4.38889e-06	0.000409473	TRAM1, INPP5D, IKBKE, TRAF6, NFKB1, MAP3K7, TLR4, IRF3, IRF7, IKBKB, TIRAP, MYD88, TAB2, IRAK3, TBK1, NFKBIA, TRAF3, RIPK1, TAB1, IRAK4, TNF, TICAM1, CHUK, IRAK1, IKBKG
REACTOME_REGULATION_OF_TLR_BY_ENDOGENOUS_LIGAND	14	0.763959	0.514359	1.011	4.51306e-06	0.000409473	LY96, LBP, TLR2, S100A1, S100A8, S100A9, TLR4, CD36, TLR1, TLR6, HMGB1, GSDME, GSDMD, CD14
WP_SARSCOV2_INNATE_IMMUNITY_EVASION_AND_CELLSPECIFIC_IMMUNE_RESPONSE	51	0.439876	0.271335	0.610067	7.87136e-06	0.000687724	STAT1, CASP8, CXCR2, IL10, TRAF5, TRAF2, TANK, TRAF6, MAVS, RAE1, NFKB1, JAK1, CXCL5, PF4, CXCL1, CXCL2, CXCL9, CXCL10, CXCL13, CXCL12, LAG3, TGFB1, IRF3, NUP98, IFITM1, IRF7, FADD, TRADD, AP1G1, SMAD3, HDAC2, BSG, TBK1, STAT2, HAVCR2, LARP1, CCL2, CCL3, TRIM25, DHX58, TRAF3, RIPK1, TFAP2A, EP300, IFNAR2, IFNAR1, MX1, TNF, IFIT2, ACE2, TLR7
WP_OVERVIEW_OF_PROINFLAMMATORY_AND_PROFIBROTIC_MEDIATORS	54	0.489153	0.313086	0.663406	8.37024e-06	0.000688875	IL17A, IL17F, CCL20, IL10, XCL1, IL1F10, IL1RN, IL1A, IL1B, MMP9, IL7, CSF1, NFKB1, CCL19, CXCL5, PF4, CXCL1, CXCL2, AREG, CXCL9, CXCL10, CXCL13, SPP1, CCL24, CXCL12, IL11, TGFB1, CTF1, CCL25, TNFSF13B, IL15, CCL22, CX3CL1, CCL17, MMP3, IL18, OSM, LIF, IL4, TNFSF13, CXCL16, CCL2, CCL7, CCL11, CCL8, CCL3, CXCL14, CCL28, IL17D, TNF, VEGFA, EBI3, TSLP, IL33
REACTOME_SARS_COV_2_INFECTION	258	0.104979	0.0677459	0.141492	8.46857e-06	0.000688875	IL17A, IL17F, MGAT4A, STAT1, SUMO1, GPC1, ANO7, MGAT5, IKBKE, SNRPE, TPR, AKT3, MAN1B1, NUP188, NUP214, ST6GALNAC4, IFIH1, NUP35, ZDHHC5, NUP160, TRAF6, ANO3, VPS18, VPS39, B2M, SNRPB, VPS16, MAVS, CHMP4B, EDEM2, RPN2, YWHAB, SDC4, UBE2V1, RAE1, RPS21, CHMP4C, TLR2, RPS27, VPS45, SIKE1, DDX20, SEC24D, SEC24B, ST6GALNAC3, RPS20, RIPK2, MAP3K7, VCP, RPS6, PATJ, JAK1, NDC1, RPS8, ST3GAL3, SDC3, SFN,…
WP_MICROGLIA_PATHOGEN_PHAGOCYTOSIS_PATHWAY	37	0.495929	0.289142	0.703792	1.05725e-05	0.000831351	NCF2, FCER1G, VAV2, HCK, PIK3CA, VAV3, LYN, PIK3R3, C1QB, C1QC, C1QA, PIK3CD, NCF1, RAC1, ARPC1B, PTPN6, TYROBP, PIK3C2A, LAT, ITGAM, PIK3R2, PLCG2, CYBA, PIK3CB, ITGB2, PIK3R6, RAC3, PIK3CG, SYK, PIK3R1, NCF4, RAC2, NCKAP1L, TREM2, VAV1, PIK3C3, CYBB
REACTOME_RHO_GTPASES_ACTIVATE_NADPH_OXIDASES	21	0.534866	0.348045	0.722651	1.2747e-05	0.000970002	NCF2, S100A8, S100A9, PRKCZ, NCF1, RAC1, PRKCB, MAPK3, CYBA, PIN1, PIK3R4, PRKCA, PRKCD, NCF4, RAC2, MAPK11, MAPK1, NOXO1, MAPK14, PIK3C3, CYBB
WP_VITAMIN_D_RECEPTOR_PATHWAY	127	0.357938	0.223639	0.493552	1.3951e-05	0.00102845	IL1RL1, CTLA4, IGFBP5, DUSP10, TGFB2, LPGAT1, G0S2, PRKCQ, STAM, RXRA, LRRC8A, RASGRP1, THBD, ID1, CD40, NFATC2, FOXO1, S100A4, S100A6, S100A8, S100A9, SPRR1B, LCE1D, LCE1F, CCNC, KLF4, ORM1, CDKN2B, CDKN2C, STEAP4, SLC34A2, SPP1, EPHB4, HILPDA, IRF5, TRPV6, GADD45A, MXD1, GXYLT2, ALOX5, CD9, CRACR2A, CDKN1B, PTHLH, CEACAM1, TGFB1, CYP2S1, CEBPA, CCNE1, KLK6, ITGAM, CRACR2B, KRTAP5-1, KRTAP5-4, C…
REACTOME_ARACHIDONIC_ACID_METABOLISM	43	0.144451	0.0842505	0.205241	1.45513e-05	0.00104019	MAPKAPK2, PLA2G4A, PTGS2, PTGDS, PTGES, PTGES2, PTGS1, PTGIS, CYP2U1, PTGR1, CYP4B1, FAAH, PRXL2B, ALOX5AP, PON3, PON2, TBXAS1, HPGDS, ALOX5, HPGD, DPEP3, DPEP2, DPEP1, CYP1A1, GPX1, CYP8B1, GGT1, GGT5, GPX4, LTA4H, PTGES3, LTC4S, ALOXE3, ALOX12B, ALOX12, ALOX15, GPX2, PTGR2, EPHX2, ABCC1, CBR1, CYP1B1, AWAT1
REACTOME_ADAPTIVE_IMMUNE_SYSTEM	623	0.0858725	0.0478482	0.12427	1.53851e-05	0.00106314	UBE2W, ELOC, LY96, ACTR1B, ZAP70, TPP2, COL3A1, HECW2, CD28, CTLA4, ICOS, RNF25, TUBA4A, AP1S3, CUL3, TRIP12, PSMD1, INPP5D, UBE2F, ASB1, PDCD1, CTSE, PTPRC, NCF2, KLHL20, DNM3, KIFAP3, CD247, FCGR2B, SLAMF7, AKT3, ENAH, PPP2R5A, CD34, SEC61A2, PRKCQ, MRC1, TUBB4B, ANAPC2, NPDC1, FBXW5, UBAC1, ASB6, DNM1, LRSAM1, MAPKAP1, HSPA5, FBXW2, PSMD5, PSMB7, PSMD14, KLHL41, DYNC1I2, RAPGEF4, UBE2E3, ITGA4…
REACTOME_ZBP1_DAI_MEDIATED_INDUCTION_OF_TYPE_I_IFNS	20	0.146388	0.0877396	0.203906	1.61184e-05	0.00106314	DHX9, ZBP1, NFKB1, NFKBIB, IRF3, IKBKB, TLR3, MYD88, TBK1, NKIRAS2, NFKBIA, RIPK1, NKIRAS1, RIPK3, TICAM1, RELA, DTX4, CHUK, NFKB2, IKBKG
KEGG_VEGF_SIGNALING_PATHWAY	69	0.0943899	0.0532192	0.135964	1.62243e-05	0.00106314	MAPKAPK2, PLA2G4A, PTGS2, AKT3, CHP1, PLA2G4B, PLA2G4E, SRC, PLCG1, NFATC2, PIK3CA, SH2D2A, NRAS, PLA2G12A, PPP3CA, PIK3R3, CDC42, PLA2G2F, PLA2G2D, PLA2G5, PLA2G2E, CASP9, PIK3CD, NOS3, KDR, PXN, HSPB1, RAC1, RAF1, KRAS, PRKCG, AKT2, SPHK2, CHP2, PRKCB, MAPK3, HRAS, PIK3R2, NFATC3, NFAT5, PLCG2, MAP2K1, PIK3CB, MAPKAPK3, SHC2, MAP2K2, PLA2G3, PPP3R1, PIK3R5, PRKCA, SPHK1, RAC3, PIK3CG, AKT1, PIK…
REACTOME_INFECTIOUS_DISEASE	810	0.0894911	0.0496401	0.128572	1.82738e-05	0.00116508	TCEA1, ATP6V1H, RPL7, ELOC, IL17A, IL17F, MGAT4A, RPL31, IL1R1, STAT1, FZD7, SUMO1, ABI2, CD28, CREB1, XRCC5, RPL37A, ARPC2, TUBA4A, AP1S3, CUL3, PSMD1, GPC1, ANO7, PDCD1, VPS4B, ACTR3, MGAT5, CCNT2, CXCR4, IL10, IKBKE, SNRPE, TPR, ARPC5, ATP1B1, CD247, ATP1A2, AKT3, PARP1, NMT2, TAF3, STAM, MRC1, ABI1, NELFB, TUBB4B, MAN1B1, RPL7A, VAV2, NUP188, ABL1, NUP214, ST6GALNAC4, CDK9, RPL12, MVB12B, PSM…
REACTOME_AZATHIOPRINE_ADME	21	0.17386	0.103007	0.245407	2.01912e-05	0.00125345	VAV2, SLC28A2, GMPS, GSTM1, VAV3, RAC1, IMPDH1, GSTA1, GSTA2, IMPDH2, GUK1, NME2, NME1, TPMT, SLC28A3, ABCC4, ABCC5, SLC29A1, VAV1, XDH, SLC29A2
WP_ALLOGRAFT_REJECTION	47	0.380194	0.243529	0.517569	2.28157e-05	0.00138006	IL17A, STAT1, CASP8, CD28, CTLA4, PECR, CD55, IL10, IL2RA, VIM, COL5A1, IL1A, IL1B, CD40, CCL19, C1QB, C1QC, C1QA, CASP9, PRKCZ, PDGFRA, CXCL9, CXCL13, CXCL12, TGFB1, CASP3, CSNK2A2, PRF1, IL4, GZMB, C7, C9, GDNF, LRRK2, TUBA1B, CD86, CD80, GABPA, C4B, C4A, C2, TNF, VEGFA, C3, FAS, CASP7, FOXP3
REACTOME_INTERFERON_ALPHA_BETA_SIGNALING	48	0.483832	0.265796	0.697656	2.91903e-05	0.00170583	STAT1, RNASEL, IRF6, SAMHD1, PTPN1, ADAR, GBP2, JAK1, ISG15, OAS2, OAS3, PTPN11, IRF5, USP18, PTPN6, IRF3, ISG20, IFITM2, IFITM1, IFITM3, IRF7, IRF2, BST2, ABCE1, IRF8, TYK2, IP6K2, STAT2, IRF1, XAF1, KPNB1, IFI35, SOCS3, RSAD2, IFI27, IRF4, IRF9, SOCS1, KPNA1, IFNAR2, IFNAR1, MX1, MX2, PSMB8, EGR1, IFIT2, IFIT3, IFIT1
WP_EXTRAFOLLICULAR_AND_FOLLICULAR_B_CELL_ACTIVATION_BY_SARSCOV2	50	0.559119	0.339191	0.77678	2.96477e-05	0.00170583	ICOS, PDCD1, CXCR4, IL10, PTPRC, SLAMF7, ZEB2, CD82, CD40, FOXO1, FCRL5, BACH2, CCL19, TLR4, ISG15, CXCL13, TMSB10, CXCL12, CD69, MFGE8, ITGAX, IFITM1, TNFSF13B, MAF, IRF8, ETS1, HSPA8, PRDM1, BCR, ITGB2, XBP1, IL4, TNFSF13, CCR7, STAT5A, IRF4, SYK, GPR183, BCL6, CD80, BTLA, IFNAR2, C4A, TNF, EBI3, C3, NEAT1, IFIT2, BLNK, TLR7
WP_OXIDATIVE_DAMAGE_RESPONSE	35	0.230869	0.12915	0.333583	3.28333e-05	0.00181964	BCL2, TRAF2, TRAF1, TRAF6, PCNA, NFKB1, C1QB, C1QC, C1QA, CDC42, CASP9, TNFRSF1B, CYCS, GADD45A, C3AR1, CDKN1B, C5AR1, CDKN1C, BAG4, CASP3, APAF1, MAP2K4, MAP3K9, TRAF3, TDP2, MAP3K1, TNK2, BAK1, MAPK13, CDKN1A, C4B, C2, TNF, NFKBIE, BAD
WP_ULCERATIVE_COLITIS_SIGNALING	13	0.380469	0.225901	0.535839	3.31685e-05	0.00181964	IL10, GATA3, TLR2, NFKB1, TGFB1, NOD2, MAF, STAT6, IL4, TNF, NFATC1, FOXP3, IL2RG
REACTOME_SIGNALING_BY_THE_B_CELL_RECEPTOR_BCR	105	0.126868	0.0678492	0.186465	3.66004e-05	0.00192501	PSMD1, PSMD5, PSMB7, PSMD14, PSMC3, RASGRP1, FKBP1A, PSMF1, NFATC2, PSMA7, PSMB4, PSMD4, NRAS, AHCYL1, PSMA5, NFKB1, PPP3CA, DAPP1, BCL10, LYN, MAP3K7, PSMB2, PIK3CD, PSMC2, ORAI1, PSMD9, UBC, ORAI2, CARD11, SEM1, CUL1, ITPR1, PTPN6, KRAS, ITPR2, PSMC4, NFKBIB, PSMD8, STIM1, PSMA1, PRKCB, PSMD13, HRAS, IKBKB, UBA52, PSMB10, NFATC3, PSMD7, PLCG2, PSMA4, TRPC1, NCK1, FYN, PPIA, PPP3R1, REL, RPS27A,…
REACTOME_POTENTIAL_THERAPEUTICS_FOR_SARS	95	0.146825	0.0949295	0.199228	3.67212e-05	0.00192501	IL1R1, CUL3, PDCD1, ATP1B1, ATP1A2, NFE2L2, ITGA4, PHF21A, FKBP1A, ZBP1, GATAD2B, ATP1A1, S1PR1, SIGMAR1, JAK1, RBBP4, HDAC1, KDM1A, REST, SUDS3, IMPDH1, CRBN, FXYD4, CHD4, FKBP4, AP2S1, ATP1A3, FXYD7, FXYD1, FXYD3, AP2A1, FURIN, AP2A2, FNTA, SAP30, GATAD2A, JAK3, PLCG2, ITGB1, TYK2, KEAP1, FXYD6, FXYD2, ATP1B3, NCK1, TLR9, IMPDH2, IFNGR1, HDAC2, MBD3, HMG20B, TBK1, PTGES3, STAT2, SAP30L, CHD3, A…
REACTOME_CYTOKINE_SIGNALING_IN_IMMUNE_SYSTEM	581	0.136287	0.07254	0.199416	3.98048e-05	0.00204129	ELOC, IL17A, IL17F, PTPN18, IL1R2, IL1R1, IL1RL2, IL1RL1, IL18R1, IL18RAP, STAT1, CASP8, SUMO1, CREB1, FN1, IRS1, CCL20, SP100, PSMD1, EIF4E2, INPP5D, TNFRSF11A, BCL2, SERPINB2, PTPN4, IL10, MAPKAPK2, PTPN7, PTGS2, TPR, RNASEL, ABL2, TNFSF18, POU2F1, AKT3, PTPN14, IRF6, GATA3, IL2RA, IL15RA, VIM, IL1F10, IL1RN, TRAF2, RAPGEF1, NUP188, NUP214, LCN2, PSMD5, PSMB7, PSMD14, ATF2, NUP35, UBE2L6, PTPRJ…
PID_CXCR3_PATHWAY	42	0.241329	0.141016	0.340611	4.12553e-05	0.00207067	DNM1, MAPKAP1, SRC, PIK3CA, NRAS, GNAI3, PIK3R3, MTOR, PIK3CD, GNB1, GNAI1, PF4, CXCL9, CXCL10, CXCL13, RAF1, KRAS, ARRB1, MAPK3, ITGAL, HRAS, PIK3R2, GNAO1, MAP2K1, PIK3CB, GNAI2, GNAZ, ITGB2, MAP2K2, MAP2K3, CCL11, MAP2K6, AKT1, PIK3R1, GNG2, RICTOR, MAPK11, MAPK1, PDPK1, MLST8, MAPK14, CXCR3
REACTOME_NEGATIVE_REGULATORS_OF_DDX58_IFIH1_SIGNALING	31	0.156141	0.0914517	0.221462	4.34495e-05	0.00213536	IKBKE, IFIH1, UBE2L6, MAVS, ITCH, UBE2D3, ISG15, UBE2K, UBC, RNF216, TAX1BP1, IRF3, UBA52, CYLD, NLRC5, PIN1, NLRX1, UBA7, TNFAIP3, ATG5, UBE2D1, TBK1, RPS27A, UBB, RNF135, TRIM25, TRAF3, PCBP2, RNF125, ATG12, OTUD5
REACTOME_INITIAL_TRIGGERING_OF_COMPLEMENT	13	0.400148	0.223833	0.577379	5.17743e-05	0.0024511	C1QB, C1QC, C1QA, GZMM, CFD, COLEC11, MASP1, C4B, C4A, CFB, C2, C3, CFP
WP_2Q13_COPY_NUMBER_VARIATION_SYNDROME	44	0.163541	0.0941655	0.23158	5.28017e-05	0.0024511	IL1R1, IL1RL2, STAT1, GATA3, IL1F10, IL1RN, PSD4, ACOXL, BCL2L11, ANAPC1, MERTK, TMEM87B, FBLN7, ZC3H8, ZC3H6, TTL, POLR1B, CHCHD5, SLC20A1, CKAP2L, IL1A, IL1B, CSF1, POLR1E, CXCL13, RAC1, POLR1D, POLR1A, POLR2L, GAS6, PLCG2, POLR2E, GRB2, SOCS3, ARF6, LGALS3, POLR2K, PTK2, POLR2F, SOCS1, MAPK1, POLR2H, IL1RAP, POLR1C
REACTOME_NICOTINAMIDE_SALVAGING	18	0.167828	0.0957442	0.239171	5.29911e-05	0.0024511	PTGS2, PTGIS, NAXE, NAXD, NNMT, PARP6, PARP16, CYP8B1, SLC5A8, NAMPT, PARP8, PARP4, NAPRT, PARP10, PARP14, PARP9, NUDT12, RNLS
REACTOME_CYTOSOLIC_SENSORS_OF_PATHOGEN_ASSOCIATED_DNA	60	0.101031	0.0531514	0.147985	5.9364e-05	0.00268637	XRCC5, LRRFIP1, DHX9, AIM2, POLR3F, ZBP1, POLR3K, DHX36, POLR3GL, POLR3C, NFKB1, TRIM32, UBC, CRCP, TRIM56, POLR1D, NFKBIB, IRF3, TRIM21, POLR3E, IRF7, POLR2L, IKBKB, TLR3, UBA52, CGAS, MYD88, CTNNB1, POLR2E, POLR3B, TBK1, STAT6, RPS27A, UBB, NKIRAS2, NFKBIA, RIPK1, DDX41, POLR3G, NKIRAS1, POLR3A, RIPK3, POLR3D, POLR2K, POLR2F, EP300, POLR3H, XRCC6, NLRC3, CREBBP, PRKDC, POLR2H, POLR1C, TICAM1, S…
REACTOME_INTERLEUKIN_12_FAMILY_SIGNALING	47	0.145384	0.0779638	0.213465	6.0355e-05	0.00268637	STAT1, SERPINB2, IL10, CAPZA1, MTAP, JAK1, CDC42, HNRNPDL, RPLP0, HNRNPA2B1, IL12RB2, HNRNPF, SNRPA1, BOLA2, TALDO1, CRLF1, IL12RB1, IL27RA, TYK2, ANXA2, GSTA2, MIF, CNN2, RAP1B, PPIA, CANX, ARF1, PITPNA, STAT3, P4HB, RALA, IL6ST, PSME2, LCP1, PAK2, SOD1, TCP1, SOD2, EBI3, HSPA9, LMNB1, AIP, CFL1, JAK2, GSTO1, PDCD4, MSN
KEGG_CHEMOKINE_SIGNALING_PATHWAY	153	0.187433	0.0986514	0.275352	6.23886e-05	0.00272546	STAT1, CXCR2, CCL20, CXCR4, XCL1, AKT3, VAV2, PLCB2, SHC4, PLCB1, PLCB4, HCK, PREX1, PIK3CA, GNB4, SHC1, NRAS, RAP1A, GNAI3, VAV3, NFKB1, GNG5, PRKACB, LYN, CCL19, GNG10, PIK3R3, FGR, CDC42, PIK3CD, PRKCZ, GNB1, GNAI1, GRK4, CXCL5, PF4, CXCL1, CXCL2, CXCL9, CXCL10, CXCL13, GRK3, PXN, NCF1, CCL24, GNB2, RAC1, GNG11, WASL, BRAF, GNG12, RAF1, CXCL12, KRAS, GNG8, GSK3A, AKT2, NFKBIB, PAK1, ARRB1, PRK…
REACTOME_SIGNALING_BY_INTERLEUKINS	390	0.126567	0.0661304	0.185836	6.78315e-05	0.00290935	IL17A, IL17F, PTPN18, IL1R2, IL1R1, IL1RL2, IL1RL1, IL18R1, IL18RAP, STAT1, CASP8, CREB1, FN1, IRS1, CCL20, PSMD1, INPP5D, BCL2, SERPINB2, PTPN4, IL10, MAPKAPK2, PTPN7, PTGS2, POU2F1, PTPN14, GATA3, IL2RA, IL15RA, VIM, IL1F10, IL1RN, TRAF2, RAPGEF1, LCN2, PSMD5, PSMB7, PSMD14, ATF2, PSMC3, TRAF6, IL1A, IL1B, PSMF1, BCL2L1, HCK, LBP, MMP9, UBE2V1, PSMA7, LAMA5, IL7, PIK3CA, SOX2, FGF2, FOXO1, MUC1…
REACTOME_SARS_COV_2_HOST_INTERACTIONS	169	0.149361	0.0870212	0.21231	7.46769e-05	0.00314576	IL17A, IL17F, STAT1, IKBKE, SNRPE, TPR, AKT3, NUP188, NUP214, IFIH1, NUP35, NUP160, TRAF6, VPS18, VPS39, B2M, SNRPB, VPS16, MAVS, YWHAB, UBE2V1, RAE1, RPS21, TLR2, RPS27, VPS45, SIKE1, DDX20, SEC24D, SEC24B, RPS20, RIPK2, MAP3K7, RPS6, PATJ, JAK1, NDC1, RPS8, SFN, ISG15, YWHAH, TLR1, G3BP2, NUP54, PTPN11, VPS33A, UBC, POM121, YWHAG, CAV1, NUP205, NOD1, SNRPG, CNBP, NUP210, IL17RC, IRAK2, SEC13, I…
REACTOME_INACTIVATION_OF_CSF3_G_CSF_SIGNALING	23	0.186186	0.100707	0.272502	7.79233e-05	0.00317941	ELOC, STAT1, HCK, UBE2D3, LYN, JAK1, CSF3R, UBC, UBA52, TYK2, CUL5, RNF7, UBE2D1, RPS27A, UBB, STAT5B, STAT5A, STAT3, SOCS3, SYK, SOCS1, ELOB, JAK2
REACTOME_NEF_MEDIATES_DOWN_MODULATION_OF_CELL_SURFACE_RECEPTORS_BY_RECRUITING_THEM_TO_CLATHRIN_ADAPTERS	19	0.162543	0.0895751	0.236224	7.86235e-05	0.00317941	ATP6V1H, CD28, AP1S3, B2M, LCK, AP1S1, CD4, AP2S1, AP2A1, AP2A2, AP1M1, AP1G1, AP1M2, AP1B1, ARF1, AP2B1, AP2M1, PACS1, AP1S2
REACTOME_RIP_MEDIATED_NFKB_ACTIVATION_VIA_ZBP1	17	0.156688	0.086688	0.226327	8.00241e-05	0.00317941	DHX9, ZBP1, NFKB1, NFKBIB, IKBKB, TLR3, MYD88, NKIRAS2, NFKBIA, RIPK1, NKIRAS1, RIPK3, TICAM1, RELA, CHUK, NFKB2, IKBKG
KEGG_PORPHYRIN_AND_CHLOROPHYLL_METABOLISM	22	0.165393	0.10112	0.228429	8.08667e-05	0.00317941	UGT1A1, PPOX, BLVRA, CP, ALAD, UROD, MMAB, GUSB, BLVRB, EARS2, UROS, HMOX1, HMBS, ALAS1, COX10, HMOX2, CPOX, FECH, FTH1, COX15, ALAS2, HCCS
WP_HOSTPATHOGEN_INTERACTION_OF_HUMAN_CORONAVIRUSES_MAPK_SIGNALING	35	0.105081	0.0567401	0.153674	8.28507e-05	0.00320401	BCL2, ATF2, EIF4E, JUN, RPS6KA1, RAF1, MAP3K10, MAPK3, IFITM2, IFITM1, IFITM3, MAP2K7, BST2, JUNB, MAP2K1, MAP2K2, DDIT3, MAPK9, MAP2K3, MAP2K4, MAP2K6, MAP3K9, FOS, IFI27, MAP3K1, MAPK8, MAPK12, MAPK11, MAPK1, RPS6KA2, MAP3K4, MAPK14, MAPK13, MAP3K11, RPS6KA3
WP_ARYL_HYDROCARBON_RECEPTOR_PATHWAY_WP2873	33	0.136481	0.0722428	0.201348	8.76579e-05	0.00333524	UGT1A1, SERPINB2, NFE2L2, IL1B, SRC, ARNT, JUN, CDKN1B, MGST1, TGFB1, BAX, JUND, JUNB, NQO1, SLC7A5, CDC37, CYP1A1, GSTA2, PTGES3, EGFR, ALDH3A1, NCOA1, AHR, HSP90AA1, CAP2, AHRR, POLK, EP300, HES1, TNF, CYP1B1, AIP, MYOF
REACTOME_SARS_COV_1_ACTIVATES_MODULATES_INNATE_IMMUNE_RESPONSES	37	0.142132	0.0763461	0.208561	9.19195e-05	0.00344187	IKBKE, NMI, IFIH1, PPIG, TRAF6, MAVS, FKBP1A, ITCH, SIKE1, NFKB1, PPIH, RCAN3, UBC, IRAK2, IRF3, PYCARD, UBA52, BST2, CASP1, PPIB, TBK1, PPIA, RPS27A, NLRP3, UBB, TRIM25, KPNB1, KPNA2, NFKBIA, TRAF3, RIPK3, PCBP2, RUNX1, STING1, RELA, TKFC, TLR7
BIOCARTA_MONOCYTE_PATHWAY	10	0.407284	0.219223	0.593409	9.48681e-05	0.00347884	SELE, SELP, ITGA4, CD44, ITGAL, ITGAM, ITGB1, ICAM1, ITGB2, PECAM1
WP_EBOLA_VIRUS_INFECTION_IN_HOST	98	0.0791215	0.0398865	0.117598	9.58561e-05	0.00347884	STAT1, IKBKE, VAV2, GSN, DAB2IP, ITGA6, PRKRA, ITGA4, ITGAV, VPS18, TYRO3, VPS39, MERTK, VPS16, TOP1, PIK3CA, RHOC, NFKB1, CLTA, TLR4, EPS15, PIK3R3, CDC42, PIK3CD, RFC1, VPS33A, ACTB, RAC1, CAV2, CAV1, FLNC, CAV3, RELB, AXL, ACTN4, IRF3, TSG101, IGF1R, MFGE8, IQGAP1, PAK1, FOLR1, MAPK3, IRF7, TPCN2, GAS6, PIK3R2, BST2, VPS4A, ITGB1, VPS11, NEDD4, RASA2, PIK3CB, RHOA, TBK1, EGFR, REL, HAVCR2, TIM…
REACTOME_GLUTAMATE_NEUROTRANSMITTER_RELEASE_CYCLE	16	-0.134917	0.197326	0.0737109	0.000113852	0.00403083	GLS, PPFIA4, STXBP1, SLC1A2, UNC13B, STX1A, ARL6IP5, PPFIA3, PPFIA1, RAB3A, GLS2, VAMP2, TSPOAP1, SLC1A3, SLC38A2, SLC1A1
REACTOME_SIGNALING_BY_CSF3_G_CSF	28	0.157724	0.0817907	0.232192	0.000116046	0.00403083	ELOC, STAT1, HCK, SHC1, UBE2D3, LYN, JAK1, CSF3R, PTPN11, UBC, KRAS, GAB2, UBA52, TYK2, CUL5, RNF7, UBE2D1, RPS27A, UBB, STAT5B, STAT5A, STAT3, GRB2, SOCS3, SYK, SOCS1, ELOB, JAK2
REACTOME_DDX58_IFIH1_MEDIATED_INDUCTION_OF_INTERFERON_ALPHA_BETA	60	0.121509	0.0622674	0.179608	0.000119069	0.00403083	CASP8, IKBKE, TRAF2, TANK, IFIH1, UBE2L6, TRAF6, MAVS, ITCH, SIKE1, UBE2D3, NFKB1, ISG15, UBE2K, UBC, RNF216, HMGB1, TAX1BP1, NFKBIB, IRF3, IRF7, FADD, IKBKB, UBA52, CYLD, NLRC5, PIN1, NLRX1, UBA7, TNFAIP3, ATG5, UBE2D1, S100B, TBK1, RPS27A, UBB, RNF135, TRIM25, NKIRAS2, DHX58, NFKBIA, HSP90AA1, TRAF3, RIPK1, MAP3K1, NKIRAS1, EP300, PCBP2, CREBBP, APP, AGER, HSP90AB1, RNF125, ATG12, RELA, TKFC, C…
WP_PROSTAGLANDIN_SIGNALING	28	0.543286	0.311557	0.770549	0.000119228	0.00403083	IL17A, IL17F, CD28, PTGES, IL1A, IL1B, MMP9, CSF1, NFKB1, CXCL1, AREG, CXCL9, CXCL10, KLRD1, TGFB1, PYCARD, IRF7, CASP1, CCR2, NLRP3, CCL2, CCL3, PIK3CG, AHR, PTGER2, PTGER4, TNF, VEGFA
KEGG_STEROID_HORMONE_BIOSYNTHESIS	14	0.283648	0.146942	0.418946	0.000121064	0.00403083	UGT1A1, HSD17B7, HSD11B1, HSD17B12, CYP7B1, SRD5A3, SULT2B1, HSD17B2, CYP1A1, CYP11A1, SRD5A1, COMT, CYP1B1, CYP17A1
WP_NONGENOMIC_ACTIONS_OF_125_DIHYDROXYVITAMIN_D3	63	0.14942	0.0794475	0.220076	0.000121318	0.00403083	STAT1, RXRG, PRKCQ, RXRA, SP3, PLCB2, PLCB1, PLCB4, CD40, TLR2, NRAS, CAMK2D, NFKB1, TLR4, JUN, JAK1, PRKCZ, ISG15, OAS2, CAV1, TNFRSF1A, KRAS, PRKCG, RELB, PRKCB, MAPK3, HRAS, IKBKB, NOD2, PLCG2, TYK2, ETS1, PLCD1, IFNGR1, STAT2, CAMK2B, MAPK9, MAPK7, CCL2, MED1, PRKCA, RSAD2, PRKCH, CAMK2G, PRKCD, MAPK8, MAPK12, MAPK11, VDR, SP1, MAPK1, IFNAR2, IFNGR2, MAPK14, MAPK13, RXRB, TNF, PRKCE, CAMK2A, …
BIOCARTA_GRANULOCYTES_PATHWAY	10	0.486826	0.26724	0.704153	0.000123185	0.00403603	SELP, IL1A, SELPLG, ITGAL, ITGAM, ICAM1, ITGB2, ICAM2, PECAM1, TNF
REACTOME_HYALURONAN_UPTAKE_AND_DEGRADATION	10	0.194492	0.102028	0.286341	0.000144081	0.004656	CD44, CHP1, SLC9A1, GUSB, LYVE1, HEXA, HYAL2, HYAL1, HMMR, HEXB
REACTOME_G_ALPHA_I_SIGNALLING_EVENTS	185	0.117405	0.0577569	0.177638	0.000153819	0.00490351	RGS20, NPBWR1, CREB1, CXCR2, CCL20, GPR55, ACKR3, CXCR4, ADORA1, GPR37L1, RGS1, RGS18, PLA2G4A, RGS8, RGS16, RGS5, RGS4, OPN3, GPSM1, PDE1A, APLNR, CHRM4, PLCB2, PLCB1, PLCB4, SRC, GNAS, RGS19, GNB4, NBEA, P2RY14, P2RY13, P2RY12, SUCNR1, ADORA3, AHCYL1, GNAI3, GPSM2, CAMK2D, PPP3CA, LPAR3, GNG5, PRKACB, PTGER3, PENK, CNR1, CCL19, LPAR1, GNG10, RGS3, PDE4B, CNR2, HTR1D, GNB1, TAS1R3, GNAI1, CDK5, …
REACTOME_GPVI_MEDIATED_ACTIVATION_CASCADE	33	0.211395	0.104889	0.318456	0.000159545	0.00501823	FCER1G, VAV2, PIK3CA, VAV3, LYN, PIK3R3, LCK, CDC42, PDPN, PRKCZ, PTPN11, RAC1, COL1A2, PTPN6, RHOG, LAT, PIK3R2, PLCG2, PIK3CB, RHOA, FYN, LCP2, PIK3R5, PIK3R6, COL1A1, RHOB, PIK3CG, SYK, PIK3R1, RAC2, PDPK1, MPIG6B, VAV1
REACTOME_INTERFERON_SIGNALING	147	0.198155	0.0965285	0.300778	0.000170687	0.00529803	STAT1, SUMO1, SP100, EIF4E2, TPR, RNASEL, IRF6, NUP188, NUP214, NUP35, UBE2L6, NUP160, CD44, B2M, SAMHD1, PLCG1, PTPN1, RAE1, KPNA4, TRIM2, TRIM46, ADAR, TRIM45, VCAM1, CAMK2D, EIF4E, GBP5, GBP7, GBP3, GBP2, TRIM14, JAK1, NDC1, TRIM62, PTAFR, EIF4G3, ISG15, NUP54, GBP4, GBP6, OAS2, OAS3, PTPN11, UBC, POM121, IRF5, NUP205, NUP210, EIF4E3, SEC13, USP18, PTPN6, NUP62, IRF3, ISG20, NUP98, TRIM21, TRI…
REACTOME_ANTIGEN_ACTIVATES_B_CELL_RECEPTOR_BCR_LEADING_TO_GENERATION_OF_SECOND_MESSENGERS	28	0.27705	0.138818	0.412616	0.000177954	0.00545188	AHCYL1, DAPP1, LYN, PIK3CD, ORAI1, ORAI2, ITPR1, PTPN6, ITPR2, STIM1, PLCG2, TRPC1, NCK1, FYN, CD79B, GRB2, CALM1, IGHM, SYK, PIK3R1, BLK, ITPR3, VAV1, SOS1, BLNK, PIK3AP1, BTK, SH3KBP1
WP_IMMUNE_INFILTRATION_IN_PANCREATIC_CANCER	24	0.53597	0.322841	0.746909	0.000183394	0.00554648	IL17A, IL17F, CCL20, IL10, TGFB2, IL1B, MMP9, CXCL5, CXCL1, CXCL12, TGFB1, VEGFC, IL4, LGALS9, CCL2, TGFB3, CCL28, LGALS3, IL17D, LGALS1, TNF, VEGFA, VEGFB, VEGFD
PID_IL8_CXCR2_PATHWAY	32	0.244014	0.121681	0.363987	0.000187708	0.00560511	CXCR2, DNM1, PLCB2, PLCB1, HCK, LYN, FGR, GNB1, PRKCG, VASP, ARRB1, PRKCB, CBL, RAB11A, GNAI2, GNA15, DOCK2, PPP2CA, PIK3R6, ARRB2, PLD2, PRKCA, PIK3CG, AKT1, ELMO1, GNG2, RAC2, PPP2R1A, PDPK1, RAB5A, PLCB3, GNA14
REACTOME_ROS_AND_RNS_PRODUCTION_IN_PHAGOCYTES	32	0.255067	0.145832	0.362197	0.000191621	0.00565043	ATP6V1H, SLC11A1, NCF2, ATP6V0D2, ATP6V1G1, ATP6V0B, NOS3, NOS1, HVCN1, ATP6V0A2, NCF1, ATP6V1F, ATP6V0A4, ATP6V0E2, ATP6V1B1, ATP6V1E1, ATP6V1B2, ATP6V0D1, CYBA, NOS2, LPO, ATP6V0A1, ATP6V1C2, ATP6V1D, ATP6V1C1, NCF4, RAC2, ATP6V1A, ATP6V0C, ATP6V1G2, TCIRG1, CYBB
KEGG_LEISHMANIA_INFECTION	49	0.203516	0.100179	0.306318	0.000197487	0.00568704	STAT1, IL10, PTGS2, NCF2, TGFB2, ITGA4, TRAF6, IL1A, IL1B, TLR2, NFKB1, MAP3K7, TLR4, JUN, JAK1, MARCKSL1, NCF1, PTPN6, TGFB1, NFKBIB, PRKCB, MAPK3, ITGAM, CYBA, ITGB1, MYD88, TAB2, IFNGR1, ITGB2, IL4, NOS2, NFKBIA, FOS, TGFB3, NCF4, TAB1, MAPK12, MAPK11, IRAK4, MAPK1, IFNGR2, MAPK14, MAPK13, TNF, C3, RELA, JAK2, ELK1, IRAK1
REACTOME_SARS_COV_2_ACTIVATES_MODULATES_INNATE_AND_ADAPTIVE_IMMUNE_RESPONSES	96	0.19684	0.109883	0.282121	0.000197684	0.00568704	IL17A, IL17F, STAT1, IKBKE, TPR, NUP188, NUP214, IFIH1, NUP35, NUP160, TRAF6, B2M, MAVS, UBE2V1, RAE1, TLR2, SIKE1, SEC24D, SEC24B, RIPK2, MAP3K7, JAK1, NDC1, ISG15, TLR1, G3BP2, NUP54, PTPN11, UBC, POM121, NUP205, NOD1, CNBP, NUP210, IL17RC, IRAK2, SEC13, IL17RA, PTPN6, NUP62, IRF3, NUP98, IRF7, IKBKB, UBA52, NOD2, NUP93, NUP133, TYK2, PIK3R4, NUP43, TAB2, RANBP2, NUP37, UBE2N, NUP107, TBK1, STA…
REACTOME_CROSSLINKING_OF_COLLAGEN_FIBRILS	18	-0.24069	0.361473	0.121151	0.000212398	0.00603671	COL4A4, COL4A3, PCOLCE, COL1A2, LOXL3, COL4A1, COL4A2, TLL1, LOXL1, COL1A1, PXDN, LOXL2, BMP1, LOX, TLL2, LOXL4, COL4A6, COL4A5
REACTOME_DAP12_INTERACTIONS	30	0.35655	0.199117	0.51096	0.000217924	0.00612003	VAV2, B2M, PLCG1, PIK3CA, SHC1, NRAS, VAV3, LCK, RAC1, CLEC5A, KLRD1, KLRK1, KRAS, TYROBP, LAT, HRAS, PIK3R2, PLCG2, PIK3CB, FYN, LCP2, CD300LB, CD300E, GRB2, SYK, PIK3R1, GRAP2, TREM2, SOS1, BTK
REACTOME_SLC_MEDIATED_TRANSMEMBRANE_TRANSPORT	180	0.0903524	0.0437696	0.136035	0.000224226	0.00622293	SLC9A4, SLC9A2, SLC40A1, SLC39A10, SLC11A1, SLC4A3, SLCO4C1, SLC26A9, SLC41A1, SLC45A3, SLC30A1, SLC2A6, SLC27A4, SLC2A8, SLC43A1, SLC35C1, SLC1A2, SLC12A6, SLC28A2, SLC24A5, SLC20A1, SLC24A3, SLC12A5, SLC13A3, SLC2A10, SLC9A8, SLCO4A1, CP, SLC7A11, SLC33A1, RHBG, SLC50A1, SLC39A1, SLC22A15, SLC16A1, SLC35A3, SLC44A3, SLC39A8, SLC26A7, SLC35A1, SLC44A1, SLC31A1, SLC24A2, SLC35D1, SLC5A9, SLC6A9, …
NABA_SECRETED_FACTORS	198	0.158411	0.0757311	0.239493	0.000229438	0.00629354	IL17A, IL17F, MSTN, WNT6, WNT10A, INHA, CCL20, INHBB, IL10, ANGPTL1, TNFSF18, XCL1, LEFTY1, TGFB2, IL1F10, IL1RN, EGFL7, ANGPTL2, FRZB, MDK, BDNF, FGF7, IL1A, IL1B, BMP2, ISM1, ANGPT4, GDF5, BMP7, IL7, TNFSF10, FGF2, PDGFC, SFRP2, S100A1, S100A13, S100A14, S100A16, S100A3, S100A4, S100A6, S100A7A, S100A8, S100A9, CRNN, FLG2, FLG, HRNR, RPTN, TCHH, TCHHL1, S100A11, S100A10, NGF, WNT2B, CSF1, EGF, …
WP_CHEMOKINE_SIGNALING_PATHWAY	144	0.170172	0.0810088	0.257613	0.000232262	0.00629776	STAT1, CXCR2, CCL20, CXCR4, XCL1, AKT3, VAV2, PLCB2, SHC4, PLCB1, PLCB4, HCK, PREX1, PIK3CA, GNB4, SHC1, NRAS, RAP1A, GNAI3, VAV3, NFKB1, GNG5, PRKACB, LYN, CCL19, GNG10, PIK3R3, FGR, CDC42, PIK3CD, PRKCZ, GNB1, GNAI1, GRK4, CXCL5, PF4, CXCL9, CXCL10, CXCL13, PXN, NCF1, CCL24, GNB2, RAC1, GNG11, WASL, BRAF, GNG12, RAF1, CXCL12, KRAS, GNG8, AKT2, NFKBIB, PAK1, ARRB1, PRKCB, MAPK3, HRAS, CCL25, IKB…
WP_VITAMIN_DSENSITIVE_CALCIUM_SIGNALING_IN_DEPRESSION	26	-0.143912	0.213142	0.0753949	0.000239188	0.00641186	CYP27A1, BCL2, ATP2B4, RXRA, NFE2L2, KCNQ2, KDM1A, KDM3A, ITPR1, ATP2B2, CACNA1C, ITPR2, GRIN2D, TPH1, GSR, GCLC, GGT1, ATP2B1, KDM6B, KDM1B, KCNQ3, PVALB, VDR, ITPR3, SLC8A1, CHRM1
REACTOME_EARLY_PHASE_OF_HIV_LIFE_CYCLE	14	0.212213	0.11922	0.303416	0.000243965	0.00646645	XRCC5, CXCR4, PSIP1, CD4, LIG1, LIG4, CCR5, PPIA, XRCC4, XRCC6, KPNA1, HMGA1, BANF1, FEN1
REACTOME_INTERLEUKIN_10_SIGNALING	34	0.455431	0.225361	0.681065	0.00024855	0.00651477	IL1R2, IL1R1, CCL20, IL10, PTGS2, IL1RN, IL1A, IL1B, CSF1, CCL19, JAK1, PTAFR, TNFRSF1B, CXCL1, CXCL2, CXCL10, TNFRSF1A, CCL22, ICAM1, TYK2, IL10RA, IL18, CCR1, CCR2, CCR5, LIF, CCL2, CCL3, STAT3, CD86, CD80, IL10RB, TNF, TIMP1
WP_FIBRIN_COMPLEMENT_RECEPTOR_3_SIGNALING_PATHWAY	35	0.22477	0.116602	0.3335	0.000264926	0.00678536	LY96, RASSF5, TRAF6, SRC, LBP, PIK3CA, NFKB1, TLR4, CXCL10, IRAK2, TYROBP, IRF3, ITGAM, IKBKB, PLAT, TLR3, TIRAP, RHOA, MYD88, ITGB2, REL, NOS2, CCL2, AKT1, SYK, IRAK4, CBLB, TNF, TICAM1, CD14, TICAM2, RELA, CHUK, IRAK1, IKBKG
PID_UPA_UPAR_PATHWAY	32	0.235696	0.119702	0.349454	0.000266573	0.00678536	FN1, NCL, ITGAV, SRC, MMP9, HGF, SERPINE1, RAC1, PLAUR, TGFB1, ITGAM, DOCK1, BCAR1, ITGB1, PDGFD, MMP12, MMP3, ITGB2, LRP1, EGFR, CRK, VTN, ITGA3, ITGB3, GPLD1, PLAU, CTSG, ITGA5, ITGB5, FPR2, PDGFRB, VLDLR
WP_TYPE_I_INTERFERON_INDUCTION_AND_SIGNALING_DURING_SARSCOV2_INFECTION	28	0.391232	0.191244	0.587364	0.000268001	0.00678536	STAT1, IKBKE, IFIH1, TRAF6, MAVS, TLR2, TLR4, JAK1, TLR6, OAS2, OAS3, IRF3, IRF7, TLR3, TYK2, TLR9, MYD88, TBK1, STAT2, TRAF3, IRF9, IRAK4, IFNAR2, IFNAR1, TMPRSS2, EIF2AK2, ACE2, TLR7
KEGG_CYTOKINE_CYTOKINE_RECEPTOR_INTERACTION	170	0.220643	0.104971	0.334081	0.000272449	0.00678536	IL17A, IL1R2, IL1R1, IL18R1, IL18RAP, BMPR2, CXCR2, CCL20, TNFRSF11A, INHBB, CXCR4, IL10, TNFSF18, XCL1, TGFB2, IL2RA, IL15RA, ACVR2A, ACVR1, IL1A, IL1B, BMP2, GDF5, CD40, BMP7, IL7, TNFSF10, PDGFC, CSF1, EGF, BMPR1B, CNTFR, CCL19, TGFBR1, TNFSF15, TNFSF8, LEPR, CSF3R, IFNLR1, IL22RA1, TNFRSF1B, TNFRSF8, TNFRSF9, TNFRSF25, TNFRSF14, TNFRSF4, TNFRSF18, HGF, PDGFRA, KIT, KDR, CXCL5, PF4, CXCL1, CXC…
REACTOME_SYNTHESIS_OF_PROSTAGLANDINS_PG_AND_THROMBOXANES_TX	14	0.167927	0.0852986	0.248965	0.000274185	0.00678536	PTGS2, PTGDS, PTGES, PTGES2, PTGS1, PTGIS, PRXL2B, TBXAS1, HPGDS, HPGD, CYP8B1, PTGES3, PTGR2, CBR1
REACTOME_INTERLEUKIN_35_SIGNALLING	10	0.243068	0.123448	0.360385	0.000276774	0.00678536	STAT1, JAK1, IL12RB2, IL27RA, TYK2, CANX, STAT3, IL6ST, EBI3, JAK2
REACTOME_MYD88_INDEPENDENT_TLR4_CASCADE	102	0.0740481	0.0345667	0.112766	0.000279008	0.00678536	LY96, CASP8, CREB1, MAPKAPK2, IKBKE, TRAF2, TANK, ATF2, TRAF6, UBE2V1, ALPK1, TIFA, UBE2D3, NFKB1, RIPK2, MAP3K7, TLR4, JUN, RPS6KA1, TNIP2, PTPN11, UBC, HMGB1, CUL1, NOD1, IRAK2, USP18, NFKBIB, VRK3, IRF3, MEF2A, MAPK3, IRF7, FADD, MAP2K7, IKBKB, PPP2CB, DUSP4, UBA52, N4BP1, NOD2, NLRC5, BIRC2, BIRC3, NLRX1, PPP2R1B, MAP2K1, DUSP7, MAPKAPK3, TAB2, UBE2D1, S100B, IKBIP, UBE2N, DUSP6, TBK1, RPS27A…
WP_INFLAMMATORY_BOWEL_DISEASE_SIGNALING	29	0.316072	0.153365	0.480372	0.000308233	0.00738373	IL17F, IL18RAP, STAT1, IL10, TLR5, GATA3, IL1A, TLR2, RORC, NFKB1, TLR4, JUN, IL12RB2, TGFB1, IL21R, IL12RB1, NOD2, MAF, IL18, RORA, IFNGR1, STAT6, IL4, STAT3, TNF, SMAD2, NFATC1, FOXP3, IL2RG
REACTOME_GAP_JUNCTION_DEGRADATION	11	0.149203	0.0743627	0.224774	0.000310334	0.00738373	DNM1, CLTA, ACTB, DNM2, MYO6, GJA1, CLTC, ACTG1, CLTB, DAB2, AP2M1
WP_ACUTE_VIRAL_MYOCARDITIS	74	0.145187	0.0680647	0.22082	0.000313003	0.00738373	STAT1, CASP8, CREB1, BCL2, CXCR4, CD55, IL10, ABL2, PARP1, TLR5, ENDOG, ABL1, BCL2L1, SRC, MMP9, CASP6, TLR4, CAAP1, JAK1, CASP9, DFFA, DFFB, SGCB, NOS1, ACTB, CAV1, CASP2, CYCS, BID, CD4, TGFB1, BAX, ILK, EIF4G2, MAPK3, ITGAL, PYCARD, CCND1, TLR3, CASP3, NOD2, CASP1, BNIP2, DAG1, CCR5, LAMA2, FYN, ITGB2, SGCD, SGCA, STAT3, RAC3, AKT1, EDN1, RASA1, PIK3R1, SGCG, PABPC1, CHRAC1, RAC2, KRT8, SOCS1,…
REACTOME_CLASS_A_1_RHODOPSIN_LIKE_RECEPTORS	159	0.155671	0.0716954	0.238832	0.000318329	0.00739157	NPBWR1, CXCR2, CCL20, GPR55, ACKR3, GPR35, CXCR4, ADORA1, GPR37L1, XCL1, ACKR1, OPN3, APLNR, CHRM4, ADRA1D, EDN3, P2RY14, P2RY13, P2RY12, SUCNR1, P2RY1, RXFP1, ADORA3, S1PR1, LPAR3, PTGFR, PTGER3, PENK, CNR1, CCL19, LPAR1, EDN2, PTAFR, CNR2, HTR1D, ECE1, ADRA2C, NMU, CXCL5, PF4, CXCL1, CXCL2, CXCL9, CXCL10, CXCL13, CMKLR1, HCAR2, HCAR1, GPER1, GPR37, CHRM2, TACR1, PROKR1, OXTR, GHRL, HRH1, RHO, C…
WP_EICOSANOID_METABOLISM_VIA_LIPOOXYGENASES_LOX	20	0.310983	0.160797	0.458281	0.000319602	0.00739157	PTGR1, ACOX3, ALOX5, HPGD, DPEP1, GGT5, LTA4H, LTC4S, ALOX12, ALOX15, TRPV1, ACOX1, PTGR2, ACOX2, LTB4R2, PPARA, EHHADH, FPR2, PPARD, CYSLTR1
PID_ARF_3PATHWAY	19	0.133318	0.066628	0.200661	0.000344786	0.00789661	COPA, ARFGAP1, PIP5K1A, CLTA, USO1, RAC1, CD4, AP2A1, CYTH2, KDELR1, ARFIP2, ARF1, PLD2, GOSR2, GGA3, CLTB, ASAP1, AP2M1, GBF1
REACTOME_THE_ROLE_OF_NEF_IN_HIV_1_REPLICATION_AND_DISEASE_PATHOGENESIS	26	0.19666	0.0937827	0.297553	0.000353416	0.00801642	ATP6V1H, CD28, AP1S3, CD247, B2M, HCK, LCK, AP1S1, RAC1, CD4, AP2S1, AP2A1, AP2A2, AP1M1, AP1G1, AP1M2, FYN, AP1B1, DOCK2, ARF1, AP2B1, ELMO1, AP2M1, PAK2, PACS1, AP1S2
REACTOME_ANTIGEN_PROCESSING_CROSS_PRESENTATION	91	0.233926	0.112323	0.356718	0.000384676	0.00864238	LY96, PSMD1, NCF2, SEC61A2, MRC1, PSMD5, PSMB7, PSMD14, ITGAV, PSMC3, SNAP23, PDIA3, B2M, PSMF1, PSMA7, TLR2, S100A1, S100A8, S100A9, PSMB4, PSMD4, CTSS, SEC22B, PSMA5, SEC61B, TLR4, PSMB2, VAMP3, CD36, PSMC2, TLR1, TLR6, PSMD9, UBC, NCF1, HMGB1, SEM1, VAMP8, CD207, SEC61A1, PSMC4, PSMD8, PSMA1, PSMD13, IKBKB, UBA52, CALR, PSMB10, PSMD7, CYBA, TIRAP, PSMA4, MYD88, SEC61G, RPS27A, PSME4, UBB, PSMB…
BIOCARTA_PCAF_PATHWAY	13	0.191946	0.100214	0.284153	0.000392462	0.00870765	ATF2, NFKB1, JUN, HMGB1, IRF5, IRF3, IRF7, IRF2, IRF1, IRF4, CREBBP, KAT2B, RELA
REACTOME_RA_BIOSYNTHESIS_PATHWAY	16	0.168152	0.0811797	0.25345	0.000398779	0.00870765	RDH10, DHRS9, SDR16C5, DHRS3, CYP26B1, RDH13, ALDH1A3, CRABP1, ALDH1A2, RDH16, RDH5, RDH14, RDH11, DHRS4, ALDH1A1, CYP26A1
WP_TOLLLIKE_RECEPTOR_SIGNALING_PATHWAY	81	0.222093	0.103319	0.342029	0.000401432	0.00870765	LY96, STAT1, CASP8, IKBKE, AKT3, TLR5, TRAF6, IL1B, LBP, CD40, PIK3CA, TLR2, NFKB1, MAP3K7, TLR4, JUN, PIK3R3, PIK3CD, TLR1, TLR6, CXCL9, CXCL10, SPP1, RAC1, IRF5, AKT2, NFKBIB, IRF3, MAPK3, IRF7, TOLLIP, FADD, MAP2K7, IKBKB, TLR3, PIK3R2, TIRAP, MAP2K1, PIK3CB, TLR9, MYD88, TAB2, MAP2K2, TBK1, MAPK9, MAP2K3, MAP2K4, PIK3R5, CCL3, MAP2K6, PIK3CG, NFKBIA, FOS, TRAF3, AKT1, RIPK1, PIK3R1, MAPK8, TA…
KEGG_EPITHELIAL_CELL_SIGNALING_IN_HELICOBACTER_PYLORI_INFECTION	60	0.0931365	0.0435112	0.141804	0.000402346	0.00870765	ATP6V1H, CXCR2, F11R, SRC, PLCG1, NFKB1, LYN, ATP6V0D2, ATP6V1G1, JUN, ATP6V0B, CDC42, CXCL1, PTPN11, ATP6V0A2, RAC1, MET, PTPRZ1, ATP6V1F, ATP6V0A4, ATP6V0E2, NOD1, ATP6V1B1, ATP6V1E1, TJP1, PAK1, IKBKB, CASP3, ATP6V1B2, ATP6V0D1, PLCG2, JAM3, CSK, ADAM10, EGFR, MAPK9, MAP2K4, GIT1, ATP6V0A1, MAP3K14, ATP6V1C2, ADAM17, NFKBIA, ATP6V1D, MAPK8, ATP6V1C1, MAPK12, MAPK11, ATP6V1A, JAM2, ATP6V0C, MAP…
PID_EPHRINB_REV_PATHWAY	27	0.153217	0.073607	0.232056	0.000417895	0.00896195	NCK2, CXCR4, DNM1, HCK, SRC, PIK3CA, LYN, MAP3K7, RGS3, LCK, FGR, EPHB2, YES1, PTPN13, EPHB4, RAC1, EFNB2, EPHB1, FYN, MAP2K4, ITGA2B, ITGB3, PIK3R1, MAPK8, BLK, TIAM1, EFNB1
REACTOME_ALPHA_LINOLENIC_OMEGA3_AND_LINOLEIC_OMEGA6_ACID_METABOLISM	11	0.166697	0.0833154	0.25051	0.000447415	0.00950859	ACOT8, SCP2, ELOVL1, ACSL1, ELOVL5, ACOX1, HSD17B4, FADS2, FADS1, ELOVL3, ABCD1
REACTOME_METAL_ION_SLC_TRANSPORTERS	21	0.121607	0.0564828	0.187368	0.000472894	0.00989084	SLC40A1, SLC39A10, SLC11A1, SLC41A1, SLC30A1, CP, SLC39A1, SLC39A8, SLC31A1, SLC30A2, SLC39A3, SLC41A2, SLC39A5, SLC30A5, SLC39A2, SLC39A14, SLC39A4, SLC11A2, SLC39A7, SLC39A6, HEPH
KEGG_TOLL_LIKE_RECEPTOR_SIGNALING_PATHWAY	80	0.221287	0.100531	0.339711	0.000473788	0.00989084	LY96, STAT1, CASP8, IKBKE, AKT3, TLR5, TRAF6, IL1B, LBP, CD40, PIK3CA, TLR2, CTSK, NFKB1, MAP3K7, TLR4, JUN, PIK3R3, PIK3CD, TLR1, TLR6, CXCL9, CXCL10, SPP1, RAC1, IRF5, AKT2, IRF3, MAPK3, IRF7, TOLLIP, FADD, MAP2K7, IKBKB, TLR3, PIK3R2, TIRAP, MAP2K1, PIK3CB, TLR9, MYD88, TAB2, MAP2K2, TBK1, MAPK9, MAP2K3, MAP2K4, PIK3R5, CCL3, MAP2K6, PIK3CG, NFKBIA, FOS, TRAF3, AKT1, RIPK1, PIK3R1, MAPK8, TAB1…
REACTOME_INTERLEUKIN_27_SIGNALING	10	0.227083	0.109635	0.342271	0.000496591	0.0101484	STAT1, JAK1, CRLF1, IL27RA, TYK2, CANX, STAT3, IL6ST, EBI3, JAK2
REACTOME_INFECTION_WITH_MYCOBACTERIUM_TUBERCULOSIS	25	0.161852	0.075191	0.248963	0.000499007	0.0101484	ATP6V1H, MRC1, B2M, TLR2, SFPQ, ENO1, UBC, DUSP16, GSK3A, VPS33B, CORO1A, MAPK3, UBA52, RPS27A, UBB, NOS2, KPNB1, RNF213, HGS, TRIM27, CTSG, MAPK1, KPNA1, RAB5A, PGK1
WP_PHOTODYNAMIC_THERAPYINDUCED_UNFOLDED_PROTEIN_RESPONSE	23	0.0881483	0.0415923	0.134946	0.000499032	0.0101484	ATF6, ATF3, HSPA5, NFE2L2, BCL2L11, TRIB3, EIF2A, ASNS, EIF2AK3, EDEM1, BBC3, PPP1R15A, CALR, HSP90B1, DDIT3, XBP1, ERN1, PDIA6, DNAJB9, UBE2E1, DNAJC3, ATF4, DNAJB11
PID_IL23_PATHWAY	27	0.374674	0.19656	0.554528	0.000515202	0.0103877	IL17A, IL17F, IL18R1, IL18RAP, STAT1, IL1B, PIK3CA, NFKB1, CXCL1, CXCL9, CD4, IL12RB1, TYK2, CD3E, IL18, ALOX12B, NOS2, CCL2, ITGA3, STAT5A, STAT3, SOCS3, NFKBIA, PIK3R1, TNF, RELA, JAK2
REACTOME_TRANSPORT_OF_BILE_SALTS_AND_ORGANIC_ACIDS_METAL_IONS_AND_AMINE_COMPOUNDS	58	0.144908	0.0661572	0.222138	0.000527533	0.0105462	SLC40A1, SLC39A10, SLC11A1, SLC41A1, SLC30A1, SLC13A3, CP, RHBG, SLC39A1, SLC22A15, SLC16A1, SLC44A3, SLC39A8, SLC44A1, SLC31A1, SLC6A9, SLC30A2, SLC10A6, SLC13A4, SLC6A6, SLC6A1, SLC6A13, SLC6A12, SLC22A18, SLC6A2, SLC44A2, BSG, SLC39A3, SLC41A2, SLC6A15, SLC16A7, SLC39A5, SLC22A5, SLC22A4, SLC47A1, SLC13A5, SLC16A3, SLC6A18, SLC6A19, SLC30A5, EMB, SLC39A2, SLC39A14, SLC39A4, SLC16A8, SLC2A13, S…
BIOCARTA_NKT_PATHWAY	18	0.349356	0.166094	0.529087	0.000535068	0.0106069	IL18R1, CD28, CXCR4, TGFB2, IL12RB2, CD4, TGFB1, IL12RB1, CCR4, CCR1, CCR5, IFNGR1, IL4, CCL3, CCR7, TGFB3, IFNGR2, CXCR3
REACTOME_METABOLISM_OF_LIPIDS	627	0.0716839	0.0314704	0.112292	0.000545438	0.0107224	NCOA2, INPP4A, NPAS2, FHL2, ORMDL1, PIKFYVE, ACADL, PECR, CYP27A1, GLB1L, SGPP2, MOGAT1, ACSL3, NEU2, INPP5D, KDSR, DBI, INSIG2, MAPKAPK2, PIK3C2B, PLEKHA6, ETNK2, PLA2G4A, PTGS2, RGL1, ACBD6, HSD17B7, LBR, DEGS1, LPGAT1, HSD11B1, G0S2, OLAH, PHYH, CUBN, HACD1, PIP4K2A, ACBD5, PNPLA7, PTGDS, INPP5E, AGPAT2, MED22, RXRA, MED27, MIGA2, CRAT, PTGES, PTGES2, RAB14, PTGS1, GPD2, PLA2R1, CERS6, ABCB11,…
WP_SPHINGOLIPID_METABOLISM_OVERVIEW	22	0.228669	0.105857	0.350214	0.000556528	0.0108138	SGPP2, KDSR, DEGS1, CERS6, CERS2, SGMS2, UGCG, PLPP3, SPHK2, CERS3, SMPD1, CERS4, ASAH1, CERS1, SGPL1, SPHK1, SGPP1, SPTLC2, DEGS2, SPTLC1, CERK, SGMS1
WP_MIRNA_ROLE_IN_IMMUNE_RESPONSE_IN_SEPSIS	33	0.306596	0.142221	0.471825	0.000559254	0.0108138	IL10, LCN2, TRAF6, IL1A, VCAM1, NFKB1, MAP3K7, TLR4, IRF5, RELB, IRF7, IKBKB, ICAM1, MYD88, TAB2, REL, IRF1, CCL3, NFKBIA, TRAF3, MAPK8, GZMB, TAB1, IRAK4, MAPK14, TNF, RELA, CHUK, NFKB2, IRAK1, IKBKG, TLR8, TLR7
WP_PI3KAKTMTOR_VITAMIN_D3_SIGNALING	19	0.175384	0.0834367	0.267807	0.000563934	0.0108156	IL10, RXRA, TSC1, PIK3CA, PRKAA2, MTOR, SLC2A3, LDHA, PFKFB4, AKT1, HK3, MYC, VDR, CD86, GSK3B, CD80, TSC2, RELA, PDHA1
WP_IL1_AND_MEGAKARYOCYTES_IN_OBESITY	21	0.339372	0.163603	0.516051	0.000571404	0.0108705	IL1R1, FCER1A, IL1B, MMP9, PIK3CA, TLR2, S100A9, SELENBP1, NFKB1, TLR1, ICAM1, IL18, MYD88, NLRP3, CCL2, TIMP2, F2R, PLA2G7, HBEGF, TIMP1, IRAK1
PID_REELIN_PATHWAY	26	-0.0696539	0.108619	0.0314407	0.000580284	0.0109511	NCK2, RAPGEF1, PIK3CA, ARHGEF2, RAP1A, DAB1, LRP8, RELN, CDK5, LRPAP1, MAP2K7, ITGB1, CBL, FYN, PAFAH1B1, CDK5R1, ITGA3, MAPT, AKT1, MAP1B, PIK3R1, MAPK8, CRKL, GSK3B, MAP3K11, VLDLR
WP_TCELL_ANTIGEN_RECEPTOR_TCR_PATHWAY_DURING_STAPHYLOCOCCUS_AUREUS_INFECTION	56	0.178917	0.0911837	0.264959	0.000590644	0.0110582	ZAP70, CD28, CTLA4, ICOS, PDCD1, IL10, PTPRC, PRKCQ, PDK1, CHP1, PLCG1, NFATC2, PIK3CA, NFKB1, BCL10, MAP3K7, JUN, LCK, CARD11, RAF1, PTPN6, CD4, RRAS, PAK1, LAT, MAPK3, MAP2K7, IKBKB, CBL, CD3D, MAP2K1, NCK1, DAG1, FYN, MAP2K2, CDK4, LCP2, ITK, MAPK9, IL4, MAP3K14, GRB2, NFKBIA, FOS, AHSA1, CALM1, AKT1, GRAP2, DLG1, GSK3B, TNF, SOS1, MAP3K8, MALT1, CHUK, IKBKG
WP_PKCGAMMA_CALCIUM_SIGNALING_PATHWAY_IN_ATAXIA	18	-0.171976	0.267623	0.0781746	0.000600328	0.011151	PDK1, RYR3, PLCB2, PLCB1, PLCB4, TRPC3, ITPR1, ATP2B2, PRKCG, HOMER3, CACNA1A, GNA15, GNA11, GRIA1, PLCB3, GNAQ, GNA14, GRIA3
KEGG_SPHINGOLIPID_METABOLISM	35	0.193895	0.0922456	0.296539	0.000619073	0.0114093	SGPP2, NEU2, KDSR, DEGS1, SGMS2, UGCG, ACER2, PLPP3, SPHK2, ACER3, NEU3, SMPD1, ASAH1, SMPD3, GLB1, SMPD2, SGPL1, PLPP2, GAL3ST1, SPHK1, SGPP1, SPTLC2, GALC, DEGS2, SPTLC1, PLPP1, CERK, ARSA, SMPD4, NEU1, ACER1, B4GALT6, ASAH2, SGMS1, GLA
KEGG_B_CELL_RECEPTOR_SIGNALING_PATHWAY	69	0.165085	0.0720956	0.258558	0.000632186	0.0115607	INPP5D, FCGR2B, AKT3, VAV2, CHP1, NFATC2, PIK3CA, NRAS, VAV3, NFKB1, PPP3CA, DAPP1, BCL10, LYN, CD72, JUN, PIK3R3, PIK3CD, CARD11, RAC1, RAF1, PTPN6, KRAS, AKT2, NFKBIB, CHP2, PRKCB, MAPK3, IFITM1, HRAS, CD81, IKBKB, PIK3R2, NFATC3, NFAT5, PLCG2, MAP2K1, PIK3CB, MAP2K2, PPP3R1, PIK3R5, CD79B, GRB2, RAC3, PIK3CG, NFKBIA, SOS2, FOS, AKT1, SYK, PIK3R1, PPP3CB, NFATC4, PPP3CC, RAC2, MAPK1, GSK3B, NFK…
REACTOME_O_GLYCOSYLATION_OF_TSR_DOMAIN_CONTAINING_PROTEINS	35	-0.213109	0.328266	0.0990673	0.000641615	0.0116428	SBSPON, THSD7B, ADAMTS4, ADAMTSL2, THBS1, ADAMTSL4, ADAMTSL1, SPON2, ADAMTS3, B3GLCT, THSD7A, ADAMTS9, ADAMTS17, ADAMTSL3, SPON1, THSD1, ADAMTS18, ADAMTS15, ADAMTS8, THSD4, ADAMTS7, ADAMTS14, POFUT2, ADAMTSL5, ADAMTS2, ADAMTS6, ADAMTS12, SEMA5A, ADAMTS20, ADAMTS1, ADAMTS5, THBS2, ADAMTS10, ADAMTS19, CFP
WP_NEPHROGENESIS	12	-0.122712	0.190827	0.0552977	0.000682058	0.0122822	JAG1, BMP7, NOTCH2, RSPO1, WNT4, ALDH1A2, RSPO3, MEIS1, WNT3A, OSR1, FOXD1, GREB1L
WP_PATHWAYS_OF_NUCLEIC_ACID_METABOLISM_AND_INNATE_IMMUNE_SENSING	11	0.193083	0.0961395	0.28909	0.000693403	0.0123919	RNASEL, IFIH1, MAVS, SAMHD1, ADAR, IRF3, RNASEH2A, CGAS, RNASEH2B, STING1, RNASEH2C
WP_16P112_PROXIMAL_DELETION_SYNDROME	64	0.0432171	0.0187673	0.0671947	0.000722755	0.0128194	CASP8, TRAF2, TRAF6, PCNA, CCT3, NFKB1, UNC13B, KMT2C, PAXIP1, CCT6A, CCT7, PPP4R2, PPARG, CORO1A, MAPK3, GDPD3, YPEL3, TBX6, PPP4C, ALDOA, INO80E, HIRIP3, TAOK2, TMEM219, KCTD13, ASPHD1, SEZ6L2, CDIPT, MVP, PRRT2, MAZ, KIF22, QPRT, SPN, PPP2CB, UNC13A, ESR1, CCDC6, CCT2, IGFBP3, CCT4, REL, PPP4R3B, PPP2CA, MAP2K3, BPTF, MAP2K6, PPP4R3A, PPP4R4, PARP4, CCT5, KMT2D, HIRA, CCT8, EZR, TCP1, PPP2R1A,…
REACTOME_GPCR_LIGAND_BINDING	222	0.110827	0.0468161	0.1736	0.000736532	0.0128994	NPBWR1, FZD7, FZD5, CXCR2, WNT6, WNT10A, CCL20, GPR55, ACKR3, RAMP1, GPR35, SCTR, CXCR4, CD55, ADORA1, GPR37L1, XCL1, ACKR1, OPN3, CALCRL, APLNR, CHRM4, ADRA1D, GNAS, EDN3, GNB4, P2RY14, P2RY13, P2RY12, SUCNR1, P2RY1, RXFP1, WNT2B, ADORA3, S1PR1, LPAR3, GNG5, PTGFR, PTGER3, PENK, CNR1, CCL19, LPAR1, GNG10, PTCH2, EDN2, PTAFR, CNR2, HTR1D, WNT4, ECE1, GNB1, TAS1R3, FZD1, SHH, ADRA2C, NMU, CXCL5, P…
REACTOME_ANCHORING_FIBRIL_FORMATION	15	-0.229454	0.356374	0.101875	0.000738201	0.0128994	COL4A4, COL4A3, LAMC2, LAMB3, COL1A2, COL4A1, COL4A2, TLL1, COL7A1, COL1A1, BMP1, LAMA3, TLL2, COL4A6, COL4A5
KEGG_FC_EPSILON_RI_SIGNALING_PATHWAY	68	0.159869	0.0680694	0.249896	0.000753409	0.0130683	INPP5D, PLA2G4A, FCER1G, FCER1A, AKT3, VAV2, PLA2G4B, PLA2G4E, PLCG1, PIK3CA, NRAS, VAV3, PLA2G12A, LYN, PIK3R3, PLA2G2F, PLA2G2D, PLA2G5, PLA2G2E, PIK3CD, RAC1, RAF1, KRAS, AKT2, GAB2, PRKCB, LAT, MAPK3, HRAS, MAP2K7, PIK3R2, PLCG2, MAP2K1, PIK3CB, FYN, MAP2K2, PLA2G3, LCP2, MAPK9, IL4, MAP2K3, MAP2K4, PIK3R5, PRKCA, MAP2K6, GRB2, RAC3, PIK3CG, SOS2, AKT1, SYK, PIK3R1, PRKCD, MAPK8, RAC2, PLA2G6…
WP_RALA_DOWNSTREAM_REGULATED_GENES	12	0.130298	0.0584854	0.200727	0.000758984	0.0130689	NRAS, CDC42, RAC1, YBX3, KRAS, HRAS, EXOC8, RAC3, RALA, EXOC2, RAC2, RALBP1
REACTOME_THE_CANONICAL_RETINOID_CYCLE_IN_RODS_TWILIGHT_VISION	16	0.207806	0.0925049	0.320885	0.00077405	0.0132021	RDH10, DHRS9, LRAT, ABCA4, NAPEPLD, RHO, RLBP1, MYO7A, STRA6, RBP1, RDH16, SDR9C7, RDH5, RDH11, RDH12, RBP4
WP_TYROBP_CAUSAL_NETWORK_IN_MICROGLIA	56	0.302091	0.128461	0.472367	0.000777911	0.0132021	RGS1, NCF2, SFT2D2, CD84, HLX, APBB1IP, DPYD, TGFBR1, FKBP15, RPS6KA1, RUNX3, C1QC, TNFRSF1B, CYTL1, RBM47, SPP1, SH2B3, CREB3L2, CAPG, LOXL3, CD4, SLC1A5, TYROBP, CD37, KCNE3, IGSF6, PYCARD, ITGAM, ITGAX, LYL1, MAF, IL10RA, IL18, GPX1, ITGB2, PLEK, CXCL16, ADAP2, STAT5A, TMEM106A, NPC2, LHFPL2, RNASE6, SLC7A7, ABCC4, BIN2, NCKAP1L, NRROS, HCLS1, SAMSN1, PPP1R18, C3, ZFP36L2, TCIRG1, IL13RA1, ELF4
WP_MEASLES_VIRUS_INFECTION	106	0.118493	0.0499356	0.185726	0.000792766	0.0133581	STAT1, CASP8, CD28, BCL2, IKBKE, CSNK2A3, FCGR2B, NECTIN4, CD46, IL2RA, IFIH1, TRAF6, EIF2AK4, IL1A, IL1B, MAVS, CSNK2A1, BCL2L1, PIK3CA, TLR2, ADAR, NFKB1, CCNE2, MAP3K7, TLR4, JUN, JAK1, PIK3R3, CASP9, PIK3CD, CDK6, RCHY1, OAS2, OAS3, EIF2AK1, CYCS, EIF2AK3, BID, CCND2, CDKN1B, BBC3, NFKBIB, CCNE1, IRF3, BAX, IRF7, FADD, CCND1, IKBKB, CASP3, PIK3R2, JAK3, CSNK2A2, TRADD, TYK2, HSPA8, CD3G, CD3D…
WP_SPHINGOLIPID_METABOLISM_INTEGRATED_PATHWAY	25	0.199552	0.0877191	0.311965	0.000837558	0.0140128	SGPP2, KDSR, DEGS1, CERS6, CERS2, SGMS2, UGCG, PLPP3, SPHK2, CERS3, SMPD1, CERS4, ASAH1, CERS1, SGPL1, PLPP2, SPHK1, SGPP1, SPTLC2, DEGS2, SPTLC1, PLPP1, CERK, CERS5, SGMS1
PID_IL27_PATHWAY	18	0.419575	0.225062	0.610358	0.000867864	0.0144175	IL17A, STAT1, GATA3, IL1B, JAK1, IL12RB2, TGFB1, IL12RB1, IL27RA, TYK2, IL18, STAT2, STAT5A, STAT3, IL6ST, TNF, EBI3, JAK2
WP_OXYSTEROLS_DERIVED_FROM_CHOLESTEROL	34	0.276897	0.142791	0.408424	0.000879038	0.0144601	IL17A, IL17F, CYP27A1, HSD11B1, LBP, ACOT8, CYP7B1, THEM5, RORC, ACOT11, SCP2, ACOT7, INSIG1, NR1H2, DBP, HSD3B7, DHCR7, CYP8B1, ESR1, ACOT2, ACOT1, ACOT4, ACOT6, CYP46A1, ACOT13, ACOT12, ACOX2, IL17D, EPHX2, GPR183, AMACR, CYP39A1, EBP, ACOT9
WP_CHOLESTEROL_METABOLISM	54	0.23924	0.111296	0.364722	0.000882683	0.0144601	CYP27A1, SOAT1, HSD17B7, LBR, SLC27A4, ABCB11, PLTP, FDPS, PMVK, SORT1, MTTP, ABCA1, PCSK9, DHCR24, LDLRAP1, CD36, LRPAP1, MVK, SCARB1, APOC1, APOE, OSBPL5, DHCR7, STAR, MSMO1, LPL, LCAT, MVD, LDLR, SC5D, LSS, LRP1, NPC1L1, MGAT1, SAR1B, VDAC1, STARD3, NPC2, IDI1, MYLIP, HMGCR, HMGCS1, FDFT1, SQLE, DGAT1, TSPO, ACAT2, VAPA, NPC1, LIPG, TM7SF2, LIPA, EBP, NSDHL
WP_CIRCADIAN_RHYTHM_GENES	153	-0.0562401	0.0893143	0.0234871	0.000916878	0.014829	NCOA2, NPAS2, CREB1, PER2, TNFRSF11A, PHLPP1, ADORA1, DHX9, OPN3, HNRNPU, PROX1, SUV39H2, PTGDS, SETX, NR1H3, CRY2, LGR4, CST3, AHCY, TOP1, ADA, NOCT, NTRK1, CHRNB2, RORC, ARNT, CIART, MTTP, JUN, PRKAA2, THRAP3, SFPQ, HDAC1, ID3, PER3, TYMS, PPP1CB, PPARGC1A, CLOCK, PRKG2, HNRNPD, PPP1CC, UBC, CLDN4, SERPINE1, LEP, CUL1, EZH2, GFPT1, PROKR1, BHLHE40, GHRL, PPARG, KDM5A, HEBP1, BHLHE41, PRKCG, REL…
WP_SELECTIVE_EXPRESSION_OF_CHEMOKINE_RECEPTORS_DURING_TCELL_POLARIZATION	19	0.363981	0.161913	0.568025	0.000917777	0.014829	IL18R1, CD28, CXCR4, TGFB2, IL12RB2, CD4, TGFB1, IL12RB1, CCR4, CCR1, CCR2, CCR5, IFNGR1, IL4, CCL3, CCR7, TGFB3, IFNGR2, CXCR3
REACTOME_REGULATION_OF_INNATE_IMMUNE_RESPONSES_TO_CYTOSOLIC_DNA	13	0.20181	0.0883572	0.316371	0.00100618	0.0161468	ZBP1, TRIM32, UBC, TRIM56, IRF3, TRIM21, UBA52, TBK1, RPS27A, UBB, DDX41, STING1, DTX4
WP_HOSTPATHOGEN_INTERACTION_OF_HUMAN_CORONAVIRUSES_INTERFERON_INDUCTION	31	0.19118	0.0818299	0.301599	0.00104604	0.0166103	STAT1, IKBKE, IFIH1, TRAF6, MAVS, NFKB1, MAP3K7, JUN, JAK1, OAS2, OAS3, IRF3, IKBKB, TYK2, MYD88, TBK1, STAT2, NFKBIA, FOS, TRAF3, RIPK1, MAPK8, IRF9, IFNAR2, IFNAR1, MAPK14, TICAM1, EIF2AK2, CHUK, IKBKG, TLR7
REACTOME_INTERLEUKIN_4_AND_INTERLEUKIN_13_SIGNALING	90	0.175007	0.0762811	0.271827	0.00104915	0.0166103	IL17A, IL17F, STAT1, FN1, BCL2, IL10, PTGS2, POU2F1, GATA3, VIM, LCN2, IL1A, IL1B, BCL2L1, LBP, MMP9, LAMA5, SOX2, FGF2, FOXO1, MUC1, RORC, MCL1, S1PR1, VCAM1, JAK1, TNFRSF1B, HGF, CD36, FSCN1, COL1A2, ALOX5, TGFB1, NDN, ITGAM, ITGAX, CCND1, JAK3, HMOX1, JUNB, MMP2, CCL22, RHOU, ITGB1, MMP3, ICAM1, TYK2, HSPA8, IL18, RORA, FOXO3, ITGB2, HSP90B1, STAT6, OSM, LIF, IL4, ALOX15, NOS2, CCL2, CCL11, ST…
REACTOME_INTERLEUKIN_17_SIGNALING	67	0.117572	0.0580013	0.177724	0.00115785	0.0182091	IL17A, IL17F, CREB1, MAPKAPK2, ATF2, TRAF6, UBE2V1, NFKB1, RIPK2, MAP3K7, JUN, RPS6KA1, TNIP2, UBC, CUL1, NOD1, IL17RE, IL17RC, IRAK2, IL17RA, VRK3, MEF2A, MAPK3, MAP2K7, IKBKB, PPP2CB, DUSP4, UBA52, NOD2, PPP2R1B, MAP2K1, DUSP7, MAPKAPK3, TAB2, UBE2N, DUSP6, RPS27A, FBXW11, MAPK9, PPP2CA, MAP2K3, MAPK7, UBB, MAP2K4, DUSP3, MAP2K6, FOS, RPS6KA5, MEF2C, IL17RB, MAPK8, TAB1, MAPK11, ATF1, MAPK1, RP…
REACTOME_FORMATION_OF_THE_CORNIFIED_ENVELOPE	103	0.792329	0.322486	1.26678	0.00118907	0.0185762	PKP1, PKP4, TGM5, SPRR2B, SPRR2D, SPRR2E, SPRR2F, SPRR2G, SPRR1B, SPRR1A, IVL, LCE6A, LCE1B, LCE1C, LCE1D, LCE1E, LCE1F, LCE3A, LCE3B, LCE3C, LCE3D, LCE3E, FLG, RPTN, TCHH, KAZN, CAPNS1, KLK14, KLK13, KLK12, KLK8, KLK5, PCSK6, FURIN, PRSS8, PKP3, ST14, PERP, CASP14, KRT24, KRT25, KRT26, KRT27, KRT28, KRT10, KRT20, KRT23, KRT39, KRT40, KRT33A, KRT33B, KRT34, KRT31, KRT32, KRT35, KRT36, KRT15, KRT1…
REACTOME_SIGNAL_REGULATORY_PROTEIN_FAMILY_INTERACTIONS	10	0.161419	0.0708611	0.251538	0.00120012	0.0186255	SIRPA, SRC, PTPN11, SKAP2, PTPN6, TYROBP, GRB2, PTK2B, PTK2, CD47
REACTOME_REGULATION_OF_IFNA_IFNB_SIGNALING	12	0.20015	0.0848335	0.314281	0.00124821	0.0192453	STAT1, PTPN1, JAK1, PTPN11, USP18, PTPN6, TYK2, STAT2, SOCS3, SOCS1, IFNAR2, IFNAR1
PID_PI3KCI_PATHWAY	48	0.177899	0.0716665	0.282081	0.00127183	0.0194822	ZAP70, HCK, SRC, PLCG1, PIK3CA, NRAS, RAP1A, DAPP1, LYN, PIK3R3, LCK, FGR, PIK3CD, YES1, ADAP1, RAC1, CYTH3, ARF5, KRAS, CYTH2, INPPL1, LAT, PLEKHA1, HRAS, PLEKHA2, PIK3R2, PLCG2, PIK3CB, RHOA, SGK1, FYN, FOXO3, ITK, ARF1, PIK3R5, PIK3R6, CYTH1, PIK3CG, ARF6, HSP90AA1, SYK, PIK3R1, BLK, PDPK1, ARAP3, PTEN, BLNK, BTK
REACTOME_PURINERGIC_SIGNALING_IN_LEISHMANIASIS_INFECTION	25	0.214063	0.089335	0.34001	0.00130652	0.0198843	IL1A, IL1B, TXNIP, NFKB1, P2RX7, P2RX4, C3AR1, PYCARD, HMOX1, CASP1, IL18, PSTPIP1, NT5E, NLRP3, ENTPD5, CTSG, SUGT1, GSDMD, MEFV, APP, HSP90AB1, C3, RELA, ENTPD1, NFKB2
BIOCARTA_BCR_PATHWAY	32	0.120666	0.0497956	0.190169	0.00131968	0.0199559	PLCG1, NFATC2, SHC1, PPP3CA, LYN, JUN, RAC1, RAF1, CALM3, PRKCB, MAPK3, HRAS, NFATC3, MAP2K1, CD79B, PRKCA, GRB2, FOS, CALM1, SYK, MAP3K1, PPP3CB, MAPK8, NFATC4, PPP3CC, MAPK14, VAV1, SOS1, CALM2, NFATC1, ELK1, BTK
WP_SPLICING_FACTOR_NOVA_REGULATED_SYNAPTIC_PROTEINS	36	-0.120437	0.193131	0.0491457	0.00135198	0.0203141	CLASP1, CADM3, PLCB4, EPB41L1, KCNQ2, NTNG1, DAB1, NCDN, EPB41, RAP1GAP, CLSTN1, PRKCZ, AGRN, STX2, CAV2, CHL1, STXBP2, TERF2IP, APLP2, CADM1, NEO1, MAP4, EPB41L2, GRIK2, ANK3, ATP2B1, MAPK9, GPHN, SNW1, CAMK2G, KCNMA1, EFNA5, EPB41L3, CDH2, MAPK4, CASK
WP_CYTOSOLIC_DNASENSING_PATHWAY	52	0.168611	0.0687585	0.266539	0.00137282	0.0204265	CASP8, IKBKE, AIM2, IL1B, MAVS, POLR3F, ZBP1, POLR3K, ADAR, POLR3GL, POLR3C, NFKB1, ISG15, CXCL10, POLR1D, NFKBIB, IRF3, POLR3E, PYCARD, IRF7, POLR2L, FADD, IKBKB, CYLD, TRADD, CASP1, NLRX1, IL18, CGAS, ATG5, POLR2E, POLR3B, TBK1, TRIM25, NFKBIA, RIPK1, POLR3G, POLR3A, RIPK3, POLR3D, POLR2K, POLR2F, POLR3H, POLR2H, POLR1C, RNF125, STING1, ATG12, RELA, IL33, CHUK, IKBKG
KEGG_FC_GAMMA_R_MEDIATED_PHAGOCYTOSIS	91	0.132935	0.0526229	0.214034	0.00138446	0.0204265	PIKFYVE, ARPC2, INPP5D, PTPRC, PLA2G4A, ARPC5, DNM3, FCGR2B, AKT3, VAV2, DNM1, GSN, ARPC5L, PLA2G4B, PLA2G4E, PLA2G4D, PLA2G4F, HCK, PLCG1, PLD1, PIK3CA, PIP5K1A, VAV3, LYN, PLPP3, PIK3R3, MARCKSL1, WASF2, ASAP3, CDC42, PIK3CD, ARPC3, NCF1, LIMK1, RAC1, ARPC1A, ARPC1B, WASF3, WASL, ARPC4, RAF1, PRKCG, VASP, AKT2, SPHK2, GAB2, PAK1, PRKCB, LAT, MAPK3, PIK3R2, PLCG2, DNM2, MAP2K1, PIK3CB, MARCKS, W…
NABA_MATRISOME_ASSOCIATED	446	0.0799487	0.0311172	0.127836	0.00138544	0.0204265	SULF1, IL17A, IL17F, SEMA4C, MSTN, ADAM23, WNT6, WNT10A, INHA, SERPINE2, CCL20, GPC1, SERPINB5, SERPINB12, SERPINB13, SERPINB11, SERPINB7, SERPINB2, SERPINB10, SERPINB8, INHBB, IL10, CTSE, FAM20B, ANGPTL1, PAPPA2, TNFSF18, XCL1, ADAMTS4, LEFTY1, TGFB2, PLXNA2, ITIH2, ITIH5, PLXDC2, IL1F10, IL1RN, EGFL7, ADAMTSL2, ANGPTL2, FRZB, SERPING1, C1QTNF4, MDK, PAMR1, BDNF, MUC15, GREM1, TGM5, TGM7, SEMA6D…
PID_NFAT_TFPATHWAY	35	0.14239	0.0571149	0.228501	0.00140867	0.02064	CTLA4, PTGS2, POU2F1, BATF3, GATA3, PRKCQ, IL2RA, E2F1, ITCH, PTPN1, NFATC2, GBP3, JUN, PPARG, CASP3, JUNB, NFATC3, MAF, PTPRK, EGR2, CDK4, DGKA, IKZF1, IL4, FOS, IRF4, EGR3, CBLB, TNF, EGR1, NFATC1, FOSL1, SLC3A2, FOXP3, RNF128
REACTOME_NUCLEOTIDE_BINDING_DOMAIN_LEUCINE_RICH_REPEAT_CONTAINING_RECEPTOR_NLR_SIGNALING_PATHWAYS	54	0.1075	0.042735	0.171014	0.00144657	0.0210645	CASP8, AAMP, BCL2, AIM2, CARD9, TRAF6, BCL2L1, ITCH, UBE2V1, TXNIP, NFKB1, RIPK2, MAP3K7, CASP9, P2RX7, UBC, CASP2, NOD1, IRAK2, PYCARD, IKBKB, UBA52, HMOX1, NOD2, CYLD, CASP1, CASP4, BIRC2, BIRC3, PANX1, PSTPIP1, TAB2, TNFAIP3, UBE2N, RPS27A, NLRP3, UBB, MAP2K6, SUGT1, TAB1, MAPK12, MAPK11, MEFV, APP, MAPK14, MAPK13, HSP90AB1, NLRC4, RELA, CHUK, NFKB2, IRAK1, IKBKG, TAB3
REACTOME_TRAF3_DEPENDENT_IRF_ACTIVATION_PATHWAY	12	0.27071	0.119118	0.419389	0.001487	0.0215205	IKBKE, IFIH1, MAVS, SIKE1, IRF3, IRF7, TBK1, RNF135, TRIM25, TRAF3, EP300, CREBBP
SIG_PIP3_SIGNALING_IN_B_LYMPHOCYTES	32	0.135061	0.0532341	0.215309	0.00154436	0.0222143	SAG, PTPRC, AKT3, PREX1, PIK3CA, PITX2, DAPP1, LYN, RPS6KA1, TEC, CYTH3, ITPR1, ITPR2, AKT2, GAB1, PLCG2, FOXO3, BCR, PIK3R5, FLOT2, RPS6KB1, PPP1R13B, AKT1, SYK, RPS6KA2, PDPK1, ITPR3, FLOT1, VAV1, PTEN, BTK, RPS6KA3
KEGG_TERPENOID_BACKBONE_BIOSYNTHESIS	14	0.275532	0.109461	0.439893	0.00160894	0.0230006	PDSS1, FDPS, PMVK, HMGCS2, DHDDS, MVK, MVD, ACAT1, PDSS2, IDI1, GGPS1, HMGCR, HMGCS1, ACAT2
REACTOME_ASSEMBLY_OF_COLLAGEN_FIBRILS_AND_OTHER_MULTIMERIC_STRUCTURES	57	-0.218669	0.352473	0.0841689	0.00161853	0.0230006	COL9A1, DST, COL3A1, COL5A2, COL4A4, COL4A3, COL6A3, LAMC2, LAMB3, COL5A1, ITGA6, MMP9, COL9A3, CTSS, COL11A1, COL24A1, COL15A1, COL27A1, COL9A2, COL8A2, PCOLCE, COL1A2, LOXL3, CD151, COL4A1, COL4A2, TLL1, MMP3, COL5A3, LOXL1, COL12A1, COL6A6, COL6A5, COL7A1, COL10A1, COL6A2, COL6A1, COL18A1, COL1A1, ITGB4, PXDN, CTSL, CTSB, LOXL2, BMP1, COL14A1, PLEC, COL2A1, COL8A1, COL11A2, LAMA3, LOX, TLL2, L…
REACTOME_VOLTAGE_GATED_POTASSIUM_CHANNELS	28	-0.239515	0.387234	0.0933203	0.00169306	0.0239157	KCNQ5, KCNH1, KCNS1, KCNB1, KCNG1, KCNQ2, KCNAB1, KCND3, KCNA2, KCNC4, KCNQ4, KCNAB2, KCNH2, KCNA5, KCNA1, KCNA6, KCNC3, KCNA7, KCNC1, KCNQ1, KCNG4, KCNAB3, KCNS3, KCNF1, KCNQ3, KCNH3, KCNG2, KCND1
WP_DEVELOPMENT_OF_PULMONARY_DENDRITIC_CELLS_AND_MACROPHAGE_SUBSETS	10	0.241158	0.0967132	0.382821	0.00171968	0.0241471	BATF3, SPI1, CSF1, IRF8, IKZF1, STAT3, ID2, IRF4, RUNX2, TCF4
REACTOME_PHASE_0_RAPID_DEPOLARISATION	25	-0.293131	0.473538	0.113657	0.00182051	0.0254118	CACNB2, SCN3A, SCN2A, SCN7A, CAMK2D, CACNA1C, CACNG7, CACNG6, SCN1B, SCN3B, SCN2B, SCN4B, CACNA2D2, SCN5A, CAMK2B, FGF11, CACNB1, SCN4A, CACNG4, CALM1, CAMK2G, FGF14, SCN8A, CAMK2A, FGF13
REACTOME_CELL_SURFACE_INTERACTIONS_AT_THE_VASCULAR_WALL	102	0.127279	0.0476262	0.205393	0.00183872	0.0254446	FN1, INPP5D, GPC1, FCAMR, SELE, SELP, ATP1B1, FCER1G, F11R, CD48, CD84, GRB14, ITGA6, ITGA4, ITGAV, CD44, MERTK, SIRPA, THBD, ANGPT4, PROCR, SRC, PLCG1, SDC4, PIK3CA, SLC7A11, SHC1, CD2, NRAS, SLC16A1, LYN, TEK, LCK, SDC3, YES1, PF4, SELPLG, PTPN11, COL1A2, CAV1, PTPN6, KRAS, CEACAM3, CEACAM1, TGFB1, MAG, SLC7A10, SPN, ITGAL, ITGAM, ITGAX, HRAS, GAS6, ANGPT2, PIK3R2, SLC7A6, GLG1, SLC7A5, ITGB1, …
PID_P38_ALPHA_BETA_PATHWAY	30	0.106458	0.041844	0.169826	0.00184443	0.0254446	RALB, DUSP10, TRAF6, HCK, SRC, LYN, LCK, FGR, CDC42, YES1, RAC1, DUSP16, PAK1, DUSP8, FYN, CCM2, MAP2K3, MAP2K4, MAP3K3, MAP2K6, RALA, RIPK1, BLK, TAB1, MAPK11, MAP3K12, PAK2, DUSP1, MAPK14, PAK3
NABA_COLLAGENS	41	-0.29001	0.469955	0.109129	0.0019183	0.0261487	COL9A1, COL3A1, COL5A2, COL4A4, COL4A3, COL6A3, COL5A1, COL9A3, COL20A1, COL11A1, COL25A1, COL24A1, COL15A1, COL27A1, COL9A2, COL8A2, COL16A1, COL1A2, COL28A1, COL4A1, COL4A2, COL5A3, COL12A1, COL6A6, COL6A5, COL7A1, COL10A1, COL13A1, COL6A2, COL6A1, COL18A1, COL23A1, COL1A1, COL14A1, COL22A1, COL2A1, COL8A1, COL11A2, COL17A1, COL4A6, COL4A5
REACTOME_COLLAGEN_CHAIN_TRIMERIZATION	41	-0.29001	0.469955	0.109129	0.0019183	0.0261487	COL9A1, COL3A1, COL5A2, COL4A4, COL4A3, COL6A3, COL5A1, COL9A3, COL20A1, COL11A1, COL25A1, COL24A1, COL15A1, COL27A1, COL9A2, COL8A2, COL16A1, COL1A2, COL28A1, COL4A1, COL4A2, COL5A3, COL12A1, COL6A6, COL6A5, COL7A1, COL10A1, COL13A1, COL6A2, COL6A1, COL18A1, COL23A1, COL1A1, COL14A1, COL22A1, COL2A1, COL8A1, COL11A2, COL17A1, COL4A6, COL4A5
REACTOME_IMMUNOREGULATORY_INTERACTIONS_BETWEEN_A_LYMPHOID_AND_A_NON_LYMPHOID_CELL	57	0.291198	0.112713	0.47143	0.00193641	0.0261487	COL3A1, CD247, FCGR2B, SLAMF7, CD34, NPDC1, ITGA4, B2M, SIGLEC1, CD40, VCAM1, PILRA, COL1A2, PIANP, CLEC2D, KLRD1, KLRK1, LILRA6, LAIR1, NECTIN2, PVR, TYROBP, HCST, CD33, ITGAL, IFITM1, CD81, CDH1, ITGB1, ICAM1, ICAM5, CD3G, CD3D, CD3E, JAML, ULBP1, ITGB2, COL1A1, CD300LG, ICAM2, CD300A, CD300LB, CD300LD, CD300E, CD300LF, COL2A1, ITGB7, CD200R1, CD200, CD96, CXADR, TREM2, C3, COLEC12, CD226, COL1…
REACTOME_TRANSPORT_OF_NUCLEOSIDES_AND_FREE_PURINE_AND_PYRIMIDINE_BASES_ACROSS_THE_PLASMA_MEMBRANE	10	0.160214	0.0668187	0.251814	0.00193981	0.0261487	SLC28A2, SLC28A1, SLC25A4, ARL2BP, SLC29A3, SLC28A3, SLC29A1, SLC29A2, ARL2, SLC25A5
BIOCARTA_SODD_PATHWAY	10	0.217978	0.0902765	0.343225	0.00201355	0.0269884	CASP8, TRAF2, TNFRSF1B, TNFRSF1A, FADD, BAG4, TRADD, BIRC3, RIPK1, TNF
KEGG_CYTOSOLIC_DNA_SENSING_PATHWAY	35	0.182111	0.0723201	0.292975	0.00206255	0.027442	IKBKE, AIM2, IL1B, MAVS, POLR3F, ZBP1, POLR3K, ADAR, POLR3GL, POLR3C, NFKB1, CXCL10, POLR1D, NFKBIB, IRF3, PYCARD, IRF7, IKBKB, CASP1, IL18, POLR3B, TBK1, NFKBIA, RIPK1, POLR3G, POLR3A, RIPK3, POLR3D, POLR3H, POLR1C, STING1, RELA, IL33, CHUK, IKBKG
REACTOME_REGULATION_OF_SIGNALING_BY_CBL	22	0.182692	0.0708884	0.29234	0.00207066	0.027442	RAPGEF1, HCK, PIK3CA, LYN, PIK3R3, PIK3CD, YES1, UBC, UBA52, PIK3R2, CBL, PIK3CB, FYN, RPS27A, UBB, CRK, GRB2, SYK, PIK3R1, CRKL, VAV1, BLNK
WP_TH17_CELL_DIFFERENTIATION_PATHWAY	56	0.157258	0.0653927	0.247353	0.00215047	0.0283406	IL17A, IL17F, ZAP70, STAT1, CD247, GATA3, PRKCQ, IL2RA, RXRA, IL1B, PLCG1, RORC, NFKB1, PPP3CA, TGFBR1, JUN, JAK1, LCK, MTOR, CLOCK, CD4, TGFB1, IL21R, LAT, IKBKB, IL27RA, TYK2, CD3G, CD3D, CD3E, RORA, IFNGR1, CRY1, STAT6, IL4, PER1, NR1D1, RARA, STAT5A, STAT3, SOCS3, AHR, NFKBIA, HIF1A, FOS, HSP90AA1, IRF4, NFIL3, MAPK8, MAPK1, RUNX1, MAPK14, SMAD2, NFATC1, JAK2, FOXP3
WP_IL10_ANTIINFLAMMATORY_SIGNALING_PATHWAY	11	0.305083	0.122169	0.48623	0.00216301	0.0283474	STAT1, IL10, BLVRA, IL1A, JAK1, BLVRB, HMOX1, IL10RA, STAT2, STAT3, IL10RB
REACTOME_DECTIN_2_FAMILY	12	0.617819	0.28715	0.9451	0.00221957	0.028928	FCER1G, MUC15, MUC1, LYN, MUC3A, CLEC4D, CLEC4E, PLCG2, FYN, CLEC10A, SYK, MUCL1
REACTOME_TRAF6_MEDIATED_INDUCTION_OF_TAK1_COMPLEX_WITHIN_TLR4_COMPLEX	16	0.166997	0.0625278	0.27039	0.00224623	0.0291146	LY96, TRAF6, MAP3K7, TLR4, UBC, IRAK2, UBA52, TAB2, RPS27A, UBB, SARM1, TAB1, TICAM1, CD14, TICAM2, TAB3
WP_BURN_WOUND_HEALING	94	0.151698	0.0675653	0.234211	0.00227626	0.0293063	LY96, FN1, CXCR2, BCL2, CXCR4, GAS5, TLR5, TGFB2, VIM, FBN1, IL1A, IL1B, MMP9, SFRP2, TLR2, S100A6, S100A9, FLG, S100A11, EGF, NFKB1, FOXE1, KLF4, TNC, TLR4, HGF, FGFR3, TLR1, TLR6, KDR, CXCL1, MIAT, ELN, ACHE, HMGB1, COL1A2, NOD1, CXCL12, BAX, NOX4, SERPINH1, FGFR2, ADAM12, FGFR1, TLR3, CASP3, IL15, NOD2, MMP2, ACTA1, MMP3, ICAM1, CD3E, TAGLN, SMAD3, TLR9, MYD88, TNFAIP3, CNN2, DCN, SPARC, PFN1,…
KEGG_DRUG_METABOLISM_OTHER_ENZYMES	21	0.128378	0.0489768	0.208555	0.00228587	0.0293063	UGT1A1, UCK2, UCK1, UPP2, ITPA, UCKL1, GMPS, DPYD, CDA, GUSB, IMPDH1, NAT2, TK2, IMPDH2, UPB1, UPP1, TK1, TPMT, TYMP, UMPS, XDH
REACTOME_CASPASE_ACTIVATION_VIA_EXTRINSIC_APOPTOTIC_SIGNALLING_PATHWAY	23	0.124269	0.0463983	0.202902	0.00235059	0.0299732	LY96, CFLAR, CASP8, TRAF2, TNFSF10, TLR4, CASP9, FADD, CASP3, TRADD, DAPK2, UNC5B, DAPK3, RIPK1, UNC5A, DAPK1, APPL1, TNFRSF10B, TICAM1, CD14, TICAM2, FAS, MAGED1
REACTOME_FC_EPSILON_RECEPTOR_FCERI_SIGNALING	125	0.076058	0.027381	0.125212	0.00240914	0.0305547	PSMD1, FCER1G, FCER1A, PRKCQ, VAV2, PSMD5, PSMB7, PSMD14, PSMC3, TRAF6, RASGRP1, PSMF1, PLCG1, UBE2V1, NFATC2, PSMA7, PIK3CA, SHC1, PSMB4, PSMD4, NRAS, AHCYL1, PSMA5, VAV3, NFKB1, PPP3CA, BCL10, LYN, MAP3K7, JUN, PSMB2, PSMC2, TEC, PSMD9, UBC, LAT2, CARD11, RAC1, SEM1, CUL1, ITPR1, KRAS, ITPR2, PSMC4, RASGRP4, PSMD8, GAB2, PAK1, PSMA1, LAT, MAPK3, PSMD13, HRAS, MAP2K7, IKBKB, UBA52, PIK3R2, PSMB1…
REACTOME_DOWNSTREAM_SIGNALING_OF_ACTIVATED_FGFR4	18	-0.0954998	0.156263	0.035908	0.00242564	0.0305994	PLCG1, PIK3CA, FGF2, SHC1, NRAS, PTPN11, KRAS, HRAS, GAB1, FRS2, FGF18, GRB2, FGFR4, PIK3R1, FGF9, FRS3, SOS1, FGF1
REACTOME_SPHINGOLIPID_DE_NOVO_BIOSYNTHESIS	44	0.224473	0.0943205	0.352129	0.00248787	0.0312174	ORMDL1, SGPP2, KDSR, DEGS1, CERS6, SPTLC3, VAPB, PPM1L, SPTSSB, CERS2, SGMS2, ACER2, PLPP3, PRKD2, SPHK2, CERS3, ACER3, CERS4, CERS1, FA2H, SGPL1, PLPP2, CSNK1G2, ORMDL2, ALDH3A2, SPNS2, ORMDL3, SPHK1, PRKD1, SPTSSA, SGPP1, SPTLC2, DEGS2, SPTLC1, PLPP1, SAMD8, CERS5, ACER1, VAPA, PRKD3, ALDH3B1, ALDH3B2, OSBP, SGMS1
PID_AMB2_NEUTROPHILS_PATHWAY	37	0.17153	0.0629196	0.281203	0.0025291	0.0315669	SELP, HCK, SRC, MMP9, RAP1A, NFKB1, LYN, TLN1, LCK, FGR, PRKCZ, YES1, SELPLG, HMGB1, PLAUR, ITGAM, PLAT, MMP2, ICAM1, JAM3, THY1, MST1R, MST1, RHOA, CCN2, FYN, ITGB2, RAP1B, LRP1, MYH2, AKT1, PLAU, BLK, JAM2, AGER, TNF, ROCK1
WP_B_CELL_RECEPTOR_SIGNALING_PATHWAY	93	0.135594	0.048373	0.223671	0.0025616	0.0316621	PTPN18, CREB1, INPP5D, PTPRC, VAV2, RAPGEF1, ATF2, PLCG1, NFATC2, FOXO1, MEF2D, SHC1, ILF2, PIP5K1A, NFKB1, DAPP1, BCL10, LYN, MAP3K7, JUN, LCK, RPS6KA1, CDC42, SH3BP2, TEC, PTPN11, GTF2I, LAT2, CARD11, RAC1, BRAF, RAF1, PTPN6, GSK3A, MAP4K1, GAB2, PRKCB, HRAS, CD81, IKBKB, PIK3R2, GAB1, NFATC3, PLCG2, ETS1, CBL, MAP2K1, NCK1, FYN, MAP2K2, PIP5K1C, REL, MAPK9, CRK, CD79B, MAP2K6, GRB2, KLF11, PIK…
WP_T_CELL_MODULATION_IN_PANCREATIC_CANCER	38	0.200564	0.0793535	0.319439	0.00257208	0.0316621	CD28, CTLA4, ICOS, PDCD1, IL10, TGFB2, FAP, B2M, CD40, VTCN1, TNFRSF9, TNFRSF4, CXCL12, PVR, TGFB1, VEGFC, CCL22, CCL17, CD276, NT5E, ARG1, VSIR, HAVCR2, LGALS9, PGF, TGFB3, LGALS3, LGALS1, CD86, CD80, VEGFA, TNFSF9, CD226, VEGFB, CD274, FAS, ENTPD1, VEGFD
WP_TOLLLIKE_RECEPTOR_SIGNALING_RELATED_TO_MYD88	31	0.32304	0.121519	0.526532	0.002577	0.0316621	IKBKE, TLR5, TRAF6, TLR2, NFKB1, TLR4, TLR1, TLR6, RELB, IRF3, IRF7, TOLLIP, IKBKB, TLR3, TIRAP, TLR9, MYD88, TBK1, REL, TRAF3, IRAK4, MAPK1, TICAM1, TICAM2, RELA, CHUK, NFKB2, IRAK1, IKBKG, TLR8, TLR7
WP_CELL_INTERACTIONS_OF_THE_PANCREATIC_CANCER_MICROENVIRONMENT	21	0.299133	0.114945	0.48512	0.00259595	0.0316866	CTLA4, CXCR4, CSF1, KDR, CXCL10, CXCL12, LAG3, TGFB1, BAG3, IFITM2, NRP1, CCR2, CCR5, CCL2, CD86, CD80, VEGFA, CSF1R, FAS, CSF2RA, CXCR3
WP_TRANSCRIPTIONAL_ACTIVATION_BY_NRF2_IN_RESPONSE_TO_PHYTOCHEMICALS	15	0.167452	0.0630842	0.272168	0.00260585	0.0316866	NFE2L2, CEBPB, PIK3CA, SLC7A11, GCLM, EPHB2, AIMP2, HMOX1, NQO1, MAF, KEAP1, GCLC, GSTA2, PRKCA, MAPK8
REACTOME_NEGATIVE_REGULATION_OF_TCF_DEPENDENT_SIGNALING_BY_WNT_LIGAND_ANTAGONISTS	12	-0.104749	0.171834	0.0389573	0.00268207	0.0322931	SFRP2, DKK2, WNT4, LRP6, SFRP1, WIF1, KREMEN1, WNT3A, WNT9A, WNT5A, KREMEN2, LRP5
WP_IL17_SIGNALING_PATHWAY	29	0.245931	0.111252	0.38192	0.00268311	0.0322931	IL17A, IL17F, TRAF6, CEBPB, PIK3CA, NFKB1, MAP3K7, JAK1, IL17RE, IL17RC, IL17RA, NFKBIB, MAPK3, IKBKB, TRAF3IP2, STAT3, MAP3K14, TRAF3, AKT1, IL17RD, IL17RB, IL17D, SP1, CEBPD, MAPK1, GSK3B, RELA, JAK2, IKBKG
BIOCARTA_COMP_PATHWAY	12	0.246867	0.0982283	0.393979	0.00271192	0.0323788	C1QB, C1QC, C1QA, CFD, C7, C9, MASP1, C4B, C4A, CFB, C2, C3
WP_PROXIMAL_TUBULE_TRANSPORT	38	0.170624	0.0677024	0.271563	0.00271768	0.0323788	ATP6V1H, ATP1B1, SLC13A3, ATP1A1, ATP6V0D2, ATP6V1G1, ATP6V0B, SLC2A1, SLC4A2, SLC5A1, SLC4A4, ATP6V1F, ATP6V0A4, AQP1, ABCG2, ATP6V1B1, ATP6V1E1, SLC20A2, SLC5A5, SLC12A4, FXYD2, SLC26A6, SLC16A10, SLC5A8, SLC36A2, SLC47A1, ATP6V1D, SLC6A18, SLC6A19, SLC9A3, SLC7A7, SLC7A8, ABCC4, ATP6V1C1, ATP6V1A, ATP6V0C, SLC3A2, SLC1A1
REACTOME_NCAM1_INTERACTIONS	39	-0.197062	0.318532	0.0749622	0.00276732	0.0328045	COL9A1, COL3A1, COL5A2, COL4A4, COL4A3, COL6A3, ST8SIA4, CACNA1S, CACNB2, COL5A1, CACNB4, GFRA4, PRNP, COL9A3, ARTN, COL9A2, AGRN, CACNA1C, ST8SIA2, COL4A1, COL4A2, COL5A3, NCAM1, COL6A6, COL6A5, COL6A2, COL6A1, CACNA1G, CACNB1, CACNA1D, GFRA2, GDNF, CACNA1I, COL2A1, CACNB3, CACNA1H, NRTN, GFRA1, COL4A5
REACTOME_ACTIVATED_TAK1_MEDIATES_P38_MAPK_ACTIVATION	23	0.0987311	0.0354725	0.162318	0.00280097	0.0329399	MAPKAPK2, TRAF6, UBE2V1, RIPK2, MAP3K7, UBC, NOD1, IRAK2, UBA52, NOD2, MAPKAPK3, TAB2, UBE2N, RPS27A, MAP2K3, UBB, MAP2K6, TAB1, MAPK11, MAPK14, IRAK1, IKBKG, TAB3
BIOCARTA_IL10_PATHWAY	12	0.296009	0.111075	0.477384	0.0028199	0.0329399	STAT1, IL10, BLVRA, IL1A, JAK1, BLVRB, HMOX1, IL10RA, STAT5A, STAT3, IL10RB, TNF
WP_ERK_PATHWAY_IN_HUNTINGTONS_DISEASE	14	-0.082105	0.134734	0.0304901	0.00282063	0.0329399	CREB1, BDNF, EGF, HTT, RAF1, HRAS, MAP2K7, CASP3, EGFR, RPS6KA5, NTRK2, MAPK1, CASP7, ELK1
REACTOME_NEURONAL_SYSTEM	276	-0.0810244	0.134817	0.0282717	0.00284854	0.033102	KCNQ5, GLS, CREB1, ERBB4, PRKAG3, TUBA4A, CHRND, EPB41L5, PPFIA4, GLUL, CACNA1E, KCNK2, KCNH1, CACNB2, TUBB4B, STXBP1, CACNB4, CHRNA1, SLC1A2, LIN7C, PLCB2, PLCB1, EPB41L1, DLGAP4, SRC, KCNS1, KCNB1, KCNG1, KCNQ2, DNAJC5, GNB4, NBEA, KCNAB1, BCHE, GLRB, KCNN3, CHRNB2, PRKAB2, NRAS, KCND3, KCNA2, KCNC4, GNAI3, CAMK2D, PDLIM5, GNG5, PRKACB, UNC13B, GRIN3A, GNG10, PTPRD, PRKAA2, PTPRF, KCNQ4, GRIK3,…
REACTOME_UNBLOCKING_OF_NMDA_RECEPTORS_GLUTAMATE_BINDING_AND_ACTIVATION	13	-0.198694	0.325217	0.0728242	0.00290925	0.0336418	CAMK2D, GRIN2D, DLG2, CAMK2B, GRIA1, DLG4, CALM1, ACTN2, CAMK2G, DLG1, CAMK2A, GRIA3, DLG3
WP_STATIN_INHIBITION_OF_CHOLESTEROL_PRODUCTION	16	0.20443	0.072151	0.334157	0.00294835	0.0337805	SOAT1, ACSS1, PLTP, MTTP, ABCA1, SCARB1, APOC1, APOE, LPL, LCAT, LDLR, LRP1, HMGCR, FDFT1, SQLE, DGAT1
WP_RETT_SYNDROME_CAUSING_GENES	38	-0.080627	0.133135	0.0291316	0.00296123	0.0337805	SATB2, KDM5B, STXBP1, SCN2A, TBL1XR1, HDAC1, HTT, NCOR2, TRRAP, BRAF, CECR2, CHD4, XAB2, GNAO1, SMARCA4, IMPDH2, HIVEP2, NCOR1, GPS2, CRK, HAP1, HDAC5, TAF1B, SYNE2, EIF2B2, MEF2C, RHOBTB2, SHANK3, SCN8A, SYNGAP1, TCF4, SMARCA2, SMARCA1, MECP2, TBL1X, HDAC8, SMC1A, CDKL5
REACTOME_TOLL_LIKE_RECEPTOR_9_TLR9_CASCADE	101	0.0784643	0.0272136	0.130218	0.00296421	0.0337805	LY96, CASP8, CREB1, MAPKAPK2, TRAF2, ATF2, TRAF6, UBE2V1, ALPK1, TIFA, NFKB1, RIPK2, MAP3K7, TLR4, JUN, RPS6KA1, TNIP2, UBC, HMGB1, CUL1, NOD1, RBSN, IRAK2, USP18, NFKBIB, VRK3, MEF2A, MAPK3, IRF7, MAP2K7, IKBKB, PPP2CB, DUSP4, UBA52, N4BP1, NOD2, NLRC5, ECSIT, NLRX1, PPP2R1B, MAP2K1, PIK3R4, TLR9, DUSP7, MAPKAPK3, MYD88, TAB2, S100B, IKBIP, UBE2N, EEA1, DUSP6, PELI1, RPS27A, FBXW11, MAPK9, PPP2C…
REACTOME_COLLAGEN_BIOSYNTHESIS_AND_MODIFYING_ENZYMES	64	-0.227872	0.3775	0.0797892	0.00303231	0.0342412	COL9A1, COL3A1, COL5A2, COL4A4, COL4A3, COL6A3, COLGALT2, COL5A1, COL9A3, COL20A1, COL11A1, COL25A1, COL24A1, COL15A1, COL27A1, P3H1, COL9A2, COL8A2, COL16A1, PLOD1, ADAMTS3, PLOD3, PCOLCE, COL1A2, COL28A1, P3H3, SERPINH1, P4HA3, COL4A1, COL4A2, TLL1, COLGALT1, COL5A3, PPIB, COL12A1, PLOD2, PCOLCE2, COL6A6, COL6A5, COL7A1, CRTAP, COL10A1, P4HA1, ADAMTS14, COL13A1, COL6A2, COL6A1, COL18A1, ADAMTS2…
PID_BCR_5PATHWAY	59	0.125938	0.0440944	0.208207	0.00303366	0.0342412	PTPRC, FCGR2B, VAV2, TRAF6, CSNK2A1, PAG1, PIK3CA, SHC1, NFKB1, PPP3CA, DAPP1, BCL10, LYN, MAP3K7, CD72, JUN, CARD11, RAC1, DOK1, RAF1, PTPN6, POU2F2, NFKBIB, MAP4K1, MAPK3, HRAS, IKBKB, PLCG2, ETS1, CSK, MAP2K1, IBTK, CD79B, GRB2, NFKBIA, FOS, AKT1, SYK, RASA1, PIK3R1, MAP3K1, PPP3CB, CAMK2G, SH3BP5, MAPK8, PPP3CC, MAPK1, PDPK1, MAPK14, SOS1, MALT1, NFATC1, RELA, PTEN, BLNK, CHUK, ELK1, IKBKG, B…
KEGG_SYSTEMIC_LUPUS_ERYTHEMATOSUS	39	0.161949	0.0570167	0.267425	0.00315015	0.0353594	CD28, IL10, RO60, FCGR2B, C8G, SSB, SNRPB, CD40, H2BC21, H2AZ1, C1QB, C1QC, C1QA, H2AJ, ACTN4, TRIM21, H2AX, MACROH2A2, SNRPD3, H2AZ2, ACTN1, ACTN2, H4C9, H4C8, H2BC6, H2BC4, MACROH2A1, CTSG, C7, C9, CD86, CD80, C4B, C4A, C2, TNF, C3, SNRPD1, ACTN3
REACTOME_VISUAL_PHOTOTRANSDUCTION	62	0.0727161	0.0248189	0.119688	0.00316271	0.0353594	RDH10, SAG, GPC1, NMT2, PRKCQ, DHRS9, SDC4, LRAT, ABCA4, METAP1, LRP8, SDC3, HSPG2, DHRS3, GNB1, AGRN, NAPEPLD, PLB1, GRK4, GPC2, AKR1B10, RETSAT, RHO, APOE, RGS9BP, RLBP1, MYO7A, FNTA, LPL, CNGB1, BCO1, LDLR, BCO2, STRA6, GNB5, RBP1, RBP2, GNAT1, METAP2, LRP1, RDH16, SDR9C7, RDH5, NMT1, PRKCA, RGS9, SDC1, FNTB, RDH11, RDH12, CALM1, LRP10, GPC6, SDC2, LRP12, GPIHBP1, GUCA1B, CAMKMT, RBP4, GPC4, G…
REACTOME_ANTIVIRAL_MECHANISM_BY_IFN_STIMULATED_GENES	72	0.157821	0.0540813	0.259558	0.0032177	0.0358045	STAT1, EIF4E2, TPR, RNASEL, NUP188, NUP214, NUP35, UBE2L6, NUP160, PLCG1, RAE1, KPNA4, EIF4E, JAK1, NDC1, EIF4G3, ISG15, NUP54, OAS2, OAS3, UBC, POM121, NUP205, NUP210, EIF4E3, SEC13, USP18, NUP62, IRF3, NUP98, EIF4G2, MAPK3, UBA52, ABCE1, NUP93, NUP133, PIN1, ARIH1, NEDD4, UBA7, NUP43, RANBP2, NUP37, UBE2N, NUP107, RPS27A, UBB, EIF4A1, NUP88, TRIM25, KPNB1, KPNA2, NUP85, EIF4A3, NUP153, FLNB, UB…
BIOCARTA_RELA_PATHWAY	15	0.134309	0.0480729	0.21971	0.00326416	0.0361509	TRAF6, NFKB1, TNFRSF1B, TNFRSF1A, FADD, IKBKB, TRADD, NFKBIA, RIPK1, EP300, CREBBP, TNF, RELA, CHUK, IKBKG
BIOCARTA_DC_PATHWAY	10	0.408833	0.146914	0.668058	0.0032812	0.0361699	IL10, CD40, CD2, CD33, ANPEP, ITGAX, IL4, CD7, CD5, TLR7
REACTOME_ERYTHROPOIETIN_ACTIVATES_RAS	13	0.186576	0.0709775	0.303304	0.00338229	0.0367775	RAPGEF1, SHC1, NRAS, LYN, KRAS, HRAS, IRS2, EPOR, GRB2, CRKL, VAV1, SOS1, JAK2
PID_CERAMIDE_PATHWAY	44	0.0586302	0.0197213	0.0967875	0.00341887	0.0367775	MAP4K4, CASP8, BCL2, TRAF2, PRKRA, MADD, EGF, NFKB1, PRKCZ, PDGFA, CYCS, RAF1, BID, TNFRSF1A, BAX, SPHK2, SMPD1, MAPK3, CTSD, FADD, BAG4, ASAH1, TRADD, SMPD3, BIRC3, MAP2K1, MAP2K2, CRADD, PAWR, MAP2K4, KSR1, NFKBIA, AKT1, RIPK1, MAP3K1, PRKCD, MAPK8, MYC, MAPK1, TNF, EIF2AK2, RELA, BAD, AIFM1
REACTOME_INTERLEUKIN_3_INTERLEUKIN_5_AND_GM_CSF_SIGNALING	43	0.156158	0.0536195	0.2597	0.00342722	0.0367775	INPP5D, IL2RA, RAPGEF1, HCK, PIK3CA, SHC1, LYN, JAK1, PIK3R3, PIK3CD, YES1, TEC, PTPN11, UBC, PTPN6, GAB2, INPPL1, UBA52, PIK3R2, JAK3, PRKACA, CBL, PIK3CB, FYN, RPS27A, UBB, CRK, STAT5B, STAT5A, GRB2, SYK, PIK3R1, IL3RA, YWHAZ, CSF2RB, IL2RB, CRKL, VAV1, SOS1, JAK2, BLNK, CSF2RA, IL2RG
WP_DEVELOPMENT_AND_HETEROGENEITY_OF_THE_ILC_FAMILY	19	0.267128	0.108651	0.42715	0.00342829	0.0367775	IL17A, GATA3, IL1B, IL7, TOX, AREG, GFI1, IL15, ZBTB16, IL18, RORA, IL4, ID2, AHR, BCL11B, NFIL3, TNF, TSLP, IL33
REACTOME_NEUROTRANSMITTER_RECEPTORS_AND_POSTSYNAPTIC_SIGNAL_TRANSMISSION	139	-0.0769137	0.12782	0.0255083	0.0034394	0.0367775	CREB1, ERBB4, PRKAG3, TUBA4A, CHRND, TUBB4B, CHRNA1, LIN7C, PLCB2, PLCB1, EPB41L1, SRC, GNB4, NBEA, GLRB, CHRNB2, PRKAB2, NRAS, GNAI3, CAMK2D, GNG5, PRKACB, GRIN3A, GNG10, PRKAA2, GRIK3, RPS6KA1, GNB1, GNAI1, PRKAG2, GABRA4, PRKAB1, CAMKK2, GNB2, PRKAR1B, RAC1, GNG11, GNG12, GRIP2, CAMK1, TUBA8, KRAS, PRKCG, AP2S1, GNG8, GRIK5, AP2A1, LIN7B, GRIN2D, DLG2, PRKCB, MAPK3, HRAS, AP2A2, ARHGEF7, NRG1,…
WP_TYPE_I_COLLAGEN_SYNTHESIS_IN_THE_CONTEXT_OF_OSTEOGENESIS_IMPERFECTA	30	-0.13639	0.226738	0.0469741	0.00344163	0.0367775	TNFRSF11A, MIA3, CREB3L1, TMEM38B, P3H1, PLOD1, FZD1, COL1A2, ITPR1, LRP6, SERPINH1, IFITM5, COLGALT1, MBTPS1, PPIB, PLOD2, CRTAP, P4HA1, ADAMTS2, P4HA2, SERPINF1, COL1A1, FKBP10, P4HB, BMP1, TNFRSF11B, P3H2, LOX, LRP5, MBTPS2
REACTOME_OTHER_INTERLEUKIN_SIGNALING	18	0.186334	0.0647245	0.305599	0.00344546	0.0367775	CSF1, JAK1, CSF3R, TXLNA, IFNLR1, STX1A, PTPRZ1, CD4, IL16, STXBP2, CASP3, IL34, TYK2, VAMP2, SDC1, IL10RB, CSF1R, STX3
REACTOME_DISEASES_ASSOCIATED_WITH_N_GLYCOSYLATION_OF_PROTEINS	20	0.0815732	0.0288128	0.13379	0.00346231	0.036791	MAN1B1, CTSA, ALG14, B4GALT1, ALG2, ALG6, MOGS, ALG8, ALG11, DPAGT1, ALG9, GLB1, MPDU1, MGAT2, RFT1, ALG12, ALG1, ALG3, NEU1, ALG13
REACTOME_ECM_PROTEOGLYCANS	71	-0.21091	0.350518	0.0699341	0.00354745	0.0373841	COL9A1, COL3A1, COL5A2, FN1, COL4A4, COL4A3, COL6A3, FMOD, LAMC1, TNN, TGFB2, ITGA8, COL5A1, ITGB6, ITGAV, LRP4, MATN4, LAMA5, COL9A3, BCAN, MUSK, TNC, COL9A2, HSPG2, AGRN, IBSP, SERPINE1, COL1A2, TGFB1, ACAN, ITGAX, COL4A1, COL4A2, COMP, ITGB1, COL5A3, NCAM1, COL6A6, COL6A5, DAG1, LAMB2, ITGA9, LAMA2, LAMA4, COL6A2, COL6A1, DCN, LUM, ITGA7, SPARC, VTN, COL1A1, ITGA2B, ITGB3, MATN3, LAMB1, TGFB3,…
REACTOME_MET_ACTIVATES_PTK2_SIGNALING	30	-0.21096	0.351572	0.0717983	0.0035572	0.0373841	COL3A1, COL5A2, FN1, LAMC2, LAMC1, LAMB3, COL5A1, LAMC3, SRC, LAMA5, COL11A1, COL24A1, COL27A1, HGF, COL1A2, MET, ITGB1, COL5A3, LAMB2, LAMA2, LAMA4, COL1A1, ITGA3, LAMB1, ITGA2, PTK2, COL2A1, COL11A2, LAMA1, LAMA3
REACTOME_TRAF6_MEDIATED_IRF7_ACTIVATION	14	0.237587	0.0864729	0.385796	0.00356567	0.0373841	IKBKE, TRAF2, TANK, IFIH1, TRAF6, MAVS, SIKE1, IRF3, IRF7, TBK1, RNF135, TRIM25, EP300, CREBBP
REACTOME_INTERLEUKIN_12_SIGNALING	40	0.111663	0.0375428	0.184352	0.00367157	0.038324	SERPINB2, IL10, CAPZA1, MTAP, JAK1, CDC42, HNRNPDL, RPLP0, HNRNPA2B1, IL12RB2, HNRNPF, SNRPA1, BOLA2, TALDO1, IL12RB1, TYK2, ANXA2, GSTA2, MIF, CNN2, RAP1B, PPIA, ARF1, PITPNA, P4HB, RALA, PSME2, LCP1, PAK2, SOD1, TCP1, SOD2, HSPA9, LMNB1, AIP, CFL1, JAK2, GSTO1, PDCD4, MSN
REACTOME_INTERACTION_BETWEEN_L1_AND_ANKYRINS	26	-0.204851	0.34327	0.0691037	0.00371343	0.038526	NFASC, SPTAN1, SCN3A, SCN2A, SCN7A, SPTBN5, KCNQ2, ANK2, ACTB, SPTBN4, SCN1B, ANK1, SCN3B, SCN2B, SCN4B, SCN5A, ANK3, SPTBN1, SCN4A, ACTG1, NRCAM, SPTB, KCNQ3, SCN8A, SPTBN2, L1CAM
WP_TNFALPHA_SIGNALING_PATHWAY	86	0.0627474	0.0206204	0.10406	0.00373218	0.038526	CFLAR, CASP8, GLUL, SELE, TRAF2, TRAF1, TANK, MADD, CSNK2A1, BCL2L1, OTUD7B, NRAS, NFKB1, NSMAF, MAP3K7, JUN, CASP9, TNFRSF1B, PRKCZ, DIABLO, RAC1, CUL1, RAF1, BID, TNFRSF1A, KRAS, NFKBIB, BAX, PLK1, MAPK3, HRAS, FADD, MAP2K7, IKBKB, CASP3, TRADD, CYBA, BIRC2, BIRC3, CDC37, TAB2, TNFAIP3, MAP3K5, SMPD2, APAF1, TBK1, REL, FBXW11, MAPK9, PPP2CA, MAP2K3, MAP2K4, KSR1, CCL2, RFFL, MAP3K14, MAP3K3, MA…
REACTOME_TRANSPORT_OF_VITAMINS_NUCLEOSIDES_AND_RELATED_MOLECULES	32	0.0717984	0.0246879	0.118001	0.00373991	0.038526	SLCO4C1, SLC27A4, SLC35C1, SLC28A2, SLCO4A1, SLC33A1, SLC35A3, SLC35A1, SLC35D1, SLC5A6, SLC35B4, SLCO3A1, SLC28A1, SLCO2B1, SLC25A4, SLC27A1, ARL2BP, SLCO2A1, SLC29A3, SLC35B3, SLC28A3, SLC35D2, APOD, SLC35B2, SLC29A1, SLC27A6, SLC29A2, ARL2, SLC35A2, SLC25A5, PDZD11, SLC16A2
REACTOME_GENE_AND_PROTEIN_EXPRESSION_BY_JAK_STAT_SIGNALING_AFTER_INTERLEUKIN_12_STIMULATION	34	0.135774	0.0456404	0.224169	0.00381665	0.0391455	SERPINB2, IL10, CAPZA1, MTAP, CDC42, HNRNPDL, RPLP0, HNRNPA2B1, HNRNPF, SNRPA1, BOLA2, TALDO1, ANXA2, GSTA2, MIF, CNN2, RAP1B, PPIA, ARF1, PITPNA, RALA, PSME2, LCP1, PAK2, SOD1, TCP1, SOD2, HSPA9, LMNB1, AIP, CFL1, GSTO1, PDCD4, MSN
REACTOME_ACETYLCHOLINE_NEUROTRANSMITTER_RELEASE_CYCLE	11	0.359372	0.145576	0.575244	0.0038603	0.0394219	PPFIA4, STXBP1, UNC13B, STX1A, PPFIA3, PPFIA1, RAB3A, VAMP2, TSPOAP1, CHAT, SLC5A7
WP_IL3_SIGNALING_PATHWAY	45	0.131185	0.0438005	0.217722	0.00388751	0.0395286	INPP5D, BCL2, RAPGEF1, BCL2L1, HCK, SRC, YWHAB, SHC1, LYN, JUN, JAK1, PIK3CD, PTPN11, RAF1, PTPN6, CD69, TGFB1, GAB2, MAPK3, HRAS, PIK3R2, PRKACA, CBL, MAP2K1, ENPP3, FYN, STAT5B, STAT5A, STAT3, GRB2, YWHAQ, FOS, AKT1, SYK, PIK3R1, IL3RA, MAPK8, CSF2RB, MAPK1, CRKL, CD86, VAV1, SOS1, BAD, JAK2
REACTOME_KERATINIZATION	144	1.20534	0.387725	2.00715	0.00394383	0.0399292	PKP1, PKP4, TGM5, SPRR2B, SPRR2D, SPRR2E, SPRR2F, SPRR2G, SPRR1B, SPRR1A, IVL, LCE6A, LCE1B, LCE1C, LCE1D, LCE1E, LCE1F, LCE3A, LCE3B, LCE3C, LCE3D, LCE3E, FLG, RPTN, TCHH, KAZN, CAPNS1, KLK14, KLK13, KLK12, KLK8, KLK5, PCSK6, FURIN, PRSS8, PKP3, KRTAP5-2, KRTAP5-3, KRTAP5-5, KRTAP5-1, KRTAP5-4, ST14, PERP, KRTAP12-1, KRTAP10-4, KRTAP10-10, CASP14, KRT24, KRT25, KRT26, KRT27, KRT28, KRT10, KRT20,…
REACTOME_SIGNALING_BY_CSF1_M_CSF_IN_MYELOID_CELLS	31	0.143598	0.0478993	0.240233	0.00400483	0.0403735	STAT1, INPP5D, HCK, SRC, PIK3CA, SHC1, CSF1, LYN, YES1, PTPN11, UBC, KRAS, GAB2, INPPL1, UBA52, IL34, PLCG2, CBL, PIK3CB, FYN, THOC5, RPS27A, UBB, STAT3, GRB2, PIK3CG, PIK3R1, GRAP2, SOS1, CSF1R, GAB3
PID_EPHA_FWDPATHWAY	31	0.160784	0.0539057	0.268708	0.00403092	0.0404636	EPHA4, NGEF, VAV2, HCK, SRC, PLCG1, EFNA1, EFNA3, VAV3, LYN, EPHA7, LCK, FGR, EPHA2, CDK5, YES1, EPHA1, CBL, RHOA, FYN, EFNA2, PIK3R5, PIK3R6, ARHGEF15, CRK, PIK3CG, BLK, CRKL, EPHA3, EFNA5, ROCK1
WP_TCELL_RECEPTOR_SIGNALING_PATHWAY	85	0.146162	0.0524388	0.240801	0.00419966	0.0419788	IL17A, ZAP70, CD28, ICOS, CREB1, CD247, GATA3, PRKCQ, IL15RA, VIM, ATF2, TRAF6, IL1A, IL1B, PLCG1, NFATC2, SHC1, VAV3, NFKB1, BCL10, RIPK2, MAP3K7, JUN, LCK, CDC42, TNFRSF9, PTPN11, SH2B3, CARD11, ITPR1, RAF1, CD4, TGFB1, MAP4K1, GAB2, PAK1, LAT, MAPK3, HRAS, IKBKB, PIK3R2, CBL, CD3G, CD3D, CD3E, PSTPIP1, MAP2K1, NCK1, CCR5, FYN, MAP2K2, DBNL, REL, LCP2, ITK, MAPK9, CRK, SKAP1, MAP3K14, GRB2, NFK…
WP_COVID19_ADVERSE_OUTCOME_PATHWAY	11	0.434235	0.1485	0.717208	0.00425456	0.0423482	IL10, IL2RA, IL1B, IL7, CXCL10, AGT, CCL2, CCL3, TMPRSS2, TNF, ACE2
REACTOME_SUMOYLATION_OF_TRANSCRIPTION_COFACTORS	41	-0.0500835	0.0837623	0.0160747	0.00429296	0.0425275	NCOA2, SUMO1, RNF2, BMI1, PHC3, PIAS3, TOPORS, SCMH1, PHC2, PARK7, CTBP1, PPARGC1A, NCOR2, HIPK2, PHC1, TRIM28, ING2, SIN3A, PIAS1, SUMO3, PIAS4, NPM1, PCGF2, DDX5, SUMO2, CBX2, CBX8, CBX4, NCOA1, DDX17, MRTFA, EP300, CREBBP, NRIP1, UBE2I, DAXX, RING1, SAFB, MBD1, PIAS2, UHRF2
REACTOME_SARS_COV_1_INFECTION	133	0.0995958	0.031657	0.168201	0.00430863	0.0425275	SUMO1, IKBKE, ST6GALNAC4, NMI, IFIH1, PPIG, TRAF6, MAVS, FKBP1A, BCL2L1, CHMP4B, ITCH, YWHAB, RPS21, CHMP4C, RPS27, SIKE1, NFKB1, ST6GALNAC3, RPS20, VCP, RPS6, RPS8, ST3GAL3, PPIH, SFN, RCAN3, YWHAH, UBC, YWHAG, SERPINE1, CAV1, CHMP3, MOGS, VHL, IRAK2, RPS9, RPS5, CHMP2A, RPS19, GSK3A, RPS16, IRF3, RPS11, RPS17, UVRAG, RPS3, RPS13, RPS15A, PYCARD, UBA52, BST2, ST3GAL2, MAP1LC3B, CASP1, PRKCSH, ST…
REACTOME_SIGNALING_BY_PDGF	57	-0.116966	0.19763	0.0370843	0.00449921	0.0439251	COL9A1, NCK2, COL3A1, COL5A2, STAT1, COL4A4, COL4A3, COL6A3, COL5A1, RAPGEF1, THBS1, SRC, PLCG1, COL9A3, PIK3CA, PDGFC, THBS3, NRAS, COL9A2, PTPN12, PDGFRA, SPP1, PTPN11, PDGFA, KRAS, FURIN, HRAS, COL4A1, COL4A2, PLAT, PIK3R2, BCAR1, PDGFD, COL5A3, PIK3CB, NCK1, COL6A6, COL6A5, COL6A2, COL6A1, STAT6, CRK, GRB7, STAT5B, STAT5A, STAT3, GRB2, RASA1, THBS4, PIK3R1, PDGFB, COL2A1, CRKL, THBS2, SOS1, P…
WP_COMPLEMENT_ACTIVATION	15	0.226432	0.0788875	0.374741	0.00450503	0.0439251	CD55, C8G, C1QB, C1QC, C1QA, CFD, C7, C9, MASP1, C4B, C4A, CFB, C2, C3, CFP
PID_INTEGRIN2_PATHWAY	19	0.215906	0.0697305	0.361326	0.00450609	0.0439251	F11R, VCAM1, CCN1, SPON2, PLAUR, ITGAL, ITGAM, ITGAX, F10, PLAT, ICAM1, JAM3, THY1, ITGB2, GP1BA, ICAM2, TGFBI, PLAU, C3
REACTOME_NCAM_SIGNALING_FOR_NEURITE_OUT_GROWTH	59	-0.129848	0.215886	0.0429687	0.00460385	0.0446934	COL9A1, COL3A1, COL5A2, CREB1, COL4A4, COL4A3, COL6A3, ST8SIA4, CACNA1S, CACNB2, COL5A1, SPTAN1, CACNB4, SPTBN5, PTPRA, GFRA4, PRNP, SRC, COL9A3, NRAS, ARTN, COL9A2, AGRN, CACNA1C, KRAS, SPTBN4, ST8SIA2, MAPK3, HRAS, COL4A1, COL4A2, FGFR1, COL5A3, NCAM1, COL6A6, COL6A5, FYN, COL6A2, COL6A1, SPTBN1, CACNA1G, CACNB1, GRB2, SPTB, RPS6KA5, CACNA1D, GFRA2, GDNF, PTK2, CACNA1I, COL2A1, CACNB3, MAPK1, C…
REACTOME_PI_3K_CASCADE_FGFR4	11	-0.128524	0.214925	0.041834	0.0047017	0.0454562	PIK3CA, FGF2, PTPN11, GAB1, FRS2, FGF18, GRB2, FGFR4, PIK3R1, FGF9, FGF1
KEGG_LYSOSOME	113	0.11808	0.0371918	0.199761	0.00478056	0.04603	ATP6V1H, SLC11A1, AP1S3, CTSE, ABCA2, ACP2, AP4E1, CTSA, CTSZ, MFSD8, CTSO, CTSK, CTSS, AP4B1, SORT1, MANBA, ATP6V0D2, CLTA, ATP6V0B, PPT1, LAPTM5, FUCA1, PSAPL1, SCARB2, IDUA, ABCB9, ATP6V0A2, GUSB, AP1S1, AP4M1, ATP6V0A4, SUMF1, M6PR, NAPSA, AP3S2, CTSC, SMPD1, TPP1, GGA2, CLN3, CTSD, MCOLN1, LAMP1, AP3M2, HGSNAT, ASAH1, AGA, AP1M1, MAN2B1, ATP6V0D1, PLA2G15, AP1G1, GALNS, AP1M2, ACP5, HEXA, SL…
BIOCARTA_CCR5_PATHWAY	16	0.162614	0.0570491	0.26615	0.0048649	0.0465659	CXCR4, PLCG1, JUN, CXCL12, CALM3, PRKCB, CCR5, CCL2, PRKCA, FOS, CALM1, MAPK8, PTK2B, MAPK14, CALM2, GNAQ
REACTOME_SYNAPTIC_ADHESION_LIKE_MOLECULES	15	-0.120523	0.202131	0.0384907	0.00487617	0.0465659	PTPRD, PTPRF, LRFN1, LRFN3, GRIN2D, GRIA1, DLG4, FLOT2, DLG1, FLOT1, PTPRS, LRFN4, RTN3, GRIA3, DLG3
REACTOME_IRON_UPTAKE_AND_TRANSPORT	51	0.0761916	0.0240101	0.128884	0.00489544	0.0465659	ATP6V1H, SLC40A1, STEAP3, FLVCR1, LCN2, CYBRD1, CP, ATP6V0D2, ACO1, ATP6V1G1, ATP6V0B, STEAP2, FBXL5, ATP6V0A2, UBC, TFR2, ATP6V1F, ATP6V0A4, CUL1, ATP6V0E2, ABCG2, ATP6V1B1, ATP6V1E1, GLRX3, MCOLN1, ATP6V1B2, UBA52, HMOX1, ATP6V0D1, IREB2, CAND1, RPS27A, UBB, SLC46A1, ATP6V0A1, ATP6V1C2, ATP6V1D, HFE, SLC22A17, NEDD8, ATP6V1C1, SLC11A2, HMOX2, TFRC, ATP6V1A, ATP6V0C, ATP6V1G2, TCIRG1, FTH1, ATP6…
PID_CMYB_PATHWAY	71	0.0649786	0.0202241	0.110172	0.00504303	0.0477772	BCL2, PTGS2, COPA, CD34, GATA3, SPI1, ADA, CEBPB, PPID, PIAS3, NRAS, GSTM1, CASP6, LEF1, PPP3CA, H2AZ1, MAP3K7, CLTA, SKI, CDK6, KIT, MAD1L1, COL1A2, TFEC, SND1, HIPK2, MAT2A, CD4, CDKN1B, KRAS, TRIM28, CEBPA, MYOD1, ANPEP, IQGAP1, HRAS, CCND1, TOM1, ZFHX3, MAF, ZFPM1, BIRC3, ETS1, HSPA8, SIN3A, TAB2, MYB, SLC25A3, ATP2B1, MYF6, YEATS4, ADORA2B, NCOR1, NLK, CBX4, CCNB1, MYC, TAB1, EP300, SP1, CRE…
REACTOME_IKK_COMPLEX_RECRUITMENT_MEDIATED_BY_RIP1	22	0.139213	0.04311	0.233462	0.00513715	0.048474	LY96, TRAF6, UBE2V1, UBE2D3, TLR4, UBC, IKBKB, UBA52, BIRC2, BIRC3, UBE2D1, UBE2N, RPS27A, UBB, SARM1, RIPK1, RIPK3, TICAM1, CD14, TICAM2, CHUK, IKBKG
WP_MTHFR_DEFICIENCY	21	-0.125575	0.205067	0.0453078	0.00515769	0.048474	HNMT, EHMT1, DNMT3B, CASP9, MTHFR, CYCS, GRIN2D, CASP3, DNMT1, CHPT1, MARS1, PEMT, DNMT3A, BHMT, CHDH, COMT, PCYT1A, EHMT2, NDUFAF7, ALDH7A1, CHKA
REACTOME_MET_PROMOTES_CELL_MOTILITY	41	-0.151298	0.255323	0.0462538	0.00524448	0.0490942	COL3A1, COL5A2, FN1, LAMC2, LAMC1, LAMB3, COL5A1, RAPGEF1, LAMC3, SRC, LAMA5, RAP1A, COL11A1, COL24A1, COL27A1, DOCK7, HGF, RAC1, COL1A2, MET, GAB1, ITGB1, COL5A3, LAMB2, LAMA2, LAMA4, RAP1B, TNS3, CRK, COL1A1, ITGA3, TNS4, GRB2, LAMB1, ITGA2, PTK2, COL2A1, CRKL, COL11A2, LAMA1, LAMA3
REACTOME_TNFR1_INDUCED_NFKAPPAB_SIGNALING_PATHWAY	33	0.0655652	0.0202338	0.111341	0.00528503	0.0491948	USP21, OPTN, OTUD1, TRAF2, TRAF1, RBCK1, SPATA2, OTUD7B, MAP3K7, UBC, TNFRSF1A, IKBKB, UBA52, CYLD, TRADD, BIRC2, BIRC3, USP2, USP4, TAB2, TNFAIP3, RPS27A, RACK1, UBB, RIPK1, RNF31, SHARPIN, TAB1, TNF, CHUK, XIAP, IKBKG, TAB3
REACTOME_COLLAGEN_FORMATION	83	-0.191411	0.32411	0.0580231	0.00529693	0.0491948	COL9A1, DST, COL3A1, COL5A2, COL4A4, COL4A3, COL6A3, COLGALT2, LAMC2, LAMB3, COL5A1, ITGA6, MMP9, COL9A3, COL20A1, CTSS, COL11A1, COL25A1, COL24A1, COL15A1, COL27A1, P3H1, COL9A2, COL8A2, COL16A1, PLOD1, ADAMTS3, PLOD3, PCOLCE, COL1A2, COL28A1, LOXL3, P3H3, SERPINH1, P4HA3, CD151, COL4A1, COL4A2, TLL1, COLGALT1, MMP3, COL5A3, LOXL1, PPIB, COL12A1, PLOD2, PCOLCE2, COL6A6, COL6A5, COL7A1, CRTAP, CO…
REACTOME_METABOLISM_OF_PORPHYRINS	22	0.152573	0.0497481	0.253419	0.00533037	0.0493111	UGT1A1, PPOX, FLVCR1, BLVRA, ALAD, UROD, ALB, ABCG2, BLVRB, SLCO2B1, UROS, HMOX1, HMBS, GSTA1, ALAS1, COX10, HMOX2, ABCC1, CPOX, FECH, COX15, ALAS2
