# Supplementary material for: The interferon-rich skin environment regulates Langerhans cell ADAM17 to promote photosensitivity in lupus
Source: eLife. 2024 Jun 11;13:e85914. doi: 10.7554/eLife.85914 (PMC11213570; doi:10.7554/eLife.85914)
Supplement: Supplementary file 9. [file elife-85914-supp9.xlsx]

## Sheet: Mouse Gene Sets
Gene Symbol	Gene Entrez ID	Gene Set
Clptm1l	218335	Plasma Cell
Creld2	76737	Plasma Cell
Derl3	70377	Plasma Cell
Dnajc3	100037258	Plasma Cell
Ell2	192657	Plasma Cell
Fkbp11	66120	Plasma Cell
Fkbp2	14227	Plasma Cell
Hsp90b1	22027	Plasma Cell
Manea	242362	Plasma Cell
Manf	74840	Plasma Cell
Mzb1	69816	Plasma Cell
Pdia4	12304	Plasma Cell
Plpp5	71910	Plasma Cell
Prdx4	53381	Plasma Cell
Sdc1	20969	Plasma Cell
Sdf2l1	76872	Plasma Cell
Sel1l	20338	Plasma Cell
Ssr4	20832	Plasma Cell
Tnfrsf17	21935	Plasma Cell
Tram2	170829	Plasma Cell
Xbp1	22433	Plasma Cell
Bcl11b	58208	T cell
Camk4	12326	T cell
Cd3d	12500	T cell
Cd3e	12501	T cell
Cd3g	12502	T cell
Cd6	12511	T cell
Itk	16428	T cell
Lck	16818	T cell
Lef1	16842	T cell
Ptcra	19208	T cell
Satb1	20230	T cell
Sit1	54390	T cell
Tcf7	21414	T cell
Themis	210757	T cell
Tnfrsf18	21936	T cell
Tnfsf11	21943	T cell
Tox	252838	T cell
Txk	22165	T cell
Zbtb7b	22724	T cell
Zeb1	21417	T cell
Zfp683	100503878	T cell
Aif1	11629	Myeloid Cell
Aoah	27052	Myeloid Cell
Arg1	11846	Myeloid Cell
Batf2	74481	Myeloid Cell
Bmx	12169	Myeloid Cell
Bpi	329547	Myeloid Cell
Cd300lf	246746	Myeloid Cell
Cd33	12489	Myeloid Cell
Cd68	12514	Myeloid Cell
Clec12a	232413	Myeloid Cell
Clec4a2	26888	Myeloid Cell
Clec4b1	69810	Myeloid Cell
Clec4d	17474	Myeloid Cell
Clec4e	56619	Myeloid Cell
Clec4g	75863	Myeloid Cell
Clec4n	56620	Myeloid Cell
Clec5a	23845	Myeloid Cell
Clec7a	56644	Myeloid Cell
Csf2ra	12982	Myeloid Cell
Csf2rb	12983	Myeloid Cell
Csf3r	12986	Myeloid Cell
Cst3	13010	Myeloid Cell
Cxcl9	17329	Myeloid Cell
Cyba	13057	Myeloid Cell
Cybb	13058	Myeloid Cell
Fcer1a	14125	Myeloid Cell
Fcgr1	14129	Myeloid Cell
Fcgr3	14131	Myeloid Cell
Fcgr4	246256	Myeloid Cell
Ffar2	233079	Myeloid Cell
Fgr	14191	Myeloid Cell
Igsf6	80719	Myeloid Cell
Il1rn	16181	Myeloid Cell
Lilrb4a	14728	Myeloid Cell
Lyz2	17105	Myeloid Cell
Mpeg1	17476	Myeloid Cell
Ms4a6d	68774	Myeloid Cell
Nlrp12	378425	Myeloid Cell
Nlrp3	216799	Myeloid Cell
Olr1	108078	Myeloid Cell
P2rx5	94045	Myeloid Cell
Pilra	231805	Myeloid Cell
Pla2g2d	18782	Myeloid Cell
S100a9	20202	Myeloid Cell
Scarb1	20778	Myeloid Cell
Serping1	12258	Myeloid Cell
Slamf8	74748	Myeloid Cell
Trem1	58217	Myeloid Cell
Treml4	224840	Myeloid Cell
Vsig4	278180	Myeloid Cell
Amer2	72125	Neutrophil
Ankrd22	52024	Neutrophil
Arg2	11847	Neutrophil
Camp	12796	Neutrophil
Cd177	68891	Neutrophil
Ceacam10	26366	Neutrophil
Chil1	12654	Neutrophil
Clec5a	23845	Neutrophil
Csf3r	12986	Neutrophil
Dhrs9	241452	Neutrophil
Gm9949	225609	Neutrophil
Grina	66168	Neutrophil
Il1f9	215257	Neutrophil
Mmp8	17394	Neutrophil
Mrgpra2a	668727	Neutrophil
Mrgpra2b	235712	Neutrophil
Olfm4	380924	Neutrophil
Pglyrp1	21946	Neutrophil
Pram1	378460	Neutrophil
Prtn3	19152	Neutrophil
S100a7a	381493	Neutrophil
S100a8	20201	Neutrophil
Sfxn5	94282	Neutrophil
Sgms2	74442	Neutrophil
Slc22a20	381203	Neutrophil
Stfa2l1	268885	Neutrophil
Bst2	69550	pDC
Cd300c	387565	pDC
Klra17	170733	pDC
Siglech	233274	pDC
Tcf4	21413	pDC
CD207	246278	Langerhans cell
H2-Aa	14960	Langerhans cell
H2-Ab1	14961	Langerhans cell
H2-Eb1	14969	Langerhans cell
HS-Dma	14998	Langerhans cell
H2-M2	14990	Langerhans cell
Anxa8	11752	Keratinocyte
Cblc	80794	Keratinocyte
Cldn1	12737	Keratinocyte
Cldn8	54420	Keratinocyte
Crb3	224912	Keratinocyte
Dab2ip	69601	Keratinocyte
Dapl1	76747	Keratinocyte
Dnase1l2	66705	Keratinocyte
Dsc3	13507	Keratinocyte
Dsg2	13511	Keratinocyte
Dsg3	13512	Keratinocyte
Dsg4	16769	Keratinocyte
Gjb3	14620	Keratinocyte
Irf6	54139	Keratinocyte
Irx4	50916	Keratinocyte
Jup	16480	Keratinocyte
Klk10	69540	Keratinocyte
Klk8	259277	Keratinocyte
Krt1	16678	Keratinocyte
Krt10	16661	Keratinocyte
Krt14	16664	Keratinocyte
Krt15	16665	Keratinocyte
Krt19	16669	Keratinocyte
Krt2	16681	Keratinocyte
Krt5	110308	Keratinocyte
Krt6a	16687	Keratinocyte
Krtdap	64661	Keratinocyte
Lad1	16763	Keratinocyte
Lama3	16774	Keratinocyte
Lgals7	16858	Keratinocyte
Lgr6	329252	Keratinocyte
Mmp13	17386	Keratinocyte
Nos1	18125	Keratinocyte
Nrarp	67122	Keratinocyte
P3h2	210530	Keratinocyte
Padi1	18599	Keratinocyte
Pcsk5	18552	Keratinocyte
Pkp3	56460	Keratinocyte
Rhbdl2	230726	Keratinocyte
Saa2	20209	Keratinocyte
Serpinb13	241196	Keratinocyte
Serpinb3a	20248	Keratinocyte
Serpinb5	20724	Keratinocyte
Sik1	17691	Keratinocyte
Slc39a2	214922	Keratinocyte
Slc6a20a	102680	Keratinocyte
Sox7	20680	Keratinocyte
Stx19	68159	Keratinocyte
Tgm1	21816	Keratinocyte
Tmprss11e	243084	Keratinocyte
Tmprss4	214523	Keratinocyte
Trim29	72169	Keratinocyte
Trp63	22061	Keratinocyte
Upk3b	100647	Keratinocyte
Vwa2	240675	Keratinocyte
Eif2ak2	19106	IFN
Gbp2	14469	IFN
Gbp3	55932	IFN
Herc6	67138	IFN
Ifi27	52668	IFN
Ifi30	65972	IFN
Ifi35	70110	IFN
Ifi44	99899	IFN
Ifi44l	15061	IFN
Ifit1	15957	IFN
Ifit2	15958	IFN
Ifit3	15959	IFN
Ifitm1	68713	IFN
Ifitm2	80876	IFN
Ifitm3	66141	IFN
Isg15	100038882	IFN
Isg20	57444	IFN
Mx1	17857	IFN
Mx2	17858	IFN
Oas1a	246730	IFN
Oas2	246728	IFN
Oas3	246727	IFN
Oasl1	231655	IFN
Rsad2	58185	IFN
Sp100	20684	IFN
Sp110	109032	IFN
Il18	16173	IL1 Cytokines
Il1a	16175	IL1 Cytokines
Il1b	16176	IL1 Cytokines
Il17a	16171	IL17 Complex
Il17f	257630	IL17 Complex
Il17ra	16172	IL17 Complex
Il17rc	171095	IL17 Complex
Traf3	22031	IL17 Complex
Traf3ip2	103213	IL17 Complex
Il21	60505	IL21 Complex
Il21r	60504	IL21 Complex
Il2rg	16186	IL21 Complex
Bcl2l10	12049	TNF Induced Genes
Ccl5	20304	TNF Induced Genes
Cd6	12511	TNF Induced Genes
Cd68	12514	TNF Induced Genes
Cp	12870	TNF Induced Genes
Csf2	12981	TNF Induced Genes
Csf3	12985	TNF Induced Genes
Dcn	13179	TNF Induced Genes
Gbp2	14469	TNF Induced Genes
Gdf15	23886	TNF Induced Genes
Gstt1	14871	TNF Induced Genes
H2-D1	14964	TNF Induced Genes
H2-K2	630499	TNF Induced Genes
H2-T23	15040	TNF Induced Genes
Hp	15439	TNF Induced Genes
Igdcc3	19289	TNF Induced Genes
Il6	16193	TNF Induced Genes
Jun	16476	TNF Induced Genes
Krt35	53617	TNF Induced Genes
Limk1	16885	TNF Induced Genes
Madcam1	17123	TNF Induced Genes
Mmp13	17386	TNF Induced Genes
Mmp3	17392	TNF Induced Genes
Nfkbia	18035	TNF Induced Genes
Notch3	18131	TNF Induced Genes
Saa3	20210	TNF Induced Genes
Sele	20339	TNF Induced Genes
Selp	20344	TNF Induced Genes
Serpina3n	20716	TNF Induced Genes
Sod2	20656	TNF Induced Genes
Tap2	21355	TNF Induced Genes
Tnfaip3	21929	TNF Induced Genes
Traf1	22029	TNF Induced Genes
Vcam1	22329	TNF Induced Genes
Yy1	22632	TNF Induced Genes
Acsl1	14081	IFNA2 Signature
Adar	56417	IFNA2 Signature
Agt	11606	IFNA2 Signature
Aim2	383619	IFNA2 Signature
Akap2	11641	IFNA2 Signature
Apobec3	80287	IFNA2 Signature
Atf3	11910	IFNA2 Signature
Atf5	107503	IFNA2 Signature
Bag1	12017	IFNA2 Signature
Bard1	12021	IFNA2 Signature
Bcl7b	12054	IFNA2 Signature
Blvra	109778	IFNA2 Signature
Brca1	12189	IFNA2 Signature
Brca2	12190	IFNA2 Signature
Bst2	69550	IFNA2 Signature
Bub1	12235	IFNA2 Signature
C2	12263	IFNA2 Signature
Cacna1a	12286	IFNA2 Signature
Cad	69719	IFNA2 Signature
Camk2a	12322	IFNA2 Signature
Casp1	12362	IFNA2 Signature
Cbr1	12408	IFNA2 Signature
Cbwd1	226043	IFNA2 Signature
Ccl2	20296	IFNA2 Signature
Ccl7	20306	IFNA2 Signature
Ccna1	12427	IFNA2 Signature
Ccnd2	12444	IFNA2 Signature
Cd2ap	12488	IFNA2 Signature
Cd38	12494	IFNA2 Signature
Cd4	12504	IFNA2 Signature
Cd69	12515	IFNA2 Signature
Cdc42ep1	104445	IFNA2 Signature
Cdk4	12567	IFNA2 Signature
Cdkn1a	12575	IFNA2 Signature
Cfb	14962	IFNA2 Signature
Ch25h	12642	IFNA2 Signature
Chka	12660	IFNA2 Signature
Cntn6	53870	IFNA2 Signature
Col3a1	12825	IFNA2 Signature
Cxcl10	15945	IFNA2 Signature
Cxcl11	56066	IFNA2 Signature
Cxcl9	17329	IFNA2 Signature
Cxcr2	12765	IFNA2 Signature
Cyp2j6	13110	IFNA2 Signature
Dab2	13132	IFNA2 Signature
Defb1	13214	IFNA2 Signature
Dll1	13388	IFNA2 Signature
Dsc2	13506	IFNA2 Signature
Dusp5	240672	IFNA2 Signature
Dusp7	235584	IFNA2 Signature
Dynlt1f	100040531	IFNA2 Signature
Dysf	26903	IFNA2 Signature
Ece1	230857	IFNA2 Signature
Edn1	13614	IFNA2 Signature
Eif2ak2	19106	IFNA2 Signature
Eif2b1	209354	IFNA2 Signature
Eif4enif1	74203	IFNA2 Signature
Enpp2	18606	IFNA2 Signature
Epb4.1	269587	IFNA2 Signature
Etv4	18612	IFNA2 Signature
F8	14069	IFNA2 Signature
Faf1	14084	IFNA2 Signature
Fas	14102	IFNA2 Signature
Fasl	14103	IFNA2 Signature
Fgf1	14164	IFNA2 Signature
Flna	192176	IFNA2 Signature
Foxo1	56458	IFNA2 Signature
Ftl1	14325	IFNA2 Signature
Fut4	14345	IFNA2 Signature
Gadd45b	17873	IFNA2 Signature
Gbp2	14469	IFNA2 Signature
Gch1	14528	IFNA2 Signature
Gcnt1	14537	IFNA2 Signature
Glb1	12091	IFNA2 Signature
Gls	14660	IFNA2 Signature
Gm14446	667373	IFNA2 Signature
Gm17296	212728	IFNA2 Signature
Gmpr	66355	IFNA2 Signature
Gpr161	240888	IFNA2 Signature
Guk1	14923	IFNA2 Signature
H2-Eb1	14969	IFNA2 Signature
H2-Oa	15001	IFNA2 Signature
Hbb-y	15135	IFNA2 Signature
Hist2h2aa1	15267	IFNA2 Signature
Hs6st1	50785	IFNA2 Signature
Hsp90aa1	15519	IFNA2 Signature
Ido1	15930	IFNA2 Signature
Ifi204	15951	IFNA2 Signature
Ifi27	52668	IFNA2 Signature
Ifi27l2a	76933	IFNA2 Signature
Ifi27l2b	217845	IFNA2 Signature
Ifi35	70110	IFNA2 Signature
Ifi44	99899	IFNA2 Signature
Ifi44l	15061	IFNA2 Signature
Ifitm1	68713	IFNA2 Signature
Ifitm2	80876	IFNA2 Signature
Ifitm3	66141	IFNA2 Signature
Ifng	15978	IFNA2 Signature
Ifrd1	15982	IFNA2 Signature
Ikbkg	16151	IFNA2 Signature
Il15	16168	IFNA2 Signature
Il15ra	16169	IFNA2 Signature
Il1rn	16181	IFNA2 Signature
Il6	16193	IFNA2 Signature
Inadl	12695	IFNA2 Signature
Inppl1	16332	IFNA2 Signature
Irf2	16363	IFNA2 Signature
Irf7	54123	IFNA2 Signature
Isg15	100038882	IFNA2 Signature
Isg20	57444	IFNA2 Signature
Itih2	16425	IFNA2 Signature
Jak2	16452	IFNA2 Signature
Jup	16480	IFNA2 Signature
Kcna3	16491	IFNA2 Signature
Kdelr2	66913	IFNA2 Signature
Kif20b	240641	IFNA2 Signature
Klf6	23849	IFNA2 Signature
Kpnb1	16211	IFNA2 Signature
Krt8	16691	IFNA2 Signature
Lag3	16768	IFNA2 Signature
Lamp3	239739	IFNA2 Signature
Lap3	66988	IFNA2 Signature
Lepr	16847	IFNA2 Signature
Lgals2	107753	IFNA2 Signature
Lgals3bp	19039	IFNA2 Signature
Lgals9	16859	IFNA2 Signature
Lgmn	19141	IFNA2 Signature
Lmnb1	16906	IFNA2 Signature
Lmo2	16909	IFNA2 Signature
LOC102638047	102638047	IFNA2 Signature
Ly6e	17069	IFNA2 Signature
Map2k5	23938	IFNA2 Signature
Mcl1	17210	IFNA2 Signature
Med1	19014	IFNA2 Signature
Mgll	23945	IFNA2 Signature
Mmp16	17389	IFNA2 Signature
Mrps15	66407	IFNA2 Signature
Msr1	20288	IFNA2 Signature
Mx1	17857	IFNA2 Signature
Mx2	17858	IFNA2 Signature
Myd88	17874	IFNA2 Signature
Nampt	59027	IFNA2 Signature
Nfe2l3	18025	IFNA2 Signature
Nktr	18087	IFNA2 Signature
Nmi	64685	IFNA2 Signature
Nr3c1	14815	IFNA2 Signature
Nub1	53312	IFNA2 Signature
Nupr1	56312	IFNA2 Signature
Oas1g	23960	IFNA2 Signature
Oas2	246728	IFNA2 Signature
Oas3	246727	IFNA2 Signature
Osbpl1a	64291	IFNA2 Signature
Pdgfb	18591	IFNA2 Signature
Pdgfrl	68797	IFNA2 Signature
Pggt1b	225467	IFNA2 Signature
Pkd2	18764	IFNA2 Signature
Plscr1	22038	IFNA2 Signature
Pmaip1	58801	IFNA2 Signature
Pml	18854	IFNA2 Signature
Prkra	23992	IFNA2 Signature
Psmb9	16912	IFNA2 Signature
Ptch1	19206	IFNA2 Signature
Rbck1	24105	IFNA2 Signature
Ret	19713	IFNA2 Signature
Rgs1	50778	IFNA2 Signature
Rgs6	50779	IFNA2 Signature
Rps9	76846	IFNA2 Signature
Rtp4	67775	IFNA2 Signature
Sat1	20229	IFNA2 Signature
Scarb2	12492	IFNA2 Signature
Serping1	12258	IFNA2 Signature
Sit1	54390	IFNA2 Signature
Slamf1	27218	IFNA2 Signature
Socs1	12703	IFNA2 Signature
Sp100	20684	IFNA2 Signature
Sp140	434484	IFNA2 Signature
Spib	272382	IFNA2 Signature
St3gal5	20454	IFNA2 Signature
Stap1	56792	IFNA2 Signature
Stat1	20846	IFNA2 Signature
Stat2	20847	IFNA2 Signature
Stx11	74732	IFNA2 Signature
Supt3	109115	IFNA2 Signature
Syn2	20965	IFNA2 Signature
Taf5l	102162	IFNA2 Signature
Tap1	21354	IFNA2 Signature
Tap2	21355	IFNA2 Signature
Tcn2	21452	IFNA2 Signature
Tfdp2	211586	IFNA2 Signature
Tgm1	21816	IFNA2 Signature
Tlr3	142980	IFNA2 Signature
Tlr7	170743	IFNA2 Signature
Tnfrsf11a	21934	IFNA2 Signature
Tnfsf10	22035	IFNA2 Signature
Tnk2	51789	IFNA2 Signature
Tor1b	30934	IFNA2 Signature
Tra2b	20462	IFNA2 Signature
Trim21	20821	IFNA2 Signature
Trim26	22670	IFNA2 Signature
Trim34a	94094	IFNA2 Signature
Trim38	214158	IFNA2 Signature
Uba7	74153	IFNA2 Signature
Ube2l6	56791	IFNA2 Signature
Ube2s	77891	IFNA2 Signature
Ube3a	22215	IFNA2 Signature
Unc93b1	54445	IFNA2 Signature
Usp18	24110	IFNA2 Signature
Vamp5	53620	IFNA2 Signature
Wars	22375	IFNA2 Signature
Wt1	22431	IFNA2 Signature
Xaf1	327959	IFNA2 Signature
Acly	104112	IFNB1 Signature
Acsl1	14081	IFNB1 Signature
Adam19	11492	IFNB1 Signature
Adap2	216991	IFNB1 Signature
Adar	56417	IFNB1 Signature
Adm	11535	IFNB1 Signature
Aff3	16764	IFNB1 Signature
Agt	11606	IFNB1 Signature
Aim2	383619	IFNB1 Signature
Akap10	56697	IFNB1 Signature
Akap2	11641	IFNB1 Signature
Alox12	11684	IFNB1 Signature
Alox5	11689	IFNB1 Signature
Anxa4	11746	IFNB1 Signature
Apobec3	80287	IFNB1 Signature
Atf3	11910	IFNB1 Signature
Atf5	107503	IFNB1 Signature
Atm	11920	IFNB1 Signature
Atp13a1	170759	IFNB1 Signature
Bag1	12017	IFNB1 Signature
Bak1	12018	IFNB1 Signature
Bard1	12021	IFNB1 Signature
Bcl11a	14025	IFNB1 Signature
Bcl7b	12054	IFNB1 Signature
Bgn	12111	IFNB1 Signature
Blnk	17060	IFNB1 Signature
Blvra	109778	IFNB1 Signature
Blzf1	66352	IFNB1 Signature
Brca1	12189	IFNB1 Signature
Brca2	12190	IFNB1 Signature
Bst2	69550	IFNB1 Signature
Bub1	12235	IFNB1 Signature
C3ar1	12267	IFNB1 Signature
Cacna1a	12286	IFNB1 Signature
Cad	69719	IFNB1 Signature
Cald1	109624	IFNB1 Signature
Camk2a	12322	IFNB1 Signature
Capn2	12334	IFNB1 Signature
Casp1	12362	IFNB1 Signature
Cbr1	12408	IFNB1 Signature
Cbwd1	226043	IFNB1 Signature
Ccl2	20296	IFNB1 Signature
Ccl4	20303	IFNB1 Signature
Ccl7	20306	IFNB1 Signature
Ccna1	12427	IFNB1 Signature
Ccnd2	12444	IFNB1 Signature
Ccr1	12768	IFNB1 Signature
Ccr5	12774	IFNB1 Signature
Ccrl2	54199	IFNB1 Signature
Cd163	93671	IFNB1 Signature
Cd164	53599	IFNB1 Signature
Cd2ap	12488	IFNB1 Signature
Cd38	12494	IFNB1 Signature
Cd4	12504	IFNB1 Signature
Cd59b	333883	IFNB1 Signature
Cd69	12515	IFNB1 Signature
Cd72	12517	IFNB1 Signature
Cd86	12524	IFNB1 Signature
Cdk17	237459	IFNB1 Signature
Cdkn1a	12575	IFNB1 Signature
Cenpa	12615	IFNB1 Signature
Cenpe	229841	IFNB1 Signature
Cep110	26920	IFNB1 Signature
Cfb	14962	IFNB1 Signature
Cflar	12633	IFNB1 Signature
Ch25h	12642	IFNB1 Signature
Chka	12660	IFNB1 Signature
Cish	12700	IFNB1 Signature
Ckb	12709	IFNB1 Signature
Cntn6	53870	IFNB1 Signature
Col3a1	12825	IFNB1 Signature
Cox17	12856	IFNB1 Signature
Csf2rb	12983	IFNB1 Signature
Cxcl1	14825	IFNB1 Signature
Cxcl10	15945	IFNB1 Signature
Cxcl11	56066	IFNB1 Signature
Cxcl9	17329	IFNB1 Signature
Cxcr2	12765	IFNB1 Signature
Cybb	13058	IFNB1 Signature
Cyp19a1	13075	IFNB1 Signature
Cyp2j6	13110	IFNB1 Signature
Dab2	13132	IFNB1 Signature
Defb1	13214	IFNB1 Signature
Dhfr	13361	IFNB1 Signature
Dll1	13388	IFNB1 Signature
Dmxl1	240283	IFNB1 Signature
Dnmt1	13433	IFNB1 Signature
Drap1	66556	IFNB1 Signature
Dsc2	13506	IFNB1 Signature
Dusp5	240672	IFNB1 Signature
Dusp7	235584	IFNB1 Signature
Dynlt1f	100040531	IFNB1 Signature
Dysf	26903	IFNB1 Signature
E2f1	13555	IFNB1 Signature
Ece1	230857	IFNB1 Signature
Edn1	13614	IFNB1 Signature
Egr1	13653	IFNB1 Signature
Eif2ak2	19106	IFNB1 Signature
Eif2b1	209354	IFNB1 Signature
Eif4enif1	74203	IFNB1 Signature
Elf1	13709	IFNB1 Signature
Elf4	56501	IFNB1 Signature
Enpp2	18606	IFNB1 Signature
Epb4.1	269587	IFNB1 Signature
Etv4	18612	IFNB1 Signature
Etv6	14011	IFNB1 Signature
F8	14069	IFNB1 Signature
Faf1	14084	IFNB1 Signature
Faim3	69169	IFNB1 Signature
Fam65b	193385	IFNB1 Signature
Fas	14102	IFNB1 Signature
Fasl	14103	IFNB1 Signature
Fbxw2	30050	IFNB1 Signature
Fcgr1	14129	IFNB1 Signature
Fgf1	14164	IFNB1 Signature
Flna	192176	IFNB1 Signature
Fmr1	14265	IFNB1 Signature
Foxo1	56458	IFNB1 Signature
Fpr2	14289	IFNB1 Signature
Ftl1	14325	IFNB1 Signature
Fut4	14345	IFNB1 Signature
Gadd45b	17873	IFNB1 Signature
Gbp2	14469	IFNB1 Signature
Gch1	14528	IFNB1 Signature
Gcnt1	14537	IFNB1 Signature
Gls	14660	IFNB1 Signature
Gm14446	667373	IFNB1 Signature
Gm17296	212728	IFNB1 Signature
Gmpr	66355	IFNB1 Signature
Gpi1	14751	IFNB1 Signature
Gpr161	240888	IFNB1 Signature
Guk1	14923	IFNB1 Signature
H2-Oa	15001	IFNB1 Signature
Hbb-y	15135	IFNB1 Signature
Hhex	15242	IFNB1 Signature
Hist2h2aa1	15267	IFNB1 Signature
Hk2	15277	IFNB1 Signature
Hs6st1	50785	IFNB1 Signature
Hsp90aa1	15519	IFNB1 Signature
Hspa1a	193740	IFNB1 Signature
Hspa1l	15482	IFNB1 Signature
Ido1	15930	IFNB1 Signature
Ifi204	15951	IFNB1 Signature
Ifi27l2a	76933	IFNB1 Signature
Ifi27l2b	217845	IFNB1 Signature
Ifi35	70110	IFNB1 Signature
Ifi44	99899	IFNB1 Signature
Ifitm1	68713	IFNB1 Signature
Ifitm2	80876	IFNB1 Signature
Ifitm3	66141	IFNB1 Signature
Ifng	15978	IFNB1 Signature
Ifrd1	15982	IFNB1 Signature
Igj	16069	IFNB1 Signature
Ikbke	56489	IFNB1 Signature
Ikbkg	16151	IFNB1 Signature
Il15	16168	IFNB1 Signature
Il15ra	16169	IFNB1 Signature
Il18bp	16068	IFNB1 Signature
Il18r1	16182	IFNB1 Signature
Il1rn	16181	IFNB1 Signature
Il6	16193	IFNB1 Signature
Il7	16196	IFNB1 Signature
Inadl	12695	IFNB1 Signature
Inpp5d	16331	IFNB1 Signature
Inppl1	16332	IFNB1 Signature
Irf1	16362	IFNB1 Signature
Irf2	16363	IFNB1 Signature
Irf4	16364	IFNB1 Signature
Irf7	54123	IFNB1 Signature
Irf9	16391	IFNB1 Signature
Isg15	100038882	IFNB1 Signature
Isg20	57444	IFNB1 Signature
Itgal	16408	IFNB1 Signature
Itgax	16411	IFNB1 Signature
Jak2	16452	IFNB1 Signature
Jup	16480	IFNB1 Signature
Kcna3	16491	IFNB1 Signature
Kcnmb1	16533	IFNB1 Signature
Kdelr2	66913	IFNB1 Signature
Kif20b	240641	IFNB1 Signature
Klf2	16598	IFNB1 Signature
Klf6	23849	IFNB1 Signature
Klrb1b	80782	IFNB1 Signature
Kpnb1	16211	IFNB1 Signature
Krt8	16691	IFNB1 Signature
Lag3	16768	IFNB1 Signature
Lamp3	239739	IFNB1 Signature
Lancl1	14768	IFNB1 Signature
Lap3	66988	IFNB1 Signature
Lbr	98386	IFNB1 Signature
Lepr	16847	IFNB1 Signature
Lgals2	107753	IFNB1 Signature
Lgals3bp	19039	IFNB1 Signature
Lgals9	16859	IFNB1 Signature
Lgmn	19141	IFNB1 Signature
Lmnb1	16906	IFNB1 Signature
Lmo2	16909	IFNB1 Signature
LOC102638047	102638047	IFNB1 Signature
Lta	16992	IFNB1 Signature
Ltb4r1	16995	IFNB1 Signature
Ly6e	17069	IFNB1 Signature
Lyn	17096	IFNB1 Signature
Map2k5	23938	IFNB1 Signature
Map3k8	26410	IFNB1 Signature
Mbnl1	56758	IFNB1 Signature
Mcl1	17210	IFNB1 Signature
Med1	19014	IFNB1 Signature
Mef2a	17258	IFNB1 Signature
Mfhas1	52065	IFNB1 Signature
Mgll	23945	IFNB1 Signature
Mrps15	66407	IFNB1 Signature
Ms4a7	109225	IFNB1 Signature
Msr1	20288	IFNB1 Signature
Mx1	17857	IFNB1 Signature
Mx2	17858	IFNB1 Signature
Myd88	17874	IFNB1 Signature
Nampt	59027	IFNB1 Signature
Napsa	16541	IFNB1 Signature
Nbn	27354	IFNB1 Signature
Ncf1	17969	IFNB1 Signature
Ncoa2	17978	IFNB1 Signature
Nebl	74103	IFNB1 Signature
Nek4	23955	IFNB1 Signature
Nfe2l3	18025	IFNB1 Signature
Nktr	18087	IFNB1 Signature
Nmi	64685	IFNB1 Signature
Notch1	18128	IFNB1 Signature
Nr3c1	14815	IFNB1 Signature
Nr4a3	18124	IFNB1 Signature
Nub1	53312	IFNB1 Signature
Nupr1	56312	IFNB1 Signature
Oas1g	23960	IFNB1 Signature
Oas2	246728	IFNB1 Signature
Oas3	246727	IFNB1 Signature
Pax5	18507	IFNB1 Signature
Pax8	18510	IFNB1 Signature
Pde4b	18578	IFNB1 Signature
Pdgfb	18591	IFNB1 Signature
Pdgfrl	68797	IFNB1 Signature
Pfkfb3	170768	IFNB1 Signature
Pfkp	56421	IFNB1 Signature
Pim2	18715	IFNB1 Signature
Pkd2	18764	IFNB1 Signature
Plek	56193	IFNB1 Signature
Plscr1	22038	IFNB1 Signature
Pmaip1	58801	IFNB1 Signature
Pml	18854	IFNB1 Signature
Pms2	18861	IFNB1 Signature
Ppp2r2a	71978	IFNB1 Signature
Prkag1	19082	IFNB1 Signature
Prkra	23992	IFNB1 Signature
Prkx	19108	IFNB1 Signature
Psmb8	16913	IFNB1 Signature
Psmb9	16912	IFNB1 Signature
Ptch1	19206	IFNB1 Signature
Ptger2	19217	IFNB1 Signature
Ralb	64143	IFNB1 Signature
Rasgrp1	19419	IFNB1 Signature
Rbbp6	19647	IFNB1 Signature
Rbck1	24105	IFNB1 Signature
Rere	68703	IFNB1 Signature
Rgs1	50778	IFNB1 Signature
Rgs6	50779	IFNB1 Signature
Rin1	225870	IFNB1 Signature
Ripk1	19766	IFNB1 Signature
Ripk3	56532	IFNB1 Signature
Rnf114	81018	IFNB1 Signature
Rps6ka5	73086	IFNB1 Signature
Rps9	76846	IFNB1 Signature
Rrbp1	81910	IFNB1 Signature
Rtp4	67775	IFNB1 Signature
Sat1	20229	IFNB1 Signature
Scarb2	12492	IFNB1 Signature
Sds	231691	IFNB1 Signature
Sell	20343	IFNB1 Signature
Serpind1	15160	IFNB1 Signature
Serping1	12258	IFNB1 Signature
Sftpb	20388	IFNB1 Signature
Sidt2	214597	IFNB1 Signature
Sit1	54390	IFNB1 Signature
Slamf1	27218	IFNB1 Signature
Smo	319757	IFNB1 Signature
Snx2	67804	IFNB1 Signature
Socs1	12703	IFNB1 Signature
Sos1	20662	IFNB1 Signature
Sp100	20684	IFNB1 Signature
Sp140	434484	IFNB1 Signature
Spib	272382	IFNB1 Signature
Spta1	20739	IFNB1 Signature
Sptlc2	20773	IFNB1 Signature
Srrm2	75956	IFNB1 Signature
Ssb	20823	IFNB1 Signature
St3gal5	20454	IFNB1 Signature
Stap1	56792	IFNB1 Signature
Stat1	20846	IFNB1 Signature
Stat2	20847	IFNB1 Signature
Stoml2	66592	IFNB1 Signature
Stx11	74732	IFNB1 Signature
Supt3	109115	IFNB1 Signature
Tank	21353	IFNB1 Signature
Tap1	21354	IFNB1 Signature
Tap2	21355	IFNB1 Signature
Tapbp	21356	IFNB1 Signature
Tbx21	57765	IFNB1 Signature
Tcn2	21452	IFNB1 Signature
Tfdp2	211586	IFNB1 Signature
Tff1	21784	IFNB1 Signature
Tgm1	21816	IFNB1 Signature
Thy1	21838	IFNB1 Signature
Tlr1	21897	IFNB1 Signature
Tlr3	142980	IFNB1 Signature
Tlr7	170743	IFNB1 Signature
Tnfaip2	21928	IFNB1 Signature
Tnfrsf11a	21934	IFNB1 Signature
Tnfsf10	22035	IFNB1 Signature
Tnk2	51789	IFNB1 Signature
Tor1b	30934	IFNB1 Signature
Tra2b	20462	IFNB1 Signature
Trim21	20821	IFNB1 Signature
Trim26	22670	IFNB1 Signature
Trim34a	94094	IFNB1 Signature
Trim38	214158	IFNB1 Signature
Tspan15	70423	IFNB1 Signature
Txk	22165	IFNB1 Signature
Uba7	74153	IFNB1 Signature
Ube2l6	56791	IFNB1 Signature
Ube2s	77891	IFNB1 Signature
Ube3a	22215	IFNB1 Signature
Ubqln2	54609	IFNB1 Signature
Unc93b1	54445	IFNB1 Signature
Usp15	14479	IFNB1 Signature
Usp18	24110	IFNB1 Signature
Usp25	30940	IFNB1 Signature
Uspl1	231915	IFNB1 Signature
Uvrag	78610	IFNB1 Signature
Vamp5	53620	IFNB1 Signature
Wars	22375	IFNB1 Signature
Wipf1	215280	IFNB1 Signature
Wt1	22431	IFNB1 Signature
Xaf1	327959	IFNB1 Signature
	52668	IFNB1 Signature
Acly	104112	IFNG Signature
Acsl1	14081	IFNG Signature
Aff2	14266	IFNG Signature
Aim2	383619	IFNG Signature
Akap10	56697	IFNG Signature
Atf3	11910	IFNG Signature
Atm	11920	IFNG Signature
C1qb	12260	IFNG Signature
C4a	625018	IFNG Signature
Cald1	109624	IFNG Signature
Casp1	12362	IFNG Signature
Ccnd2	12444	IFNG Signature
Ccr5	12774	IFNG Signature
Cd38	12494	IFNG Signature
Cdkn1a	12575	IFNG Signature
Cfb	14962	IFNG Signature
Ckb	12709	IFNG Signature
Cpt1b	12895	IFNG Signature
Csf2rb	12983	IFNG Signature
Ctnnd2	18163	IFNG Signature
Cxcl10	15945	IFNG Signature
Cxcl11	56066	IFNG Signature
Cxcl9	17329	IFNG Signature
Cybb	13058	IFNG Signature
Edn1	13614	IFNG Signature
Epb4.1	269587	IFNG Signature
Etaa1	68145	IFNG Signature
Etv4	18612	IFNG Signature
F8	14069	IFNG Signature
Fas	14102	IFNG Signature
Fbln1	14114	IFNG Signature
Fbxl2	72179	IFNG Signature
Fcgr1	14129	IFNG Signature
Flii	14248	IFNG Signature
Gadd45b	17873	IFNG Signature
Gbp2	14469	IFNG Signature
Gch1	14528	IFNG Signature
Gcnt1	14537	IFNG Signature
Gls	14660	IFNG Signature
Gstm1	14862	IFNG Signature
Hbb-y	15135	IFNG Signature
Hhex	15242	IFNG Signature
Hp	15439	IFNG Signature
Icam1	15894	IFNG Signature
Ido1	15930	IFNG Signature
Ifi27l2a	76933	IFNG Signature
Ifi27l2b	217845	IFNG Signature
Ifi44	99899	IFNG Signature
Igj	16069	IFNG Signature
Il15	16168	IFNG Signature
Il15ra	16169	IFNG Signature
Il18bp	16068	IFNG Signature
Il1a	16175	IFNG Signature
Il7	16196	IFNG Signature
Irf1	16362	IFNG Signature
Irf8	15900	IFNG Signature
Jak2	16452	IFNG Signature
Klf2	16598	IFNG Signature
Lap3	66988	IFNG Signature
Limk2	16886	IFNG Signature
Lmnb1	16906	IFNG Signature
Mgl2	216864	IFNG Signature
Mmp25	240047	IFNG Signature
Mrps15	66407	IFNG Signature
Msr1	20288	IFNG Signature
Net1	56349	IFNG Signature
Nin	18080	IFNG Signature
Nktr	18087	IFNG Signature
Nlrp1b	637515	IFNG Signature
Nr3c1	14815	IFNG Signature
Oas1g	23960	IFNG Signature
Oas3	246727	IFNG Signature
P2ry13	74191	IFNG Signature
Pcdh9	211712	IFNG Signature
Pla2g4c	232889	IFNG Signature
Plek	56193	IFNG Signature
Polr2b	231329	IFNG Signature
Psmb9	16912	IFNG Signature
Ptch1	19206	IFNG Signature
Ralb	64143	IFNG Signature
Rgs1	50778	IFNG Signature
Serpind1	15160	IFNG Signature
Serping1	12258	IFNG Signature
Sftpb	20388	IFNG Signature
Slamf1	27218	IFNG Signature
Slc1a5	20514	IFNG Signature
Socs1	12703	IFNG Signature
Spry4	24066	IFNG Signature
Srrm2	75956	IFNG Signature
Stat1	20846	IFNG Signature
Stat2	20847	IFNG Signature
Stx11	74732	IFNG Signature
Tap1	21354	IFNG Signature
Tap2	21355	IFNG Signature
Tbx21	57765	IFNG Signature
Tenm1	23963	IFNG Signature
Tff1	21784	IFNG Signature
Tnfaip2	21928	IFNG Signature
Tnfsf10	22035	IFNG Signature
Ubd	24108	IFNG Signature
Ube2c	68612	IFNG Signature
Ube2l6	56791	IFNG Signature
Ube3a	22215	IFNG Signature
Vamp5	53620	IFNG Signature
Vsnl1	26950	IFNG Signature
Wars	22375	IFNG Signature
Xrn1	24127	IFNG Signature
	52668	IFNG Signature
3110047P20Rik	319807	IFNK Signature
4921539E11Rik	70941	IFNK Signature
4930523C07Rik	67647	IFNK Signature
4932442L08Rik	631145	IFNK Signature
9930013L23Rik	80982	IFNK Signature
Ace2	70008	IFNK Signature
Ankrd22	52024	IFNK Signature
Antxr2	71914	IFNK Signature
B3gnt7	227327	IFNK Signature
B4galnt2	14422	IFNK Signature
Bbc3	170770	IFNK Signature
Bcl2l13	94044	IFNK Signature
Best3	382427	IFNK Signature
Bmp4	12159	IFNK Signature
Cacnb4	12298	IFNK Signature
Casp7	12369	IFNK Signature
Cbr3	109857	IFNK Signature
Cd274	60533	IFNK Signature
Cenpt	320394	IFNK Signature
Clec7a	56644	IFNK Signature
D16Ertd472e	67102	IFNK Signature
Fam46c	74645	IFNK Signature
Fbxo6	50762	IFNK Signature
Fer1l6	631797	IFNK Signature
Frmpd1	666060	IFNK Signature
Gbp5	229898	IFNK Signature
Gm11127	100529082	IFNK Signature
Hdx	245596	IFNK Signature
Helz2	229003	IFNK Signature
Hspg2	15530	IFNK Signature
Ifnk	387510	IFNK Signature
Il22ra1	230828	IFNK Signature
Kbtbd8	243574	IFNK Signature
Kcnb2	98741	IFNK Signature
Lhfpl2	218454	IFNK Signature
Mak	17152	IFNK Signature
Malt1	240354	IFNK Signature
Mastl	67121	IFNK Signature
Mmp13	17386	IFNK Signature
Ncoa7	211329	IFNK Signature
Nlrc5	434341	IFNK Signature
Ogfr	72075	IFNK Signature
Parp14	547253	IFNK Signature
Pla2g4e	329502	IFNK Signature
Plekha4	69217	IFNK Signature
Ppargc1a	19017	IFNK Signature
Ppif	105675	IFNK Signature
Prdm8	77630	IFNK Signature
Prkd2	101540	IFNK Signature
Prox1	19130	IFNK Signature
Rasgrp3	240168	IFNK Signature
Rbm11	224344	IFNK Signature
Rbm43	71684	IFNK Signature
Rnf122	68867	IFNK Signature
Runx2	12393	IFNK Signature
Sectm1a	209588	IFNK Signature
Sidt1	320007	IFNK Signature
Slc13a5	237831	IFNK Signature
Slc15a3	65221	IFNK Signature
Slc16a12	240638	IFNK Signature
Slc25a28	246696	IFNK Signature
Slc25a36	192287	IFNK Signature
Slc28a3	114304	IFNK Signature
Slfn5	327978	IFNK Signature
Snap47	67826	IFNK Signature
Stard5	170460	IFNK Signature
Synpo2	118449	IFNK Signature
Tagap	72536	IFNK Signature
Tcf4	21413	IFNK Signature
Tmem140	68487	IFNK Signature
Tmem229b	268567	IFNK Signature
Tmem27	57394	IFNK Signature
Tnf	21926	IFNK Signature
Trank1	320429	IFNK Signature
Trex1	22040	IFNK Signature
Trim25	217069	IFNK Signature
Triml2	622117	IFNK Signature
Trpm6	225997	IFNK Signature
Uba7	74153	IFNK Signature
Wfdc5	209232	IFNK Signature
Zfp42	22702	IFNK Signature
Zfp608	269023	IFNK Signature
Zhx2	387609	IFNK Signature
Abcb10	56199	IFNW1 Signature
Acly	104112	IFNW1 Signature
Acsl1	14081	IFNW1 Signature
Adar	56417	IFNW1 Signature
Adm	11535	IFNW1 Signature
Agt	11606	IFNW1 Signature
Aim2	383619	IFNW1 Signature
Akap10	56697	IFNW1 Signature
Akap2	11641	IFNW1 Signature
Alox12	11684	IFNW1 Signature
Anxa4	11746	IFNW1 Signature
Apobec3	80287	IFNW1 Signature
Atf3	11910	IFNW1 Signature
Atf5	107503	IFNW1 Signature
Atm	11920	IFNW1 Signature
Bag1	12017	IFNW1 Signature
Bard1	12021	IFNW1 Signature
Bcl11a	14025	IFNW1 Signature
Bcl7b	12054	IFNW1 Signature
Blvra	109778	IFNW1 Signature
Blzf1	66352	IFNW1 Signature
Brca1	12189	IFNW1 Signature
Brca2	12190	IFNW1 Signature
Brd4	57261	IFNW1 Signature
Bst2	69550	IFNW1 Signature
C3ar1	12267	IFNW1 Signature
Cad	69719	IFNW1 Signature
Cald1	109624	IFNW1 Signature
Camk2a	12322	IFNW1 Signature
Capn2	12334	IFNW1 Signature
Cask	12361	IFNW1 Signature
Casp1	12362	IFNW1 Signature
Cbr1	12408	IFNW1 Signature
Cbwd1	226043	IFNW1 Signature
Ccl2	20296	IFNW1 Signature
Ccl7	20306	IFNW1 Signature
Ccna1	12427	IFNW1 Signature
Ccnd2	12444	IFNW1 Signature
Ccr1	12768	IFNW1 Signature
Ccr5	12774	IFNW1 Signature
Ccr7	12775	IFNW1 Signature
Ccrl2	54199	IFNW1 Signature
Cd164	53599	IFNW1 Signature
Cd2ap	12488	IFNW1 Signature
Cd38	12494	IFNW1 Signature
Cd4	12504	IFNW1 Signature
Cd47	16423	IFNW1 Signature
Cd59b	333883	IFNW1 Signature
Cd69	12515	IFNW1 Signature
Cdkn1a	12575	IFNW1 Signature
Cenpe	229841	IFNW1 Signature
Cep110	26920	IFNW1 Signature
Cfb	14962	IFNW1 Signature
Cflar	12633	IFNW1 Signature
Chka	12660	IFNW1 Signature
Ckb	12709	IFNW1 Signature
Cntn6	53870	IFNW1 Signature
Col3a1	12825	IFNW1 Signature
Csf2rb	12983	IFNW1 Signature
Cxcl10	15945	IFNW1 Signature
Cxcl11	56066	IFNW1 Signature
Cxcl9	17329	IFNW1 Signature
Cxcr2	12765	IFNW1 Signature
Cybb	13058	IFNW1 Signature
Cyp19a1	13075	IFNW1 Signature
Cyp2j6	13110	IFNW1 Signature
Defb1	13214	IFNW1 Signature
Dll1	13388	IFNW1 Signature
Dsc2	13506	IFNW1 Signature
Dusp5	240672	IFNW1 Signature
Dusp7	235584	IFNW1 Signature
Dynlt1f	100040531	IFNW1 Signature
Dysf	26903	IFNW1 Signature
E2f1	13555	IFNW1 Signature
Ece1	230857	IFNW1 Signature
Edn1	13614	IFNW1 Signature
Egr1	13653	IFNW1 Signature
Eif2ak2	19106	IFNW1 Signature
Eif2b1	209354	IFNW1 Signature
Eif4enif1	74203	IFNW1 Signature
Enpp2	18606	IFNW1 Signature
Epb4.1	269587	IFNW1 Signature
Ercc4	50505	IFNW1 Signature
Etv4	18612	IFNW1 Signature
Etv6	14011	IFNW1 Signature
F8	14069	IFNW1 Signature
Faf1	14084	IFNW1 Signature
Fas	14102	IFNW1 Signature
Fasl	14103	IFNW1 Signature
Fcer1g	14127	IFNW1 Signature
Fgf1	14164	IFNW1 Signature
Fgf13	14168	IFNW1 Signature
Fgl2	14190	IFNW1 Signature
Flna	192176	IFNW1 Signature
Fmr1	14265	IFNW1 Signature
Foxo1	56458	IFNW1 Signature
Ftl1	14325	IFNW1 Signature
Fut4	14345	IFNW1 Signature
Gadd45b	17873	IFNW1 Signature
Gbp2	14469	IFNW1 Signature
Gch1	14528	IFNW1 Signature
Gcnt1	14537	IFNW1 Signature
Glb1	12091	IFNW1 Signature
Gls	14660	IFNW1 Signature
Gm14446	667373	IFNW1 Signature
Gm17296	212728	IFNW1 Signature
Gmpr	66355	IFNW1 Signature
Gpr161	240888	IFNW1 Signature
Gstm1	14862	IFNW1 Signature
Guk1	14923	IFNW1 Signature
H2-Oa	15001	IFNW1 Signature
Hbb-y	15135	IFNW1 Signature
Hhex	15242	IFNW1 Signature
Hist2h2aa1	15267	IFNW1 Signature
Hs6st1	50785	IFNW1 Signature
Hsp90aa1	15519	IFNW1 Signature
Hspa1a	193740	IFNW1 Signature
Ido1	15930	IFNW1 Signature
Ifi204	15951	IFNW1 Signature
Ifi27	52668	IFNW1 Signature
Ifi27l2a	76933	IFNW1 Signature
Ifi27l2b	217845	IFNW1 Signature
Ifi35	70110	IFNW1 Signature
Ifi44	99899	IFNW1 Signature
Ifitm1	68713	IFNW1 Signature
Ifitm2	80876	IFNW1 Signature
Ifitm3	66141	IFNW1 Signature
Ifrd1	15982	IFNW1 Signature
Igj	16069	IFNW1 Signature
Ikbkg	16151	IFNW1 Signature
Il15	16168	IFNW1 Signature
Il15ra	16169	IFNW1 Signature
Il18r1	16182	IFNW1 Signature
Il1rn	16181	IFNW1 Signature
Il6	16193	IFNW1 Signature
Il7	16196	IFNW1 Signature
Inadl	12695	IFNW1 Signature
Inppl1	16332	IFNW1 Signature
Irf1	16362	IFNW1 Signature
Irf2	16363	IFNW1 Signature
Irf7	54123	IFNW1 Signature
Irf8	15900	IFNW1 Signature
Isg15	100038882	IFNW1 Signature
Isg20	57444	IFNW1 Signature
Itih2	16425	IFNW1 Signature
Jak2	16452	IFNW1 Signature
Jup	16480	IFNW1 Signature
Kcna3	16491	IFNW1 Signature
Kdelr2	66913	IFNW1 Signature
Kif20b	240641	IFNW1 Signature
Klf6	23849	IFNW1 Signature
Kpnb1	16211	IFNW1 Signature
Krt8	16691	IFNW1 Signature
Lag3	16768	IFNW1 Signature
Lamp3	239739	IFNW1 Signature
Lap3	66988	IFNW1 Signature
Lepr	16847	IFNW1 Signature
Lgals2	107753	IFNW1 Signature
Lgals3bp	19039	IFNW1 Signature
Lgals9	16859	IFNW1 Signature
Lgmn	19141	IFNW1 Signature
Lmnb1	16906	IFNW1 Signature
Lmo2	16909	IFNW1 Signature
LOC102638047	102638047	IFNW1 Signature
Ly6e	17069	IFNW1 Signature
Lyn	17096	IFNW1 Signature
Map2k5	23938	IFNW1 Signature
Mbnl1	56758	IFNW1 Signature
Mcl1	17210	IFNW1 Signature
Med1	19014	IFNW1 Signature
Mef2a	17258	IFNW1 Signature
Mgll	23945	IFNW1 Signature
Mlf1	17349	IFNW1 Signature
Mmp16	17389	IFNW1 Signature
Mrps15	66407	IFNW1 Signature
Ms4a7	109225	IFNW1 Signature
Msr1	20288	IFNW1 Signature
Mx1	17857	IFNW1 Signature
Mx2	17858	IFNW1 Signature
Myd88	17874	IFNW1 Signature
Nampt	59027	IFNW1 Signature
Ncf1	17969	IFNW1 Signature
Nfe2l3	18025	IFNW1 Signature
Nktr	18087	IFNW1 Signature
Nmi	64685	IFNW1 Signature
Nptx1	18164	IFNW1 Signature
Nr3c1	14815	IFNW1 Signature
Nub1	53312	IFNW1 Signature
Nupr1	56312	IFNW1 Signature
Oas1g	23960	IFNW1 Signature
Oas2	246728	IFNW1 Signature
Oas3	246727	IFNW1 Signature
Osbpl1a	64291	IFNW1 Signature
Pax8	18510	IFNW1 Signature
Pdgfb	18591	IFNW1 Signature
Pdgfrl	68797	IFNW1 Signature
Pkd2	18764	IFNW1 Signature
Plek	56193	IFNW1 Signature
Plscr1	22038	IFNW1 Signature
Pmaip1	58801	IFNW1 Signature
Pml	18854	IFNW1 Signature
Ppp2r2a	71978	IFNW1 Signature
Prkag1	19082	IFNW1 Signature
Prkra	23992	IFNW1 Signature
Psmb9	16912	IFNW1 Signature
Ptch1	19206	IFNW1 Signature
Ptger2	19217	IFNW1 Signature
Ralb	64143	IFNW1 Signature
Rbbp6	19647	IFNW1 Signature
Rbck1	24105	IFNW1 Signature
Rere	68703	IFNW1 Signature
Rgs1	50778	IFNW1 Signature
Rgs6	50779	IFNW1 Signature
Rps6ka5	73086	IFNW1 Signature
Rtp4	67775	IFNW1 Signature
Sat1	20229	IFNW1 Signature
Scarb2	12492	IFNW1 Signature
Sds	231691	IFNW1 Signature
Sell	20343	IFNW1 Signature
Serpind1	15160	IFNW1 Signature
Serping1	12258	IFNW1 Signature
Sft2d2	108735	IFNW1 Signature
Sit1	54390	IFNW1 Signature
Slc30a4	22785	IFNW1 Signature
Socs1	12703	IFNW1 Signature
Sos1	20662	IFNW1 Signature
Sp100	20684	IFNW1 Signature
Sp140	434484	IFNW1 Signature
Spib	272382	IFNW1 Signature
Srrm2	75956	IFNW1 Signature
St3gal5	20454	IFNW1 Signature
Stap1	56792	IFNW1 Signature
Stat1	20846	IFNW1 Signature
Stat2	20847	IFNW1 Signature
Stx11	74732	IFNW1 Signature
Supt3	109115	IFNW1 Signature
Tap1	21354	IFNW1 Signature
Tap2	21355	IFNW1 Signature
Tbx21	57765	IFNW1 Signature
Tcn2	21452	IFNW1 Signature
Tfdp2	211586	IFNW1 Signature
Tff1	21784	IFNW1 Signature
Tgm1	21816	IFNW1 Signature
Thy1	21838	IFNW1 Signature
Tlr3	142980	IFNW1 Signature
Tlr7	170743	IFNW1 Signature
Tnfaip3	21929	IFNW1 Signature
Tnfrsf11a	21934	IFNW1 Signature
Tnfsf10	22035	IFNW1 Signature
Tnk2	51789	IFNW1 Signature
Tor1b	30934	IFNW1 Signature
Tra2b	20462	IFNW1 Signature
Trim21	20821	IFNW1 Signature
Trim34a	94094	IFNW1 Signature
Trim38	214158	IFNW1 Signature
Uba7	74153	IFNW1 Signature
Ube2c	68612	IFNW1 Signature
Ube2l6	56791	IFNW1 Signature
Ube2s	77891	IFNW1 Signature
Unc93b1	54445	IFNW1 Signature
Usp18	24110	IFNW1 Signature
Usp25	30940	IFNW1 Signature
Wars	22375	IFNW1 Signature
Wipf1	215280	IFNW1 Signature
Wt1	22431	IFNW1 Signature
Xaf1	327959	IFNW1 Signature
